# Supplementary material for: Small RNA-Seq reveals novel miRNAs shaping the transcriptomic identity of rat brain structures
Source: Life Sci Alliance. 2018 Sep 30;1(5):e201800018. doi: 10.26508/lsa.201800018 (PMC6238413; doi:10.26508/lsa.201800018)
Supplement: Supplementary file 1 [file LSA-2018-00018_TableS1.xlsx]

## Sheet: Feuille1
Sample	Total sequences	Sequences flagged as poor quality	Sequence length	% GC
Rat 1 olfactory bulb	28954849	0	15-68	41
Rat 1 cortex	27845335	0	15-68	43
Rat 1 hippocampus	26002049	0	15-68	43
Rat 1 spinal cord	26197028	0	15-68	44
Rat 1 striatum	29891300	0	15-68	43
Rat 2 olfactory bulb	33940302	0	15-68	41
Rat 2 cortex	32426526	0	15-68	43
Rat 2 hippocampus	27741661	0	15-68	42
Rat 2 spinal cord	32950320	0	15-68	44
Rat 2 striatum	34161900	0	15-68	43
Rat 3 olfactory bulb	31518785	0	15-68	42
Rat 3 cortex	19533750	0	15-68	43
Rat 3 hippocampus	27691764	0	15-68	43
Rat 3 spinal cord	37745356	0	15-68	44
Rat 3 striatum	25482476	0	15-68	44
