# Supplementary material for: Small RNA-Seq reveals novel miRNAs shaping the transcriptomic identity of rat brain structures
Source: Life Sci Alliance. 2018 Sep 30;1(5):e201800018. doi: 10.26508/lsa.201800018 (PMC6238413; doi:10.26508/lsa.201800018)
Supplement: Supplementary file 2 [file LSA-2018-00018_TableS2.xlsx]

## Sheet: Feuille1
Novel miRNA name	genomic location	Pre-miRNA sequence
rno-novel-mir-1	chr10:+:102309360:102309467	UUGCUCAUCUCCUGUACCAGACUUGGCUGGAUGAGGAGCUCAGGGUGUAAGAGGCAGGUUUGAGAUCUGGGACCAGGCAGGCAGGUGAUGNNNNNNNNNNNNNNNNNN
rno-novel-mir-2	chr10:+:103198402:103198509	GCGGAAGCUUCGUUCUUUUUCCGUUGUUCGGUGCUCGCUCCUGUGAGUUUUUCUGGGCAGGUGGGGAAGGGAGUUAAAUCCGAGGCAAUCCGUAGCCGGGUUGGGUUU
rno-novel-mir-3	chr10:+:103955954:103956061	AUCGCGAGCUCAGCGAAGGCUGGCGGACCGCAGGGAGAGUGCGCACCGGAAGCGGUCCUGGGAGGUGAACAUGGCGGCCGCCUGGGGCCUACGCUGGAGCCUGAGCCG
rno-novel-mir-4	chr10:+:103956004:103956111	AGCGGUCCUGGGAGGUGAACAUGGCGGCCGCCUGGGGCCUACGCUGGAGCCUGAGCCGAGCUGGAACCUUGUUGCUCCCGCCGCUCGCGCGCUGUGCUCGCCGGACUC
rno-novel-mir-5	chr10:+:103972723:103972831	CGGCUCUCCCUGCCGAGGAAUGGGCCGGCCCGGCGGCGGGCGGGCAGCGGCGGCCCAAGAUGGCGGAGCUGCAGCUGGACCCGGCAAUGGCGGGGCUGGGAGGGGGUGG
rno-novel-mir-6	chr10:+:104431970:104432077	CCACCCAGCAGGGCUACCCCAUGGGUGAGUAGAGCUGGUUUCUCUCGAGGGCCUCCCAGGCCCUGCAGCACAGUCAAGAGCGCUCCGAACCUCCGUGGGGAACUGAGA
rno-novel-mir-7	chr10:+:104455413:104455524	UCUGAUUCUCCUCCCACACAGAACCCUCAGGUCUGUCUUGUCCCCCUGAGGGCAUCUAAGGGAGGCACCCAGAAAAACCAGAGGCAGGCCGGGGAGCUGUGUCAGCUGAGGC
rno-novel-mir-8	chr10:+:104680392:104680500	GGGCUGUUAGCCCUGGCCUAACACUCUGGCUCUGCUUUAUUCAGAGGACCUGGGGAGAGCUGUGUGGGACAGUCAGGUGUACAUGGCCUCUAGGUUCCUAUGGGAACCC
rno-novel-mir-9	chr10:+:104689316:104689423	CGGCAGCGGCGCAAAACCUAAGAGGUCUGGUAGUGCUAGGGAAGAGGCCUGUUGGACCGCUGCAGGGCUGAGAGCUGCCACUAGGGAGCAACACAUCCGUGUAGUUCC
rno-novel-mir-10	chr10:+:105690111:105690222	GAAGAAGAAGAAGAAGAAGAAGAAGAAGAAGAAGAAGAAGAAGAAGAAGAAGAAGAAGAAAUGCUGCUUCUGCUUCUGCUUCUCCUCCUUCUCCUCCUCCCUCCUCCUCCUC
rno-novel-mir-11	chr10:+:106090475:106090582	CUGAAUUACUGAGAUCCCAGCCAGGCCUUUGAAGUACAGCAGUGAUGCUGUUGCUAACGUGGGCUGCUGCCUCAGUGUCCCUGGGCUUCAGGCGCGGCUGUCCGUCCU
rno-novel-mir-12	chr10:+:106282796:106282905	AGGGACAGGACAAACUGUUGUGGCUGCUGUAGCACCUCUCUUCUGCCUCUCGGGGCUCUGAGCAGGCCCACUAAAUCCAGUAGAAGGCUGCCCCUAGCUACUGUCCCUAU
rno-novel-mir-13	chr10:+:106380191:106380298	UCAAGUGGCUCCGGAGCGCCCUUUUUAGAGUCCAAACCUUGGGUCAGAUGCCCCAGGGUCAGGGACCACAGGGUUGGAAGUAGCAGGGAGCAGGGAUUGCAGGGAGGG
rno-novel-mir-14	chr10:+:106390384:106390491	GAAAGUGAGGGCUGGGAAGAUGGCGCAGCGGUUAGGAGCACCAACUGCUCUUCCAAAGGUCCUGAGUUCAAUUCCCAGCACCCACAUGAUGGCUCACAACCAUCUGUA
rno-novel-mir-15	chr10:+:106971554:106971661	GGCUCGAAGCGCAGAGACCGAAACAUGAGGAGGACCGGCGGGGUGCAGCACGGGGCUCUACCCACCUGAGCCUCGCUCGGUCCCCGCGCAUGUUGCCCCCUACCACUA
rno-novel-mir-16	chr10:+:107026004:107026111	CCUGAAGCCACCCUGAGGCCUUUCUGUCCACUGCUUCCUUUGACACAGCACUGUUGGGUGGUGGUGGACAGCAGUUUUAGAGCAAGUACUGAGCUUUGCUCCCCCUAC
rno-novel-mir-17	chr10:+:10725810:10725917	GGCGGUGGUUGGGUGGUAAGAUGGCGGCUGUGAGUCUGCGGCUCGGCGACUUGGUGUGGUGAGUCCUGGCCACCAGAGCUGAACGAAAGACGGCGCGAAGCUGCUUUU
rno-novel-mir-18	chr10:+:1072909:1073019	AUUGCUGUUUCUUUUCUCCCAAUCCACAGCUGCAGACUCUAUCUGAACCCACUGAUCCAUUAAUUUAUUUGACUUUGGGGUUAAGGAUUGGAGAAAGAGAGACAGAGACAG
rno-novel-mir-19	chr10:+:10808727:10808838	AACAGAACGCCCGUCGCCUUCCCGGGGUGCUCUGCGCUGCCCGACAAUUACUUCCGGGGUGGGCCGGGCGCAGGGCUGUUGGCCGGUGAGGGAGCGUGCAGCUGCUGCUGGA
rno-novel-mir-20	chr10:+:10808777:10808888	CUUCCGGGGUGGGCCGGGCGCAGGGCUGUUGGCCGGUGAGGGAGCGUGCAGCUGCUGCUGGAGGGUGGCGCGGGAACCUGAGGCCUUGCAGGUAGGCCGGGCCGCGGCGGGG
rno-novel-mir-21	chr10:+:108166397:108166505	GGCUGAUCUCGGCGAGGCGCAGGCGGCGGCCGGUCAAUGCAGGGUCGCGGGCAGGGGGGCGCCCGGGACUCUAGGAGACCUCGGGACUGGCGCCCGCCCCCGCCAUGGC
rno-novel-mir-22	chr10:+:108412140:108412248	ACCAAGGAGGGAGGUGAACUGCAACUGAGGGAGGUGACCAUCUUGGGAGUGACCACAGCUCCCACCCAGGUCCUUUCCAAUGGCAUCCCUGUCUCCAAUUUCACCUACA
rno-novel-mir-23	chr10:+:108630832:108630939	GCGUCGAGGCCCUAACCAUGGCUCACACGGCCACAGAAUGGCCACCAGAGGAAACCCUGUCGCUCUGGAAAGGGUAAUGGGGUCGGGGUCGUGCAGUAGCCAAGGGGG
rno-novel-mir-24	chr10:+:108633800:108633907	AUCUAGUGAGCCGUCUCCACACCACCAGACCAGACGGAUGUCUCUCAGCAUCCUUUUCCAGUCUCUGUGGUCAGAUGGAACAAAACGCCUCAGUCUGGGUCACCUGUA
rno-novel-mir-25	chr10:+:10882316:10882428	AUCUCGACAUUUCUACAGUGGCUCUCCCCCACUUCCCAAGGUUCUCGCGUUCUCAGCCUCAAAGGGAACACCUUUAACCUGACGGGAACUGGGUAGCCACCAAGCGUUAGAGG
rno-novel-mir-26	chr10:+:108843243:108843354	AGUCUUCAUUUGUGCUUUGCCCCCUGGGGUGUAGGCAGUGGAGUGAUGGUGGGCAGUGUGGGAAGAUGGCUGCCACCCUGCUUCACUCUUGACUCCAGGCGUGGUUGAGGAG
rno-novel-mir-27	chr10:+:10888928:10889035	CUCUUCCUGCAGGACAGGCCAAGAGUCAGGCAAGGAUGCUUUGCCUUGCGUGCUCUGGAAGGCUUCCAGGAGGUGGUGAUUUCUAGCAGCACCUUGAAAGGCAGAUGA
rno-novel-mir-28	chr10:+:109041714:109041823	CUAGCCAGCCAUUAAGGCCAUCACCCAUCCUCUACCAGCCUGGACAGAGGCUAGCGUGCUGGUAGGGGAUGGGUGAUGGCCUUAAUGGUCCAUGAGAAAAGAGCAGAGAG
rno-novel-mir-29	chr10:+:109199825:109199936	GACUAAUACAGGCCUAGAGCAUGGGCCCCUGCUGGAUGGCCUCCCUGUUCAUAGCCCCUGAUUCCUCAGGGACACCAUCGCAGCAGGGGACAAAGGACUCGGGCCCAGGUGG
rno-novel-mir-30	chr10:+:109235148:109235255	GAAGGCCUUAGAGGAAGAGAGGAAGGGCUUCUCAGAGAGGCAUGGGGAUCUGGGGAGGACCUGGGGAGUUAUGCGGAGGGGGAGCCUCCAAUUCCCUGGGUCUCAUUA
rno-novel-mir-31	chr10:+:109334113:109334227	UGUCUUUGAAGUUUUGCUCCUUCGCUAGUGACUGAGGCAGCUCUAAGACGAGAGUCUUGCGGGGUACCAUCUCUAGCCGGAAGAGCAGAAGAGGAAGGGAAGGACUUUCCGGUGA
rno-novel-mir-32	chr10:+:109334120:109334227	GAAGUUUUGCUCCUUCGCUAGUGACUGAGGCAGCUCUAAGACGAGAGUCUUGCGGGGUACCAUCUCUAGCCGGAAGAGCAGAAGAGGAAGGGAAGGACUUUCCGGUGA
rno-novel-mir-33	chr10:+:109373754:109373862	UUCAGGGGGUGUCGCCGAAGAGGAGGUUCUACCCCAGAGAAGAUACUGUAAACUCCAAUGCUUCAGGAUUCGGGCUGUGAGACUGAGAGUGUCUGCAGCUUCGAGCUGG
rno-novel-mir-34	chr10:+:109373755:109373862	UCAGGGGGUGUCGCCGAAGAGGAGGUUCUACCCCAGAGAAGAUACUGUAAACUCCAAUGCUUCAGGAUUCGGGCUGUGAGACUGAGAGUGUCUGCAGCUUCGAGCUGG
rno-novel-mir-35	chr10:+:109411595:109411705	AAACACCUAAUGCUGGUCUCAAGGCCCGCCGCAUUUCUGGUCCUGGCUCUCAAGGCAAAAGGCGGCAUUCCAUGAGUGUCAGGACCUGAAGACCAGCUAAUCCUUGCCCUC
rno-novel-mir-36	chr10:+:109479238:109479351	UUUUCUUAAACUUCCUGGGUCCCUCCUCACCCUUCGGUAUCUGCUGGUCUGCCCUGCAGAGACGAGGCAUGAAGGGGAAAGCCAGGAAGCUGUUCUACAAGGCCAUCGUCCGAG
rno-novel-mir-37	chr10:+:109505810:109505924	AGCCCCAGGCUUUUGUUCCUCCUAAUCUUGAGGUCCGCUUUUGCUCUGUUUGCCCAGACAACAGUGUGUGGAGCGAGGAGAGGGAGAGUGUGAAGGGCAGAGCUGAGGAAACUGA
rno-novel-mir-38	chr10:+:109807315:109807429	UCCGCCUUCUGCUUUUCCAGCUCCUCCUUCUGUGUCACCCGCUUCACUCGACAGCUGGCUGCGUAGCCUCGGUUCUUGAGUGUGCGCCGGCGCUGCUUCAGCUGGAUAAUCUCUU
rno-novel-mir-39	chr10:+:109924693:109924801	UCAGCUAAGGCAGAUUUUGCACCAGGGUCAGGCCUUUGGGCAGCCCUAAACCUUUGGGAGUGACAACAGGUAGAGCAGAACAAAGGCCUCUACCUUGGGAAGGACACCA
rno-novel-mir-40	chr10:+:109969891:109970000	AGCCACCUCUCCCGCUCUUCUUCCCUCUGUGCAUGUGUAGGUGGCACUUGCUCAAGUUAGUACAGAGAAGCUGGUGGGGUCUAGGGAAGUAGGUCAGCUGGUUUCCCUGA
rno-novel-mir-41	chr10:+:110006568:110006675	CGGUCAUCGUGGCCCAGCUUUCUCAGACACCCACCCUUUCUGUGGCCGCCUUGGAGACCAGGAUGCGGGCAGGGACGAGAGCAGUAGGCAGGAUAGGGAACACUGACG
rno-novel-mir-42	chr10:+:110006618:110006725	UUGGAGACCAGGAUGCGGGCAGGGACGAGAGCAGUAGGCAGGAUAGGGAACACUGACGGGCGCGUGCCGCGGUCUCCUGAGUCCGUUCAGUGUCCAGGCGCGGCCAUC
rno-novel-mir-43	chr10:+:110496228:110496340	UAUAACCUGUGGCAUUGGCUGAACUGGAACUUGCUGUGGGGACCAGGCUGGCUUGGACCUCACAGAGCUCUACCUGCCUUUGUCCCUGCUUCAGGAUCCAGCUCUAAGUUUAG
rno-novel-mir-44	chr10:+:110583536:110583647	AGCGCUGAAUUCAUUUAAAUACUGCAGGAGUACAGAGCACUGAUCUAAUAUCUACAAAACAGAAUUAGUGUUUCGAACCUCUGCAGUAUGGAAAUUGCAAAGUGGGUUACAA
rno-novel-mir-45	chr10:+:110584296:110584407	AGAGCUACACCCUAAAGGAAAGGUCUAAAUCUGUGCUGUCCAGGCUGGCAGUUACUGGCAUUGGACCACACAGUUUUAGGCCCUUGCUAGACCUUGUGGCAUUGCCAGGGGA
rno-novel-mir-46	chr10:+:110820162:110820276	UACCUCUGCUACUUUGGGGACAUGGGGAGAGUAGAGGACAGCACUGCUUGACUCCUCAGUGUAGUGGCUCUUCACUCUCCCCAGUCCCCAAGGAAGGCAUCAGGGUACCUGGCCU
rno-novel-mir-47	chr10:+:11082391:11082502	GUUGGGGAUUUGGCUCAGUGGUAGAGCCUUGCCUAGGAAGCGCAAGGUCCUGGGUUCAAUCCCCAGCCCUGAGGGGGGAAAAAAAAAAAAAAAAGUUCAAGGUCCAUUCAUA
rno-novel-mir-48	chr10:+:11138565:11138677	CAAAGCAGAGAGCUUGGGCCCCCCAGCAGCGGGGCUGUCUGUCUGAGGAGGUGGGGCCCAGGCACCUCUUUUCCUGGGACCAGCCCUCUUGCUUGGUUCUGAUAUGCCUGCGA
rno-novel-mir-49	chr10:+:11138566:11138677	AAAGCAGAGAGCUUGGGCCCCCCAGCAGCGGGGCUGUCUGUCUGAGGAGGUGGGGCCCAGGCACCUCUUUUCCUGGGACCAGCCCUCUUGCUUGGUUCUGAUAUGCCUGCGA
rno-novel-mir-50	chr10:+:11138616:11138727	UGGGGCCCAGGCACCUCUUUUCCUGGGACCAGCCCUCUUGCUUGGUUCUGAUAUGCCUGCGAUGGGGGUUUCUCCCACAGCUGCAGAAGCCAGGCCGCCUGCCUGACACAGC
rno-novel-mir-51	chr10:+:112583365:112583472	GGCGGCCUUUUCCAGGGUACCUUGUUGCAGGAUUCGCUUAGUAGCUAAGCCUACUUAAAUGGUCCUGGCUGCUGUGCUCUGUGUCCUGCGGUUGGAUUCUGUUAGGCA
rno-novel-mir-52	chr10:+:112583415:112583522	CUACUUAAAUGGUCCUGGCUGCUGUGCUCUGUGUCCUGCGGUUGGAUUCUGUUAGGCAUGCUCAGGCAAGCUUCAAAGUUGCGACAUGGUGAGCACAGGGUCACUGCA
rno-novel-mir-53	chr10:+:11337799:11337906	CUCUUCCUGCAGGACAGGCCAAGAGUCAGGCAAGGAUGCUUUGCCUUGCGUGCUCUGGAAGGCUUCCAGGAGGUGGUGAUUUCUAGCAGCACCUUGAAAGGCAGAUGA
rno-novel-mir-54	chr10:+:11512926:11513036	CUGAUAUAAAGUGCCAGUAACUCACCUGGGGGAGGGGCUAUAAAAGGGAGCAGGGCUAGAAGCUCAGCAAGCCCCCUCCUGGCAUCUCUCGGGUACCUGGGCCCACAUUCC
rno-novel-mir-55	chr10:+:11738861:11738968	AUGGUCUUGGGCAUGGGUCCCUGUGCUGACUCUGUGGUGCUGUGCUGCUUGGGUCAGGCAGGUAGUGAAAGAACAGGGGUUCCUCUGGUGCCCCUGCUGAAGCCAGCC
rno-novel-mir-56	chr10:+:12922246:12922353	UCCAGUCCGGCUGCCACCGCAACUUCCGGUUUGCCCCUCUUUCUCGAGCUCGCCAUUCUCGCGAUGAGGAUGCAUUGCUGGGAAGUUGCUGCCCUAUAGUAGGCUUUU
rno-novel-mir-57	chr10:+:13128607:13128714	AAAUAAAACAAAAAACAAAAAAACCAAGCGACUGUGAGGGACUCCGGAGCCCGCAUGCUCCGGCUCUCAUGGCAGCUGGAGCAGUUGUGCCUUUGUUCUGAGCGCCCG
rno-novel-mir-58	chr10:+:13141945:13142052	CGCCGCCUGUUCUCGUCCGCGCGCCCCCGAUGAGACAGCAUUGCGCGAGGCUGAUUCUCGCCUUUGCUCUACCUGGGGCUGAGGAGGCCAUCAUUCCGCGGUCGCCCU
rno-novel-mir-59	chr10:+:13147528:13147639	CCUGUCUCUGCCUCCCAAGUACUGGGAUCAAAGGCAUCAGAUUCCAUUUAGAAGUUUGCAUUGGUACUAGAAUCUCUUUGCCUUUUCUCAGUCUUGUUCGAGAGACCAGCAG
rno-novel-mir-60	chr10:+:13147529:13147639	CUGUCUCUGCCUCCCAAGUACUGGGAUCAAAGGCAUCAGAUUCCAUUUAGAAGUUUGCAUUGGUACUAGAAUCUCUUUGCCUUUUCUCAGUCUUGUUCGAGAGACCAGCAG
rno-novel-mir-61	chr10:+:13168289:13168396	CAUCCCGCAGCCCCUCCCACGCCAUCGCGGCCAUCUUAAGCGAUCUGGAAGAUACUUCCUGUGCGUGGCCGCCAUCUCGGUGUUUGGGCUGUAGGUGGUUAUAUGUUG
rno-novel-mir-62	chr10:+:13854203:13854312	CGCGGGAGCGGACCCAGGCGUCCGGGAGGCGGCUCAGACGCGGCGCGCCACCGGGUGCCCGCCGCCGCCGCCGGCUCCCGCCCCUGGGCCGCCCCCCGCCCGUGACGCGC
rno-novel-mir-63	chr10:+:13854352:13854462	GCCCGAAACCCCAGCCCGAGCCCGAGCCCGAGCCCGAACCCACGGAGGGCGCUGGGCGGCGGGCGGCGGGCGGCGCAGGGAGCGCGGGCUGGAAAGGAUGCGAUCGCAGAC
rno-novel-mir-64	chr10:+:13915011:13915119	GCGCGAAUGCGCGAGCAGGCGGCCAAGGCCCUGAGGUGCGGCCUGCCCCAGAACGCUGAGCAGCUGUCGCACCGCAGACGGGCCACGGCCGCCGCGGCAUCCAGCCCCG
rno-novel-mir-65	chr10:+:13924420:13924527	CUCCCUGGGAGAAGAUGAAGCUGGGCCUUGGGGGAGGACUGGGGCUUCCUCCUUACCAUGCUGGCUUAGCCUGCUAGAGGGAGGAGGCAGCUGGCUCCUGUGAAAUGG
rno-novel-mir-66	chr10:+:14011493:14011605	CAGCUCCCUCCCUCGUCUCCCUGGAGCUAGGGCCCAGGCUGCAAGUACUUCAGGGUUCUCUUGUGGCCUUGUGUUCUCGGCAGGUGGGCUCCGGAGGAGCUGCUAGGAACAGC
rno-novel-mir-67	chr10:+:14011543:14011655	CAGGGUUCUCUUGUGGCCUUGUGUUCUCGGCAGGUGGGCUCCGGAGGAGCUGCUAGGAACAGCCAGAUGGGAGAGUCAGAAUCUGUUUAGUUGAGCUUCAGGAUUUCAGUCUG
rno-novel-mir-68	chr10:+:14088194:14088301	UACUGGGCUCUGAUCUUGCGGCCUGGGCUGUGGGAAUCCGUGGACAUCCGGACGGACACAGCUUUGGCAGCUCCGCGGACCCUGGGGUUCUACUGAUUUGCUUUUUCU
rno-novel-mir-69	chr10:+:14088974:14089083	GAACAGUAGGGCUGUACUUAACUCUCUCACUCUGCAUGGUUACACUAGGCUUUACCCGUGUGACUUUCGUACCGGGAGAGAGAGAAAAGGAGUUCCUCCAGUACUUGGGA
rno-novel-mir-70	chr10:+:14298635:14298745	AGGAAUAAAACCCAGAGCCAGCAGGCGGCAGCCAAGGUCAGGGGACAGCAGGAAUAGGGGCCCAUGUCUCCUGGACUCUGCACAGGCUGGGCUCUGGGUCCAAAUUGGAUG
rno-novel-mir-71	chr10:+:14649627:14649741	UCGGUCCCCAGCUCCGAAAAAAAGAACCAAAAAAAAAAAAUAACUUUUGUUUGUCUUUUUUUUUUUUUUCAGAGCCGGAGACUGAACCCAGGGCCUUGAGCUUGCUAGGCAAGCA
rno-novel-mir-72	chr10:+:14789723:14789831	GUCUUGGGUGUGCCGGGGCGCCAGUGUCCUGGAGCGCGUGGGCGACGUGGGGCGCGAUGCGCGACGCGACACCAAUUGUACUGGGGCAGUCCGGGUGUUCUGGUACGCA
rno-novel-mir-73	chr10:+:14922462:14922570	CCCACUUCCUAAGCUGGGAACUGAGUCUGAGCUGUUACAUGGAUGACCAGCCCUAGUUCCCAGAAAAGAACUCCAUCCAUCCACUCUUGCAGCUAAACUCUAGCUCCCU
rno-novel-mir-74	chr10:+:14937268:14937375	UGCGGACCCCGCCCCACCCUCCGCACCACGUGGGCCAGGCGCCCCGCAGCCUGAUUCCUCAACUGAGGCAAGGUCAGAGGGCUAAGGGUGACUGACUGCCCAGUGCGU
rno-novel-mir-75	chr10:+:15115518:15115627	UACCUCUACUCCCUCGCUGAAAUAGGCCAGUGGAACAUCACAUCCGGAGACACAGUGAUGAUCCUGCUGGCCUCAGACGCGGCUCUGGACAACCAGACAGAGGUGAGGGU
rno-novel-mir-76	chr10:+:15115518:15115628	UACCUCUACUCCCUCGCUGAAAUAGGCCAGUGGAACAUCACAUCCGGAGACACAGUGAUGAUCCUGCUGGCCUCAGACGCGGCUCUGGACAACCAGACAGAGGUGAGGGUG
rno-novel-mir-77	chr10:+:15115609:15115719	ACCAGACAGAGGUGAGGGUGCUAAGGCUGGCAAUGGGGCGGGAGCUGGCUGGUCUGGUUUACCCAGCCCCACUGAGCCUGGCGCUGUCUCCAGGCAGUUCUCCAGAGGUUC
rno-novel-mir-78	chr10:+:15176483:15176590	AGGGAGGAGGCGCCCGCCGGGUUCCCUGCAAAGCGGCCUUAUUUAUCUGGGCACAGCCUCAGCCUCCCCGGUGGGAGGCUCAGGGCGGCAGAUCCUCUCCCACCGGGG
rno-novel-mir-79	chr10:+:15176518:15176628	GCCUUAUUUAUCUGGGCACAGCCUCAGCCUCCCCGGUGGGAGGCUCAGGGCGGCAGAUCCUCUCCCACCGGGGAGCUCCGCUCCGGACUCUGCCGAGAGGGCUCUGGCGCG
rno-novel-mir-80	chr10:+:15176533:15176640	GCACAGCCUCAGCCUCCCCGGUGGGAGGCUCAGGGCGGCAGAUCCUCUCCCACCGGGGAGCUCCGCUCCGGACUCUGCCGAGAGGGCUCUGGCGCGGGGCGCCGGGCG
rno-novel-mir-81	chr10:+:15569632:15569744	GGCUUCCAGGUGGGGCUGAGUUUAGCUCUGCUCUGCUCUGCAGUCUUCCUGGGAUAAGGUCUCUACCUGGGCUUCUUAGUCCCGGGAGGACAUUUUGACUAGCCGUGGUCACU
rno-novel-mir-82	chr10:+:1582555:1582667	UAGCCCUGGUACUACUGGUCAGCCCGACACUGCUAGGCAUCACCAUGGUGAGGGUUGGCUGGUGGGGCUGGCAGCAAGAAAUGGAGGAUGUGGGCUGUGGUGUGGCUGAGUGG
rno-novel-mir-83	chr10:+:16129527:16129634	GAGAGGCUUUUCCCUGGAGAUGGCAAUGGGCACCAGAAAUAGAAACUGUCCCUGUGCCGUAACACUGGGAGGUUGGAGUCUCUAAUAAUCCUUGAUCUAAUGAUCCAC
rno-novel-mir-84	chr10:+:16752434:16752541	ACCAGGAAGAGAGGGCGGAGCGGGGGCUCGGAGACUGCUGCUGAGCGUGGGCGUGGGCCGCUGGGGAUGGCAAGCAGCGAGCUAGCGUUCGCGCGUGAUGUUCUUUUC
rno-novel-mir-85	chr10:+:16752457:16752567	GGGCUCGGAGACUGCUGCUGAGCGUGGGCGUGGGCCGCUGGGGAUGGCAAGCAGCGAGCUAGCGUUCGCGCGUGAUGUUCUUUUCAGAGGCUUCCAUAUUCAGUCUGUCUG
rno-novel-mir-86	chr10:+:16831756:16831864	AUUGGGCUCGGGAGAGUUUGGGGCUGGGAGGAAGGGAGGGAUGGGGGGGUUGCCACUCAGCAUGUCAUGUCUUCCAGACCUCUUAUCCUGGGUCCCUAAUUCAAGGAGA
rno-novel-mir-87	chr10:+:16831806:16831914	UGCCACUCAGCAUGUCAUGUCUUCCAGACCUCUUAUCCUGGGUCCCUAAUUCAAGGAGAGGUCUGAGGGACAGGGUGCUUACCUGAAGAAUACCCCUUCCCACCCUACC
rno-novel-mir-88	chr10:+:1685988:1686098	UCGCAGCAGGUGCUGUAGUAGAGAUGUGGGCAUUAGGGUGCGGAGAGGAGAACCCGCGGGGGGUAGCCCCGUGCUUUGCGUUUCCCAGCCCUGACUCCUGCCUCGGGGCGG
rno-novel-mir-89	chr10:+:16917210:16917317	CGCGCAGCCCAUUGGGCGCCGCCGCCUCCCCUGGCCGCCCCUUCCGCUGCCCGGUUAAAGGGGCCCGAGGGCCGGCCGGAUGGGGAGGCCCGAGAGGUGGGAUGCUAC
rno-novel-mir-90	chr10:+:16970567:16970674	CCUGUGCCGCGCCCGGGACCGCCCCCAAGAGGCCACAUAAAACCGCGCUCCUCCGAACCAGCGCGCAGCAAAGGACUGGCGGGCGGGACGCGCGGUGAAGCCAGAUUA
rno-novel-mir-91	chr10:+:16970567:16970679	CCUGUGCCGCGCCCGGGACCGCCCCCAAGAGGCCACAUAAAACCGCGCUCCUCCGAACCAGCGCGCAGCAAAGGACUGGCGGGCGGGACGCGCGGUGAAGCCAGAUUAGGAUC
rno-novel-mir-92	chr10:+:17137635:17137742	CAGAUGGCAGGAGCCCUGCUGGACUCACCAGUGCUUUACUGUGGCCUGUGAUUAGGUCGGAACCUGGAAUCAGAGAGGUGCCUGAGAGAAGUGGGAGUCUGCUGGGAA
rno-novel-mir-93	chr10:+:17137685:17137792	AUUAGGUCGGAACCUGGAAUCAGAGAGGUGCCUGAGAGAAGUGGGAGUCUGCUGGGAAGCUACCCACCUCCGGGAGGAACCUCCCAAUUCUCCCCUCCUUUCUCAUUU
rno-novel-mir-94	chr10:+:17312501:17312610	GAGGCUAGCCUUGGCUACAUGGGAUCCUGCCUUAAAAGCAGAAUGAGCAGAUUGUGGUGGCACAUGCUGGUAGGAUUUGCUGAAGGAGGAAGAGGCAGGAGGAUCAUGAG
rno-novel-mir-95	chr10:+:17312503:17312610	GGCUAGCCUUGGCUACAUGGGAUCCUGCCUUAAAAGCAGAAUGAGCAGAUUGUGGUGGCACAUGCUGGUAGGAUUUGCUGAAGGAGGAAGAGGCAGGAGGAUCAUGAG
rno-novel-mir-96	chr10:+:17500852:17500962	AGGACCUGCCUUCUGUGGGUGGAGCCUUUUGGAAGUGCUCUUGGUUUGUCCUGGUGAUGCUCAAUGCAGGUCUGACCCUGAGGCUUCUGAGAAGCUCAUUCCUAGAAGGGA
rno-novel-mir-97	chr10:+:20511323:20511432	AACAGCAGAGGCCCAGAGCUCUGAAUGGUGGCUGUAGACAGGUGCUGUGUAUGUUCUCUCUUUGAAGACUGAGGGGGUGGAGAUGGGACAAGGACGUGUCUUCAGGCUGC
rno-novel-mir-98	chr10:+:20511371:20511482	GUAUGUUCUCUCUUUGAAGACUGAGGGGGUGGAGAUGGGACAAGGACGUGUCUUCAGGCUGCCCCGCCUUCCUCCCUCAGGCAUCCCCACGUCUACAGGCCUCUCAGCCUUA
rno-novel-mir-99	chr10:+:20511373:20511482	AUGUUCUCUCUUUGAAGACUGAGGGGGUGGAGAUGGGACAAGGACGUGUCUUCAGGCUGCCCCGCCUUCCUCCCUCAGGCAUCCCCACGUCUACAGGCCUCUCAGCCUUA
rno-novel-mir-100	chr10:+:20591244:20591354	CCACGGAGCGGCGAGGCCCGCGGCCUUCCCCAGCUCGCUCGGUCCCGGCCGCCCCUUGCGGGGUUGCGGGGCCGCCCCGUGGGCCGCCCGUGGCCUCGGGCACCGCCGCCC
rno-novel-mir-101	chr10:+:20658185:20658296	UCCAGGAGACACUGCGAGAGAAGCCCGGAGCAGGACUAGCUGAUGUUGGGGUCAGGAAAGAUGCAUCUCAGGCCAAAGCUACCCUGUGUUUGGACCCUCUGUCUCUCAAGGC
rno-novel-mir-102	chr10:+:20682491:20682602	CCUCCCAAGCGCUGGGAUUAAAGGUGUGUGCCACCACCACCCUGUUACAUGUAGAUUUUAAAAAAGAGUGUAGCUGGGUGUAGUGGCACAUUAUACUAAAAAAAAUCCCAGC
rno-novel-mir-103	chr10:+:2109769:2109879	CACUAUUGGAGGUUCAGCCUUUUUGGAAGAAGUGUGUCACUGGUGUGGGCUUUGUUGUUUCAGAAGCUCAAGCCAGGACCAGUGUCACACUCUCUUCCAGCUGCCUGAUGA
rno-novel-mir-104	chr10:+:2271321:2271430	UUGUGGAGAGUAGGGGCUGAAAGCCUGAGGGUAGCCUGCUGAGUCCUCAGGGCAGGUGCUCAUUCAGGCUCCUUGUUCUCCUAUUCUUGUCAGGCCCUUUUAGGGACAGC
rno-novel-mir-105	chr10:+:26242568:26242679	UUUCUCAUAUUUGGCUGUUUAAUUUAGAAGCAGAGCCAAAUUCUCAUAUACACUACAUAUACUACAUAUAUGAGUGAUUGGCUCUGCUUCUAAAUGAAAAGUUGUUAGCAAC
rno-novel-mir-106	chr10:+:28889711:28889823	AGAAGAAGAGUAACUGCACUGGAUUCCAAAGACUGGGGUGGACCUCUUUCUUAAUGUCCAGUGUCCUUUGUCAUAAGAUUCGGUGCAAUAAGUCUUUAGAAAAAAAAUAUAUA
rno-novel-mir-107	chr10:+:29289147:29289255	GGGAUCCCAGCCGCGCUGCCGCCGCCGCCGCAGCCCGAGUCGGAGGAGGGAGAAACCAGCGAGAAAAUGGCGGCCGUGGCUGCUGAGGCGGCGGCGACCGCGGCGUCCC
rno-novel-mir-108	chr10:+:31001468:31001579	CCACAGCAAUGAUUAAUCAUUUCUGAACAGUGCUGGCCCCACUAGGAAGCUCGUCCUUGCAUGAUCAAUCAUCCCAGGACUGAGUUUUCAGAUGGGGCAGCAUGCUUUGCCC
rno-novel-mir-109	chr10:+:31237177:31237285	UUGAAGACUCCGGAUGCCAUGGAAGGUCCAGAAGGAAGAAGCCUGCUUGGCCACCCUGAAGCUUCUGCAGCCUUCUGGAACCCACCUCAUCCCCAGAAUCUCCCUUCUU
rno-novel-mir-110	chr10:+:31419311:31419419	GCUCCUCCUCUGGCCGCGGUGGCCGGCCCCUUUGCCGCUGCUGCUGUCACACAAAGAGCCGGAAAUGGCUGCGGCGAGGGGCUCCCUGCGCACCCCUGACUUGCAACCU
rno-novel-mir-111	chr10:+:3213637:3213747	UGACUAGAAGUCUAUUUGUGUUGUAGGGUGCAUGGGGAGAGGCCAGCCAGAGGUGGGGCUGAACUUUACCAAGGGGACACAAAGGACUGCAGAGAAGCCAGGUGGGCAGAG
rno-novel-mir-112	chr10:+:34524841:34524950	CGGAGGAGGCCGCUCCAGCGUUGGGUGUUGCCGGUCCGGGGCUAGCCUGGAUCCGGGCAGGGUGAGUUGAGACGAUCGGGUGAGCUGGGCCGGGGACGCCAGCGUCUUCA
rno-novel-mir-113	chr10:+:35667984:35668091	GUGGGAUGUACCAUGGAGACCUCACAGAGAAGCUCAAAGCGCUCUACAAGCUGCACCUGCCCCCAGGUGAGUGACUUUAGACUUUCUGUUGUGAGCAUCUCUGGUCAC
rno-novel-mir-114	chr10:+:35675592:35675699	GGCAACCUCUUCCUCCCUGCACUUGGUUACCUGGAGGACCUGCCUCCUGUACCCAUAGCAUUAGAGCCUUUUGGGUCUGCCCCUGCCUGCUUCUUGCUCCUGCACUCU
rno-novel-mir-115	chr10:+:35716076:35716183	UGAAAGCCUCCAGGCCGCAGCGCGGGGAACAGCACAGCCACCCGGCUCAGCAGCCUCUCGCAGGGCCCCGGGCCAGCCGCGGCUUCCGCCUCCGGCUCCGGGCUGAAG
rno-novel-mir-116	chr10:+:35870620:35870727	UUUGCUCGGAGGGCUUUAUUUAGGCUGCGCAGGCGCUCUCCUAUCAUUUUUCCUCAGCCACGCCGAGGCUUUGUGUGGAGGUGAGUGGUGUUCUGUCUUCGUUUGCUA
rno-novel-mir-117	chr10:+:35870670:35870777	UCCUCAGCCACGCCGAGGCUUUGUGUGGAGGUGAGUGGUGUUCUGUCUUCGUUUGCUACCAGAGCCCUCCACGGACGCCUAUUUUGGUGACGAUUGCUUGUCGCUGAA
rno-novel-mir-118	chr10:+:37084889:37084998	UAGGUCUUAAAUGUACAGACUGGGCUAGGGGGAGCUGAGGCAGGAGGAGCGCCGGGAGUUCCAGGCCAGUCUAGACCACAAAGUGACACUCUGGCUCAGAAAAUAAACAA
rno-novel-mir-119	chr10:+:3737945:3738054	GUGGCCAACCUGCUGUUUGGUUGGGAGGUGUGGAUGGCAGGACCGUGUGCUUGUGUGUCCCGAGCAGGGCAGGGCUGUCACUGACCACACCAGAAUGUGAAUGACAGUGG
rno-novel-mir-120	chr10:+:37616477:37616586	AAGAGUUUCUAGAAUGUGGCAAGGAACCAUGUCCACCACAAAGAGGUUUUAUGGGCUCCUUGCUUUAAUUGGAACAGAUCUCUACCUUCAGCCCCACAGAGAAACUGAAG
rno-novel-mir-121	chr10:+:38782813:38782922	CCUUAUAGGUGCAUGGGGCGUGGAUUAGGAUGAUGGGCGGGGCUUAGGAGCUUCUGGCCGUUCCAAGAGGCUGUCCUUUCUGCUCAGUACUAGGCCUUUGAAUAACAGAG
rno-novel-mir-122	chr10:+:38877429:38877542	GGAUCCAUUCAGCCGCAGCCGCCCCGGCGGAGCGCGUCCCGCAGCCGGCUCGUCCCUCCCGCGGCCCCGGCGCUCCCCGCAACCCGCCCGCCCGGUGCGCAGCUCGCCAUGGCG
rno-novel-mir-123	chr10:+:38899708:38899818	CAGCCAUUUUUUUCUGGCAAGCCUCAGAGUCGAAACUGGGGUUAAAGACUAGCGUCCUUAGUGUUGGCCCAGCUCCAGCCUGGGCUCUGGGCUCCCUGAGAAGAUACACUU
rno-novel-mir-124	chr10:+:39103385:39103492	AGCGUGCAGGCGUGGGAGAAUAUAGGCGUAGGGUUAGACUGUAGGCAGCCACCUGGGCGGCCCAGCUGGGAGGCCCUGCGGUUCUCCGCUCGCCUGCUUCCCUCCCUU
rno-novel-mir-125	chr10:+:39103741:39103850	CCAUCUAGCCCUGCCCUGGGUCACGGCCUCUGGGCCUAGCCUCACAGUCUCCUCCGCUCGGCUCUCCAGGCCCCACAGGGCGGAUGGGAACUGAGGCCUCUUUCCUUCCA
rno-novel-mir-126	chr10:+:3955405:3955517	GAAGGAACUGAGAACACUGUGUGUGCCCAGGUCUGUGGGCAGCGCACUGGGAGGUCCUGCAGCAAAGGGGACCUCCUUACUGUGCUGCCUUUUACCAAAUAUUUUUACCUAAU
rno-novel-mir-127	chr10:+:39692935:39693047	UCCUCUGCUGGCCAGAUGGACCCUCUUCCUGGAGGGAGCAUCUAGAAGAUAACCGGGCCCCGCUUCACUGCUGUCUCCUGCUUGUGCUCCUCAGAUCUUCCACCAGGCAGACA
rno-novel-mir-128	chr10:+:40939534:40939641	GGCAUAGUGUGAGCAGGCUGAAGCUGGGUGACAGAGCUUAGAACUGUCCAUCCUUGUCCUUUCUCUUCUGUUCACCUCUCUUUCUCUGCAUUCAUUGCUCCUUGUGAA
rno-novel-mir-129	chr10:+:42667502:42667611	ACUGGAAUGAAGAUGAUAAAUUUGUCCCCGCAGCCACCGACGCUCAGGCUGGAGGGGACAACUCAAGCGUCCAGAAUAGGACCUACAUCGUCACUACUAUCCUCGUGAGU
rno-novel-mir-130	chr10:+:42708547:42708656	UACGUGAGGUUUCCUGUUCCUUCAACAGAUAUUGGGACUGUAUUGGGUUGUAAAAGUUGAUGAAGGAAUAGGAACUCUGCUAACGGCUUUGUCGUUGGGUGUGGUCACAA
rno-novel-mir-131	chr10:+:42716635:42716743	CGGCGGCGUCUGGUGGUUCUUCACUUUGAUCAUCAUCUCCUCGUACACAGCCAACCUGGCUGCCUUCCUGACUGUGGAGAGGAUGGUGUCUCCCAUUGAGAGUGCAGAG
rno-novel-mir-132	chr10:+:42894468:42894577	GGACUAUGUCUCCGUCUGGCUGCAGGGCGUCCUGGAGCAAAGUCAGAGUCUCUGCUAUCACAAUCUCAGGCAGCCUCUCCUCUGCUCCUCAGUGCUCUGUCAGAGGUCUC
rno-novel-mir-133	chr10:+:42932634:42932742	CGUUCCCACCGCUUUUACCCUGAGACAGGCGGUGCGACUGGCACGGCUGACUAGCUGAGAGCCCGGCCUGGGGUCAGCGCUGCAGCCUGUCCGUGCGGCGAGGAACCCC
rno-novel-mir-134	chr10:+:43056638:43056746	GCUGAGCUGUGGGACUGGACUGGGGAGGCUGGGGAGGGACACUUCACCACCCCUUUUCUAGGCAUGAGAAGGUUCCGGAAUGUGUAGAGGCUGGGCCUGCUUUGCUAAU
rno-novel-mir-135	chr10:+:43126343:43126455	GUCUGACAGGGAAAGUUUGGACGAAAGAGAGAAGUCCAGGCUCUGAGACAGGUAUAAGAUGCUCAGAUCAUCUGACCCAUCUCCUGAACCUCUCAGUCAGCCUGGGAUUCUGA
rno-novel-mir-136	chr10:+:43384457:43384566	CCCUUGGAGUAGCAAUGGAGACAAACCUGGGACAGACGGGUGGGUAAAGUGACCAUCGCUCUGGCUGUCACCGGCUGUUUCAUGAUCUUCAUCUGGUCAGUGAGGUGCCA
rno-novel-mir-137	chr10:+:43645513:43645624	GAGGCAGGACUUAAGCUUGGAAGUUGAAGAGUUGCGUUAAGGGCCAGGGUGCAGCAGUGUCUGAGUGGGAACCCAGGAACUCAGGCUGCCCUUCAGAAGCUCCAGGCUCUUC
rno-novel-mir-138	chr10:+:4375301:4375412	CACCCUCUGCCUUCCGGUUCCGGGUUUGGGGGCUUCGCGUGCGCAGGCAUUCUGACUCCUGAAUUCCACACGAGGCGGCAUGAAGUGCUUAGCGUCCGAGUCUCCCGAUGCC
rno-novel-mir-139	chr10:+:43768599:43768706	AUAGCGUUGUUACGUGAUGGCGUAUUUCCGUUUCCUCUCCGCCAGGGCGUUUUUUGGUUGGACCGUCUUGUUGCAGAGGGAGGGGGAAGAUUGUUUGCUCCGUGGAUG
rno-novel-mir-140	chr10:+:4447211:4447322	CACCCUCUGCCUUCCGGUUCCGGGUUUGGGGGCUUCGCGUGCGCAGGCAUUCUGACUCCUGAAUUCCACACGAGGCGGCAUGAAGUGCUUAGCGUCCGAGUCUCCCGAUGCC
rno-novel-mir-141	chr10:+:4487818:4487929	CACCCUCUGCCUUCCGGUUCCGGGUUUGGGGGCUUCGCGUGCGCAGGCAUUCUGACUCCUGAAUUCCACACGAGGCGGCAUGAAGUGCUUAGCGUCCGAGUCUCCCGAUGCC
rno-novel-mir-142	chr10:+:45512417:45512524	UGGACAAGCCAAGUUGCAGAGAAGACAAGACUGCCAGUCGUCUGACAGCUGAGGCAACAGCUGAGCAGUUCGGCAACAGCCUGGGCAGUAAGAAAGAUGGCAGAUAAA
rno-novel-mir-143	chr10:+:45514734:45514841	GUGGAGUUGCCGCGGAAAAGGCCGGAACCACGGACUGGGCAGUGUCUCGUGGUCCCGCUCGGCCGCCACUGCCAUGCCGGGCUUUUGCGCCCCGCAGCCGCUCCCCGA
rno-novel-mir-144	chr10:+:45899379:45899486	UCCUCUUCCUCAUGGACGGCUUUGAUGAGCUGCAGGGGGCCUUUGAUGAGCACAUCGAGGAGGUCUGCACAGACUGGCAGAAGGCUGUGAGGGGAGACAUUCUGCUAA
rno-novel-mir-145	chr10:+:45899429:45899536	CACAUCGAGGAGGUCUGCACAGACUGGCAGAAGGCUGUGAGGGGAGACAUUCUGCUAAGCAGCCUCAUCCGAAAGAAGUUGCUGCCUAAGGCCUCUCUGCUUAUUACG
rno-novel-mir-146	chr10:+:46172598:46172710	CCUGGGAAGGAGGAGGGGGUACAGAGCGAAGAAGGACCGCGCAUGUGCGCGGCUCAGUCUUCGCCUGAGCCAGACCUAUCUUUGCAAACUAGCUUCCAAAACAGUUCAUGGGU
rno-novel-mir-147	chr10:+:46216920:46217027	CUUGGGCGAGGAGCGGGGCGAUGCUCAGGCUGCGCGGCUGCUGCGCGCGUCCCCGCGGUGCCCCGCUACGAGCUGAGCGGAGCCGGGCGAGCAGCCGCGCCCUGCGGG
rno-novel-mir-148	chr10:+:46217057:46217166	GACUUUGAGGGCGGCUUCCUCCGGAAGUUCCGCGCGCGCUUCCCGGACCUGCCCUUCGUGGCGCUGGAGGACCGGCGGGGCUUCUGGGUGUCGGAGCAGUACGGACGUCU
rno-novel-mir-149	chr10:+:46217107:46217216	GCCCUUCGUGGCGCUGGAGGACCGGCGGGGCUUCUGGGUGUCGGAGCAGUACGGACGUCUGCAGCCUGGGCUGAGCGUGAGCACCUGCCGGCCCUGCAGCGGUCCCCCGC
rno-novel-mir-150	chr10:+:46217114:46217224	GUGGCGCUGGAGGACCGGCGGGGCUUCUGGGUGUCGGAGCAGUACGGACGUCUGCAGCCUGGGCUGAGCGUGAGCACCUGCCGGCCCUGCAGCGGUCCCCCGCGGGAGGGG
rno-novel-mir-151	chr10:+:46325860:46325968	GGAUACAGGUCCAAACGCCUAUGCUAGCUGCUGGGAGGGUGUUCUGCUCUUCCUGCUCCCAUGGCUAUAGUGUUUCUACCCAUGCUUUUAAGAAAGCACAGUAGAUGGA
rno-novel-mir-152	chr10:+:46807233:46807344	CUGUUACAGGUAUCAGUCCCUCAACCUGACCCAUGUUCCUGAACACAGUGCACCCAUCUAUGAGUUCCGGUGACAGUGGUUCAGAACAGUGGCCAAAUAAAACUGAACUUGG
rno-novel-mir-153	chr10:+:46897351:46897458	AAUGAAUGUGGACGGGAGGUGCUGGUGUUGUGGGGCUGGUAGAAGACACUGGGGCCUAGGAACUGGGGCUAGCCUGCCAAGGGCGGCCAUUGCAUCAGAGGAAAGGCC
rno-novel-mir-154	chr10:+:46954916:46955023	CCCUCUUCUACGUGGUACCCUCCUAGAUCCCCAGCAAGCCCAUCUCAGGCUGUCACUGAAAGGGCCUGCCUGCCCUGCGGGCUGGAGUAGCCUGGGUUUGCUCACCUU
rno-novel-mir-155	chr10:+:46954966:46955073	UGUCACUGAAAGGGCCUGCCUGCCCUGCGGGCUGGAGUAGCCUGGGUUUGCUCACCUUAGUGAUCACCAUCUGUCCGUCGGGCAGUCUUGCCAAGCCCCUUAACACUG
rno-novel-mir-156	chr10:+:48438061:48438174	GGAACACUUACCUAGUGGCUGAGGUAACAUGGAUUCUGUCAUUCUCAGGAGGAAACUGAGGAAUGGAGGCGGUUCCAGGCAGACCUGCAGACUGCAGUGGUAGUGGCCAACGAC
rno-novel-mir-157	chr10:+:4853800:4853907	UCUGGCAGGAUUGGGGCAGCCUGAGACUGUGUGUGCUUGAGUGACACCAACAUCCCUGGUCCACAGCCAGCACUACAGACAGACAUGGCCCCGAUGCCACCUUAACCC
rno-novel-mir-158	chr10:+:48540015:48540126	UGCAGCAGCACUGAUUCUCAAACUAUAGUAGCCUCUUGGGGCCACAGACUCCACAUUCAGGCUCUAUCUGUAGUUCUUGGCUGUGGCUCCAUCCAGUUCCCCCUGGGACUCC
rno-novel-mir-159	chr10:+:48881482:48881591	CCCUGCACCUGGUCCUCCGCCUGAGGGGCGGCAUGCAGAUCUUCGUGAAGACCCUGACCGGCAAGACCAUCACCCUGGAGGUGGAGCCCAGUGACACCAUCGAGAACGUG
rno-novel-mir-160	chr10:+:52328103:52328210	CUCUUCCUGGGCUUGAAGCGUUGCGGCUUGGGAGCCUUGGAGGAACCAGAUCUGUAAACUUUUAGUACUUUCCAGGGCUGUCAGGAAGGUCAGCAAUAGCAGGAGCAA
rno-novel-mir-161	chr10:+:53037754:53037861	GGACGCGAGCGACAGCAGCAGCGACAGCAGCAGAGGCGACAGCAGGAGGCGGCGCAGCGCCAUGGCGGGGCCGGGCGGGAGGGCGCGGGCGGACGCGGGCUGCAGGCC
rno-novel-mir-162	chr10:+:53037804:53037911	GGCGCAGCGCCAUGGCGGGGCCGGGCGGGAGGGCGCGGGCGGACGCGGGCUGCAGGCCGCUGCCCGGGAGGCUGGCCGGGCUCCGAGGGCCGCCGCGCGGGCUGGGAG
rno-novel-mir-163	chr10:+:54219305:54219415	AGAAGAAUAUGCAAAGAACCUUGCUAAGCUCUCUCAGAACUCCUUGGCUGCCCAGGAGGAAGGGUGAGUUGGGAGGAGAGUGGAGGGGGUGGAGGAGGAGAGGACACAGAA
rno-novel-mir-164	chr10:+:55445040:55445147	UCUGGGGUUUCCGGAAGCUGUGCUGUUGGCGAGAGUAGUUCCCUACGCUAAGAGGAAGGCAAGUAUGAAGGCGUAAGGGAACUCAAGAAGGAGACAGGAAAUAUGCGC
rno-novel-mir-165	chr10:+:55576902:55577013	CCAAGCCUAUUCCACAGCAUCUGGAAAGUGAGUGUGAAAAGCGGCACUCACAGGAGCUUAGAGUCUGACCUGUAGGCACCUCACACUCACUUGUUCAGGAGGCAAGUGCCCC
rno-novel-mir-166	chr10:+:55617589:55617701	CUUGGGGAGGAUUUAGAAGGAGGGUUUGAGGAUGUGUGGUGCAAAGCCAAAGCAUCUGUUUAUGUCCAGCUCUGGCUUUCGCGCUACCUUCCUAUUCAACACAUCCAGAAGUA
rno-novel-mir-167	chr10:+:55678121:55678235	UCCAUAGGUUGCAUCUUUGUAUCCCUUGGGAGCCUCUAAGACUGGUCCUACUUGGUCCUAAGAAUCCCAAGGUUUUCUGGGAGCUUCCAACAUGUUGAUUAGCAUAUCAUUUGCA
rno-novel-mir-168	chr10:+:55678582:55678692	CCCUACAUUCCUGCUCCCCAGUUUUCGUGUGGGGCAUUCAGCUGACAUUCCCGGGGGUCUCCCUCCCUCCCAUCUGCCUGAUCUGCUGCCUCCUCCCACCAGGAGAACUGG
rno-novel-mir-169	chr10:+:55678754:55678862	UGCCUUGGGGAGGAGUGGGACAAAACAGAACCCCCCCUAAUUCCUGCCUGAAAUCUCUGGCCUCAUCCUUGCUAGAGGUUGGACUGAAAACUUUCCUCCCCAAUCCUGG
rno-novel-mir-170	chr10:+:55697468:55697575	ACGGUAAAAUCUGCAGGGGUCGAGGGCCUUGUUAGCCAGCUAUAGCUCUACAGGCCAAGGGCCGCACGCGGCUGUGAUGGCCGAGUGGUUAAGGCGUUGGACUCGAAA
rno-novel-mir-171	chr10:+:55710317:55710424	AGGUCACCCGAAUGAAACGUAGUACUCGAAAAGCUCUGAGCUAGAUGACAGUCAGGGCGAUGCGGGUGCUAGCAAACAGAGAGGGAGAGUGAUGAAAUUUGAGCUCCC
rno-novel-mir-172	chr10:+:55935440:55935547	CUCAUCCUGCCUUGAUCCUGACAGGAGUGCAGCAUAGAACGAAGUUCCAAGAGAGCCACUGAGCAGCCUGCUGCUCACCGACUGGCUCAGCAACCAUCCGCAGACUAA
rno-novel-mir-173	chr10:+:55935490:55935597	GAGAGCCACUGAGCAGCCUGCUGCUCACCGACUGGCUCAGCAACCAUCCGCAGACUAAUGAGUGCUCACAGCCACCCCUCUAAUCUCCCACUCAUUCUUGAAGACCGA
rno-novel-mir-174	chr10:+:56110075:56110182	AGUGUGUCCACAGACAAGAGGAACCAUUGUCACGCUUGGAGCUCCUGUCUCGGGAGAGCAGCCUCCAAGGAAGAGGAUGAUCCCAGAAUAGGAGCACCCCAGGAGGAG
rno-novel-mir-175	chr10:+:56256722:56256832	GAUGCCUCAUUCGCUGGGAAAACCAGGGUUGGAUUCCGUGGGAACCAUGGGGACCCCCGAGUUCUGAAGGUCUUGAUCCUGUCUUUCCUAGUGACUGUGGCUGACUACAUC
rno-novel-mir-176	chr10:+:56256722:56256833	GAUGCCUCAUUCGCUGGGAAAACCAGGGUUGGAUUCCGUGGGAACCAUGGGGACCCCCGAGUUCUGAAGGUCUUGAUCCUGUCUUUCCUAGUGACUGUGGCUGACUACAUCU
rno-novel-mir-177	chr10:+:56286756:56286868	GGUGAUCCAGUGGGCUUCCCAGCGCGUGGCCAGGAAGUCAGAGACCCUGCAGGGACUGGACUGAGGCUAGGCGCUUGGGAGGCGGAGGCGGGACGUUACGUUUUUGUAUUUUG
rno-novel-mir-178	chr10:+:56652238:56652348	AUGAGAGAAGUUGCAACUUAGCCUACCAGGAAGGAGGUAGAGAGGCAGAGAGGACCCUACCCCUCAUGUCUGUGUCUUUCUCCCUCUUGACAGAGAGAUCAAUAAGCGGAU
rno-novel-mir-179	chr10:+:57201000:57201108	AGAUGAUGGUGAGCGUGAGCUGGAGUUGGAGGUGAUCGUGAGCGUGAAGACUGUGGUUGCCACAAGCACUUCCAACUGCAGAGCCACGCUCUGCUGUGGCUCCCACUUA
rno-novel-mir-180	chr10:+:57201001:57201112	GAUGAUGGUGAGCGUGAGCUGGAGUUGGAGGUGAUCGUGAGCGUGAAGACUGUGGUUGCCACAAGCACUUCCAACUGCAGAGCCACGCUCUGCUGUGGCUCCCACUUAAGAA
rno-novel-mir-181	chr10:+:57296013:57296124	AAGCCAGCUCUCACCAGUGUCUGGGCUCGAAGACUGUGGAGAUAGAGCGAGUGGGUGCUCAACUGAAAGCUCCUGUCUCUGUAGUUCUUCAAGGCAGCGGGCAAGGCGCACA
rno-novel-mir-182	chr10:+:57308747:57308854	UAGGGUUGGGAUAAGGAACCCACUCUAGAGUGCAGGUGCGCAGCUCUGGCUAGGCAAUUUGCCAGGGUGCAGAGCUGGAGCCGGAUGAGACUGCGGGCCUGAGAGUGG
rno-novel-mir-183	chr10:+:57328611:57328723	CCCUGUCACAAUGUCCUGAUAUCUGGGAAGGAGAGAAGCAAGAUAGACAGCAAGGUUCUCCUGAACCUGCCUUCCUUACUUUUACCCUUCCUUGCCCAGGUACGCAGACCGCA
rno-novel-mir-184	chr10:+:57328612:57328723	CCUGUCACAAUGUCCUGAUAUCUGGGAAGGAGAGAAGCAAGAUAGACAGCAAGGUUCUCCUGAACCUGCCUUCCUUACUUUUACCCUUCCUUGCCCAGGUACGCAGACCGCA
rno-novel-mir-185	chr10:+:5740021:5740130	GAUAGAGGGAGAUCAGAGCGAGUGGAGCAAGGGCUGUGAGAGGCUGGAUGCGAGUGGAGAGGGUUUGGGUAGUUUUGUUUGGCUUUGCUUCUCUCCCUGGGUGGCUGAAA
rno-novel-mir-186	chr10:+:5740071:5740180	CGAGUGGAGAGGGUUUGGGUAGUUUUGUUUGGCUUUGCUUCUCUCCCUGGGUGGCUGAAAUUAAGUCAAAGCUCAAGUUGGUCCCUUUCCCUCACCUUGAUGAGCGUGAG
rno-novel-mir-187	chr10:+:57661002:57661110	AUGCUUCUGUGUAAACCUGGUCUGGGUAUUUAUUGAGUAUAACCAUGAAGUACAUUAGAGCAGAAAAGCUAGGCUGAGGCAUAGCUGAGUGGUAGAGUAUGCUUGGCAU
rno-novel-mir-188	chr10:+:58332614:58332721	UGAUGCCUCCUCUCAUCCUGUUCUCAGCGUCCAGGAGCAUCUCGGCUGUCAGUCCUGGGUGAGAACUAGGUCUACUGCUGUUCCUGGAAGAGCAGGGUAGAUGCUGUG
rno-novel-mir-189	chr10:+:58342300:58342407	AACCAGUAUCAUCCUCACAUCACAGAUGGAGCUGAAGCCCAGAGAGGUUCAGCAAUUUCUCCUGGGUCACACAGCUGGCCAGCAGCAGAAGUGGGAUCUGAAACCUUU
rno-novel-mir-190	chr10:+:58764042:58764149	CAGUUCCCUGCACCGAGCAGGAACUGGGUGCUCCCCUCGGUCAGUAAACUGAGUGAUAAACACUUGCAAGGCCCGGAUGGCUGCUCGAUGAGCGGCUGCCAGCCUAGA
rno-novel-mir-191	chr10:+:58764092:58764199	GAGUGAUAAACACUUGCAAGGCCCGGAUGGCUGCUCGAUGAGCGGCUGCCAGCCUAGACAUUGCCCAUGACUGGCAACAAACAAGAAGCAAGGGGUUACUUCAAGUUC
rno-novel-mir-192	chr10:+:59173257:59173368	GCAGUGGCGGGGGAAGGCACCGGUGGGGCCGACGGGCGGGCUGAGGAGGGAAGCGGGCGAGCGAAGUCCCAGUGCGCGCCGCGGCGGCCCGGGUACCCUCCCCUUCCGGGCG
rno-novel-mir-193	chr10:+:59173268:59173376	GGAAGGCACCGGUGGGGCCGACGGGCGGGCUGAGGAGGGAAGCGGGCGAGCGAAGUCCCAGUGCGCGCCGCGGCGGCCCGGGUACCCUCCCCUUCCGGGCGUGAGCCGC
rno-novel-mir-194	chr10:+:59173268:59173377	GGAAGGCACCGGUGGGGCCGACGGGCGGGCUGAGGAGGGAAGCGGGCGAGCGAAGUCCCAGUGCGCGCCGCGGCGGCCCGGGUACCCUCCCCUUCCGGGCGUGAGCCGCU
rno-novel-mir-195	chr10:+:59432615:59432722	CUGACUCAUUUGUCUUUCUAGUUGGAUGUGGAGACCUGGCAGCAGGAGCAACCUGUGGUAUUGCAUACCUGGACCAAGGAAUCCACCCACAACUAUGAAAAUAACUGC
rno-novel-mir-196	chr10:+:59442845:59442953	ACAACAAGACUCACUUUUUGUUCAUGUGGCUUCAGAAUGUGGGGAGAGUGGUUGUGUUCUGGGCAUCCCUGACUUAAACUCUGUCUCCAGUAUUGUGAAGGUUCUUUCU
rno-novel-mir-197	chr10:+:59606336:59606450	AGCCCAGAGCUUCCCGGAGUCCAGGAAGAUGAGGCUGCAUCCUGAGUCCCUGCAUGUGCCCAGGGCCAUCGGCAGCAUGCUCAUUCCGCUCCUCCAGAGGCCCACCGCCCUCAUG
rno-novel-mir-198	chr10:+:6033403:6033516	CUAAAAAUAAGACGUGCAUGUAGCCAAGAACACAACCUUCCAAGAGUAACUUUCUGUGAUCUUGGGAUUUUUCUUGGCAGCAAUUCAACCAACGAAGGGAUGAAUGUGAAGAAA
rno-novel-mir-199	chr10:+:6118320:6118428	AUAAUCUCAGUAACUAUGUGUUUCAAGGACAGCAUCCUCUCACUCUCAAUGAGUCCAACCCUAACACAGUAGAGGUGGCUGUCAGCACUGAAUCCAAAGGGAACUCCCG
rno-novel-mir-200	chr10:+:61450757:61450867	GUGCUGAUGAGUGAGCGGGUGGUGGGCAUUGAGCACCCCAACACCAUCCAGGAAUAUGUGAGUAGCCAUGCUGGGGUUGGCGUGUAGGUGUGGGUGCCCGAGGCUACCCUG
rno-novel-mir-201	chr10:+:61693186:61693297	GCCUCGCUUGCGGGCCGAGGGGCCCGGACAGAGGCUGUGCAAUGUCUUGUAGCUUAUUUCCGUGAUGAUUUUACUGACUUUAGGCUUGGGCGUGAUUCACUUGUUUUUAACC
rno-novel-mir-202	chr10:+:62015175:62015282	AUGUAUCUGCGGAGGUGGCAAGAGAUGUGCUCAGAGAGGCGGCCUGCUAGGCUGCUGCGCAUCUUCCUCAGCCACAGCAGCAGAUCCACGGAGUGUCUGACGAUCCUC
rno-novel-mir-203	chr10:+:62955185:62955292	CUCCGGGGUCAGCCCUCGAGGCCUGUUGCCGCUGAUGCUCGGUCUGUUCCGGCUGAGCGACGUGUGGCGAGAUGGAAAAGGGAACCUGGAAGCCAGCCAGCUGAGGGU
rno-novel-mir-204	chr10:+:63098062:63098176	UGUGCACGUCGGCGUUAGCGUCACGUCCGCGUCGACCACGUCCAGCGGAGACGGGAACAAGAUGGCGAUUCCGGGCAGGCAGUGAGUGAUGUGGGAGUUAGGGUCAGGCUGGGGA
rno-novel-mir-205	chr10:+:63672180:63672292	UGGGUGACAGGUAAGUGGCACCGGGGGUCAGGGUCAGGAGUCGAGGGCUAAGAUGGGACAAGGCUUCCCAUCAAGGCCUACGUCUGACCCGGAACCCCUGCAGUUUCUCACCA
rno-novel-mir-206	chr10:+:63855567:63855674	AACAUUUCUGUAUGUUCGUGCCGCCAUCCCCAGUGUGGGUGUGUGCUCCACACUGACACUUAACUCUAGUAUUGGGAGUAUGGUGGACGUUCAAAGUACUGUGGCCUG
rno-novel-mir-207	chr10:+:64133475:64133586	AGACAGCCCAAAUUAAAUGUUUUUCUUCAGAAGAGAUGCCGUGGUCAUGGCGUCUCUACACAGCACUAGAAACCCUGACUAAGACAUGCUCUUAAAAUGGAUGAACUUGGGG
rno-novel-mir-208	chr10:+:64598313:64598423	ACUUCAAAGGCCUCCUGAGCACAGCCCUGGGCUCUGAGCGGCCCACUCACUGGCCUGGUCAGCUGGCAGCAGGAACGUUUGUGUUUCUUUUAAUAUCAACUCCCAGGCAUU
rno-novel-mir-209	chr10:+:65042831:65042938	CCCCUGGUCCCCUCCCUCUCCCAGGCCCCUCCCGCUGCAGCUGCCCAGCCCAGCCAGAGCUGUGGAGACAGCAGAGGCUAAAGGACUGCGGGGACCAGGUAUGUCAGA
rno-novel-mir-210	chr10:+:65517399:65517507	AUGGCCCAGCCAAGUCAGAACAACUACUGGAAGGCCAUGGAAGGCAUUUUCAUGAAGCCCAGUGAGUUGCUGAGGGCAGAGGUCCAUCAUGCAGAGCUGUGACUCUAAA
rno-novel-mir-211	chr10:+:65586479:65586586	GCUCUGCGGCAUCUGCUGCUGCCUUAUUUACUCCAGCUUGGACUGAGCUACUGUCUGUUGCUAACCAGACCAAAGUGAGCUGUGCCUGUGGCUCCGGCCGCUGACUGA
rno-novel-mir-212	chr10:+:65588492:65588599	AGUGAUCGCACACCCUCGGCACUGGCCAUACUGGAGAAUGCCAAUGUGCUGGCCCGCUAUGCCAGCAUCUGCCAGCAGGUGUGUGCUGGGGUUUGGGUGCUUAGAUGA
rno-novel-mir-213	chr10:+:66942897:66943004	CUUAGCUGCACCUACCCAACCUAGAAAAGAGGGGAAUGUCUGCUCCGGGCCACCCUGGAUUCUGGUCCAGUUCCUUCCUGGUGACCUCCCACUCAAGCUAGAUGGGCA
rno-novel-mir-214	chr10:+:67045983:67046094	CAGAGCUCACGAUGCCUUUGUUCUGUUGUCACAGGAGAAUCACAAACUGCGGGAUCAGAAUGAUGACUUGAACGGGCAGAUCCUGAGCCUCAGCCUCUAUGAGGCAAAGAAC
rno-novel-mir-215	chr10:+:67325120:67325231	GGGUAGGGUGAGCGGCCUCCGAAGCGGAGCGGGGCUCGGAGGAGACACUUUUUUUUCCUCCCUCCUUCCCUCCUCUCCUCCUCCCUUCCCUUCCCCUCUCCUCCCCUCUCUC
rno-novel-mir-216	chr10:+:67811422:67811531	GGUAAGAUGGCGGCCGCAGCGGUGGUAGAGUUCCAGAGAGCUCAGUCUCUACUCAGCACUGACCGGGAGGCCUCCAUCGACAUCCUCCACUCCAUCGGUAAAGGUCCUGG
rno-novel-mir-217	chr10:+:67862908:67863016	UGUCCUGCUGACCUGUCUGUACCUCUCCUAUUCCUACAUGGGCAAUGAAAUCUCCUACCCGCUCAAGCCCUUCCUGGUGGAGAGCUGCAAGGAAGCCUUUUGGGACCGU
rno-novel-mir-218	chr10:+:68474108:68474215	AGCUGCUGGAAAAACGCCGCUCUGUGUCAAGUCCAUGAGCCACGCAGAGCAUGCUGGGCUCCCUCUGGUGUGGAAGGAAACAAGGGGUGUUUUUAACAGGAUUCCUCC
rno-novel-mir-219	chr10:+:68519042:68519149	GCACAGAUGUGGUCGGUUGUACCGGCUUGCAGAAGAGAUGGAGAGUAGUAAAAAUACUGUGUUUAUGUGCAAGCCGUGUGCAAAGAAAUGUGAGGGGAUGCCUGGGCG
rno-novel-mir-220	chr10:+:70117859:70117966	AGAACAGGAAUGAGAGAUAGGAAACCGGGUGUCUAGGUGUCGCAGCAUUGCUCAUAGGCUUUUACUGAUCAGCAUUAGAGGGAGCCGCGACACCCCGCACACCCUAGC
rno-novel-mir-221	chr10:+:70134784:70134892	UGUGGGCUCCUGGUCCGGUGGCCGGUGCGGAGCGUCAGAGCCAGGGCAGCCGAGAAGGCAGGUGAGGGGCAGCGCGGCGGGCCGCGGUGCGCCGUGUGGGGAGGGCCGG
rno-novel-mir-222	chr10:+:70148144:70148252	GGGGUCAAAGCAUGAUCUUGGACUCUGAAGUGCUCCUGAUUGAUAACAACACAGGCAAACCACUGCCCUUUGGGACCCUGGGAGUACACAAGGUAUACCCUAAGAGUCC
rno-novel-mir-223	chr10:+:71323077:71323184	CAGGUGAGGAAUUGGUGAGAUUGCUCUGGUGAUGGUCAUAUAGAUAUCAGAGAUGACUCUGGGUAUUGUCUGAUUGACAGACCAAGGCUCUGUCCAUUACCUCCUCAG
rno-novel-mir-224	chr10:+:71616718:71616830	AUGUCUUCAGCUGUUCCAAAAGUACUUGGAAAGCGUCAGUGUGGCAGAGACCCCGUUGAGCUCUGUGUGAGAGGGAGCGAGCCUGUUGACAGCCUCAUGUUCAGCACUGCUGG
rno-novel-mir-225	chr10:+:71616768:71616880	CCCCGUUGAGCUCUGUGUGAGAGGGAGCGAGCCUGUUGACAGCCUCAUGUUCAGCACUGCUGGCAACAUCUUGCUGAGCUCUCAUUACAGUUGCGGCUUUCAGAGGAGAAACC
rno-novel-mir-226	chr10:+:7240873:7240983	UGCUUUCGCUCACAAGAGGCACAGCUGUCACCUCCUUGGAUUGCUCAUUUGGCCAGCCAGAGUGGGGACAGCUCUGCGCUUUGGUGUCAGGAAUCCCUCCUGUAAAGAAUU
rno-novel-mir-227	chr10:+:72438772:72438880	AUUCCCAGCAACCACAUGAUGUUUCACAACUGUCUGUAACUCCAGUCCCAGGGGAUCAACACCCUAUAUGGUCUUCAUGGGCACUGGGCACACACAUAGUUCAAAGACA
rno-novel-mir-228	chr10:+:72852448:72852558	UGGCACACUGUUGCCUAGGCUAGCAUUGGAACCCGGGCACAAAAGAAGUAUCCCUCCUGCCCGGGCUCCCAUGUAGCUGGGCCGGCAGGCAUCCCCACCUCUCGUCACCAG
rno-novel-mir-229	chr10:+:73236632:73236741	UGCCCUACCCUUCACUUUCCUGAGGUGGGAACUGAAGACAGCUUCCUUGUCUCUCCCCGGGCCUGGGAAAGUACUCGGUGAAGGGCACAGGCUCGAGGGUGCAGCAGGUA
rno-novel-mir-230	chr10:+:73346649:73346759	GCUGUCUGCUUCUUGGCAGGAUGGUUGCUGGGAAGGCUGAGCCAGCCAUGCCAGGGAGGCUCUAUGUCCACCCGGAUUCUCCUGCCACUGGGGCCCACUGGAUGCGGCAGU
rno-novel-mir-231	chr10:+:73807426:73807535	CCAGGCGAGGGCGUGGCCCGGCGAAGGCGGGCCGCGCGUGACGACGUCUAGGGAACGCGCGCGCCGCCGCGGGGCCAGGCCGAGCGCUGCUGGUGCUGGUGGCGUCCGAG
rno-novel-mir-232	chr10:+:73880198:73880308	CCCAGCGGGGCCUGCAGUCACUGGGGCUGGCCUUGCUGGUUUAGCUUUUUCAGAGCAGAAAUCUCCCUGUUCCCUCUGCUGUUAGAAAAGUCUAUCUUGCUCUCAGGAUUU
rno-novel-mir-233	chr10:+:74436253:74436363	UGGGCCUGGGCUCCCACGCGGACGCUGGCCGGCUACUGAGGCGGGAGGAAGGCGCUGCGGCUACCGCUAGUCCUUCCCUCUCCGCCCCAGGGCUGGCGCGCGGAUAAAAAU
rno-novel-mir-234	chr10:+:74436303:74436413	GGCGCUGCGGCUACCGCUAGUCCUUCCCUCUCCGCCCCAGGGCUGGCGCGCGGAUAAAAAUGGCGAAAUGGUGGGUAGCCGGUGGGAAACCUGACGGGAUGGGGCGCGGAG
rno-novel-mir-235	chr10:+:74871518:74871627	GCCACCAGCGGACCGCACUCUUGCAAGGCUAGUGGGGGCCCCGCGGUGCAACGAGGUCCGCGCGCAGCUCGCACCAAGGGUGGCUGGGGCGCUGUCCAGGAGGAGCUGGC
rno-novel-mir-236	chr10:+:75054107:75054214	CCUUCGUGCCCACUAUCUCAUUUGGGGAGCUCCGGGACCGAGAGGGACCCCUGCAGUCCCUCGAGCUGAGACUAGCUGAGGCAGAGACUAUGAGGCAAGCGGCUCAUC
rno-novel-mir-237	chr10:+:75057660:75057773	GCGUAGAGAACGGGACUUGCUGGAGGUGAUCGGGGGCCAGGAACGAGCUGGGACUGACUCGACUCCUGGUCGCCCCACCCCAGGAAGGUCCCCAGUGGCUGCAUAUGCGGGACU
rno-novel-mir-238	chr10:+:75057660:75057774	GCGUAGAGAACGGGACUUGCUGGAGGUGAUCGGGGGCCAGGAACGAGCUGGGACUGACUCGACUCCUGGUCGCCCCACCCCAGGAAGGUCCCCAGUGGCUGCAUAUGCGGGACUU
rno-novel-mir-239	chr10:+:75366174:75366286	UUCCCUCCCGCCCUGAAGGGGAAGGGAGGAGGCCGGCCGCUGUCACCACCGGGCGGCCCAGAGAAAAGAGGGCGCCGGGCCGCUGGGUAGCGCGGGCCGCUCGGCCACUGCGC
rno-novel-mir-240	chr10:+:75687121:75687229	UACAAUGGAUAGAGAGGGACACUGGACUUGGAGUCAGAAGACCUUAGUUUGACUCUGGCUCUACCCUGACACUAGCUUGUGUCCUUAUCUGUGACACAUGAGUAAUAUG
rno-novel-mir-241	chr10:+:75687121:75687230	UACAAUGGAUAGAGAGGGACACUGGACUUGGAGUCAGAAGACCUUAGUUUGACUCUGGCUCUACCCUGACACUAGCUUGUGUCCUUAUCUGUGACACAUGAGUAAUAUGC
rno-novel-mir-242	chr10:+:76317747:76317857	GGUGCCCCUCCGGGUCCUCUGGGUUGAGUGUCCUGGUUUGUGGUCCAGAGCAGGGACAGAGACAAUAGGAAAUGGCCCUGCUCUGGCAGUUCUCAAAUCUCAGAUUCCCAG
rno-novel-mir-243	chr10:+:77755199:77755306	UCCCUCCCGCCCCCAGGCGCCUGCUCUGGCCCGGGCCCUGUGCUGACCGACCCCCGGCGUGGCCCACUCCGGCUCUGCCCAGUUGCGUGGCUCCCGCCUGGCACGCCG
rno-novel-mir-244	chr10:+:77755571:77755678	UUGCCUCCUCCAUCCGGCGCCUGCUCUGGCCCGGGCCCUGUGCUGACCGACCCCCGGCGUGGCCCACUCCGGCUCUGCCCAGUUGCGUGGCUCCCGCCUGGCACGCCG
rno-novel-mir-245	chr10:+:77858073:77858180	CACACAGCAAGAGGGAAGGCCCUGGGCAGGUCUGGAGCCUGAACCUCUCUCCUGCCAUGCCCUUGGCUCCUGUUUCCUCUAGUGCCAGCCUUGCUAAGCCUGUGAGAC
rno-novel-mir-246	chr10:+:77911941:77912051	UUCUGUGUACACAGCCUUCAUCACAGCUCAGUCCCCGGACUCAGAAGGGAAAAGAAACCCUUCUCAAUUCUCAGCUGAAUCUGGGCCUUAAAGUGGCAGGCACCCACACAA
rno-novel-mir-247	chr10:+:81450743:81450850	UGAGGCUGCUUGCUCGUGUCAAUGGAGCAAGAUCCCUAAAAUAUAAAACACGGGUCUCUUGCUGCAGCAACGCGAGUGGGAGUACCUGGAGCGCGAGCUCGGAACGAG
rno-novel-mir-248	chr10:+:81587528:81587636	GCUAGCAGGCCUUCCUCACCCGCGAGCUCCGCAGUCGCCGCAGCAGCGCGUCCUCGUCAUCCUCGACGUCGCCGAAGACAAGCUGCUCCAGGCAGCGCUCAGCAGCCGG
rno-novel-mir-249	chr10:+:81653714:81653821	GCCAGUCGUCUCUGUCCCCGCCCAAAAGCCCGCGGUGCACGCCCUCGCCUUGCAGGGCUUUGUACGGAGGGCUGUGAGGCAGGAAGUGAUUUCUCCCCCACCCAAGUC
rno-novel-mir-250	chr10:+:81808977:81809084	CGUGGUGCAUGACAAAGUCUGGUGUGGCUAUAGGAACAAAAUCUAUGUGGUUCAGCCAAAGGCUAUGAAGAUAGAGGCAAGUUAACCUCUAUUUUGUGUACAUACUGA
rno-novel-mir-251	chr10:+:81849990:81850097	CAGUGGAAAUCACGAGGAGGCUGGGGACCACAGGACACCGCCGGUCCUGCGUCUCCAGCCGCCCGGCUCCGCCCGCGUCGCCCCCGCCUCCAGCAGCCCGGCGCUGCC
rno-novel-mir-252	chr10:+:82027983:82028094	GUUACAGUCCUAGCACUGGGCAGGCAGAGUCAGGUGGAUUUUGGUGAAUUGAAGAGAUCCACCUGCUUCUGCCUCUUGAGUUCUAGGAUUAAAGAUUGAAAGUCUCAGUCCU
rno-novel-mir-253	chr10:+:82193540:82193650	AAUGGCCCCAUCCCACUAACUACCCUGUUUCCCUAUGCGCCCCCAGCUCCGGUGUGUGGGUGUGUGGGGAAAGAGGGUUCCAAAUGAACUGAAAACUGAAGCCUGCCCAAA
rno-novel-mir-254	chr10:+:82327167:82327276	AGAGGAGAGGCAGUAAGGACCUACGAGUCUGAUGGGUGAGCCUCUCUGUUCUCAGGGGCGGAGGACAGAGGAGCUAGUUCGGCCAGAGGCUAAGAGUCAGCUUUAGUUCA
rno-novel-mir-255	chr10:+:82327754:82327862	AAGCUACUCCCUCUUUGAUCUCCGGAGUGACCAGAGAUCUCUCUGGUAGCUUUUUGGAGAGAAUCUGUGUCCCGUUGGAGAGCAAGAGGAGAGAUUUUGAAAAGCUGGU
rno-novel-mir-256	chr10:+:82750346:82750453	CACCGUUUCCCAGUGUGGGGGCUAGGGGGGCAUUGCCAUAAUGGCUUUUUCUCUCUCUGCAGGGGGAAGCUGGUAAGCCUGGCCGCCCUGGUGAGCGUGGACCUCCUG
rno-novel-mir-257	chr10:+:82751957:82752064	UGAGCCCGGACCCCCUGGCCCUGCUGGUGCUGCUGGUCCUGCUGUAAGUGUCCUCUCUGCUGCUGACCCCAGUGCCACUUGCCAGUUUCACCAUUCUAGGCUGUCACU
rno-novel-mir-258	chr10:+:82756144:82756251	UAGGGUGAUGCUGGUCCCAAAGGUGCUGAUGGUUCUCCUGGCAAAGAUGGCGUCCGUGGUCUGACUGGUCCCAUUGGUCCUCCUGGCCCUGCUGGUGCCCCUGGUGAC
rno-novel-mir-259	chr10:+:82757766:82757880	CGUGGUGUGGUCGGUCUUCCCGGUCAGAGAGGAGAAAGAGGCUUCCCUGGUCUUCCUGGACCCUCUGUGAGUGUUCCUUCAUCUUGGGGUCUCCAAGAAGAAUGGUCCUAGGACU
rno-novel-mir-260	chr10:+:83201479:83201586	UACGAGCCGGCGGUCGCACGCAGCUCCUAUGAGGUCCCUGCCGCCGGCCGGCGAUGUCCGCCUGGAGCUUUCGCCUUCGCCGCCGGUACCGCUACCUGUUCUGAACGG
rno-novel-mir-261	chr10:+:83487871:83487982	CCAACUCACUGGCCACCGCCGGGGAUGGCCUGAUCGAGCUGCGAAAGCUGGAAGCUGCUGAGGACAUUGCUUAUCAGCUCUCCCGCUCUCGGAACAUCACCUACCUGCCAGC
rno-novel-mir-262	chr10:+:83806669:83806776	GGAAAGGGUAGUCACCAAAGCUCUUCUCUUACAAGCUCCAUCUAGAGCGGGUAGAGGAGUAAAGGUGAUUGGAGAGGUGCUAGCUGGAGGAAGAGCGUCAGCCUCGGA
rno-novel-mir-263	chr10:+:83856204:83856312	AGGGCGACUUCCGGCGCGCUCCGAUGACGCACGGCACCCGGCUUCCGUGUUGGGAGCUGGCUACAGAACCUGGGACGCGGAGAGCUGGGGUUGGGGCAGCGGGGCGGCC
rno-novel-mir-264	chr10:+:84976352:84976459	UUUCACUGAUGCCCCACAAUCCUUAGCUACUUCCGCCUCCGGACAACCCUCAUGGGAACUUCCUGUAAGGAUGGCUGCGGCGGUGGCUUGCAUACUCCGAGGAGGUCU
rno-novel-mir-265	chr10:+:85390733:85390845	CGACGCAGCAAGUCCCCUCCACACCCAUCCUCCCUCCUCCUACCGCCAGGCAGCCGAAAGAGAGCCGAGCCGGGUGGGGGAGAGAGGGAGCCUCAGGGAGGGCUGGCUGAGGG
rno-novel-mir-266	chr10:+:85424007:85424115	GAAACACCUUGGCUAACUCCGGGUGGGGGUUUUGUUGACAUUUCCACACCACAGUGGUUAUCAAAAGAAGUCAGAGCAAGAGCCCAGGUUCUGGAGCUGAAGCCAGGAG
rno-novel-mir-267	chr10:+:85610142:85610256	GGUAGCAGUGCCAUGCUCAGAUCUUGGGUCUAGGAGGAAGGAGGCGGGGGCUGCUGUGCUUUGUGCUACACCCUUCUGACCUCCCUCUCCUCAGUGCCCAGAUGGCAGGCCUGCU
rno-novel-mir-268	chr10:+:85610192:85610306	CUGCUGUGCUUUGUGCUACACCCUUCUGACCUCCCUCUCCUCAGUGCCCAGAUGGCAGGCCUGCUGUGUGAGGAGGAAGUGCUGGAGGUGGACAACGUCAAGUACUGCGGCUACU
rno-novel-mir-269	chr10:+:85758305:85758416	CCCAGGGUUGGGGGCUGUGUGUGUGUGGGGAGGGGGGACUGGGCUGACCCAUCAGGAGUAAUGUAGUCCUUGUGGUGCCCUUCCUCUGCCUGGGACUGGGCGUAGCGGCUCG
rno-novel-mir-270	chr10:+:86309043:86309154	AGCUUACCCACAGGCAGUGGGAAGAGGUAGAUUGGGAGCUGGGGCAGGGCGGGGCAUUGAGCACACACAAUGCACCCUCUGUUCCUGUUCCUGAGUUGGCAGGAGUGCGUGG
rno-novel-mir-271	chr10:+:86338397:86338507	GAAGCUCAGAGAGGCUGAGAUGACUGCGACCGAGCAGACUCUGAUGUGUCUGCCUGGGCUGGGCACUUCCUGCCUAGGACGAUGGGGGAGAGCUGCUGGCCAAGGCUGCUU
rno-novel-mir-272	chr10:+:86672792:86672902	AUGACUGAGAAAGGUAGAGUUGGGUGGGUACAGUAUAGGAGUUGCUCCACUGGGGUCCGCCCUAUGCCCACUGCUUCUAUCCUUUCCCCUCCCAGGGUAUAUCCCUAGUUA
rno-novel-mir-273	chr10:+:86672792:86672903	AUGACUGAGAAAGGUAGAGUUGGGUGGGUACAGUAUAGGAGUUGCUCCACUGGGGUCCGCCCUAUGCCCACUGCUUCUAUCCUUUCCCCUCCCAGGGUAUAUCCCUAGUUAC
rno-novel-mir-274	chr10:+:86724464:86724573	AGCUUCCCGGCAGCCUCUGCGACGGGCGUGGUGCGUAAGGAGCUGACCAGCGGUGGCCGUUCUCCGUAAGAUGGCGGACCGGCGGCGGCAGCGCGCUUCCCAGGACACUG
rno-novel-mir-275	chr10:+:86814814:86814926	CUGAUCACUUGAAAAUAAUCUGUAGGCUGAAUGCUUCUGGAGUGUGGGAGAAAUGUGACUCCAGGGUCCUUCGUUCUCUGAGGCUCUGGGGGUGGAGUGUAGGGCCUGAGAAG
rno-novel-mir-276	chr10:+:86815012:86815120	GCUUUCUUUCCCUGUGACUCUCAGUCUCUAGCUAUGUGGUCUGGGGAACUCUGUUAAACCACCCAAAUUUAGGGAAUGAGAGGGAAGAAAGGAGGCCAUUAUAACUCUG
rno-novel-mir-277	chr10:+:8687600:8687711	CCCCUGGAAUCAGCCUCUCCUGGACAGCCCCAAGCCGCGAGGCUAAACCAGAGAAUCCAUCGCAGCUGUUAGACUAAAAUGCCAACUCGAGGUGAAUUCGAGGGGCCUUCUU
rno-novel-mir-278	chr10:+:87147839:87147948	CUGGCCUGCAGGGAGUUUUCAAGGCCCCUUUCCUGUUGACAGACAUCCUCAGCAGUGAACCAGCAACAGGACAAGGGCUUCUGAAAUCUCAUUUGCAAUGUUUUCCGCCG
rno-novel-mir-279	chr10:+:87502085:87502192	UGCGGUUUGAGAUUUCUAAUGCGUCUGUAUGAUGUGAUGGUGGAACUCAGCAGUUACACCUCACACCUGCUGGCUCUACUCUCUGUCAAGUACAGAUGUAUCCCUCAC
rno-novel-mir-280	chr10:+:88227966:88228073	CGGCUUCCGGUCGGUUGCAUCAGCCGGGUGGGGCGCUGCCUGCCCACUAGGUCUCCGGCACGUGAUCAGCUGUGGAGGGAGGGCGGGCCUAGAGCAGAAAGCCCGUGC
rno-novel-mir-281	chr10:+:88228016:88228123	GUCUCCGGCACGUGAUCAGCUGUGGAGGGAGGGCGGGCCUAGAGCAGAAAGCCCGUGCUCUGUCUAGCUCUAGUACUGGCCUGUUCCCGGAGGGACAACAAAGAGCAC
rno-novel-mir-282	chr10:+:88389513:88389624	ACUAGGAUAGCUUGGAAGUCAGAGAUCUACCUUGCCUCUGCCGACCUGUGCCAAUCCCAGCACUUGGUAGGCAGAGGCAGGCUAAUCUCCCUGAGUUCAAGGACCUAGUCUC
rno-novel-mir-283	chr10:+:88443024:88443134	GGGAGGGGCCGUGGGCCGGCCCUAGGAUGGGGAGAUGGGCGGGGCAGCUCUAGGAGGAGAACCUACGAGGCUGGGGGCUGUGGCCUGAUCGCUUCAGGGGCUGGGCCGGCC
rno-novel-mir-284	chr10:+:88497067:88497174	CAGCCCAUCUUGCCUCCGUGGUGCCUCUGGGCCUCCUCUAAAGGAUGGUGGUGGGUACCAAGAGCCAACGGAGGGGGCCCUGAGCCAGCAAGAGUAAGCCCCAUCUGC
rno-novel-mir-285	chr10:+:88788232:88788345	GUCCUCGCACAUGUGGUAGCCUAACUGAUGAACCCCUCUAAAGGGAGAUUGGGGCUAACCUUAGUAACCCUUUAUACGUUAGUGAAUAUGGGCUGCGGAUUUUGUGACCGCUCA
rno-novel-mir-286	chr10:+:88979412:88979521	CGGUUGGCAUCAUGGGAGCCGCGGGGCUGGCGGCGAUUCUGGGGUUCUUACUCCUGGCCCGGGACUUGGUGGGUGAUGAGGCUCAGGAGGCAGAGGCUGUACGGGAGCUG
rno-novel-mir-287	chr10:+:88979462:88979571	CUCCUGGCCCGGGACUUGGUGGGUGAUGAGGCUCAGGAGGCAGAGGCUGUACGGGAGCUGGUGGUCCGGCUACUGGGACCCGGGCCGGCGGCCGAUUUCUUGGUGUCCGU
rno-novel-mir-288	chr10:+:89029998:89030105	CGCUUUCUCUAGCUAACAAGAGGCACUCUGGCUUACUGCGAGCGACUUGGGAUGUUACCAGAAGCUCGUGGAGAGUGUCCGGGGCGAGAGUGGGGGCGCGGGGAAAGC
rno-novel-mir-289	chr10:+:89189935:89190042	CUUGUCCAUUCCACGGUCUGGCCCUGGCAGUGACUUUUCUCCUGGGGACAGGUAUGUUCUGGUUUCAGUCAGAUGGCAGGGUGAGACACAGAAUGUUCUGGGUUUAUC
rno-novel-mir-290	chr10:+:89379631:89379741	ACACCAUUGUUCCCCUGUGCACUCCUGGACUUUCUGACCUCCUGAUCCUGGCCGGAAGGGCAGGGCAGGCAGAGGAGCAAUUCUGGUUGGAGGAAGCUACUUCCUUAUCCC
rno-novel-mir-291	chr10:+:89455667:89455775	GUCCGCCAUGUUAGAUUCACCCCGCAGGGAUAGCAGCCGAGCUGGCCGCGAACGAUUCUUGCACUGGCCACUGGCAAGCGCCCCCCGUGGGCGGAAAGCUGGUAAGGAA
rno-novel-mir-292	chr10:+:89473375:89473484	CCAGUGAGAGGGAGCUCUACAUUCCAUCCGUGGACCUUCUGACUGCCCAGGUAAACACCGUUUUGAGGGACAAGGGCAGAAAGAGGAGUACUGAGGAAAGAGCUUGCACC
rno-novel-mir-293	chr10:+:89562602:89562713	ACCGCCACCCUCUUUCAUCUAGUGGCCUCGCGUCUCUCCUGAGAUGAGAUCCAGGAAGGAGGCGAGGCCCCGGGGAAGAGGCGGACCGAGCCUUNNNNNNNNNNNNNNNNNN
rno-novel-mir-294	chr10:+:89562602:89562715	ACCGCCACCCUCUUUCAUCUAGUGGCCUCGCGUCUCUCCUGAGAUGAGAUCCAGGAAGGAGGCGAGGCCCCGGGGAAGAGGCGGACCGAGCCUUNNNNNNNNNNNNNNNNNNNN
rno-novel-mir-295	chr10:+:89562604:89562716	CGCCACCCUCUUUCAUCUAGUGGCCUCGCGUCUCUCCUGAGAUGAGAUCCAGGAAGGAGGCGAGGCCCCGGGGAAGAGGCGGACCGAGCCUUNNNNNNNNNNNNNNNNNNNNN
rno-novel-mir-296	chr10:+:89914983:89915093	GCCACUACAGACAAACCCAAUAACCUGUUCCUCAGCAAGCAGGCUCCCGAGACUGCCAAGCUCCCUGGCUUCCUGGGUAGUUGGGGUAGGAAGGACUGGGCCAGGUUCCUU
rno-novel-mir-297	chr10:+:90096117:90096226	AGGCAACUUCCGGUCCCUUACUGUUUUUCUUUUCGUCCGGAAACAAAGCUCUCGCUCUCUAGUUCCGGGCGAGAAAAAAAAAUGUGGAGGAGUCAGCCUUUCUAAACUCU
rno-novel-mir-298	chr10:+:90116014:90116126	CAGGAGGACCAAGAGUUCAAGGCCAGUGUUGGCUCCAAAGAGGUGUGUGCGGGUGUGGCACACAACUGCCUAUGCUGACCUUGAACUUUAAGUCUUCCUGCCUUAACCUCCAG
rno-novel-mir-299	chr10:+:90139608:90139715	AAGAAACCAGGCCACAGGUCUAAGACCCACAUCCUGGGCACAAGUCUUUAGUGCUUAGGCCAGAGAGGAGAGGGGCCUGCAGGAUGGCAAGGGGGACAGAGAGGAAGG
rno-novel-mir-300	chr10:+:90242915:90243023	AAAGAGAGCGCCGGCUCCCAGCCGAGCCUGGGACGCCUUCCGGCCCAGGCAUCCCCGCCCUUCCCGCGGGGCUCCCAGCUCUGCUCCCCGGCCGCUCCCCACUUUGACC
rno-novel-mir-301	chr10:+:90264312:90264424	GGCGGCGAGAGCGACCUCGCCAGCCCCGCGGGGGAACUAGCAGGCUUGGCUGGCGCGGGAGGGAGGGCCGAGGUGCGGCGGUGGAGAGGGUGCCCAGCGAGCCUCGCGGGUGC
rno-novel-mir-302	chr10:+:90264362:90264474	UGGCGCGGGAGGGAGGGCCGAGGUGCGGCGGUGGAGAGGGUGCCCAGCGAGCCUCGCGGGUGCCGGCAGCCCUGCUCUGGAGCUCUCUUCCAAGCUCUCCCUGCUUAAACUCC
rno-novel-mir-303	chr10:+:90357329:90357440	ACUACCUUCUCCGCCCCCCCAGGCCCGGACUGGUUGCGAACGGUGCUGGAGCCGCCCAGCCAGCCCGGCCAGCACGUGGAUUCCAAGGGGCCAACCAUAAUUUUUCCCGGAG
rno-novel-mir-304	chr10:+:90416668:90416779	GUGUGUCUGAAGACAGUGACAGUGUACUCAUAUACAUGAAAUAAAUGAAUCUUUAAAAAAAAUAUUUAUGUCUGUGAGUACACUGUCCUUCUUUUCAGACACACCAGAAGAG
rno-novel-mir-305	chr10:+:904685:904796	GUCUCUUCCUCCCCCUCGGCCCCAGGAGCUGCUCCGCCAAGCCCAAGAGGUGCCCGGCGGGAGGAGCUGCAGGAGGCGCGGGCCACUUGGCCCAUCGGGCGGGCGUGGAGAG
rno-novel-mir-306	chr10:+:90740935:90741044	UCCCAGCCCCCUUUGGAUGCAGGGAACCAGGUAAGAGAGGGGAAGGGGGCGGGGCUGGACAGCUAGGCCCCUCUCACCUCCCGCUCUCCACAGGCUGCCUGUUUGCAGUC
rno-novel-mir-307	chr10:+:90740935:90741046	UCCCAGCCCCCUUUGGAUGCAGGGAACCAGGUAAGAGAGGGGAAGGGGGCGGGGCUGGACAGCUAGGCCCCUCUCACCUCCCGCUCUCCACAGGCUGCCUGUUUGCAGUCCC
rno-novel-mir-308	chr10:+:90998686:90998794	AUAGUGCCCAGUGACUGAAGCACCUGCCUGCUUGUACCCUGGCUACCCACACACAGCCUCCCUCAGCUUGGUGGAAGUACCCAGAAUGCUCAGCUCUCUCUGGGAAUCU
rno-novel-mir-309	chr10:+:91201085:91201193	CUGGGACUUUAACCCCUUGUGGGCUCUGCGGCAGGGGAUUUAACCCUUUGUGGAUUCGGCCCCUCCGUGGCAGCGUCAUCGGGUAGUUUUAACCCUUUCGGGGUUGGGU
rno-novel-mir-310	chr10:+:91253652:91253763	UCAGGGCGGAGAGCUGCGGUUCUAGGACCCGGAGGCGCCGGGCGAGCGCGCCGCCGUGUUCUCGGCCUCGCCUGGGUCGGCUCCGGGGCUCCGGCAGGUGCAGCGGCGCCAG
rno-novel-mir-311	chr10:+:91253702:91253813	CCGCCGUGUUCUCGGCCUCGCCUGGGUCGGCUCCGGGGCUCCGGCAGGUGCAGCGGCGCCAGCCCCCUCCGCCGCAGGUGCACUGCUCGGCAGCCCCCGGCCGGCGCGCCAU
rno-novel-mir-312	chr10:+:91710267:91710378	GGCCGGAGGGCAGGAGCUGCCUGGACGCUCUGACCCUUUCCAGCGGAGUUUGCGCAAACUGCACGCUGGGAGGGGUUCGUGUCCCCGCAGCUUGGGCGCCGCGAGUGGGUUG
rno-novel-mir-313	chr10:+:91712255:91712362	GAGAAAUCCCUCUUCCCAUAGGCUUUUUGACCUAUGUGCACCCUCUUAGUGAGUCUUGGGCAUAGAGUACUUGGAAAGGUUUCUGGGGAAACGGAGCUCAGGUCCCUC
rno-novel-mir-314	chr10:+:92062468:92062575	UGGCCUUUGACUUAUUAUUUCGGAAGGAGGAAACUGGGCUUCUUGGCUGAUUCUCCUGAGGGAAGUGCCUGAAUCUAGACCUUGCUGGAGGCAGGAAAAGGCCAGGCU
rno-novel-mir-315	chr10:+:92383376:92383490	GAAGGGCAGCCCAUGGGAGAAGGGGUAUUGGGCAGAAGGAAGGUAGGCCAGAAGGUGGCACCUUGUAGAUUGGUUCUCUGAAGGCUGACCUUGCCAUCCCAGGGCACUGGCUCCC
rno-novel-mir-316	chr10:+:92386118:92386228	CUACACUACUAGCAGUGGGUAAGACCACUUCCUUUGUCCUUGUCUGUUCUCCAGAAAAGUGGGCAUGGAGGCGGUGUUAAUAACUAUAGGUCUGUGGCUUUAUGAGCCUUC
rno-novel-mir-317	chr10:+:92394922:92395035	AAAAAAAGAAAGAAAAAGGGGUUGGGGAUUUAGCUCAGUGGUAAGCGCUUGCCUAGCAAGUGCAAGGCCCUGGGUUCGGUCCCCAGCUCCAUUAGCCCGCUAUCCAAAACAACA
rno-novel-mir-318	chr10:+:92394923:92395034	AAAAAAGAAAGAAAAAGGGGUUGGGGAUUUAGCUCAGUGGUAAGCGCUUGCCUAGCAAGUGCAAGGCCCUGGGUUCGGUCCCCAGCUCCAUUAGCCCGCUAUCCAAAACAAC
rno-novel-mir-319	chr10:+:92518801:92518909	GUGGACGUCCGUCAGAGCUAUGGGGCGGGAUGGGGAGGGGGGGAGAGAUGCUGGUGCCUUGGCGUCUCUGUCUCUGUAUCUCUCUGUCUCUGUCUCGGCCCUAGGAAAG
rno-novel-mir-320	chr10:+:93577542:93577653	GGCUUAGUCUCAUACCCGGGAAUGGGGUAAAGGAGGCGGGGCCUAGACUGAGUCCUGCCCCCUUUCCCCUUAGACCCCUCGCUGAGCCCAUCCCCGGCAGCAGCACUCCCUG
rno-novel-mir-321	chr10:+:93680956:93681067	GCGGGGUGGGUGGCUGGGGGAACUACCAGUGUGCAAAACCGUCUAGACUCCAGUUAAAUCUGUUCCUUUUAGGUAGAAACGAACUGGAGCUGGGGUCAGCCUGAAGAAGAGA
rno-novel-mir-322	chr10:+:93825665:93825775	UGUGCACCAGGGCCUGGACAUCCCAAUGGAAAGAUCAGACCUUAGAAUUCAGCUCUGCUCUGUUCUUUCCCAUCGGGUGUACAGCAGCACCUGGAUACCCCAAGGGAAGAA
rno-novel-mir-323	chr10:+:94127084:94127194	GCUGACUGGGAAGCUGGCCUCUGGUGAGCCAGGACUUCCAUUUCUCAGUUCUGUGCCCCAGCCACAUGCUCUCUCCCUCUCUUCCAACACCAAUGAGGAGAUUUUGUGCCG
rno-novel-mir-324	chr10:+:94171069:94171176	CCCGGGCGGGGGCGGGGCGCAGCAGGGCGCAGCAGCCAAUCACAGGCCUGCGGACAGUCGCCUGGGGAGGGCAGCAGGCGCCAGGGGCCCCCAGCCUCAGCCCUGAGC
rno-novel-mir-325	chr10:+:94171119:94171226	CGGACAGUCGCCUGGGGAGGGCAGCAGGCGCCAGGGGCCCCCAGCCUCAGCCCUGAGCAGUGAGGUCCCUGAUGGGACCCCUGCCGUAGGCCAGACCCUCCCACCCGC
rno-novel-mir-326	chr10:+:94407547:94407654	CUCGCGCCCUUCUCAGCGCGCAUGUCAGAUGCACUCCCCCACCCCACCCCCAGUCAGCAACGGGCCGUGAGGCGGCGGCGAAGGGGGCGGAGGAAGAGUGCGGCUGGA
rno-novel-mir-327	chr10:+:94461032:94461141	GCCUCAAACAAGCACCGCCCAUAACUGACGGCCUCAGAGCCCCGCCCUCUGGGACCGCCUUUUCCCGGAGGAGCGGGAGCGGAAGCUGCACGCGGAAGCGCUGAGAGAGG
rno-novel-mir-328	chr10:+:94696941:94697052	CCGGGGGUUAAGCUGCAGCGCUAUAGCAUUUUGCUGGCGCAUAACUGGGGCCGCCUGCCUAUCGCGGGCGGCCCUUUUAACCGCUAGCUACAGGCUAAAACCAGCUUACUAC
rno-novel-mir-329	chr10:+:94696945:94697055	GGGUUAAGCUGCAGCGCUAUAGCAUUUUGCUGGCGCAUAACUGGGGCCGCCUGCCUAUCGCGGGCGGCCCUUUUAACCGCUAGCUACAGGCUAAAACCAGCUUACUACAUG
rno-novel-mir-330	chr10:+:95202106:95202216	GAGCCUAGUACUUGUAAAGGAGCCAAGGCUCACAGAUCCAUCUCUGGUAACACACAACAAAAAUCAAGCUGUGGGACUAGUGAGGAUCUGAGGCAGAGGUAGUACAAUCAG
rno-novel-mir-331	chr10:+:95240739:95240847	GGUGGGGGGGAGGAAGCGAGCCAAAGCCCUCGCUGCGUUUUCUAGCCCGGGGAACCCUGUCUACAAAAAUGACAGCUCGAGCCCUCUGGCUUCUCUGUUUGAUCGUCGG
rno-novel-mir-332	chr10:+:95706760:95706867	AGGCUUCCGACACACUGCCUGAGUGGAUCCGCAGGCGGCUUCCGGUGCGAGUGACGAGUGGUGGCCGAACUUGGGGGACAGCAGGGGACUCUUAGGCAAGGACCAUGG
rno-novel-mir-333	chr10:+:95912517:95912624	GUGCAGCCUGGGCUGCAGCCUGGUGGGUUUUGGGCUCUGCUUCCUGGUUUCUAGUUGACUUUGAAUUUACUGAGUUACUAGGAAGAAAACAAAUCCAUUUCUAAGGUA
rno-novel-mir-334	chr10:+:95912518:95912626	UGCAGCCUGGGCUGCAGCCUGGUGGGUUUUGGGCUCUGCUUCCUGGUUUCUAGUUGACUUUGAAUUUACUGAGUUACUAGGAAGAAAACAAAUCCAUUUCUAAGGUAGU
rno-novel-mir-335	chr10:+:95960685:95960792	GUCUCAAAGUCUCUCGCUACACAGCAGAGGAGGACCUUGGCCUCCUGGUCCUCCUGCUUCUACCUUGUGAGUGUUGAUAUUAUUAAUCUGAACAGUCCUACAGGGCUC
rno-novel-mir-336	chr10:+:96160434:96160545	AUCAGGCAAAUGUCUGAGGACAGGCAGGUGUGUAGAUGGAUGAGUGCUACUGGUAUGUAGGUGCUGGAGACUGGGGACAUUCUGCAAUACACAGGUCAGCCUGCUUGUCACC
rno-novel-mir-337	chr10:+:96352:96460	GCUCUGCGUUCGGCCAGCGCUCGGCUCGACUCGGCUCUUUCCGUCAACGCGCGGCCGCGGUCCCGGAAGGGCGCCCAUGGAGCGGGGUCUGCCGGGCGAACGCCAGAGU
rno-novel-mir-338	chr10:+:97238077:97238184	GUCUUCUCUUAAGGUAUUACUUCAAGAAGGCGAGUGACGAAUUUGCCUGUGGAGCAGUCUUUGAGGAGAUCUGGGAUGAUGAGACAGUGCUCCCCAUGUACGAAGGCA
rno-novel-mir-339	chr10:+:97406193:97406306	CUGGGGAGCUGACCAGUUCUCUGAUCACUGUGGCGGGGAGAACGAGCUUCCCCCAGCUGCAGAGCAGAAAGCAGAGUGCAGCCAGCCACUCUUGGGAGUGGAUGGAUGUCUGAC
rno-novel-mir-340	chr10:+:97573935:97574042	AUCACACUCGCCCGGGGAACAUUGUGAGGGAGUCAGCACACUGGGAUUCCAAUCAAUUUUUCUCAGGCUUCCCCCCCCCAUAAAUCCCUCUGAGGGGUCUCCCCAGAC
rno-novel-mir-341	chr10:+:98308337:98308449	UUUGCUUUUAAACCAGAAGGAGGUGAAUCAGAGAGCUGCAUCAUCAAAAAGGGUCCUCUCCACCCACAGCUCUGGGCUUCUGACUCCUUCUCUUAAGAUUUUCAAUCUUAUUU
rno-novel-mir-342	chr10:+:98390878:98390989	AUCUGAGGAUAUGUUUGGUAGAGGCAUAGUAUGGUGCAGGGGAAGGAGAUUCCUCUGCAAACCAGUGCUGAGGCAUCCCCUCCCCCUGAGGUAUCAGCCUUAGUGUAGUGUA
rno-novel-mir-343	chr10:+:98978617:98978727	AAUAGCACACGGCUGUAGCACAGUCAUACCAUCAUUUCACAUCACUCUUCUCAUUCUGAACCUUUUAAAAUGAAUUUGUGAUGUGUAGUGAUGGACUGUCUUGUAUAUGGU
rno-novel-mir-344	chr10:-:102168369:102168476	GUUCACCUAUUAAAAGGGGGAGGGCCUGACGGCUGAGGCUACCCUCCCCCAAUUCUCCAGGCUCGGGAGCAGGGUUGGGUAAAGAAUGAAUGACUUUGACAGGAAGGA
rno-novel-mir-345	chr10:-:102267321:102267428	CUGGAAGCUCCUAUCCAUGCUGGGGAGCUGCUACGGUGCGGAGUGUGGGAGGACCAUGUGCUACCAGCUCUGAUCAGCUGCUUGUAUGUGACUACUGAUUAAUACGGU
rno-novel-mir-346	chr10:-:102267371:102267478	CUCUGGGCAACCCGAGGGCCGUUGGCAAUAAUGGGGCAUCCACUUGAGUCCUGGAAGCUCCUAUCCAUGCUGGGGAGCUGCUACGGUGCGGAGUGUGGGAGGACCAUG
rno-novel-mir-347	chr10:-:102300333:102300445	CAGCAUGCUGGGGCCGCUCUCUCCUCUCCUGGCAGCGCCUCCCGCAUUCUUGCAGGCGCUGCACCCAGAUCGACGAGACUAACCAAAUAGCUGCUCUGGGUUCCAGAAGCAUC
rno-novel-mir-348	chr10:-:102475462:102475569	CUCCCAAGGCUGGGACAGGCAAGAUGCCAAGUAGAGGUCUGUCUCCAAAGACCCUGUUGACUUGCCUCUCCCCUGAAGGCCCUCUCUGAUGCCUCCAUUCCCCUGUGC
rno-novel-mir-349	chr10:-:102577609:102577717	CCCCGCAGCUCCGGCUCGACGCAGGCAGACUCUGAGGCUCGGCAGCAGAGCGGCUCUUAGGACGCUGAGCCCCGGCAGCCCAGGGCUCUAGGCUCCGCGAGGCAGCGGC
rno-novel-mir-350	chr10:-:102577610:102577717	CCCCGCAGCUCCGGCUCGACGCAGGCAGACUCUGAGGCUCGGCAGCAGAGCGGCUCUUAGGACGCUGAGCCCCGGCAGCCCAGGGCUCUAGGCUCCGCGAGGCAGCGG
rno-novel-mir-351	chr10:-:102577659:102577767	CCCCUCUCCGCGUCUCCGCCUCCGCCGCGCUCGUCCCCGGCUCCCGCUGCCCCCGCAGCUCCGGCUCGACGCAGGCAGACUCUGAGGCUCGGCAGCAGAGCGGCUCUUA
rno-novel-mir-352	chr10:-:102577660:102577767	CCCCUCUCCGCGUCUCCGCCUCCGCCGCGCUCGUCCCCGGCUCCCGCUGCCCCCGCAGCUCCGGCUCGACGCAGGCAGACUCUGAGGCUCGGCAGCAGAGCGGCUCUU
rno-novel-mir-353	chr10:-:103340393:103340500	UGGACUUGACUGUCCCUCCAGUGGACUUAGGGAGAGAGCACAAAGAUGAUUAGAAAAGGCUCCUGCAAGCCCGGGUCCUGGGGCAGCUUCUGGGCUAUCCUGGCCUUG
rno-novel-mir-354	chr10:-:103340443:103340550	GUCCUCUUGCUGGAUCCUAUAUAAGGAGGAGGGAUGGGAUCGGAGUGCUUUGGACUUGACUGUCCCUCCAGUGGACUUAGGGAGAGAGCACAAAGAUGAUUAGAAAAG
rno-novel-mir-355	chr10:-:103340763:103340870	UGGACUUGACUGUCCCUCCAGUGGACUUAGGGAGAGAGCACAAAGAUGAUUAGAAAAGGCUCCUGCAAGCCCGGGUCCUGGGGCAGCUUCUGGGCUAUCCUGGCCUUG
rno-novel-mir-356	chr10:-:103340813:103340920	GUCCUCUUGCUGGAUCCUAUAUAAGGAGGAGGGAUGGGAUCGGAGUGCUUUGGACUUGACUGUCCCUCCAGUGGACUUAGGGAGAGAGCACAAAGAUGAUUAGAAAAG
rno-novel-mir-357	chr10:-:103671221:103671328	AGCCAGACUGGGGAAGCACAAUUGGUCUGGGAAUGGGGAGCACAAGGAGCACCACCACUCCCCGUCCUCCACCCCACCCCCACCCUCACCCCCGCCUCCCCUCCUCUC
rno-novel-mir-358	chr10:-:103793137:103793247	UGCCUUUGAAGAGGCAGCAGCUGCUAGUGGACGGUGGAGGACGCUGGAGGGGCACGGGGUCUGGUAUACACGGCAGCAGGGCCAGCACUGCCUCCUCCACUGCAGAGGAGG
rno-novel-mir-359	chr10:-:103826357:103826464	GGCUGCACGACCUGCGCUCAGCCACUAAGGAGUCACUGUUAGCUGUUCUGCCGGCGGGUUGCUCUUCUCAGCCAUGGCUCCUCGCUGCUGGCGCUGGUGGAGCUGGUC
rno-novel-mir-360	chr10:-:103906958:103907067	GCGUACAGCUGGAUUGGAAUGGCCUCUGCUUUUCCCCUCAGGACUUCCAGUUCAUCCUCAAGGGGAUAGCUCGGCUGCUGUCUAAUCCCCUGCUCCAGACCUACCUUCCC
rno-novel-mir-361	chr10:-:103907002:103907112	UCUGGAGAUUGGCAUGGUUAUGGGAGAAUGGGGAGCCAUUUAUAGGCGUACAGCUGGAUUGGAAUGGCCUCUGCUUUUCCCCUCAGGACUUCCAGUUCAUCCUCAAGGGGA
rno-novel-mir-362	chr10:-:103972377:103972484	CGGGGGUCGGUGAAGGUGAGUGAGUGUUGUUAGAAGUAUUGCGUUUGAUCUCCACGAACUCUUUUGUAUUAUAUUCCAGACCUUGCUCCGACGCUUGUUCCCUCCAGC
rno-novel-mir-363	chr10:-:104036283:104036390	CCCUCACCGCGCUCUCCACACCGCUUCCGGGUUCAGGGCGGAAGUCAUUCUAGCCCCGCCCCAGGAAACGGAGUCGGCGUGGUUACUGAGCGCCUCCUGGGCUUCCCG
rno-novel-mir-364	chr10:-:104036292:104036399	AAGGCACACCCCUCACCGCGCUCUCCACACCGCUUCCGGGUUCAGGGCGGAAGUCAUUCUAGCCCCGCCCCAGGAAACGGAGUCGGCGUGGUUACUGAGCGCCUCCUG
rno-novel-mir-365	chr10:-:104075733:104075844	CUGUGGAGGGUGGGCCCUAUUGGCUCUAUAAAUUAGGAAUCCGGCGAGACCCGCGGCGGCAGAAGCUCGUGGAGCCUGGCUGUUUGAGCUUGUGGAGUCAUCUUCGCCGGUU
rno-novel-mir-366	chr10:-:104075735:104075844	CUGUGGAGGGUGGGCCCUAUUGGCUCUAUAAAUUAGGAAUCCGGCGAGACCCGCGGCGGCAGAAGCUCGUGGAGCCUGGCUGUUUGAGCUUGUGGAGUCAUCUUCGCCGG
rno-novel-mir-367	chr10:-:104251191:104251298	CUCUUUGAGUUUCGGAGUUUGAGAGUCAGACAGAAGAGAAGCAGUUGUGGCUUUAGAGCACCAGUGUCCUCUGUUGCUGGCUUCUUAGAGCCGUAGAACUUGGAGAGG
rno-novel-mir-368	chr10:-:104479433:104479545	AUGGAGUCCUUCCGAUCCUAAUACCCACACUAAAAUUUCCAGCUAUGAAGUCCCAGGCCCAGCUUGAAGAGCAGGGAUUUUACAGCUGGAAGUUUUACUGCCUUCCAGAUCUC
rno-novel-mir-369	chr10:-:104564325:104564432	CCGAGGCCCGGCGGGCCUUCAUGGAGGAGUUUGGAGCCGAGCCGGAGCUGGCAGUGUCGGCGCCUGGCCGCGUCAACCUCAUCGGGGAGCACACGGAUUACAACCAGG
rno-novel-mir-370	chr10:-:105318017:105318128	AGCCCAGCACCAAACUGGGUUCUGGGGGGAGCAGGCACAUGGGAGAGGGCUGGGGCUGUGUUGUUUGGCCUUCAUCAACCAUGUGCCUGUUUCUUUCAGAAUAUUUUGGCCA
rno-novel-mir-371	chr10:-:105452123:105452233	CUGCGGCGCUCGGUUGCGGCGCUGUUGCCUGUGGUCGGGACGCGGAGGCGGCGCGUCGGUAUCGCGCCUCGUCCCUCUGCGCCUCCGCCGGUGGCUGCGUCGGCGUCACAG
rno-novel-mir-372	chr10:-:105576820:105576929	GGAUGGCGAAGGCUGUGGGAUGAGGGUGGGGACAGCUGGCUUUCUGUCAUGAGACCCACUGCCAUCGGUCCCCUCUCUCUUAGAUCUGCACAGAGCAGGCCCAGAGCAAC
rno-novel-mir-373	chr10:-:10590057:10590168	GCUCUGACUCAGGGACUUUCUCCAAGGCUGACAUGACUUUCCCAAACGCCCCAUGGGAGAGUAGUGGGCCUUCUUGGAGACCAAGGACUUAUCUCUCUUCAUUUCCUGGAUC
rno-novel-mir-374	chr10:-:106065605:106065712	CGAUCCCUCCCCCUCCCCGCCCCGCCCGGCUGUCUUGGGGCCCUACUGCGCAUGCUCGAGUUACCUAUCCGCGCGUGCGUAGGAGGGGCUCAGGACGUGGUCUACCCC
rno-novel-mir-375	chr10:-:106125302:106125409	AGGACUCAGUCUGACCUGAGGGCUAGGGGAAUGGCUGGGAGAAGGGGGGAAAAAAAAAACCCAACCACUCAUCUGCUGGGCUGGAUGUACCCCCAAGGAGGCAGGAGA
rno-novel-mir-376	chr10:-:106242265:106242373	CUUUAUUUACUCCGGACGAGGACGCAGGACUAGGGGCCACGGCACCGGCAGUGGCAGUCACGAGGCCUCUGGAAAGUCCGCGCAUGCAAGCCCAGGGAGGAGAUGGCAG
rno-novel-mir-377	chr10:-:10629862:10629973	CUUAAGGCAGGGGGCAGAGUCUGGCUGGGGCGGGGUUGGGACCAGACCAAUCAAGGAGCAAGAUAAUCUUGUGGGGGUGGUGCCAGGCCAGGCCAGACUCUCCCGCUGUCCC
rno-novel-mir-378	chr10:-:106471804:106471914	AAAAUCUGGAGCCCGGGUUCUGUCUUGUCACCCAGUCAGCCAGGGGCACCCCUGCUACCCAGACCUGAGGUCGAAGAGGGUCCCUGCUGCUGAAGUGAGGAGGUGGUUCCA
rno-novel-mir-379	chr10:-:106616006:106616115	GGGUGAAUCCAGGCAUCUUGGCGCUCUGCUGACAUCAUGGAAAAUCUUAGCUGCAUGGCCGCAGAGCACACACUUGCCAAUUAGCAGGGGAGCCCACAGAGGAAAGAGGU
rno-novel-mir-380	chr10:-:106882018:106882130	AGCCGGUCCAGAGAUAAACCACCGAUCACCACCUGACCCCUGGAGGCCUGUUUGUGGGCCCAGGGAUCACUGGGGCUGAUCUAGAAUCUUUCGACAAGGCUGUUACCAGGAAC
rno-novel-mir-381	chr10:-:106919361:106919468	GCUGUGGGAGUCACAGGAGCUUGGGCUUACUAAAGGGACCAGGUAGCAGACAUAUAUUCCUACCAUGUGCCCAGGCAUCCACCACAGGGUCCAGGGUCCUCAGCUGAA
rno-novel-mir-382	chr10:-:107235297:107235411	GAUCCACCAUGGCCUCUGACUGGAGAACUGCGGAUCAGCUGAGGCUUUGAUGUUGCUGCCCAGAGCUUGACAGGACGAGGGGGCCACAGGAGAGGGGACACGCUGCCGGUAAGAG
rno-novel-mir-383	chr10:-:107235347:107235461	CCAGAGCUGGGAGAGCUCCGGGGAGCCUGGGCCUGUGGGAUUGCUGUACAGAUCCACCAUGGCCUCUGACUGGAGAACUGCGGAUCAGCUGAGGCUUUGAUGUUGCUGCCCAGAG
rno-novel-mir-384	chr10:-:107297344:107297453	UUUCUCAAGGGCCGAUCUGUUCCCUCCUGGCUCUCCGCAGCUGCUCCCCUGCAGACCACUGUGAGCCUGAGGCCAGGACAGAGCUGCAGAAAAAGAAGAAAAGACGGAAA
rno-novel-mir-385	chr10:-:107297352:107297462	CCUGCAGUGUUUCUCAAGGGCCGAUCUGUUCCCUCCUGGCUCUCCGCAGCUGCUCCCCUGCAGACCACUGUGAGCCUGAGGCCAGGACAGAGCUGCAGAAAAAGAAGAAAA
rno-novel-mir-386	chr10:-:107297394:107297504	ACACUCCAGCAGUGGAGCUGCCACUGAGGGAGCAGGCUCUGGCCUGCAGUGUUUCUCAAGGGCCGAUCUGUUCCCUCCUGGCUCUCCGCAGCUGCUCCCCUGCAGACCACU
rno-novel-mir-387	chr10:-:107297402:107297512	CAUCUCACACACUCCAGCAGUGGAGCUGCCACUGAGGGAGCAGGCUCUGGCCUGCAGUGUUUCUCAAGGGCCGAUCUGUUCCCUCCUGGCUCUCCGCAGCUGCUCCCCUGC
rno-novel-mir-388	chr10:-:107297403:107297514	GCCAUCUCACACACUCCAGCAGUGGAGCUGCCACUGAGGGAGCAGGCUCUGGCCUGCAGUGUUUCUCAAGGGCCGAUCUGUUCCCUCCUGGCUCUCCGCAGCUGCUCCCCUG
rno-novel-mir-389	chr10:-:107386121:107386229	CAGAGGAUCCUCGGAGCGCAAUAAAACGGCGGCUCGGCCCGAGCCCGCAGCAAACACAGCCAUAGAAGGCAGCGGAGGAGCCGAGCCGGGCUGCGCUCGCUCGCCGCCC
rno-novel-mir-390	chr10:-:107396372:107396479	UCCUCACAGCCAGCCUGGCUCCUGGGCCCUGGCCUUCCACAUCCAGCACACUGGCUCUCCAAGUGUGCCUACCCUGCGAUCUGGAGGACUCCAACCCUUCUUCUGAAC
rno-novel-mir-391	chr10:-:107667101:107667212	CACACUUACACACUCACACAUGCAUGCACAUACACACACUCACACAUGCUACGUACGUGUGUGUAUAAGUGUAGGUGUGAGUACGUAUAUGUACAUGUGUGUGUACGUGAGU
rno-novel-mir-392	chr10:-:107830850:107830962	AUUUUUAGAUCGCCCACUGUGUGCUGUCUGGAAGCCGAGGGCUGGUGGCCUUACCUUCUAGAGAGCAGAGAGAUAGGGUUUGUGUCAGAUAGGUGGAUUACACCCCAGGGAUG
rno-novel-mir-393	chr10:-:108150481:108150589	UGACGUCAGCGGGAGAGUAUUAUGGGCUGUCGAGGGCUGGCUGCUGCUUUUCUGCUCCUGGAAGCGGCUGAGGGGGGAAGCGGCGAGUCAACAUGGAGCUCUCGGCGGU
rno-novel-mir-394	chr10:-:108150486:108150593	GAACUGACGUCAGCGGGAGAGUAUUAUGGGCUGUCGAGGGCUGGCUGCUGCUUUUCUGCUCCUGGAAGCGGCUGAGGGGGGAAGCGGCGAGUCAACAUGGAGCUCUCG
rno-novel-mir-395	chr10:-:108335090:108335204	GAAUGUGGUAUGUGGGAGGGCAUGCAUGGGGUGGGUGUGUGCAUGUACACAAAUGUGUAUAUAUGUUCACAUGUGUGCCUGUGUGUGUUCUCGUGUACCAUGCAGGAAUGUGGGG
rno-novel-mir-396	chr10:-:10888419:10888526	CGUCGCGGGUGGGAGAGUGGCGGGUCGGAAGCGGAAGAGUCGCCCAGAAGCUGGGGAAGAAGGUUGGCGUUCUUUCCCCGGCUGAGUGACGUUGGCUGGGUUCUUUGC
rno-novel-mir-397	chr10:-:109192244:109192356	GAUGAGGAGCUGGAGGAGGGAAAGACUGGGAGGGCUGCUCAGUGUGGACACUGGAGCUCUAACAUGUCUGCCAACAAUAACAGUGGCAGUCGAGACCCAGAAUCCUGGGAUCC
rno-novel-mir-398	chr10:-:109225542:109225649	CAAGAUGGCGCUGCGGCGGGAGGAGGAGGGGCGCAGGGCACAGCGUCGGUGCCCCCGCCGCCGCCCGCUCCAAGCGCCCAGGCUGUUAUGCGCUGAUGGGGGCAGCCG
rno-novel-mir-399	chr10:-:109324745:109324854	AGGCCGAGGCCAUCCUGUCACAUGCACUGCUUGUGGCUGCUCCAGAAGACCAGAGCCUGCUUCCCUUGGCUCUGAUCUGGCUGGACCAUGGGGGAAGCAGUGGAGACCAG
rno-novel-mir-400	chr10:-:109522967:109523075	UCAGGGCGGCCACUGGCCUCCCGGCGGCGGGCGGAGCGCGGGUCCAAAUCGCCAAAUAUGGCCGCGCGCCGCCCGUCACCCCUGCCCCCACCCGCACACCUGAGCCGCA
rno-novel-mir-401	chr10:-:109523134:109523241	CCGUCUCCUGGGAGGGCUGCGCCUCUGAGCCCAAGCGCACAGCCGAGGGUCUCCGCGCGCACCGGCCGGGACCGCCUUUGUCCCGCGGGCCAAUGGGUAGCCUGCUUG
rno-novel-mir-402	chr10:-:109523321:109523430	CUCAAUUCCUGCUCCAAGAGGGGUGGGGCUGCCAACUUCCAUAGCAGGCAAGAACGGCCCCGACCUGACCUUGGGCGAGGCCUCACACUGCCCAGUUGCAAAAUAAGACA
rno-novel-mir-403	chr10:-:109542097:109542207	CACCAGGCUUUAGUACCUCAUGCCUUCCUCCUUCCUGACAGCUGCUGGCCAGCUCCACGUCACUGUGGGACACACUGGGGGCUUGCCUGGCAGUACCCCUCAACUGUAACC
rno-novel-mir-404	chr10:-:109554512:109554621	ACAAAAAAAAGAUAAAACUGCACAGAUGGAGUGAGAUAGAUUUAAUUCUACUCUCUUUCCUCCUUUAGUGCAGCCCCUCUUGGGUGGUUUAUUGGGCAGGAGGCCACCAU
rno-novel-mir-405	chr10:-:109722039:109722147	UGACCAGGUGGGUCUCAGGUGUGUGUGGGAGCUGGGACCCCAUCUCUCCUGUUACUCUCUCCUCACACGUGGGACUUUCCCCAGCUCUCCUGUCUCUAGAGUUGUCUAC
rno-novel-mir-406	chr10:-:109991647:109991760	CAUGAAAGUUAUCAGACUGACAUGAGUACCCACAGGGCGACCCGGGAAGCCUGUCCUGAGCUGGACUACUUUGUGGCCUUCUCCUCUGUAAGCUGCGGGCGUGGUAAUGCUGGC
rno-novel-mir-407	chr10:-:109994462:109994575	CCCUAUAUACUUAAUAGGCUUGUGAGGUGGCAGGGGAACAAGGAGCUGGCCAGGUAGGCCCCUGUGGCAUCCUUGCUUUCUUUCCCCUCAGACAAGCCCGAGGAGCAGACAGCA
rno-novel-mir-408	chr10:-:109994463:109994573	CUAUAUACUUAAUAGGCUUGUGAGGUGGCAGGGGAACAAGGAGCUGGCCAGGUAGGCCCCUGUGGCAUCCUUGCUUUCUUUCCCCUCAGACAAGCCCGAGGAGCAGACAGC
rno-novel-mir-409	chr10:-:109994463:109994574	CCUAUAUACUUAAUAGGCUUGUGAGGUGGCAGGGGAACAAGGAGCUGGCCAGGUAGGCCCCUGUGGCAUCCUUGCUUUCUUUCCCCUCAGACAAGCCCGAGGAGCAGACAGC
rno-novel-mir-410	chr10:-:109996159:109996266	CUUCCCCAGCAUGGACUGCCUCGACUCUUGGCUGCUGCCUGCCAGCUGCAGCUCAACGGGAACCUGCAACUGGAGUUAGGUGAGGUACUGGCUCGAGAGAGGCUCCUG
rno-novel-mir-411	chr10:-:110000661:110000768	CAUCGUGGGCAUCAACUCGUUUGGCUUCGGAGGUGCCAAUGUUCACGUCAUCCUCCAGCCCAACACACAGCAGGCCCCAGCACCUGCCCCACAUGCUGCCCUACCGCA
rno-novel-mir-412	chr10:-:110088137:110088248	UGUAGAGUAAGAAAUGAUGACAAACACUUUGGAAGGUUCCAGAGUGCUGAGUGAGCCAUUGUGGAACCCUUCCCUGUGUUUCAGACAUGAAGAGCUUGACCGUCAAGCCAGG
rno-novel-mir-413	chr10:-:110182339:110182448	GUGGCCCCCGCCCCCUUGGGUUGCUAGGGGAAGUGACGUCACAGCGCGAUGGCGGCGGCUCCUUUAGGCAGCUGAAGGGGGAUUUAGGCCCGGAAGAUCCGAGUCCAUCC
rno-novel-mir-414	chr10:-:11035322:11035429	UGCGGAGGGAGUCGCUGACGCGGAGACUGACUGACCUACAGAGCGGCUGAGGGUGAGUGGCCCGCUCGGUCCCCAGUCCUCCCCUCCCAGGUCCUAACCUGGCGGAGG
rno-novel-mir-415	chr10:-:110627308:110627420	AUUUUAAAGCCCCUGUGUGGGAGCAAAAGCAAGAAAGUAAUCAUGCAGCAAAGAUAAAUCCUCUGGUCCCAAGAGGAAGUCUGCCUGCAAGUGCUGGCUGACCCCUCAGCAGA
rno-novel-mir-416	chr10:-:11337290:11337397	CGUCGCGGGUGGGAGAGUGGCGGGUCGGAAGCGGAAGAGUCGCCCAGAAGCUGGGGAAGAAGGUUGGCGUUCUUUCCCCGGCUGAGUGACGUUGGCUGGGUUCUUUGC
rno-novel-mir-417	chr10:-:11392453:11392560	GCCGGGCGACAGGCGUGCGGGCCGGCCGGCGUCGGGGGAUCAGACUCUGCGGCAGCCCGCACCGCCGUCCGCGAGGGACCGGCGCAGUGCCCCGAGCUCGGCCCUGGG
rno-novel-mir-418	chr10:-:11392503:11392610	GCAGCGGCAUCUGUAGCUCGGGCAGGGCCCCUGGGCGCUGGCCGCGGCGUGCCGGGCGACAGGCGUGCGGGCCGGCCGGCGUCGGGGGAUCAGACUCUGCGGCAGCCC
rno-novel-mir-419	chr10:-:11727191:11727299	CUGCCACUGCAGGUCCAGCUGCAAAGGAGUGUGCAGACUCAGCCCAGAAUUACAUCCAAUACAGGCUGCAUUGCAUGAUUCUCCCAUGCAGUUGUAAAAUAUAUCCAUC
rno-novel-mir-420	chr10:-:12858158:12858269	GGGUACACUUUCAGCCCAGAUUUGCUGGGUAUUAGGGGGUUAAGUGAGGAUGGGCUGGUGCUGGAUACCCGUUCAGCACUCUGGCCCUGUCUCUCAGGGUAACUUCCUUCAU
rno-novel-mir-421	chr10:-:12997873:12997981	GGGCGGGGGCGGAGCCGCAGCCCCGAGUCUUGGCUGGCCGGUGGUGGGAGCAGACCGUUCUUGCCUCUGAACCGGCAAUCAUGGCUCCGGGUUGGCCGCGGCCUCUGCC
rno-novel-mir-422	chr10:-:13075654:13075767	CUCCGACAGUGGGGUUGCCAGCUUCCUCUCCCUUGCGGGGGCGUCGAACUCGCGCGUGCGCAGCGUGUAAGGGAAGGGGGCCAGGACCCCCGGCUGACCCCGGCAGGGCGACCG
rno-novel-mir-423	chr10:-:13075849:13075956	AACGUCAGGAAUCUAGCGCGCGAAACACAGCCAGGGUGGCGGGGGCGAGGAGCCGGGGUGGAGCUUGCUGUCCCCUCCGGCGUCCGGCCGCGCCCGUCCUCAGGGCUG
rno-novel-mir-424	chr10:-:13091505:13091616	AGACAUCCCUUGGAGGCCGCUUCCUGGUGUACGAGUCCUUCCUGUACAGGAAGGAGAAGGCCGCCGGCGAGAAGGUGUACUGGAUGUGCCGGGACCAGGCUCGGCUGGGCUG
rno-novel-mir-425	chr10:-:13446045:13446152	CGAAGGGGCGCUGUGGCGGGGCUUGUUAGGAUCAUGGCGGAGAAUCACUGCGAGCUGCUACCGCCGGCUCCGAGCGGCCUCGGGGCGGGGCUGGGGGGCGGCCUGUGC
rno-novel-mir-426	chr10:-:13448992:13449100	CCAGCUGGGUUGUGGGCUCCCCAUGUAGAGCUGAGUUUCUCCACUCCACGGAGUGGCAUCAUGGCUCAAACUGUCAUUCUGAGCUAAAACCUGGUAGAUGCAGUAAAAA
rno-novel-mir-427	chr10:-:13450737:13450844	UAAGUGUGUAGACCACAUGCCCUCUGAGGCAGGCACUGAGAAAACUCUAGGGUGUGUGCCAGUAUCUCCCAAGUGUCGCCUGGGAUGCUGUGGGUAAACAUUUCUCAG
rno-novel-mir-428	chr10:-:13515283:13515390	AUGGCCAGGACCACCAGCCAGCUGGUGAGCGCGCGGCGGCUGUAGGGUGCACCCGUCCGUUACCCGGGAGCGUGGCGGUCGUCUGGGUUCUGCUGGGCGAGGCGGGGC
rno-novel-mir-429	chr10:-:13515285:13515393	CUCAUGGCCAGGACCACCAGCCAGCUGGUGAGCGCGCGGCGGCUGUAGGGUGCACCCGUCCGUUACCCGGGAGCGUGGCGGUCGUCUGGGUUCUGCUGGGCGAGGCGGG
rno-novel-mir-430	chr10:-:13531120:13531229	ACUCCUUUCAAAAUGCCCAGUUGGGAAGGGAGGGGUGGGGCUGCUAGGUGGGAAUGACUGCUAGAACCACCCUUGUCCCUUCCCUCAGGGGUGCACUUGGAAGGCCCGUU
rno-novel-mir-431	chr10:-:13531122:13531236	GUGGUUAACUCCUUUCAAAAUGCCCAGUUGGGAAGGGAGGGGUGGGGCUGCUAGGUGGGAAUGACUGCUAGAACCACCCUUGUCCCUUCCCUCAGGGGUGCACUUGGAAGGCCCG
rno-novel-mir-432	chr10:-:13531123:13531236	GUGGUUAACUCCUUUCAAAAUGCCCAGUUGGGAAGGGAGGGGUGGGGCUGCUAGGUGGGAAUGACUGCUAGAACCACCCUUGUCCCUUCCCUCAGGGGUGCACUUGGAAGGCCC
rno-novel-mir-433	chr10:-:13531124:13531236	GUGGUUAACUCCUUUCAAAAUGCCCAGUUGGGAAGGGAGGGGUGGGGCUGCUAGGUGGGAAUGACUGCUAGAACCACCCUUGUCCCUUCCCUCAGGGGUGCACUUGGAAGGCC
rno-novel-mir-434	chr10:-:13552600:13552713	UCGCUAUGGCUGACCACGUACCAUAUCUUCUGUGUGCUAUCCCUGCUCCCAUUAUGACCUCUAGGUCUCUGGAUGUGACACGAGGGACUCGGGACAUGGUCGGACCAUGUGUCA
rno-novel-mir-435	chr10:-:13619867:13619974	CUCCGUGCACUUGCCCCAGGCGCGGGCGCGCUUGAGAGCGGUCUAAGGCGGCAGUGGUGGGAGCUCGGCGAUGGGGAGCGGCGGUGGUGAGUGCUGGCGGGAGCCGGG
rno-novel-mir-436	chr10:-:13631221:13631330	CACAAGACUUUGACAUUCAUUGUCGGCUUCUGCCUCCUCCCGCACUGUCUGAGGCUUUCUCCUCUUCCCCAGUAUGGAGGAGUGUGAAGCCUUAUGUACCCGGCUGGCCA
rno-novel-mir-437	chr10:-:13797193:13797304	GGUGUGUAUGUGUCACAUAGAGCUUUCACUGAGUUCCUGCCAGCUGUCUGCUGGACAGAGCUGCAGGCUCUCAGGCAGGCACUUGCAGAGGAAGGGGUGAAGAACAGAUUGC
rno-novel-mir-438	chr10:-:13965600:13965710	UAGCCAGGAAGAAAAGUCCCACUUGGAGGAGCUGGCUGCAGGGGGUAUCCCCAUUGAGCGGGCCAUCUCCUCUGAGGGGGCUCGGCCUACAGUGGACCUGUCCUUCCAACC
rno-novel-mir-439	chr10:-:13982904:13983011	UCGGUGGUCAUCUCACAGCUCUCCCACAUCCCCGAGGAUAAAGACCAUCAGGUUCGAAAGCUGGCUACCCAGCUGCUGGUGGACCUGGCAGAGGGCUGCCACACCCAC
rno-novel-mir-440	chr10:-:14001045:14001152	AAGACACUCCCUGCUCCUGGGACACAGGCAGCUGAGGACACUGUCUAGAUAAGCUCAAGUGUCAACAAAGAGGCUGCUUAGUUGAGGGAGCUGAAGAGUGGAGACUGA
rno-novel-mir-441	chr10:-:14067934:14068045	CAUUCUCUGGAAGGUGUGAACCUACGGGAUGGGAUGAGGCAGGGGAAAGGACAGACAGCACUUGGGCUUGUCUGACCCUGAUUUUAUCCCAGGACGUGACAGAAGCUGAGCA
rno-novel-mir-442	chr10:-:14067936:14068045	CAUUCUCUGGAAGGUGUGAACCUACGGGAUGGGAUGAGGCAGGGGAAAGGACAGACAGCACUUGGGCUUGUCUGACCCUGAUUUUAUCCCAGGACGUGACAGAAGCUGAG
rno-novel-mir-443	chr10:-:14268839:14268947	UGGAAGCAGCCAAGCAAGCCAAAGUCAAGCUGGAGAACCGAAUCAAAGAGCUUGAAGAAGAACUGAAAAGGUGAGAACACCGGAGACUUGGGCUUUGCACUGGGUGUUC
rno-novel-mir-444	chr10:-:14343978:14344088	UGUAGCCCGUGUGGUACACUCCAAGGCCUUCUGCACUGUACACUGGCAAGAGGGUGGCCGGUGCAAACAGGGCACCAAGGACACACACUCACUGCCUCCAGCUCAGAUCCU
rno-novel-mir-445	chr10:-:14343982:14344093	CCGGGUGUAGCCCGUGUGGUACACUCCAAGGCCUUCUGCACUGUACACUGGCAAGAGGGUGGCCGGUGCAAACAGGGCACCAAGGACACACACUCACUGCCUCCAGCUCAGA
rno-novel-mir-446	chr10:-:14447618:14447725	UGGGUAGAGUAGGGGUGGCCACCAUGGUGUGUGUGGGUGUCUGUGGUUGAAAUUUUACACAUCCAGGUGUCCUUUCUUUCAAGCCAGCAUAUUCUGUCCACAGGUAAU
rno-novel-mir-447	chr10:-:14597874:14597981	CUCACGUGACCGUGCGACCCUGGGAGCGAUGGCGGGGCGGCUGACUGGCUUCCUGAUGUUGCUGGGGCUCGCGGCGCAGGGUCAGUGGCUUCACGCGCAUAACCCCCC
rno-novel-mir-448	chr10:-:14740816:14740926	UCCGAAGGCAAGCUGGCCCUCUGGGUGGGACAGGGUGAGGUGGACUUGGACCUCCCACUGGUCUCUCCCUGCAGGAGCGGGCCUUCCUCAGCGUCUCCAACUACAUCUUCA
rno-novel-mir-449	chr10:-:14923037:14923144	GAAUGGAUGUCGCAGGCAGCCCUCUGCAGGCCCAGGCUGAGCGAGGCAUUUUUCAUCUCCUCAGGAAUGCAUGGGGUGUCGGGGGAGUUAGCGGUUCUGUCGCCAGAG
rno-novel-mir-450	chr10:-:14937090:14937197	GGAGGGGCGGGGUUUCGGCCGCGUUUUAAAGAAACUUGUUGCGGGUCCCAGAACUGAGACUGAGCUGCAGCGGCAGAGGAGCGGUUGCUGGGCUCCUGCGGUGAGGAC
rno-novel-mir-451	chr10:-:15092933:15093046	CGAUGCUCACACGGUGGGGACAUGGAGGGGUCAGAGGGUCAGGACCUAGCUGCUCCUGCAGGGAUUCCUGGCCUGCUCACUCCUCCUAGGGCCUGUUUGACAACUUUCUACGCC
rno-novel-mir-452	chr10:-:15092938:15093046	CGAUGCUCACACGGUGGGGACAUGGAGGGGUCAGAGGGUCAGGACCUAGCUGCUCCUGCAGGGAUUCCUGGCCUGCUCACUCCUCCUAGGGCCUGUUUGACAACUUUCU
rno-novel-mir-453	chr10:-:15198439:15198550	AUGACAUGAGUGCCCCGGUGGACAGAGUGUGUGUGUCUGUGUGGAGGAGACAGGAGUUGCCCACACAUGGCGCUCAACUCUGCAGGAUAAAUACAUGGCGGACAUGAAUGAG
rno-novel-mir-454	chr10:-:15198440:15198550	AUGACAUGAGUGCCCCGGUGGACAGAGUGUGUGUGUCUGUGUGGAGGAGACAGGAGUUGCCCACACAUGGCGCUCAACUCUGCAGGAUAAAUACAUGGCGGACAUGAAUGA
rno-novel-mir-455	chr10:-:15198446:15198555	CAUGCAUGACAUGAGUGCCCCGGUGGACAGAGUGUGUGUGUCUGUGUGGAGGAGACAGGAGUUGCCCACACAUGGCGCUCAACUCUGCAGGAUAAAUACAUGGCGGACAU
rno-novel-mir-456	chr10:-:15198446:15198557	CCCAUGCAUGACAUGAGUGCCCCGGUGGACAGAGUGUGUGUGUCUGUGUGGAGGAGACAGGAGUUGCCCACACAUGGCGCUCAACUCUGCAGGAUAAAUACAUGGCGGACAU
rno-novel-mir-457	chr10:-:15198446:15198558	GCCCAUGCAUGACAUGAGUGCCCCGGUGGACAGAGUGUGUGUGUCUGUGUGGAGGAGACAGGAGUUGCCCACACAUGGCGCUCAACUCUGCAGGAUAAAUACAUGGCGGACAU
rno-novel-mir-458	chr10:-:15198447:15198558	GCCCAUGCAUGACAUGAGUGCCCCGGUGGACAGAGUGUGUGUGUCUGUGUGGAGGAGACAGGAGUUGCCCACACAUGGCGCUCAACUCUGCAGGAUAAAUACAUGGCGGACA
rno-novel-mir-459	chr10:-:15198448:15198558	GCCCAUGCAUGACAUGAGUGCCCCGGUGGACAGAGUGUGUGUGUCUGUGUGGAGGAGACAGGAGUUGCCCACACAUGGCGCUCAACUCUGCAGGAUAAAUACAUGGCGGAC
rno-novel-mir-460	chr10:-:15212935:15213046	UGCUUUGGGCAGCAGCAGGUUCUCACACCCCUCCUUUCCCCCAGUAUGGAGACCUAGGGGUAGAGGGAGUAGAACUGUGGCUGGCUGCGAGUGCGGACCAGCGUGUCAGCAU
rno-novel-mir-461	chr10:-:15304778:15304885	CGGGCUCAGGCAGUGGACAGCCCGGGCACGUUUGGGGACCGGACCGUCGCGCGACAACGCGCGGAGCCGGCGGAAAUGGUGCUGAUGUCCCGCGGCGGGCCUGGGAGC
rno-novel-mir-462	chr10:-:15511067:15511176	CAGUGAGGAGAACAGACUCCAUUCUGAUUGGAGGAACAGUAAUGGCUAAAUUAAUGGUGCCUAAUGGGAAUGGGCAAACAAGGGCAGGUUCUCAACAGCCCUUCUCCACC
rno-novel-mir-463	chr10:-:15667983:15668092	CCCCACCCCCGCGCUGUACGCCUUCUGCGCAGACUCAGGCUUCAGUCCCCGCCCUCACUGCGCUUCCGGUGGCCUGGGCUGUGCUGGCGGCGGCUAGAUGCGCGGCCGCG
rno-novel-mir-464	chr10:-:15864224:15864334	AGAUACAAAAAUAGUCAGUGGCAAAAGAGGGAUCUGCUGAGGCCUUUGCUGGGUUGCACACGGUCGCUAGCCAGCAGCUCAGGGAGGACGCAGAGAGCCAGCCCUGUCACU
rno-novel-mir-465	chr10:-:15928049:15928156	UUUUCGGCACCACGUUCUGGCUGAGGAGGGAGGACUCCUGUUUGUCCUCCUCCUCUACAUAUUGGCUUGACUCUGCUCUGACCCCCACCAGUGCCGCGCAGUAAGUAG
rno-novel-mir-466	chr10:-:16752142:16752250	GAAGGACAUAAACAAAACAAACCGAGGCAGCAUGGAGAGGGGCCGCGGCCGCUGCAACGCGGCCGGACCUAGUGCCUGAACCGCUUUCAGCCUCAGGUGAGUGCCGAGC
rno-novel-mir-467	chr10:-:16752143:16752250	GAAGGACAUAAACAAAACAAACCGAGGCAGCAUGGAGAGGGGCCGCGGCCGCUGCAACGCGGCCGGACCUAGUGCCUGAACCGCUUUCAGCCUCAGGUGAGUGCCGAG
rno-novel-mir-468	chr10:-:1690507:1690617	UGACUAGAAGUCUAUUUGUGUUGUAGGGUGCAUGGGGAGAGGCCAGCCAGAGGUGGGGCUGAACUUUACCAAGGGGACACAAAGGACUGCAGAGAAGCCAGGUGGGCAGAG
rno-novel-mir-469	chr10:-:17171254:17171361	AGCCAAGUGGUCUGUUUCUACAGCCUGGCAGAGAAGGGGCCAAGCUGACAGAAGGCAAGAGUUCACACACCAGUGGCUCACCUGCCAGGCGUUGGGCGGCAGUCAUUA
rno-novel-mir-470	chr10:-:17326511:17326622	AGAGUAGGGGGCAAGCGGAGGUGGGCCGGAAAGAAGGGGAGGACUCAAGUAAGGACCAAGUGGCCAGCUCGUGGCCAGCUCGUCCUUACUUGAGGACCAGGUGGGGCUCUUU
rno-novel-mir-471	chr10:-:17470054:17470166	ACUGGGGUUCUCUAGAAAGGCAGAAGUUAGGGAGGCCAAGCAGUGCUCUGUGUGGCUCUAACCAACCACAUACUCCUAGCUGCCUCUUCUCCCCACUUCGGUUCUAAGAGAUG
rno-novel-mir-472	chr10:-:18090901:18091008	GAUCUCGCGAGAUCUCCUGCGGCCAUAUAUACGUGCGGCGAGCCCGCGUCCUUUCCUUGGCGUGAUUCCGUCCUGCGUGUCUGUUCUGCGGAACAGUAGGCAGUUGUU
rno-novel-mir-473	chr10:-:19272493:19272605	GUUUUAAGAAGCAAUUUCCUAUCCAGGCACCUGGCAUGCUGCUUUGGUAUGGAUGAGUGGCUGCCUCAUGCCUGGGUAGUAAAUAUAUGUCGAUUAUAGAAUUUCUGCCAGGA
rno-novel-mir-474	chr10:-:20821526:20821636	AUGAGUAGACAGUUUUGCCUUUCUGAGUCUCAGUCUGUUCUAUGGAAUGGAACCCAUAAGAAGAAGGCUUAGACUCACUAGGCACAGAGACUGUUUCUCCUCUGGAGAAGA
rno-novel-mir-475	chr10:-:20936534:20936643	UAUAAAAAGCAACUCCCAGUUACUUCAGAGUUGCUUAUGUCAGGUGAGCGGGGUAGACACCGCUUCUCUCUCACCUGGUGUAAGCAAUUCACAAUUAAGUGAGUUCUUUU
rno-novel-mir-476	chr10:-:20936534:20936644	UUAUAAAAAGCAACUCCCAGUUACUUCAGAGUUGCUUAUGUCAGGUGAGCGGGGUAGACACCGCUUCUCUCUCACCUGGUGUAAGCAAUUCACAAUUAAGUGAGUUCUUUU
rno-novel-mir-477	chr10:-:21089637:21089748	UUUUAUACAUCUGUAUCUAUUUUCAGAGAUGUAGAAACUUGUAUAAAAUGUUAUACAUUGUAAUGUUUUUUUACAAGUUUCUACAUCUCUGAAAAUAGAUACAGAAUAGCUA
rno-novel-mir-478	chr10:-:21829648:21829756	CCUGUGACAUAAAUGUAUGUUCAGUCAUAGGUAGAGUUUAAGGAAUUGCUCAAGGCCAGCAUACAAGAGCUGGGACUGAAGCCAUUCCUAAUUCAUUGGCUCCCUGGUU
rno-novel-mir-479	chr10:-:2284481:2284589	AAGAGACAGCACUUUGCUUCCCGGACUUAGGAGCAGGGCUCUUCCCUGGUACUAUUAGCAUGGUCUAGGAUAGACAGCAUAUCUCCUCCUCCCUGGGAAGAAGACUAAU
rno-novel-mir-480	chr10:-:23480756:23480866	CAGGCUAAACAUUCGCUAUAGUACGACCAUGCAUGUGUCCCCAGACCUAGUUCUUUACCUGGGUCUGGUUUUCUCAAUGCUGGUGACAAGCCAAGUCUGAUUCAUUAAAUG
rno-novel-mir-481	chr10:-:24138916:24139026	CAGGACCAGGGCUCUCCUUCUACAAGAGUCCAUCAGUUCCAGCAUCUCCAGCUGUGGUACAUGCCAAGCAGAACUGGAGCAGUGGACUUUUGAUACCAUUUUCAUCCUUUA
rno-novel-mir-482	chr10:-:25910212:25910320	AGCAAUCCUGGUGCCCAGCCUAUCUCCCCGCGGCCGGGCGCAGUCCUUCACCGCACGCUGAACCGGAGGAAGGCUGCGCCUAGUCGGGGCGCUGAGGGACCCUCCACCG
rno-novel-mir-483	chr10:-:31041581:31041688	CAGUGCCGCCCUCUGGCGGCCCGGUUCCUUUCUCCCGCCCAUCGGCUUCGGCUUGCGGGCCUUUCAAACAUGGAGGAGCGCGAGUGGGGGGCGAGGUCGGCUCGCGCC
rno-novel-mir-484	chr10:-:31279076:31279183	CCCAAUAAACCAAGGUCCUCACUUUGAGGACAGAGAUUCCAUUUCUGCAGCACUUGUCUGCAGACACUGAACAACUUUAAUGCUCUUUCCUCUCUAGUGAUCCUUGUU
rno-novel-mir-485	chr10:-:31279601:31279709	CAGACACGGCCACGUACCCCAGGGAAGUCAUGUAAAUUAGAACCCUUGAGGAUGGUACACUAGAGUGUUCAUUUCUGGACACUAACUCUCAAUCUCUGGGAACAGGGCC
rno-novel-mir-486	chr10:-:31419125:31419237	CAUCCUGCGCCCCGGCGCGGGGCCCUGCGGUAGUCUCGGGUCCCUCCCCUGGACCUGUCGCUGAACCAGGUAAGGGAACCUUAGAGACAUCGUGGCUGAUGAGGGGACCGAAA
rno-novel-mir-487	chr10:-:32057220:32057332	AGAGCUAGACUCUACUUUCCAAUCAUCAUCAGGAUUGUGUAUUAAUAGUCAUUAAAGUGUGUAUUAGGUGCUUGCUGAAUGCUUUAUACACAUCUGAUGAUUGGAGUUAAGCU
rno-novel-mir-488	chr10:-:32061214:32061324	UUACAGUAUAGAACUCUAAAAGGGGGAUCCUGUGAGAGGCCUCAAGUUACUGGACGCUGGUGAUACCCAGUAUCUUGUAGGCCUUUUCUGCCAAGAUCUACAUGUUUCUCA
rno-novel-mir-489	chr10:-:3218152:3218262	UCGCAGCAGGUGCUGUAGUAGAGAUGUGGGCAUUAGGGUGCGGAGAGGAGAACCGCGGGGGUAGCCCCGUGCUUUGCGUUUCCCAGCCCUGACUCCUGCCUCGGGCCGAGU
rno-novel-mir-490	chr10:-:32834919:32835029	AACAUAAACCCUGUCUCAAUAAAGCAGAGACUGACAGAAGAGAGUGCCUAAUGACUUACUCCUCUGUUCUCUGUACAUUUGUAUGGAUGUGUACAUGCACGCACAUGCACA
rno-novel-mir-491	chr10:-:33048542:33048650	CCGCUUGCCGGGAGCAGGCAGCCUGGCUGGGUCGCUCGCCCUCGGCUCCUGACAGCGCUGAGGGAUUCGGGCAGUGCGAGGUCGCUGUGCUGCUUCUAGGCGGUGGCCA
rno-novel-mir-492	chr10:-:34166501:34166608	CCGGCUCUGGUCCUGGGAGUCCCUUCUGCAGUCGUCCGUGCCUGGUCGGUAGGAUGGCGCUAGGCCGCUGCGAUUGUAGCACGGAGAACAGGGCGCUGCUCAACGUCC
rno-novel-mir-493	chr10:-:34972996:34973107	UUAUACCGCCACUUUCUGGAAAGCCCUGGAAUUACUGAUAGCUAACUGUGUCUAGCCUUUCUCUGCAGAGUGGACUCAGUCAUCCCAGGGUUUUGUUUUCUGUGUGGCAUUA
rno-novel-mir-494	chr10:-:35047371:35047480	CCAACUAUGUUUGAGUUGUUAUGGAUUGAAAUGAGACAAUAUUGCAGAGGCAAAGUACAUUUUAUAAAAUAAAGACUUCUGUGUUCUGCAUUUCUAUUUCUCAUUUUUUU
rno-novel-mir-495	chr10:-:35716186:35716293	CCCAGCUGUUUCCUCCGUACCUAGUCUGCGGUUAUGGCUUCGCUCACGGUGAAGGCCUAUCUACUGGGCAAGGAGGAGGCGGCCCGCGAGAUCCGCCGCUUCAGCUUC
rno-novel-mir-496	chr10:-:35766018:35766129	CACGGCUUUAUUUAUGAGUCUGGCUUUGAGAAGCUGGGGAGAGGUAACCUGCUUCCUCCCAUCUUCUCAGAGCCACGACUCAAGAAGAAAAGGGUGCUCAGACUCUCUUAUA
rno-novel-mir-497	chr10:-:35766030:35766140	CCAGAGCUGCCCACGGCUUUAUUUAUGAGUCUGGCUUUGAGAAGCUGGGGAGAGGUAACCUGCUUCCUCCCAUCUUCUCAGAGCCACGACUCAAGAAGAAAAGGGUGCUCA
rno-novel-mir-498	chr10:-:35800066:35800173	AUCAGCAGUGACGCAGAGUUCGCCGGCCCAGGCCCCGCCCUCUUCCGAAAGCCCCGAAAACAAUUUUAAGAUGGCGGCGGCAGCGGCGCGGAAAACAAUGGGGCAGGG
rno-novel-mir-499	chr10:-:35859677:35859787	UGGACUAUAAGUACGCCCGCGCCCUCGUGCUUGUGAAUCUUUCUCUUCCAGGAGCGCGCCGGGGCCGCGGGGUCGUCAUCUGUGGCCACCUUCUUCUCCAGCAGUUGCAUG
rno-novel-mir-500	chr10:-:35870282:35870390	GCGCAUGCGUCUGCCUUCAAACCGUUCUCUAGACCUACCCGCCAGAGUGGGGGAGGGGAAUGGCGAUAAUCAGCUCCCAGCAGGGACUGGGUAAUAAUCCAGAGUUCAG
rno-novel-mir-501	chr10:-:36336463:36336572	CGGGAGCCUACCGGGUAGGGCUGCGGACCUGGCGGGAGCGCGCUGAGGCUUCGGCGGCAGGUACGGGCCUCGGGCCCUGACUCCAGGUCCCGCGGCCCGAGCAGCGGUCA
rno-novel-mir-502	chr10:-:36422722:36422831	GUUAGCUCCCCAGGCUAAGUCUCCAUGCGUGGCGGCUCUGAGCCUUCAUGAGGCGUGGCGGGACCUGGGGGGAGGUGAGCAGCCAGGCUGGAGGACACGGAGGCCUGUGG
rno-novel-mir-503	chr10:-:37066682:37066793	UUAUACCGCCACUUUCUGGAAAGCCCUGGAAUUACUGAUAGCUAACUGUGUCUAGCCUUUCUCUGCAGAGUGGACUCAGUCAUCCCAGGGUUUUGUUUUCUGUGUGGCAUUA
rno-novel-mir-504	chr10:-:37141060:37141169	CCAACUAUGUUUGAGUUGUUAUGGAUUGAAAUGAGACAAUAUUGCAGAGGCAAAGUACAUUUUAUAAAAUAAAGACUUCUGUGUUCUGCAUUUCUAUUUCUCAUUUUUUU
rno-novel-mir-505	chr10:-:37371931:37372041	AUUCUGUAAACAGAGCCGGUUUGGGCCUCAGCCAAGGACUGGGUGUCCUGGCCCAGCCUGGGUGUGAGGCCCAUCCGUGGCUCUCCAGGACACCCCGCCCUGCCCAGCUGC
rno-novel-mir-506	chr10:-:37371932:37372043	AGAUUCUGUAAACAGAGCCGGUUUGGGCCUCAGCCAAGGACUGGGUGUCCUGGCCCAGCCUGGGUGUGAGGCCCAUCCGUGGCUCUCCAGGACACCCCGCCCUGCCCAGCUG
rno-novel-mir-507	chr10:-:37706446:37706557	CUCAGAGCCACCUCCAUGAGGAAUCAAGGUAUUUUGCCUGGGAGGCGUGGAGGGACCACGAAUGCCAAAGUCCUUGCCUUCCUUCCAGGAGAUCAGGCUUCUCUCUCUCUCU
rno-novel-mir-508	chr10:-:38837753:38837861	CCAUCUGAGAUACAGCACACCUCUGAGACCCCACCCUCCGGGGUCACCCUGGUUGAGGCUCCAUCAGACUCAGAGCCACAGGCCAGGGAACCCGAGAAUCCAGAGCUAC
rno-novel-mir-509	chr10:-:39228068:39228175	UUACCCGGGUCCGGGAACGGGUCUCGGGCGGGGCCGGAGUCUGGGUAUGUAAGGUUGGCGGUGGCGGAGUCUGAGGCGUCGGUGGGAACUCACGAGCCUCGCACGCAG
rno-novel-mir-510	chr10:-:39404590:39404697	AUGCCGCUUCCCCACUCUGAACUUCAGUUUCUCCUCUCCGGGCCUCAGUCAUUCUGGGGGAAGUGACCAAGAGGGGCUGUUGAAUUCCAGGCAAGGGGGAGACAAUGA
rno-novel-mir-511	chr10:-:39490993:39491102	AGCGAUGUCUUCUCUGAAGACUUCCAGGGUGCUGAAGACAGCUAACAGCUGGCUGCUCAGUGGCAGCCCUCCUGCACAGGGCGGCCAGAACAGGAAGGGUCCUGCUGUCA
rno-novel-mir-512	chr10:-:39491261:39491375	GCAGCUUGCUCCUGUAAGCCAAGAAGGGGUGUGUGGACCAAUCACAACACAGCUUCCUGGAGGGGGUGGAGAAAGAGGGAGGGAUGUGGUGGCUCUACUCAGCCUUAGGCACUAG
rno-novel-mir-513	chr10:-:39786384:39786491	GCGCUCGGCUGGGUGGCAGAAGAGAUCCUCCAGUACCCCGGCCCGCCUCUGGCCCUCCCAAGCUGCUAGGGCUCUAGGAGGAGACCUGGGUCUGCGACUUGAGGCGCG
rno-novel-mir-514	chr10:-:40051187:40051294	GAAUCCAGGGUGUAGGAACAUCUCGCUGGGGCCUCCACAUGCUAUAGAAGUAAUGUCUUCCCAGUGAGGAAUACUCUAUACACUCAGAUUAACGAACGGAAAGCUCUU
rno-novel-mir-515	chr10:-:40051188:40051296	AAGAAUCCAGGGUGUAGGAACAUCUCGCUGGGGCCUCCACAUGCUAUAGAAGUAAUGUCUUCCCAGUGAGGAAUACUCUAUACACUCAGAUUAACGAACGGAAAGCUCU
rno-novel-mir-516	chr10:-:40744040:40744149	GACAAUGACAAGUACAUUGCCCUGGAGGAAUGGGCCGGCUGCUUCGGCAUCAAGGAGCGUGAGUGUUGGGACUUGGGGGUGGGAAGAAGUGUCCCCAAGGGAUGGGAUAU
rno-novel-mir-517	chr10:-:40751159:40751269	GGGGUGGGAUGAGAAUCCCUGAACUCAUUUUUUUUUUCUCUUCCACGCCAGUUACCUGUGGGUGCCAACCCAGUCCAGGUGGAAAUGGGAGAGUUUGAAGAAGGUGCAGAG
rno-novel-mir-518	chr10:-:40751867:40751975	AGACACUUCAGAGAGGAAGCUGGCCUUGGCCUUGACCAACUCUCUGAACCCUGUUCUCUUUGCCAACAGCAGACGGAAGCUGCAGAAGAGAUGGUGGCGGAGGAAACCG
rno-novel-mir-519	chr10:-:40751868:40751976	GAGACACUUCAGAGAGGAAGCUGGCCUUGGCCUUGACCAACUCUCUGAACCCUGUUCUCUUUGCCAACAGCAGACGGAAGCUGCAGAAGAGAUGGUGGCGGAGGAAACC
rno-novel-mir-520	chr10:-:4088519:4088629	CAGGAAGUGAGCACUGCAGUAUCAUCGUGACUGCAGUACGGGUGUAGCAUACAGGAAGUGAGCACUGCAGUAUCAGUGACUGCAGUAUGUGUGUAACAUACAGGAAGUGAG
rno-novel-mir-521	chr10:-:41923281:41923389	CCAGUCUCCUAAUCCUGCGGUGAAGUAUGUCCUCCAGCAGACCCUUUCCCUCUCUGCCUCUGGGUCUUGACUGGAAGAACAUAUUCUAUCACCUCUAAGGCCCCUGUUG
rno-novel-mir-522	chr10:-:42666712:42666822	AAUGCUUAGUGAGUGAGUAAGUGAGCAAAGGACUUCAGAGAAGCACAAGGCUGGAGUAGAAUGCUGACUGAGAAAAGGGCUGUAGGAGAUGACGGAUGGGCUCAGCUCAAG
rno-novel-mir-523	chr10:-:42707766:42707879	CCUUUCCACGUGCAUGGGAGAUGAGCCAGGCGGCAUUGUAAGCUGACCUCUGUCUUGAGCUUACUCAAGCCUGUGCUCAGUUACGUAGGGGAGCUUACCUAUGGUGAAGUUUAA
rno-novel-mir-524	chr10:-:42987081:42987188	GAGAGCAGUCAAAUGGGAAGAUCAAUCUGAGGGUGGGUUAAACUAUCCAUGCAUGUAGCCCGCCCUUCUCGCAGGUUAUCACACCCCCUGCUCGAUCCUCUCAGCCCU
rno-novel-mir-525	chr10:-:43052863:43052973	GGAGAGUUGGCAUGCCAGUUAUUAAGGAUGUGAGGCAGAAGUUGUGAGGAGAAGGGAGCGUUUGCCUUCGCUUCCUUUCCCCCAACUUGUUCAUUUCCUAUGAGCCAACUG
rno-novel-mir-526	chr10:-:4312668:4312775	CAUCUGUCGCUGAGUGGGGGCAGGGGCAGGCUGUACUCAGCUCGGGCAGGGCUGUGGGCCGUGCCCUUCCGCAGCGACGAUCCAUCCCAGCCUGUGAGCACACACAGU
rno-novel-mir-527	chr10:-:4312718:4312825	GCGGCUGGAGCUCCCGGCAGGCAGCGCGAGGAGGCUGAGGUCUGGUGGCCCAUCUGUCGCUGAGUGGGGGCAGGGGCAGGCUGUACUCAGCUCGGGCAGGGCUGUGGG
rno-novel-mir-528	chr10:-:43537892:43538002	GCCUCAGACGGCGUCAAGCUGUGUAAAUUGGAUCCCCUUCUGGGUUCUGAAAUAUCCUAAGUCGCGCCUCGGGAGAAGACGGAAUCUAGAGUUGGCCCCACUUCCUGACAU
rno-novel-mir-529	chr10:-:4411140:4411247	CAUCUGUCGCUGAGUGGGGGCAGGGGCAGGCUGUACUCAGCUCGGGCAGGGCUGUGGGCCGUGCCCUUCCGCAGCGACGAUCCAUCCCAGCCUGUGAGCACACACAGU
rno-novel-mir-530	chr10:-:4411190:4411297	GCGGCUGGAGCUCCCGGCAGGCAGCGCGAGGAGGCUGAGGUCUGGUGGCCCAUCUGUCGCUGAGUGGGGGCAGGGGCAGGCUGUACUCAGCUCGGGCAGGGCUGUGGG
rno-novel-mir-531	chr10:-:45243584:45243691	CUCACGCCAUCUUUACAUUUGAUCCGUCAGCUGAGCCUGGCAGUCCGGGCGUCUCAGGCCUGUCAGCUGCCGGAGGCGGACUGGGGCGCCAUGGUGAGUGCUGCCCGC
rno-novel-mir-532	chr10:-:45243619:45243726	GGCCUUCGCGGGUUCGCUAGUUCGCGGGUCUUUGUCUCACGCCAUCUUUACAUUUGAUCCGUCAGCUGAGCCUGGCAGUCCGGGCGUCUCAGGCCUGUCAGCUGCCGG
rno-novel-mir-533	chr10:-:45289427:45289535	ACAUAGAUGGUUUAGCGUCUCCCCUGACUGUGGACCUGGCUGUGAGGGAACUAGGCAGCCCGGGUCUGAUCCUUGUUAAGCUAAAUCGCUAGCCAUUUCGUUCUCACCC
rno-novel-mir-534	chr10:-:45527070:45527180	AUACUACACAGGAAUGACCUCUCUGCUGGGCCUGCCAGCCCUUCCUUCUGGGCUCUUAUGCAGUUUCCCCAUAGGAUUGGAGGUGUCUGGCAUGAAUCCUCACAGAGAGAG
rno-novel-mir-535	chr10:-:45564515:45564625	AUUCCCACCAUUGGUGAGAAGCUGGGCCAGGGUGGGGGUAGGGUGUGGGGAUCCAGAGUAUAGAGGGCCCUCAGCUACAACCCUGACCCCCAGGUUUCAACGUGGAGACUG
rno-novel-mir-536	chr10:-:45564552:45564664	AUUCUAUACAAACUGAAGCUGGGCGAAAUUGUGACCACCAUUCCCACCAUUGGUGAGAAGCUGGGCCAGGGUGGGGGUAGGGUGUGGGGAUCCAGAGUAUAGAGGGCCCUCAG
rno-novel-mir-537	chr10:-:45802339:45802452	GGCUUUUGGUUUGUGUCUUGUGGAGUCCUGCAUGGAGCCUGUUUACUUAUUUUUUUAUAGGCCUCUAGGCAGAUACCCCAUAUAGUCACACCUCCCAUCUCACCUGCACCAGGU
rno-novel-mir-538	chr10:-:46018149:46018256	GGGCGCAAGGUAACUUGUCCAGGCUGGGAAGGUGGAGGCGCUGGGAUGGAACUUUCAGGUUUGGUGGACUGGCGCUGCCGCCCGCGGCCUGACAGCUGCGGCGCUGGG
rno-novel-mir-539	chr10:-:46070371:46070481	CUUGGGAGGUUGACGAUGCCAGCAAGGCACUCUGAGCAACCUAGAUCUCAAGUUAGAGUGCUUCUGGGACGGGGGACGCAGACUUCCAAGGUCGUCCAUGCCUGUGUCUGC
rno-novel-mir-540	chr10:-:4644433:4644540	GCAGAGCUGCUGCUGGCUGAUUGCACCGGACUGCGGGCCGCGACAUGGUGAGCAGGGAUGGGCAGAGCAGGCGGGUAGGGUGAAGGGACGCUCCGGAUGGUCCGGGGU
rno-novel-mir-541	chr10:-:46576280:46576390	ACUGUUUGGCUGGGGCAUCCUCACUCCCUCUGAUGCUUCGGGUGUGCACCGUAGUUCUGGGCGCAGCAUGCUGGAGGCCGAGAGCAGAGGUGAGUCAGGCCAGCCAGGCAG
rno-novel-mir-542	chr10:-:46582545:46582654	UGUUUAGGAACUGACCACAGCACCUUGCAACUCAGACAACUUUCUCCACAUCCUCUGCUUUCCCUCUGCGCAGGGUCUGGAGAAAGAAACAAGAGGGCCACUGUCCUGUC
rno-novel-mir-543	chr10:-:46666288:46666397	GCUUCUUUGUUUGGGGUAGGGGUGGAUGUGAUGCCCUAAUGAGGCCCUGUGGAAUCCUGGCUCACACACAGCAGCCUGCAGGGUGGAACUCUCCAGGCAGGAAAGCAAGU
rno-novel-mir-544	chr10:-:46783007:46783114	UCACAGAGCAGACUGGUUGAAGUUGUGGAGGCAAAGAUUAGCUUGACUGCUUUUUGUCUCCAGGACCCAGCCAACACAAGACUUGGCACAGAGCAGGCUGGCUUUAAG
rno-novel-mir-545	chr10:-:46961996:46962106	GUCUCAGUUUCUCCAUAGAGUCAAGUCCUGCUCCUAUGUCCCCAGGAAAGCACAGAUGCCCGAGCACCUGGGGGAAAGGUACGGCGCUGGGACCAGGGCCUGGAGAAGCCA
rno-novel-mir-546	chr10:-:47283473:47283582	GAGGAGGAGGCAACUGAUCUCAGCGGCAAGUGGGCACCGAGGCCAUCCAGAGAGCUGAAGCCUCUAACCAGUGCUCAGGAGGUGGAUGCCAAGGCCAGAAAGUCCCUAGA
rno-novel-mir-547	chr10:-:47295257:47295368	AUCCAUCUAUAGGAAAGGGCUGAGAAGAUCAAAUGAGCAGCUGUAGCCUUGACCAGCGAGCUCUCCUUUGAUAUUCUCAGAAAACCAAACCAUCCACAAAGUCUGAGGCUUU
rno-novel-mir-548	chr10:-:47428219:47428332	GUGGCUGCGUGAGAUUUGAAGCUGAGUGGUCCAGGUGGAGACUGCAUUGCAUAGUGUCACCCGCUUGCCUCUGCUCUGUGUUCACUACAGUUUCAGUCACAGCCAGAAUAAGAA
rno-novel-mir-549	chr10:-:47428396:47428507	UGUUGAUCAGUGUUGUUUCCUUGCCCUGUGCCCUGACUUCCUUCCCACACGGCUGGUGGCCAGGGAUCGGGGCCUAGUAUCUUGAUCUUUGCAGUAGAUUCCUUCAUGGUCC
rno-novel-mir-550	chr10:-:47722416:47722529	UGAGAAGGACAGCUCCAGGGAAAGGACAAAGAAAAGGGUUAGGCAGAGCAAGGCAGGCCUAACCCUUUGGUCUGCGUCCUUAAUAGGUGGCUGUGUUCUUAGUGGACACAGGAG
rno-novel-mir-551	chr10:-:47722419:47722529	UGAGAAGGACAGCUCCAGGGAAAGGACAAAGAAAAGGGUUAGGCAGAGCAAGGCAGGCCUAACCCUUUGGUCUGCGUCCUUAAUAGGUGGCUGUGUUCUUAGUGGACACAG
rno-novel-mir-552	chr10:-:47722419:47722530	AUGAGAAGGACAGCUCCAGGGAAAGGACAAAGAAAAGGGUUAGGCAGAGCAAGGCAGGCCUAACCCUUUGGUCUGCGUCCUUAAUAGGUGGCUGUGUUCUUAGUGGACACAG
rno-novel-mir-553	chr10:-:47723370:47723477	AGCGUCCCUCCCCACCCCGGGAGUCGCCUACCUGCUCCAUCUGUCUGGAAAGGCUUCGAGAGCCUAUCUCACUGGACUGUGGCCACGACUUCUGCAUCCGAUGCUUCA
rno-novel-mir-554	chr10:-:48860846:48860955	GGCCGGCGGGAGCGCGCCGAGCUGAGAGGCCUGUGAGCCCAGCUGAGGGAGACAUGCGGCGGACUCGCAGCGCGGUGGCCACUGACCCGCGGGAGCAGCGGCGCUCGGGG
rno-novel-mir-555	chr10:-:48860896:48861005	CGCGCACCACCCCCGGGGCCUUCAGGUUGUCGGAGGCGGGGACGCGCAUAGGCCGGCGGGAGCGCGCCGAGCUGAGAGGCCUGUGAGCCCAGCUGAGGGAGACAUGCGGC
rno-novel-mir-556	chr10:-:49380112:49380219	CCCUGCUAAACCUAAUCAGUGCGGUGCACAGGGCUCUCCACACACACAGUGAGGAGCGCAGCUCGCACUAGGGGACCCUCUGCAUAGCUUGGGAGCAAAGGCAAAUCC
rno-novel-mir-557	chr10:-:50404194:50404303	GCAAGAGCGCAUAGGUCGGGUGGCAGUCGCUCGGUCAUCUGUAUCCUCUUUGGUCACCCCAAUGGCUAGGAUACAGAUGACCGAGCCGCACUUUCAAAUCUGAGAUGCGC
rno-novel-mir-558	chr10:-:5054629:5054741	CAAACCCAGUUCUGUAUGUGAAGGGAGCUGGACAGCUGAGCCAGGCCUUAUUCUGCUCUCUGCUCUCUCCCUAGAUAACAGUGACUUGAUUGCAUGCACAGUCAUCACCAAGG
rno-novel-mir-559	chr10:-:5054631:5054742	CCAAACCCAGUUCUGUAUGUGAAGGGAGCUGGACAGCUGAGCCAGGCCUUAUUCUGCUCUCUGCUCUCUCCCUAGAUAACAGUGACUUGAUUGCAUGCACAGUCAUCACCAA
rno-novel-mir-560	chr10:-:51478008:51478117	AGUGCAAGUACUCGAAAGGCAUUACUGGGAAAGGAGUGAGUCUUUCAGGUUCAUCUUCUGCUGUUAGGAGCUGUGCCCUUCGACAAAAGUACUCCAAACUUUGCAUUGUU
rno-novel-mir-561	chr10:-:51669181:51669289	GAGCCAUGUAACCCUGCGGCGGGCUCCGGGCAGCUCCGUCUUUCCCCAGCUCCCGGGCUAGCGCGGCAGCGGGGCCACGAUGAAGAAGCAGUUUAACCGUAUGCGCCAG
rno-novel-mir-562	chr10:-:52301837:52301944	GGCCGAGCUUGCUGCAUUGCAGCCGCCGCGGCGCCGCUCGGCUCCUCAUUUCCAACAAUGGCGGCUCCGAGCCCGAGCGGCGGCGGCGGCUCNNNNNNNNNNNNNNNN
rno-novel-mir-563	chr10:-:53589925:53590036	GCAAAAAUAACAACCGCUUUUUGGAGAGAAGAGAUCACUGGGACUAAACCUUCUCUAAGAGAUCACCUAAAGGUUCUGAGUUUAACUCUCCAAACAGCCAGCUCAUGUGUCA
rno-novel-mir-564	chr10:-:53595736:53595843	CGAGCUUCCGCUUCCGCCGGAAGUCGAGGAGGCCGCUCUUUCCUCUGGGCUCGGUGGUGACUCUAUUUGCCCUCAGGUUGUGGAAGAGUCCUAGGUCGUGCUGCUGCU
rno-novel-mir-565	chr10:-:55076366:55076474	UGGGUGGCCGAGCCCUCCAGGGGCCGAGAUUCUGCCUUGAGGGACUGCUGUGGUAGAUGGGGCAGCCAAGCCGGGUGGGAGAGGUGGUGGGGUAAAGGAAGCCACCUCU
rno-novel-mir-566	chr10:-:55446510:55446622	UCUUGGAAUUGAUUUUGUAUUACCUUUUUUGGGUAUGAGAUGGGCCAAAGUCCAGCAUUUUCACUAGCUGGAGUUUGGACCCAGAUCUCUCUUUUGGUAGCUGAUCACACAUU
rno-novel-mir-567	chr10:-:55577965:55578077	ACAGCAGUGUGUCGGGCCCCUGCAGACUCCUCUGGCUGAUGUGGCUGUUGUAGCACUGAGUCACCAGGAGCUUGUAGGGGCCGCCACAGCCCUGGGAGAGCAGCCAGUCAAGA
rno-novel-mir-568	chr10:-:55577966:55578077	ACAGCAGUGUGUCGGGCCCCUGCAGACUCCUCUGGCUGAUGUGGCUGUUGUAGCACUGAGUCACCAGGAGCUUGUAGGGGCCGCCACAGCCCUGGGAGAGCAGCCAGUCAAG
rno-novel-mir-569	chr10:-:55593644:55593754	GAAUGGAAUGGGUACCUCUGCUAGACUUGUUCUCCCUCCUGCUUCCUAAGCUGGCAGAAUACUAGCAGUUCUCCAGACUCGAUCCCAAGAGGUCAAAAUUAACCAUUCCUU
rno-novel-mir-570	chr10:-:55653652:55653761	UGCCUUGGGCGCCAGGAGAUGAGGGAACGAAGGAGUAGAGCUUCAGCACCGAGCUUUGCCCCACAGUCUCGCCAAGCCCUCCCCGCCCCCCCCCCACAGCCCCUGGUUGU
rno-novel-mir-571	chr10:-:55681271:55681383	GUACGCAGGCGUAGAUCUGACAGACUGUGGCGUAGUGAGGAUACUUUAGAGACUCUGGCAUUACAAGAGGCUCCUGGUGCCAGAGCUUUGUAUCUCUAAUGAUCCCCAAAGCU
rno-novel-mir-572	chr10:-:55950185:55950296	UUCUAGUUCAAGCUGGGGUGAUAUAGAGGAAACUGGAGCUUCCUAUGGGACCAGUGCCAGGAACUGACCCUUGUCCCUGGAAACUCCUUCCCAGGUGCAAGAGUUUGAGCAU
rno-novel-mir-573	chr10:-:56012488:56012595	GGGGGAUGGUUUUCGGAGUGACUCACUCUCCCCCACCCCAAGCCUGAUUCAGACCCUGAGAAAGGCUUUGUUCGUGGGGCGGAUGGGAAGUCAGGCGCCUGUGUCCCU
rno-novel-mir-574	chr10:-:56075684:56075794	UUGCAAAGGACUUUAAUGUCUCCGUUGCCUUUCUGCUGAGUCUUCCCAGGCACUGCAGGGAGUCUGAAAGUCCCUGGGCUGACUCAUACUUUUUCUUCUGCUUUUCUCAGC
rno-novel-mir-575	chr10:-:56154632:56154739	CUUCACCCGGUUCCCCCGCCCCGUGCCUCCCAGCAAUACUAGUCCCCAAUCCGGGGUAAGAAGCGGGAGCAGCAGGAGGGCAGGGGUGCUCCAGCCCCGGUUUUUCCC
rno-novel-mir-576	chr10:-:56206091:56206203	GUGGCCACCUUGGAAACGUCAGCUGGCUGGGGGGGACUCCCUGAGCCCAGAUCUACCCACCCCCAUCCUCUCUCUGGCUACUCCUUGCAAGUUGCUAACGGGUCACUAAUGUC
rno-novel-mir-577	chr10:-:56272881:56272993	GGUAAAACAGAUGGUGUUGGAGGGACGGUGGCUCGGUUGUGAUUUGAUUGUACAGUGCACUCAAUCAUGGCUGGGGCAUUUUUCCCACUAGGUAGUUUUGCUGUCUGCCACAA
rno-novel-mir-578	chr10:-:56453604:56453711	CUGCAGAGGCGUGGAGACCUGGGCUGUCGGAGGGUGAUUGCGGCCCUAUCCCCAGCAACAAGACCCUCGCCUUUUCAGCGGGUGGCGGUUCUGCCUCCCCACCGCGUG
rno-novel-mir-579	chr10:-:56453608:56453715	CCGACUGCAGAGGCGUGGAGACCUGGGCUGUCGGAGGGUGAUUGCGGCCCUAUCCCCAGCAACAAGACCCUCGCCUUUUCAGCGGGUGGCGGUUCUGCCUCCCCACCG
rno-novel-mir-580	chr10:-:56453608:56453717	CUCCGACUGCAGAGGCGUGGAGACCUGGGCUGUCGGAGGGUGAUUGCGGCCCUAUCCCCAGCAACAAGACCCUCGCCUUUUCAGCGGGUGGCGGUUCUGCCUCCCCACCG
rno-novel-mir-581	chr10:-:56453654:56453761	CUUGGACCUUGUGCGCCUCGUUCGCCCUGGUCCCGCCCCUUCCGCUCCGACUGCAGAGGCGUGGAGACCUGGGCUGUCGGAGGGUGAUUGCGGCCCUAUCCCCAGCAA
rno-novel-mir-582	chr10:-:56453658:56453765	GGACCUUGGACCUUGUGCGCCUCGUUCGCCCUGGUCCCGCCCCUUCCGCUCCGACUGCAGAGGCGUGGAGACCUGGGCUGUCGGAGGGUGAUUGCGGCCCUAUCCCCA
rno-novel-mir-583	chr10:-:56453658:56453767	GCGGACCUUGGACCUUGUGCGCCUCGUUCGCCCUGGUCCCGCCCCUUCCGCUCCGACUGCAGAGGCGUGGAGACCUGGGCUGUCGGAGGGUGAUUGCGGCCCUAUCCCCA
rno-novel-mir-584	chr10:-:56511719:56511826	AACCCUACUCAGAGGCUCUCGCUGGUGUUGUGGGGCUGUGACGUCACAAGGCUCCUCGCCUCUGGCCAGGCCCCUUGACUGUGAUUGGUUGAUUCGGAGAAGGGCAGU
rno-novel-mir-585	chr10:-:56531469:56531579	GCGCGGCUGUCAUAGGGCUGCUUGGUUGGUCAGUGGGGAGUCGGCGCCUGCGUACUAAGACCCGUGUCGUCGUCGCCGCCGCCGCGAUCUCCGCCGCCGCCGCCGCCGUCG
rno-novel-mir-586	chr10:-:56827630:56827742	CUCCUUUGCUCUCCUCAGCUUUGCUGAGGGCUCCAGGAGAUCUCAUUCCACUGAGUCCUGAAUCAAAGCUGAAAGUCAAAGGCCAGGAGUCUCCUCAUGUUUUUGUGAUUUCU
rno-novel-mir-587	chr10:-:56831005:56831113	GGCGCAGGCGCCACAUGCUUUAUCAGUAACUUCCUGGCGACCAGCCCCAGCUUAGCGCCAAGCGUCCUGCAGGGUUGGUGGGAGGGCCAAAGUGAGCGGUUUAAAGCCC
rno-novel-mir-588	chr10:-:56831279:56831386	CAGCCCCUCCGGACCCACCCCCUGCUCUGAAGAACUGCAUCCUAAUUGGCGAGCCAAGUGUUGGAUGUGGCCCACUUAGGCAGGUGGUGAUUCUUCAAAGAUAACAUA
rno-novel-mir-589	chr10:-:56844941:56845054	CUCCCAUACCCUCGCUCUAACACCACAGUGUGGUUUGGACGUGGCCACAGUGCCGUACAAACCACAGUGUGCUGCUGGGGCGGGAGCAGGACUGGGGUGUGUCGAGAGGAAGAC
rno-novel-mir-590	chr10:-:56846926:56847035	UUUCCUACUUUGUUCCUAGUUUUGUUAGCAUUUCCUUGAAGACUGAAAGACCAUAAAUGUGGCAGUUGGUUGGAAGUUCAGGAAAUGCAGUGGUCACUAGGAAGGACCUG
rno-novel-mir-591	chr10:-:56847759:56847870	GGAGAGAUCUUUUCCGCGGCCGGCGCCGCCUUCACGAAGCUCGGGGAGUUGACGAUGCAGCUGCAUCCAGUAUCGGACUCUUCCCCUGCCGGGUACGUGAGACCAGACUAAG
rno-novel-mir-592	chr10:-:57127370:57127480	CUAGAUCCCACCCCAGAAAAGCCUUCCUGUUCAGUCUCAGGUCGUCGCGGUAUCAAGCCAGCUGAAGCAGGCCGUGGCUGGCCAGGAGGCCCUGGGUACGAUUGUACACAU
rno-novel-mir-593	chr10:-:57266610:57266720	AGGGAAGAAGGAGUCCCCACACUGUGGCGGGUGAGCGAAAGGGUUGGAGUCUUAGGGGAUGUUGGGUUAGAUCUCUGGCCUUUUUGACUCUUGUCUCUGUUGUCUCCAUCU
rno-novel-mir-594	chr10:-:57302712:57302823	GAGCCCCAGGCCGCUGCACGGGGUCUCCCUCCACAGUCGGGAGCAAGUGGGAGAAGAGGAAACAAAUUCUUUAUCCAAGAUGAUGAUAGUGGGGAGGAACUCAAGGGUCCAG
rno-novel-mir-595	chr10:-:57409741:57409852	UUUUCCAGUAACCACCCUUGUGUUUACCCACUCAGAGUCCUUCCGUUGAGGACACUGUUACCAACACUGCCAUUGGGGGGACCCUGCUUUGGACCUAACACAAACAAAUAUU
rno-novel-mir-596	chr10:-:57653244:57653355	UACUGGCGGAAGGGGAAGGGGGGGCAGGCGCGGUGGGAAAGAUGGCGUACCAGAGUCUCCGGCUGGAGUACCUGCAGAUCCCGCCGGUCAGCCGCGCCUACACUACCGCCUG
rno-novel-mir-597	chr10:-:58332347:58332455	GCAGGCAGUGGCAAGGCACCCUGGUGGGCAAAGGACUUGGUGAAGUUUACACAGCAGAGUCUUGGGUCUGGGGAUGAAGGCUGAAUUCUCGAGCCUUGGGAGUUUGGUG
rno-novel-mir-598	chr10:-:58743722:58743832	UAGAGGGCCAAGUGUCUUUCUGGUGUGGGAGGCUGAAGGACAGACAGAUGAGCCUGUAGACAGAGCCUGGUCUCACUGCUCGGCCCUCUCCACCUCCAGACCAUCACACAG
rno-novel-mir-599	chr10:-:59013472:59013583	UCAUUGGCUUUGUGAGUGUCUGGGGGUGGGGCUUGCCUGGUGUGGGGCACAGAAGACAGUCCUGUCCUGACACCCAUACCUCAAUCUCCACAGAUCUCGGACCUAAUCCGCC
rno-novel-mir-600	chr10:-:59049368:59049475	ACAGUAGCAGCAGCGCAGCCAGGGCUGGAGCCCGAGCGCAGAAGCCGAGCCCGGCCCGGCCCUACCACGUCGCCGCCGAGGCGCCGCGCGCGUGCGUGACUCGCCCGG
rno-novel-mir-601	chr10:-:59868069:59868179	UCCAAGACCAGAGUGCCUCAUUCUAGUUCUUUUCCUCAGCACCUGGCCCCAUGCCUCAAGCAGUAAGCAUCCAGGCCAGGUUCUGAAAGGAAAGAAUAAAUUCAUGAAUGU
rno-novel-mir-602	chr10:-:61421662:61421769	GGCCCGGCCUGCUUUCCCAGUUGCCACUGCCUGUUCAGCGCCUACUCAGGAUCCCCUGGGGCGCUGGGCGUGGCGGCUGGGCUCUCGCUGGUCCCUCGCUGUGGGCCU
rno-novel-mir-603	chr10:-:61421662:61421771	CCGGCCCGGCCUGCUUUCCCAGUUGCCACUGCCUGUUCAGCGCCUACUCAGGAUCCCCUGGGGCGCUGGGCGUGGCGGCUGGGCUCUCGCUGGUCCCUCGCUGUGGGCCU
rno-novel-mir-604	chr10:-:61421669:61421776	CCCGCCCGGCCCGGCCUGCUUUCCCAGUUGCCACUGCCUGUUCAGCGCCUACUCAGGAUCCCCUGGGGCGCUGGGCGUGGCGGCUGGGCUCUCGCUGGUCCCUCGCUG
rno-novel-mir-605	chr10:-:61714718:61714828	CUGCAGCUCUGGGCAGAGACGGGCAUGCUGCAGGGCACUUGGGGGAGAAAGCCUGUGCAGGCCUUAACCUCGGCCCCUUCCUGCCCUCAGAUGCCGGCGACAUGAUUGAGA
rno-novel-mir-606	chr10:-:62014983:62015093	GCGUGGGCGUGCUGCGGGGCGACCAUGGCUGUAGACUGUUACCUCCGGUUCCCACAGUAACAAUCGAAAGCCACGGUUGCCCUGGAGACGCGGGGGCGGGGCUUUCAGGCU
rno-novel-mir-607	chr10:-:62032339:62032446	GAUUGUGCUGUCUGCACUCUCCGCACUCUUCCGGCGCUGCCUUUUUGUUCCCCACGUGGGCUCUUGAGUGAUGGCGGCGCUGGUUGUGCCCGAGACUUCCGAGCCAGG
rno-novel-mir-608	chr10:-:62035832:62035939	UCUCUCAGCCCCGGGGCGAGUGGCUUGCUCCACCGAGCCGGCGGCCUGAUUCUGCCGCCCCAAACACUUUGCAGGCGGUUUUGAGGGGGGACGCCGCCCCCUGGCCGG
rno-novel-mir-609	chr10:-:62131501:62131611	UAAAGGCGGAUUAGGCCUCAGCCCUGGGUCUUGGUGCAGCUGGCUCACCCUGGCCGCUCCUUCCUCAAGCCAAUGUCAGCUGUGCCAGUUUUCCAAAACGAUUGGUUCACC
rno-novel-mir-610	chr10:-:62644559:62644673	CUCUGCGGUUGUGGUUCUGCUCUGACUCGAAUAUCAGCAGCUGGGGAAGCAGGCUGUCCCAGUUGCCUAGCUCUCCCCAGUCUGAAAGCCAACAGAGGCAGGAGAUGCUGGGCCG
rno-novel-mir-611	chr10:-:62692552:62692660	GUCCCUCUCUGUCCCUUACCUUGGGCAGAGGAAGCGCUUAGCAUUAGUGUGAUGCCUGGGGAUGCUGAGGGGCUUAGUAGGCCUGACCUCACAAGAACAGUGAUUCAAC
rno-novel-mir-612	chr10:-:62814441:62814548	GAAGGCUUGCUGGCAGCGCCGGGCUGCCCAGACAGCGGAGUCCCGGGGCUUCGGCGGCUGCCUCGGAACUCCCGGGCGGACCCAGGUCAGCUGCCGGGAACCAGCGUC
rno-novel-mir-613	chr10:-:63098340:63098452	CGCGGGUUAGGAAGCAAGACUGAGGGGCCUCAGACCGAGCUUUUGGAAAAUAGAAAAGUCUCGCUCUCUGCCCCUCAGCCUAACUUCCUUUAUUUCCUCACAAGUUUCUCAAA
rno-novel-mir-614	chr10:-:63884622:63884729	GAGGUGGGAUGUGGGCGGCCUGCUGGCUGGCGAGCGUCUGCAACCUAAGGACACCGGAGGGGUCAAAUUCCUAGGCCCGGAGACUCCCACCGCUUCGGGAGCCCGCAG
rno-novel-mir-615	chr10:-:64566385:64566493	GAGGCUAUCCUAGUGGAGUACAGCCUCCUGGAGGGCAGCUUCUGUGGCUGAAUCAGGUGUCCAGGUGAAAACAGGAACCUGGAACCACACAUACCUCGUGGUAUUUUUG
rno-novel-mir-616	chr10:-:65020441:65020551	CAGGGGAAGGGGCUGGCCACAUGCAGGGCAGAGAAGUGGGGCUCACUGUGUGGUAGUGGCCCAUCCAGCUCUGACCCAGGCUCUUCCCACUAAGGGCUCUCAAGUCCAGCC
rno-novel-mir-617	chr10:-:65025320:65025431	CUGGGCAGCUGUUUCUGGGGCAUUCUGGAGCCCAUGCCUUGGGGAUAAGCUGUUCUUGGUUUUCCUGAUGUCCCCUGGGUCUGUGCUCUGCAGUGGAGAAGUGGCAGGCUCU
rno-novel-mir-618	chr10:-:65025321:65025431	CUGGGCAGCUGUUUCUGGGGCAUUCUGGAGCCCAUGCCUUGGGGAUAAGCUGUUCUUGGUUUUCCUGAUGUCCCCUGGGUCUGUGCUCUGCAGUGGAGAAGUGGCAGGCUC
rno-novel-mir-619	chr10:-:65305979:65306088	AUGGGGACAGCGAGAACAUUACUGACUCUGGUGCCUUAUUUCGUAGGGACCAGAAGUGCUGCGAGUUCAGGCCAUCUCUGGCUAUCUUCCCUUCUCUCCUGUCUGCCUUC
rno-novel-mir-620	chr10:-:65418885:65418995	UCAAGGGCUGGAAAUGUGAUCCCAGGGCCUGUCUCCCCUCCUGGGCAGGGCGGACAUGCCUUGGUGCCAGCCACGUUCUACCUGGACUGAGGUGCCUGCUCAGGUGCUAUA
rno-novel-mir-621	chr10:-:65418930:65419039	GGUGCUUCAGCCCUGGCCCCUGGGGGGAGCAGGUCUCGGGGUUAUCAAGGGCUGGAAAUGUGAUCCCAGGGCCUGUCUCCCCUCCUGGGCAGGGCGGACAUGCCUUGGUG
rno-novel-mir-622	chr10:-:65418935:65419045	CCAAUUGGUGCUUCAGCCCUGGCCCCUGGGGGGAGCAGGUCUCGGGGUUAUCAAGGGCUGGAAAUGUGAUCCCAGGGCCUGUCUCCCCUCCUGGGCAGGGCGGACAUGCCU
rno-novel-mir-623	chr10:-:65424700:65424809	GGGGAAACGCGGCCCGAGCGAGGCGCGCGGGCUGUGGGGCCGCCGCGUGCCCGGCCCCGCUCGCCCGUGCCCGGCGCCCGCCCGCCAUGCCCGGCUUCGACUACAAGUUC
rno-novel-mir-624	chr10:-:65424750:65424859	GGGUUGCGGACCCGGGCCGGUCUCGGCCGCCAGUCGGCGCCGCCCGCAGCGGGGAAACGCGGCCCGAGCGAGGCGCGCGGGCUGUGGGGCCGCCGCGUGCCCGGCCCCGC
rno-novel-mir-625	chr10:-:65488354:65488464	UUUGCAGGUGGGCAUGCAGCAGUAGACCAGCAGGAAGGGUGACCUAGAUGCUGAGACACUCUCAUCUGCAGCUCCACUGUUGUCCCCACAGCCAGUUCCCUACACCAGAAG
rno-novel-mir-626	chr10:-:65488355:65488463	UUGCAGGUGGGCAUGCAGCAGUAGACCAGCAGGAAGGGUGACCUAGAUGCUGAGACACUCUCAUCUGCAGCUCCACUGUUGUCCCCACAGCCAGUUCCCUACACCAGAA
rno-novel-mir-627	chr10:-:65488355:65488464	UUUGCAGGUGGGCAUGCAGCAGUAGACCAGCAGGAAGGGUGACCUAGAUGCUGAGACACUCUCAUCUGCAGCUCCACUGUUGUCCCCACAGCCAGUUCCCUACACCAGAA
rno-novel-mir-628	chr10:-:65585814:65585928	AGUGGAAGCAAGAGAAUCAAGCGAAGAAAAGCAGUCAGCCCUGGCUUUAGCUGCCGCAGGAAGUGAAGGCUGCCUAGGCUGGAGGGCUGAUCUGCCUCCAUGAUUUCACCUGCCC
rno-novel-mir-629	chr10:-:65776041:65776148	UCCAGUGCCCAUCUGCCUUUGCUGGUCCAUUCUGGGGUCUACUGAGUCUGGCUUUUCUCAUUAGAAGUAAGUAGAAUCCAGGCCUUUCCCCCAGAUGGACUAUACUGC
rno-novel-mir-630	chr10:-:65791927:65792037	CCUAAGGAAGUGUGUGGCCAUCAACAGUGCUCAAGGGAUGAUAGACAGUCAGCUGCAUCCCUUGACCACUCUUGCGAUUGCCACAUGGGCACACAUAGCUCACCUCUUAGA
rno-novel-mir-631	chr10:-:65874128:65874239	CUCUCCAUUAAAAUAUAAAUAUGUCUCUAAACCUCCCCAGCUGGUGCGAGUGAAAUGCACCAGCUCUGGACGUUAGAGGCUCAGAUCUACAAAGGCUCGCCUAAUUGAGCCU
rno-novel-mir-632	chr10:-:66430764:66430871	GCAGGCCAAGCAGACUGAACCACUGUGGGACAAGAGAAUGACACGUUCUCCUGGGUUAGUCACAGCAUUUGACCAGGCUUUUCAUGACUUGAGUCUCCUUGGACCUGC
rno-novel-mir-633	chr10:-:66482151:66482258	UCGCUUUGCCGCCGCGUCUGAGUGGUAGGAGGAGCGGACUGAGCAGCAGGCUCUCGGGACUGCAGGCUUCGGAGGCACCGAGGGGCGCUCCUAGUGCAGCCUUCCCGG
rno-novel-mir-634	chr10:-:66482201:66482308	GCGGUCGCUUAAAGGCUCCGGCAACCACAGCCGUCGGGUCGCGGAGGCUUUCGCUUUGCCGCCGCGUCUGAGUGGUAGGAGGAGCGGACUGAGCAGCAGGCUCUCGGG
rno-novel-mir-635	chr10:-:67418153:67418263	AUCGCGCCUUCAUCUGGCCGCGCGGCCCGCCGGAUUCCCGACUGCGCCCGGCUCCCGCGAGCGACCCGAGCGGCCUCGGCACAGCNNNNNNNNNNNNNNNNNNNNNNNNNG
rno-novel-mir-636	chr10:-:67868430:67868538	UGCUUUGUGACCCCUACCUGAUGCCUCCUUCCACAACAUGAUUGGUCGGGAAUCUUGGAUCGAGUCUCGGGGAGUCGUGUUCGGGGCGGGGGUCGUCGGUCGGAAAGCC
rno-novel-mir-637	chr10:-:6858286:6858396	UAGUGUCCCCUAACAGAGCUACUUCAACGGAAACUAGCUCAUCUGUAGAGACUGAUUUGCAACCCUUCCGGGAAGCCAUAGCUCUGCAUGGUAAAGCCGUUUAACAUACUU
rno-novel-mir-638	chr10:-:6889948:6890055	CACUUCCUUCCUCGGCUUCUGAGCAGCAGUCUCUCCAGGCUGCACUCUUCCUGGGAGGCCCUGUGUGGGGAGUUCACCGACGGAAGACAGGAGCACCUAGGUAGUCAC
rno-novel-mir-639	chr10:-:68918163:68918270	GAGGGGGUGCGACUUCCUCCCCACCCAUCUGGGCACCAAGACGAGUCCAAACGGCCAUCUUUUUUUGCUGCCAGGAUGUGAGGAGCAGGUCCCUGCCUCUCCUUUCUU
rno-novel-mir-640	chr10:-:70247837:70247949	UCAGAACGUGUUGAGGAGGUGUCCGUGUCCAGCGCAGGGUUGUCAAGGUCCAACAGGCCCCUGGUGGCCAUUUGGGACUUAGACGAGCGGGUGCAGAUGGCCAGAUUAUCCUU
rno-novel-mir-641	chr10:-:70395305:70395416	AUCUUUGGCAGAAAAGAGAUGACGAUCGGUCAGGUGACCCUAAUUCUGCAAGCAAUGCCAGUUGACAGGAAGGCACAGGAUGGGGACACAGGAGUGGAAGAGUGUCUCUUGG
rno-novel-mir-642	chr10:-:7120960:7121069	CAGAGACGGAAGCUAAGGGGCAGGGAGAGAACUAGUACAGAGGGAAACCUCAGAUGCGGGAGCUCGCUCUAACCCUGCUGUACUUUCAUCUCCCCAGGUUACAACCAUCC
rno-novel-mir-643	chr10:-:72188097:72188206	GUGGCGGGUGCUUACGCUCGCGGGGUUUGGCUGUUGCAGGCAGGAGCUGCCUCCUCCGUCGUCGCCGUCCUCGUCGUCGCCGCCGCCGUCGUCGCCGUCGACCCUCCUCC
rno-novel-mir-644	chr10:-:72247431:72247538	CCAUUUUGUUUUUCAGGACUCUGCAAGGGUAGCUGGGGUGAAUUUGCACCCAGGUAGCAGCUGUACCGCAGUUCCAUCCUUGUCUCCGAGAUGCUGCCCUUGGCCAAA
rno-novel-mir-645	chr10:-:72505970:72506079	AGGCCUUAGAAGGGACCUUAGUGGGGAUGUCCCCCAGCAGGUGAGGCAAGCUCUCACCCUGACACAGCAACUUGGGGUUCAGACUUGAAUUUAUUCCUCGAACCGUGUUU
rno-novel-mir-646	chr10:-:72545025:72545132	UCUUCUGUUGGGAAUGUGAGGCUCUCGGUUCGGUCGUGCUCUGCGUUCGUCCGGAUCUUCCCUGUCCGCCGCUGCCGCGCCACUGCCACCGCUAGCACCGUCUGCCCU
rno-novel-mir-647	chr10:-:74069779:74069891	AUUUCUGCUUCCUGGAUUGCAAGAACUGCGCAUACCAGACCCCCCUUCCCAUUUUACUCAGUUCAUUCAUUUGGGUAGGGGCUAGGUGGGGGAGCUUCUCGCGCGUUUCUCCC
rno-novel-mir-648	chr10:-:74558552:74558661	CUCCAGGGCAUCAAAUCACUUGCAUGGUACCGUGCCCCACUCCUUAACUGUUUUGUCUGUCUCUGUUGACAGGACCAGGAGGAACAAGCAUACUUUGCAGUGUUUGAUGG
rno-novel-mir-649	chr10:-:75040358:75040467	ACUUGAGCAGCUGGCUGUUGACAGGCUGAGGGCAACAUGGUGCCUACCUCAAGAGCAGUGUCUGCCCCCAGCCUGGCAAGCCAUCCUGUCACCCUUAUUCUUAGGGAAAC
rno-novel-mir-650	chr10:-:75050829:75050941	CGUGAUCUCCGAAGCCCACAGUACACUCAUCCAUAAAGUAGGAAACACUACACCCUCCAGUGCUGUUAGUAGUGCUUUCUACUUUAUGGGUGACUGCACUGUCUGUCUGUCUG
rno-novel-mir-651	chr10:-:75365979:75366086	CACCUCAGCGGCCGGGCUCCGCCGGAGCGGGCGGGCGGAAAAACAAAGGGGGAUUAAGGCCCGGCCGGAGAGCGGAGCCGGGAGGGGAGGAGCCGGGCGGGCUCGGGC
rno-novel-mir-652	chr10:-:75523929:75524040	GUGGGCUGCGCCCUCCAGACCCCUCGCUCUCUGCUUCCAGCUAGAUUCUGGUUGAAGGUCCUGGCAGGGAGCAGAAGGAAGGAGUGUGGAGGUGAGCUUUGUCCCAUCUCCU
rno-novel-mir-653	chr10:-:75837989:75838097	GUGGCAGUAGGACGAAGGGUUUCUGGGAUCUGAGAGGAGUCUUCUGAUUUAUGUUCCUCUCAUGUAGGGCCCUUAACCUCUCUCUUCUGUUUUCUCUCUGUAUUCUGAG
rno-novel-mir-654	chr10:-:76007245:76007353	CAGUUAAGCAAGUGGAGAGUGGCCAUUUUGGGUGUGGAGGUGGCAGGAGAAGGAUUGGAGCUUAUUUUAUAACAGCCCCUGCCACCCAAGCUAGCUGAGUGUGUCAUAA
rno-novel-mir-655	chr10:-:76031460:76031570	UAAUUUGAAGCUGUGACAGACCUGAGGCUGAUAGGGAUCAAUCACUCCAUGUCCUUUCUUUGUCUCCUUUGGGUCCAAGUGUCAGCUGCCUGGAAGAGUUUUGUUCUAGCC
rno-novel-mir-656	chr10:-:76263813:76263920	UCCGGGGCGGGACACCGUCACGCGCUAGCCUUUGGCUCCUGCCUGUUGCUGAUGCUGAGGCGGGGUUUUCAUCAUGGAGCUGUCGCGGCGGAUUUGUCUCGUCCGACU
rno-novel-mir-657	chr10:-:76811973:76812085	CCUGCUAUUUAUAUCCCAAUGCCCUUCGCAUGGCGAAGCAGGGGGGAAAAGUUAUUUUUUUCUUAAAAGUACAAAGAGAGGGGGAACUUUUGUAGAAGGACUUUUAAAAAAGC
rno-novel-mir-658	chr10:-:76836187:76836297	AGGAGACUGGAGACACUGGGAGAGAGGGGUGAUGGAUGGAGGUCAGAAGGGAGAGGCCAGUGUGGCGAGGUCACUCCCAGUCUGGCUUUCUUUAACCUCACUUUUCUCUGG
rno-novel-mir-659	chr10:-:78802707:78802814	AUGAAACUUGAAAGAGAAUGUUCACAGACACAUACAUACAUGUACAAAUAUAUACACACUAUGUGUGUUGGUAUGUAUCUGUGUACAUGUAUGUACGUGUGUGUACGU
rno-novel-mir-660	chr10:-:81693434:81693541	GGCGUUCCCAGAGGAAAGGGAGGGGCUCUGGAGGAUGACAACUUUCCGAGGGAUAGCAAGCGUCUUUUCGCCUUUCUACAGCUCACCCAGCGCUUUCACGGUGCGCCA
rno-novel-mir-661	chr10:-:82026995:82027102	GGCGGCGGCCAUUUUGUCUUAUCGGCUCCUCUUUGGAAGAGGCUUUUCGGCUUGAGAGUGGGCCGAGGGGUUGGUUCGGCGGCCGAGUGGCUGGUGGUUUUCGUUGGU
rno-novel-mir-662	chr10:-:82131815:82131927	AGUGAGGGGGAAAGACCCCAAUGGGAAGGAAGACCUGAAGGGAAGCAUCAAAGACAAUCUCUACUCACCCUUCCGUGUCCCUUCCCUACAGGCUCCAUCUUGUCCGUUCACUC
rno-novel-mir-663	chr10:-:82131816:82131927	AGUGAGGGGGAAAGACCCCAAUGGGAAGGAAGACCUGAAGGGAAGCAUCAAAGACAAUCUCUACUCACCCUUCCGUGUCCCUUCCCUACAGGCUCCAUCUUGUCCGUUCACU
rno-novel-mir-664	chr10:-:82131816:82131929	GCAGUGAGGGGGAAAGACCCCAAUGGGAAGGAAGACCUGAAGGGAAGCAUCAAAGACAAUCUCUACUCACCCUUCCGUGUCCCUUCCCUACAGGCUCCAUCUUGUCCGUUCACU
rno-novel-mir-665	chr10:-:82802556:82802663	UGGGAGCAACCACAUGCACGUGGCAAGGGCAGCUGGGGGGGGGGCAUCCAAGGGGACCACUCACUUGGAUCGGUGCGGUGCUGAAAUGGAUCUUCCGGCUCGGGGCUG
rno-novel-mir-666	chr10:-:83059544:83059654	AAGAGUGGCUGGGAGUGUGGUGUGGACUGUGUGCUUCAGUGGGCGUUACAUGAAUACACUGGUGCCUUCCUGUCCACUCUAAGCUCCUCAGCACUGAACUGCUUUCUCUUC
rno-novel-mir-667	chr10:-:83078938:83079045	CCCGCAACCGGCCGAGCCCGGCAGCGCCCCCUAUCGGCUAAGUUCGGCAACAGCCCUCGCCGACUGAUGAAGGCAGGUUGAGAUCCGGAACAACCGCGCGUGGGCGGC
rno-novel-mir-668	chr10:-:83231717:83231824	AUGCGCAGUUUUCCAUCUCGCCGCAGGCGACAGCUCACUAUUUGGCAAGGGGGAUGGGGUUGGGGCUAUGAUGGUGAGGGAGGCAGGAGACAGGGGGCGCGUUUGUGU
rno-novel-mir-669	chr10:-:83636302:83636409	GCGAGUGGCGGGGAGACUGGGCGGGCGGGACGGGUGGAGCGUGGCGCGUCCCGUCCGAGGAGCGUGGGUGCGGGGCACCCUCUGCGUGCGCGUGGGCACGUGCGUGAG
rno-novel-mir-670	chr10:-:83636352:83636459	AAGGGGCGGGCUGCCAGCGAGCCACGCCUCCGGGCUGUCCCGGAGGCCGCGCGAGUGGCGGGGAGACUGGGCGGGCGGGACGGGUGGAGCGUGGCGCGUCCCGUCCGA
rno-novel-mir-671	chr10:-:84130110:84130221	UCCUCUACAGCUAUAAAACUGCAGCUUCGAUCGCCCCCGCCGCCCGACUGAAGCACGGUGGGGGUGACUAAGCUGAAAUGAGACCGAUUAUGGGUUGCUGUUGAUUUUUUUU
rno-novel-mir-672	chr10:-:84130110:84130222	UUCCUCUACAGCUAUAAAACUGCAGCUUCGAUCGCCCCCGCCGCCCGACUGAAGCACGGUGGGGGUGACUAAGCUGAAAUGAGACCGAUUAUGGGUUGCUGUUGAUUUUUUUU
rno-novel-mir-673	chr10:-:84915077:84915184	CGGCGCUUCCGGGGCUGGCAGAAGGCGCGGGCAGCGGGGCGAGCCUGGUACCCCUCCUUCGCCCCUUUGCCCGGGUCCCGCCGGGCCUUCAGCCUGCGCCCGAGUUUG
rno-novel-mir-674	chr10:-:84915079:84915190	GGAGGGCGGCGCUUCCGGGGCUGGCAGAAGGCGCGGGCAGCGGGGCGAGCCUGGUACCCCUCCUUCGCCCCUUUGCCCGGGUCCCGCCGGGCCUUCAGCCUGCGCCCGAGUU
rno-novel-mir-675	chr10:-:85071780:85071892	UGUUGUCACUGCAGGCCAGCUCUGUUCUCCCCCUCUGUACACCCUGGGAAACUGGAAUGGUGGCAGAGGGGUGGGAGGACCCUGCAGGCCUUGGAUGAUCCAGCCCAAAGGGG
rno-novel-mir-676	chr10:-:85071830:85071942	ACCGACCAGCUUGGGGCUCGUGGUACUGGGGAAAGAGGCAUCUUGUUUCUUGUUGUCACUGCAGGCCAGCUCUGUUCUCCCCCUCUGUACACCCUGGGAAACUGGAAUGGUGG
rno-novel-mir-677	chr10:-:85084724:85084835	CUGGCCGUCCAGAAGCGCUGGCCUUCCUUAGAUACAGGCGACAGAGGCCUGGGAUGGGAAUCUUGGCGGCUGUCGAGGUACUUGGGAAAAGGGGAGGUCUGGGGAGGAGACC
rno-novel-mir-678	chr10:-:85517598:85517709	GCAGCUCAACUGGCAGGGCCCUGUGGGGCGUGUGUGGCUGCUGGUGCGCGCCCCCAGCCCCACGCCUCCCCAUGCAGCCCUGGCAGUGCCUCCGGCGCUUUGCCCUGGCCUG
rno-novel-mir-679	chr10:-:85517606:85517714	CCUCCGCAGCUCAACUGGCAGGGCCCUGUGGGGCGUGUGUGGCUGCUGGUGCGCGCCCCCAGCCCCACGCCUCCCCAUGCAGCCCUGGCAGUGCCUCCGGCGCUUUGCC
rno-novel-mir-680	chr10:-:85517648:85517759	GGGGGCAGCAGGAUGCUGGUGGCAGUAGAGGGGGCCGGCCGGGUGCCUCCGCAGCUCAACUGGCAGGGCCCUGUGGGGCGUGUGUGGCUGCUGGUGCGCGCCCCCAGCCCCA
rno-novel-mir-681	chr10:-:85646286:85646397	UGCAACACGUGGGCUUGGAACUGGGCCUUGUAGGGCUGUUGCUGUAGCCGAGUAGGUAAUCUGGGAUUUACUGUGGUGCUGUAGGAGUUAGGCAUUUUACUCAAGCUAGCUG
rno-novel-mir-682	chr10:-:85744667:85744774	GCCGCACCGGGCACAGUUAGGGUUCAUGGUUCCGGGGAAAGACUGGGGCGGGAACGCCCGUGCUCGCGCGCGUUCCCUUUUCCUUGGGCGAGCUGGUAGGAGGAGGCG
rno-novel-mir-683	chr10:-:85744717:85744824	GAGCUCACCUUAUCCAGACAGUUCACCUUCUCCGUGGGGUACACGAUUUUGCCGCACCGGGCACAGUUAGGGUUCAUGGUUCCGGGGAAAGACUGGGGCGGGAACGCC
rno-novel-mir-684	chr10:-:86034843:86034950	CUUCUGUCAAUCCAGCCAGGGUUUACUUGUCUUCCCACCCACUUCCUCUUCCCAGAGCCCGUCAGGUUUAAGAUUCAAGAAGGGAGUGGGUCUGGGCAAAGAGACUGU
rno-novel-mir-685	chr10:-:86043223:86043334	GGUUACAAAGCACGGGCAGCGUCCAGAUCCCCAGAGCCACACAUGCACAGCACAUGCGUCCUCACCCCCAUCUGCUGUAGUGCUGUGGCCAUGGCACUGAAGCUCACACUGC
rno-novel-mir-686	chr10:-:86063041:86063149	AGACAUUUGCUCUUGUGGUGCUGGGAUUGAGUCUAGGGCCAGGCAUAAGGUAGGCCAGGCCUGACCCAGAGACACACUGCCAGUACUUUGAGGGCAAAACAAAACAAAA
rno-novel-mir-687	chr10:-:86308749:86308856	GCCAGACACUUGCCCUUACCCAGAAAGGGCUAAGCUUGCCAAACAGAACCAUCUCAGUGCAGAAGGGCCUCUGGGCUGUGGGAGAGGCAGUAGCAGGCAGGCAAUCGG
rno-novel-mir-688	chr10:-:86685334:86685444	CCAAACCCACUGCAUCCGAGUAACCUAAGACACACUCUCCCCUCCUCUAAGACAGGAGCGUGUGAUCCUUGGUUAAAUACGGUCCAGAAGUAGCGGGUACUCCCACCGGCA
rno-novel-mir-689	chr10:-:87214104:87214211	AAUUUUAGCAGAGCCAUUGUAAUGGCACCUAGGCUUUGAGGUAGCCUUCUGUAAAUAGUCAGAGAUUGUUAUCUGAGGUUUAUGGAGAUGCUCUUCCUAGGGAGUCAC
rno-novel-mir-690	chr10:-:88027979:88028086	ACCCCAGUGCUCAUGGAACAAAAGAGUCAACCAGGGUACAUUCCUGUGAUAUCCAGGAGUGUCAGCACUAGGUCAGUUUCCCAGGUGGGCAUUGGCGGAUUGGCAGAA
rno-novel-mir-691	chr10:-:88227059:88227171	AGGUUUCGAGCGCGCCUGCGCCUAUCGCACGUUCUACCAUCUUGACCCAAUCGGGGUGCUGGUACUAGCUGUAAGAUGGGUCUAGGGUGAGGCUCGAUUUACUUUCUUUAAGG
rno-novel-mir-692	chr10:-:88227733:88227840	GCCACCCGAGACGCCGGGCCCGCCCAAGGGCUCACCUCCCACCCGUUUCUUCCGGGCACUCUUGGAGGUCGACCCUGGGCACAGGUCUCGGUCCCACGGGCACCACCG
rno-novel-mir-693	chr10:-:88432168:88432278	GGUUGGAGAGUUGGUGUCUGACACUGUUUUGACUUUUCUCCUAGUGGUGACCAAAGAUGGUGUCUACAUCCUUGACCUGGCGGCCAAGGUGGACGCCACUGCUGACUACAU
rno-novel-mir-694	chr10:-:88432218:88432328	CGUGGUUAUUCGGUGUGUGUGAGAGGGCACCUGGCGGAGUCUGGAGGGGUGGUUGGAGAGUUGGUGUCUGACACUGUUUUGACUUUUCUCCUAGUGGUGACCAAAGAUGGU
rno-novel-mir-695	chr10:-:88442699:88442809	CGGGGAGUUGGGGUAAGCUGGUGCUUACGGACAGAGAGCCACACUCGGGCUUUCUCGAAGAGGUGAGUACUGCAAUCGUAGGCGCGGGUGCGACCCCCUAGUCCCCACUAA
rno-novel-mir-696	chr10:-:88442701:88442813	GAUCCGGGGAGUUGGGGUAAGCUGGUGCUUACGGACAGAGAGCCACACUCGGGCUUUCUCGAAGAGGUGAGUACUGCAAUCGUAGGCGCGGGUGCGACCCCCUAGUCCCCACU
rno-novel-mir-697	chr10:-:88659620:88659727	CCUGCAGACCUCGCUGGUACAUCUGCUGAAAACCGUGCGGCUCCUGCGGUUGCUGAGGCUGCUGCAGAAGCUAGAGCGGUACUCUCAGUGCAGCGCGGUGGUGCUCAC
rno-novel-mir-698	chr10:-:88659625:88659735	GCUGCCCUCCUGCAGACCUCGCUGGUACAUCUGCUGAAAACCGUGCGGCUCCUGCGGUUGCUGAGGCUGCUGCAGAAGCUAGAGCGGUACUCUCAGUGCAGCGCGGUGGUG
rno-novel-mir-699	chr10:-:88992151:88992258	CUCCAGUUUGCUAGGAGGCGGCGGCAAAGCCAGGACUGCGGACAGUCUGAUGACUUUGUUGUGCUUGCUCUGGGUCAGGGUUCCCAGCGAAGCUACUGGAUAUCUCUA
rno-novel-mir-700	chr10:-:88992193:88992300	AUUGCAAAGCUCAUUUCGCGUAUUCCUGGUGUUCUUUGCUUCCUCCAGUUUGCUAGGAGGCGGCGGCAAAGCCAGGACUGCGGACAGUCUGAUGACUUUGUUGUGCUU
rno-novel-mir-701	chr10:-:88992201:88992308	CAGAGCGGAUUGCAAAGCUCAUUUCGCGUAUUCCUGGUGUUCUUUGCUUCCUCCAGUUUGCUAGGAGGCGGCGGCAAAGCCAGGACUGCGGACAGUCUGAUGACUUUG
rno-novel-mir-702	chr10:-:89005034:89005145	CCCGCAGGACCCGGGAGGCGAGUGGGAGAGUGGGUCGGAGGUGACUCCAUCUCCCACCUUGUCUCCCGCAGCCCCCGGGAUCGUCCUAAGGUACCUGCAGGAACAAAACCGG
rno-novel-mir-703	chr10:-:89005055:89005167	GCGGCUGGAGGUAACGGCAGCGCCCGCAGGACCCGGGAGGCGAGUGGGAGAGUGGGUCGGAGGUGACUCCAUCUCCCACCUUGUCUCCCGCAGCCCCCGGGAUCGUCCUAAGG
rno-novel-mir-704	chr10:-:89005055:89005168	UGCGGCUGGAGGUAACGGCAGCGCCCGCAGGACCCGGGAGGCGAGUGGGAGAGUGGGUCGGAGGUGACUCCAUCUCCCACCUUGUCUCCCGCAGCCCCCGGGAUCGUCCUAAGG
rno-novel-mir-705	chr10:-:89005056:89005166	CGGCUGGAGGUAACGGCAGCGCCCGCAGGACCCGGGAGGCGAGUGGGAGAGUGGGUCGGAGGUGACUCCAUCUCCCACCUUGUCUCCCGCAGCCCCCGGGAUCGUCCUAAG
rno-novel-mir-706	chr10:-:89030476:89030584	UUGUGGCUGCUGGAGGGGAGAUGGAGGAGGCUGAAGGGGUGGCCGCGGCCCCGGGUCCAUCUUCGGGGUUGGCUUUCAGGGGCCGCCGAGCUAUGUCCGGCUCCUGGGA
rno-novel-mir-707	chr10:-:89087111:89087218	ACUGAGACCCACAGUGUCUCUUGGGACAACUAGGGCUACAAUUCCAGAGAAGGGGGAGGGCUAAAGAAAUGAUCCCAGGGAGGGAAACAGAAAGGGGAGGUAAGUAGG
rno-novel-mir-708	chr10:-:89104089:89104201	UAAUGACGGGUUUCACCCCUCCUCUCCACUUGUGCCCCACGUCAUGGAAAAUGAUAACGUGAGGUGCUGUGGACUGGUGGGGAACUGGCGUACAUGCGGCUUUGCUGCCAGUG
rno-novel-mir-709	chr10:-:89104090:89104202	UUAAUGACGGGUUUCACCCCUCCUCUCCACUUGUGCCCCACGUCAUGGAAAAUGAUAACGUGAGGUGCUGUGGACUGGUGGGGAACUGGCGUACAUGCGGCUUUGCUGCCAGU
rno-novel-mir-710	chr10:-:89125980:89126094	CUGCCAGGAUCUGGUCCUCUCUCCUCUAAUCCUGUCACUCAUCAUCUGCCCACUGAGAGCAGUGCUCCUGAUUAGACUAAGACAGGGUCUGCAGGAGGGAGUCAUCUCUCAGAGU
rno-novel-mir-711	chr10:-:89139763:89139874	GCUGGGCGGUGGGGCCGGGCCUCGGCAUGGCGUGACAUCGGAAACUCAGGGCUCGAGAGGCGAAGAGAUGAGGAAACUGAUGAGGGGAAGCUGAGGUCCAUACCAUUGCCUC
rno-novel-mir-712	chr10:-:89225154:89225261	CAAGGCGUCACUUCUGGGCCCGGGCGGAAGUCUUCAGCUAGCCGACCGGGAAGUAGCUGAAGACCGGGCGAUGGGAACUCUGGAGGUCUCGCUCUGGGGCGGACCCGA
rno-novel-mir-713	chr10:-:89367590:89367700	UCCUACCGCAAGGGCAGGAAUCAGACCGACUCCCUGGCUCACCGCUCUGGGAGGGGUACUGGGUACCCCACCCUUCACUGAGGUCUCUGGAUUUGUCUCAGUGCCUUAGCA
rno-novel-mir-714	chr10:-:89368521:89368629	UUCCACCUGGGCUACCUGGACGGUGAGGUGGAGCUCGUCAGUAGAGUGGUUACCCACCUCCUGGCUCUGUACAAUCAGGGCCACAUCAAACCCCGAAUCGACUCAGUCU
rno-novel-mir-715	chr10:-:89557810:89557922	CGCCACCCUCUUUCAUCUAGUGGCCUCGCGUCUCUCCUGAGAUGAGAUCCAGGAAGGAGGCGAGGCCCCGGGGAAGAGGCGGACCGAGCCUUGGGAGAUGGGCCCUCUGGAAU
rno-novel-mir-716	chr10:-:89557811:89557924	ACCGCCACCCUCUUUCAUCUAGUGGCCUCGCGUCUCUCCUGAGAUGAGAUCCAGGAAGGAGGCGAGGCCCCGGGGAAGAGGCGGACCGAGCCUUGGGAGAUGGGCCCUCUGGAA
rno-novel-mir-717	chr10:-:89557813:89557924	ACCGCCACCCUCUUUCAUCUAGUGGCCUCGCGUCUCUCCUGAGAUGAGAUCCAGGAAGGAGGCGAGGCCCCGGGGAAGAGGCGGACCGAGCCUUGGGAGAUGGGCCCUCUGG
rno-novel-mir-718	chr10:-:89580624:89580731	UCCAAAAGGAGAAAGUUGGAUUGGGCUGAACACCAGGGAAGCGCUGAUGGGGCCCAGAAAGACUCUUCACUGUGGUCAUGGGUACAGAGAGACCUAGGAGCAGGUGGU
rno-novel-mir-719	chr10:-:89589560:89589667	UAUUCAAGAGCUUUCCAGGAAGGAGAGCAGGCAGAUCUUUCGGGUUUUUUCAGUUCUCUUUGCCAAGAGGCCUCCCUGUAAUCUCUCCUGGACAGCUAUGGUCUGAGC
rno-novel-mir-720	chr10:-:89905596:89905703	ACACGUGGCCUUGAACUCUCCGCUCUGAGGCUGGGCUCCCCUCCCCCUGCCUCAUCUGAGUGAUCACCCCAUAGGACAGCCACAGGACAGUCACCAACAUCUCCCUGA
rno-novel-mir-721	chr10:-:89909806:89909913	CUGGAAAUGGCAGAGCAUCAAUCCUGGCUCUGGAAGGACUCUGUUCUACAAAAGGAGGGUGGAUCUGUAUGCAGCCAGCAGGGUCACAGGUGCUUGGGGCCCCCGGGG
rno-novel-mir-722	chr10:-:90022792:90022903	CUUGCUGUUGGGUGACUUCCAUGGGGGUAGGGGUGGCAGGGUCUGGGCUGGAUUUUGGUCUUCUUAGCAUCUCACCGCCCCUCCCCCCAGCUAUGCAGCAAGUCUUGGACAA
rno-novel-mir-723	chr10:-:90022793:90022903	CUUGCUGUUGGGUGACUUCCAUGGGGGUAGGGGUGGCAGGGUCUGGGCUGGAUUUUGGUCUUCUUAGCAUCUCACCGCCCCUCCCCCCAGCUAUGCAGCAAGUCUUGGACA
rno-novel-mir-724	chr10:-:90022795:90022906	GUGCUUGCUGUUGGGUGACUUCCAUGGGGGUAGGGGUGGCAGGGUCUGGGCUGGAUUUUGGUCUUCUUAGCAUCUCACCGCCCCUCCCCCCAGCUAUGCAGCAAGUCUUGGA
rno-novel-mir-725	chr10:-:90036832:90036941	UCUCGUUGUCACGUGAGUGUAUUUUAUUCAUUUAGAAAUUGUGGUACACUCACACUGGGGAUCAGGCUGUGAACCUCGGUGUGAGCCUGCCAUCUUCCUCUAUCUGUUCC
rno-novel-mir-726	chr10:-:90163424:90163533	GUCCCAGCGGCAGUGGCCUGAGGGAGUCCUUGAGCAGCCGGCUGGCCCUGCUGACCACCUUUCCCUCACCGGCUUCCGCCUCGGGCGGCCCCUCCCUGGCAUGCUGCUGG
rno-novel-mir-727	chr10:-:90216681:90216789	AACCGAAACAGCUGACUGGCUGGCAGGGGAGGGUGCAGGGAUGACAGUGGGCCUCUGCCUCCAGGGCUGCAGGCUCCGUGGUGUCUCUGCAAUGCAAUGUGUGCGUCCC
rno-novel-mir-728	chr10:-:90235092:90235200	UCCAGCAGGGACCCAGAGGGAACAAACCCCUUCCUUCUGGGGAGUAUGCCCUCCCUACUGUGUAGUUGAACAGGGGCUAGGAACUCCCCACUCUCUCCCUCUAACAGCA
rno-novel-mir-729	chr10:-:90372091:90372198	CAUCCUGUCCAUUUCCAGCCUGAUGUCCAGAUGCCAGACCUAUGCUGGCGCUGGCUUGAGGCUGCACCAAUGCCAGAACAUCCUGUUUUGGAUGGAAGCGUAGGUGUC
rno-novel-mir-730	chr10:-:90992772:90992883	CGAUCCUGGGUGCAUGAUGGGGAACUUGGGUGCAGGGCAGGAUGUCUAGUGUCCCAAGAGCCCACGGAGACCUCCUCUCCUCGUACCUGCAGAAACCAGCCUGGACACCAAA
rno-novel-mir-731	chr10:-:90998113:90998222	CGUUUGUGACAGUCCCCUCCCUCUGGAGGUUCGGAUAGGGAUCCAAGAGUCCUCAGGAAAACCUAAAGCCUGUACUGUGUUCCCUGUCCCAGGCUCCAAGAUGAAACCAA
rno-novel-mir-732	chr10:-:91500496:91500603	CUGAGGCGUUUCGCUUUGCCUGGAGCUCCGCCACCUGCUCCUGCUCCCUUUGGUGAGUCUAGGGUCUGGACGUGGAGGGGAGCGCGGGGCAGCGACGCGAUCCGGCGG
rno-novel-mir-733	chr10:-:91500546:91500653	GCGCCGCUUCCUGUUGUCAGUGCCUCUGGAGCCGCGGCUUUUUCUCCGAACUGAGGCGUUUCGCUUUGCCUGGAGCUCCGCCACCUGCUCCUGCUCCCUUUGGUGAGU
rno-novel-mir-734	chr10:-:91676565:91676679	ACUAAAAUCUCUGGAUCAGGAAGUCGCCAUGUCUUCUCAACCUCAUAGUGGGGUUCCCCACCCUCCAAAGACACCAGGCAAGAUUUACCUUCAUUCUAUAGAACCUCCACCAGGA
rno-novel-mir-735	chr10:-:91677168:91677282	ACUAAAAUCUCUGGAUCAGGAAGUCGCCAUGUCUUCUCAACCUCAUAGUGGGGUUCCCCACCCUCCAAAGACACCAGGCAAGAUUUACCUUCAUUCUAUAGAACCUCCACCAGGA
rno-novel-mir-736	chr10:-:92008033:92008141	CGCGAGGGCGGGCUGCAGGCGGGCACGCGCGCGGCGGGGGCGGGCUCAGCAGAGUGCGGAGCUGCAGCCUGGGAGCAGGACGUGUCCGCGAAGAUGGCGGGCCGGGUGA
rno-novel-mir-737	chr10:-:92324877:92324984	GAAUUCCAUAGUUGGUCUCCCUGGUCCUGUCUCCUUCCCUGGAGGAUUGGGCUGAAAUCUAACAAUCUGGAGACACGGGCAGGAACCACAGACUCUGUCUUUCACCUG
rno-novel-mir-738	chr10:-:92518603:92518713	UUGGUUGAGCCGUGCAGGUAGGUCUGGGGCCGGGGGAGCUGCCGUUGGCACUGCUGCCCCGGGGGGUGGGGGCGCGGGUGAGCGUUGUAUGAGGGGGGAUGUUAGUAAUGG
rno-novel-mir-739	chr10:-:93722223:93722330	AUGACCCAGACAAACAAGCCUCAGGGGACCCAGAAGGUUCCAGAAUCUCCUCACCCUCAGGAGGGACACAGCUGGCCUUGUAGGUACAAUGCACCAAAGGAGGUCAUU
rno-novel-mir-740	chr10:-:94351969:94352076	AGGGGUAAAGGGGAUAGGAGCAGCUUGUUUGCUUAGCACCUUCGGCCACCUGGAGUGUCCCUGGGAUCUGGGUUGGGCCACCGGAGAGCUGACCCCUCUGACUACUCC
rno-novel-mir-741	chr10:-:94407058:94407167	CAUCAGAUCAGAGUGACGUCAACCUGACGGAACUCUACCGGAGAAACCCAGCCUCCGCUAAAGCACUUCCAGCUCAGGGGACGGAGCGGGUUCCGUAAUUUUCCCAGCAG
rno-novel-mir-742	chr10:-:94439473:94439583	GUUUCUUUCUUUUAUAGUCUCUACAAGAAGGCUGGACUUGGCAAGGAGAAACGCCAGGUCACCUAUGUUGUAGCCAAGAAAGGUGUAGGCCGUAAGGUCCGGCGGCCAGCU
rno-novel-mir-743	chr10:-:94460710:94460822	CAGAGGGGCUGCGGAUCCUAAAGCUGGGCUGGGAAGAACUUGCGAACUUGGAAUAGAAGAUCCCGGAACCCGGUAAUAAAAUCGGAAAGUCCCGGAUCGCGGAACAGAGCUCG
rno-novel-mir-744	chr10:-:94698391:94698501	CACAAUGACUGAUUGUCCCUCCCGGGUAAUGAUGGGGCAGGGCCAGAAAGCUGGAGCUUGUUGUUCUUUUCUGGUUUUCCUGUGUGCUGUAGGAUGAUGGGAGGGUCUUGU
rno-novel-mir-745	chr10:-:94804250:94804362	UCCGUAUGACAGGUCAGGCUUGACUCCGGCUGAUGAACUGUUCUGCUGUGUUGGUGAACAGUCAGCAUCUGGGGUCCGGCCUCCUCCUGGUGGAAAUGUGGGGGCCCCCUUAG
rno-novel-mir-746	chr10:-:94978740:94978851	CCAGGGCCUGCCGCAGGGCCUGCAGGUGCUGGCUGUCCGGAUAUGCGGGUCCCACAGAUGGGACGCAGCAGCCUACGGACCCCGAGCAUGCAUUGGCCCGCGAGGCGCUGGU
rno-novel-mir-747	chr10:-:9508830:9508940	AAGAGAUGUGGGCUGGCCCAGUUGAUAGUGCUGACUAGGUCAGUUUCUGUCCAGUUAAUAGUGCUAACUCUGUCAGUUUCUUUCACCUCUCCCAGUUUCUAAUGAUUGUGU
rno-novel-mir-748	chr10:-:95697122:95697233	CCUCCCUGCCCCAGGCACACUGCAGCUCGGCGCGGACUCUCCAGUCGCGGCGAGCUGGCUGCAAACUCACGGGCACGCACGGAGCUCGCAGAGCCGAGGGACUCGGGGGAGG
rno-novel-mir-749	chr10:-:95697124:95697235	CACCUCCCUGCCCCAGGCACACUGCAGCUCGGCGCGGACUCUCCAGUCGCGGCGAGCUGGCUGCAAACUCACGGGCACGCACGGAGCUCGCAGAGCCGAGGGACUCGGGGGA
rno-novel-mir-750	chr10:-:96015924:96016031	UCCCCGGGGUCCUUCCAGGGAACCAAUCUUGCUUUCCCUCAGCUUCCUUCGCUCUAAUAAUGUGAAUGAAGCCUGGGAGAGAAAAGAGAGCGCGCGUGAGCGCAGGGA
rno-novel-mir-751	chr10:-:96476656:96476765	UCCCCGGGAGGGGCUGUGUCUUCUCCGGAGGCCACACUACAGCAGUAUGCAUUCCCAGUAGUGUGAGUGCCGGAGAACAGCCCAGAGUGCCCUCUGGGCCCUGGAGCAUC
rno-novel-mir-752	chr10:-:9777442:9777554	GAUUCCUCACAAGGAGUAUAGCACACCAUGGAUGUGCUAGGAUGGACAGCACUUCCGCAACCAGAAUAGGUACGUGAGGUCACACCAUAGCACAUCAUCACUCUGAGUGUAGG
rno-novel-mir-753	chr10:-:98479848:98479959	CAGGCUGGGAGACAGCAGAUAAAAUGACCUCAUCUGUACGGGAGGGGCAGUCCCCAGAACAGUGCCUGCCUCCUGGGUGUGCUUGAGAUCCUGUGUAGCUCUGCUUGUGUCU
rno-novel-mir-754	chr10:-:98644740:98644847	GGGUGAGGAGAAGCCAAGGCCCGCGGCGCUCGAGGCCGCUCGCCAUUCGCUUCAGCGGAGAGAGGUGACGCGGCGGCGGGGACGCGGGGACCCGGGGGACGGCGGGGA
rno-novel-mir-755	chr10:-:99360115:99360225	GAAUCCUCUCCUGCUGACAUCUGAGGGCUGGUACAACUUCAUCCAAAUCUGAUCUUUUUAUGUGUGGGCUCUCUCACUGUCACAGUAGAGUUUUCUGUGAAAACACACACC
rno-novel-mir-756	chr11:+:11586051:11586160	GGGAAGGCGAGGAAGCAGGAGAGGAGGGGAGGAAAGAGCUGCUCCCAGUAUAUCCCCGGGAGGGGUUGGAGGAUGGGGGCGGCCGGAUCUCCACCUCCACCCGAUCACCC
rno-novel-mir-757	chr11:+:15487382:15487489	UCGUUCCAGGAGAUGUGGCGUUUGGAGGCUCUGCUGGCCUGGAGGGGUCUGGAGGGCCCUGGCUGAGCAGGGUCCUUUGUUUAGUGGGAUGACUGGAGCACGGCACUC
rno-novel-mir-758	chr11:+:15494619:15494726	UCGUUCCAGGAGAUGUGGCGUUUGGAGGCUCUGCUGGCCUGGAGGGGUCUGGAGGGCCCUGGCUGAGCAGGGUCCUUUGUUUAGUGGGAUGACUGGAGCACGGCACUC
rno-novel-mir-759	chr11:+:20221991:20222100	GCCGCCGCCGCCGCCUGGAUAUAGUGCGGCAAGGCGCGGAGCUUGCAGUCACUUUGCGAGGAGGAGCGCGCGGGCUGCGGGCGGCUGGGGCACCCGGGAGCGGCGGCGGG
rno-novel-mir-760	chr11:+:20221991:20222101	GCCGCCGCCGCCGCCUGGAUAUAGUGCGGCAAGGCGCGGAGCUUGCAGUCACUUUGCGAGGAGGAGCGCGCGGGCUGCGGGCGGCUGGGGCACCCGGGAGCGGCGGCGGGC
rno-novel-mir-761	chr11:+:2357340:2357452	GAUUAAAGAUGUCUACCGGGUUGGGGAUUUAGCUCAGUGGUACAGCGCUUGCCUAGCAAGCGCAAGACCCUGGGUUCGGUCCCCAGCUCCACUGCUUUUCACGUAAUUCUCUC
rno-novel-mir-762	chr11:+:25227156:25227268	UUGGGAGCUGGGAAGGAGACUUCCUUUCUUCAAUGGGCUUUUUGAGAAGGGUUACUCCGCACUUUCCUUGACCCUUCUUGCAAAGCCUGUUGAAGUUGAAAUAUGCUCUUCCU
rno-novel-mir-763	chr11:+:25898383:25898494	AGAAUCCUGCCCCUGACUGCUCUUAGUUUCUUGUGCCCAGAGGGCUCCCAGGGCACUAGGUGGGUUCCUCUUGGGCCAGGAAUAUGAGCAGUGGUUUUCUCCUCUGAACUCU
rno-novel-mir-764	chr11:+:25898384:25898494	GAAUCCUGCCCCUGACUGCUCUUAGUUUCUUGUGCCCAGAGGGCUCCCAGGGCACUAGGUGGGUUCCUCUUGGGCCAGGAAUAUGAGCAGUGGUUUUCUCCUCUGAACUCU
rno-novel-mir-765	chr11:+:27141975:27142084	GAACGAUUAGGCCGAUCUCGGUUCGCAGGCCUGAUUCGUGUCCCUUGUCCUAAGUUAAUUAGCAAACUCUGGUUGGAAGGUUUGGCUUGUGACAUUUCUGAGGUGGGCAC
rno-novel-mir-766	chr11:+:28056883:28056997	CAGCGCCUACGGAAGCUGCACGCUGUGGUGGAGACUCUAGUCAACCAUAGGAAAGAACUAGCACUGAAUACAGCCCUGUUUGCCAAGAGUCUAGCCAUGCUUGGCAGCUCCGAGG
rno-novel-mir-767	chr11:+:30893586:30893696	UGGUGUAUUGCUAGCCACAUCCCUGAUUCUAGUCUGUCUGCUCCCGGAGACCCACUUUCCUAGAUCCAGAAAAAUCAGGGAUCGAUGGCGAGCCAAAGACACCCCCUGCCU
rno-novel-mir-768	chr11:+:30895768:30895879	ACAACUCAAAGCCUUGUUUUCUUCCUGGGGAUUGAACUCGGGCUGCUGAUGAGUGCCUUUACCCUCUAAGCCACCACAUCAGCCUGAGCUAUAGAUUCUCAGGACCGCACUG
rno-novel-mir-769	chr11:+:31813536:31813647	GAGCUGCAGGAGUCGUCGGUGGCCUCAGCCCUGGAGUUGCCGGGGCCACCUGCGACCUCCAUGCUGGAGUUGCAGGGGCCCCCUGUGACUCCAGUGCCGGAGUUGCCUGGGC
rno-novel-mir-770	chr11:+:31814960:31815069	GAUGUUAGCAACCAGUUCCAUGGAUUCCCAGAUGUUAGCAACCAGUUCCAUGGAUUCCCAGAUGUUAGCAUCUGGUGCUAUGGAUUCUCAAAUGUUAGCUUCUGGCACUA
rno-novel-mir-771	chr11:+:31816261:31816373	UGACUUACAUGGUUUCUGAGACUACCAUGGCAGCUGAACCAUCUGUGUUAACAUCAGAGGCUUCUGUUAUGGCAGAGACAUCAGAAACAUAUGAUUCCAUGAGACCAUCAGGG
rno-novel-mir-772	chr11:+:32020032:32020143	CCUCUCAUCUCCUAAGCACUGAGAGGUAACAGCUGACAGAGGAGUGGUGGCACCACCGAGUAGACAUGAGUGGUCACGCACUCACUGUCAUUUAAAUGCCAAACUGAGUGCA
rno-novel-mir-773	chr11:+:32070020:32070131	CCAGCUAUUGUCAGAGCAUCUUGGGCUUGGAGACCCUGGGAUGUUUCAUGAGAAGUUCUGUCUGGUGACCAGUCCUGCCUGAGCCCAUUCUGUGCUUGAAAGACUGUUGUGA
rno-novel-mir-774	chr11:+:32073985:32074096	GCAUUCAGAAGAGAGCUUAUUCUGUCAGCCUUCAAAUUUCCCAACAUCCCUCCGGGAUUUCUGGAGAGCUGGCCAGUGACCAGGGCUCCUUUUUCUGCUGUGGAAAUUCCUC
rno-novel-mir-775	chr11:+:32308241:32308348	GAGGGAGCAGGGGUCUGGGGUCCGGACAGAGGGAGGAGGGUUGGGCCUUGAACAAUGGGGAGGGUCGUCUAUCCCCAUCCCCACACCCAAGUCUGGCUGCAGAGCCCG
rno-novel-mir-776	chr11:+:32378368:32378479	UCUGGUUGCUGGUGCCUUAAGCCCAUCUCCAUUGAGGCCUGCCUGUGGCCUCUUCUGUCUUAUGAGAUCACAAGUGCCCGGGGCAGGCCUGGAAGGAGUGGGGUCUCCCCCA
rno-novel-mir-777	chr11:+:32378368:32378482	UCUGGUUGCUGGUGCCUUAAGCCCAUCUCCAUUGAGGCCUGCCUGUGGCCUCUUCUGUCUUAUGAGAUCACAAGUGCCCGGGGCAGGCCUGGAAGGAGUGGGGUCUCCCCCACUC
rno-novel-mir-778	chr11:+:32378369:32378481	CUGGUUGCUGGUGCCUUAAGCCCAUCUCCAUUGAGGCCUGCCUGUGGCCUCUUCUGUCUUAUGAGAUCACAAGUGCCCGGGGCAGGCCUGGAAGGAGUGGGGUCUCCCCCACU
rno-novel-mir-779	chr11:+:32451005:32451113	AAGGUGGGUCUAGCUAGAUUUCUUGAAAACCAAGGCCUGUGCUGAGCGGGCUAAGUGAGGUCCAGGCAUCAGGGGAGAGCUGAACCUACCGAUGCUUUAAAUGGUUGGC
rno-novel-mir-780	chr11:+:32553906:32554015	CCUGUCUCCAUCACUGCCCACAGCUGGUUUCCAGGUCUGAGGUGCAAGCAGGCAGAGCCUGGUCCUCAGGUCCUUCCUGCUGCAUCCUCUGCUGACUGCUUUGAAGUACA
rno-novel-mir-781	chr11:+:32951096:32951208	UUCCACCGCCUCCUGCCAUUCCAGGUCCACUCUGCUGAGCACUGUGACAUCACCCACUGCUUUCGGAGUGUUCCUGUGCCUGGCUUGGGGACCUCUCCUCUCUUCCCUGGCUA
rno-novel-mir-782	chr11:+:34598300:34598407	GCGCGCCUCCAAGCCACGUGACCCGCCCGCCUCAGGAGCGGCUCAGCGCUCGCUCUGCGGGUCUGGUUGACGUGGAGGGCCGGAGGCGUCGGCAGCCCGCGUCCGAGG
rno-novel-mir-783	chr11:+:34792633:34792740	CACCACGGCGGCUGCGCGAGCAGGAAGGCAGGAUUCGGAACUGAAACGAACCUGCGUAUCUCUAUCUCCAGCAGCCUGUCGCUGUGGCCACUGAACUUUAGGGGCGAU
rno-novel-mir-784	chr11:+:34962610:34962720	AUAUUUUUUGAGACAGCGUCUUUCUCUGAACGUGGGGCUGGCUUUUGCAGUUAGACUAGCUGGCCAGCCAGCUCAGGGAUCCAGCUGUCUGUACCCUUCCCCCCUCCCCAC
rno-novel-mir-785	chr11:+:3512756:3512867	AGUUACCUGCUUUACACCAAAAGUAGUCUUUAGGGUGUAGUUAGCUAUUUCUUUUGUGACAUUUUAGGGUGGAGAGGGUGGGCAUGAUAGAGCCAGUCAUUCAGGACUUAAU
rno-novel-mir-786	chr11:+:36075657:36075766	CUCCCUCCGUCACCCCUGCUGUCCCCUCCCCCGGUCCCCUCCGGCCCUCCCCCAGCUCCAGAAGAGCGCGCGGCCAGGGGAUCGGGCUGGUUACUUCCUCCACCGCGGUG
rno-novel-mir-787	chr11:+:36430839:36430947	CGGGGCGGAGCCUAAGGGGACGGUCACCUGGGCUCGCCCUGAAGACCCCGGGGCUGGGGAGGAGUUCGGAUGGCGGCGCCUAGAGUGGAGCAGCAGAGGCUACGUCACC
rno-novel-mir-788	chr11:+:36546275:36546382	GUUGAUCAAGAGCCCCAAGGCUGAGCUGUGGGCGAGAAAACUAGUAAGGCGGUUCAGACGGAUGCAAAACGCUCCAUGGGGCGGCACGGUGAGGUGCCAGGGGUGGAA
rno-novel-mir-789	chr11:+:39531858:39531965	GCAUGGCGGCGGCGGCGCGCGCCUGAGAGCUGGGGGUACGCCGGCCCGGUCAGGCCUCGGCGCGGCCUACACGCUCCGCUCCCUCGGUCGCUCGCUCGCUCCCGCCCG
rno-novel-mir-790	chr11:+:39532088:39532199	CUCCCCGCAGAGCUGUACUUCCUCAUCGCCCGCUACCUCUCAGCUGGCCCGUGUCGCCGAGCGGCGCAGGUGAGUGCGGGCCAGCUGGGUGGCGGGCGAGCGGGCGAGUGAA
rno-novel-mir-791	chr11:+:42475929:42476039	AACCCAUGCUUACACUAGUUUUCCUGGGGACCGUCUCUAGGAAAGGGUAGGGUCACACUGCCUCAUUUCCUUUCUCCUGUUUUCUGUCCCUAGGAGCAUGAACAGCUCACC
rno-novel-mir-792	chr11:+:45316015:45316125	AAAAACAGGACCAGGAUUCUAAAGUUUACUGAGCCCUGAGGGCUGCUCCUUGGGUGGGAGAGCUGGGUCCUGGCUGCUCUAAACAGGAGCCAGUGUGUCACAGAGGCUCUG
rno-novel-mir-793	chr11:+:47269378:47269490	GGCAUUGCUGGAGUAUGAGGCUUGUCCCCGAAGGUUCUUCCUUCUGUAUUGUGUGUGCUGUCGUGGAGAGUACACAUGGUACAGAAGGAAGAACCUUCCUCAGUCGGCUGUGG
rno-novel-mir-794	chr11:+:51202365:51202477	CUUGGCUCAGGCCCGCAGUGGCGACAGCAGCUGGACGCCAGGGCUGUCCCCUCUCCCUGAUGGCCCGCGCCCAGCUGCAGGGCCCCCGGGCCAGCAAGCGGCGCCCAACCCUG
rno-novel-mir-795	chr11:+:53052030:53052137	GUCACAGGUCAGAGUAGAGGUGGAUUGGUAGAGCUGGGGCUGGUGGGAGUGGGAAACUUACAUCAUUUCCCUGCAACUGGAGGCCCUACUUUUCCCUGUGUAAUAAUU
rno-novel-mir-796	chr11:+:53224542:53224653	AUCCUUCUCUGAACGGUCCUCCUGUGAUGGAUUUCUCUUCUGCCUCAGAUGACAAACCAAAGGAGCAGCUGCAGAGGCGUCUCCCCAAAGUCCCCGAGACAUUCUGCGGUGA
rno-novel-mir-797	chr11:+:53575250:53575357	ACGCGCACUCCGCCCCGCCUGGCCGCCUCUGCUCGUUGACGUGAAGCCAGCCUCACACCCAGCUCUGGGCAGGCUCUGGCGGGGAGCGCCAAGCACUAGCCUGUUCCC
rno-novel-mir-798	chr11:+:53575300:53575407	CCUCACACCCAGCUCUGGGCAGGCUCUGGCGGGGAGCGCCAAGCACUAGCCUGUUCCCGGGCUGUGCGAGCUGCACUCUCUGCUCACGGCCGGUCUCUCCAGCUCUCU
rno-novel-mir-799	chr11:+:57993988:57994095	GGCCGGGGCCGCCGGGGCACACCGAGGCGCUCUGAGGCGGAGGGCUGCGGGACUCCCAGUCCUGCCUUUCUCUCCUCCUGAGUGUGGCGGUUCCCCAGCGGGACGGGG
rno-novel-mir-800	chr11:+:58082019:58082126	GCAGGGAGGAGGGGUGUCGCGGUCACGGGCAGUGGCCGUCCAAGCGAGCAGGAUCCUGGUGGUGGGAGGGACCGCUGGGCGGGAGGCGACCUGCGGCCCAGGGAGACA
rno-novel-mir-801	chr11:+:58661247:58661355	AUAACUGGGCAAAGGCUCUCCUAAGGCAGGCAGACUUCAGUGUUGCCCAUUUCUCAGUUCUCUGAAGCUUGCUUACCUCCAAAGGGCCUUUGCCAUAGCCCUGUACCUU
rno-novel-mir-802	chr11:+:58661247:58661357	AUAACUGGGCAAAGGCUCUCCUAAGGCAGGCAGACUUCAGUGUUGCCCAUUUCUCAGUUCUCUGAAGCUUGCUUACCUCCAAAGGGCCUUUGCCAUAGCCCUGUACCUUGU
rno-novel-mir-803	chr11:+:60093962:60094070	CACUUGAAUGCUUUAGGCCAGAGAGAGCUUAAGUGAGAUGUGGUUAAUUGAUUUAUUUUUCAGAACAAUCCAAAUCUCUGGUGUGGCUCCUGGCCUAUAAUAUAUUCUC
rno-novel-mir-804	chr11:+:64600174:64600284	CAAAUAUAACUUCCCGGGAAGUGGUUACAACGCUGCACCUCUCUCUCGCCCCGAGGAUAUCCUAACCUCAGCGUGGGAGAGGAGACGUCUGGGCUUCAGGGACCGCAGACC
rno-novel-mir-805	chr11:+:64761578:64761685	GUGGUCUGCGGGUGAUGGAGCGGCUGUCGGGCUGUAGGCUUAGGCCAUGGAUGCUGUUAUUGCUCCUGUUCCCGGUGCAGGGCCGCCAGAAGGACUCAGGUGGGCUCC
rno-novel-mir-806	chr11:+:65210466:65210574	ACCUAGCUGCAGUGGGAUUGGCCUCGGGUGGUCCCUAGAGCGGGCGGACCGGCUGAGUGGUCGGCCUGCGUCUGCUCUCCGACCCGACGCUCGUGCUGGCUGUGCAGCC
rno-novel-mir-807	chr11:+:67864572:67864685	UCACUAACAGCGCCGUGUCCUGUGGGUUGGACAGUUCCAGCCAGGGUUAUGUACAGACUGGGUUCUGGGAUGUGGCUCUGGGUCUGUGUGAACUGAGCCCCCCAAGGAGAGGCA
rno-novel-mir-808	chr11:+:68136196:68136309	UCACUAACAGCGCCGUGUCCUGUGGGUUGGACAGUUCCAGCCAGGGUUAUGUACAGACUGGGUUCUGGGAUGUGGCUCUGGGUCUGUGUGAACUGAGCCCCCCAAGGAGAGGCA
rno-novel-mir-809	chr11:+:69746053:69746165	GUUUAGAGCACACACUGGCCUCUGGGAGCUGAGGACAGAGACUCCUGGUCAAGGAGCUGACUCUUCUCCAGCUCUUGUUGCCCUUGCCCCGUGCUGGCCUCUCUCUCCAGCCC
rno-novel-mir-810	chr11:+:70618742:70618849	AGCGGUCCGGACCCCGGGAAGUGGAAGAGGCUGGAACGUAGAUGAAGGGUUUAGCCAGGAUUUCUUGGAUCUUUCCUUUAUUCUCUUACCUAGCCUCUCCUCUUUUUC
rno-novel-mir-811	chr11:+:70726876:70726985	AACAACUGUUCUUAACUGCUAAGCCAACUCUCCAGAUCUGAAAGACAAUAAUAAAUAUUAAAAAAAAAAACAAAAAACAAAAAAUCAGGGCUGGAGAGUUGGCUCAGUGG
rno-novel-mir-812	chr11:+:70726876:70726986	AACAACUGUUCUUAACUGCUAAGCCAACUCUCCAGAUCUGAAAGACAAUAAUAAAUAUUAAAAAAAAAAACAAAAAACAAAAAAUCAGGGCUGGAGAGUUGGCUCAGUGGC
rno-novel-mir-813	chr11:+:71150935:71151042	UGGAGCCGGAAGUGGGGGUGGCAGGGGUAGAACGGCAGCUGAGGCAGCAAUCCUUGACUCUGUCGCUGUCAGGGUGUAGUGCAUGGUUCUGAGCCCACCAGCCAGGUG
rno-novel-mir-814	chr11:+:71796071:71796178	GCCCGCGCCAUCUGCCCUCAGUGAGGCGGGGCGCGCAGCGGACGCCCCCGGGCAGGGGCGGGAGCGGUGGAGGCGCGAGCGGCUGUCGCUGAAAGGGGCGGUGAGCGA
rno-novel-mir-815	chr11:+:71796121:71796228	GGCAGGGGCGGGAGCGGUGGAGGCGCGAGCGGCUGUCGCUGAAAGGGGCGGUGAGCGAGCUGCUCCGGUCUCUAGCGAGGCUUGGCCUCCCGCGCCGAGACGGGGCGC
rno-novel-mir-816	chr11:+:72704164:72704271	UAUAGAUAAGCUGGGAGGGAAGGUCCUUAAGGAGCAUGCGGCCGCCCUAUCAACUCUGACCAUUAAAAGCAGAGGCUGGUCUGAGGCAGCCUCCCCUCCACGGCUCCG
rno-novel-mir-817	chr11:+:73079093:73079200	GCAGUCUUCGCGGCUGCUAUGCUCAGGGAGCGCAGCGCCCUCCGCAGCUCCGCGCAGCCCUAGAGGCAGCCGAGCGCCCGCCGACGCCGCCCGGAUCACCGGUGCCAC
rno-novel-mir-818	chr11:+:73296502:73296613	GUCAGCCAGUGACCUGUCUAUGGUUGAAUGUGUAACAUCUUAGCUUCCUUUGUCUACCUUCAACUGAGGCGGUCCUGGGGAGAGGCCCAUGGCCAGCUUCAGACCAGCCUUU
rno-novel-mir-819	chr11:+:73488023:73488134	GUGUGUGUAUGUGUGUAUGUAUGUAAGUGUGUAUGUAUAUGUAUGUAUAUAUAUAUGUGUGUAUGUAUGUGUGUGUGCCCAUAUGCACAUGUUGCACACACAUACACGUGUG
rno-novel-mir-820	chr11:+:73936367:73936480	UGGGCUCUGGGAUGAGGCAAUCACGUGACCUCACAUCCGGCGCGGGAGUCCUGAGCUCGCGGGGCGCUCCCCGUGUGCCCGCCGGCCCUCCCCGCAGCGUGACCGGGCGCCGAG
rno-novel-mir-821	chr11:+:75313488:75313599	AGGACUUGCCCUCCAAGCUUCAGAGGGAGGUCAGUGAAGGAACUCUGACUGGGUGGGGGAAGGGGACCAUUCCUUCAGCCCCAUCUGUCAUUUUGCGCUGAACCUGUCAAGA
rno-novel-mir-822	chr11:+:75625868:75625976	AGGGAGAUUUUGGGAUAGAGUUUAUGUUUUACCUGGCUCAUCUGAGACGAGGGUGAAGUGUAACCCAGUCUUGGAGAAGUCAAGACUGAGCUCAGAUGUCUAAAUUCUU
rno-novel-mir-823	chr11:+:75851222:75851329	ACUCAGUAAAUAUAAGCACUUUGGUUGAAAAGGAAGACCAGCAGUAGCAUGUGUAACAUGACACACAGAAUCGAACAUGCUCUCCUCUGGUUCUGAUUCAGCCUAGUG
rno-novel-mir-824	chr11:+:75904579:75904686	CCUCGUCUCCCGCUCUCUUUGCAGUGCUGCCGGAGGAGAGGCGCGCUCACCGCAGCUGGAAACAGCUGCCACCCCUCUCCAACCCCCCGCCCUGCUCCCCUACCCCGU
rno-novel-mir-825	chr11:+:76006973:76007081	CCAUCUGUUGCUAGGAGAAGUUGUAGCUUCUCAGCUGCUGCCAGCCAUGCAGUCAUUUCUUAGUGGAACUGAGGUUGACAGUAGCUAGAAAAGGAAUGUGUCCUUACCU
rno-novel-mir-826	chr11:+:78222025:78222132	GUGGAAAUUUGACCUGUGAAAACUGAGAUACAUCACCUGUCAUAUAGUGUAAGUGGUGACCAAUCUGCCAUUCUGUGCUGUGACUGUGAUAGUAUCAGUUCGGGUCUG
rno-novel-mir-827	chr11:+:82234133:82234244	UGUUUAGAUUGGGCUGGUGCUGUAUCCUGCACAGGCUGCUGGCCUACACAGGGAGAUGUGCACCCUGUCACAAGUCCCUGCUGUGUGCCUAGGAGCUUGAGCGGAUGAAGAA
rno-novel-mir-828	chr11:+:82945067:82945174	CCCAGAAAAGGAGCCCUGGGCUGCCCCAGACGUCAGAGGUGCAGGAUACCUUGAGAAAAUGGCUGAGUAUCUGAGGCUGCCCCACUCCCUGGCGAUGAUCCGCCUCUG
rno-novel-mir-829	chr11:+:83075796:83075904	UCCAACAGAACAACAAAAGCCUCAUUAAUCCCUUUGCUUGACUGAUCCUGUAGUCUCACUCCAUCCAGUCCUGGCUGCAGGAACUCAGGGAAGCCUGUGUGGUUCUUCA
rno-novel-mir-830	chr11:+:83964024:83964133	ACCCGCCCAGGAACUACGGCCCAGGCCAACUGCUGAACCCCGCCGCGGCCCUCCAUCACAGCCACGGCUGCAGCCCCUGGCUUGGCAGCCGCGGCCCCCGCUUUCUCGGG
rno-novel-mir-831	chr11:+:84068565:84068672	UCCUUGUGCUCCUGGAUCAGGCUGCUGGACCUGGAAGUCUCACCCCGGUGGGCCCAGGGGAACGGUGGGCCGGCUCCCUGGCUGGAGGGGAGGGAUGGAAGAUAAGUG
rno-novel-mir-832	chr11:+:84068589:84068696	CUGGACCUGGAAGUCUCACCCCGGUGGGCCCAGGGGAACGGUGGGCCGGCUCCCUGGCUGGAGGGGAGGGAUGGAAGAUAAGUGUCACCUACUGCGGAAGAAAAUAGA
rno-novel-mir-833	chr11:+:86276789:86276898	GUGCGCGAGCUCUGCAACGUAGGCGCUCGCAGGUUAUUUCUGGGAUGAGCAUACCGCAUCUGUUGCGGAUGAAAAUCAGAACUGGGAAUGUACUCACUUGACAGGCUACU
rno-novel-mir-834	chr11:+:86509458:86509567	UGAUCACUGUGAGCCUACUGUCUGACUCUGCAGAGCUGUAUCACAGCUUCUGACCAGACAGAAGGGGCUGGGAACAGAAGCGUGGGGACAGCACCACACUCAGGGGCAGU
rno-novel-mir-835	chr11:+:86730591:86730701	CAGCGCAGGAAACCAAUUAAGCCAAGAACAGGGUGGGGUGAGGCAGGAAGGGCACAAGACACACAGCCUGUCUGCUCUGCCCCCGCCCUGCAGAUGCCGUUGGCUGCAGUC
rno-novel-mir-836	chr11:+:86842945:86843053	CAUACAGGUGAAGCAGAGACCUGAAGCCAGGACGGAGACAAGCUGUUGCUUUUGAGUGCUGCUUCAGCAAGCCUCACCUCACCAUCGCACAUGCCUAGCACCCUGCCUC
rno-novel-mir-837	chr11:+:86852787:86852894	GGUGAGGGUCGGCCGACUGUGGUCGGGCUGCGGGCGGCUCGGGCAGGUCGCGGGCGCCACAGGUAGGUGCGGGGCGCGAUGGGCGCCCCGCAGGCGGCGGGCGCUGCG
rno-novel-mir-838	chr11:+:86909170:86909282	UUGGAACUAGUGCAGGGAGCUCACACCGGGCAUGAUGGACACAGCCAGGGAGUAGCAAGGGCUAAGAUCUGCCUUGUGUGCCUGCCUGGUGGAGGUCUGAUGGACCUAGACGC
rno-novel-mir-839	chr11:+:87081374:87081482	AUUCAGGCGCGUCCCACCCCUCCAGGGAGACUUAGUAAACGCUCUUUGUCCUCGGAAAAAGAAGCUGGGGUUCGCUGGGCUCCCAGGUGGAGCUGACCUUGGAGGUACG
rno-novel-mir-840	chr11:+:87242463:87242571	UUGGUUAAUGCUGGUUGGAGGCGGGGUAGCGCGGGCUGGAGCAGGACGGCCGCCAUCUUGCGCGAGCCGGAAUCUCAUCCCGCUUCUGCGGCCUAGAGUGUGCGCGAGU
rno-novel-mir-841	chr11:+:87402598:87402712	GGGCGGGACCGGAAGAGAUCCUGGCGGGGCGGGCCACCGGAUGUUGGGAUUGAUGGCGGGGAUCGUCACUGCUGAUUUCACGUUCCUGGACUAGUCGUUUCGCCUCCUUGUGUGU
rno-novel-mir-842	chr11:+:87676769:87676878	UGUCCUUGUAUUUGCACAGCUGGGGACUUUCAGACCAUGAUAAAAGUAUUCUAUAUAUGUAUACCAUCCCUUGCUAGAAUACUUUUAUCAUGGUCUGAAAGUCCCCAGCU
rno-novel-mir-843	chr11:+:87676776:87676886	GUAUUUGCACAGCUGGGGACUUUCAGACCAUGAUAAAAGUAUUCUAUAUAUGUAUACCAUCCCUUGCUAGAAUACUUUUAUCAUGGUCUGAAAGUCCCCAGCUGUGUUGUC
rno-novel-mir-844	chr11:+:87676781:87676892	UGCACAGCUGGGGACUUUCAGACCAUGAUAAAAGUAUUCUAUAUAUGUAUACCAUCCCUUGCUAGAAUACUUUUAUCAUGGUCUGAAAGUCCCCAGCUGUGUUGUCAUUUGC
rno-novel-mir-845	chr11:+:87677873:87677984	GCGAUCCCCCUGUAGUCCACUUGCGCCUGCGCAGCAUCACACGUGACGGUGAGGCUCCGCCCCCACCUCCAGCCUCCCGCCUCCCGCCUGCUGCGAGAGCGGCCACAGCUUG
rno-novel-mir-846	chr11:+:87677923:87678034	GAGGCUCCGCCCCCACCUCCAGCCUCCCGCCUCCCGCCUGCUGCGAGAGCGGCCACAGCUUGCGGCAGCACCAGGUCAGCUGCGAGGCAUGAACCGUGUGGGCCUGGCAGGC
rno-novel-mir-847	chr11:+:87814749:87814857	GUCCGGGAACAGUGGGCAAAACCCCUGGGUCGAGGUGGGCGAAACAGAGCAGUAGCAGAGGCCGCCUCGGGCUUCUCAGCUGUCCGGAGUAGGAUCCAGCGACUUCUGU
rno-novel-mir-848	chr11:+:87858348:87858455	GCGCUGUGAUGGCGGCUGCUGGGGCCCGGGGAGGCGGCGGCGCCGGCGCCGCUGGGGCCCGGGGAGGCGGCGGCGCCGGCGCCGGCACCGGCGGCUCGGGGUCCAGCU
rno-novel-mir-849	chr11:+:87893916:87894026	AUAACAGACUAGGGAACCCCCAGGGCUGAAGUAUGAAGUAGAAGGACAGCUCCCGGGAUCCUCAGUAACUUGGAACUGUCCCUUCUGCUCUACACUUGCAGUCGGCAGACU
rno-novel-mir-850	chr11:+:88702363:88702472	CACAGCCAACUUAACCUUCUUCCUCUUAUGCUUAUUCUUCAUGGGGGUGGUAUAAGACUUCUUCCUUUUCUUAGCACCACCAGGAAGUCUCAGCAUGAGAUGGAGAGUGG
rno-novel-mir-851	chr11:+:88702363:88702473	CACAGCCAACUUAACCUUCUUCCUCUUAUGCUUAUUCUUCAUGGGGGUGGUAUAAGACUUCUUCCUUUUCUUAGCACCACCAGGAAGUCUCAGCAUGAGAUGGAGAGUGGA
rno-novel-mir-851	chr11:+:88702363:88702473	CACAGCCAACUUAACCUUCUUCCUCUUAUGCUUAUUCUUCAUGGGGGUGGUAUAAGACUUCUUCCUUUUCUUAGCACCACCAGGAAGUCUCAGCAUGAGAUGGAGAGUGGA
rno-novel-mir-852	chr11:+:88702363:88702474	CACAGCCAACUUAACCUUCUUCCUCUUAUGCUUAUUCUUCAUGGGGGUGGUAUAAGACUUCUUCCUUUUCUUAGCACCACCAGGAAGUCUCAGCAUGAGAUGGAGAGUGGAC
rno-novel-mir-853	chr11:+:88702376:88702488	ACCUUCUUCCUCUUAUGCUUAUUCUUCAUGGGGGUGGUAUAAGACUUCUUCCUUUUCUUAGCACCACCAGGAAGUCUCAGCAUGAGAUGGAGAGUGGACUACUGUUGAAUGUU
rno-novel-mir-854	chr11:+:88702376:88702489	ACCUUCUUCCUCUUAUGCUUAUUCUUCAUGGGGGUGGUAUAAGACUUCUUCCUUUUCUUAGCACCACCAGGAAGUCUCAGCAUGAGAUGGAGAGUGGACUACUGUUGAAUGUUG
rno-novel-mir-855	chr11:-:16742815:16742927	CGUGAGUGCUGAAGUGCUCUGAAUGAGCAGGGAGAGAUAAGGGGACACUGUAGUGCGAAACUGAGGCACAGUGUCCCCUCAUCUCUCUUCGGUCAUUCAAAGCACACAUGACU
rno-novel-mir-856	chr11:-:16742817:16742927	CGUGAGUGCUGAAGUGCUCUGAAUGAGCAGGGAGAGAUAAGGGGACACUGUAGUGCGAAACUGAGGCACAGUGUCCCCUCAUCUCUCUUCGGUCAUUCAAAGCACACAUGA
rno-novel-mir-857	chr11:-:16743716:16743828	CGUGAGUGCUGAAGUGCUCUGAAUGAGCAGGGAGAGAUAAGGGGACACUGUAGUGCGAAACUGAGGCACAGUGUCCCCUCAUCUCUCUUCGGUCAUUCAAAGCACACAUGACU
rno-novel-mir-858	chr11:-:16743718:16743828	CGUGAGUGCUGAAGUGCUCUGAAUGAGCAGGGAGAGAUAAGGGGACACUGUAGUGCGAAACUGAGGCACAGUGUCCCCUCAUCUCUCUUCGGUCAUUCAAAGCACACAUGA
rno-novel-mir-859	chr11:-:17120145:17120252	NNNNNNNNNNUGCCGUCUGCGCUGCGGCGGCGGCGGAAACAAUAGUGCGGAUCGUGGCGCGCGAACAGCGUCCCGCGGAGCCGGACGGUAAAGGUCCUUCUCUGAGCC
rno-novel-mir-860	chr11:-:24262889:24263000	CUCUGGCAGCUCGGGACUCAGUGCAAGGUGACUGGGAGGGUAACUAGGCUAGGUUGGCCUCUUGGGACUGCGAUUCUGGGUUUCUUCACGAGGCAAGGGCAGCCCAUCACCU
rno-novel-mir-861	chr11:-:24262990:24263103	AGCGUCGAACGACUGAAGCGGUGGCCCAUAGUGCAUUGCGAUGGCGGGUAGGCGUGUGUAGGCGGAGCCAGGGCCGGAAGUAGAACGGUGGCGGCGGCGGUGACUCUGGCAGCU
rno-novel-mir-862	chr11:-:24293634:24293745	CUCUGGCAGCUCGGGACUCAGUGCAAGGUGACUGGGAGGGUAACUAGGCUAGGUUGGCCUCUUGGGACUGCGAUUCUGGGUUUCUUCACGAGGCAAGGGCAGCCCAUCACCU
rno-novel-mir-863	chr11:-:24293735:24293848	AGCGUCGAACGACUGAAGCGGUGGCCCAUAGUGCAUUGCGAUGGCGGGUAGGCGUGUGUAGGCGGAGCCAGGGCCGGAAGUAGAACGGUGGCGGCGGCGGUGACUCUGGCAGCU
rno-novel-mir-864	chr11:-:24641329:24641436	CGAUGAAGAGGGAGCGGGUGAGGCUCUGGGCUCCCCACAUCCGUGCCAGCCGGAGGACGGGGGGUUCGAGCCUGAAUGCAGACCCUGACUCCUCCCUGCCUUGAGAUC
rno-novel-mir-865	chr11:-:24641500:24641607	AACGAGACGGGGGUGGCGGGAGCCGGAGGACACGAUCCUCCCCAUCAAGGAGCUUGAAUCUUGAGAUGCGGGGGACUGUCACUGGUAGACCGUUCCUAGCCUCCCCCG
rno-novel-mir-866	chr11:-:28822091:28822198	GUCUGGGCAAUGGCUAUGGUGGCUUUGGAGGCCUGGGCUAUGGGUGUAGCAGCAUCCACAGACUGAGCUAUGGCUCUGGCUUUGGAGGCCAUGGAUACGGCUCUGGCU
rno-novel-mir-867	chr11:-:31106479:31106591	GCUGACAGUACUGCCAGCCCAUUGUGCUGUUGACGAUUGGUAUUCGUGGAUACUUACCAAAGAGCUUCCAGAGUUCUGGUGAGAUUGCUUUGAACGGCAUUACUUUAGCCAAA
rno-novel-mir-868	chr11:-:31134947:31135060	CAUCUCCAGAGACAACAAGUAUGUUCUCCUGGCCUCGGAGCAGUUGGUGGGUGUCUGCCUGUUUGUCUUUAUCAGACCGCAGCAUGCUCCCUUUAUCAGGUCAGUGACAGACCC
rno-novel-mir-869	chr11:-:31560822:31560929	CAGUUAGAACUUCGCCUGGCGGGGGAAGGGGGAGGGCGCUGUCAACAACUCUACCGGCACCCCGCUUAGUUUACCGUCUAGACAGCCUGGAACCGGCUGCAUGCUAGG
rno-novel-mir-870	chr11:-:31640225:31640332	UUUUUGUCCCGAGGCUUCCGAGGCGUUGCGCCAGGGGUUGCUUAACUCCUGAUGUCAGCGUCUCUGGAGCCCAUGAAUCAAAGGACCCCGGGACCGGGAAGGCGCCGG
rno-novel-mir-871	chr11:-:32082919:32083030	UUUUCAGGCUACAAGGUGUCAUUGCUUUCGGUGGCUCAGUGAGUUUCCUGUCACUUUCCCAGAUUUACUUGCUGAAAAUGGUCGCCUAGGCAACACCCAGGGCGUCAUCUCU
rno-novel-mir-872	chr11:-:32082925:32083033	GUAUUUUCAGGCUACAAGGUGUCAUUGCUUUCGGUGGCUCAGUGAGUUUCCUGUCACUUUCCCAGAUUUACUUGCUGAAAAUGGUCGCCUAGGCAACACCCAGGGCGUC
rno-novel-mir-873	chr11:-:32550086:32550196	CUGGGUAGCGCUCGUCUUUGAAUGCCCCCAGGUUCCUUGCGCUGGAGGUUCCGACGUUGUGUGUGGCCACACAGGGCUCUUGUGAACUUCCGAGGGAGGCUGCUUCCAGCU
rno-novel-mir-874	chr11:-:32557881:32557991	GAGAUUCAAGAGCAGCCCACACAGUAGGCCUCCCGGCGGGUGCUAGAGCUUCGCUGUUGGCCUCACACCGUGCUCUGAGGUCUGCUUACCCUUAUGCAGAGCUUGACCCAG
rno-novel-mir-875	chr11:-:32620114:32620224	CCCCGAGAGGGUGAAGCGGGAGCCGGCGACCACGGCGCCGAUCCCAGCUGAGCGGAGCGAGGGAGCGCGCGCCGGGCAUGGAGGACGGCGCGGUGGGGCCGCGGCUCGGAG
rno-novel-mir-876	chr11:-:33801970:33802080	CCGGAAGUCAGGGCAGGGCGACUACUGCGCAGGCGUGGUGUGUGGCCUGGAGGCCCGGGUUUGUUAGCUGCUGCGGAAGAUGUGGAGUGAAUGAUAUCGGCUUGGUCCUGG
rno-novel-mir-877	chr11:-:33807191:33807301	CCGGAAGUCAGGGCAGGGCGACUACUGCGCAGGCGUGGUGUGUGGCCUGGAGGCCCGGGUUUGUUAGCUGCUGCGGAAGAUGUGGAGUGAAUGAUAUCGGCUUGGUCCUGG
rno-novel-mir-878	chr11:-:34401735:34401846	GUCAGAGUCUUCACUUGUAUGAUGUGUCUUGUGUGGCUGUGUACUUCUAACCAAGACGCAGCCACACUUACACAUUGCACUGCUUGUGUUUCCUUAAUCAGCUUUAAAAAAA
rno-novel-mir-879	chr11:-:34426086:34426198	UGUAGUUCUGAAAGCUGGUGUCUGAUGGUGGCUGAUCCGCGUGUACGGCAGACAGCAUCUGCCGCCUCUUGCAUCCAGUCUCACGAGACAGCCACCAUCACCCUGCCAUAGAA
rno-novel-mir-880	chr11:-:34450538:34450649	CUGUUGGCUGUGGAGCAGGGAAGGGAGUGGUGGUCAGCGGGAAGGGCACAAGCCAUCUGCUGAGGUUUGCAGGUUCUGCCGACCUUGGAUGCUCAUCUGUUCAAGUCCAACA
rno-novel-mir-881	chr11:-:34765532:34765643	UCUUAGGUUCAUUAAGCAGCUUGUCUGAGUCAGAUGUGGAGGCAGAAGGGAAACCCUCUUCAUCUUGCCCAGACUCCUAACAGCAAAAGAGUCAGCAACCAGCAAGCUCUUU
rno-novel-mir-882	chr11:-:35262412:35262522	GCGCACUCCUCUGCCCCGCGGUGGCCCCAGCGCCCAGCCCUCCAGCCAGAGGGAGCCAGUCACCAGACGGCAGCACCUGGCUGGAGAGGUUGGGCGGGCCGAGGGUGGGGA
rno-novel-mir-883	chr11:-:36430156:36430267	CUCCCCGCAGAGCUGUACUUCCUCAUCGCCCGCUACCUCUCAGCUGGCCCGUGUCGCCGAGCGGCGCAGGUGAGUGCGGGCCAGCUGGGUGGCGGGCGAGCGGGCGAGUGAA
rno-novel-mir-884	chr11:-:36546697:36546804	AGAGGUCCCAGGAGGCCCUGCGUGGUUUCCAUGGCGACGCCCGCGCUUCCUUAGGUCCCGGGUGGAGGCAGCUGCUGUAGGAGCGUGGAGCAGGUAACGGCCUUGGCG
rno-novel-mir-885	chr11:-:39531408:39531516	CGGGGCGGAGCCUAAGGGGACGGUCACCUGGGCUCGCCCUGAAGACCCCGGGGCUGGGGAGGAGUUCGGAUGGCGGCGCCUAGAGUGGAGCAGCAGAGGCUACGUCACC
rno-novel-mir-886	chr11:-:46286264:46286373	UAACAGCCUUUCAGCUGGCAAGGCGGGAGUGGGUUCCAUCUUCUAAGAACCCUGUUUGUUUGGAACUCCUCAGUUCUGGUUGUAGGGCCAGAAAGAGCUGUUUCUUGAAC
rno-novel-mir-887	chr11:-:53574736:53574843	GGCCCGGCGGGGCAUCUGUGCUCCUGCCUCCUCCCUCUGCUCUCCUUCCCUAGUCCCUUUCCCCCUCGGGGAGAGCGGACUGAAGCUCCUCACUCUUCAGUGCGCACA
rno-novel-mir-888	chr11:-:53731789:53731896	GCCGGCUGAACCUAAAGGGGGCGGGGUCUAGUUGCCAUGGUGACCGGCAGCCCUGCGGUCGCCUGGUAACGUUGGCGACAGGGCGGUCUGCGGGGUGCGGGCGGCGGU
rno-novel-mir-889	chr11:-:58080651:58080758	GGAGGAAGUCGGGAGGGUAAGCGAAAGGAGGGGCGCGGAGGACUGGCUUAGGAGAACUCGGCUGGGACAUGUAGCCCCGCCUGCCGUGCUCGAACCUUAGACUGGGGG
rno-novel-mir-890	chr11:-:58661245:58661357	ACAAGGUACAGGGCUAUGGCAAAGGCCCUUUGGAGGUAAGCAAGCUUCAGAGAACUGAGAAAUGGGCAACACUGAAGUCUGCCUGCCUUAGGAGAGCCUUUGCCCAGUUAUUU
rno-novel-mir-891	chr11:-:58764439:58764547	AGAAGAGGAAGAUAGCUUUCUGAUCUUGAGAGGAGGCUGCUCUGGCUGUCCCUAGUGGGCAGAAGAGAGGAGGCUGCUGAAAGGGUUUGGCUGCAAAAGACUAUCUUGG
rno-novel-mir-892	chr11:-:59705848:59705958	CUCACUGUCUUACAAUCCUGUGGAGCAUUAGAUACUGCGUCUGAUUCUUUGUCAUUUUCAAAGUCCAGAUGUGGCCACUGUUGUCCUGGACAUUAUUGGAGUGAUUUAUUC
rno-novel-mir-893	chr11:-:60669321:60669432	UUCUUUUUCUUGACUGCCAAAAUGGUGGUUUGGGUCUUGAUUAUGCAACUGCCUAAGAGAGCAGUUGACACAGUUUAAGCGCUCUCUACUCUUGGUUGUCUCUGGAUUUGGC
rno-novel-mir-894	chr11:-:61530774:61530881	UGCGGUUGCGCGCGACGCGGCGGACGCGCCGGCGCGCUGAGGGGGCGGGGUGAAAGGUCACAGCGCGGCGGCGGGUCUGGCUGGCGGCAGCUGCGGGCGGGAGCUGAG
rno-novel-mir-895	chr11:-:62125311:62125419	CAUGUGUUCCAAAACACAAAACUGCAGGGGAGCGGUAAGGAUGGGUAGGAAGUGAAGCUUACCUAUCUAAACUUCUCCCUGUGGGUCUGCACUCCUAAGCAUGAGGUGA
rno-novel-mir-896	chr11:-:63999018:63999125	CAUUUGGAUGGAGGGGUAAGGAGGAGGGGGACUGGGUUCAAAAUAUUCAAAGUUCUCAGGAUCCUAGAGAACCUCUUACUCUGAACCUCAUCUGUUCAUUUUCUUAAU
rno-novel-mir-897	chr11:-:64752467:64752574	GGGGGCCAGCUCGACGCAGAGCUGACGUCAUCGCCGUGCGCUGCCACGUCUCCUCAGCUCCUGGGCGAUGGAAGCUGAGGAUGAUGAGGCUUGGUGAUGCCCAGUCCG
rno-novel-mir-898	chr11:-:64871947:64872057	AGUGAUGCUUGAAAAGGGAACUCUGAACUCCUGGGCUUUCCCAGUGUGCCUGUGAUGAAGUGAAAAUUGGCACACAGAGAGAACAGGAUGUUCAGGGUCGUCUCUUGUUAU
rno-novel-mir-899	chr11:-:65112622:65112731	UCUCGGUACUACAGGGCACCAGAGCUGAUCUUUGGAGCCACCGAUUACACGUCUAGUAUAGGUAAGUGCUGGCUCUGGGUGCGGUGGGUGUGACUGUUAACUGUCCUGAC
rno-novel-mir-900	chr11:-:65841596:65841703	CCAAGUAUCAGUUUGUUUGGCCCUGGAGUCUUGAGGAGUAUAAUUCAGUCCCUCUGCCGUGACAGGCUAGAGGAGACACACAGCCCAACUGCCUGCUUCAGGAGGACA
rno-novel-mir-901	chr11:-:66742913:66743024	AAGCUGCCUCUGGGACUGAGAAGAAAGGAAGGCUAAGUAAGAGAGGGAGGAAGCAGAGUCUGGCUAAUCAUUUUGCUUUCCCUUCUCUCAGUCAGCGGUGGGCUUUGACUAC
rno-novel-mir-902	chr11:-:66742916:66743024	AAGCUGCCUCUGGGACUGAGAAGAAAGGAAGGCUAAGUAAGAGAGGGAGGAAGCAGAGUCUGGCUAAUCAUUUUGCUUUCCCUUCUCUCAGUCAGCGGUGGGCUUUGAC
rno-novel-mir-903	chr11:-:67655039:67655148	GGCUUGGCAGAUUUCCUUAAAGCAGGAAGGAGAGAAGCAUAUAUUAGUUUGUAUGGCUUUUGCUUCUCUUUGGUUUUGUUUCCUAGGAUUUGGAAGUGGUUCAGUUUUAA
rno-novel-mir-904	chr11:-:67906395:67906502	GCCGGUGUGUUCGGAUCUUGACUGGGAGACUGAGGCUACACUUCCGCGCAGCGCAUGGGUGCAGGCAGGCAGCUUCUGCUCCUCGUUCCUUUAUCCGGAGCGGCUGCA
rno-novel-mir-905	chr11:-:68309597:68309709	CGGGCAUCCUCCAGCCUGGAUUCUGGAGCUGGGAUGGCCGCAUCUCUCCUUCCGAUGACAAGCCUCCCUUCUCCCCAGGUUCUGUAAUGAAAAUACGCCUUGCCCGGUGCCCA
rno-novel-mir-906	chr11:-:68466230:68466337	GCCGGUGUGUUCGGAUCUUGACUGGGAGACUGAGGCUACACUUCCGCGCAGCGCAUGGGUGCAGGCAGGCAGCUUCUGCUCCUCGUUCCUUUAUCCGGAGCGGCUGCA
rno-novel-mir-907	chr11:-:68705586:68705695	GCGACCAAGGUGGCGCUGAAGGUGGUGACGCCCAUCAUCAUCUCUGUCUUCGUGCUGGCUCUGUAUCUGCAUGCUCAGCAGGUGGAAUCCACUGCUCGCCUUGACUUCCU
rno-novel-mir-908	chr11:-:68722903:68723015	ACCGCCAGAGAACCAACUCCAUUGGACACAAUCCGCCUCACUGGGGAGCUGAGCGCCCCUUCUACAACCACUUGGGUGGCAACCAGGUGUCCAAGGAGAUGAAGAGGAUGGUG
rno-novel-mir-909	chr11:-:68827734:68827845	CACCAUGCUGCAUGGAUGGGAGCCAUUGGCCCUCUGACUGGCCCAGAGUAGAUAUUGCCAGUGGGGAUGUGCCUGGGCUCCCAUCUCAGCCAAGAGGCGGCAGAAGCAGAGG
rno-novel-mir-910	chr11:-:68843086:68843197	AGGCCCGGGCGGCGCGGGGGGCGGGGAGGCGGCGGGAGGAGGGGAUGCGGAGGGCGCUCGCCGCCGCCGCCGCCGCCGCCGCCGCUCGCCGCGAGAAGGGAGGAGCGGCGCG
rno-novel-mir-911	chr11:-:70512401:70512513	ACUGUGAAAUCGCAGAGGCCCGCCAGGCUCAGCUUGUCUCUUCUUCCUCCGAGAAGCAUCAUCUCCACAUGCUGGGCUUCCCUGUGUGGGCUUAGAAAGCUUUCCUGCCUGAU
rno-novel-mir-912	chr11:-:71108108:71108217	GCAGAGCCGGGCCGGAGAGUUGUCGGCUGGGAAAUGGCGGCCGCGGGCUUGGUGGCUGUGGUAGCGGCUGCGGAGUACUCUGGCCCAGUGGGGUCCGGGGGAAACCUCUC
rno-novel-mir-913	chr11:-:71419090:71419197	GUGGAGCGCGGGCCGCUGCAUUGCGGACUGAGGAGGUGCUUCAGAGUGAGUGACUCUCCUGUCAGUGGCACGGCCCAUCGUGUUCAUCGCGUGGCGGACGGACUAGAA
rno-novel-mir-914	chr11:-:71502788:71502895	CUGGGUGGGCGACAAUGAUGGCCUGUGUCACAAGGAGGUUGGAGCAGGGAGGCUGGCUCUUCAGUGGAGCACUGGCUUGGGGUAGGACGGCUCCCUCCGCCUCAGAGU
rno-novel-mir-915	chr11:-:71795771:71795879	GCUUGAUGGGAUUGGAUGCUGCGCCUGAGGUCAUCACUACGCGCCACCGGGAACUGGAAGCCCAGGUAUGAGGCUGUUGGCUAGUGGGAUUCUGAUCUGUUCUCAAGUG
rno-novel-mir-916	chr11:-:72228924:72229037	GAAGGGAUUUUUAUCUCUUUCAUCCUUGCUGGGGGACCUGCUGACCUAAGCGGAGAGCUCAGAAAAGGAGAUCGCAUUAUAUCGGUAGGCCUAAUACUUGGAUGUUUUUAUUAU
rno-novel-mir-917	chr11:-:72965486:72965594	CAGCGCCAUUGUGCAGAACAACUAUUCAUAGCUGGUGGGGGUGGGGGGCACACAUGAAUGGGAGUCAGACUGAGGUCCGAGAAUGUGUGUGGUUAUGCAAGGAUGGGGG
rno-novel-mir-918	chr11:-:73679642:73679752	UCCCCUGUCCGCGCGGUGAAUGGUUCGCGCCGGCCUAUAUUAACCCGAGAUCUUCCUCUCGGACAGCAAUGAUGUGAGGCGAGCGAGUCGGCUACCGCGCGCACGACCACA
rno-novel-mir-919	chr11:-:73679646:73679755	UCCUCCCCUGUCCGCGCGGUGAAUGGUUCGCGCCGGCCUAUAUUAACCCGAGAUCUUCCUCUCGGACAGCAAUGAUGUGAGGCGAGCGAGUCGGCUACCGCGCGCACGAC
rno-novel-mir-920	chr11:-:73836941:73837049	CAGCGCCAUUGUGCAGAACAACUAUUCAUAGCUGGUGGGGGUGGGGGGCACACAUGAAUGGGAGUCAGACUGAGGUCCGAGAAUGUGUGUGGUUAUGCAAGGAUGGGGG
rno-novel-mir-921	chr11:-:74280845:74280952	GGCGCUGAGUAAUGCUGGGGAGACAGGAGGAGGAUCUAUACGAGGAGGAAACGACUUUUGCGACCUACUAGUCUGCAAAGCCUGCUCCAGAUCACCCUGUAUGCAGGC
rno-novel-mir-922	chr11:-:75606657:75606766	CAAUGGAAGUUGGCAGGAAGAUGUGGGCCCGCUUCAGAUCCCCAAAUCUGGAAAGCCAAUCUGAUGCUUUCGCCUGUACUUCCUUCUUUCCCUUCAGGCUUCCUGAAAGA
rno-novel-mir-923	chr11:-:75904495:75904602	CUGCAAACUCUCGCCCUCUGCUCCCUCCCCCUCCCUGUUGCCCUCCCUCCCUCAUCCUCGAGGGCCAAGCACCCCGGGGAUCGGCGGGGUCCGGAAAGCGGGCUCUCC
rno-novel-mir-924	chr11:-:77464126:77464237	UCCUUGUGAUAUAGGUCAAUGAAGUGUACUUGGGCUUUGACACUCACAGAGUGUAUGCACCCAAAAGACCAGGGCUGUGACACUCUCAGGGUGUGUGUACCCCAAGGAGCGA
rno-novel-mir-925	chr11:-:77888515:77888627	UCUUAGGAAACUGCUUCUAAAUGUCUGUAGGGAACCCAUUCAGCCACCAUUUGGUCACUAGUGUUGCUGACCCAUCUGGCUGACUGGAGUUUUCUGUAUGUGUUUUGAGAAUU
rno-novel-mir-926	chr11:-:78836629:78836738	CCGAAGUGCUCCUCUGGUUCUUGGUCUGUCUCUGUCUCUUUCUUUUUCUGCCUCUGUUUUUCAGGUAAGGAGGGAGGGAAGAAGAGAGAGAGGGAGAGAGAAUGAAGGAA
rno-novel-mir-927	chr11:-:81375771:81375883	AGGAGUGGAAGCUGGACACUCUUUGUGACUUGUAUGAGACUUUGACUAUCACACAAGCAGUUAUUUUUCUCAAUACAAGGCGCAAGGUGGACUGGCUCACGGAGAAAAUGCAU
rno-novel-mir-928	chr11:-:81376480:81376592	AGAAGAAGAGUAACUGCACUGGAUUCCAAAGACUGGGGUGGACCUCUUUCUUAAUGUCCAGUGUCCUUUGUCAUAAGAUUCGGUGCAAUAAGUCUUUAGAUCAAUUCUCCUUG
rno-novel-mir-929	chr11:-:82886467:82886577	GUCCUUUUUUAUUUUCUGAAAUCACUCUUGGGACUGCCGUCCUCGCUGCUGGGGGCAUAACGGGGUCGGGGACGUGGUGGGGACGACGACGGAGGGCAGGGGGAAGGGUUG
rno-novel-mir-930	chr11:-:83907698:83907808	GUCCUUUUUUAUUUUCUGAAAUCACUCUUGGGACUGCCGUCCUCGCUGCUGGGGGCAUAACGGGGUCGGGGACGUGGUGGGGACGACGACGGAGGGCAGGGGGAAGGGUUG
rno-novel-mir-931	chr11:-:83920840:83920950	AACCCCAUCACCACCCCCAAUUUUGGAGCCGGGGUCUGAGUCUAAUCUUGGAGUCCUCUCUAUUCCUGGGGACACUAUGACAACGGGGAUGAUACCAAUUUCUGUAGAAGA
rno-novel-mir-932	chr11:-:83920937:83921045	GACCGGUCACAGGGAGCAGCCAUUGGGGGGCGGCCAGGGCUGCCUGGCCCAGAGCACAGCCCUGGCACAGAGUCUCAGCCUUCGUCGCCUUCUCCAACCCCAUCACCAC
rno-novel-mir-933	chr11:-:83976663:83976773	GGCGGGCUCCGGGCUGGUCCGCACCACCACUACCGCCGCCGCCGUGGUGCUGAAGCGGACAGCUCCGAAGCGCCUGGCAGCGGCGGUAGCAACACUGACCCCGCGGCGGCU
rno-novel-mir-934	chr11:-:84017365:84017476	AACCGGAGAGGGUGGAUCCUUGUCUUUUCUGUCUGACUUACUUUUGUUACGAUAGAAAGCUGUCAGAAGUAAAGAUCAAGGAGGUGCUCUCAUGACAACUCCCACAGUCACU
rno-novel-mir-935	chr11:-:84017365:84017477	CAACCGGAGAGGGUGGAUCCUUGUCUUUUCUGUCUGACUUACUUUUGUUACGAUAGAAAGCUGUCAGAAGUAAAGAUCAAGGAGGUGCUCUCAUGACAACUCCCACAGUCACU
rno-novel-mir-936	chr11:-:84017366:84017477	CAACCGGAGAGGGUGGAUCCUUGUCUUUUCUGUCUGACUUACUUUUGUUACGAUAGAAAGCUGUCAGAAGUAAAGAUCAAGGAGGUGCUCUCAUGACAACUCCCACAGUCAC
rno-novel-mir-937	chr11:-:84049776:84049884	GGAGGCAGCAGACAGGCGAGCUGGGGGCGGGCGGACAUCUUGGGAUCCGAGAGUGGCCAGGCCUGCCUUGUGGGGGCUGCUGACUCCAGGUGAGCUGGGAAGCUUGACU
rno-novel-mir-938	chr11:-:84049780:84049887	AGCGGAGGCAGCAGACAGGCGAGCUGGGGGCGGGCGGACAUCUUGGGAUCCGAGAGUGGCCAGGCCUGCCUUGUGGGGGCUGCUGACUCCAGGUGAGCUGGGAAGCUU
rno-novel-mir-939	chr11:-:85168245:85168352	GGAAGGUCUCCUGUGUCCCUGGUUAGAGAAAGCCUCAUGUGUCCCUGGUUAUGGCAAACCUCCUGGAAUACAGGCAGGCUGUGAGGAAGUGGGGACAGGCCCAUGGAU
rno-novel-mir-940	chr11:-:86303401:86303508	GCCACUCAGUGCAGACGUCCUGUUUAGUGCGAGUUUGCUUGGAGCUCAUUGGUCUAAAUCUCUGUCACACAGGACCUGGACAUGGCGGUCGCAGGCAGCUGGCAAGUG
rno-novel-mir-941	chr11:-:86356254:86356365	UCCUCCUCGAAGCUUGGGGUUUGGGGGGUGGGCCGGGUAAGACUUUGCUUAGUAAAUGGUUUGAACACUUUCAACUGUGUCCUGUCCUCUGUCCAGCCACUCCUAGUGCCCA
rno-novel-mir-942	chr11:-:86356304:86356415	CCCCCAAGGUGAGGGGGCCUGUAGGUACCAGAGCCUUAGAAGGGUUGCCUUCCUCCUCGAAGCUUGGGGUUUGGGGGGUGGGCCGGGUAAGACUUUGCUUAGUAAAUGGUUU
rno-novel-mir-943	chr11:-:86356503:86356614	GCCGCUAACAGUUCCUACUGAGUCCUGGGGAGUGCUGGAUGCUGCCUUAAUGUCCGGUGGUACCUGCUAACCUGAAAGGGCAGCUGGGGAAACCCUGGGGCUGCCAGAGGAA
rno-novel-mir-944	chr11:-:86674309:86674419	UCAAUUUGGGAAUGUGGCGGUGUGGGGGUGGGGCUGGAGUGAGGGGUAAACGAUGCACAAAAGGCAUAUCUGAUUCCAGACCUACUUUCCAGGUCCCCACAACUGUCUUUA
rno-novel-mir-945	chr11:-:86674310:86674419	UCAAUUUGGGAAUGUGGCGGUGUGGGGGUGGGGCUGGAGUGAGGGGUAAACGAUGCACAAAAGGCAUAUCUGAUUCCAGACCUACUUUCCAGGUCCCCACAACUGUCUUU
rno-novel-mir-946	chr11:-:86674310:86674421	UUUCAAUUUGGGAAUGUGGCGGUGUGGGGGUGGGGCUGGAGUGAGGGGUAAACGAUGCACAAAAGGCAUAUCUGAUUCCAGACCUACUUUCCAGGUCCCCACAACUGUCUUU
rno-novel-mir-947	chr11:-:86744518:86744630	CCUUGGCAGGGAAUUCCUAGAGCCCUGGACAAGAUGUGGAGGGGCAGGGCUGGCAGCUACUGUGGAGGUGUUGGCAGGAUCUGUUCAUCCACAGGGCCUUGGAAGACACCGCA
rno-novel-mir-948	chr11:-:87187665:87187776	UUCGGUCACCCUGAGCUCUGUCUGCCUGCAGGCACUAGCUCUGCCCCAACACUGUGGUUUCAGAGCAGUGUGUGCUAAGGCAGUAAGAGCAACAAAGGCUCGAAAGGACAGA
rno-novel-mir-949	chr11:-:87210159:87210270	CCCGGAAACCUCGCUCGCACACUAGACGGUCUGUGCUCUCCAUGGUGCACGUCAAGGCAGGCACAGCCCGUCUCUUGUGUUCUGCUCCGUCCGGGUCAGCUUUUGGAUCAUG
rno-novel-mir-950	chr11:-:87210160:87210270	CCCGGAAACCUCGCUCGCACACUAGACGGUCUGUGCUCUCCAUGGUGCACGUCAAGGCAGGCACAGCCCGUCUCUUGUGUUCUGCUCCGUCCGGGUCAGCUUUUGGAUCAU
rno-novel-mir-951	chr11:-:87242893:87243000	GGUAAACCUGGGUCCAAAGGCGACAUCCUCGAGGCUCUGAACCCUGGUACACUCCAACUUGUGCCGGGGCAGGGGACGCCCAAAGGCCCGCAGACAGGCCUCGCCUGU
rno-novel-mir-952	chr11:-:87676772:87676883	AACACAGCUGGGGACUUUCAGACCAUGAUAAAAGUAUUCUAGCAAGGGAUGGUAUACAUAUAUAGAAUACUUUUAUCAUGGUCUGAAAGUCCCCAGCUGUGCAAAUACAAGG
rno-novel-mir-953	chr11:-:87676778:87676888	AUGACAACACAGCUGGGGACUUUCAGACCAUGAUAAAAGUAUUCUAGCAAGGGAUGGUAUACAUAUAUAGAAUACUUUUAUCAUGGUCUGAAAGUCCCCAGCUGUGCAAAU
rno-novel-mir-954	chr11:-:87676786:87676895	GGAGCAAAUGACAACACAGCUGGGGACUUUCAGACCAUGAUAAAAGUAUUCUAGCAAGGGAUGGUAUACAUAUAUAGAAUACUUUUAUCAUGGUCUGAAAGUCCCCAGCU
rno-novel-mir-955	chr11:-:88122110:88122220	GCGCGCGCGCGUUCCUCCUGCACUACUAUUGGAUCAUGUGCAGCAGCCCCACCCCCAGCUUCCAAGGCGGUAGCUGGGAGGGGGCCGGAGACAGCAGGAGGAUUUUAACUG
rno-novel-mir-956	chr11:-:88317189:88317303	GCUCCUGUACCUGCAUGCCCUUGGGGAUGGUUCUAAGCACAUGGGACGUGGGAAACAAAGGUUCCUCUGCUUGUUCAUUCCCAGGGGAUGUCUUCCAGAAGCCUUAUGUGUCUGG
rno-novel-mir-957	chr11:-:88317190:88317303	GCUCCUGUACCUGCAUGCCCUUGGGGAUGGUUCUAAGCACAUGGGACGUGGGAAACAAAGGUUCCUCUGCUUGUUCAUUCCCAGGGGAUGUCUUCCAGAAGCCUUAUGUGUCUG
rno-novel-mir-958	chr11:-:88317192:88317303	GCUCCUGUACCUGCAUGCCCUUGGGGAUGGUUCUAAGCACAUGGGACGUGGGAAACAAAGGUUCCUCUGCUUGUUCAUUCCCAGGGGAUGUCUUCCAGAAGCCUUAUGUGUC
rno-novel-mir-959	chr11:-:88317193:88317303	GCUCCUGUACCUGCAUGCCCUUGGGGAUGGUUCUAAGCACAUGGGACGUGGGAAACAAAGGUUCCUCUGCUUGUUCAUUCCCAGGGGAUGUCUUCCAGAAGCCUUAUGUGU
rno-novel-mir-960	chr11:-:88343566:88343673	UAGGCGGGGUUGGCCCAAAGCAGCUCGUGGGGAGCAUUGCGGCAGGCUGGCAGGUGAGGCCCGCGGGGCGCUGGAGAUGAAGAACGAGGGUAAGGGUGGAAGACUCGG
rno-novel-mir-961	chr11:-:88710276:88710384	GGAGAAGAGCAGGGCUUGACAUGGGGUCCUUCGGAGCUAGGAACAGUUCUAGUGGAAUCAGCCCCACCUGACUUCUGUAGUGUGUCUCUGACCUAGAAGGAAGGAGGGA
rno-novel-mir-962	chr11:-:88710340:88710448	CUUACAGAAGCCCUGAAUGUCACACAAGAGAAGUGGAAGCAGAAGUCUGCUUUCUGUCUGGAAGGGAGAAGAGCAGGGCUUGACAUGGGGUCCUUCGGAGCUAGGAACA
rno-novel-mir-963	chr12:+:10209687:10209797	CCCCCUUUUUGGGGAAAAAAUUUUUUUUCAAACUUUUUUUUUUUUUUUUUUUUUUUUUUGGGGGUCCGUUCCCCAAAAAAAAAAAAAAAAUCCCCAAAGGGUUUCCUUUUU
rno-novel-mir-964	chr12:+:10391104:10391212	UGCGGAGAAGGCGGCGCAUCCUCAGGCCUCCUCCUCCAAGGUGGAGAACCAAGGGUCCUGGGUACCCAAUCUGCCAGCGGACCCCUUGGAUCCCCACCUGUAGCCUACC
rno-novel-mir-965	chr12:+:11191804:11191911	GCGGCCGAAUUUCUGCGGACAACAGGACUUCAAGAUGGCGUCUAUCGGUAAGUCCUCGGCUCUUACCUGGCCAUGGGGUUGGAAGCCCGAUUUGGGCAGAGGCUCCAG
rno-novel-mir-966	chr12:+:11191851:11191958	GUAAGUCCUCGGCUCUUACCUGGCCAUGGGGUUGGAAGCCCGAUUUGGGCAGAGGCUCCAGGGCCACAGUAGGGUGAGAAGGAAGCGCGGGAACUCUUGCUCUUCACC
rno-novel-mir-967	chr12:+:11411252:11411363	AGCCUAUAGCCACCAUCUCCUCACUUGCAUGUACACUUUCCUGAGGGCCUCCUCAAACCCAGGAAGUUGUGCAUGCAGGAAAGGAGGCGUUUCGUGUGCUUUACUCCUGGCU
rno-novel-mir-968	chr12:+:11411253:11411363	GCCUAUAGCCACCAUCUCCUCACUUGCAUGUACACUUUCCUGAGGGCCUCCUCAAACCCAGGAAGUUGUGCAUGCAGGAAAGGAGGCGUUUCGUGUGCUUUACUCCUGGCU
rno-novel-mir-969	chr12:+:11411253:11411365	GCCUAUAGCCACCAUCUCCUCACUUGCAUGUACACUUUCCUGAGGGCCUCCUCAAACCCAGGAAGUUGUGCAUGCAGGAAAGGAGGCGUUUCGUGUGCUUUACUCCUGGCUGU
rno-novel-mir-970	chr12:+:11411254:11411365	CCUAUAGCCACCAUCUCCUCACUUGCAUGUACACUUUCCUGAGGGCCUCCUCAAACCCAGGAAGUUGUGCAUGCAGGAAAGGAGGCGUUUCGUGUGCUUUACUCCUGGCUGU
rno-novel-mir-971	chr12:+:11411254:11411366	CCUAUAGCCACCAUCUCCUCACUUGCAUGUACACUUUCCUGAGGGCCUCCUCAAACCCAGGAAGUUGUGCAUGCAGGAAAGGAGGCGUUUCGUGUGCUUUACUCCUGGCUGUA
rno-novel-mir-972	chr12:+:11438937:11439048	AGCCUAUAGCCACCAUCUCCUCACUUGCAUGUACACUUUCCUGAGGGCCUCCUCAAACCCAGGAAGUUGUGCAUGCAGGAAAGGAGGCGUUUCGUGUGCUUUACUCCUGGCU
rno-novel-mir-973	chr12:+:11438938:11439048	GCCUAUAGCCACCAUCUCCUCACUUGCAUGUACACUUUCCUGAGGGCCUCCUCAAACCCAGGAAGUUGUGCAUGCAGGAAAGGAGGCGUUUCGUGUGCUUUACUCCUGGCU
rno-novel-mir-974	chr12:+:11438938:11439050	GCCUAUAGCCACCAUCUCCUCACUUGCAUGUACACUUUCCUGAGGGCCUCCUCAAACCCAGGAAGUUGUGCAUGCAGGAAAGGAGGCGUUUCGUGUGCUUUACUCCUGGCUGU
rno-novel-mir-975	chr12:+:11438939:11439050	CCUAUAGCCACCAUCUCCUCACUUGCAUGUACACUUUCCUGAGGGCCUCCUCAAACCCAGGAAGUUGUGCAUGCAGGAAAGGAGGCGUUUCGUGUGCUUUACUCCUGGCUGU
rno-novel-mir-976	chr12:+:11438939:11439051	CCUAUAGCCACCAUCUCCUCACUUGCAUGUACACUUUCCUGAGGGCCUCCUCAAACCCAGGAAGUUGUGCAUGCAGGAAAGGAGGCGUUUCGUGUGCUUUACUCCUGGCUGUA
rno-novel-mir-977	chr12:+:12025645:12025753	GGCGGGGCGGGGGCGCGUCUCUAAGCUGGCCGGGGAAGCUGGGCUCUACCGUGGGCCGGAUGCCUGCAGCGUGAGUGCAGGGUCCCCAAGGCUCCUUAGGAAAGGAAAA
rno-novel-mir-978	chr12:+:12374762:12374869	AGGACCCGACUGUAGCUAAAGCCUUGGAGUUCAGAAGCCUCGGCUGGGAACCCGCCCCGCCGGGCGUGGGCCCAGGUAAGUGCGGCGCGGUGUCCCCGCAUUAGCGGU
rno-novel-mir-979	chr12:+:13090118:13090226	CCGAGGGGGAGGGGAGGCCGGAUGUGAGUGGAGCGGCCAUUUCCUGUUUCUCUGCAGUUUUCCUCAGCUUUGGGUGGUGGCUGCUCCUGUGCUCGCCUUCCAGUCCGCU
rno-novel-mir-980	chr12:+:13715801:13715915	UGUGGCGUCCUAUAAAACCCGGCGGCGCAACGCGCAGCCACUGUCGAGUCCGCGUCCACCCGCGAGUACAACCUUCUUGCAGCUCCUCCGUCGCCGGUCCACACCCGCCACCAGG
rno-novel-mir-981	chr12:+:14077463:14077572	UCCCUCCUGUCCGAGGGAGUUUUGGAGUGGGCUGUUUGGGGGCAGUGCAGGAAGAUCAAGGCACACAUUCCAAGCAGCUCCUCACACUCUGCUCCACCAUGGCUGGCUCU
rno-novel-mir-982	chr12:+:14077615:14077725	CUGGCCCUUUUUUCUCAUCUCAAAGAACACAGAAAAACGACACUGUUCAACAGAGGGAUUUUUUCUUAGUGUCAUGAGAUGGCUCUCAGAGGCCCCUCUGAUGGGCCUAGG
rno-novel-mir-983	chr12:+:14155920:14156030	GGGUGAGGUACAAGGUCUCUUCUGGGGAGAGCAUGUGUCAGCACCAGCAGCAUCUUGAGGCCCCUGCUUCUCCCCAGCACACACCUCUGGAGGCCCCGGGACUCUACAUAC
rno-novel-mir-984	chr12:+:14279876:14279984	GUGCGCAGGGCCGGUGACUCUUCUGGGAAGUGGGGCCGGGAAUGGGGCACAUUAGCCAGGAUCCUGCCUAACUUCUUUGACCUUAGUGUCUCCAGUGGACGCUGCGAAC
rno-novel-mir-985	chr12:+:15934129:15934238	GGCCUUCGAGAACAAGGCAGGGCUGCCUGUGGAGCCUGCCACCUUCCAGCUCUACGUUCCAGCCCUGAGCGCACUCUGGAGAGACUCCGGGAUCAGGGAAGCCUUCAGCC
rno-novel-mir-986	chr12:+:15970385:15970497	UUCUUGGAGCAGAUGCUAAGCCAGGAGACAGGAUGGGGCUGCUUCUUAGAGCCCUUGUUAUGGCAGCGCUCCAUCUAGGAAACAGCAGUCAGUCUCUCCUGCUCACUGUUCUC
rno-novel-mir-987	chr12:+:16042811:16042921	UCCCAGGGAGGCCUCUUGGUGCCGUGGGAGGCAGAGGGAGGAAGAACCACUAGGGCUUUACCAGGCUGUCUGUCUCCAUCUGCUUCCCACAGGGCCCAGACUUCGUGCGAA
rno-novel-mir-987	chr12:+:16042811:16042921	UCCCAGGGAGGCCUCUUGGUGCCGUGGGAGGCAGAGGGAGGAAGAACCACUAGGGCUUUACCAGGCUGUCUGUCUCCAUCUGCUUCCCACAGGGCCCAGACUUCGUGCGAA
rno-novel-mir-988	chr12:+:16042814:16042925	CAGGGAGGCCUCUUGGUGCCGUGGGAGGCAGAGGGAGGAAGAACCACUAGGGCUUUACCAGGCUGUCUGUCUCCAUCUGCUUCCCACAGGGCCCAGACUUCGUGCGAACCUU
rno-novel-mir-989	chr12:+:16122808:16122916	GGCAUUGCAGAGUGCAACCCUAGGGCGGGUGGGGGGUGCUCGCUGCAGAGGCAGCAAGCUCCCCUACAGCCGCCAGCCUUCACUUUGCUUUUGCGCACAAAAGGGUCUC
rno-novel-mir-990	chr12:+:16340935:16341043	GGCGAGCGGGCUCACAUGACUGGCCGCGCGAUGGACCCGCUGCCCUCGCCGGCAGUCGCUGCAGCAGCUGAGGCGGAGGCUGACGAGGAGGCGGAUCCGCCGGCGACAG
rno-novel-mir-991	chr12:+:17284960:17285068	AGACCAGACUGUCCCACACCAGGACUGGUCAGGCUGGAUGCAUAGACAGUGACUAGUCACUGGCGAAAAGAACAGUGCAUGCUUUUGUUGUUGUCCUUGUCGUUGUUUG
rno-novel-mir-992	chr12:+:17330110:17330220	GUUUCACACACAUAGCCUGAUGUCCUACUCCAGCCCCUGGCCAGCCCUGCACAGACUGUGGACGGGAGCUUGGACUGACAUCAUGGUAGCAUGCCGGGCCAAGAAGGGGCC
rno-novel-mir-993	chr12:+:18138871:18138978	UUGGGGAGUGUGGGCGGGGAUGUGGAAGAACAAGUAGUCAGACUCCAGUGGAGCUGGCCUAGGUUCUGGAUUUGCGAUCCUGCUUUCUGUACAUUUGUGAAGUUCGGA
rno-novel-mir-994	chr12:+:18139573:18139680	CACAGCUGAAGGAGCCCAGGAUGACAGGUUCUUAGCUUCAGCUCUUGGGAGCUCUGGCUCCUGUCAAGUCUUGGUGUUUAGACUUUAGUCACUUCUGUAGGCCUGACC
rno-novel-mir-995	chr12:+:18891545:18891652	CUCUUGUUUCAGGCAGUGGACGACCCUGGGGGGACCCGCGCCCAUCAGUCCGGAGCGCGAGUGCCCGCUAGGGGGUACCCGGCCAGGUAACUGGAAUGGGAUGAGAGG
rno-novel-mir-996	chr12:+:18996624:18996731	CUCUUGUUUCAGGCAGUGGACGACCCUGGGGGGACCCGCGCCCAUCAGUCCGGAGCGCGAGUGCCCGCUAGGGGGUACCCGGCCAGGUAACUGGAAUGGGAUGAGAGG
rno-novel-mir-997	chr12:+:19394982:19395094	UCACUGGGGGCUACGCUUCCAUCCCGGACGAGCCCCCAUAAAAAUGUAAAACUCUUGCUCUAGUCUCAGGAUGGAGCACCCCAGGUAACACGAGAGACCAGUCUUGAUGUAAA
rno-novel-mir-998	chr12:+:2060305:2060417	GUGGACCAGGUAUAGCGAGCACGCGUCAGGGGUUUGGGGGAGAACUGGAUUGAACAAGUGGAGCUGACAGAUUCUCCCCUUCUCUACCUGUAGUACCUGACACUACCCGAGAU
rno-novel-mir-999	chr12:+:2060306:2060417	UGGACCAGGUAUAGCGAGCACGCGUCAGGGGUUUGGGGGAGAACUGGAUUGAACAAGUGGAGCUGACAGAUUCUCCCCUUCUCUACCUGUAGUACCUGACACUACCCGAGAU
rno-novel-mir-1000	chr12:+:2060306:2060418	UGGACCAGGUAUAGCGAGCACGCGUCAGGGGUUUGGGGGAGAACUGGAUUGAACAAGUGGAGCUGACAGAUUCUCCCCUUCUCUACCUGUAGUACCUGACACUACCCGAGAUA
rno-novel-mir-1001	chr12:+:2138217:2138324	AAAGCAGACCGGGGAUGUGGCUCCACUGAAAGAGUUGUUUCCUUCUCCGUUGGAAGCACUGAGUUUCAGACCCAGGACCAGAGAACUUGGGCAGGGGAGACCACACCU
rno-novel-mir-1002	chr12:+:21720611:21720720	CGCACUGUAGCGGAGGCGUCCGAGGCCUGACGUAGGUGAAGGGAGGAGAGGAAGGCGUGGUUCUCUAGAUGUUCCUCGCUGGUGGAAGGGAGGUCGCCUGAACGACCAGG
rno-novel-mir-1003	chr12:+:21720661:21720770	GAAGGCGUGGUUCUCUAGAUGUUCCUCGCUGGUGGAAGGGAGGUCGCCUGAACGACCAGGCCGUUUCAGGGGAAGAGGAAUUUGUACAGCCUCGAUGUUUUAGUGCUUGC
rno-novel-mir-1004	chr12:+:21721576:21721684	GAAAAGGGUGUCAGCGCACGCGCAGUUGGUUCCUCGGCUUGUCCGGGUCUCGCGGGCAUCUUGUUUUGGUCUCGCGGGCGAGUGGAGCGCGCUUGGUGUGUUGCGGGAG
rno-novel-mir-1005	chr12:+:21761551:21761659	AGCUGGCCCGGAGCCAGGCCUGCCACAGCCGCAGCCGCAGCCGCAGCCGCAGCCUACAGUUGCAGCUGCUGCCGCCGCCGCUGCUGCUUCUGCUGCUGCUGCGGCCCCA
rno-novel-mir-1006	chr12:+:21769374:21769481	ACUCGGUGGGCAGCAUGGACAGUGUGGGUGGUGGGCCUGGAGGAGGUGGAGGAGGGCUCCUGGAGGACAGUAGCACCCGGAGACCCCCAGCUAAGCCGCGGAGACACC
rno-novel-mir-1007	chr12:+:21981120:21981229	CGCACUGUAGCGGAGGCGUCCGAGGCCUGACGUAGGUGAAGGGAGGAGAGGAAGGCGUGGUUCUCUAGAUGUUCCUCGCUGGUGGAAGGGAGGUCGCCUGAACGACCAGG
rno-novel-mir-1008	chr12:+:21981170:21981279	GAAGGCGUGGUUCUCUAGAUGUUCCUCGCUGGUGGAAGGGAGGUCGCCUGAACGACCAGGCCGUUUCAGGGGAAGAGGAAUUUGUACAGCCUCGAUGUUUUAGUGCUUGC
rno-novel-mir-1009	chr12:+:21981599:21981710	CGUGUUGCCCCUUCAACCCGCGCAAGCCCAAAAGGACGGUGCGCAGGCGCUCUCUAGGAGGGGCGGGGAUGGGGGAGGAAGGAGGCGGGGCAGGGAGGUUGUUGGGUUUAGA
rno-novel-mir-1010	chr12:+:21982085:21982193	GAAAAGGGUGUCAGCGCACGCGCAGUUGGUUCCUCGGCUUGUCCGGGUCUCGCGGGCAUCUUGUUUUGGUCUCGCGGGCGAGUGGAGCGCGCUUGGUGUGUUGCGGGAG
rno-novel-mir-1011	chr12:+:22021908:22022016	AGCUGGCCCGGAGCCAGGCCUGCCACAGCCGCAGCCGCAGCCGCAGCCGCAGCCUACAGUUGCAGCUGCUGCCGCCGCCGCUGCUGCUUCUGCUGCUGCUGCGGCCCCA
rno-novel-mir-1012	chr12:+:22029731:22029838	ACUCGGUGGGCAGCAUGGACAGUGUGGGUGGUGGGCCUGGAGGAGGUGGAGGAGGGCUCCUGGAGGACAGUAGCACCCGGAGACCCCCAGCUAAGCCGCGGAGACACC
rno-novel-mir-1013	chr12:+:22232657:22232765	GAGUGGGGCCUGAAGAAGAGGCGAGAUGGUCGGGGAGAGGGAAGGGACGCACUGUCUUCCCUAACACGCCUGACCAUGCCUCCUUUCCCAAGGGUACCUCUCCUGCUGC
rno-novel-mir-1014	chr12:+:22232657:22232766	GAGUGGGGCCUGAAGAAGAGGCGAGAUGGUCGGGGAGAGGGAAGGGACGCACUGUCUUCCCUAACACGCCUGACCAUGCCUCCUUUCCCAAGGGUACCUCUCCUGCUGCC
rno-novel-mir-1015	chr12:+:22232657:22232767	GAGUGGGGCCUGAAGAAGAGGCGAGAUGGUCGGGGAGAGGGAAGGGACGCACUGUCUUCCCUAACACGCCUGACCAUGCCUCCUUUCCCAAGGGUACCUCUCCUGCUGCCG
rno-novel-mir-1016	chr12:+:22232657:22232768	GAGUGGGGCCUGAAGAAGAGGCGAGAUGGUCGGGGAGAGGGAAGGGACGCACUGUCUUCCCUAACACGCCUGACCAUGCCUCCUUUCCCAAGGGUACCUCUCCUGCUGCCGC
rno-novel-mir-1017	chr12:+:22458208:22458315	GGGUGGCGGGAUCCGAAGGAGAGGACUGUGCCCGGGGGCUUCGGGGGUGGACAAGGGGGAACCCCUGGGGACAGUGAAACUGUCGGAGCGAUCGCCCUGCCCGGGAUG
rno-novel-mir-1018	chr12:+:22458373:22458480	CACUGGUCCUUGUUCAUCAUCACCGUGUCCACCCGCCGCCGGGCCCCAGGCCUCCUCUGACAGCACCAUGGGUGACAGUGAUGAUGAAUACGAUCGAAGACGCAGGGA
rno-novel-mir-1019	chr12:+:22477827:22477936	GAGGAUCAGGAGCAUCGCAGAGGGGAUUGAAGGGCGAGCCAGGACGUCUGUGUUCCGGGAGCUCCGGAGAUCCCCGCAGCAAAGGCAGGGGCGCUAUUUUGGGGGCAACA
rno-novel-mir-1020	chr12:+:22665434:22665541	UGGUUGGGAGAGAGGGGACUAGGGCUGAAUGGUGGCGGGACUGUCCGGAGCCUGGAGAAGCGCUCGGGAUUCUGGGUUCGGUCCUAGAGAUCCUCCCAAUCACCGCCG
rno-novel-mir-1021	chr12:+:22726836:22726945	GGAAAAAAGGCGUAACCCGAGGCCACCUAAAACCCGAGAUGCAGACGGCGAGACAAGGCAAGGAUUGUCGCGCGGGCGCGGGCUGGAGGGUGGGGAGGAGCCGAGGGUCU
rno-novel-mir-1022	chr12:+:22726895:22727002	AAGGAUUGUCGCGCGGGCGCGGGCUGGAGGGUGGGGAGGAGCCGAGGGUCUGGUCCCCGACACAGCCCGACUCACGCCUGAGGAACCGAAUUCCCCAGAGAGGGGAAG
rno-novel-mir-1023	chr12:+:22727711:22727820	UUGUGACUGCUUGUUUCAAGCCAGACACUGGGGAUGAGGGGGAUAUCUUGUCACUCCAAAACCUGAGUGCUAUGAGCAGUUGCACUCACCUCAGCUUCUGGAUUGGUUGC
rno-novel-mir-1024	chr12:+:23150980:23151087	UCCCUCAGGCUCUGGACUCCAUGGCUGAGGCGGUGGCGGCGGCGGCGGCGCCGUGAGGAAGGAGUCCGCGUCCGCGGUGGCUGAGGCGGCGGCCGGCUCCAGGCCGGG
rno-novel-mir-1025	chr12:+:23761234:23761341	CUCAGCGGCUGAGCCGUAGGGGCGUAACCGGAAGGGCGAGUUCUCUGCAGGGUGAGAAUAGGGCGCGGCCAAGGGAGGACUCGAGCGGUGCUUUCUAGUUUAUAACGG
rno-novel-mir-1026	chr12:+:23789612:23789719	UCCCGCGGUCGCAGCUCGUGCCGCCUCCUUCUCGUCCUCGCCUUAGCAGCUUGCUUCGUGGGUCGGUCCUUCCGACACACGAGCUCCAAGCCGCUCCUCUCUUUUCCU
rno-novel-mir-1027	chr12:+:23789637:23789748	UCCUUCUCGUCCUCGCCUUAGCAGCUUGCUUCGUGGGUCGGUCCUUCCGACACACGAGCUCCAAGCCGCUCCUCUCUUUUCCUAAAGCCCUUCAAGGCAGUCUUCGGUUUCC
rno-novel-mir-1028	chr12:+:23815533:23815642	GGGACUGUUGUGCAGGUCGUGCAAGUGGAGCUGUCUGCCUUUAGUUUAACUUAUUGCUAGACGGUAGGGUUCUAAGCAGAAAGACCGGAUGGAUGGCCCUCUCGUUCAGU
rno-novel-mir-1029	chr12:+:23961989:23962099	UUCUGCAAAAGCAUUACACACUCUUGACCACAAAGUCAUCUCUCCAGCACCUAAUUUUAAAAAUUAAUUAUUAGGUGCUGGAAAUGUGACUCAGUGGCUACAAGUAUUUAU
rno-novel-mir-1030	chr12:+:24238632:24238740	GGGAGAAAGGGAGAACCCGGCCAAGGAUCUGGAGGCGGCUGGCCCGCGGGGCUGGGGCUCCCGGUUUCCCGCCGCGCCAGCUGCCAGGGCUGCCCUGGGCCGGGCUCCC
rno-novel-mir-1031	chr12:+:24347924:24348033	UAAGAGAGGUGGUUCAGCCAUUAGAAGCACAUGCUGUUCCCAGACAGGUUUUGCCGUCAAGGGAUCCCAUAGCUUCUGACUGUUGGCUUACAGCCAAUUCUACUGGGUUC
rno-novel-mir-1032	chr12:+:24651289:24651396	CCGGAGCCCGGAGCGGAGCCGGAGCGGAGCCGGGGCGGAGCGGGGCCGAUCGGGCCGAGCCAGCAGCCGAGCUGGGGGCGCGGGCGGGCGGUAUGUACCGGGCCCGGG
rno-novel-mir-1033	chr12:+:24651339:24651446	CGGGCCGAGCCAGCAGCCGAGCUGGGGGCGCGGGCGGGCGGUAUGUACCGGGCCCGGGCGGCGCGGGCGGGGCCGGAGCCCGGCAGCCCGGGGCGCUUUGGGAUCCUC
rno-novel-mir-1034	chr12:+:25036660:25036772	CAUCAUCGCCGAAGCCGGAGCGGAGCGCUCGGCUCCGGCCCCGCGCUCCCCGCCUCCCGCCUUCUCGGGCCGGCGGCGGGCGAGCUCGCGGGCCCGGCCCCAGCUCUCCAGUG
rno-novel-mir-1035	chr12:+:2503939:2504052	AAAAAUAUGGUUUGGCCAAUACCAAAGAGGCUGACUGAGUUCUUGACCUCCUCUGGUAGUGGGUUAUUUGUUGAACCUCCUCCAGAUUCUUCCGCCUACUUCUGGUUGGGUUAC
rno-novel-mir-1036	chr12:+:25093146:25093253	CCUCGCUGGCCCGCUGGUUCCUCAAGGAGCGGAGACGGCAAAUGGCGGACUUCGAUACCUACGACGAUCGGGCCUACAGCAGCUUCGGCGGCGGUAGAGGGUGAGGCG
rno-novel-mir-1037	chr12:+:25304033:25304140	GGGGCGACAAUGCCCAGCUAAGCUGUGGGUGAGGCAGUCAGGUGCCUUUCCCACAGGAUUGGCUAUAAGGAUGUGGACACAAGCUGGUAAUCUCAGUUCUUGACAGGC
rno-novel-mir-1038	chr12:+:2534759:2534870	GAUGGAGGUGCAGGAAGGGCAUAGCCUCAUCCCCGCGGACCCCGGGGUGGGUACCCCCCUCUCUCCGCAGAGCGCGGCGAUGUGAGCUAUGAGUGCGCCGUGGACACUGUCA
rno-novel-mir-1039	chr12:+:25521498:25521609	CUCCUCCAGGCACUCGGACUAAGGGCAUACUACUGCCUGGUUCAAAUGAACUACUGUUAAGGUACUUUGUUCAUUUUGAACUAGUGCAGUAAGUUUUGCCCUGAGUGCAUGC
rno-novel-mir-1040	chr12:+:2579062:2579169	AGGGAGGCGGCACCCGCACCUCCCUCGGAGGCGCGCCUCUUUUCUCAGCACCCUCGGCACGCUCCCGGCUCUGGACGGAGAACGAGUGCGCGCAUCCUCCGCUCUCUC
rno-novel-mir-1041	chr12:+:2579112:2579219	CCCUCGGCACGCUCCCGGCUCUGGACGGAGAACGAGUGCGCGCAUCCUCCGCUCUCUCUACCCGAAGCUGGGGGGGCGGGGCCGCGGCCAAGCUCCCUAGGCACUGUG
rno-novel-mir-1042	chr12:+:2584945:2585056	GCUUCAGGCGAGCGUUGUGCAGCACCUGCUGAGCCGGACUCUGCUGCUGGCAGCCGCGGAAGGUGCAGCAGCGGGCAGCGAAGGUGGUUCAGGAGGCUCAGGGGGUGGUGGU
rno-novel-mir-1043	chr12:+:2625578:2625685	GGCGAGGCAUGGGUUUCUGUGGAGUCAGAAGGAAAGAGUCUAGGGCUCUGAUCUUGGUCUCCUUGGAGAGGAUGAGGGUGUAGGCCAGAUCCAGAAGACAGGAACCCA
rno-novel-mir-1044	chr12:+:27249682:27249793	GAUCAACAGUCUGGUCAUAUUCCCUGAUUGUUCCUCUCUGCUGCCUGUUCGCUGUUCAGAGGAGCCUCUUUGGAGGGGAUAGCUGUAGACUUCCCAGAGAAGUUUCCAGAAC
rno-novel-mir-1045	chr12:+:28074867:28074974	UUUUGUGUUGGCUUUGGGAUUCUCUUGUCUACCUGGAUAAUGGUCUGCCUUUGUGGCUGAGUCUUCCCGGCGUCAGUGGAUCACAGGCAGCCCGAGGCAUCAGCCUCC
rno-novel-mir-1046	chr12:+:28074917:28075024	UUGUGGCUGAGUCUUCCCGGCGUCAGUGGAUCACAGGCAGCCCGAGGCAUCAGCCUCCGGACUUAACAGCCUUCGGAUUCCUUGAGCCUAGGAGUUACUCUGGGCUGC
rno-novel-mir-1047	chr12:+:28162741:28162851	AUAUAAUGAAUAUAAAUACAUACAAAUAUGCAUACAUACAUGUCUACACACAUAUAUACAUAUAUAGACAUGUAUAGACAUGUAUGUAUGCAUGCAUGUAUACACACACAC
rno-novel-mir-1048	chr12:+:28720826:28720936	UGCACAGGAGUUGGCUGUUGUGUGCACAGGAGUUGGCUGUUGUGUGCACAGGAGUUGGCUGUUGUGUGCACAGGAGUUGGCUGCUGCAUGCAUGUACUUGAAUUCACCGCG
rno-novel-mir-1049	chr12:+:28730847:28730954	CAGUGGGUGGGUAUUUGUGUUUCUGGAGGAAGAGGAGUUCUGUGACUUUGGGUCUGUCUUGCUUUUUAGAAUUCCAAAGUUCUCUCAUUUAUUUUUCCAUCCCUACUG
rno-novel-mir-1050	chr12:+:28763244:28763355	ACCCCAGUAUAAUUUAGGGUUUUUUUUUUCAUUUUUCCUGUUCUAUGUGUGUGCAUGGACACAUGAGCCACGUGGUUUGGGCUAACUUGACACAAACCUAGACAUAUCUGGG
rno-novel-mir-1051	chr12:+:30163732:30163843	UGCCAGAAGUCUUAAGCAUUUACAAGGCAUGCGAGUUUGACUAAAGUCCCACAUUGUGUGACACGGGCACUCUAGCAACUACUGCGCAUGCUCCCCAAAUGCUUCCAGUCCC
rno-novel-mir-1052	chr12:+:30514088:30514197	UCGCUGGCCCUUCCAACCCGGUUUUGCAGAGCUGAGAUCUGGCUUCUCCAGUUGGAAGCACACAUGCCAAACUGCUCUGGAGACGCCGGAGGCAUCGGCAGAUCCCAGAC
rno-novel-mir-1053	chr12:+:30755651:30755758	UAACUCUGCUGCCAGCAAUGCUGACCUGCAAUGGACACCUCGCGCCUUACGCAGAGGGCUUGUGGGUAGACUGGAGAGGCAGAGACGGAGAAGAGGAAACAGAUGCAC
rno-novel-mir-1054	chr12:+:31393063:31393170	AAGGGCCCCAGCUCCGCCUCCCUUCCUGCCCGGCUUCUGACCACCGCUCUGUGAGAGACACCGGCAGGGAAGGGACAGAGCCAUCUUGGGAUGCGUGUGUGUGCAUGC
rno-novel-mir-1055	chr12:+:31393903:31394010	UGCCACCAAUGGAUCCUUGUCAGAGUGAAGGGAAGGGCUGCUGCCUUCUCUUGCCCGUACUGUGUCAGCGAUGGCGAUGACGGUGGCGCUGUGGAUCUCCCGGUCCUC
rno-novel-mir-1056	chr12:+:31435553:31435664	AGAGAGCUUCCAUGAGGAGCCCUAAGGAGGCAGGAGGAUCCCAAGAAGUAGCGAGGGUGGGAGAGGGGGAGACUCCGCCCUAUCUUGGGCUCUAGCUCUUUUCCUCUUCUCG
rno-novel-mir-1057	chr12:+:31950877:31950985	UGGGGCGGUUGCUUAGGGGUGGGGCAGUUACUAAGGGGUGGGGCGGUUGCUAAGGGGUAGGGGUGGCCGGUAGAGAGCCCCCUGGAGAGUGAUAAUGAGCUUCUUGAGG
rno-novel-mir-1058	chr12:+:32753836:32753943	GGGAACCAGCCAUGGAGGGCGAGCGGGCGCCGCUGUUAGGUUCGCGGCGUGCGGCGGCAGCAGCUGGGGUGUUUGCGGGGCGUCGUGCGGCGUGCGGGGCGGUACUGU
rno-novel-mir-1059	chr12:+:33715261:33715372	AUUUCAACACAAUUGUGUUCUGCUUAAAACAACAAACGCUAAGGACAGUGAGAAAGCCACAGGCUCGACUUCCUGCUCUUCCGUUUGUGUUUUUGUUGCCUGACACAUUGGG
rno-novel-mir-1060	chr12:+:36305613:36305720	UGUUCGAAGGGUUCAGCCAGCGUGACUGAAAGGGGGGCUGAUUAUCUCCUCGCUGCCUUUGCUCAGCCCGUGGUUCCAGUUGCCUGGAAACUCACAGAGUGUGUUCAU
rno-novel-mir-1061	chr12:+:36733011:36733121	CUUGCCUUGGAGUCCACACUGACAUGGGGCUGGAUUUGACCUGCCAGUUCUGGCUUGCCACCUCUACUGGAGCCUCUGCCUGUUGUUUCUCGCUGUGUGGGGACAGUGGGG
rno-novel-mir-1062	chr12:+:36774669:36774780	UGGAUCUGAGGGUCCAGGGUUCAGGUCCCUGUUCGGGCGCCACUUGUCCCCGCCAGCGGGGACCCAGUUAUUCAGGGUCCCGAAGGGGCGCUACCCUUGGGCCUAAAUGGGG
rno-novel-mir-1063	chr12:+:36874136:36874243	UUGUCCCUGUUUGGAAAUUUACCGCUGUUUCUUUGGGGUGCCAGGGGAGCCUGCGGUCUUAAAGUCCAGACGUGGGGGUGGGAAUGAGUGGCCAGACCUAGCCUCUUC
rno-novel-mir-1064	chr12:+:37214305:37214416	UUCCUGGGAGCUCAAAGGAUUGACAGGUAGCAGACCAGCCAUGAGGACAAAGGAGUUAAAAUUUUGGAUCCUUUGGAUCCUCAUGGUUGUGAGCUACCAUGUCGUCCCCUGC
rno-novel-mir-1065	chr12:+:37444111:37444218	GAGAAGCUCGACACGCUGUCAGGCGGUGCUUUGCUGCUGGCGGGGUUGUGGUCCGCGUCGCGAGGAAGCCAUGGAGGACGGUGGUGAGUAUCUAGCCAGAGCGGCGGG
rno-novel-mir-1066	chr12:+:37832179:37832286	UGCGGGCUGGCUGGGGACGGCUCUCUGAGACCUGCAUGUGGGAAGCCAGCAGAGUCUGCAGGAUGGGGCCGCUGAGCGGGGCUCCAGCCAGCACCUGCUGCGUGAGGC
rno-novel-mir-1067	chr12:+:37834560:37834667	CCAGACUACGCCCAGGCAGGACAGGCAGCUCUACCCCUGUUGAGGGAUGCUGGGCUCAGGAUAGUAUCUAUCUGGGAGGUUGAAACUUUGUCCCUACCUAGUGUACCC
rno-novel-mir-1068	chr12:+:37891859:37891972	GCCUGCUUUCUAGAUCGGGGGGGGGUGGGGUGGGGGGGUAUUGGGUCAAGCUGAGUUUACCUGCCCUCUCCUGACCCAGCCCCUUCCCCCCAGCCUCAGUCCCUAUGGCCAUGA
rno-novel-mir-1069	chr12:+:37891860:37891970	CCUGCUUUCUAGAUCGGGGGGGGGUGGGGUGGGGGGGUAUUGGGUCAAGCUGAGUUUACCUGCCCUCUCCUGACCCAGCCCCUUCCCCCCAGCCUCAGUCCCUAUGGCCAU
rno-novel-mir-1070	chr12:+:37891860:37891971	CCUGCUUUCUAGAUCGGGGGGGGGUGGGGUGGGGGGGUAUUGGGUCAAGCUGAGUUUACCUGCCCUCUCCUGACCCAGCCCCUUCCCCCCAGCCUCAGUCCCUAUGGCCAUG
rno-novel-mir-1071	chr12:+:38873093:38873200	AGCCGAGGGCUGGGUCGGGUUGGAGCCAAAGCUGAAGCCGCCCGGCCGUUCACUACUGCUAUGGCUAAUGGCGGCCGGCUUUCCUCCUUCCUUCCGCCAUCCUGCUUU
rno-novel-mir-1072	chr12:+:38875908:38876015	UGUUCCCGGGCUCGAUGAGCUGUUCUUUGGUUGGGUCAUGAUUUUAAGGGCCACCCACCAAUGGCCCCAAGAGAAGAAAUGUCUCACCCAAGGUUAUGAGGCCACGAC
rno-novel-mir-1073	chr12:+:39209179:39209293	AGCCAUGGCGUAAGGCGGCUCGUGGGCGCGGCGCGUGGCAGGCCUUGAAGGCCUGUCAUUGCCAGCGUCCACGAGAGCCAAUACUUCAAUCCAAUGAUGACCAACGGGGUAGUGC
rno-novel-mir-1074	chr12:+:39790956:39791063	GCCUCGCGAGCCCUUUCCCGUGGUGCCUAGCGCUCGGCUGUGACUGUUGCCCGGCAACAGACAGGCCUAGCUCUCUGGCGCGGGAUAGUAUGCUAGUCCAUGGGGUCG
rno-novel-mir-1075	chr12:+:39791025:39791133	GCUCUCUGGCGCGGGAUAGUAUGCUAGUCCAUGGGGUCGCGGUGUCUUCCGCCGCUCCUGCUGGUGCUCCUAAACUGCUGCACCUCUUCGAGCACCCAGGUCGUUGCCA
rno-novel-mir-1076	chr12:+:39882871:39882978	AUUUCGCGCUAGGAACGCGGAUGUUAGAGGCUGCUGUGCGCUCCAGGUUUCAGCACAUUCAGCGGCUGCUUGCCUCUAGCUUCCUCGACUCCCCAGGGGCACCCCUUC
rno-novel-mir-1077	chr12:+:40256853:40256963	UGUUAAUCCCUACUCUGCCCAGAGCCUCUGCCCUGAACACUGAUCUAUUCAUCAUGGAGUCAGGGCCAUGGGCUCAGUGUUGGGGUCAUGUUGAAGGGCAGUGUGGUAGGC
rno-novel-mir-1078	chr12:+:40582433:40582542	UCCGGAAAAAAAAGAAAAAAAGUUGUAUAUCUAUCUGGAUCCUGCUGAUCCAGAUAGAUAUACAACUCUCAGCUCCCUCUCCAGCACAGAUCUGCCUGUGUGCUGCCAUG
rno-novel-mir-1079	chr12:+:40695489:40695596	GGCCAAUGGGCGUGCCCCUCGGCGACGGUGGGAAGCGGCUGGGCAGCGAGGCCGUUGUUGGCUCGGGGCGGCCGAGGCGACUGUGGCGGUGGCGUUCCCGCUGGGCUC
rno-novel-mir-1080	chr12:+:40695539:40695646	GCCGUUGUUGGCUCGGGGCGGCCGAGGCGACUGUGGCGGUGGCGUUCCCGCUGGGCUCUGAGGUGAACGCGGGUGGCGGGGUGGGGUGGGGUGGGGUGGGGUGGGGUG
rno-novel-mir-1081	chr12:+:40705834:40705946	GCUGGUGGUGCGGUGUAACCGCUUUUCCUUUAUGCUGUAGUACUCAGGCUCAAGUGACCUUUCUACCUCCGUGUCCCAAGCAACUGGGAUUGUGGGCACACAGCACAGCACUG
rno-novel-mir-1082	chr12:+:40958243:40958350	UGAGAUAAGAGUUGGAAGCAAGCAAACCAAGGGGGGGUGGCACAAGCUUGUCCUCCUGGGAGGUGCAGGCAGGUUGGGAGUUCAAGGUCAGCCUCAGACUCUAUAAAA
rno-novel-mir-1083	chr12:+:41149122:41149234	UCCUGAUGGUGAUCAAAUAACAAUAUUUAGAGCUUUAAUCGGGUCAGAACUCUCUUGAUCCACCACAAAUCAAGAGGACUGUACCGCUGAGCCUGGAGUCAGGCCAUCUUCCU
rno-novel-mir-1084	chr12:+:41236136:41236246	CAUCAAACUCCACCUCCUGCUGGAGCUGGGGCGAGCUCAGCGUGAAGCUCAGAGACUUGGAGCUGGGCUGCUCUGAGCUCUGGACCUCAAGCUUCACUUGUAACGUUUUCU
rno-novel-mir-1085	chr12:+:41507742:41507849	AGGAGUCGGCGGAUGCGAGGGCUGGCGCAGCUGCCGCUGUGGCAGCGGUGAGGCGGCGGUGGCGGCUGCUGAGGCUCCGCUGUGGGGAUAUUGGCGGCAGCAGCUGCG
rno-novel-mir-1086	chr12:+:42337340:42337452	UCCUGAUGGUGAUCAAAUAACAAUAUUUAGAGCUUUAAUCGGGUCAGAACUCUCUUGAUCCACCACAAAUCAAGAGGACUGUACCGCUGAGCCUGGAGUCAGGCCAUCUUCCU
rno-novel-mir-1087	chr12:+:42918210:42918317	CGGGUCUCCCAGUCCACUUUGGGGAUAGACGUAACAAAACAGGCUACCCUGGGCUCAGCCCUCAGGGCAUGUGCGAGCUGAAGGGUGCCCAGCCCUGUUCCCAGAGAG
rno-novel-mir-1088	chr12:+:43495692:43495799	UGUUAGGGUUCCUGGUUCCACCCCGGGUUUCGGCACCAACGUUAGGGUUUUGAAUCUCGGCCCCAUGCCCGGACAGAAUACACCCAAGCACCAUGGUUCCGUGUGGAG
rno-novel-mir-1089	chr12:+:44007465:44007579	AAGCGCUCUACCACUGAGCUAAAUCCCCAACCCCCUGCAACUGGUUUUUAUCAAAGACAUUGCUUUGCCUGAGACACUGUCAGCAUUGUGGAGGGGUUGGAGCUGCAGGGGGUGC
rno-novel-mir-1090	chr12:+:44101636:44101747	UUAUGCGUUUAGAGACGAGUUAUCGCUCACCCUGGACUGAGCAACAACACAGCAAGUCCAGGGUGAGCGAUUGUUGUUGCUCAGGCUAACCUCAGGCUAACCUCAGGCUGCC
rno-novel-mir-1091	chr12:+:45030731:45030842	GCGCUGCAGAGCCCGCAGCCCCGGGGACCCCACAGUACAGUCAAGUCGUAUAAAGCAUGUGCUGUGGGGUGUCCCCCCACGCCCAUCCUUCCUUCCCACCCUCUCAUAGGGA
rno-novel-mir-1092	chr12:+:46702513:46702620	CUGGAGCCCCUGUACGGCAGGCGGCUCAGCCUACGGCUGUGAGGCCUAAGAACUGGGUGUACCCAAGCCCUGUUGAGGCCGUCCUGCACCCCAGGGAAGGUCCUGUCU
rno-novel-mir-1093	chr12:+:46789761:46789868	CAAGGGGAGGCCUGGCGCCCCCGGGCGGGAGGGCGGUCGCAGGUCGCGCGCUGCAGCCCGGGGACGCUGGCUGUCCUCAGCCCGGCAUCCUCGGCGAUUCCCGGUCCA
rno-novel-mir-1094	chr12:+:47046172:47046279	CCAGUCUCCCAAGGGGUGCGAGUGGAAGGUCCGGGCGGUGCGACCCCAGCGCCGCCUCGGCUGGCAGGGCACUGAGCCCGCUUGGGCGUGCGACUGUCCUUCUGUGAG
rno-novel-mir-1095	chr12:+:47153271:47153378	GGCAGAGAGCAUCCAGCAGGCGCUCAGGAUACAGUAACCGUUAGGACUGGCAACACUCGCUGCUCUCUUCUGCUGGGGACCCUCCUGGCGCUCCCCUUACCUCUCCGC
rno-novel-mir-1096	chr12:+:47202805:47202916	GGGCAGGCCUGGGCGAUGGCGUCAUCAUCAGGGGCCUACCGGGCAGGCCUGGGUAAUGGCGUCAUCAUCAGGGGCCUACCGGGCAGGCCUAGGUGAUGGCGUCAUCAUCAGG
rno-novel-mir-1097	chr12:+:47230791:47230898	AGAAGAGGGAGAACAGCUGCCUCUCGUUGCCUUGUUUGCCUGGGUCUCUGGGGAGGGAGGGGUCCUGCUUUCUCACCCCAACCCAUCCCUUUGGUGACUCAGAGUCGC
rno-novel-mir-1098	chr12:+:47230841:47230948	GGGAGGGAGGGGUCCUGCUUUCUCACCCCAACCCAUCCCUUUGGUGACUCAGAGUCGCAGAAGGAAACCCUGACUCCUGGGGCCAUUUCCUAAUGGUACUGUAAGCCA
rno-novel-mir-1099	chr12:+:4725579:4725692	CUUUUGCAACUACAGGGAGCUAUGAGGAGGACCACAGACCAUGCCGUGGUGAGUGUAGUCCUCCUCGUAGCUCCCCAGGCCAGAAGGAGCAGAUCUGCUGAUCUAUCCAUAUCU
rno-novel-mir-1100	chr12:+:47413994:47414105	UGCAGAAGCUCAGGUUGGACUUUGUCCCUAACUUCCCUCCUAGCCCUGAUUGGCACUCAGGGAAGGGAGGAGGGGGUGGGGCUCCAAGAGGCCCCCAUAAUGGCUAGGGGAG
rno-novel-mir-1101	chr12:+:47551868:47551975	AGCUUUUAGGGGCGGGGCUUGCGGCGGAAGCGGCGUCCGCGCGCUCCGUGCGCUGCGGGCUGCAGAGAUGCUGCGCGCGGUGUGGCUGCGGUUGUGUGCCGCGCUCUG
rno-novel-mir-1102	chr12:+:47557148:47557256	CUGAAGUUGGUGGUGUAAAAUACUGAAAUGUAGGAGGCAUGGCAAGACCGUCCUCCCCAGCAGGACAUGGUCAGCCCGCUUCCAGACCAGUCUGUGUUGACAGGCUACU
rno-novel-mir-1103	chr12:+:48106031:48106138	GGCUCAGCCAAGGGAGGAACAGAAGACACAGUGUGGCGUUGAGAACGAGGCUGGAGCACACAGUGUCCAUGUGCCUGUUGUGUCCCUGUGCCCUCCCUUCCUAGCCUC
rno-novel-mir-1104	chr12:+:48373307:48373417	CUUUGUUCAAAAAUGCCGUGUUCCAGAGGGGAAAACUGAGGCUUGGAGAGGUAAGGUUCUGAACCUGCCAUCCCCUUCUGACUACACUGUACCCCUAGGGGUACAGGGGUA
rno-novel-mir-1105	chr12:+:48814628:48814735	CUUCUACUUGAGUCUGGGAGUCACUGUGGGGAGACAGCAGGAUCCAGCCUGGAUGCUCCAACCCCCAGCUAUUGUUCACACUGUUUUCCACAGAGAGUCUUAGCUCUG
rno-novel-mir-1106	chr12:+:48915060:48915169	GCGGAGCCAGGGCUGGGGCUGAGCGAGACUGAGGCCGGGGAAUGAGCUGGGGCUGCGCGGGCGCCCGCACUCCCGGCCCUGCUGGAGCAGUCUGCAGCCCGAGCUCCCGC
rno-novel-mir-1107	chr12:+:49377313:49377424	AUCCAACUCCAGAGUGAGCAUUUGGGAGGUGAGGGUUGGGAGUGGUGCUCGGGGGUCAGUGUCCCCUUCUUCCUCCUCCUGCCGCCCACAGCCAGAGCUACUGGACCUGUAC
rno-novel-mir-1108	chr12:+:49467669:49467779	GCUGGGUCACAUGUCACCUAUGCAUGGUAGUGGGGAACCAGUNNGCAGACGAGAGGCUCCCACUGAAACUCUCCUCUGUGUUCUCUAUCCCAGCUGCCUCUGCAGAAUCUG
rno-novel-mir-1109	chr12:+:50145644:50145756	UCACUCCUGCCAUGCACAGCUGUCACUCACAAGAGAGACAAAGCGGCUCCCUACACAAGACUCCGCAUGGACGAACGCUGUUGUUUCUCUUAAGUAAAAGCCAGGAGUGGGAU
rno-novel-mir-1110	chr12:+:50269727:50269839	CCUGAUGCGCGUACCCGGCGCGCGGCGGGGCGGGGCGCGCGGAGCCCCCCGCGGGCACGCGCGGCAGGUGCACGCGCCGGGGGUCCCGCGAGUCCCGCCCCGCCGCCCCCUCC
rno-novel-mir-1111	chr12:+:50269727:50269840	CCUGAUGCGCGUACCCGGCGCGCGGCGGGGCGGGGCGCGCGGAGCCCCCCGCGGGCACGCGCGGCAGGUGCACGCGCCGGGGGUCCCGCGAGUCCCGCCCCGCCGCCCCCUCCC
rno-novel-mir-1112	chr12:+:50335373:50335483	GAUGAGCAUCUUUGAGCAGAUCCCCCUCAGUCCUCCUUUGAUUUGUCCCCCACUGGGUUAACCCUUAAGGGAGGAGAUGAAGGCAUGGCUCCACUUAAAGCUUCGGUUUUC
rno-novel-mir-1113	chr12:+:50458653:50458760	AAAGCCCACAAAGCAGAGUCAGCCAUUUCCCAUGUGAAGCCUGAGGAGAGGGCACCUGGAAGUCUGUAAAAGGGCCUUCCUCUCAGCCUGAGAAGAAAUGGCCAAUGA
rno-novel-mir-1114	chr12:+:50458703:50458810	GGCACCUGGAAGUCUGUAAAAGGGCCUUCCUCUCAGCCUGAGAAGAAAUGGCCAAUGACCAGGAAGAAGCUUCUCCACAUAGGUGGUCAGCCAGCCAGACCUCUCCCA
rno-novel-mir-1115	chr12:+:51908105:51908213	CGCCUCCGCGCAGUGCGGCUGCGCCGGCGUCUCGGGCUCCGAGGCCGGGGUGCCGCUGAUCUUUUGUUUCCCUGCGGGGCUCCGAGCCACAUCGUCUGUUAGGACCGAG
rno-novel-mir-1116	chr12:+:52014315:52014425	CGGCUACAGCGAAUCUGCAACCAUCCUGGACUAGUGGAGCCACGGGUACCAGGCUCCUCCUAUGCAGCAGGCUCUCUGCAGUAUAAGUCAGCCUCUCUAAUUCUCAGAGUU
rno-novel-mir-1117	chr12:+:52364104:52364211	CCCACAGGACCUGGCCCGGCCCCUCUUCUCCAGCACAGGUGAGACCAAGGGUAGCUGGAAUCAGGGGUCUGAGUGGGGCCAAAAUAUCUGUGGGGAUGAGAAACACUG
rno-novel-mir-1118	chr12:+:5728427:5728534	GAUCAGGAACAGAGGUAAGCCAGCGCUUCUUUCUGUUCUUUCUGGUGGUCCCUUUGUCACUUGAGACUUAAUGGCGGGCGGGCGGGCGGGCGGGAGNNNNNNNNNNNN
rno-novel-mir-1119	chr12:+:6386237:6386348	CCUCUAGCGGCGCCACCCUCGGCCCGCGCCCUCGCCAUCUCCGCCUCCUUCCGCCGGGGCACGCGGGCUUGUGGGGAGGGCGCGGCCGGGUCCAGAGCCAGCGCCGCGCAAC
rno-novel-mir-1120	chr12:+:6386287:6386398	CCGCCGGGGCACGCGGGCUUGUGGGGAGGGCGCGGCCGGGUCCAGAGCCAGCGCCGCGCAACUGCUAGAAACUUUGCAAGAGGCCGCAGCCUUGCCCGCCACAUGCGCGCCG
rno-novel-mir-1121	chr12:+:6868470:6868578	AAUAAUUCUUUUUUGGGGUUGGGGGUCUAGCUCAGUGGUAGAGCGCUUGCCUAGGAAGCGCAAGGCCCUGGGUUCGGUCCCCAGCUCCAAAAAAAAGAACCAAAAAAAA
rno-novel-mir-1122	chr12:+:6957290:6957397	UCCGAUCUCUGGCGCGUAGGCCCAAUGUUGGGCCUCACUGGCAGGCCAUCAUGGCGGCCGGCACGAUGGGCUCCCAUAGUUCGUUCUUUGGGCCCUCGCGCCACCGUA
rno-novel-mir-1123	chr12:+:7082549:7082657	GGCGACUCUGUGCCUCGCGGAGGGUAAGUGUGGGGCGGCGCAGCGGCGGGGAAAGCGCCUCAGGCAGCCUCGUAGCCCGCGCGGCGACCGGAUCCCCGCGGCCCGAAGC
rno-novel-mir-1124	chr12:+:7866223:7866332	AGCUCGGCUGUGCGGCCCCGCGGCGCGCGCUGAGCUUCUCGGCGGCCCCGGCCGCUCUCAGCUCGGCGCUCGAUGUGUAGCCACAUAGUUAUCUGUACACUUCGUCGCCG
rno-novel-mir-1125	chr12:+:8047103:8047211	ACAAUGUUCCCUUCGAUCAAAGAGGGAGCGGGGCUUAUAAAGGUAGAUUCACAAAUUAAACCUGGGUGCCAUCCUGUGUGUGUGACUGUCACCGAGGAAGGCUCACUGU
rno-novel-mir-1126	chr12:+:8759526:8759634	GUCCGGCCAGGAAGGAAAAGAGGGCGUGGGAGGAGAGGGAGUCGCGUUGGGCCGGGGCUCCCACGCUUGCUAUCCCCGGGGAGCGAGGGCCAAGGGCGCAGCUAGAGUG
rno-novel-mir-1127	chr12:+:8897362:8897470	GGAUUCUGGCCCAACAAAGGCAUGCAUACUCUGGGUCUUUGGAUUUAGGGCAGAUCUGUGGUCAGCAGAACGGCUCAGGUCUCAGAACCCUGUAACUGCAGCAGAUCUC
rno-novel-mir-1128	chr12:+:8910441:8910549	GGAUUCUGGCCCAACAAAGGCAUGCAUACUCUGGGUCUUUGGAUUUAGGGCAGAUCUGUGGUCAGCAGAACGGCUCAGGUCUCAGAACCCUGUAACUGCAGCAGAUCUC
rno-novel-mir-1129	chr12:+:9034352:9034461	UCGGCUGCGCUUCAGCGAGGUCCUCGGGAGGCUCGGAGCGCGGUGGCGGACACUCCCCGGAGGUAGUGGUGGUAGUGGUGGCAGCAGCUCCGAGCGGGCUCCGGGACUCA
rno-novel-mir-1130	chr12:+:9080085:9080197	UUUGAGGAUAUCAGUGAAUUCCUGAAGACAAGAGCAGAGUGGGCAGUGAGAAGUGUUUCUAGGAAAAUCUGAUGCUCGCUCUGGUUGCCUGGGGGAGUUACAGAGGAAAUAGA
rno-novel-mir-1131	chr12:+:9865138:9865248	ACUUUCUCUUUGUGUCACUGAGUCCUUAGUGUUUGGGGGUAUUUUUAGCUGUGGGAUUUCCACUUUUCCCUCAGCCUGAUUUAACCUCCAUAAUGGCAGAGACUGAAAAAU
rno-novel-mir-1132	chr12:-:10209135:10209243	GGGGGGGGGAACAACCUUUUUUUUUUCCCCCUUUUUUUUUUUUUCCCCCCUUUUUUGGGGUUUUUUCAAGGGGGUGGGGAAAAAAAAAAAAAAACCCCAAAAUAAUAUU
rno-novel-mir-1133	chr12:-:10209135:10209245	UUGGGGGGGGGAACAACCUUUUUUUUUUCCCCCUUUUUUUUUUUUUCCCCCCUUUUUUGGGGUUUUUUCAAGGGGGUGGGGAAAAAAAAAAAAAAACCCCAAAAUAAUAUU
rno-novel-mir-1134	chr12:-:10209136:10209245	UUGGGGGGGGGAACAACCUUUUUUUUUUCCCCCUUUUUUUUUUUUUCCCCCCUUUUUUGGGGUUUUUUCAAGGGGGUGGGGAAAAAAAAAAAAAAACCCCAAAAUAAUAU
rno-novel-mir-1135	chr12:-:10655638:10655748	UUAUAAAAGAGUUAGCUAGGGGGCGGGGGAAGCUCAUCAGCGGGACCACGCGCUGAGUGCUCGUCACUCCAUCGGUCCCUGGGAAGGUCUGAGACUGGGGCCUCCCGCGGC
rno-novel-mir-1136	chr12:-:11078557:11078667	UUAUGUGUGAGUCUGAGUAGUGAGUGAGAUUAUCUGAGACAGGAUGAUGGUUGUCUCAGAUAGAUCCUUACUUAUAUCUUUUUUUAAAAUUUAUUUUAAAAGUUUGUUAAA
rno-novel-mir-1137	chr12:-:11144609:11144716	CCCGGGGAACCGUUGUCGCGUCUCCGUGGGAGCGACGGCUUGUUUGGCCCGCGCGGCGGACGUGCAGGAGGCGCCGCGUGCGGGCUGACGGCUGUUCCCGGAGCUGGG
rno-novel-mir-1138	chr12:-:11191710:11191817	AGAAAUUCGGCCGCGCGCAAAGGCUGCUGGGAAGGGCGCCGCACCCCUGAGGGGGCUGGGAGCAGAGACUCAUGGGAAGUACGUCGCCACUUGAACAUUUGGGACCUG
rno-novel-mir-1139	chr12:-:11627438:11627545	AGCGUGGAGCGGCAGCAGCAGCGUCGGCGGCGAGAGUUCGUCGGGGACUCGGGCCCGGAUGCUGGAGGCUAGUCCGCAGGUCCCGGUAAGCGCGGGGAGGGCGGACGA
rno-novel-mir-1140	chr12:-:11728917:11729027	UUAUGUGUGAGUCUGAGUAGUGAGUGAGAUUAUCUGAGACAGGAUGAUGGUUGUCUCAGAUAGAUCCUUACUUAUAUCUUUUUUUAAAAUUUAUUUUAAAAGUUUGUUAAA
rno-novel-mir-1141	chr12:-:1237656:1237764	GAGCGCUGUAUGCGCCUCUCCGGAGAUCACUGAGCGAGCAGCUGCGGGACUCCAGCGCCAGAGCCUGGGAUCUGCUGUGGAGGAACGUCCGUGAGAGGCGGCUGGCAGG
rno-novel-mir-1142	chr12:-:12738540:12738647	UCAAAAGCAGCCAAUGGGUGGCCCAGGAGACGCGUCUCCGUGAGAGCGGCGCGCGAAGUCUCCCGGGGAGACUGAGACUGGAGGAGUGCUGCUUCCAUGGAACCAACU
rno-novel-mir-1143	chr12:-:12815881:12815990	GGGAAGAUGUUGGCUGCUGCAUACAAGGCUCUGAGUGACCACCAUGUCUAUCUGGAAGGCACACUGCCGAAGCCAAACGUGGUCACCCCAGGCCAUGCUCGCACCCAGAA
rno-novel-mir-1144	chr12:-:12815883:12815990	GGGAAGAUGUUGGCUGCUGCAUACAAGGCUCUGAGUGACCACCAUGUCUAUCUGGAAGGCACACUGCCGAAGCCAAACGUGGUCACCCCAGGCCAUGCUCGCACCCAG
rno-novel-mir-1145	chr12:-:12885779:12885889	ACCCCACCAUGGUUGCAGACAUGUGCUACGUGCUGUCCCCACCGUGGUUGCAGACAUGUGCUACGUGCUGUCCCCACCGUGGUUGCAGACAUGUGCUAUGUGCUGUCCCCA
rno-novel-mir-1146	chr12:-:13122134:13122241	CCGCCCAGGGGGCUGCUGAGGUAAGUCUCCUGCAGGCCCAGCCAACAGCGGCUUGUCUCUCAUUUACAUACCGUAAUUAUAUCUCCUUCUCAGGAGAUAUAUUUUUUC
rno-novel-mir-1147	chr12:-:13715578:13715685	CCUUUUGCUUUUUUUUUUUUUUUUUUUUUUUUUCUUCUUUUUUUUGCGAGCGAGAGAGAAAGCGAGAUUGAGGAAGAGGAUGAAGAGUUUGGCGAUGGGUGCUGGUUC
rno-novel-mir-1148	chr12:-:13805365:13805474	CACCAACCCCCUCAUCCCUCUCGGGAUCCAGAAUGUUUUUCUUAUUUUAAUACAGCUCAAGAAAAAAUAUGUAUCUUGAGAGGAUCGGGGUGGGGGAUUGUGCAAAAGGC
rno-novel-mir-1149	chr12:-:13807032:13807139	UCCCUGUCCCCCUAGCAGUCGCGGUCGGGUGGGGUGGGCAAGCAGGCCACAAGGACUUUUUUUUUCUUUUGCCCCAGCCUGCGGGUCCCCUCCCUGAAACGCGGUGUA
rno-novel-mir-1150	chr12:-:13853313:13853420	CCCUCACUACGCUGCAUGACCGCUUGUGGUGUGGCUGGUUCACCACCCGACUACCAGCACCAGAGCGAACACAAUGCGUGCCUGCUCAGGUUCCAAGCAGGCCACCCA
rno-novel-mir-1151	chr12:-:14175873:14175980	AUUUCGGUCGCCGGUGGGCUUGGGGCUGUGGCGGCAUGUUCUCGGCGGGCGCGGAGAGUCUGCUGCACCAGGCCAGGUCUGCGGAUCUGGGGACGGGGCCACGGGGCG
rno-novel-mir-1152	chr12:-:14244482:14244592	GAGGACAGCGGCGCCCGCGCCCUGCUGGCGCUGCGCUCGGCUCCCUGCAGCCCCGUGCUAUGUGCCGCGGCCGCGGCCGCCGCCUUCCCGGCCACAGCGUCCCCGCCGCCG
rno-novel-mir-1153	chr12:-:15658146:15658255	GUUCUCAUCCCACCAGGGGCUCAUUUACUAAAUCCUCCCAACCCAUGAGUUGUGGUCUCACUGGGAUAAAAAUGGCUUCCUGGUGUCUCUCCAGACACUCAGCUGUUUUA
rno-novel-mir-1154	chr12:-:16001052:16001159	GGCUGCUUUGGCUGCCAGGAGUACUUCCUCCUGUAGCUUCAGCCUCUGUGUGAAAUGUGGUCUUGUGAAGACUGGCCGUGCAGGGUGGAAAAACUGAGCUAGUAGCCG
rno-novel-mir-1155	chr12:-:16121307:16121417	AGGGGUGGCUACCCUGGGGCAGAGCUGGGCCGGGCAGGGGGUAAGGUCUGAGGCCUGUGCAGUCCAGGCCUACUCACGGCUUCCUGUCCACACACAGGCAAUGUGGUACUC
rno-novel-mir-1156	chr12:-:17474863:17474973	AAAAACACUUUCCUUCAUGCCUCAGGCAUUUCAGAGGUCUGGGCCAGAGGGAGUGUUAUCCAGAAUUGAGUAUGGACUCGUUCUGAGCCAGACCAGCUGCCUCCCUGUGCU
rno-novel-mir-1157	chr12:-:17485986:17486093	ACCGCGCCUGCGACAGCGUCAGCUCUGCGCGGAACGCCGGCCCAUCCGCCGCCGCCGCCGCCGCCGCCGCAUGGCAGAGCAGGAGGGCGCCCGCAACGGCGCCCGCAA
rno-novel-mir-1158	chr12:-:17486036:17486143	CGUAGAAGGAGUGCGGCAGCCGCAGGGACGGAAGCCGCGAGGCGCCGCCGACCGCGCCUGCGACAGCGUCAGCUCUGCGCGGAACGCCGGCCCAUCCGCCGCCGCCGC
rno-novel-mir-1159	chr12:-:1755480:1755587	CAUCCUUCUCUGCCUUGUACAUAUGUGUACGGGGACAUGUGUUGGGUUUAUGUGCGCGCGCGUGUGUGUGUGUGUGUGUGUGGGGCAGAUGUUAGGUAGCAAGGAGUU
rno-novel-mir-1160	chr12:-:19335963:19336070	GCCAUCUGCACGCACCGCGUCGCCUACUCCCUGCGGCUCCGCGUAGCCGCGCAGCAGAACCACCACCGAGUAGGAACCGCUGGACGCCAGCAGAGGGGUCUCGCCGUG
rno-novel-mir-1161	chr12:-:19591977:19592084	AGGGCUAGUUGAUCGGCGGAGCUGAGGAGCCGGGCGGAGGCUGAGGAGCCUGACCUGGUUUUUCGACUGCUCUCCUUAUGGCCUGGUGAGUGCCUAGGGAAGCUGGGU
rno-novel-mir-1162	chr12:-:2001036:2001149	CUAAGGAUUCUGAGGAGGUGUGGGAGGGAGGCUGUAGGCCAUUCUGUGCUUGCUUUCUUCUGGGCAAUAGGAAAGGGCAGGCACUGAGCGGCCCUCCUCCCUCUCCCACAGCCA
rno-novel-mir-1163	chr12:-:21720507:21720617	CAGUGCGGCGCCUGCGCAUCAGUCCCCAGCGCGAAGGGUGGCGUUGUUGUUAUCGUCAAUGCCACCUUUCGCGUUGUGGAUUUUACAGCAUUAUCGCUGCAGCUUUGCUCC
rno-novel-mir-1164	chr12:-:21720514:21720625	CUCCGCUACAGUGCGGCGCCUGCGCAUCAGUCCCCAGCGCGAAGGGUGGCGUUGUUGUUAUCGUCAAUGCCACCUUUCGCGUUGUGGAUUUUACAGCAUUAUCGCUGCAGCU
rno-novel-mir-1165	chr12:-:21720516:21720624	UCCGCUACAGUGCGGCGCCUGCGCAUCAGUCCCCAGCGCGAAGGGUGGCGUUGUUGUUAUCGUCAAUGCCACCUUUCGCGUUGUGGAUUUUACAGCAUUAUCGCUGCAG
rno-novel-mir-1166	chr12:-:21720518:21720629	ACGCCUCCGCUACAGUGCGGCGCCUGCGCAUCAGUCCCCAGCGCGAAGGGUGGCGUUGUUGUUAUCGUCAAUGCCACCUUUCGCGUUGUGGAUUUUACAGCAUUAUCGCUGC
rno-novel-mir-1167	chr12:-:21981016:21981126	CAGUGCGGCGCCUGCGCAUCAGUCCCCAGCGCGAAGGGUGGCGUUGUUGUUAUCGUCAAUGCCACCUUUCGCGUUGUGGAUUUUACAGCAUUAUCGCUGCAGCUUUGCUCC
rno-novel-mir-1168	chr12:-:21981023:21981134	CUCCGCUACAGUGCGGCGCCUGCGCAUCAGUCCCCAGCGCGAAGGGUGGCGUUGUUGUUAUCGUCAAUGCCACCUUUCGCGUUGUGGAUUUUACAGCAUUAUCGCUGCAGCU
rno-novel-mir-1169	chr12:-:21981025:21981133	UCCGCUACAGUGCGGCGCCUGCGCAUCAGUCCCCAGCGCGAAGGGUGGCGUUGUUGUUAUCGUCAAUGCCACCUUUCGCGUUGUGGAUUUUACAGCAUUAUCGCUGCAG
rno-novel-mir-1170	chr12:-:21981027:21981138	ACGCCUCCGCUACAGUGCGGCGCCUGCGCAUCAGUCCCCAGCGCGAAGGGUGGCGUUGUUGUUAUCGUCAAUGCCACCUUUCGCGUUGUGGAUUUUACAGCAUUAUCGCUGC
rno-novel-mir-1171	chr12:-:22126145:22126255	CAGCUCAGUUGUGAAGUUGCUGAGGAAGCUGCACUGAGGGCUAGGGUGGCAGGCCAAGGCCACCAAGCUAGCAGGCUCUCUUCCUCAGGGCUCCCAGUGAGAAACUCUGAA
rno-novel-mir-1172	chr12:-:22128921:22129032	GUGGUCAGUAGCAGCCCAAACAGAUGAAGAGGUGAAGGGACGGGACUCUGGCUUUGCCUUUCCAAAUUCCUUUCCCUUCUCUUCCGUCUUCAGCCAAAGCUCAGUGCCCUCA
rno-novel-mir-1173	chr12:-:22229274:22229381	AACGACCGGGCCAGAGGAAGGGAGGGGAGGUCUGGGGAGUUACGUCCGUUUCCCAAGAGCCAAACCCGGGAGACGGAAGGAACCGAGGCUUCCCCCUGCCACACACAC
rno-novel-mir-1174	chr12:-:22236762:22236874	GUCGUCGUCGUCGUAGAGUCUCGUGGGACGUGGGAAGGCAGGACACCCCGGACUCUCCUGACUGUUCUCUCGUGCCUCAGGAGGCCUGGCUGAGCAGCAGCUCCCUACAGACA
rno-novel-mir-1175	chr12:-:22238720:22238831	UGUUUCUCAGAGGUGGGGACCAGAACCUGCUCCCGACAAUGAGCCGGUCCUUGUCGGUGCCAGAUUCAGGCCCCCUCUGGGACUUACAUACCUCAGCUUCAUCACAGUCAGG
rno-novel-mir-1176	chr12:-:22430542:22430649	AGAGGGCAAUCAACGAGAGGACGCUCAUGUGCCAGAGCGUCCACACUGGCGUGGUUUCUGCGGUUGUAUGCUGGGAAGGCGGGAAUUCUGGGUCUAGGCGCUGGGCGU
rno-novel-mir-1177	chr12:-:22478929:22479041	UCUGGUGUCUGGUUCCCGCAGGCUGGCGUCCGUCCCUGUCACGUGGGUGUCUGCCCCACCGCUGCGGGUCUGCGGGUCUGUGGGUCUGUCUGAAUCCACCACUGGAGCUGUGU
rno-novel-mir-1178	chr12:-:22496711:22496818	UGCUGUAGAAAGGGAGGGAACAGGAAGCUAGGGCAGGCCCGUUAGGGGCCAGGUGGGAGAGCCCCACCCUUAGUCUGCCUGUCCCCCAUGGCUCCAUCCUUUCCAAGG
rno-novel-mir-1179	chr12:-:22679781:22679891	UGCUUCCUUCUACUCAUCCGGGGGUUGGGAGCAGCACCCCCCGGGCGCUCCGAUGUUUAUCCUCCUCCCCUCGGCUCUGAGCAUAAUGGGCAGGUAGCUGAGGACGCAGUG
rno-novel-mir-1180	chr12:-:22799358:22799466	CUGUCGCGAGCCCAGCCGCCCGGCUGGCAGGCUAACGGACUUGCCGCUGAGAGUUCUGGGAAAUGUAGUUAGGCACGAGCAAGCUACCGUUAGUUGCCGGACUGCGGCG
rno-novel-mir-1181	chr12:-:23954305:23954414	GAUCAGGUGGCUCUGGACAGGACCGGCACUGCGCAGAGUGGAGGUCGUUGGAGUCACUUGUCUCCUCUCAGCUGCUGUGCCUGUAGGUCCGUGCCCCGCCCGUCCCAGCC
rno-novel-mir-1182	chr12:-:24006155:24006265	CUCACUGUCUCCAGCUGGAGCUAGAGCCUCCUUCAGCUUCUGCCCUGUUUGCCUGAGAUAAAGACAAGGGAAGACGGGGCCAGAAGCUGGAGAGGGAGGAAAGAGCCAGGC
rno-novel-mir-1183	chr12:-:24019216:24019328	UGCUGAGAUAUGACUCAGGCAUUUCUGACUGAACUGUGACUGGAGCAGCAUGCUCUGUCACAGGAUUAUGGGGAAAUAGAAGGGACAGCCUGCUCGGGGUUCUGGACCUCAUG
rno-novel-mir-1184	chr12:-:24346809:24346918	CUUUGCCGAAGGGAGAGCAUGGGGCUGUACGCGACUGCCGCUGCGGUCCUGGCCGGCGUGGAAAGCCGCCAGGGCUCCCUCAAGGGGUUAGUGUAUUCCAGCAACUUCCA
rno-novel-mir-1185	chr12:-:24501280:24501392	UGUCACUAAUUAAUCCCUUGUUGUGCUUUGUAGAUACUGGCUCUUCUCAAACGAGGUCCCAGGGUUAUUCAUUGAGAAGGGCUGGGUCCAUAACAGCAUCGACUACCGGUUUA
rno-novel-mir-1186	chr12:-:24709936:24710043	UCGGCGCCCCGCCCAUCCGCGCAUGCGGGGCUUACUCGGUUGCAGCCGGCGCCUACUGCCACUCCCGCGAGCAUGAAGGACCGAACCCAGGAGCUCCGCACGGUGAGU
rno-novel-mir-1187	chr12:-:25092909:25093018	GCCCGCUGCUGGCCCCGGCGCGCUCUGCGGCCCACGUGGUGGGGCGGCCAGCCCCCGGAGCGCCGCGCGCACGCUCUGCCCUCCGAGGCCCAUUGUGUGCUAGCUUGAAG
rno-novel-mir-1188	chr12:-:2534542:2534649	ACACAGGGACUCAACUCCAGCGGUGCGCGCAGGUGGGGUCGCUGAGAGCUGGGACAGGUCAGCUUAGAUCUGCCCAGCCCGCGCACAACAGGUGCGAACGCACUGGGA
rno-novel-mir-1189	chr12:-:2534592:2534699	CGUCUCCGGGCUACGCCCAUGCCCCGCCUGUGCGCUCCGCCGCUACAGCCACACAGGGACUCAACUCCAGCGGUGCGCGCAGGUGGGGUCGCUGAGAGCUGGGACAGG
rno-novel-mir-1190	chr12:-:2550634:2550742	UCCCCAGCCUUGCAGCUCCCACUGGCCAACGAUGGGGGCAGCCGCUCACCAUCCUCAGAGAGCUCCCCACAGCACCCUACGCCCCCCAGCCGGCCCCGCCACAUGCUGG
rno-novel-mir-1191	chr12:-:2554799:2554906	AGGGAGAGGGUCACGGUGACCUGGGAGUCGGGUGGGCAGUCUCCAGGGCUACUCGGUCCCCACACAUACCGCGGUCCUGAAGUUCACAGCAUGGGUACCUGAGAGCUU
rno-novel-mir-1192	chr12:-:25604469:25604581	GUGUGCUCCUAGCACACUCGUUAUCCUGUCCCAUCUGCUGCUCUGCUCCUCACCUCAGCCCUGUGCGCUACCACAGGAAGUGGGGAGAUCUGGGGCUCAGGGACUCCCCUUCC
rno-novel-mir-1193	chr12:-:27479030:27479139	CACGCGGAAAUCACCAGCUGAAAUGUGCGGUAAGGGCCACUGCCAAGAUGCCUAGCUGCCACGAUGAAGUGCACUCGGCAGGAUGGCAGCUGGGGAAACAAAGCCGCGCU
rno-novel-mir-1194	chr12:-:30312777:30312885	CUGUGGGUUCUGCGGUGGGGCACACCCUGGGUCACGCCAUCACUGGGGGCUUCAGCGGAGGGGCUAAUGCUGAGCCUGCGAGGCCUGACAUCACUUACCAGGUGAGACU
rno-novel-mir-1195	chr12:-:30465481:30465592	GCGCUUCCAGUGAAGGCAGGCUGAAGGAGGAUCUGUGAGCGGCCAGACAGAGACGGAGAAAGCACCCCCUCAGUACUGUCUCUCCCUGACCAGAUUCCAGAGGCAGCUGGAC
rno-novel-mir-1196	chr12:-:31323121:31323232	AGGGGCUGCGCGGCCGUGGGCGUGGGGAUGGCGCGGGUAGUGCAUGGCUGACCCUGCCGCCUUGUCCCCGCAGCCACCCUGGGCGUGGAGGUGCACCCGCUCGUCUUCCAUA
rno-novel-mir-1197	chr12:-:32525862:32525969	GACAAAGACAGAGGUGCUAUGCUGCCUGGCUGUCUAGCCUCAGCAGACAGAGGCAGGCAGUCCUCCCAGGACUCUCUGGGUUCUUCCCAGCAUCCUCGGUUCUCAGAG
rno-novel-mir-1198	chr12:-:36369646:36369753	UGCGUCUGUAUCCAAAGGGGGCGGGAAGGUGGGCAGGGAGAGUGAUGGUUUCCAGAGAGAUGGGAAAGUGCCUCUCUCUGCAACAAUGAAACCUGUCCCUUUGAUUGA
rno-novel-mir-1199	chr12:-:36396065:36396178	UAAAGAAAAUGGAUAACAGAGGGGGAAGGGGAGAGGGAAGGGGAUCUCUCUCUCUCUCUCUCUUUCUCUUUCUCUCUCUCUCUCUCCCGUUUUGUGGCUUGAAGGAGAAAUGAG
rno-novel-mir-1200	chr12:-:36571665:36571774	GCAUUGGUGCGCCUGGAGCGCACCUGUAGCUACAAGGAACUUCCAAGGCGACCCUCCCGGACUUUUAAAUUUCAAGUCCUGAGCUCUGCCCCCAGCAUGAAAGCUGCUUU
rno-novel-mir-1201	chr12:-:36678194:36678305	UGGCUCCCGUACAUCGUUCCCUCAAGGUAACUGGGACUUGGAACCACUACAGGAGGUGCUCCUGGGUCCCAGGACCUUGAAAUAGAACUUGGCUCUCAGGAGCCCUGAGCUG
rno-novel-mir-1202	chr12:-:36776658:36776767	AAUUCAGAGAUUAAAGGGAAGUCAGCUGAGGACAGGAGACUUAUGGAUGGGAACCCAGGGGGUCCCUCUGGGGUUUCCUUCUGUUUUUUCCUCUUCUCCCCUCCCUUUUU
rno-novel-mir-1203	chr12:-:37210149:37210261	AACCCAUCAUUCAGCCGGGCCUGGGCCGCGGGCAUGGCGGGGAGAGAAGGUCAGCGCGGUGCCCGCUGCGGUGCAGGCCCUAGUCGGGCCGGGACGAAGCUGAAGAGGCCCCG
rno-novel-mir-1204	chr12:-:37211370:37211478	UGGCCAGCGUGCGCGUCCGCGGGACCCGGGAGCUCAGGGCAGAGUACUUACGCGGAGCCACCCGGUCGCCAGGGCUGCGGGUCCGGGAGGCGGCAGGUGUGACGCGGGC
rno-novel-mir-1205	chr12:-:37211373:37211481	GCGUGGCCAGCGUGCGCGUCCGCGGGACCCGGGAGCUCAGGGCAGAGUACUUACGCGGAGCCACCCGGUCGCCAGGGCUGCGGGUCCGGGAGGCGGCAGGUGUGACGCG
rno-novel-mir-1206	chr12:-:37370834:37370941	UCGAGUACUGCCUUGGCUGCAUCUCCAACACUGCGUCCUACCUGAGGCUUUGGGCUCUCAGCCUGGCACACGCACGUAGGUUGCUUCGCCCAAGGUCUAUCUGUAAGC
rno-novel-mir-1207	chr12:-:37428151:37428258	UGCUAAUCUGUGGCUGUUUUGUUAGUUGUUGCUUGGAUGCUUGGUGCUGGGGUUUGAACCCUAGCCUUGCACGAGCUAGCCCUACAGCCCACCUCAGAACUGCAGUGG
rno-novel-mir-1208	chr12:-:37471842:37471954	AUAACUUAGCCGUCUGUCGAGUCCAGUUCCCCGGGUGUCAGACAGACAGACUGCUGUCCCUGUGUGCUGCAUAUCUGUCUGUUGUUGGCACUCAGGAAGAUGGAGUUCCUCAC
rno-novel-mir-1209	chr12:-:37580984:37581092	UUUGUUAGGGUGGCCAGCGCAGGGGGACUGCCUAGGAGAGAGCCGCACUGCUGAGAAUGCAAGGUGCGGGAGCGGACGCUCACAGGCAUCCUCCUACGGUGGAGUGCGG
rno-novel-mir-1210	chr12:-:37699474:37699583	UCGCUGAAUGUUUCCGGCCGGGAGCUGGUGCAGAAACAGGUAAGCGUCUGCAAAGCCAGGCUCGGACUAGGGCUGGUUACUACUUACUGUCAGAGGCUCUGGAGUGAGAC
rno-novel-mir-1211	chr12:-:37900209:37900316	CGUUCAAGUUCCGUCGGACCCGUUGCUCACUCUGGGACAGACUUUUUGUGGAGUGUAGCUUGUGGCAGAGUGAGGUCCUGGGUCUGAUGCGCUGCACACGAAGUGUAU
rno-novel-mir-1212	chr12:-:38041496:38041610	CGGGUCACAUUCCUCAGUACCUCAUGGCCUCCUUACUGCUGCACUGUGAGUGAGGCUGGGAGUAGCAGCCACACACGCCAUGAGGUGACGAGAGAAAGUAACACUCCCAGCUGGA
rno-novel-mir-1213	chr12:-:38053033:38053140	GCGCGGCGCGCGGCCUCUGGGUGCCUAGGCUCGAGCCGGUCGGUGACGCCUCAUUCGCGCGGAGCCGGGCCGGGACAGGGUCGGCGGCAGCAUGAACAGCAUCAAGAA
rno-novel-mir-1214	chr12:-:38061964:38062075	UACAGUGCUGCAAGAGGCCAGAAGAGGGCGUUGGGUUUAUGUGAGACCCUAUCUGCUGUCACAGAACCCACAGCUCCCUCAGUUCGGCCUCUGUGGUGUGAGCUGCAUGUCU
rno-novel-mir-1215	chr12:-:38144965:38145073	AGCCGACAGCAGGUCCUUUCUCCUCAGCCUGGAUCACAAGCUGCAUGUCCCCUACAGAGGUGAAGCCUGCAGCUGGGUCAGGCUCUGAGGCGAGAGCAGUUUUCCAAAA
rno-novel-mir-1216	chr12:-:38511515:38511626	CUAGUGGGCGUGCAGCAGAUGUUCCACACUGAGCAUGCCCAGAAGGGAGUCCACACUGAGCAUGCCCAGAAGGGAGCAUCUGCGCAGUCAUUUGUCUCUUUUCUGUGUUCCU
rno-novel-mir-1217	chr12:-:38573535:38573643	GGGAAAUCUACAGACCCCAAAAAUGUGGCUGCAUUAAAGGUAUGGCUUACUUCUCUUGGAUCGUGGUUUCCUUGGAGAGGAGAGAGACCAUCAGGAAGGGAGAGCCACA
rno-novel-mir-1218	chr12:-:38873905:38874012	UUUACCCUGGGGCACGGUCGCGGCGGGGGGUGUGGGGGAUCCCCGAGGGGGAGGCCCCAAUCGGCUUUCCCAGGCCCCAGCCCUCCCCCCCUUCCAAAACACACCUCC
rno-novel-mir-1219	chr12:-:38875729:38875841	CUCCUUUGCCUGGAGGCUCCAGCACGUGCUUCAGGAAGUGGGCUGGCGGGGAGGAGCCGGGGAUACAGCCCAGCCCCCACCCGCGCAGCCAGCAGCCACUCCCAGCAACAGUA
rno-novel-mir-1220	chr12:-:38896998:38897107	UGCACUCCAAGGACAUAGGAUCUGGGGGGAAAGGCCUUGGGCAGGAUGUUUUCCUUGAGCCCGGGUACUGUGCUCCCCCUACAGGCUGCGUUCAGUUCCUACAGUACUAU
rno-novel-mir-1221	chr12:-:38995552:38995664	CGGUCGCGGCCGCUUGGAACUUGCGGAGCGGUCCUGCAGCCAGUGCCUGGGCCUCCGGAUCCGGUGCGUCCGGCUGCGGGACACAGGCUCGAGUGGGAGGCCGGCGGAGGUGG
rno-novel-mir-1222	chr12:-:39674565:39674673	UGCCAAUAACUUUGACUGGCUGGAGAACUGUCUGGGCCACGUCGAGGACGACUACAUCCUAUUUGACUGUCCAGGUACAUCCCCAGCUUGAAUGUACAGUCUGCCCUGA
rno-novel-mir-1223	chr12:-:39690289:39690400	AGAAGCAGCCCACCCCACAGUCCAGGACCAUGUUAGGAAGUUUGUCCUUGUAAAUAGCUUCCCAGUUGGUUUUGGACUGCAUAGAAAACUAGUGCAUGAGGAGAAAGGAUCC
rno-novel-mir-1224	chr12:-:39734260:39734371	UGACAUAGGUGGGUUUGAACUCCUGACCUCCCCAAACCUGGAGCUUGCGGCUCUGACUCUCCAGUCUGGGGCGUCGGCAGAUCAGACCCACAGACAGAGCACUGUCUCCAGU
rno-novel-mir-1225	chr12:-:40370122:40370229	CUCUCUCAAGUUUGGGCCUCAUACGGAGCUCUGGCAGUGAGAAUGGCUCAUCCCAGGGUUAGUCACUGCUGGGGCUGAGGCUGAGCGCAACUUCCGCGUGGGAGCAGG
rno-novel-mir-1226	chr12:-:40881892:40882002	UCUUAGUCCUCUUUCCCGUCUUGCAAGGUAGGAAUGGCGGGUGUCUGUGUGGCAGCCACUCUCGGGACCCUAAUCCUCGUCCAUCCGAAGGCGGGGGACGUCCGGGGGCCA
rno-novel-mir-1227	chr12:-:40881942:40882052	GAAGUGAUCUCGGACACAUCCCGUCAUUGCUUAUAGACCGGAAGCCGCUGUCUUAGUCCUCUUUCCCGUCUUGCAAGGUAGGAAUGGCGGGUGUCUGUGUGGCAGCCACUC
rno-novel-mir-1228	chr12:-:41927390:41927501	UUCCCUGCCCACCUGACACCUGCUCUCUAAGGUGCUGCAGACCUGCAGAGGCAGGAGAGGAGCGCUUCCCUACUCUGUUCUGCUGUAGCACCUGACAUUGGGUCAGCGCCAU
rno-novel-mir-1229	chr12:-:43562954:43563065	CAAGAGAGAGCCUCGUUUUGUUUAAACUGGUGUAAAUCCUAUUAGAAGUGAAACCCUAGCUCAGAGGAGGCUCACUUGGAAAUAGGACUUAUGCCAUUUGAAGCAUCAUCUG
rno-novel-mir-1230	chr12:-:43940639:43940746	UAGGGGUCAUGCCGCGGGGUCGUCUCUGCGCCUGCGCCCUGCCGGGAUGCUGAACCUUGCGGCGCUGCUGUGGCGCCGGCUCCUGCGCAAGCGCUGGGUGCUCGCCCU
rno-novel-mir-1231	chr12:-:44037074:44037181	AGAUCACUCGUCUUUGAAGCAUACACGCAGCGCGCUCUGAGUCUGGCUCCUCUCGAGAGCCCUGACACAGAGGGAACUCUUGGAAUGGAGCCGCAGCCUCUCCCUGGU
rno-novel-mir-1232	chr12:-:44133576:44133685	ACAGCUCCUGUGCUGUGAGCCAGGGGACAGCAGAGAGCAGAGCUGGGUGCUCCCUCUCAGAGGCUCCAAACUAGUGGGACGGUAAGGUGCUCACCUCUGCGAGGAGGAGG
rno-novel-mir-1233	chr12:-:44135274:44135385	UGAGGAGCUCUGACUGGGCCUCCUGGCACUGUGUGGGGCAGACUGGGUGAGCUACACUGCCUCAGUGUGUGUCAAGAGCCCAGCAGCUGCUGAGGGAAGAGACACCACCAGC
rno-novel-mir-1234	chr12:-:44135275:44135385	UGAGGAGCUCUGACUGGGCCUCCUGGCACUGUGUGGGGCAGACUGGGUGAGCUACACUGCCUCAGUGUGUGUCAAGAGCCCAGCAGCUGCUGAGGGAAGAGACACCACCAG
rno-novel-mir-1235	chr12:-:44147455:44147566	GUGGGUGUGGCCACCCUGAUCUCAUGGGGUCAGUCAGGACAUUGUGACCAGGAAGUACUUUGCAUGGUUCUGGGCACUUAUUUCCUGACAGACGCCAGAACAGAGUGCUGGG
rno-novel-mir-1236	chr12:-:44174621:44174728	CGCCUCCCGCCGCUAUAAGAGGCCGCUCGAGCCCCACGCGGAACCGGCUCCGUGCCGCUGUCCCCGCGUCUCCACCGGGCUCGAGCUCAGCGCAGCCCAGGCAGUCCC
rno-novel-mir-1237	chr12:-:46794645:46794752	ACACACAAACCGGGAGGGCGGCAGUAGCAUGGGGACGCCGGGGUCGGGACCGAUGGGCUCGGGGAGGCUCGGGGUCGGGCUGCUCGUCCCUCCUGCGGCCUCUCCAGC
rno-novel-mir-1238	chr12:-:46862572:46862679	CACGGGCAGGAGCCUGUCCACGCAGGUGACUGAGAUGGAGCCGCCGGGUUCGGUUGCCGUCCCGCGACGGUCGCGCGUGGACAGGAGCUCACCGUGACUGUGAUGAAG
rno-novel-mir-1239	chr12:-:46916162:46916272	CGGGACUCAGAUGCCCACUUUCUCCUUCCUUCCCCGACAGAUGGUCACUCGAACUAAGAAGAUCUUUGUGGGGGGGCUGUCUGUGAACACCACGGUGGAGGACGUGAAGCA
rno-novel-mir-1240	chr12:-:47967228:47967339	UGCUGAUUCAGGUGUUGCUUCUCUGGGAAGGAGGAAGAGCAGACCAGCUGGAGUCCCCGCCUGAAGCUUGGUUCUCUCUCCUUUCCAGGCCUUACCUACCUUGAUGACCUGC
rno-novel-mir-1241	chr12:-:48292521:48292628	GAACAGCAUUUUCCAAUUCAAGAGGCCGUGCGGGGAUGCACCCCUGCAGGCUUUGCUCUUCUAAAGGGCGCCCUGCCGGCCUCCCUUCGCCCCCGCGGUACUCACGGC
rno-novel-mir-1242	chr12:-:48292571:48292678	GCUGGGCUAGGAAAAUGGCUUGUCUCCUCCAGGCCCAAUUCUUGCGUCUCGAACAGCAUUUUCCAAUUCAAGAGGCCGUGCGGGGAUGCACCCCUGCAGGCUUUGCUC
rno-novel-mir-1243	chr12:-:48520818:48520925	CAGCACUUUGUGCUUCAUUGUUAACUGGGGGAGCAGAGCAGUCCUCCUCCUCGAUGCCUCCAGUGAGCCUGGAGAACACAGGCCCUGAGAGAAAAUGAAAGGGCCCUU
rno-novel-mir-1244	chr12:-:48662849:48662959	UCAGAACCGCGUCAUCCCUCGUCUGUAAACUGGAGCCACAGGUAGCUUGCUCUUCACCGGGGGCUCACAGCAUGCAAGGGAUCGGCGGUCGCGUCACGGGCCGUGUGUAUC
rno-novel-mir-1245	chr12:-:49038079:49038186	UUAGGCUCCUCCCACAGCAAGCACUGUCAGGUCACAUGGGCACGAGCUGGUGCCUAGGAUGCUGCAGAGGACAGAAAAGCUGGGAGGAAGANGCCUAAUCUCUGAGGU
rno-novel-mir-1246	chr12:-:50315748:50315855	UACGUCAUCGCCAAGCCCCCACAGGCGGGAGGUGGGUCCGCGCGUGAUUGCCUGGCUGUAGGACGCAGGUAUUGGGUGCUGUCCCGCGGCCCGUACGGAGCCCGGGCU
rno-novel-mir-1247	chr12:-:50459038:50459145	CAGGUGUGGCCCUGGCUUAGCAGCUGGCGGGCUCUGGGGGAGGCUGGCUGGGGCAGAGGCAUGGAUAUAAACAGCAUAAGGAGCUGGGGUGACUUCCCAUCAGCCUGU
rno-novel-mir-1248	chr12:-:50908666:50908773	CAGACUAUUUAGUCUGGGUUUGGUGACCCCUUGACUGUGGCAGGGCGGGCUCAGGUUUCAGGCCUUUGCAAUCACAGCAGCCCCCUCUGCUUAGUUCUUACACAAACA
rno-novel-mir-1249	chr12:-:51165241:51165348	GUCCUGGGUGAGGAGGUCUUGUGGACAGGAGGCAUGUGAGCUGCUCUGUCCUGCUGGGUACUACCCUUUCUGAAGGAGCUGUCACAGUGGUCUGGAACUCAGGGACCU
rno-novel-mir-1250	chr12:-:51280734:51280846	UACGUGUGUGUGAGUGUGUGUAUGUAUGUCUGUAGCUGUAUGUAAAGCACAUAUGGCUACAGGCCUAGAUACACACGAGUGUAUAUAUAUAUGUACAUGUGAAGAUGGAUCAG
rno-novel-mir-1251	chr12:-:51280736:51280846	UACGUGUGUGUGAGUGUGUGUAUGUAUGUCUGUAGCUGUAUGUAAAGCACAUAUGGCUACAGGCCUAGAUACACACGAGUGUAUAUAUAUAUGUACAUGUGAAGAUGGAUC
rno-novel-mir-1252	chr12:-:51280741:51280852	UGUGGGUACGUGUGUGUGAGUGUGUGUAUGUAUGUCUGUAGCUGUAUGUAAAGCACAUAUGGCUACAGGCCUAGAUACACACGAGUGUAUAUAUAUAUGUACAUGUGAAGAU
rno-novel-mir-1253	chr12:-:51280791:51280902	GUGUGCCUCUGACGGCUCGGGCACACUUGUGCACACUCGAGGGGUGUGUGUGUGGGUACGUGUGUGUGAGUGUGUGUAUGUAUGUCUGUAGCUGUAUGUAAAGCACAUAUGG
rno-novel-mir-1254	chr12:-:52274404:52274516	UUCUAGCUCCUUCCCUAGUGCACAGCUCUAACAGAAACCGUGGCUGAGGCUUCGUGACAAGCUGCACUGAUCCCUCUGCUUCUGUUUCUCUGUUGCUGUGUGUGCUCUUGGCU
rno-novel-mir-1255	chr12:-:52274406:52274516	UUCUAGCUCCUUCCCUAGUGCACAGCUCUAACAGAAACCGUGGCUGAGGCUUCGUGACAAGCUGCACUGAUCCCUCUGCUUCUGUUUCUCUGUUGCUGUGUGUGCUCUUGG
rno-novel-mir-1256	chr12:-:52377101:52377210	AGCUCCUCCCGGCGCACCUCACGCAGGCGCUCCGGGCUGUAGUCGUGAGACUCGCGGUCCCGGUAGGCGCGCUCGGAAAGCUCGAACGGAGCGGGUCCCGCAGCGGGCGG
rno-novel-mir-1257	chr12:-:52506628:52506735	AUGAAUCAGGACCCCGGCUGCCUCCGAAGCCGCCUGAGGCUGGGGUCCUGGCGCGUUCUGGCCUUGGUCGUUGGGACACGGGAGGCUCCGCACUGCGCGCGCAGCGCG
rno-novel-mir-1258	chr12:-:5417734:5417847	CUUUUGCAACUACAGGGAGCUAUGAGGAGGACCACAGACCAUGCCGUGGUGAGUGUAGUCCUCCUCGUAGCUCCCCAGGCCAGAAGGAGCAGAUCUGCUGAUCUAUCCAUAUCU
rno-novel-mir-1259	chr12:-:5505265:5505378	CUUUUGCAACUACAGGGAGCUAUGAGGAGGACCACAGACCAUGCCGUGGUGAGUGUAGUCCUCCUCGUAGCUCCCCAGGCCAGAAGGAGCAGAUCUGCUGAUCUAUCCAUAUCU
rno-novel-mir-1260	chr12:-:6899639:6899750	GUGUGUGUGUGUGUGUAUAGAUGUGUGUGUGUGUAUAGAUGUGUGUGUAUAGAUGUGUGUGUGUGUAUAAAUGUGUGUGUAUAGAUGUGUGUGUGUAUAUACAUGUGUGUGU
rno-novel-mir-1261	chr12:-:6956861:6956968	UUGUAGGGUAGUUCUUUGGCGGCGGACUCCCAAGCGGAAGUUGCUUUCCUUGCUGAGACGGCUGUGGGGGAGGAGCCGUCCGAGGGAACGUGGGUUGAACGUUACGGG
rno-novel-mir-1262	chr12:-:6956865:6956972	GUGUUUGUAGGGUAGUUCUUUGGCGGCGGACUCCCAAGCGGAAGUUGCUUUCCUUGCUGAGACGGCUGUGGGGGAGGAGCCGUCCGAGGGAACGUGGGUUGAACGUUA
rno-novel-mir-1263	chr12:-:7137904:7138011	GAGCCGCACUUCCGCCAUCCGCCGGCAGGUGUCGCUUUCCUGGCCUCCGAAUCCACUGUGAGUUCAGCAAAUGGAGGCGCAUGGAGGAGGAUGGGACGCAGGCAGAGG
rno-novel-mir-1264	chr12:-:7375715:7375822	GAGCCGCACUUCCGCCAUCCGCCGGCAGGUGUCGCUUUCCUGGCCUCCGAAUCCACUGUGAGUUCAGCAAAUGGAGGCGCAUGGAGGAGGAUGGGACGCAGGCAGAGG
rno-novel-mir-1265	chr12:-:8840790:8840899	UCGGCUGCGCUUCAGCGAGGUCCUCGGGAGGCUCGGAGCGCGGUGGCGGACACUCCCCGGAGGUAGUGGUGGUAGUGGUGGCAGCAGCUCCGAGCGGGCUCCGGGACUCA
rno-novel-mir-1266	chr12:-:8976441:8976549	GUCCGGCCAGGAAGGAAAAGAGGGCGUGGGAGGAGAGGGAGUCGCGUUGGGCCGGGGCUCCCACGCUUGCUAUCCCCGGGGAGCGAGGGCCAAGGGCGCAGCUAGAGUG
rno-novel-mir-1267	chr12:-:9163995:9164106	GGAGGACCCUUUUCUGUGGCAUUAGAUGGGGGAGGGACAGCUGGGGUUCCCCCACCCAUCCCACCUCCCUCUAAACUGACAACCCCCAGUGUUUGAGCCUCCUCGUUCCCUU
rno-novel-mir-1268	chr12:-:9360398:9360505	CCGCGCGAGCCCGGGGGCUGCCAAGCGGGCUGAACUGGCGCAGCGCUGCGGCCGAGCCCACGUGCCCGCCGGGUCCUCAGCCUGCGCUCCUGGCACCCAAACUGCGGC
rno-novel-mir-1269	chr12:-:9988545:9988652	GCUCUUUAAAAUCCCAGAGCCUGGGCUGCAUCGCUGGCCGCGCCACAUCUCCUCGCUCUGUGUCCGCGCGUAUCCAGCCGGCUCUUCUGCAGCGGGGUCUCGGGACGC
rno-novel-mir-1270	chr12:-:9988595:9988702	GGAAGGGGCGGAGAAAAGGAGGCGCCAGAGGCAGCCACCGCGCUCCCCGAGCUCUUUAAAAUCCCAGAGCCUGGGCUGCAUCGCUGGCCGCGCCACAUCUCCUCGCUC
rno-novel-mir-1271	chr13:+:100741922:100742034	UAGCCAGUGCUCUUAACCUCUAAGCCAUCUCUCCUGCACCUGAAUUGUGUGCUUUAAAAAUAACAACUUUGGGGGCUGGAGAGAUGGCUCAGCAGUUAAGAGCACUGACUGUU
rno-novel-mir-1272	chr13:+:101300075:101300189	AGUUUGUCCACUACCUCCUAUGGUGAGUCACGGAGAUUUCAUCUGCCACCCGAGGCCUUGUGAGCGCUACAACCAUGGGACUGUGGUGGAAUUCUACUGUGAUCCCGGCUACAGC
rno-novel-mir-1273	chr13:+:101724752:101724863	GUUGUAGAUCCCCGGAUUGUAAGCUCCUCAGGGGCAGAGCCCCAUCUCUGUCAGGGAAGGUUCUAAGGCACUUGGUGGUGCUCUGUGCCUGGGGAGUGCGCAGUACAUUUUG
rno-novel-mir-1274	chr13:+:103197706:103197817	CGGCGAAAGCAUAUGCCUGUCUCCUUGUAACACUCUGGCCGCAGUCACAGAUGACUUUGGCAGAGUUAUCUUGUUGGAUGUAGCCAGAGGAAUUGCAAUACGGAUGUGGAAA
rno-novel-mir-1275	chr13:+:103197709:103197819	CGAAAGCAUAUGCCUGUCUCCUUGUAACACUCUGGCCGCAGUCACAGAUGACUUUGGCAGAGUUAUCUUGUUGGAUGUAGCCAGAGGAAUUGCAAUACGGAUGUGGAAAGG
rno-novel-mir-1276	chr13:+:103264522:103264629	CCGCGUGGGGCUUUGCUUUGGAACCCGCCCCCUUGGAGCCCGCUGGGAAUCCCAGAGGCCUGGAAGGCUCAUGCAGAGCUGGCCCACCCCGCCCUGCUCGGGUGGCCG
rno-novel-mir-1277	chr13:+:103268052:103268159	AGCCGCGGUCUUUCUCUGCACAUUGAACUGGUGGACCUGGAGGCAGCCUGUUCUGUGACAGCGAGCCACCAGGCCGGACAUCGCUUAGGGGACGCCAGGCUGACUGUA
rno-novel-mir-1278	chr13:+:103268052:103268160	AGCCGCGGUCUUUCUCUGCACAUUGAACUGGUGGACCUGGAGGCAGCCUGUUCUGUGACAGCGAGCCACCAGGCCGGACAUCGCUUAGGGGACGCCAGGCUGACUGUAA
rno-novel-mir-1279	chr13:+:105110064:105110172	UGCCUGUGUGGAGUGCUCUGAGGGACCUUGGAGACAGUUGUCUGGCGGAUGUUCGUGUCUCUGAUCUCAGUGGCAGGUAUGUAAGGUAUGUAGGGUGCCUUAGGGAAGC
rno-novel-mir-1280	chr13:+:105510829:105510936	GAAACAGUUCAUAAACCCACGGAAGAAAGCAGCGUGCCAAGGCCUGAGUGAGGGGCAGGGAGCUCAGAGCCAGCCUGCACAGCACUGCGAACAUCUAAAGGGUGGAGG
rno-novel-mir-1281	chr13:+:106256622:106256733	UCUAGGAUACCCACAGAAUGAAUGGUAGUAAGUGUUCUAGGUUACUCAAAGAAUGAGUAGUCAUGAGCAUUCUGUGGUAACCUAGAAUGAGUGAUAGUGGGUGUUCUAGGUU
rno-novel-mir-1282	chr13:+:107295782:107295890	GCUGAUGGGAGCUGAGUAACUUGGGGGGCAGGGGUGGUGGUGAUAGAUAAGCUAAGAGAUCUCAAACACCUGUGUGCAUUAAUUCAGUUCUCAAACCUAAGAGGGCAGA
rno-novel-mir-1283	chr13:+:107416929:107417041	AUGCAAAGCCCUGGCACAGCUUCCCUGCCCUCUGACUCUGACCUGCUCAAAGCUGGGAGGAGUCCAGAGAGCAGAGAGCACAGGGCUUUCAGUGCCAUCAGCUUCUCCUCUGC
rno-novel-mir-1284	chr13:+:108841809:108841917	GAGCCCGGGCUCCCCCGCUGCGGGCGCACGGUCCCCAGGGACGUCACAGCACUGGAAUCCGAGGAAUGCCAGGCUGUGGGAGCUCCUUCGGCCGACCGGGCAGAAGUCG
rno-novel-mir-1285	chr13:+:110677779:110677889	CCGCCACCGGGCCGAGCGCAGUCGCUGCGGACGCGGUCUCCCGAGCGCCUCGGUCCGAUGCUCGGCAGCCCCUCGGUACGCAGUGGCCCGCCGCGCCCUCCGCCUCGCCAG
rno-novel-mir-1286	chr13:+:113542152:113542264	GUACUAAACUGAGCCAUGGCCUUGCACUAAGGCAAGACAGUGAUGGGUCACCCUCUGACUGCUGAGCAAAUGAGUGGGGACUGCAGCCUUGUCAAGCCUCUUAUUGGGAGGUC
rno-novel-mir-1287	chr13:+:113542154:113542264	ACUAAACUGAGCCAUGGCCUUGCACUAAGGCAAGACAGUGAUGGGUCACCCUCUGACUGCUGAGCAAAUGAGUGGGGACUGCAGCCUUGUCAAGCCUCUUAUUGGGAGGUC
rno-novel-mir-1288	chr13:+:113542154:113542265	ACUAAACUGAGCCAUGGCCUUGCACUAAGGCAAGACAGUGAUGGGUCACCCUCUGACUGCUGAGCAAAUGAGUGGGGACUGCAGCCUUGUCAAGCCUCUUAUUGGGAGGUCU
rno-novel-mir-1289	chr13:+:113542155:113542265	CUAAACUGAGCCAUGGCCUUGCACUAAGGCAAGACAGUGAUGGGUCACCCUCUGACUGCUGAGCAAAUGAGUGGGGACUGCAGCCUUGUCAAGCCUCUUAUUGGGAGGUCU
rno-novel-mir-1290	chr13:+:113542202:113542314	CCCUCUGACUGCUGAGCAAAUGAGUGGGGACUGCAGCCUUGUCAAGCCUCUUAUUGGGAGGUCUGCUGUCUUCUCAGGAUCGUCUGUGAGAUGGGCCAUGCCCUUAUGGGUAC
rno-novel-mir-1291	chr13:+:113542205:113542315	UCUGACUGCUGAGCAAAUGAGUGGGGACUGCAGCCUUGUCAAGCCUCUUAUUGGGAGGUCUGCUGUCUUCUCAGGAUCGUCUGUGAGAUGGGCCAUGCCCUUAUGGGUACC
rno-novel-mir-1292	chr13:+:113551072:113551182	CAGAGGCCAUACUUGCUGACAGCCUUGGGUGUGAUGUGUGUAGGAAUGGAGAUUGUAUUUUUCUCUCAUCUCCCACACAGACACAUCCACAGGGUGACUGACAAGCGUACC
rno-novel-mir-1293	chr13:+:25967522:25967629	GCUGCGCCAAGCUCGGGACUGGAGGCGGGCUCGGCUUCAGGGCCCAGGAGGAACUGCUGCUGCUCUUCACCAUGGCUUCCCUGCACCCGGCUUUCUCCUUCCACCAGC
rno-novel-mir-1294	chr13:+:26316044:26316153	UUGUGUUGAGAAUACAAACAGAGUGGUUUCUGUUAGCUUUAGUGCAAAUGUUGAGAAGCUAGUUGUAAGCCACAUUUGCUUUGUAUUCUUCCGAGCCUCAGAAGAAAGGC
rno-novel-mir-1295	chr13:+:26812444:26812558	CAAACGGUGGCUUUUGGAACAAUGGAUUUUGUUCUGUGGUGAAGUCCUGGGAUUUCACUCUGAAAUCACAGGUUCCAGUUCGUGUAUUUCUGGUACACUCAGAAAAUGCUCCCUU
rno-novel-mir-1296	chr13:+:34274549:34274660	GAGAUUUCAAGCAUUGCUAACACUCAUGGGGAUUCUGAGGCUAACCAGGUAAGAUAAUCUGGAUAAUGGGCACUGGUUACUAUAGAAAUACUUUCAGGAGUGUUGGCAAGAC
rno-novel-mir-1297	chr13:+:35412665:35412772	CAUUCUAGCCUUACAGGCCUCGGGAAGGACUGAAUGAGGACACACAUGCAGAGAGCCCGCGUGGUGAUGCUCUGAGCUGCUCCAAGUCACAGCCUGAGGUGACUGCUG
rno-novel-mir-1298	chr13:+:37428188:37428298	GGAGGUGGGAGCUUGCCCACCUGCUCAGGAGCCUCUUGCUAAAGUGAGGUUGGGCAGGGUGAAGAGCAGGAGGGGUGAAGCUGCAGGCCCUAGACCAGUGAGGGCCAUACU
rno-novel-mir-1299	chr13:+:44160882:44160991	ACGGUUAUUUAUACUCCCAGUGGAUGGGGACACACAAGACUGUAUAUAUAGUGUGUAUACAUGUAUACAUGUGCGUUUUGUGUAUGUUCCUAGUGUGUGGUGUGUGCACA
rno-novel-mir-1300	chr13:+:44578211:44578318	UCAGUGCCCGCCUCCUAGCUCCCUUCUUCCCGACAGCCUUCGCGCGCGGCCUGACGCUCCGCUCUGCAAGAUGGCGGCGGACAGUGAGGUGAGUUUGGUACCCCGGGU
rno-novel-mir-1301	chr13:+:44578213:44578323	AGUGCCCGCCUCCUAGCUCCCUUCUUCCCGACAGCCUUCGCGCGCGGCCUGACGCUCCGCUCUGCAAGAUGGCGGCGGACAGUGAGGUGAGUUUGGUACCCCGGGUACGGC
rno-novel-mir-1302	chr13:+:44578261:44578368	CUGACGCUCCGCUCUGCAAGAUGGCGGCGGACAGUGAGGUGAGUUUGGUACCCCGGGUACGGCUGUCACAGGGUUCUGCCGCCGACGUCAGUGGCCCGCGGCUUACUG
rno-novel-mir-1303	chr13:+:44578263:44578373	GACGCUCCGCUCUGCAAGAUGGCGGCGGACAGUGAGGUGAGUUUGGUACCCCGGGUACGGCUGUCACAGGGUUCUGCCGCCGACGUCAGUGGCCCGCGGCUUACUGUCUGU
rno-novel-mir-1304	chr13:+:47439876:47439983	CCAGAAUCUCCAGCUAGACUAGGUUCUGGAAGGUAGACGUCGGCUUUUAAAGAUGCCUGGCUGGCUACCAGAAUGCAAGAGCUAACUCCAAUUUCUGGUCAGGAUCCU
rno-novel-mir-1305	chr13:+:47919070:47919177	UGUGUUUGCUGGUCCUUUUAGCUGAAGAGGAAACAGGCUCCAGAACCUGUGCUUCUUAGUACUCACCUAGCAGUGAAACCAGCCAUGGGCGCUUCAGCCGCACAGCUU
rno-novel-mir-1306	chr13:+:48193280:48193391	AUAUAAUUCCUACUGUCCAGAAAAGCAGAUGUUAUCCACAGUCAUGGUUUUCUCAUCUCAGGGCUUGUUGGUAAAACCAUGGCUGUGGGUAACACUAUUUUCUAUCUAAAAU
rno-novel-mir-1307	chr13:+:48848394:48848506	AGCGAGGGCGCAAGGGUUCUGAGCUCUCUCGGGGGUGAGUGAGACAAAUACAUAGCCCAGAUGUCACCUUCAGUCCCGAGAGAGUUUUCCGGGAGAGCUUGUGGUGGGGGAGG
rno-novel-mir-1308	chr13:+:49049853:49049960	CCAGGACUUGCUCCUAGAGUGCAGACAGGCAGCAGAUUUAGGACAGUGACUUAUUUCCCUGCCUUCAGCCUUGAAGGGGAAUGUGAUUGUCUAGGUAGACAGGCACUC
rno-novel-mir-1309	chr13:+:49144601:49144708	CCCUUCCUUCACGUAGAGGCACAGGCUCUUGGCUGAGGCUCUGGAGUUGCUCUUUCACUUCAGAGUCAAACACUAGGGACCUGGACGCUCUCUGGUCCAUGGGGGCCA
rno-novel-mir-1310	chr13:+:49661547:49661657	UGUUCCUCAGGCUGCCGCAGCUCCCAUCUGUUGAAGCCAACGCAGCUUCUAAUUGGACGACUGGCAGGGCUUGGAGGGGGUGGGCUGGGCACAGCGCUGGUUGCCGCUGGU
rno-novel-mir-1311	chr13:+:49661597:49661707	AAUUGGACGACUGGCAGGGCUUGGAGGGGGUGGGCUGGGCACAGCGCUGGUUGCCGCUGGUUGCCAGAGAUGGACUGGCUGCCGUCUGCUUGAAGACCCUAGGAGGCAGGA
rno-novel-mir-1312	chr13:+:49988167:49988274	AGCAUGCGUGGGCGGAGCCCUAGCUGGCACGCCUCUGCCAGAGCCCCUGUCCAGAUGGCUGCGGGGCACUGCAGGUGCUGGCCCGGUCCUCCCAUCCCGAGCCUCUGA
rno-novel-mir-1313	chr13:+:50252865:50252972	CCGUGAGGCCCCGGGGCGUACUGAGGAGGCCGGAAAGCGCGCGGAGUUGAAGGGCCGCGGGAGGCGGGCUCGGGUGUACUGUGGCGGGCAUGCGGUACGGAAUGGAAG
rno-novel-mir-1314	chr13:+:50510027:50510139	CAGAAAUGCCAAGCAGAGACAGUCCAUGCUCUGUCUGUCUGUCUGUCUUUCCUACCAGGGCUGCCAGGCACAGAGAGGCAUGGAGACUGUUUUUUGUCUGGAGGAAGAUGCCG
rno-novel-mir-1315	chr13:+:50758893:50759001	CCCCAUUCAGGGGGUUGGAGAAGGACUCAGACAGAUGGUCAAGCAAUCGCUGAUAACUCAGUGUUUCCUAUAGCCACCUGUCUGCCUGUCUCCCCACCACCUUUAAUCC
rno-novel-mir-1316	chr13:+:50921084:50921191	GCGAGUGUACGUAUUAAAGUGUAUGCGUGAGCUCGAGUUGGCAGGGUGAGGGAGUACGGGGCUGCUGCGUCCUCGUGUCUGGUGAAGCCUGCUUUCUGAAAGGGACCG
rno-novel-mir-1317	chr13:+:51578824:51578935	AGAGAGAAGGAAUAGUGGGUGCCUCUGCGGUUUGAAUGUCCCUGGGCUGACACAGGCUAGGGCUCAUUACUGUGGGCAGCCUGCCAGGACUUUUUAACUCUAGUUUGGAGUC
rno-novel-mir-1318	chr13:+:52188240:52188347	GGUAGGCUCCAGCUGGGAGUAGACAGACAGACAGCAGCUGGACCUGAAGGGUUGAUGCCAAAGCAGACGUUUCCUUCACACCACCUGCUGCUGUAUAAUAGCUAUAUA
rno-novel-mir-1319	chr13:+:52555434:52555543	GCGAGCAAGCUGCCUCUGGCCUUCCCAGGCACUGGCCUUCUUGGUCCAGCUGCUUUCUUUUGUAACUCACAGACUCUAGAACCAGUCAGUCCUUACUGGGUCAGAGUUGC
rno-novel-mir-1320	chr13:+:52870724:52870833	UUGGUGAAAUUCCUCCCUCCUGUCCUCGCCGUUCCUCACAGCUCCACAUCUUAAGGAUGUUUAUAGCUCUUUGGGAGACGGAGCUGUGCCGUCAAUAGCUCGGUGGGUGC
rno-novel-mir-1321	chr13:+:52870724:52870834	UUGGUGAAAUUCCUCCCUCCUGUCCUCGCCGUUCCUCACAGCUCCACAUCUUAAGGAUGUUUAUAGCUCUUUGGGAGACGGAGCUGUGCCGUCAAUAGCUCGGUGGGUGCG
rno-novel-mir-1322	chr13:+:52887921:52888028	GCGGGUCAAGUGCGUGAACGAGGGCUAUGCGCGCCUCCGCGGCCACCUCCCUGGUGCCCUGGCUGAAAAGAGGCUCAGCAAGGUGGAGACACUGCGCGCCGCCAUCCG
rno-novel-mir-1323	chr13:+:52890411:52890518	GGCAGGGACCUCAAUCUCUCUCUGGGUUUGUUCUGGAAAUAACAAUGACAAUAUCUGGGUUAUUUGGGGGAAAGGAGGGACUGCAGAGAGGAGGCCUGUGUUGAGUGG
rno-novel-mir-1324	chr13:+:53507005:53507112	CGUAAGUGUGGCCGGCGGGCCAGGGCGGGCGCGGGGGCGGCCAGGAAGGCCGCGGGGUCGAGCGCGCCGGGCCGGAGGCGGCAGGGCUGCGGACGGGCGCCGGGCGCG
rno-novel-mir-1325	chr13:+:53531122:53531229	ACUGGAGGCGACGGCGGCUGCGGCGGCGGCGGAACCCGUAAGUGUGGCCGGCGGCCAGGGCGGGCGCGGGGGCGGCCAGGAAGGCCGCGGGGUCGAUAGCGCCGGGCC
rno-novel-mir-1326	chr13:+:53570570:53570678	CCAGGGAGAGUUGCAGGCCCAGGGACCAGAGGCGAGCUCAGCUGCUCUGCUAGUCUUGCUGCUGUUCUCUGUGCAGCCUGGUGGCUCUCCUCAGAGCCUUGUGGGAGGG
rno-novel-mir-1327	chr13:+:5374566:5374678	UGAGCUGUGGCACUUGGACUAGCUGAGCACCCCACUGUCUGGAGAGGCAGCAGUGGGGGUGGUGCUUAGCUCGCUUGAGCUGUUAAUGGAAAGAUGCCCUACUGACCAGGUCA
rno-novel-mir-1328	chr13:+:54016374:54016485	CUUCCAUCAACACGAAGGGAAUUCUCUGUUGUCACAGUGGGUGGUGGCACCAGACACAAAUGCAGUGUUGCUUGGUCUAAAGCCCACUCUCUUUCUUUAAUAGCACAGAGUC
rno-novel-mir-1329	chr13:+:55560261:55560373	AAAACGAUUACUUUCAUUUCUCCCUCCUACUGCCUCUCCGACCUUUCUUGGUUGGCAAGUCAGUAGGAGGCAUAAAGGAAAAAAAAAGUGAUUUUUUUUUUUCUUUGAAGCAC
rno-novel-mir-1330	chr13:+:57131575:57131683	GGACUGGAGAGCUGUGGAGGGGAUGGAGGGAAAGGGAGACCAGCACUGAGGGAGUAGAAGGGAUUCUACAUCUCUCCAUUUUAACACUGUAGAGCAGUUGCUGUGGACA
rno-novel-mir-1331	chr13:+:60568104:60568215	AGUAGGCGGGGUGACGUGGGGUUGACGCUCCGCGGCGGGUUUUGCUGAGGUCUGCGGCCGGUGGCAGCUUGAGCUGCGGGCUUCGGAGAGCGCGAGGUGGAGCGGGGCGGUG
rno-novel-mir-1332	chr13:+:60849238:60849347	GCAGCCGCCGAAGGGUCUGGAAGUGAGGGCGCUGUUGACGUAGGCGCCGCAUCCUCGUGCGCACACAGGGUGGGAGGUGGCGGGCGGGGACAGAGAGCGAUCGCUGUUAG
rno-novel-mir-1333	chr13:+:68280856:68280963	ACAAGGGUAGAAGGAGGGGGAACUAUCAUGACAGCACCAGAUAGAGAAGUUUCACUGCCUUCAGAUGUUUCUCUGUCCUCUACCUCCUCAUACCCCACCUCCAUCCAC
rno-novel-mir-1334	chr13:+:69798078:69798185	CUGCCUCACUUCCUGGGCUGCCUGGAGCGGCUGGACUAUCCCAAGAGCAGGAUGGCCAUCUGGUGAGCGGGUAGGGGUCCCUGGCCACCGCGGAGCAUGAGGGCAGCC
rno-novel-mir-1335	chr13:+:70558996:70559105	UUCUACAGGCUGGCCCUGCAGCAUGGGGAUGGCCACGUUGUGGAUUACCUGUCCCAGCCGGUCAUCGACUACAUCCUCAAGAGUCAGCUGUACAUCAAUGCCUCGGGCUA
rno-novel-mir-1336	chr13:+:7095166:7095277	UAAGAACUUCACAGCCAGCUCUCCUGCUUGUCAGAGAUGGCAAGAAAUGAGACGGGGAACAUCUUUUUCUUGUCUCCAUUCCUGCCACUGCUGAGAAGACAAGAGGCAGUCC
rno-novel-mir-1337	chr13:+:71110296:71110403	CCUGGUGAUUUGGUAGAAGCUCUUGGUGGUGACUUUAGGGGUAGAUAAGGGCCAUGAACUUGUUUGAAAUUGUGAGUUACUGGGACAGGGGUUUGUAGCGAAAGAUGA
rno-novel-mir-1338	chr13:+:71112335:71112446	GCCACCUGGGGUGGGCAGGGCAGCAGGUCCAGGGCAUAGAGCUGGCAGUUGUGGCCAUGACAUCCCCUUCCUUCUGCCCCCACCCACUGCAGGAACAAAGGCAUGAGGACUC
rno-novel-mir-1339	chr13:+:71331022:71331132	UGAGCAGCCCGCAACCCUGCACAGCCGAGAAUGGGAGUAGGGCGGAGUGUUUGAGCAGCACACCCAUUUCCUCUCCGCUCUUCGUCUCGUUCUCGUGGCCUGUCCACCCAU
rno-novel-mir-1340	chr13:+:71331033:71331140	CAACCCUGCACAGCCGAGAAUGGGAGUAGGGCGGAGUGUUUGAGCAGCACACCCAUUUCCUCUCCGCUCUUCGUCUCGUUCUCGUGGCCUGUCCACCCAUCCAUCAUC
rno-novel-mir-1341	chr13:+:71340121:71340232	ACUCCUUCCACUUGGCUCUUAGGGGAACUGAGGACAGGCCUGGAGUUAAUACACUUGUCAUUCUGUGUCCUAGUGUCCUCUUCCUCCUAAGUGCUAUAUCGUUCCUUCUUUC
rno-novel-mir-1342	chr13:+:71340862:71340973	CUAGAUUUUAAUUAACCGAACACUAGGCUGGUGAACUUGGAGUUCUCUCUGUUUUGUCCUGGUUUUCCCCAAGUUGUCCAGCCUAGGUUCCUAGACUUUAAGACAGCCGAGA
rno-novel-mir-1343	chr13:+:71340863:71340974	UAGAUUUUAAUUAACCGAACACUAGGCUGGUGAACUUGGAGUUCUCUCUGUUUUGUCCUGGUUUUCCCCAAGUUGUCCAGCCUAGGUUCCUAGACUUUAAGACAGCCGAGAC
rno-novel-mir-1344	chr13:+:72744463:72744570	AACGUUAGUCCCGCGGAGCAAGCUCUUAAAGGGGGAGAUCGCAGGCGACCCUUUGAUCAAGUGCGGUGGGAUUUGUGUUCUGAGCGGGUGAUGUGGUAGAACGAAGCA
rno-novel-mir-1345	chr13:+:73708775:73708882	CUCACGUCACGUGGGCGGUACAGGCGACAUUCUGCCGUGGCGGCUGGGGGUUGCAGACCAGCGCUGUGGAGCAGGAGGGACAGCCGAGUGGCGCCGCUGAUCCUGACU
rno-novel-mir-1346	chr13:+:73708825:73708932	UUGCAGACCAGCGCUGUGGAGCAGGAGGGACAGCCGAGUGGCGCCGCUGAUCCUGACUGUCCCAUAUUUUAAAACCUGGCUGGAAAUUGUAAGUAAGCAAAACGAAAA
rno-novel-mir-1347	chr13:+:73736579:73736691	AAAAAAACAAAACAAAAAAAAAAAGAGUCUGUCUAACUACGGCACAGAUGAGUCUGCUUGCUGAGAAUGGGGCUCUUUUUUAAAUAUAUUUUUUAUUUACAUUUCAAAUGUUA
rno-novel-mir-1348	chr13:+:74241369:74241480	AAUGGUGGGACGCGGCUUGGAGUCGCUGGAGUCCCAGAGGACGCAGAGCAGCCAGGCUGGUCUUCUCCAGCCAAGGCUGUAGCUGUCCUCCCAACCACUCACAACCACAAAG
rno-novel-mir-1349	chr13:+:75060003:75060111	AGACUGUCCGGCUCGGACCGCCUCUCGGUGCGGGAUCUUCGAGCUGCUGGUGGAAGCUGAGACGGUGUGGGGAGGCGGAGAGAAAAGGGGGUGCGGGAAAUUUAAAAAG
rno-novel-mir-1350	chr13:+:76055535:76055644	AUCGCAGCGCUGGGAGGAAGGCGGCCAGGGCUCAAGAUGGCUUUAGCCGGGCUAUGCGCCCUGUUCGCCUGCUGCUGGGGGCCGGCUGCCGUGCUGGCCACAGCUGCCGG
rno-novel-mir-1351	chr13:+:76943276:76943383	UCAACUUUAUUGUUCCCCCGGCCCACCUCCCGGCGCGUCCUCAGGAUGCUCGGGAGCUGAGCGCCGGGGGCGGCGGAGGGUCGCGGUUCGUCCCGGCCCUCGCCUCAG
rno-novel-mir-1352	chr13:+:76943318:76943427	AGGAUGCUCGGGAGCUGAGCGCCGGGGGCGGCGGAGGGUCGCGGUUCGUCCCGGCCCUCGCCUCAGAGCACAGGGCCAAGGGAGGGAGGGAGUCACGAUGUCAGGUAGCC
rno-novel-mir-1353	chr13:+:79460749:79460863	UUAGCUCAGUGGUAGAGUGCUUGCCUAGCAAGCGCAAGGCCCUGGGUUCGGUUCCCAGCUCCUAAAAAAAGAAAGGAAAAUUAAAAAAAAAAACUUUUUAUUUUAAUUCAAUUUC
rno-novel-mir-1354	chr13:+:81659681:81659789	CGAAGGCUGGGGGAGGGCCUAUGGAUUCUUCCAGAGGAGUGGACCAGCAGCUGUGCAUUUGCACUCCAGAACCAUCUGGGGCUGUUCCUGGGAGCCUGCUCUUUACAUU
rno-novel-mir-1355	chr13:+:81969308:81969418	AGGAGCAAUUUGGGGUUGGAAGUUGUAGGUUGGUGACCUCAUCCCUCCACAGGGGAUCUUCUCUAACUACAAGAGGUGGUCUCUUCAGGUUCCAUAUUCCCACUGGUCUUC
rno-novel-mir-1356	chr13:+:82237503:82237614	GAGAGCUCACAACAGGGCCACUCAGCUUUGUGCUUGGCUCUGGUGACAUCCGGGUGGAGGAUGCUUCUGCUUCCUCGGGCUCUGUUGUCAGUAUGGCUGAGUCACUGUUUUG
rno-novel-mir-1357	chr13:+:82584788:82584898	CCCUGAGUCGUGUGUGUCUGGUUCUAAAGGUCUAGCUCUCAGGGGGCUUCUGGAUGAGAGCUGACCUGUAGACACCAAGUCAUGCUCAGGACUUGGAACUUCCUGUUCCAC
rno-novel-mir-1358	chr13:+:82588322:82588429	AUAGAGAAAAUAGCAGAGCAGCAGGCUGUCAAAGAGAGAGCGCGGCAGCUCCGACUGGAAGCUCGGCGCUCCAAACAACUGCAGAGCGGCCUGUACAGUGUGCCCGAG
rno-novel-mir-1359	chr13:+:82758195:82758304	AGGCUAGAGGGGCUGGCACAGCAGCAGUGGUGCGGAGAGGGACUUGGGGUGAGUGAGUAGUGCUCCCGAAGCUCUGCUGGCCCUCUCUCCGCCCCAAGCUGUGCCUGGAC
rno-novel-mir-1360	chr13:+:82758196:82758304	GGCUAGAGGGGCUGGCACAGCAGCAGUGGUGCGGAGAGGGACUUGGGGUGAGUGAGUAGUGCUCCCGAAGCUCUGCUGGCCCUCUCUCCGCCCCAAGCUGUGCCUGGAC
rno-novel-mir-1361	chr13:+:84514704:84514814	CCUUGAAAGAACAGAACCUCAGGGAUUCUGGGUGUGAGGGUUGAGGAGGGUGGGGCUACAUAAUCUCUCUUGCUCUUCAUCUCCCUCCACAGUGUAUGAAGCAGGGAAAGC
rno-novel-mir-1362	chr13:+:84761631:84761738	CCCUGGUGUGCUCAGGGAUUGUGAGCAGAGCAGAGCUGCAGUCAGAUCUCCUUGCCGCUCCCUGUGGUUCCUUUCCUGGGUGGCUUCUCCCUGUAGAAGAGUUGAGCU
rno-novel-mir-1363	chr13:+:85517132:85517239	UGUCUCCAGCAGGCCACCGUAACCCCUCUUGCUGCGCGUGCGCAGGCCGUAGAGGUAGUUUUUUUGGGAGAGCGUGGGGUAGGAAGGGGGAAGGUGUGUGCCUCACCU
rno-novel-mir-1364	chr13:+:85519025:85519132	UUGCGCGCGGGUCCGGAGCAGCCGCGGCUAGCACAGGCUUGGCCCCCAGUUCCUGUCUGCGUGUGGGGCUCCAGCGGCUGAGCCUGGCCGCUCCGAGUAGCGCCAUGU
rno-novel-mir-1365	chr13:+:85622629:85622736	UGUCUCCAGCAGGCCACCGUAACCCCUCUUGCUGCGCGUGCGCAGGCCGUAGAGGUAGUUUUUUUGGGAGAGCGUGGGGUAGGAAGGGGAAGGUGUGUGCCUCACCUU
rno-novel-mir-1366	chr13:+:87447610:87447720	UUCAAAGAUAAGAAGAUGGCUGGAUUUCCAACUCAUCACUCUAAUCUCUAGUGAUCACAAUGGGAAGCAUCCGCUGUCUUUUCCCCUCUCUCUCUUCUUUUUUCCUCCUCU
rno-novel-mir-1367	chr13:+:88626157:88626267	UUCAAAGAUAAGAAGAUGGCUGGAUUUCCAACUCAUCACUCUAAUCUCUAGUGAUCACAAUGGGAAGCAUCCGCUGUCUUUUCCCCUCUCUCUCUUCUUUUUUCCUCCUCU
rno-novel-mir-1368	chr13:+:89286699:89286806	CCAGUCGAAGCGGCGCACAGGCCGGCUGUACUUGUAGAAGGCGAACUGCAGCGGCGUGUCCCGCUUCUGCGGGUGCAGGCGCGUCUCGCAGCGCAGCACCACGCGGCC
rno-novel-mir-1369	chr13:+:89661251:89661360	ACCGACACCAUGGAAACGCAGCCAACUUUAGAACCACUAGUUUCAGGCCCUGCCUGAUGGUGGUCUUUAAACCAUUGCUGCAAGUCCCUGAGGCCAAGGCUCCUCACCCA
rno-novel-mir-1370	chr13:+:89797813:89797920	GGGGGAAAUUGGCGACUGAAGCGGCCUGGGCCGGUGAGUGCGUUGGAGCGGGCCAGAGUCCGGAGACGGGGUGGAUCGGCAAGGCGGGGCACCUUUGGUUUUUGCUAG
rno-novel-mir-1371	chr13:+:89988647:89988756	UUUUUGGUGGAGGUGUGACUUGUGAAGUGGAAUCCUGGACAGGAAACCUUCUGAAGGUUUCUGAAGUUCUAGUCUUUAUUUUCUUCCUCACACAGAGUCCAUCGCUAAGG
rno-novel-mir-1372	chr13:+:90755654:90755768	UGCAAACGCUAGAGUGCGAACACCUGGACUGAUGAGCCGCUGAGCUCAAGAUACUCUCAAGGCAGAGGCUCAAGUCCAUAUACAAAAAUCCUAAAGCGUACUUCGUAUGUCAGAG
rno-novel-mir-1373	chr13:+:93928202:93928310	UUUAAUGCUCGUGUGCGCCCUCUGGUGUUGCUGCAUUUUUGGUCCCAGUUUUACAGGAGACACAGCUGGAGUGCAAAGGGACCGGAAGGCAGUGUUUCAGCUCUACACA
rno-novel-mir-1374	chr13:+:94942025:94942136	CUCCCUGGAUGAUUUGGAGCAGCAAAGCAGCAAUUGUUCUUUGGUCUCUCAGCCAUGACCUGACCUUCUGUCUGAAAGACCGAAGAGCUAUUUAGCUUGGCCACCAUCUGCA
rno-novel-mir-1375	chr13:+:96066458:96066570	CUCCAGCUUUUACUUUGUAAAUUGGGAAGGAAGAACAAGGAGAUCAUAACAAAUGUCCUUUUUUUUUCCCCCAACAGGGAACUUCUGAGAGAUAGCCCACAUGAAAAUUUGGU
rno-novel-mir-1376	chr13:+:96304081:96304188	GUAGGGUCCUGACUAGGGAGCCUGAGAAGCGCAGCCAGGUCUCCAUCUUGAGCCCCUUGGCGGGCGGACGGUGGGUUGAGGAGCGGCGCCAGCCAGCGCCCCCGCUGU
rno-novel-mir-1377	chr13:+:96304131:96304238	AGCCCCUUGGCGGGCGGACGGUGGGUUGAGGAGCGGCGCCAGCCAGCGCCCCCGCUGUCGGCCCAGCCCCGCUCCUCCGCCCUCGGCCGCCCCGCCCUCCCUUCCCCU
rno-novel-mir-1378	chr13:+:96377514:96377626	CCUCUGAGCACAAGACCCCAUCUGGUUUCGAUCCACGCAGGCCCUGUGCAUGCAGCCAUAGUCUCUGAGCUCACAUGCGUGUCGGUCCUGCUGUGUUUAGAAGGCCUUGUUUC
rno-novel-mir-1379	chr13:+:96403692:96403804	CCUCUGAGCACAAGACCCCAUCUGGUUUCGAUCCACGCAGGCCCUGUGCAUGCAGCCAUAGUCUCUGAGCUCACAUGCGUGUCGGUCCUGCUGUGUUUAGAAGGCCUUGUUUC
rno-novel-mir-1380	chr13:+:97250188:97250295	CAGAGACACAAGCUUCCUUCCUGUCCGGCUCAGUCACAGUCUCUGUAAAGUUGAAUCUUUCACAGAGGACUGGAAGGAUUUGACAAUGUUCUCCUGGGCUGGGGCGUC
rno-novel-mir-1381	chr13:+:98139200:98139307	CAGAGACACAAGCUUCCUUCCUGUCCGGCUCAGUCACAGUCUCUGUAAAGUUGAAUCUUUCACAGAGGACUGGAAGGAUUUGACAAUGUUCUCCUGGGCUGGGGCGUC
rno-novel-mir-1382	chr13:+:98614331:98614438	UUUCCCUGUUUCCACUAAACGCUAGAGUUUAAGAUUUAGGGAAUUAUGCAAAACACAGUUGCAGUGCCGGAUGAAGCUUGAGUGUGUAUGUUUGGGGGCAGGAAGUGU
rno-novel-mir-1383	chr13:+:98857187:98857294	GGCGGUCGCGCCGCCAGGCAUCAGCAAUCUAUCCUGAACGGAGGCGGCUCCGCACGCUUGCGGAGAACCGACACGUUAGCGGAGCGGACCGGCGGCGGCGUCUGCCUG
rno-novel-mir-1384	chr13:+:99103309:99103418	UUGAAAACGCGCCCAAGCAGGAAGCUGGCAAGUGGAACCCCAGUCCCGCGGCGCCCACUUUCGGACCGCGCGGCGCGGCAGGGGCGGGGGCCCGCGGGCCUCUUCCCGCC
rno-novel-mir-1385	chr13:+:99573394:99573501	CACUAGGAUAUUAGAGAACAUGUGUCACCACGUCCUGCAGGGCUUGGCUUCUGGAGCCCUGCCUAGGGGUGCUGAGGGCAUGAAGAAAGGACACACGCUUGUACAGUG
rno-novel-mir-1386	chr13:-:101684120:101684231	GCUAAGCAGUGCUCCAGUGAAACAGGGUGAAAUGAUACUUUGCUUUUUAAAAUGUAACUUUAGAUCAUACUUUGUCCAGUUUGGAGCCUGCACACUCUGCUAAGUGGAGAAA
rno-novel-mir-1387	chr13:-:101730485:101730596	AAGCAAAUUGUUCCCCAAGAGCCCGAAGGCCCCUCAGUCUCCAGCACUGCCCCUUUAGCUGAGCAUCCAGUAGCAGGAAGUGUUUAGAGACUGAGGGCUGGAGUGGCCCCUG
rno-novel-mir-1388	chr13:-:102743803:102743915	AGUAUAGGCGGUGAAGGUACAGGAGCUCCAUCCAUGGCAGUGCCCCUUGACAGGCAUUGCCGUGUCCGAGUUCCACUCUUCAUUCACUGCAGCCUGAAAGGGGCAGUCAAUCA
rno-novel-mir-1389	chr13:-:103259086:103259198	CUCUCACAGGUCGGUUUGGCUGGAGCUGGGUCGUUGGACAUGACGGGGCUACGGUGCUUGCUCAUGCUCACAACCCUGUUUCCACAGGUGCCUCAUCCCCUGUUAGCGCUUUA
rno-novel-mir-1390	chr13:-:103259093:103259205	CUGGAAUCUCUCACAGGUCGGUUUGGCUGGAGCUGGGUCGUUGGACAUGACGGGGCUACGGUGCUUGCUCAUGCUCACAACCCUGUUUCCACAGGUGCCUCAUCCCCUGUUAG
rno-novel-mir-1391	chr13:-:103259139:103259249	GGUCGGUGUAUGUGAGAUUCCCUCUCCUGAAGCCUCCACCUACGCUGGAAUCUCUCACAGGUCGGUUUGGCUGGAGCUGGGUCGUUGGACAUGACGGGGCUACGGUGCUUG
rno-novel-mir-1392	chr13:-:104080384:104080497	GUUCGCUACAGCUGGGGAAGCACCCUCUUCUCGGUCCCCUAGGUCCCUAGUGCCAGCGCCCGGGGUCGGGAGGAGGCUGCCACUUCUCAGAGGGAGUCCUCUUUCCAUGUGCUA
rno-novel-mir-1393	chr13:-:104080536:104080643	CGCCUUGCUCUCGCUCUUCCGCCAUGGCUGCAUUACCCAGCGCUGUGCACCUUCGGCGUUGUGUGGUGUCCCCAGCCGGGAGACACAGUGCUUCGCUGAUCUUCCUGC
rno-novel-mir-1394	chr13:-:106109998:106110106	AUAGACAUUUUCCCUGCUACCCACCCGGCCCAGGCAGACCAGCACCAAGGCGGCAGGAGCACCCACCCAGGGCCCCACUCUUGUUCGCAGCUCACGCUGGCUGACUUGC
rno-novel-mir-1395	chr13:-:107690399:107690507	GUGUAAUUUUUAAAGCCCAGAAGGAAAAGGAGUCCUCUACCUGCAAUCGCAAAACCGAUUUCUUUUCCUUCUGGGGGAGGAGGGAUGGGCUUACGUGAGCACGUGGCAU
rno-novel-mir-1396	chr13:-:108690102:108690212	AAUAAAGUUAUGCAUGCUGUUGUUCAUCAGUAACAAGCGUUUGCCUGCCAGCCUCUGCCACAGACAGCUCUGAGGUGUAGGGUGCUGGCUUUUGACAGUAUUCUUUUGCAC
rno-novel-mir-1397	chr13:-:110035720:110035828	UGCAAAGCUCUUUGUGGAUGUUCCUCAGCAAACAGUCUUACCAGCCAGUGCUCCGGUGCCACUGUGGAAACGGAUGUGGCUGAGCUGGCUGCACCUGGCCUCCCCACAC
rno-novel-mir-1398	chr13:-:110511202:110511310	UUCCAUUCCUCCGCUGAGGUCGCUGUGGUAACGGAGGUCCAAAGAUCUCAGACUGGAGACGCUGGCCUUUUGACCUUUCCACUUUGACCCCCCAGCCUUUUCCGACUCA
rno-novel-mir-1399	chr13:-:112075954:112076063	AUGAAUGCCAGCCUGCUUCAGGGGCCUGGGAGCACUCACAGCUCUAGUCCUCCCCUCCAGGAUUAGCUUCCCACUGCACUGAGACCCAGGCCACUUCAAAGCUCUCCCUG
rno-novel-mir-1400	chr13:-:113871786:113871893	CCUCCUCCACCGCUUUGCCGUGAGACUGGGCUUGAGACCGCUGUGAGGGGAAUGGAGGCUUCUUCGCCUCUGGACCCCGUGGGGCGCCUUGUAGCCUUCUGCCGCGGA
rno-novel-mir-1401	chr13:-:1945226:1945333	AUCUGGUAUGAUCCAACGCUCCCCCCACAGCCUCCUGUUGAUUUUGGCACUGCAAAAAUGCACACAUUUCCUAACUGGGGUGUUGUGACUUAUGGGGGUGGCUUACCA
rno-novel-mir-1402	chr13:-:25214655:25214766	CAUUGUAUGGUUUGCAUGUGUGGCGUAUGCCUGUGUGCAUGUUGGCUUGUCGUGCAUGUGUGUGUGUGCAUGCAUGCUUGCUAAUGUGAACACACACAUAUGCAUUUGUUCC
rno-novel-mir-1403	chr13:-:25262240:25262347	AAGGAGGGACGAGCUGGGAGCUGGGCUGCGGGAGGCGCUGCCGCCACUCUGCCCGCGCUGCCCCGCAACCCGCGGCGGGAGGAGCAGGCAGCAGCCGGCCCUGGGCGC
rno-novel-mir-1404	chr13:-:26682927:26683035	AACCCUGGAAUUGAUUCUAAAGGAUGGUGGUUGUUAGAGAUCAACGGAUUCUUUAGCACGACCCUUCUGCCGGGUCACCUAUUCCACGAACGAAACAUUCGUGCUCUUG
rno-novel-mir-1405	chr13:-:34241051:34241162	CUUCACAUCUCUACUUUCAUCAAUGAGUUGGAUUCAGGUUUUCGCCUUCUCAAUCUGAAAAACGACUCCCUGAGGAAACGCUACGACGGCUUAAAGUAUGAUGUGAAGAAAG
rno-novel-mir-1406	chr13:-:34730759:34730866	ACAUAUUGUACGUGAAAUUGUCAACUCGGUAGAGGGGUCUGGGCCUGCUGAUUAUUGGCAGAGCCUGGCCCAGCCUGCUCAGGAUGGCGAGAUGGUGAUGUGUCUGUC
rno-novel-mir-1407	chr13:-:35554455:35554562	CUCGCCCCGCCCCGGGUCCCGCCCCGCCCCAGCCUCUCGCCUCCCCUCGCCUCCCUCGCCUCGAUCCGCAAGGGGCAGGAAGAGCCUGUCACGGCAAGGGCGGGGAGC
rno-novel-mir-1408	chr13:-:36156396:36156508	AUGCGCUGUGCACCACGGAUUCUUCCCUAGAUUCCCUGAAAGGGGUCGGAACAGCCCAUUUUCCAGGCGGGCAACUUCCGGCCUCUUUCCAAUCCACUGGGAUUUAAAGGGAA
rno-novel-mir-1409	chr13:-:41738064:41738175	UCUCUAGGGCGUGUGGGUGGGGAGAGCGGAGAACCGGGCUGUGAAAAUGGGAAGCUAGAAUGGGGGCUUUUGCAGAGGACCCACGCGCCGCCUCUUUUCCGCCCACACCCAU
rno-novel-mir-1410	chr13:-:45894865:45894973	AAAAUUUUUUGGGCCCCUUUUUUUUCCCCUUUUUUUUCAUUUUGGGGGACCCCAAAAAAUGAAAAAUUGGGGGUGGGAAAAAAAAAAAACCCUAUUUGCCCCCCUAGGG
rno-novel-mir-1411	chr13:-:47788465:47788575	UGACCUUUGCUUUCCAGCUCCGGAAGUACUGGGCCCAGAGAAGUAUGACAAGUCCUGUGACAUGUGGUCCUUGGGUGUCAUCAUGUAUAUUUUGUAAGUGGGCUGGAGCGU
rno-novel-mir-1412	chr13:-:48155901:48156010	CAGUUUAUACAGAAGAUUGACGUGCUCUGGGUUGGGGAUUCUAUCCUCAGCUUUUCACAUUGCUUACGUCAGCCCCGCAUCCCAUAGGAAUGUGGAGCUGACAGUGCUAU
rno-novel-mir-1413	chr13:-:48609907:48610015	CAAGGGCUCUCGCCCAGGGCCAUCCGAAGAACAAGGAGAGGGAGUAGGGCCAGUACCGUUCGGCUGGUGGAUGUCCUUUGGCUCUGGCUUUCUCCUGUACUGUCCGUCC
rno-novel-mir-1414	chr13:-:48987868:48987975	AUUGUGCUCCAGGCUAGAGAUGCAGCUCGGUGGGAGAGCAUUUGCCUCUAGUGGUUCUGAGGCCUUGGGCUUCAUCCCAGCCCCUUGCAGCGGUAUGGAGUGGGGAUC
rno-novel-mir-1415	chr13:-:49133037:49133145	GAAUAAAUAAAUAAAGUUCCUAUCCUUUCCACGCUUCUGCCCGGCUGGGCUCCAGGGAGAGGACCCUACCCGUCCUCCCUCUGAAGCCCGGGCUUAUUCUUGGUUCAUC
rno-novel-mir-1416	chr13:-:49414380:49414489	GGGAUUCUGAGGAUGUAACCUGCUGCCUUGCUCUUCAGCUUGUGUAAUGCUGGCAGGCUGGAGCUCCAGGUGGUCCCAGAGUGCUGACUUCUCAGACAGCCCUCCCCCCU
rno-novel-mir-1417	chr13:-:49522379:49522486	AGCACGCAGGCCGUCGGGGACGCGCUGGCCGCCCGGGGGCGCGCACGGGCUAGUCUCUGCCCUAAUGCGGCGGCUGGCGGCGAGAGCUGCUGCAGGGGACGCGGGCGA
rno-novel-mir-1418	chr13:-:49932800:49932911	ACCCUCUGGGUUAAAGGGAAGGACUGGGGGAGGUGAGUGGGUUUCAAGAGAACCUGAGAAUUCCCCGGAGCCCUUUUUUUUACGGAUCGGGUACACUAGGCAACGUACCGGA
rno-novel-mir-1419	chr13:-:49932850:49932961	UGCGCAUGCGCAGUCAGUUCGUUCUGGUCUCCUAGGAGACUCCGCGCUCCACCCUCUGGGUUAAAGGGAAGGACUGGGGGAGGUGAGUGGGUUUCAAGAGAACCUGAGAAUU
rno-novel-mir-1420	chr13:-:50636045:50636152	AGCCCCAGUCUGGCCGGAGUUGGCUGGAGCUGUUGCCAUGACAAGCAUUUUCUUAAGACAGCUCUGCUGUUGAGUCGGUCCUAGGCUGGGGGUGGGGUGGGGGCACGA
rno-novel-mir-1421	chr13:-:51182194:51182301	GCUGUCCUUAGCCUGAUGAAUCCCUCCUGGUGUGAGCUUUAGAAGGCUGCUCCAGGAGCCAGGUUUCAGGGACUCCCUGCAGUCCUUUCCAGAGUUGUUGGAAUUGGC
rno-novel-mir-1422	chr13:-:51384720:51384830	CGGGCCGCGCGUCCUCGCUCCCUCCCCCAGCCGCGAGCAGGAUCCGGGGUGCUUGGCUGACUCACCGGCGGCGGCCGCACCUUACAGAUCCCAGUCUGCUCGGCUAUGGGC
rno-novel-mir-1423	chr13:-:51645172:51645283	ACUGCCUGCUCUGUUCCUUCUGGUCCCAUUUACUGCAGGCAGUGGCAGAGUGCACAUGGGUUUACACUGCAGUCUGCCGCUGCCCUGUCUCUUACGUUUUUAAAAAUAAGUU
rno-novel-mir-1424	chr13:-:51992451:51992558	CUUAGGUCCCUCGCCCUCACCUCUCUGAGGCAGCUGUGCCCUGCUUUCCUGGCCAUGCGGUGGCUGUGGCCCCUGGCUGUCUCUCUUGCUGUCGUGUUGGCUGUGGGG
rno-novel-mir-1425	chr13:-:52096553:52096663	ACAGCAAAGGGCCAUCACCUCUGCCCUGAGCUCACAGUGAGGUCUGUUGGGUGCUGUGAGCAAAAGGACAUCCUGGCCACCACUGUGAUGUCAGCACAGGGAGGCGCUACU
rno-novel-mir-1426	chr13:-:52111099:52111209	CAGCAGCUGCCACAGCGCGGCCCGGCGGCCACUUCACUCGGCACAAGCCGUGGACGUGGCCUCGGCCUCCAGUUUCCGCGCCUUCGAGAUCCUGCACCUGCACCUGGACCU
rno-novel-mir-1427	chr13:-:52135835:52135946	GUGUGCGGGAACUCAGCACCCCGAUGACCUUGUGCAUAGGGAGGAGGUCCGGUGCCCGGCUUGGUGGAGCUUUGGAACCUCCUCCCUAGGGCAGGUGCUGUCGACCUUGUGU
rno-novel-mir-1428	chr13:-:52135836:52135946	GUGUGCGGGAACUCAGCACCCCGAUGACCUUGUGCAUAGGGAGGAGGUCCGGUGCCCGGCUUGGUGGAGCUUUGGAACCUCCUCCCUAGGGCAGGUGCUGUCGACCUUGUG
rno-novel-mir-1429	chr13:-:52197444:52197551	CAGGCCUCCCUGACCGCAGUGACCAGCUGUUGGCUGUGCCCUUAAGGGCUCAGACUGAAGGAGUCACCGCACUGUUGUGGACAGGGAGAGCAGGGCUGUGCCUUGGGG
rno-novel-mir-1430	chr13:-:52278245:52278354	AGCUUCGGGAGACCAUGCACAACAUGCAGGUCAGUGUCUGGGCAGAGCUGCAGAAGAGGGAGGCAGGGCCUACCGUCUCUGCCACCCUGCCACCUGCCCUGUGUCUUCUG
rno-novel-mir-1431	chr13:-:52278245:52278355	CAGCUUCGGGAGACCAUGCACAACAUGCAGGUCAGUGUCUGGGCAGAGCUGCAGAAGAGGGAGGCAGGGCCUACCGUCUCUGCCACCCUGCCACCUGCCCUGUGUCUUCUG
rno-novel-mir-1432	chr13:-:52428619:52428726	UUACUCAUCCUGACCCCUGUGAGCUGGGACGAGGACUUUUGCUCUUCAUGUCCGCUGCAGGCUGACAUUGGGGAGCCCUUUGACUUGUUAGCUUGGAUGCCACCCUCU
rno-novel-mir-1433	chr13:-:53175484:53175596	AUUCCAUUGGUGGAAAACUUGUUGAAGGACGGCACGGAUGGCUGUGCGCUGGCUGCCCUCAUUCACUUCUACUGCCCUGCUGUUGUCCGACUAGAAGGUAGGCGUUCCGGGGA
rno-novel-mir-1434	chr13:-:53185956:53186070	UUCAGCUUUUUUUCAAGCCACAGAUCUGCCCUAUGAUAUCGAGGAUGCUGUCAUGUACUGGAUAAAUAAGGUAGGCCUGUCCUCGCUUGGAUACAGUUCUAACACAGGAAACUGA
rno-novel-mir-1435	chr13:-:55119339:55119449	GGGUUCUGGCUGCUGCUGUAUGUGUACCGUCUGGAGGCAGCAUAUACUUUUCCAUUAUUAAUGUCGUCCCAUACACGAAACACAAAAUGCAGCAUCCCUCCCUCUUCAUCC
rno-novel-mir-1436	chr13:-:6345910:6346017	CACUAUUGUGGAUACUGGCAUUGGAAUGACCAAGGCUGACUUGAUCAAUAACCUUGGCACUAUUGCCAAGUCAGGCACCAAAGCCUUCAUGGAGGCUUUGCAGGCUGG
rno-novel-mir-1437	chr13:-:70018368:70018479	ACUCCGCGACCCUCUUUUUCUUUCUCUUUAUCCCAUCCCUGGCAGAGCUCGAUUCAGGACUGGGGUGAAGAGGUAGAGGAAGGAGCUGUUUACCAUGUCACCCUCAAAAGAG
rno-novel-mir-1438	chr13:-:70018369:70018479	ACUCCGCGACCCUCUUUUUCUUUCUCUUUAUCCCAUCCCUGGCAGAGCUCGAUUCAGGACUGGGGUGAAGAGGUAGAGGAAGGAGCUGUUUACCAUGUCACCCUCAAAAGA
rno-novel-mir-1439	chr13:-:70783422:70783529	CUCCUUCCUCCUGGGGCGCGCUCUCGAGUGCGCGCUCGGAAGUCGGGGGUCGGCGCAGAGUGCAGGCUGCGCACCGGGAGGCAGCGGAGGCAGCGCGAUCUUCGCUUG
rno-novel-mir-1440	chr13:-:71329958:71330072	UUUCACAGAGAAAACGUGUCUCAACAAACAAUAAGAAAGCAAGGGAAGAAAGAAAUCCCUGCUUUUGCUUCUUGUUUGUUUUUAAGUAUGUCCCCUCGCCCCGCCCCCCCCCCCC
rno-novel-mir-1441	chr13:-:71906884:71906991	ACCAAAUUGCAUCAUUUCCCUUUGCAAGAUGGGCACUGCCAUAGUCCUGCCUCUUUGCUGGGGAAAGAAAAUACAGGAAUGUGGGGGUUUAUUCCCAUGGGAGAAGGG
rno-novel-mir-1442	chr13:-:72744165:72744272	GGCGGAGGGAACUACGCAUCACUAGAUCUUUUCUCCACCGAGCUUUCACACGCUGAGGGUACAACCACAGAGGCGAACCUGUUCCUGCCUCUCGCGCCUCUCUCAGCU
rno-novel-mir-1443	chr13:-:74077751:74077860	GCGCGUGACGCAGCCGCGGGCUGGGAGGUUGGGGCGGAGAACGGGGGUGGGGGCCUGCGCUUUAUCUUCCUCCGUAGCCCGGCUGGCGGCGUUGCGGGCUGGCGAAGGGA
rno-novel-mir-1444	chr13:-:77959060:77959168	GGGGGCGGGCCAGGACUCGGCGGGGCGGAGCUGGGCGGGGCCUCGCGGGCUGGUGGUGGAGCCUCGCGAAGGUUCCAGAGCCGUCUCGUGCGGAGGGCGGGCCGCCGAG
rno-novel-mir-1445	chr13:-:78608853:78608963	GCGGUCCUCUCCCCUCCCUAGCCCGCUCCCUCCGCCCCGUUCCCUCCGCCCUCCUUGGGCUUCGGCGGCGGCAGAGUGAACGGGACGGGCCCGGCCGCAGAGCUCUGGGCG
rno-novel-mir-1446	chr13:-:78608861:78608968	GCCGUGCGGUCCUCUCCCCUCCCUAGCCCGCUCCCUCCGCCCCGUUCCCUCCGCCCUCCUUGGGCUUCGGCGGCGGCAGAGUGAACGGGACGGGCCCGGCCGCAGAGC
rno-novel-mir-1447	chr13:-:80518367:80518479	UUGGCCCCGUGUUUCUCAUUUGGCUGUGGGCUGUGAUCAUUUUGUCAUGACUGAGGACAAGAGUUCAGAUCCACUGGCCUAAACAACGAGUCAACUUGCAGGAAACAUGAAAA
rno-novel-mir-1448	chr13:-:80546221:80546333	UCAAAUAAUGCCAGCAGCCACGGGGUGAAGUGAUCUGUGGCACUGUCCUGUGAGAUACACAAGGGGCAUAGAGCAUUUUACACUGACAGCUGCUACACCGAUUACAACAAGGC
rno-novel-mir-1449	chr13:-:80547106:80547218	UUUACCAGCUCAGAAUGUGGUAGGAGCGAUCAGAACUUAGUGAUCAAGUGAAGUUGUAGUUACUAAUUUCUGAUGCUCUUCCCCUGCAGAAGAGAGCUGUGGGAAGAGGACUC
rno-novel-mir-1450	chr13:-:80547108:80547221	UUAUUUACCAGCUCAGAAUGUGGUAGGAGCGAUCAGAACUUAGUGAUCAAGUGAAGUUGUAGUUACUAAUUUCUGAUGCUCUUCCCCUGCAGAAGAGAGCUGUGGGAAGAGGAC
rno-novel-mir-1451	chr13:-:80575805:80575918	GCAGAGGAGGAACAUUCAGACGAGGUGGGAGGGAUCCUGGAGGCCGGCCAUCCCGCCCUGCUACCUUAAGAAGACCGUCGGCUUAUCGGGACAAUCAGUGGAACCCAAGGCAGG
rno-novel-mir-1452	chr13:-:82757727:82757834	GCGGCCACGCGCCCACCUCUAGGUGCGGGGCUCGGAGCCGCCCAGCCCGCGCGCGGGGAGGAGGGAGGAGGGAGGAGGGAGGCGGGGGCGGCGUGGAGGGGGAGGAGG
rno-novel-mir-1453	chr13:-:82757777:82757884	GGUUCGCUGAGCCCCCCGGGAGGCGAUCGGAGCGCGGGGAGAGCAGGAGUGCGGCCACGCGCCCACCUCUAGGUGCGGGGCUCGGAGCCGCCCAGCCCGCGCGCGGGG
rno-novel-mir-1454	chr13:-:83680861:83680968	GCUGGCCUCACAGAGCGGAAGAGGCGUGGUCAGACUCUCACCUCCUUCCGGUCCUAGAGGACAUUUUGGAGAGGGGAAACUGAAGCCGCGCUUCUGUCCUGUCCCUCA
rno-novel-mir-1455	chr13:-:83680863:83680970	UGGCUGGCCUCACAGAGCGGAAGAGGCGUGGUCAGACUCUCACCUCCUUCCGGUCCUAGAGGACAUUUUGGAGAGGGGAAACUGAAGCCGCGCUUCUGUCCUGUCCCU
rno-novel-mir-1456	chr13:-:88497893:88498002	CGCCGGCGCCCGCCCCUUUGGCCGCUCUCGGUCGCUGACGUGUCCAGCCGGCAGGCUUCCGCUCCGCCCCUGGGCCGCAGCCACUCACCGCGGCGAAAGGGGCGGGGUGG
rno-novel-mir-1457	chr13:-:88510648:88510759	CUCAGGCUUUGGCAGUGAUGGCCCCUUCUGCCCAGUCUCUUUCAGCUCCUGAGGGAAUGACAACCUCCUUCCUGGAGUGAAAGUGACUGAGAGGGCGGGUGCUCCGUUCCCA
rno-novel-mir-1458	chr13:-:88510650:88510758	UCAGGCUUUGGCAGUGAUGGCCCCUUCUGCCCAGUCUCUUUCAGCUCCUGAGGGAAUGACAACCUCCUUCCUGGAGUGAAAGUGACUGAGAGGGCGGGUGCUCCGUUCC
rno-novel-mir-1459	chr13:-:88510650:88510762	UGACUCAGGCUUUGGCAGUGAUGGCCCCUUCUGCCCAGUCUCUUUCAGCUCCUGAGGGAAUGACAACCUCCUUCCUGGAGUGAAAGUGACUGAGAGGGCGGGUGCUCCGUUCC
rno-novel-mir-1460	chr13:-:88753542:88753653	AGAAGGAGAUCGAAAGCUCAAGUCUGGCACCCAUACUUAAAGAUGGUAGCUCCUGCAGGGGUGGUGGCCUUCUGCAGGACAGCUAGCAUUCUGAAGUCUGGGUGGCUGUCCU
rno-novel-mir-1461	chr13:-:88764367:88764478	AGAAGGAGAUCGAAAGCUCAAGUCUGGCACCCAUACUUAAAGAUGGUAGCUCCUGCAGGGGUGGUGGCCUUCUGCAGGACAGCUAGCAUUCUGAAGUCUGGGUGGCUGUCCU
rno-novel-mir-1462	chr13:-:89449008:89449119	GGCCCAGGGCGUGCCCAUUGGGGUCCUGUCUGGCGACUCCGAGCUCUUUGCGAGGCUUACUACGGGGAGAAGUUAGGAGAGCGCCAGACCUUUUCAGGUGGUGCAGAGUGGG
rno-novel-mir-1463	chr13:-:89505104:89505216	CUUUUUGGCCUGUCGGCACUGCUGCUUCCUGGGAACUUUGAGUCGUAUCUGAUGCUUGUGAAGUCCCUGUGUUUGGGGCCAGCGCUGAUCCAUGCAGCCAAGUUCGUGCUUGU
rno-novel-mir-1464	chr13:-:89668180:89668288	UUCUUGAGCCCUGGUCCAAGAUGGCGGACGAGGCCACCCGGCGGGUCGUGUCUGAGAUCCCGGUGCUGAAGACUAACGCCGGACCCCGAGAUCGGGAAUUGUGGGUGCA
rno-novel-mir-1465	chr13:-:90589461:90589570	GCUCUGACAUCACCGGCCAGUCGGGUGGGGUGAGGCGGUGCUGGGCUCAGGCUCUGCUCCACGCCGCCUUCUCCGCCGCCGCCGUCCUAGCCGCCGUCGCCACCGCGGAG
rno-novel-mir-1466	chr13:-:90657456:90657564	AGAACGGCUUCCUGCCAUCGAGGCUGCUUGGGAUCCGCCUUGACUGGGAUGAUCGGACUACCAACGACCUGGAGGACAGCUAUGGACAAGAGUGGGUGAGUGGGGCUGU
rno-novel-mir-1467	chr13:-:90658961:90659070	CUGGCCUGAGCGUAGAUGGUCAGAUGUCUCUGCCCCUACCCUCCAGAGAAGCCAAGGCAUGUGUAGUGCACGGCUCAGACCUGAAGGACAUGACUUCAGAGCAGCUGGAU
rno-novel-mir-1468	chr13:-:90658996:90659108	AAACUCAGGCACACAGCGGGCAGGGAGGGGCAACAGGACUGGCCUGAGCGUAGAUGGUCAGAUGUCUCUGCCCCUACCCUCCAGAGAAGCCAAGGCAUGUGUAGUGCACGGCU
rno-novel-mir-1469	chr13:-:90659007:90659121	CCACCUCCCAGAGAAACUCAGGCACACAGCGGGCAGGGAGGGGCAACAGGACUGGCCUGAGCGUAGAUGGUCAGAUGUCUCUGCCCCUACCCUCCAGAGAAGCCAAGGCAUGUGU
rno-novel-mir-1470	chr13:-:90659009:90659121	CCACCUCCCAGAGAAACUCAGGCACACAGCGGGCAGGGAGGGGCAACAGGACUGGCCUGAGCGUAGAUGGUCAGAUGUCUCUGCCCCUACCCUCCAGAGAAGCCAAGGCAUGU
rno-novel-mir-1471	chr13:-:90659594:90659704	CCCUAGUAGUUUAUCUUGACAUAAUUUGGAGAGAGGAAUGGGGAGGGAGAAACCAACAUAGCUUUCUCUUUCUGCCUUCUCCUUCCUAUCAGGUGAUCAUGGUGACUGGGG
rno-novel-mir-1472	chr13:-:90659595:90659703	CCUAGUAGUUUAUCUUGACAUAAUUUGGAGAGAGGAAUGGGGAGGGAGAAACCAACAUAGCUUUCUCUUUCUGCCUUCUCCUUCCUAUCAGGUGAUCAUGGUGACUGGG
rno-novel-mir-1473	chr13:-:90659596:90659706	UGCCCUAGUAGUUUAUCUUGACAUAAUUUGGAGAGAGGAAUGGGGAGGGAGAAACCAACAUAGCUUUCUCUUUCUGCCUUCUCCUUCCUAUCAGGUGAUCAUGGUGACUGG
rno-novel-mir-1474	chr13:-:90674999:90675106	AAACCCUACCUCCAUCUAAGUAGAGAGAAAGAGCAGACACUCCUCAACCCUCCUCUCUCUACCUUAGAGUAAGGUGGACCCAGCUCACAGAGUUCUAUCUACUUGGAA
rno-novel-mir-1475	chr13:-:90675622:90675731	CUUUACAUACUGUGCUUGGCAGCCUUCCUUCUGUGGAACACUGGCGAAAGAGGGCAUGGAGGGAAAGGGCUUGACAGGCCAUUGCAAAAUGUGAGGAAGACAGUGCCACA
rno-novel-mir-1476	chr13:-:90693021:90693130	GAUGGUGACUCCGCCUCUGGCCGCAGGCUGGGCGAACUGGCACCUGGGCUCCUCUACCCCCACCCACCCUAGCUCAGAGGGCACCCCGCCCUGCACCUGCCAGCCUCUCC
rno-novel-mir-1477	chr13:-:90746846:90746953	AGGGUGCAAUUUCUCCAGAACAGUGCCAGCCACGCACUGGGGCUGGCAUUCCACAGAAGCGCUUGAAGAGAGAGACUGAGCCGGUCCAUCGACCACCUUUGCCCUCUA
rno-novel-mir-1478	chr13:-:91018837:91018947	CUUGUCCCGCGAGGGCCUGUGAUGUGUGGGGCGGGGACAGGAGAGUGUCUGGAAGGGCAUUGGACUCCACUCUAUCGGUCUCCACUUCACAGGCUGUUGGAGUGCACUGUG
rno-novel-mir-1479	chr13:-:91850345:91850452	AAUGGGAAAACCUUCACUGUGAGCAGCUCGGUGUCAUUCCAGGUUACCCGGGAUGAUGAUGGAGCAAACGUCGUGUGCUCUGUGAACCAUGAAUCUCUGAAGGGAGCU
rno-novel-mir-1480	chr13:-:92263920:92264027	GUAAGAGAAUUUAAAAAUCAGGAAGAAAUUCCAGGUUUCUCUUCUGAUUCCACAUUGGAGAGCUGAGGGAAUUCAGAGGGGACAUGAUUUUCUUGUUCUGAUCUCUUU
rno-novel-mir-1481	chr13:-:92570610:92570717	AGGAACCUCAGGAAAGGUGAAGGCUGGUGAAGAGAGCGUGUCUGUGACUGCGGAGUGGGCGGUCGCAUAGCCCGGUGUCUCAGAGGCCAAGUGGCUUCCGGAGGACGG
rno-novel-mir-1482	chr13:-:93535799:93535909	CCCUGUCCCACGUGACUGUCGCCUCCUCCCUCCUCCCAGUCGCGCGCGCACGGGUCGGGCGUCUCGACUCCCGCGCGCGCUCGACUGGUCCCAGUCCCCGGGAGGAGAAGC
rno-novel-mir-1483	chr13:-:94886622:94886733	UCAGCCUGCCGGACGACUGUACCCCACGUAGCCUCUAGCUCUGUAGUAAACCCACGGGAGGAGCUAGUGGCUUCCUGUGGGCUUCAUUGUCCCAAGAUUCAGUCGUAGGGUU
rno-novel-mir-1484	chr13:-:94886630:94886742	UGCUGUCACUCAGCCUGCCGGACGACUGUACCCCACGUAGCCUCUAGCUCUGUAGUAAACCCACGGGAGGAGCUAGUGGCUUCCUGUGGGCUUCAUUGUCCCAAGAUUCAGUC
rno-novel-mir-1485	chr13:-:96304118:96304229	GAGGGCGGGGCGGCCGAGGGCGGAGGAGCGGGGCUGGGCCGACAGCGGGGGCGCUGGCUGGCGCCGCUCCUCAACCCACCGUCCGCCCGCCAAGGGGCUCAAGAUGGAGACC
rno-novel-mir-1486	chr13:-:96304134:96304241	UCAAGGGGAAGGGAGGGCGGGGCGGCCGAGGGCGGAGGAGCGGGGCUGGGCCGACAGCGGGGGCGCUGGCUGGCGCCGCUCCUCAACCCACCGUCCGCCCGCCAAGGG
rno-novel-mir-1487	chr13:-:96304360:96304468	AGAUGGAGGCGGCCAGCGCCUGGGGCCGGGCUGGGCGGGGUUUCUGCACGGCCGCAAAGGAUCCCGCCAGGUUCUAGCGCCAACUUCUGUCCUCCAUGAGGCCGCCCUC
rno-novel-mir-1488	chr13:-:97269601:97269710	GGACGAGACCUGGGUUCCUGGUCGCUUUGCACGGAGGGAGCUCUGCACGAAGUAACGUGUACUCGGCUCCCCAAACCGUGUUUCUCGGCGCCUGGGUCCCUGCCCUUUCC
rno-novel-mir-1489	chr13:-:97300003:97300110	AUCUGCUGCCCCCAGGACUGAGCAACACCAAGUCUUCUGCUUCUAGGGAUGACUCGCUGAGAAUGCCAGAGCACCCAGGAGAGUAGGAGACAGCUGCUGGUCUGGAUG
rno-novel-mir-1490	chr13:-:97525380:97525493	CCUUGUUUUAGAGAACAGUUGUGUGCUGGGUCUUGCGGAGGACUGCCCUAUCAGAACACUUAAGACUUCCUAUGCCAUUCCCUUUCCGCGACCCAGCACUGCCUUCUCUCUGUU
rno-novel-mir-1491	chr13:-:98647694:98647805	AUCACGAAGCUCACAUUUUCCAGAAGCCUUUCUAGUGGCCAGGGGGAGAGAAGGGAUUCGAAGAUUCUGAUUCCCUCUGCCCUGUGCCCUACCGACUUCUUGGGUCAACCUU
rno-novel-mir-1492	chr13:-:98691741:98691852	CUCCUCUGGCAGAGGCCCCAGGAGGGCGGUGUGGUGCAGGCCCAGGCAGGUAGGGUACUCAAUGCCCCUUCCUGGAGCCUGCUUAGAAACUGUGCCUGCCACAAAGGUCAGU
rno-novel-mir-1493	chr13:-:98752104:98752215	CGCAAGGGCUCUUGAGAGUGGGUUAGGAUAUGGCUCAGCGCUGCUUAAGUGCACACCUGGGCACUGCCAAAGGGUCUGAAUCAUUCAGAACCAUGACUCAUAAGGAAUUAUG
rno-novel-mir-1494	chr13:-:98924513:98924622	GGACGAGACCUGGGUUCCUGGUCGCUUUGCACGGAGGGAGCUCUGCACGAAGUAACGUGUACUCGGCUCCCCAAACCGUGUUUCUCGGCGCCUGGGUCCCUGCCCUUUCC
rno-novel-mir-1495	chr13:-:98993619:98993726	AUCUGCUGCCCCCAGGACUGAGCAACACCAAGUCUUCUGCUUCUAGGGAUGACUCGCUGAGAAUGCCAGAGCACCCAGGAGAGUAGGAGACAGCUGCUGGUCUGGAUG
rno-novel-mir-1496	chr13:-:99047680:99047790	GUGGUGGCUAUUGUGCUAGCGUUAGGCCCUCCCACUCCCGUGCUGGCCAUCCGCCUCUGGAUGCCGCACUCCCUUGGGGUGGGAGGCCCGAGACCAGCUGGUCAAAUUGGA
rno-novel-mir-1497	chr13:-:99223815:99223922	AUUUAAUGGAAAUCUACAGUCUGUCCCCUGGCACUGAAGCCCAAGGACUUUGGUGCCCGGGUUCUGGCCUGCUUUUCACAUCGUUUAUGAGUGGGAAGUCGUAAGAAA
rno-novel-mir-1498	chr13:-:99495018:99495126	AAGGCUUGAGAGAAUCCUGUCAGGCCUGCCACAAGGCGCUAGCCAAUGUCUGAGCUGAAAAGUACCAAGACUUUUUGCACAUAGAUCAAAGUAGUGGAGAAUUUUGCCU
rno-novel-mir-1499	chr14:+:104190678:104190787	AGCCAGAUGUGUUCUUGUCUUCGGCUCCCGCCUCCUCCCUCUUGGGCUUCCUAAAACCCGGAGCCCCGGAGACAAGGAUUCGGAGCCCGACCAACGCAGUGCCAACCAUG
rno-novel-mir-1500	chr14:+:10447050:10447157	CACGUGACACACGGGCUGUGCUGCAGAGAGAUGGAGAGCUGAUGCUCCGUCACUUGCUUACGGCUCCAGACCCGCGGCACCAGCUCCGGUCUGCACCGAGGGCGGCUG
rno-novel-mir-1501	chr14:+:104494746:104494854	UAUUUAGGAAAUUCACCAUUUUCAAAAGCAGGUACUUUUAGUUUACUGGCUCUAGCUCUCCAUUCUUUAUAUUGGGCUGGAGUCAGUGUCCUUUAACUUUUGUAGAAUU
rno-novel-mir-1502	chr14:+:104786407:104786514	UAUCAAUCCAAUUAAAUGUCUUGAGCGAGCCGAGCGGGCGGUGCUCCCCGCCGCCGGCCGCCCCUGCUCUCGGCGCCCCGCUAUCCAUGGCUGGCUGGCUGUACUCCU
rno-novel-mir-1503	chr14:+:105929276:105929383	CAGUGGUAUCCACCCAACUCUCUCAACAAGGUUCCUGGGCCUGGCUUACAACUUCAAUGCCACAGUGGCCCAGAACCAGGAGGAGGGAGGAGGCGGGUAUCACUGUAU
rno-novel-mir-1504	chr14:+:106951328:106951436	AAACUAUUGCUUCUGGGGUUGGGGAUGUAGCUCUGUGGUAGAGCGCUUGCCUAGCAAGCGCAAGGCCCUGGGUUCGGUCCCCAGCUCCGAAAAAAAAAAAAAAAGAAAA
rno-novel-mir-1505	chr14:+:106951328:106951441	AAACUAUUGCUUCUGGGGUUGGGGAUGUAGCUCUGUGGUAGAGCGCUUGCCUAGCAAGCGCAAGGCCCUGGGUUCGGUCCCCAGCUCCGAAAAAAAAAAAAAAAGAAAAAGAAA
rno-novel-mir-1506	chr14:+:107126011:107126123	UUCCGAGUUUUUCCCCUGACCUUGCCAGGCUCCUGACCCAGGUUCAAGGAGGGCUGAGCUGGACAUAAAAUGUUUACAGUACAGUCUCUUCUUGUUCUCAUUCUCAGCAUUUC
rno-novel-mir-1507	chr14:+:107303128:107303235	GGGAUAGGCCCGGGCAGGCCAGACAUGGAGCUGCCGGACCCUGUUCGUCAGCGCUUGAGCAACCUCAGCCUCACCAUGUUCGGCGACUCCAGCCGUACCGGGCCAGAG
rno-novel-mir-1508	chr14:+:107303315:107303422	CCGGGUCAAAGAUGGCGGCCACGGCUUCAGCCAGGGUACUGUCCUGGGUUAGGAGACCGCGACCCUGUGGCGGACCCGGGAGACCACGAGCUUCAGUAGCCACAGCUA
rno-novel-mir-1509	chr14:+:107619138:107619245	CGCAUUGGGGAACUCUGCCAAGAUCCCAGCUUGGCCAUGGCAGGUGUGGGUGCCUGUGAGAUGUCCUGCUGAAUGGUGUAGACUGGAGUAGCUGGUGUCCCUGUAAAA
rno-novel-mir-1510	chr14:+:107749581:107749690	CCUUACGUACUGCGGAUAACCAGGCAACUGCGCAGGUCAGCCUUACGUACUGCGGAUAACCAGGCAACUGCGCAGGUCAGCCUUACGUACUGCGGAUAACCAGGCAACUG
rno-novel-mir-1511	chr14:+:107767364:107767472	CGGCACCACCGCAGGCCCCUUCUUCGGCUUCCGCCUUCUCUCCCGGCGUCGCUUUCUGGAAGGUUCGUGGAGGCGGCGGCCAGGGAGACCGUUACUCCACAGCAGGCCG
rno-novel-mir-1512	chr14:+:107767414:107767522	GCUUUCUGGAAGGUUCGUGGAGGCGGCGGCCAGGGAGACCGUUACUCCACAGCAGGCCGGAAUCCGUGUCCAUCGGUCCUCCUGAACCCGCGCAGACGCCAUCAAAGUC
rno-novel-mir-1513	chr14:+:108007420:108007527	GAAAACUCAACCGAGAUGGAAUCUCCCAGUCUGAACCGGUUUCAACCGGUUCCGAGUUUGAGGCACUAGGAGGAGGGGGAGAAGCGGCUGCAGCGGCCGCGGCAGGAG
rno-novel-mir-1514	chr14:+:108311134:108311242	UGUGGUUGCUGGAGAUUGAACUCAGGAGCCCUGGAGGAGCAGCCAGUGCUCCUAAGCGCUGAGCCUUCUCUCCAGCCCCAUCUUGCUUUUCAGAAACAGUCCAGAUCUG
rno-novel-mir-1515	chr14:+:108890406:108890514	AGAGAGAGAGAGAGCGCAGCUGGGGUGGAGGCCAGUUUCUGUUCCACCAUCACUACUGUUUCAAUGAAAAGCAGAUGGGCUGCCUCUGAGUCUGAGCUCCUUCUCUCAA
rno-novel-mir-1516	chr14:+:11199541:11199648	AUCCAAGAUCAACGCGAGCAAGAACCAGCAGGAUGACGGGUACCGCACGCUCCGCUCUUCCCCUCCCCCAGAGCCCCGCGCGCGCCCUUCGUCCCUCUGGAGCCGCGC
rno-novel-mir-1517	chr14:+:11273290:11273401	UAAAGUACUGCUAAUGGGUACAAAUUAAGGAAUUGCAGCAAAAAAAAAAUAUUGCCUACUAACUCUGACAUUAUACCUUGUUUGUACCCGCCAGCGGGAACUUCCUUGCAGG
rno-novel-mir-1518	chr14:+:114126969:114127079	GCUCGUCUGGGCGGCGGCGGCGGCUGCAGCCUGGGACAGGGCGGGUGGCACAUCUCGAUCGCGAAGGCAGGAGAAGCAGUCUCAUUGUUCCGGGAGCCGUCGCCUCUGCAG
rno-novel-mir-1519	chr14:+:114700313:114700420	GCGGGGAAAGGGGCGCGGGCACGGAGAAGCUGGGCCGCGGGAGCGCGCACACGCCUCCCGCACCCCUCAAGCUUCUGCGGCUCCUCCCAGUCGCGCGCCCUCCGCCCU
rno-novel-mir-1520	chr14:+:11680571:11680682	AAAAUCUGGGUUUGGUGGAACAUGUCAACUUGGUGAGGCUGAGCAAGGCAGAUCUCUGCAGCUCUCUGGCCAGCCUAGCUGAGUUGAUGAGCUCCACAUUUAGAGAAACCCC
rno-novel-mir-1521	chr14:+:11878465:11878575	CAAGUGUGCGCAUGCGCAUGUGUAUAUGUGUGCGCGUGCGCAUCUGUAUAUGUGAGCGCAUGCGCAUGUGUAUAUGGGUGCAUAUGCGCAAAACGAGAAAGUAAAUGCAAU
rno-novel-mir-1522	chr14:+:15692497:15692608	CUAGGUCGGUGGGUGGAAACUAGCUGGAAUGAUGUAAAAUGGCUGCAGAAAAAUUUUUCUGAGCCUUUUAUCAUUCCAGCCUAGUUCCUACCCACGACCUAGGCGGUUGCUG
rno-novel-mir-1523	chr14:+:15692499:15692608	AGGUCGGUGGGUGGAAACUAGCUGGAAUGAUGUAAAAUGGCUGCAGAAAAAUUUUUCUGAGCCUUUUAUCAUUCCAGCCUAGUUCCUACCCACGACCUAGGCGGUUGCUG
rno-novel-mir-1524	chr14:+:1596048:1596155	UCCCGCGGACCGGCUCUGGGGUCAUCCUCGACGGAGUCCUGGCCCACUCCGGAGCCCGGAAGCCCACGGAAUCCCCGGUUGGUCCAUUCAGGAGCCUGGCUUUCGGGG
rno-novel-mir-1525	chr14:+:1632500:1632608	AGUGCUCGCCCCGCCCUUCACCCCGCCCGGGCGGGCGGGAACCGCCGGUGCUGGCAGCCCGCAGCUUCCGCCCGUCGCUGCCCGCGCUCUGCGUCCCCGCGUUUCCUCA
rno-novel-mir-1526	chr14:+:1632576:1632683	GCUGCCCGCGCUCUGCGUCCCCGCGUUUCCUCAAUCAGGCCCUAGGGGAGCUCGCCUGCUCUGUGGAGGGAUGUGUGGGCCGAAGGGCCAUCGGAGGGCCACGUGGCG
rno-novel-mir-1527	chr14:+:1632626:1632733	CUCGCCUGCUCUGUGGAGGGAUGUGUGGGCCGAAGGGCCAUCGGAGGGCCACGUGGCGGAGCAGCCCUGGUCUUUACCGAAGAACUUCCUUUUCCUACGUCCUUAGCU
rno-novel-mir-1528	chr14:+:17111845:17111953	UUGUAGGGAAACGGGAAACAUUAGGACUAUGGUUUUCCCAGUGAUGUAUCUCAAUGAGGUAAGUCCUGAUAGAGAAGGAAGCCACGGGAUAUGUUACCUGUCCAAGCUC
rno-novel-mir-1529	chr14:+:17174019:17174126	GGUGUCUUCAAAGGUGUAAGAGGGACUGUGGAAGACUGCUGAUGAGUGUGGCUCCUUUCCAGGGCCAUGGACGAGGCAUCAAGGACGUUUUCCUGGGAAUUCUGCACC
rno-novel-mir-1530	chr14:+:17705445:17705552	GAUCNNNNNNNNNNCGGUGGUGGCGGCGGCCGCGGCGGGCGCUGGGCCGGCCUCGCGCCCUCGCGCCGUCGCGCCUGGCCCCUGCGUCGCCCCCGCCCGCCGCGGUGU
rno-novel-mir-1531	chr14:+:17887954:17888065	ACUGUGGCACUCCCAAGGUGUCCAUCAAGAAGCAGGCCAUGCAGAAUACAUUUUGCCUGUGCCUUUACUGCAUCCAAAAUGUACUCUACAGCGCCCAGCAUUCCUUUGUUAU
rno-novel-mir-1532	chr14:+:19300702:19300809	UCAAGUUUGUGAGCAGGCUGAAACUCGUGGCCAAAGGCUGAAGUUAAUCUCCCCCAAACAUUUAGAAAUGAAUAGUGAGGGGAGAACAAUUAUGGACUCAGCUUUUGA
rno-novel-mir-1533	chr14:+:19867198:19867308	ACUGGAGCCAGAUCUCAUCCUAGCGGGCCACCAGGCUGUACCCCACUUUUCGCGAGGGCGCUCCGGGCGCUCUGGCGAGAAGUUAGGGUCGCGGAUCCAGGAGCCCACAGG
rno-novel-mir-1534	chr14:+:2032639:2032747	CGCAUCCCGCCCCCCGCGCCCCCGGGCCCGGCCUGGGCGGGGCGGCGCUACCUGGGCGCUGGAGGCUGGGGCCGGGCUGGGGCGCGGGGCGCGCUGUCCGCGCGGAUAA
rno-novel-mir-1535	chr14:+:2048392:2048499	GGGGAGCCAGAGCUGGCGGAGAGGUGGAACGUUCCCGCAGAGGGCAGCAGUACCCGUGCAUGCGUGCAUGCUUGGGAGGGCCAGGGCGGAGAACACGGUCUACAAUCG
rno-novel-mir-1536	chr14:+:2048393:2048502	GGGAGCCAGAGCUGGCGGAGAGGUGGAACGUUCCCGCAGAGGGCAGCAGUACCCGUGCAUGCGUGCAUGCUUGGGAGGGCCAGGGCGGAGAACACGGUCUACAAUCGCCA
rno-novel-mir-1537	chr14:+:2075754:2075864	ACUCAAAGCACAGGAUCUGUUGCGGGAAGGGUAGCAUGAGUACCUAGAACCUGGACUCUGAGCCUCUUCCCCACAGGGUAGGUGUGGCCUACGUGUCCAUCCGUGUGAACU
rno-novel-mir-1538	chr14:+:2075754:2075866	ACUCAAAGCACAGGAUCUGUUGCGGGAAGGGUAGCAUGAGUACCUAGAACCUGGACUCUGAGCCUCUUCCCCACAGGGUAGGUGUGGCCUACGUGUCCAUCCGUGUGAACUCC
rno-novel-mir-1539	chr14:+:2081076:2081187	GACAGGUGUCGUGCACAUGGUGAGCAAUGGCAGGCUGGUGGGUAGGCCCCGUGGUACACCUUGGUCCCACUAGCCAGCUCUGCUUUUGUCUUACCCAGGGCCAGGUACAAGG
rno-novel-mir-1540	chr14:+:21067110:21067217	GGUUGCUGGGAUUUGAACUCAGGAGCUCUGGAAGACCAGUCAGUGCUCUUAACCACUGAGCCAUCUCUCCAGCCCAGCAAUUGAGUUUUAAUGCCUAAGAAAGUUCCC
rno-novel-mir-1541	chr14:+:2226543:2226650	UAGAGACCUCACAUUUUCUCUCUGAGGGAAUCACAGCCAAUAAACAGUGAUUUCACACCGCGUGGCUAUUCCUUCCGAGACUACCAUUCUCUCUGGGGGUGGAAGGGG
rno-novel-mir-1542	chr14:+:2438674:2438781	UCCCGCGGACCGGCUCUGGGGUCAUCCUCGACGGAGUCCUGGCCCACUCCGGAGCCCGGAAGCCCACGGAAUCCCCGGUUGGUCCAUUCAGGAGCCUGGCUUUCGGGG
rno-novel-mir-1543	chr14:+:2475126:2475234	AGUGCUCGCCCCGCCCUUCACCCCGCCCGGGCGGGCGGGAACCGCCGGUGCUGGCAGCCCGCAGCUUCCGCCCGUCGCUGCCCGCGCUCUGCGUCCCCGCGUUUCCUCA
rno-novel-mir-1544	chr14:+:2475202:2475309	GCUGCCCGCGCUCUGCGUCCCCGCGUUUCCUCAAUCAGGCCCUAGGGGAGCUCGCCUGCUCUGUGGAGGGAUGUGUGGGCCGAAGGGCCAUCGGAGGGCCACGUGGCG
rno-novel-mir-1545	chr14:+:2475252:2475359	CUCGCCUGCUCUGUGGAGGGAUGUGUGGGCCGAAGGGCCAUCGGAGGGCCACGUGGCGGAGCAGCCCUGGUCUUUACCGAAGAACUUCCUUUUCCUACGUCCUUAGCU
rno-novel-mir-1546	chr14:+:2624475:2624584	UUAUAUUACGCAUCAACAGUGUUAUGCUGGCUUCUGCACAGCUGUUGGUCUUGGCAAUGCAUUCUCACAAGCAGGUGUGAGGGACGGACAUACUACUGAAGAGAUGUGAU
rno-novel-mir-1547	chr14:+:3351345:3351452	CCUGCCUCAGAACCAGAGCGAGGCGGGGAGGGAGUGAGCAGAGCUGCUCCCGCCUCCUACCUGAGCACGUCGCGGCUGAGCUGCUCCGACACCACCGCCUUCAGCCGG
rno-novel-mir-1548	chr14:+:34367664:34367771	CUUUCUCAGUCAGCUCGGCCAGGAACCUGGAGAGAAACUAAUGUUCCUCAAACACACCCUCUGGCCAAGGCCAAGGGACUCUUCCCAUGGCCCUUCUGAUGGGAUCAG
rno-novel-mir-1549	chr14:+:3506365:3506472	CGAUGGGGGUGAUCCAGGCUUUCGGGGACGCCGAGCGCCACUUUCCUCCUCCCUGGCAGUGAGAGACAGUGGGGAGAGGAGAAAGCGGGCUGCUGUCCUUCCAGGCCA
rno-novel-mir-1550	chr14:+:35122971:35123081	UACAGCAUCCCUCAGCAGCGAGCUGUCAGCCUCUAGUACGGUCUGCACACCCGUCCUGUAGUCUUAGAGACCAGGGAUGCAGACUGUGCUCAAUAAACAGCAAGAAGGAGU
rno-novel-mir-1551	chr14:+:35122971:35123082	UACAGCAUCCCUCAGCAGCGAGCUGUCAGCCUCUAGUACGGUCUGCACACCCGUCCUGUAGUCUUAGAGACCAGGGAUGCAGACUGUGCUCAAUAAACAGCAAGAAGGAGUA
rno-novel-mir-1552	chr14:+:35122971:35123083	UACAGCAUCCCUCAGCAGCGAGCUGUCAGCCUCUAGUACGGUCUGCACACCCGUCCUGUAGUCUUAGAGACCAGGGAUGCAGACUGUGCUCAAUAAACAGCAAGAAGGAGUAA
rno-novel-mir-1553	chr14:+:35217751:35217859	GGAUUUAGCUCAGUGGUAGAGUGCUUGCCUAGCAAGCACAAGGCCCUGGGUUAGGUCCCCAACUCCGAAAAAAAAAAUAAGAAAGAACAGCAUCCAAAAGUUGAUAAGU
rno-novel-mir-1554	chr14:+:35584743:35584850	GACGAGAGCUUGUCUCUGUGGUACAUCCCAGACGACGACGAGGGCCAUAUACUUCUCAGCUCUCGGAAUAGCUGUAGAUGGACUGGACCACGGGGAAUCUGGUCUUCC
rno-novel-mir-1555	chr14:+:36686528:36686638	CUGGUCAGGGCUCUCUGGCCACGCCCAUGUCCUGGUCUCAUUUUACUUUUUGGGUUCCGGUGGAUGCCAUCUGGCUAGAACCCUGGAGAGAAACUUUAAAGUUGGACUAGG
rno-novel-mir-1556	chr14:+:36865948:36866057	GGCAAGCAGCUGGAAGAUGGCCGCACCCUCUCUGAUUACAGCAUCCAGGAGGAGUCAACCCUGCACCUGGUCCUCCCACUGAGGGGUGGCUAUUGAUUCUUCAGUCUGCA
rno-novel-mir-1557	chr14:+:37284967:37285074	AGAACCUAGGUUAAGCAUCCGAAACAAAGCGGGCGGAGGGACCCGGAGCCAAGCUGGGGGCCACAGGGACCGGUGCUCCCUGGUAGGCGGUCGGCCAGAUCCUGAUCC
rno-novel-mir-1558	chr14:+:37285017:37285124	AAGCUGGGGGCCACAGGGACCGGUGCUCCCUGGUAGGCGGUCGGCCAGAUCCUGAUCCUGCCCGUGCCCCGGUCGCGCCAGUUCUCAUCAAUCGUUUCCCAUCGCGGG
rno-novel-mir-1559	chr14:+:3817216:3817326	AGUCCCUUUGGCCUAUCCUGAACUGAAGCACCAUGCUGGAGUCCUGCCUCCAUUCCAGUUGCGUUUUUUAUGAGUUGGGGAUGGGGCUGCGGGGAGACUCUUAGAAAGUUA
rno-novel-mir-1560	chr14:+:39880067:39880174	CACACACACAGAAUCUCUUGGUUCUGUUUUUAUAGACAAUGUUGACUAAUACUAAUAUGAUGUUAAGAAUGGAGCUGGGGGAGGAGCCAUGUGAGGGGGGACUGAUAG
rno-novel-mir-1561	chr14:+:42220715:42220823	CGCGCCCAGUGGCAGCUGGAGAGUCGGAGGGCGGAGCCGGGGCUCCGGGGACCACGGUUCCGCCUCCCCGAGGCACCACGCGGCCAGUUGACCUCCCGGUCAAGAACGC
rno-novel-mir-1562	chr14:+:43144415:43144522	AAUUGAACCUGUGUCCAGACUCGGUUUUUAAUGGACUGCUUAGAAUAAAACAUCUGAUAUGUAGUACAUUAGUGAAGCUGAUGUAAUGUGACUCCAGGGGAAGAACCG
rno-novel-mir-1563	chr14:+:44548357:44548467	CCGUCUCCGUGGAUGGGGUUGGCAAACCAUCCGAGCACAGAAGACAUGGAGUGCUGGCAGUUGAUCACGUCCUCCAUGUUUUCUGUUCUGUUUGGUUCUAUCCAAUGGGAC
rno-novel-mir-1564	chr14:+:44548357:44548468	CCGUCUCCGUGGAUGGGGUUGGCAAACCAUCCGAGCACAGAAGACAUGGAGUGCUGGCAGUUGAUCACGUCCUCCAUGUUUUCUGUUCUGUUUGGUUCUAUCCAAUGGGACC
rno-novel-mir-1565	chr14:+:44584262:44584376	ACAUACAUACACACAUGUAUUUGGAGUGGGAUAGAUGGCUCAGCUGUUAAAAGCUCUUGUUGCUCUUAUAGAGGACCUGGGUUUGAUUCUGAGGAGCCAUGUGGAAGCUCACAAC
rno-novel-mir-1566	chr14:+:44584312:44584426	AAGCUCUUGUUGCUCUUAUAGAGGACCUGGGUUUGAUUCUGAGGAGCCAUGUGGAAGCUCACAACCAUCUGUGGCUCCAGUUUGAGGAGGAUUCAGUCUUCUGAGCUUCAAGGGC
rno-novel-mir-1567	chr14:+:44631637:44631751	ACAUACAUACACACAUGUAUUUGGAGUGGGAUAGAUGGCUCAGCUGUUAAAAGCUCUUGUUGCUCUUAUAGAGGACCUGGGUUUGAUUCUGAGGAGCCAUGUGGAAGCUCACAAC
rno-novel-mir-1568	chr14:+:44631687:44631801	AAGCUCUUGUUGCUCUUAUAGAGGACCUGGGUUUGAUUCUGAGGAGCCAUGUGGAAGCUCACAACCAUCUGUGGCUCCAGUUUGAGGAGGAUUCAGUCUUCUGAGCUUCAAGGGC
rno-novel-mir-1569	chr14:+:44939740:44939848	UGGGGUGUUUGCUAUUGUGGUUGUUUUGUUUUUUGUAAUUCUGUGAGGCCCUGGGAACUUUCGGUGUGGUAUGAGGAACGGAAGAGCUGUUGCCUUUGAAGGGGCCCUA
rno-novel-mir-1570	chr14:+:45288295:45288403	GUGAGAGCUUUCUCCACUUGUCUAUGCUUCCUUCCUUCUGGUGCUCAAGGAUUUGUAACAUCUUCAAGUCUGACAUCAGCUAUUGGGAGGAAGGUCUGAGCAGCAGGCA
rno-novel-mir-1571	chr14:+:46638383:46638495	CGCGUCGUCGGACGUUGGGACCCGCUGCCACGCGGGGGUCUUCGUCGGUUGGCGUCGGCGUCUGCCUCGGUUCUCUCUCGCGUCGGCUGGCGUCUCCUCGGGCUCCCGGGGGU
rno-novel-mir-1572	chr14:+:46638507:46638619	UUCGGGUCGGCUCGGUGCCGCGGGCGUGGCGGGACUGCUCCGGGUUGGGUGCAGUGUGAUUCCCGCCGGCUUGGCUCGCGUGCCCGGUCGCCGCCCGAGCGGCCUCCCGGUCC
rno-novel-mir-1573	chr14:+:46639042:46639152	CCGUCCGGCCCCGCCGUCCUCUGGGAAGGCGUGCGUCGGGGGAAAGCUGCCGGGGUGCCAAGGUGGGCGCCUGGGCGUUGAGUCGAACCCGUGUGCGCGUCCCGGUGUGGC
rno-novel-mir-1574	chr14:+:46639132:46639242	GUGUGCGCGUCCCGGUGUGGCGGUGGGGGCUCCGGUCGGUGUCUCUCCCCCUCGCUGCCCCGAGGCCCGGCCUCCCUUCCGACGCGGGCUCGGCCCCCCUCUCUCCCCCCU
rno-novel-mir-1575	chr14:+:46645412:46645524	UCGUGUGCACCGGGGGUGGUACGUGAUCUCUUCCCGGGCGGUGGCCGGGACGCGCUCGCUCUCCUCGAGGCGCCUGCCGCUCCUCCCCCGCCGCGGCUCUCCGGCACUGACGG
rno-novel-mir-1576	chr14:+:46681532:46681644	CGCGUCGUCGGACGUUGGGACCCGCUGCCACGCGGGGGUCUUCGUCGGUUGGCGUCGGCGUCUGCCUCGGUUCUCUCUCGCGUCGGCUGGCGUCUCCUCGGGCUCCCGGGGGU
rno-novel-mir-1577	chr14:+:46681656:46681768	UUUGGGUCGGCUCGGUGCCGCGGGCGUGGCGGGACUGCUCCGGGUUGGGUGCAGUGUGAUUCCCGCCGGCUUGGCUCGCGUGCCCGGUCGCCGCCCGAGCGGCCUCCCGGUCC
rno-novel-mir-1578	chr14:+:46682191:46682301	CCGUCCGGCCCCGCCGUCCUCUGGGAAGGCGUGCGUCGGGGGAAAGCUGCCGGGGUGCCAAGGUGGGCGCCUGGGCGUUGAGUCGAACCCGUGUGCGCGUCCCGGUGUGGC
rno-novel-mir-1579	chr14:+:46682281:46682391	GUGUGCGCGUCCCGGUGUGGCGGUGGGGGCUCCGGUCGGUGUCUCUCCCCCUCGCUGCCCCGAGGCCCGGCCUCCCUUCCGACGCGGGCUCGGCCCCCCUCUCUCCCCCCU
rno-novel-mir-1580	chr14:+:50278369:50278476	UCCAGCUUCUGACUAUUAUAAGGAAGGCUGCUAUGAGCAUAGUGGAGCAUGUGUCCUUGUUAUACGUUGGAGCAUCUUUUGGGUAUAUACCUAGGAGUGGUAUAACUG
rno-novel-mir-1581	chr14:+:59486425:59486532	GAAUCUUGCUGCUCCAGCUGGUCUUAAUCUCACGAGUGUAGCCUGAGGUACAACCCUCAGUGUACAACCCUGCUGCCUCGGCGGUCUAAGGCUAGGCUUCUAGGUACU
rno-novel-mir-1582	chr14:+:61307600:61307709	GGUGCAUAAAAGCAGGGCAUUUGCGGGAGCGAUGUGUUUCCCUUUGAGUACAAGUUGCAUUUGCUAGCUUUACUCUGGGUGAGAUGGUCCCCGAUUGCAGUGGCUGUCCC
rno-novel-mir-1583	chr14:+:63014294:63014401	GACCUUAGCAACUAGCAAAAGAGGUAAUUAUAAACAUACGCAACUAUACAGUUGCCAUGCAUUGUAUAGUCGCUGUAUAGUACGUGAGACCUCACCUCCAAGAUCCUC
rno-novel-mir-1584	chr14:+:63157133:63157244	AAUGCUAUCAUAUACAUCUGUAUAUCAUCUAUCCAGCUACUACAUAUAUAUGUACACACAUAUACAUACAUAUAUAUGUUGUAGCUGGAUAGAUGAUAUACAGAUAAAUAUA
rno-novel-mir-1585	chr14:+:63157133:63157245	AAUGCUAUCAUAUACAUCUGUAUAUCAUCUAUCCAGCUACUACAUAUAUAUGUACACACAUAUACAUACAUAUAUAUGUUGUAGCUGGAUAGAUGAUAUACAGAUAAAUAUAG
rno-novel-mir-1586	chr14:+:63157134:63157245	AUGCUAUCAUAUACAUCUGUAUAUCAUCUAUCCAGCUACUACAUAUAUAUGUACACACAUAUACAUACAUAUAUAUGUUGUAGCUGGAUAGAUGAUAUACAGAUAAAUAUAG
rno-novel-mir-1587	chr14:+:63190221:63190332	GGGGUAAAGUGUUUGGGUCAGUUGAAAAAAAGGAAACCUUUUCAUGCCUUUAGAUGUGAGCUAACAGUAGGCAAUGAUCAUGUGUCCUUUUUUGAUGGCUGUACCGAGAACU
rno-novel-mir-1588	chr14:+:65402094:65402206	AAAUGCAUGCACUCAAUUUAUUUUUAAUUGGGGUAGAAUCAGAAGAUAGGUGUGAAAUGUUUAUUAAAGCAUGGAGAAUUGAUAUAGCAUCUUAUUUUACCCCAGAGAGAAAA
rno-novel-mir-1589	chr14:+:65855007:65855119	AAAUGCAUGCACUCAAUUUAUUUUUAAUUGGGGUAGAAUCAGAAGAUAGGUGUGAAAUGUUUAUUAAAGCAUGGAGAAUUGAUAUAGCAUCUUAUUUUACCCCAGAGAGAAAA
rno-novel-mir-1590	chr14:+:6715212:6715320	AUUUGGAGAGUGGGAGGAAGAGCCUUGCAGCAAUUUCUCCCUCAGAGAGUCCCCCAAGGGGACAGCUCUUGCAGGGAGAUAAGCUGGUAAGAUGGCUGUGAACAGACUC
rno-novel-mir-1591	chr14:+:6994229:6994340	GUAUGCAGCAGAAUUAGCUCUCUCCCUCUGGGUCUGCGCUGCCUGCGAAGCUCUGCAGCACGGAGCCAGCGAGGGAGGGAGAUCCAGGAAUCCGCAGCAGAAACCAUGACAU
rno-novel-mir-1592	chr14:+:7012342:7012450	UUCCCUGCUACUGUGUCCACUCCCUUUGUGGAUUCUGACCAACCUGCAAAUAUCACAAAGGGAGAGGAGAGUCAGGAGCAACCUGUAAGUGACUCGCACCAGCAACAGG
rno-novel-mir-1593	chr14:+:7021273:7021384	AUGAUACACACAUCUACACUCAGCAACACACAGACACAUACUUGUGAAAAAGUAAAUAAAAUAGUAUUUGCUCUGUGUGUCUGUGUGUCUAUGUGUCUGUGUGUAGAGGCCU
rno-novel-mir-1594	chr14:+:71986273:71986381	UGUAGUCGGCCUUUCUUCGGAGUCCCUGUUCGGGCGCCACUUGUCCCCGACAGCGGGUACCCAGUUAUUCAGGGUCCCGAAGAGGCUUUCUACCUGUGGGCCAAAAUGG
rno-novel-mir-1595	chr14:+:72259338:72259446	GAAAUUCAAAUUGUGGCCCAGGCUAAGGUGGGGAUUUAGACCAUGCUAGGGGCGGAGCUUACGGAAUAAGAUGGCGGCCGCCAGGGCCUUGUCCCUAACUGUUGAGGCG
rno-novel-mir-1596	chr14:+:72259388:72259496	GGCGGAGCUUACGGAAUAAGAUGGCGGCCGCCAGGGCCUUGUCCCUAACUGUUGAGGCGUUCGGGGCCCCCAUUCCUAGGCGCCAGGGAAGGCUCCUCGCCGCCUUUCC
rno-novel-mir-1597	chr14:+:72380168:72380275	CGGAGAAGCCGGUGACAGGCAACGGCGGCGGCGACAGCGGGCCGAAGGGCGUGGCGGACGGCCCGGCGGCGAAGGGCCGGUAGGCGCUGCCGCCGGGCGAGGACCGGG
rno-novel-mir-1598	chr14:+:72956110:72956221	CAAAAUAAUGACUGAGCCAGGUGUAGCCCUACACACCUGUAAUUCUGGUGCUCUAGAAUGAGAACAGUGAAAACAGAGUAGGGGUAGUAGGAGGCUAGCUAUACUUGCUGGU
rno-novel-mir-1599	chr14:+:7444798:7444906	AGCAUUUCAUCAGCUCCUUCCUCCAAGGUUCCUGCAUUCAGCAGUUCUCUUAGUCAUGCUGGCUCAGAGACUCGGAGGUGAACCUGGAGGAGGGAGUGCUCGCUCUCAG
rno-novel-mir-1600	chr14:+:75884344:75884454	CCUUUCUCUUCCUAUCCUCCACAGAGAUGACAUGGAGCACUGAAUAAGCCAGUGCCCAUCAUGUCUGCUGCUUACAGAUGUGGAGACAAAGUCCACAAUAUGCAUUAAAAU
rno-novel-mir-1601	chr14:+:77020478:77020587	UUAAGAGUGACUGCUUUCUGUCUGCCUACAGGAUGGCAAUGUGCGUGUGUACUCCAUCCUGGGUGCCACACUAAAGGAUGAAGGCAAACUCCUAGAGGCCAAGGGGCCAG
rno-novel-mir-1602	chr14:+:77383209:77383319	AUAUUCUCCCUCCAGAAGUGCUGGGGGUGGUUGGUUCUCUCCUAGCCCAUAGCCACUGCUGGGCACCUGCUCUGGGGAGUGAGUUUGGGGAUUAGAGGUUGGUAACUCCUC
rno-novel-mir-1603	chr14:+:77383210:77383317	UAUUCUCCCUCCAGAAGUGCUGGGGGUGGUUGGUUCUCUCCUAGCCCAUAGCCACUGCUGGGCACCUGCUCUGGGGAGUGAGUUUGGGGAUUAGAGGUUGGUAACUCC
rno-novel-mir-1604	chr14:+:77383259:77383369	AGCCACUGCUGGGCACCUGCUCUGGGGAGUGAGUUUGGGGAUUAGAGGUUGGUAACUCCUCGACCUCACUCUCCCCGUGCAAGGGAAGCAGAAAGGCAAUGGAUCUCCAAC
rno-novel-mir-1605	chr14:+:77383259:77383370	AGCCACUGCUGGGCACCUGCUCUGGGGAGUGAGUUUGGGGAUUAGAGGUUGGUAACUCCUCGACCUCACUCUCCCCGUGCAAGGGAAGCAGAAAGGCAAUGGAUCUCCAACA
rno-novel-mir-1606	chr14:+:77383260:77383367	GCCACUGCUGGGCACCUGCUCUGGGGAGUGAGUUUGGGGAUUAGAGGUUGGUAACUCCUCGACCUCACUCUCCCCGUGCAAGGGAAGCAGAAAGGCAAUGGAUCUCCA
rno-novel-mir-1607	chr14:+:78457109:78457216	GCCUGCAGUCGCUGCAGCUCGCCUUCCUUGAUCUUGGCGGUCCGCGCUGCCUCCUGCUCGUGCUGCCGGAUGAGCGCCUCGCGCAGCGCCUGCAGUUCCUUCGUCUUC
rno-novel-mir-1608	chr14:+:78739788:78739896	GAAAUAACCCCGCAGCAGUGGCUGCUAUUCUUCCCUGCUGAGGAAGCACUGGGAGAGAGAGAAUGGAAGAAGGCAGAGCUCACGCGGGACACUGUGGAAACGGAGGCUU
rno-novel-mir-1609	chr14:+:78878562:78878670	GAAAUAACCCCGCAGCAGUGGCUGCUAUUCUUCCCUGCUGAGGAAGCACUGGGAGAGAGAGAAUGGAAGAAGGCAGAGCUCACGCGGGACACUGUGGAAACGGAGGCUU
rno-novel-mir-1610	chr14:+:79076187:79076298	CCCUCCAGAAGAUUAGCAAUCUUUCUCAACUGCUAAGUCAUCUCUCCAGCCCAUAAAACUUAUUCUUAUUUGGGGGUGGAGAGAUGACUCAGUGGUUAAGAGCACUAACUGC
rno-novel-mir-1611	chr14:+:79272028:79272139	CCCUCCAGAAGAUUAGCAAUCUUUCUCAACUGCUAAGUCAUCUCUCCAGCCCAUAAAACUUAUUCUUAUUUGGGGGUGGAGAGAUGACUCAGUGGUUAAGAGCACUAACUGC
rno-novel-mir-1612	chr14:+:79343465:79343579	GGGUGGAGUCUGGCGCUAGCUGCUUUUGGCCGCGGGCCGCUGACAGGCACCUGCUGUGGCCCGGCGUCUGCAGUGUCUAGCCUCCUAGCCCAGCAAGUUGCCGGCCCCACGGGGC
rno-novel-mir-1613	chr14:+:79635762:79635869	CAGGUGACAGGCUGGGAUUCAAACCCAGGCAGUCUGGCUCUAAAGCCUGUUCCUUUUCCACUAAGCCAGGCUGCCUCGGUGUAGUCCCCGGUGUUGGUGCCGGGCUCU
rno-novel-mir-1614	chr14:+:79640980:79641090	CAAGCCUGGAGACUCUGCAUUUUCCCAGAGGCAGGGUAUGUGGCUGAGUUGUGCAUAACACACAUGCCCUGACCCAGGGAGCAGCAGAGCCAUCCUCUGCUCAUGGGAAUA
rno-novel-mir-1615	chr14:+:79640981:79641091	AAGCCUGGAGACUCUGCAUUUUCCCAGAGGCAGGGUAUGUGGCUGAGUUGUGCAUAACACACAUGCCCUGACCCAGGGAGCAGCAGAGCCAUCCUCUGCUCAUGGGAAUAU
rno-novel-mir-1616	chr14:+:80169643:80169750	GACUGGUGGUAGCGCAGGUACCCUCCCGCACCUGCUCCUAGAGCUCUGCAGAGCUGUCAACACGGUCUAAAGGAGGUGUGUAGGACUGUAGCUCAUCUCAGCACUGGA
rno-novel-mir-1617	chr14:+:80711152:80711260	GGGAGACAGAAUAUCAUGGUGGGGUGGAGCUGGGGAGGGAGGGGCUGUAUAGGCUGAGGUUCCAUCUUCCUGCAGUUUCUCUAUCCUGGGAAACAAGGAAAAGGUCAAG
rno-novel-mir-1618	chr14:+:80711375:80711483	GGGAGACAGAAUAUCAUGGUGGGGUGGAGCUGGGGAGGGAGGGGCUGUAUAGGCUGAGGUUCCAUCUUCCUGCAGUUUCUCUAUCCUGGGAAACAAGGAAAAGGUCAAG
rno-novel-mir-1619	chr14:+:8100227:8100335	AGCAUUUCAUCAGCUCCUUCCUCCAAGGUUCCUGCAUUCAGCAGUUCUCUUAGUCAUGCUGGCUCAGAGACUCGGAGGUGAACCUGGAGGAGGGAGUGCUCGCUCUCAG
rno-novel-mir-1620	chr14:+:81426793:81426903	CUCAGGCUGAAGGCCGCGUCACUGUGAGAGUAGCGGUUGCUUUGACCACUGUAAGGUACAGGACCCGGGGCUGGUGCGCCUGCUCACAGGAACGCUGGUUCUCCCACCGAG
rno-novel-mir-1621	chr14:+:81504714:81504825	AUUCUGACUUGCUUGCACCUAAAGUUGUGCUACUUGCUGGAAGGGGAAGUUGCUGUGGGAGCAGCGUGUCCUCUCUCCAGGGUGGUAGCUCCAUCCUGUUGAGUAGGUAGGU
rno-novel-mir-1622	chr14:+:81818508:81818615	GAGGAGUCCGGGUAAUUAGGGCUUAGAGUGACCAAGACAGCCAGGAGCUUGCUGAAAAGCUCACUCUCUUAUCACCAUAGCCUGGCUCUUGGAAUGGCCCUACCCUCA
rno-novel-mir-1623	chr14:+:82056143:82056250	CUCUUCCAUGAGUUUCAAAAUUUGAGGCUCUAGUUUUAUGCUUGGGAGACCCUCGGUGAUAUAUUCUGGGAAAUAUAUUGGUCACCGGGAUGCCAAGUUAGACAGACA
rno-novel-mir-1624	chr14:+:82244810:82244919	UGUGUAGGUAUGUGUAUGUGUGUGUGUGUGUGUGUGUGUGUGUGUGUGUGUGUGUGUGUGUGUGCGCGCGCACGCACGCGUGCACGCACGCGAGCCUGGUAUCCUCAGAG
rno-novel-mir-1625	chr14:+:82285986:82286096	AUUGUUCCAGGAGGCUCCAGCCGCUGGAGAGAGGGGCGCGGGGGCGCGGGAGGGGCACACCGCCAUCUGCCUCCUCCCGCUGCGCCCGCCGCACUCGCACCUCCCCGAGAG
rno-novel-mir-1626	chr14:+:82356902:82357009	GUGCUGUCGCUGGGUGAGGUUCCUGCUGGUGAGCUCUCCUUCAAACCACCGCCGCCAUGGCCUGCAGACCUAGAAGCCCACCCCGUUACGGGAGUCGCCGCGACGGCG
rno-novel-mir-1627	chr14:+:82357175:82357282	GCGGACGGAAGAGACCGGAAGCCUGAGGACUCCGAGGAAGGCGAGCUCCAGACUGCAGACCAUCGACCUGAAAGGUGGGCCCCGACUCGGUGGGAACGGGUGGGUCAC
rno-novel-mir-1628	chr14:+:82405666:82405773	GGAAGCCUGUGUCGCCCACCGGCCCUACCUCACCGAUGACGCCCCGGCCAGCUUCAGCCAGCAGUGGCUUUGUGGAUGGCAGUGAGGGCAGUACGAGCUCAGGUCCAC
rno-novel-mir-1629	chr14:+:82405716:82405823	GCUUCAGCCAGCAGUGGCUUUGUGGAUGGCAGUGAGGGCAGUACGAGCUCAGGUCCACCCUGGCUUUCUACAGGACCCUGCCCAUUUUCCUCCAGGCGCCGACUGUCC
rno-novel-mir-1630	chr14:+:8253234:8253341	UUAGGAAUCGCUCAUAGCUCAGCCACAUCAUUUAGACUUUGUCAGCUCAUAGGGGUUUGCUACCGUCGUAGGCUGGAGGCUGGGAGUGUCCGGGUGGAGUGCCAUCCC
rno-novel-mir-1631	chr14:+:82658984:82659091	GGGAGGGCCCAGCAAGUUCUUAAAGGGGAGGUGGCUUUGGGUCAGGAAUUUGAAACUGAGGUGCAGAAAGAAGUUUUGAUCGGGGGAUCAGUUCCUUGGCCACCAGGA
rno-novel-mir-1632	chr14:+:82799951:82800063	AGCUGCUUCUCCUGCCAAGUAAGGACACACAGUACCCGCCACUGUCCUAAGAGUGAGGUGGAGCAUGUGUGGAUGCCUUGGCUGGGGACUAACACUGGAAAACAACUCACUAC
rno-novel-mir-1633	chr14:+:83062604:83062712	GCGACUAGGGCCGCGCUGGAGAGCUGCGCAGGCGCCUUAAGAGUGCUGCAUUUUACCGCCGCAGCGUUGAAGGGUGGGGAGCGGCUGGGGCGCGGCGAUGGUGGUUCCA
rno-novel-mir-1634	chr14:+:83338259:83338366	AAGAUGCUGGGGGGUGUGGGAAGUACAGGCAGGAUUUGGGGGUGGCUCUGGGCUCCCAGCAUGCAUUUUUCCUGUGCUGCCUCAGCCUGGGAGAGGGAGGCAUCCUUC
rno-novel-mir-1635	chr14:+:83346711:83346822	CCUCUUUGGGGAAGCACUGGGCUCCCUCUAGUCCUCUUGGUUGUGGCUGCCAAGGGAUCUUUCCACACAAGAGCAUGAGGGUCUUCAGUGGAGCCCCAGGCACUGCGGGACU
rno-novel-mir-1636	chr14:+:83346711:83346824	CCUCUUUGGGGAAGCACUGGGCUCCCUCUAGUCCUCUUGGUUGUGGCUGCCAAGGGAUCUUUCCACACAAGAGCAUGAGGGUCUUCAGUGGAGCCCCAGGCACUGCGGGACUGA
rno-novel-mir-1637	chr14:+:83346712:83346823	CUCUUUGGGGAAGCACUGGGCUCCCUCUAGUCCUCUUGGUUGUGGCUGCCAAGGGAUCUUUCCACACAAGAGCAUGAGGGUCUUCAGUGGAGCCCCAGGCACUGCGGGACUG
rno-novel-mir-1638	chr14:+:83476768:83476875	CUCGGGCCAGCUUCCCGGAGCGCGCCGAGGGUCGCGCGCAGCUCGGCCCCACCCCGCCGGACCUGCGCUCGCCUGCGCUCGGCCUGUCGGCUCCGUGCAAAGCGUGCG
rno-novel-mir-1639	chr14:+:83509380:83509489	GUACGCAAGGCAGGCUGGGGGGCUCAGAUCCACUGGCUCUGGCCGCCCCUCCCGCACGCUCGCCUACACUCUGGGCGGGCAUCGGAGGGGCGGCUGUAGCUGGUUCGCUG
rno-novel-mir-1640	chr14:+:83510312:83510425	CCGCUUUUGCCGGAGGGGCGCACCUCUUCGCUCGUUUACCCCCUGGAAGGUAGACCUAGAGAGGGAGGCGGGCAGGCGGAGAGGGAGUGCUACGCGGGUCCGGGGUAGGUUAAG
rno-novel-mir-1641	chr14:+:84359507:84359614	CCUAGAGUGAAAACUAAUCCUUGCCUUUCUCCCUGGGGCCACCGUGAUAAUUCCCAGUGACAUGCUGGGAAAGUGGUGAAUGUACAGGGGGAGGUAUCAUCAUCAUCA
rno-novel-mir-1642	chr14:+:84912074:84912183	UGUGGGCACAUCAGGAUCCCUUCCGGCAUGGCCCCACACAGCCUAGGGGAAGGGAAGCUCAUGACUGAAAUGCUGUCUUCUCUUCCUUCCACAGCCAGACCAUUUCAUUC
rno-novel-mir-1643	chr14:+:84977636:84977744	AGGGAUCAGGAUGCGGGCGCUCCGGCGGCGGGCGCGGGGGGCAACAGCUCGGACACCCCACUUCAGCCCCCGCCGCCUUGCCGCACCGUCACCGCCGGCCACGCGGCCC
rno-novel-mir-1644	chr14:+:85126984:85127093	CAGAAAUGUAGGUCACGAGGCUAAGGGAGCAUGGGAAUUAUUGCGGUUCCUGGGCCUCCACAUGUCCCUCUCAACUCCUCUGUCCUGCAGAUUCUAUUCCAAGGACAGUG
rno-novel-mir-1645	chr14:+:85134572:85134685	GGGGAGGCUCCCACCCUCCGUGCUGAGGGAGGGAUCAGGUAGGUUCUCUUAAGAAUGAGCCUGUGCCUUUCUCACAGCCUACAAAGAUCUGCAGUCUCGGGAGGAGACUCGAAA
rno-novel-mir-1646	chr14:+:85134575:85134685	GAGGCUCCCACCCUCCGUGCUGAGGGAGGGAUCAGGUAGGUUCUCUUAAGAAUGAGCCUGUGCCUUUCUCACAGCCUACAAAGAUCUGCAGUCUCGGGAGGAGACUCGAAA
rno-novel-mir-1647	chr14:+:85190695:85190802	GCGCCGACGUCACGUCGCACUUGAGGGCGUCCCGAGCCUCGGCCUGAGCCUGCGCCUGCGCGGCACCGCAGCCCUGAAUCUGACCGAGCAGCUCGCCCACCUCCUCCU
rno-novel-mir-1648	chr14:+:86108240:86108350	GAAACUAGCACCUGGGGGCAUCUGAGAGGGGCUGGCGUUCCCUGCCUUUUCCCAUAGAACCCAUGAGGGGAGCAGGUGACGUCAUCUCUCCUCUCUGCCAGCUGAUGAAGG
rno-novel-mir-1649	chr14:+:86387612:86387723	GCACGCGUAGGGCGGGACAAGUCAAUAACCAAUCAACUCUGGAGGAUACGUCACUUCCUGGAAGUUUUUCUUCCGGGAGGUCCGACGUUUCCACCAACUUGUGCUUCUGGCU
rno-novel-mir-1650	chr14:+:86434328:86434437	AACACCAAUGCUGGAGCCCCACCGGGCACUGCCUACCAGAGCCCCCUUUCCCUGAGUCGAAGCUCCCUGGCUACCAUGGCUCAUGCACAGUCCCUGGUGGAAGCACAGCC
rno-novel-mir-1651	chr14:+:86481305:86481417	GCAAAUCUGAGGCCUGGACACCCAGCCUGACUAUGAGCCUUGAUCAACACAGGUCCUCAUUUUCUAGGCUGUACCAACCCAAGCCUGAGCCUUCAAUGGCUCAUUCCUCCUGC
rno-novel-mir-1652	chr14:+:86527606:86527718	GGUUGAAACCUCCUGACAGCUGAGUAGGGCAGCAGGUGCUAGGCGUGUGGCAAAUGACCAGUACCCAUCUGUCCCUGCUUAGCUCAGACUACGAGGAGAUCACCAUCGACCCC
rno-novel-mir-1653	chr14:+:86530035:86530148	CACUCGUCCUUCCACCCUGCCUGCUCCUACCCAGCCUGCAUCUUGUCCAGCACUGAUCCUUCUGUUUCUGCUGCUCCUCAGAAGAGCUGGCUGGUCGGCUGGCUCUGUACCCUU
rno-novel-mir-1654	chr14:+:86614365:86614477	GCAAAUCUGAGGCCUGGACACCCAGCCUGACUAUGAGCCUUGAUCAACACAGGUCCUCAUUUUCUAGGCUGUACCAACCCAAGCCUGAGCCUUCAAUGGCUCAUUCCUCCUGC
rno-novel-mir-1655	chr14:+:86659324:86659436	GGUUGAAACCUCCUGACAGCUGAGUAGGGCAGCAGGUGCUAGGCGUGUGGCAAAUGACCAGUACCCAUCUGUCCCUGCUUAGCUCAGACUACGAGGAGAUCACCAUCGACCCC
rno-novel-mir-1656	chr14:+:86661753:86661866	CACUCGUCCUUCCACCCUGCCUGCUCCUACCCAGCCUGCAUCUUGUCCAGCACUGAUCCUUCUGUUUCUGCUGCUCCUCAGAAGAGCUGGCUGGUCGGCUGGCUCUGUACCCUU
rno-novel-mir-1657	chr14:+:86803550:86803657	UAGUAAUCCGGGUGACAAAGCUAGGGGCUGGAACCGGAGGUAGCCAGGGCAAUUCAGGCUGUGCCUUCGGGGCCGGCGCCCAGGCUGGGAAACACGUGGGCGCGGCGC
rno-novel-mir-1658	chr14:+:86803552:86803659	GUAAUCCGGGUGACAAAGCUAGGGGCUGGAACCGGAGGUAGCCAGGGCAAUUCAGGCUGUGCCUUCGGGGCCGGCGCCCAGGCUGGGAAACACGUGGGCGCGGCGCCC
rno-novel-mir-1659	chr14:+:86813052:86813159	GAGCAUGUAGCGGCCGCUGGCGGUGGGGCUCCCGGGGCGGGCCGCGGGGGCCGCACGCGGCGACAUGGAGGAGGAGGGCAAGAAGGGCAANNNNNNNNNNNNNNNNNN
rno-novel-mir-1660	chr14:+:86813322:86813429	NNNNNNNNNNNNNNNNNNNNCUCACCGGCGCGUCCUCCCGCCGGGCCGGGGCGUGGGGUGGGGGGUCCCUCGGGGUGGGCGGGCGGCGGAGCGGGCAGGGACAGUGGU
rno-novel-mir-1661	chr14:+:86813372:86813479	GCGUGGGGUGGGGGGUCCCUCGGGGUGGGCGGGCGGCGGAGCGGGCAGGGACAGUGGUCAGGUGGGCCUGCGGCUCCCGGAGGAAGUGCCGCGCCUUUCCGGUAGGGG
rno-novel-mir-1662	chr14:+:86926665:86926772	GAAAGAGUGAUCCAAGCAUGAUGGCAGAGAAUGGGCUGUGUGUGUGUCCUGUGGGCAACGGGCCUGCACAUCUGAAUGCACACACAUUCUCUCCUGUUCAUUCUUAGC
rno-novel-mir-1663	chr14:+:88897876:88897987	GAGUUCACCCAGGAAGGUCCCAGAAACCAGAACAAGGAAACCAGUCAGUGCUCCAGCUGGGAAGGGGUUGGAGCACUGACUGGUUUCCUGGAGAUAUGACUACAACCCACGA
rno-novel-mir-1664	chr14:+:89208545:89208652	CCGGGCGGAAAGAGGAGUGAGUGAGGGCAGCAAAGGAAAGGUCCCCGUUAACCCUCCUUCCCUCUUAGAGCCGCCCUCACCCCGCCAGUCCUCUCACAGGGGCUGCAG
rno-novel-mir-1665	chr14:+:91555956:91556063	ACCGACGGACACGCCGCCACUUCCGCUCGGGUGAUCUGCGGGAGGUGUCCUAGCUUGGGACCCCUCUUGGGUACACAUGGGAGGCAAGAGGUCGAUCCCCCUAGGGGA
rno-novel-mir-1666	chr14:+:91556305:91556417	UAAAGUUCCUGGCUACAGUAAUGCCAACGGCAUGAAGUUCCUGACUGCUGUAAUGCGAAUGAUUGUGCAUUAUCAGUGUGUGGAACUUCAUGGAAAAUACAUGCAGUGAACAC
rno-novel-mir-1667	chr14:+:91783195:91783302	UUGCGGUCUGCAAGCGGGACCCGGCGGCGGGCGCGGGGACGGGACGGUGUCUCCCUGUGCCCGGCUCCGCAUCGCCGCCGGGGUCCCGAAGCCGCGUGGCGUGAGCGC
rno-novel-mir-1668	chr14:+:99529212:99529319	CCCGCGGAACGCUUGCCUGCCUGUCUAGGUUUUGGGGCUCUGGGCUACACGGAUGUGCCCUAUUCCCUUGGCAUGAUGGGGAUCUUUUUGGCGUCUGUUGGAUUUAUG
rno-novel-mir-1669	chr14:-:100070580:100070687	AACACAAUGGACAUAGGGCAAGAGGGUGGACCUGAGACCUGUGGCUUUCCCAGAGGAUUUGGAAGAAACUGGAAGGCAAGGGUUAAAUCAGAGAUGCCUCUGGUCUAG
rno-novel-mir-1670	chr14:-:100070630:100070737	UCUUGUGAUGCUAGCACAGCACUGUCUACCACACAUGCUGUCCGCUGACCAACACAAUGGACAUAGGGCAAGAGGGUGGACCUGAGACCUGUGGCUUUCCCAGAGGAU
rno-novel-mir-1671	chr14:-:100217240:100217349	UCUUGUUUACGCACCACAAUCCCCUUCAGCAGGACUGACGUUUAGGCUCCUCCUAGAACAGCACCGGAUGCGAGGAGGAUGGGGCGGGCAGGCACUGGGGCCAAGAUUAG
rno-novel-mir-1672	chr14:-:100322999:100323106	CCUUGCAGCUUUCAGAGGCCCGGGAGCGCGCAGGGCCGGGGGGCGCGCAAGUGUCCGAGGACUUGAAACCCGGCACCUGCACCCGCCAGGCCUCUGGAAUUUUCUACC
rno-novel-mir-1673	chr14:-:100515340:100515447	AGAAAGGAGGAGGGCGCUCCAGGCGACAGCGCUGCAGACGCCAUUAUCCUCUGCUUCUCCACUGCACAGAUGUCGCCCUCAUGCUCGUCUCCCACUCGAUUGCGGCCU
rno-novel-mir-1674	chr14:-:103062034:103062143	ACUGCCUUUUGUCAGACAUAUUUCUAUGUGUAGGGUGGAAAUUCCUGCUAAAGGAAAAUUGGCAGGGAAAUGUAUCAUAAUGCAAGAAUGCUAGUGUUAGUGGGAGGAAA
rno-novel-mir-1675	chr14:-:103264277:103264386	AAACUCUCAGACAGUUUGCUUAAAUAUUGGGAAGGCGGCAAGAUGUGGGGCACGCAGUGGCACUGUCGAGAAUGUCACUGUGGUCCCAGGCAAGUGCAGUGUUGCUAGAG
rno-novel-mir-1676	chr14:-:104190473:104190585	AGCCAGAGAGUUUGGUUUUGGAGAAGCAGAGUGUGGGAGGGGGUUGGGGGGGCAGUGCAGGUGGCCUCUGUUGGCCUCCCCAUCCCAACUCUGAUAGAAACCUUGCAAGGAGA
rno-novel-mir-1677	chr14:-:104340075:104340182	GUACUUUGACUUGGUAGGGUUUCUUCUUUUGGUCUGCCCGGGACUGUUUCCAUGUGACAGAAAAAAAGCAAGCCUAGAGGCUUAGGGGCUGUUUGCCCCUUAAGUCAG
rno-novel-mir-1678	chr14:-:104375352:104375459	GCGGGCGGGCUCUCGAGGGACGCGGGCUCGCGGGAGGACGUUCGGGGGGCGCCGGCCGGCCCUGAGCCGGUGUCCCGGAGCUAAGCUACCCCGCAGUGCACCCGAAGG
rno-novel-mir-1679	chr14:-:104612595:104612702	UCCGGCCCCGCCCUCCUCCCUAAGCUGCAGCCUCCAGCGCGCCUCCAGCGUUGCAUCAUCCAGCCAGCAGCGGCUCUGAAGGAAGGCUGGGCGCGGCACGGUCUACUC
rno-novel-mir-1680	chr14:-:104786015:104786122	GUGGGGAGAGGUGGGUGGACGUUGAGCAGGGGGAGGAGAAAAGGAGCCGCGGGAGACCCGCGGAGUCACUCUGCCCUCCUCGUUCUAGAAGUGAGCUUUCCGCCAAUC
rno-novel-mir-1681	chr14:-:106086230:106086337	GUGACAGCAUCUCCUCCAAGCCAGACUGGGAGCUGCUCCCUGCCUCCAAGCCAACGGCUGUUUGCACUGCGUAGGGUAACUUGGUUUCCCAGCUCACCUUUGGAGAAG
rno-novel-mir-1682	chr14:-:106393529:106393638	UCCGCUGUAGAGGUGACCUGACUGCUGGAGACUGUCUUUGCUGGUGCAGAGAUCGGCCUUGCAGUUUGCAAUAAUGGUGAGUGUGGGCUCCUGGAACUUGCAGCGGCUCC
rno-novel-mir-1683	chr14:-:106393579:106393688	CUUUAGCCGAACCUUUCCUGACCAGCCCGGCUCUGUCUCCCAGAGUCUGUUCCGCUGUAGAGGUGACCUGACUGCUGGAGACUGUCUUUGCUGGUGCAGAGAUCGGCCUU
rno-novel-mir-1684	chr14:-:10734165:10734272	GCUGGUGCAUGUUCUCCUUGUGGCUUUGCUCAGUGAGGGCAAACAGAGCCAGCACAGCAGUGACAGGGCUGGGCUGUGAGACUGAGAGGACGCAGGAGUGUACCUGUG
rno-novel-mir-1685	chr14:-:107408956:107409065	AGUCAGGAAGUGCGUGGCUUACGGCUGGAAUUGUUCCGAGCCAGAUCGCUAUCUCCGCUGUUUGGCACACGAAUCCUGGAGUGUGAGCUAAGCACUUCCUGAGCGGCCUG
rno-novel-mir-1686	chr14:-:107557136:107557243	UCCUCAUUUGCCAGCUGGGUCUCCUGGUUUACACUUCGGGUCACACUGUUGCAGCCGAAUUUCUCCUACGGGCUGGCUGUGAGCAGGGCAGGGAGGGGCAGAUCUGUC
rno-novel-mir-1687	chr14:-:107616330:107616440	GCAGCGGCCGCCGCGGCAACAAGUGCUGGAGCUGAGGCGAGCCGGAGCCGCCCAGACCCCGCCGGGCCGCCGGUCCGCGCACUGCGCAUGGAGCGAGACGCCGCCGCCAGC
rno-novel-mir-1688	chr14:-:107749276:107749383	AGGCCGGCCUGCGCAGUUGCCCGGUUAUCCACAAUAUGUAAGGCCGGCCUGCGCAGUUGCCCGGUUAUCCACAAUAUGUAAGGCUGGCCUGCGCAGUUGCCCGGUUAU
rno-novel-mir-1689	chr14:-:107783958:107784066	CCAUCACCUCACCUUCCCUGCCUCCUCUGGUUUGGCUGAGCUUGCCUCUUGCAGGAACUGAUGGGUACUGGUUGGUUCUGAAAAGCUAGAGGUGGGGAGGGAUCCAUAG
rno-novel-mir-1690	chr14:-:10840738:10840849	UCUCCAUACUAGUCGGUCGAUCUGCGUGCUGCUUUUGAUGAGCAGUGUUCUCUGCUCUUCUAAAGAUAGCACAAGAUACUCUCGCUCUGGACCCGUAACAUUUCAUCUCCAA
rno-novel-mir-1691	chr14:-:108828524:108828636	AUCUCGACUCCAGACUAGGGCACGGCGAGGUCGGGCGAGGCCCAGCCGCUGCGGCCGCCUGCUCCAGGGCUGCCGCGGCGCGCUCGGUCCUCUGUCUGUUUGUUGGCAGGAGG
rno-novel-mir-1692	chr14:-:113770777:113770887	GCGGCGGCGCCAGAUUCUGGCGGAGCGUGGACGCGCGGGCUCUGCAGUUGCGGCGGGGGCCCGCAUCGAGCCCGCGCUCCGGACGUUUGCCAGGGUGUAGGGGGGCGGACA
rno-novel-mir-1693	chr14:-:113940249:113940356	AGGCACUGCCACGCCCCGGAAGCCACGGCACUUCCAGCAAGCUCUUUAGCCUGCCGACGUAGCAGAGAAAAUGGCAGGCUUGGAGCUGCGGGCGGCAUUAGAGCAGAG
rno-novel-mir-1694	chr14:-:113940249:113940358	GCAGGCACUGCCACGCCCCGGAAGCCACGGCACUUCCAGCAAGCUCUUUAGCCUGCCGACGUAGCAGAGAAAAUGGCAGGCUUGGAGCUGCGGGCGGCAUUAGAGCAGAG
rno-novel-mir-1695	chr14:-:114537947:114538055	GAAAAAGCACCAGAUUUUGGAACAGGCUGUUGAGGACUAUGCAGAGACAGUGCACCAGCUCUCCAAGACCAGCCGGGCACUGGUGGCUGACAGCCAUCCCGAAAGGUGG
rno-novel-mir-1696	chr14:-:114559855:114559968	CAGUUACAUUCGAGAGCAGUGGGCCAACCUGGAGCAGCUCUCAGCCAUUAGGAAGAAGCGCCUAGAGGAGGCCUCAUUGCUGCACCAGUUCCAGGCUGAUGCUGAUGACAUCGA
rno-novel-mir-1697	chr14:-:114562700:114562807	CAUCCGCCUCUGGGAGUACUUGCUGGAACUGCUCAGGGCCAGGAGGCAGCGUCUUGAGAUGAACCUGGGACUGCAAAAGAUAUUCCAGGAAAUGCUUUAUAUUAUGGA
rno-novel-mir-1698	chr14:-:12378509:12378623	UUGGGGAUUCCCCCCCCCCAAACUUACUCAUUUGACUGAGACCUCAAAACAACACAAAGUGCCAUGAUUUGUGUUUGUUUCAGAGCCUCUGUCAGAACAAGAGAGGCAGCCUGGA
rno-novel-mir-1699	chr14:-:14222360:14222469	CUGCGGGCGCUGGGCAGCUGCAGCGGGCGGCCGGGGCUGCGCGCUCGGGACGCGCGGAAUGUGAGGCGCGGCGAGCCGCUGCGCACCGACGCUCGCGCGGCGCGAAGGGC
rno-novel-mir-1700	chr14:-:17436898:17437009	GCCACGUAACGCCACGUCCCCGCGCAUGCGCACCGCGGCUGGCGGCGGUGGCUGUUUCCGGGCUCAGGGGGCCGGAGCGGCUGCUGAGUAGGAGGCUGCGGUGGCGGAGGCC
rno-novel-mir-1701	chr14:-:21040307:21040414	CAGAAGGACGCGGGCGCGCGGCCGCCGAGGGUCCCGCGCGCGGAGCCACGUACCUGGCAGUAACCCCGCGCCGGGCCCGCGGCGGCGGCCAGCGAUCGCGGAAGCAGC
rno-novel-mir-1702	chr14:-:2325089:2325199	GGAUAGCAGUGCGUUCCCAAGAGGCUGGUUACCGCUUUCCCGUGCGAAGUCUCUGGGCUGUUAGUGCAAGAUGGCUUCAGAAGGGUGGAGACGCAGAGCCUCGUUACUUCC
rno-novel-mir-1703	chr14:-:25590346:25590453	CAAAAGCGGACAAACAUUAAUUGGAGCUGAAGAGCGGGUUUUAGUCUCGGCAGCGGCUCUUGGAGCGCUGCGACCCGGUAGACACAAGCUCCACCUCACCCAUCCACC
rno-novel-mir-1704	chr14:-:2685339:2685450	UCUUAUACGUCUUGUAUUUGGUCUUUUAUUUCCUGAACAGAGACUCUACAGGAGCAGGUAAUUCACUGGUCCACAAGCGGUCUCCUUCACGUCGAAACCAAAAGACCUCAGC
rno-novel-mir-1705	chr14:-:33133912:33134022	UGUAGCUGUCCUGGUGUUCCUCUGGGGACACUGAGAAACUGCAUGUACUCCAGAACAGGUUCUCAGUGUUCUCCAGAGUGUGACAGAGCCCAGCAUGGACUUUCUUACUGG
rno-novel-mir-1706	chr14:-:33133922:33134034	CCUUAAGUGAUUUGUAGCUGUCCUGGUGUUCCUCUGGGGACACUGAGAAACUGCAUGUACUCCAGAACAGGUUCUCAGUGUUCUCCAGAGUGUGACAGAGCCCAGCAUGGACU
rno-novel-mir-1707	chr14:-:33628950:33629057	UACUCGGGCCUUUACUAGAGCUCUCUCUAUUCUCUCUUUUGGCUUGGAAGAACUUUUAUGAAGGACCUCUAGGUAAGAGGGAUUUUCUCUUUGGGCUUUCAGGCAACU
rno-novel-mir-1708	chr14:-:33699217:33699326	GUGGAGCCCAGGUGACAUGCUGCCAGCCCCUUAGUCGUGACUAAAAUAUCCCAGGACUGUGGGGUCUGGUAUAAAUGUGGUGUCCAUGGAGUCCCUGUGUGCUACAGGAC
rno-novel-mir-1709	chr14:-:34370014:34370125	AUCUCUCCCCAUGUGCCUACCACUGGAUGGCUGUGGUGAGGAAGGAGCACAGUUGCAGUUACCCUGCAUGCCCCUGACAUCCUUCCUCUCCACAGAGGUCUGGUUUUGUCUC
rno-novel-mir-1710	chr14:-:34370015:34370125	AUCUCUCCCCAUGUGCCUACCACUGGAUGGCUGUGGUGAGGAAGGAGCACAGUUGCAGUUACCCUGCAUGCCCCUGACAUCCUUCCUCUCCACAGAGGUCUGGUUUUGUCU
rno-novel-mir-1711	chr14:-:34417026:34417133	GUGGUCCAGGCAGGACACUGGAGGAGGAGACCUUGGGUUCUCUGUUUCAGAUUGGCAAUUACUGCCAAGAAGACUGUUUUCCAAGGAGUUUGGUUCCGAAAAAGAUAA
rno-novel-mir-1712	chr14:-:34417076:34417183	UCAUCUGCUACUCGGGUUCAUUGACUUUACCCAUUCUCCUCUCAAUCCUUGUGGUCCAGGCAGGACACUGGAGGAGGAGACCUUGGGUUCUCUGUUUCAGAUUGGCAA
rno-novel-mir-1713	chr14:-:35149572:35149680	AGGAGGGGCUGUCGCGCGCCGCUAGUGGCUCUGGGGGCUCGGCUUUGCCGCGCUCCGUGCACUUGGGCGAGAGCUGUAGCAGAGAGAGGAGCUCAGAGUCUAGCGCAGC
rno-novel-mir-1714	chr14:-:36665006:36665117	CGGGGGACGGCGGCCGUGCCCAGCCCGGGGCUGCGCGAGAGACAAAGCCCUCUCUGCUGUCCGACCCGGGCGCCCUGAUCGCCUCCCUUUUCCCUCCGCAGGUCGACCCACC
rno-novel-mir-1715	chr14:-:37163659:37163766	ACCAAAGAGUUGUUGAGGAGCUAGAGAUCCUGGAGGACUAGCAGUGAUGCCAUGAGGUGAACUGGGUACUCUCUGGGCCCUUCCUCCAAACUCUAUUACUUCUCCUCU
rno-novel-mir-1716	chr14:-:37283087:37283196	GGAAAGGCAGGCUCAUGGAAUUCUGGGACUUGUAGUCUCAGCUGCCCGGGCCGCGGUUGGAUUGGGUGCACGUGGGUAACUGUGGAAACGAGUCCCAGAAUGCAGCGCGU
rno-novel-mir-1717	chr14:-:37513379:37513490	AAGGAACCUGAAGUUAUAGUUGACUGCACCCAUGUAUAUACCUAUAGAUAUACACAUGUAUAGGUAUAUACAUGGGGGCAGUCGACCAUAUAUGUAUCUAUCCAUAUAUGUG
rno-novel-mir-1718	chr14:-:37513386:37513496	GAAGAUAAGGAACCUGAAGUUAUAGUUGACUGCACCCAUGUAUAUACCUAUAGAUAUACACAUGUAUAGGUAUAUACAUGGGGGCAGUCGACCAUAUAUGUAUCUAUCCAU
rno-novel-mir-1719	chr14:-:42519625:42519735	GGUCGCCGAGGCCUCCGGCCGCGGCGUACACAUCCGUGUUCGCUGGGGUCCAGUCUAUGGAGUCAGUUGGCACGGCAGGUAGCUCGGAGGCAGGAGGCGGUGACCGAGUUG
rno-novel-mir-1720	chr14:-:42858726:42858833	CCUUAAAGAAUCUCAACUCUUUGACCCAAGUGACCUCCAGGAUACUUCCAACAGGGUCACUGUCAAGUGAGUAAUGCCUGAUUUGUAUUUAAAGGAAACCCUUGGUGU
rno-novel-mir-1721	chr14:-:42985775:42985882	UGGCUAGCUCACAGAUGCAGUGGCUGAGGCUGGAGGUGAGUUGCCUCCCGAGAGGGGCUGUUUUGUCUCCUACAGGUCUCUGUAUAGGCUGGGCUUCCUCACAAAAUG
rno-novel-mir-1722	chr14:-:43133288:43133401	CCACCCAGGCCACCAGGGAGCUCUGUGACAGCCACACCAGUGUGAACUUCAGAGGCUAAGCUCUUACCCUCCUGUGUCUUGUACCUUGCUCUCUAUGGUCUCUUUGGUUUCUGU
rno-novel-mir-1723	chr14:-:43143282:43143389	GACUCGGGUGGGGGAACCCGUGUGUGUGUGUUUGGUGGGGGGUGGGGAGUGGGAGGGCGGCACGCUGAAUGCUCGUGCUGACCCCGCCCCCUAGCAGGUGCCCAUCAU
rno-novel-mir-1724	chr14:-:43879479:43879586	UUGGAAUAGACAUCCCCUCAGCAUCCCUGCUGCAAGCUUCUUUCAAGACUUGCCAGGGUUGAAUGUUACAAUCCAAGAAGUCUGUGGAUGUUGUUGAUGCUGUUGGGA
rno-novel-mir-1725	chr14:-:44293358:44293465	GUGGCCUUGUCUUCAAAAUCAUGGGAUGUAGAGACUGCAACAGAACUGCUUCUGAGUAACUGAGGCACAGGAGCUGCCAGCCACGCUCGCCCCUUCCUGAGGAGCGUC
rno-novel-mir-1726	chr14:-:44348619:44348729	ACUGGAGCGGCUGCGCCGCCCGCCCGGGUCAGCGUGGUGCGCAUGCGCGGACCCGGCGCCAUUUUGGUGGCCGGGCGCGGAGGUGAUUCUACACUGAGGGGGAACGCGACG
rno-novel-mir-1727	chr14:-:44479258:44479365	GGCUCCGCCCCCGCCCGCAGCGAGCGGCCCUGGGCGUGGCUGCGUGCGCCGCGGGUCCCGCUAAACCGACCGGCUGCAGGAGUGGGUGUUGUGGUCCGGAUUAGUCGU
rno-novel-mir-1728	chr14:-:44830714:44830821	GUUAUUGUUUAAAAACAGGAUUUAUGACACUCCCUCAUUAAUGAAUCUCCUUCUAUUCAGGCCGACUUGAGCUGAAGGAAGAGAACAUCGAGUGUCUGCUGUCCACGG
rno-novel-mir-1729	chr14:-:44866960:44867072	CCUGGCGUCGCCUGACGGAGAGGAGUGGCUCGGCCCGGGAGGGCCGCUGCGCGGGGCGACACUGUGGGGAAGGGGCUGGGGGCGCGCGCGGGGCCGAGCAUCCCUCCGCUGUG
rno-novel-mir-1730	chr14:-:45174089:45174196	GAAAUAAUGAGUGGUCUGUCAGGCUGGCCCCGGGUGACUGGGCCCCCGCGCCCGGCCCCCGGCCCGCGCCCUCCCGCUCCCCGCCACUUCACCGUCCCGCCCACGCCA
rno-novel-mir-1731	chr14:-:46126938:46127045	GCAGCCUUCCUGAAGAGGGGGCUGUUGAGUAGGAAGGGGAAAAAUGACCCACCAGUCAAGGAGCUCCAGAGGUAGGAGAACAAAUCAUGUGUUCAGAAGGCCCAAGGC
rno-novel-mir-1732	chr14:-:46652597:46652705	CGCGGUAAUGGCCCGGCAGCGAGCCGUCCAGCUUUGCCCUUGCCCUCGCCGCGCCGCGCGCACCCCGGGGCCGGGCGGCGUCGGCUUCGGCCGGCCGCGCAUAANAGAC
rno-novel-mir-1733	chr14:-:5289408:5289518	GAGAAGUUCGUGGUUGACAAAUCCACUGCGGGGGCUCUGGACAAGAAGGAAGGUGAACAGGCCAAGGCCUUGUUCGAGAAGGUUAAGAAGUUCAGACUGCACGUGGAGGAA
rno-novel-mir-1734	chr14:-:5423811:5423920	AGCAGCUGAGCUCCAUGCAGCCGGAGGGCUUCCAGGAUCUGAAGAACCUGAGGACCCUCUACUUGAAGAGCAGCCUGUCCCGGAUCCCUCAGGUGGUGACAGACCUGCUG
rno-novel-mir-1735	chr14:-:58652177:58652284	AGAGUAAAUUAAAACAGGUCAGGGCAGUGGCAGGGCAGAUGGAGUCUAAGUAUCAAGGCUUAUCCGAUCCAUCGAUGUUUUCAUGCCCACAGUAGCUACUGCAAGGAG
rno-novel-mir-1736	chr14:-:59326895:59327002	GCUGCGGGGAGGCUCCUGAGCUCGCCAGCGGAGAUCUGGUUCUCCUAGUUGGAGCCGAGGCAGGCUGUGUAGGCUGUGGGGCUGUAAGGGAAGAGGAUGAGGAGGGUU
rno-novel-mir-1737	chr14:-:59735166:59735273	UAGUCCGCGGGCGGCGCGAGGUGGCUGGCUCCUGGCGGCGGCGGAGCAGGGAAAGACCCGCGCCCCCGGCCCACCGUCGCUAGUCGCUCCGGCUCCCUUCCCCGCCCC
rno-novel-mir-1738	chr14:-:60933656:60933768	UACAGGUAGAGCACAGAAGCUUUGCUCAUGCUGUUUCUGGAGAACCCAGCCAUUUCUCCCAGAAAUGGAAUGAGUGGAGUUGCUGGGACUCUCCCAACCCACAUCCUACUUCC
rno-novel-mir-1739	chr14:-:62646014:62646121	CAGGCUUCCUCAAUCCUCACCGGCUGGAGUCGCUGGCGGGUUGCUGGGUGUGUUAGGUCCUGCUGUUCCGUCGUUGGAUGAGGCUGGAGGUCCGCCGGUGAGUUUAGG
rno-novel-mir-1740	chr14:-:67717183:67717296	UUCACUGGAAGUGUGCCCACUGGCAUGAAGAUCAUGGAGAUGGCCGCUAAAGGAAUCAAACCCAUUACUUUGGAACUUGGGGGCAAAUCUCCUCUGAUCAUCUUCUCUGACUGU
rno-novel-mir-1741	chr14:-:7054480:7054591	CUGGCUGUCGGCGUCCGGCGCUGGGGGGAAGCGCGGCGGGGUCCUAGUGCCCGCUGGUUGCUGGUGUGAGGCUCGCGGCGGGGCUCCCGGCGAGGUCGGACACCUCAGACCC
rno-novel-mir-1742	chr14:-:7325925:7326033	UGAGGACGCGGCGGCAGAGAGCGCUGCGUCUGCCCGGCAGUAUCGCCGACGGCUGGGGCCGAUGCUGAACCCAGAGCUGGUGGUGGGAGCCCGCGGGGCGAGCGCGCUG
rno-novel-mir-1743	chr14:-:76856970:76857077	ACGACACUUCCUGCUCGGGGCCGAGGCAUCAUUUAAAAAGCCGGCUCAACCGCCCGGCACGAUGAGUCGCGGGGCUGAGCCGGCACUGCACAAAGGCCGCAGGGUGGG
rno-novel-mir-1744	chr14:-:76989659:76989766	CGCGGACACCGCCCCGCCCCUCUUACGGCCCCACCCCGGAAGUGACGCGACACGACCGGUGAAAAGGCGGUGCUGAGGGUUGUAGGUGCGGGAUGUGUGGUUUUCUCU
rno-novel-mir-1745	chr14:-:77279763:77279872	CCGAGCGUCCGGAGACUCCGCCCCUGGGCCUGGCGUCGGAAGUGCUGCAUGCAGUCACUUCCGUCGCACUGGCGGGCGUCAAGAUGGACGCUCCGUGGGCUCGGGAGCAG
rno-novel-mir-1746	chr14:-:77321893:77322004	CCGGCGCCGUCACUUCCGUUUGAGGCUUGGCCUCUAUGCGCAUGCGCAUUGACUCGUGCUAGCCGGGAUUGAGUUCUGCGCGGGGAAGCUGGGCGAGCCGGUGGCGGUGCUU
rno-novel-mir-1747	chr14:-:77404396:77404508	UGCAGAAGAAUGUUUUCUUGUUGGAGGAAAGAAUGACUGAGGGUCAUUCCUUCCCUGAUAUUCUUUCCUUCCACAGGAAACCGAGAUCGACAGCAUUCACCAGUUAGUUGUGG
rno-novel-mir-1748	chr14:-:77404397:77404508	UGCAGAAGAAUGUUUUCUUGUUGGAGGAAAGAAUGACUGAGGGUCAUUCCUUCCCUGAUAUUCUUUCCUUCCACAGGAAACCGAGAUCGACAGCAUUCACCAGUUAGUUGUG
rno-novel-mir-1749	chr14:-:77404401:77404510	AUUGCAGAAGAAUGUUUUCUUGUUGGAGGAAAGAAUGACUGAGGGUCAUUCCUUCCCUGAUAUUCUUUCCUUCCACAGGAAACCGAGAUCGACAGCAUUCACCAGUUAGU
rno-novel-mir-1750	chr14:-:78272531:78272640	GGGUGUGGUACAGAAGUAACUCUGGGGUUUUGCAUUCACAGACUGUGGAGUACAACAUCUUCGAGGGCAUGGAGUGCCAUGGCUCCCCCCUGGUGGUCAUCAGCCAGGGC
rno-novel-mir-1751	chr14:-:78272581:78272690	ACUUACAGCAUAGCAUCAUAUGUGUGCCCUGUGGAUGCAGAGGAAACCUCGGGUGUGGUACAGAAGUAACUCUGGGGUUUUGCAUUCACAGACUGUGGAGUACAACAUCU
rno-novel-mir-1752	chr14:-:78308878:78308986	GUCUGUCUUCAGCGCCCUCCUCUCGCCCAGCCUCUCCCUCCUCCUCCCGCCCUCCUCGCCAAGCCGGGCGGUGCAGGCAGCCGGAGCAGCGGCGGCGGGCCGAGCAGCG
rno-novel-mir-1753	chr14:-:78515630:78515737	CUAGAGCCUUUGGUACUUUCCUCGGGGAUGGAAGGAGCGGGAUGUGCUAUAGGAGCGGUGUCCUGCUUCCCAGGAGAGCCGAGGCAUAAAAGUCAGGCGAGUAGUGAC
rno-novel-mir-1754	chr14:-:79922625:79922738	UGCAGGUCAUGGGGGCUAGCCUCUACCCUAGGAGUUUGAGAUUCAAACUGGCUUUGGGAGCUUCCAGAGUACAGUGCGAACCUCUCCACCAUGGGGAGAUGCAGGCAGUGACCU
rno-novel-mir-1755	chr14:-:80034921:80035031	GCCCCGCCCCGGGCUCCAUUGUUGAGGCAGCGGACGCUCCGCGGUCUGCGCUCCUUUCGGCCGUCCUGCGCUCACGAGCCACUGAAUCCUGAGGUGAGGCGGCGGCGACUU
rno-novel-mir-1756	chr14:-:80091314:80091424	AUUCGCCCUACAUUAGCCACUCGGCUGUGGGGGACAGGCAGAGCUAUGGUGAGGUACGGCUCUUCAUCAUGUGUUGCAUGCUUCCCCCUGAGCUGGCUCUUGUGGACAGAG
rno-novel-mir-1757	chr14:-:80381439:80381550	CACUCGCUCAAAAACUGGCUUGAGGUCUGCAGACGUGGGUCCGUUGGAGCCUCUCUGUUGGAGGCCAGGAGCCAGGCCUGCAGCCCUCCCCCGCCCUGGUUUCUCUGCUCAC
rno-novel-mir-1758	chr14:-:80732094:80732203	ACCCCCCUUCCCCCCCACCGCCGCGUCGCCGCGCUCUCUGGGCACCUCCAGCUCUGCACUUACGCGCGCGGCAGCUGCGGGGAGCCCGGCAGCCACGCUCUCCGGCGUGC
rno-novel-mir-1759	chr14:-:8079936:8080043	AGCGCUGGCGGGGGAUGGGGUGGAAGGGAUUCUGCACAAAGCCAAGAAGCAUCUUCUCUGCCUCUCGCUCCAGCUCUGCACAGCACCAAGGGCAGAUCAAAAAGCCAU
rno-novel-mir-1760	chr14:-:80933862:80933972	CUGGAGGGCUCUGAGAAGUGGGCUGCCUGACAGGGGUGUGCCUGGCCCCCAGAAGCUGAGUUUGCCCAGGGUCCUGAGAUCAGUUUGCUGGAGGGCCUCUUGCAGAGCCUU
rno-novel-mir-1761	chr14:-:81368659:81368772	ACCUGUGAGUUGUGCCCCCCUGCAGGAGGGGGACACUGAAUCCUGGUCCUGGCUGGAAGGCAUAGGAGGCUUCUGCCAGCUCUGGUUACAGCGUCACCCUCCUGAGCCUUGCCU
rno-novel-mir-1762	chr14:-:82140019:82140131	CAACUAGGAUCAGGUGGAGUCCUAGUUUUGGUACAGGGGCAUUGCCAGUCACAUGAGCUAAGGAAGCAAGUGGGCUGGCUGUUCCUCUGUCCUCAAGCCUUUCACAUGAGGAC
rno-novel-mir-1763	chr14:-:82287684:82287792	UCGGGGCGUGGCGGGAGCAGCCCCCCCCCCCCCGCUGCUGCGCGCCGGGCAGCCCCAGUUCAGUGAGCUGUGGCAGCGGGGGUGGCGGGAGCAGCUGGCGCCGUGCGGU
rno-novel-mir-1764	chr14:-:82374971:82375078	UGCGCCGCUGCUGGCCCCGCCCCCUUGUGUGAGCUGGCGCGCGCCGGGUGUGACGUUAACCUACGGGUGUCGGCGGGGAGGCGAAGGCUGGCUGUAGUGCCUACCGGC
rno-novel-mir-1765	chr14:-:82658645:82658752	AGAGCGCUGCCUACACCGGAAGGGGUGGGUGAGACAAGAGGCUGCAUCCGGUGGUCCGUGUCACCGGAACAGCGGAACGCUGGUACUGUCUCCUGAAGCGGAGGGUCA
rno-novel-mir-1766	chr14:-:83086997:83087104	GACCCAAGCCAGGGGUCGAGGCUUUUUUUUUCUUGGUUUUUUUUUAAAAAAAGAGUUCUCAAGGAAGAAGCUCUCCUGGUAGGAAAGGGGGAAGCUAGAUUGCUAGAA
rno-novel-mir-1767	chr14:-:8320333:8320440	CUAGGAAAAGCUCCCUUACUGAAACAUCCUUAAAUACCGCAUGGUAUCAAUGUCGAUGUGCCAUGAAGGAAAUAAAAGUGAGGGAGCAUCCCCACCAAUGAGCUUCUU
rno-novel-mir-1768	chr14:-:83412294:83412401	GCGAGUGGGGUGGUCUGGGUGGGUCUGUGCUGUACAGUUGCUGGCGGACACCGGGCUGGGCCACUCCUGGGGCGUUAGCAGCAGGGGUCAGUUAGGAGAUCACAGCCU
rno-novel-mir-1769	chr14:-:83509399:83509510	AAUACGAUCCAAGCGCCGAGCCAGCGAACCAGCUACAGCCGCCCCUCCGAUGCCCGCCCAGAGUGUAGGCGAGCGUGCGGGAGGGGCGGCCAGAGCCAGUGGAUCUGAGCCC
rno-novel-mir-1770	chr14:-:83509399:83509511	CAAUACGAUCCAAGCGCCGAGCCAGCGAACCAGCUACAGCCGCCCCUCCGAUGCCCGCCCAGAGUGUAGGCGAGCGUGCGGGAGGGGCGGCCAGAGCCAGUGGAUCUGAGCCC
rno-novel-mir-1771	chr14:-:83561908:83562015	GCGGGGGUGGAACGGGGCGGGGCCGGGGUCGAGCAGCCGCACGUGCGCCGCGGGUGUAACCGCUGCUGCGCUGCUCGGCGCACGGGACUAACGUCCCCUACCCAGGGG
rno-novel-mir-1772	chr14:-:83603023:83603131	GCUGCUCCAACCACACACCUCGGUUCUGCCCGAGCUCCUCCUCUUCCUCCCUCCCUCAUUCAGGGUGGGUGGGACUGAAGGACGGACUAACUUGACAGCAGCAUCUCAU
rno-novel-mir-1773	chr14:-:83606690:83606797	AGAGUGGGAAGAGAAAGCCUGCAGCCUCCUGCCUGCAUUCCUAGACACCGACUCACUGCUGCCCGAAGCCACUGGAGCGGCAGAGCUGUGUGAAAUGUCAAAAGGAGU
rno-novel-mir-1774	chr14:-:83953429:83953538	ACCCGAUGCUGGGGGAGACCUUCGAGUUGGAUCGCCUGGAGGACAUGGGCCUGCGUUCUCUCUGCGAGCAGGUAAGGUCAGCUAUUCAUCUGGCCGGGUGACAAAUGGAC
rno-novel-mir-1775	chr14:-:84002423:84002532	CAGACAUGACGUGGCCGAGGGAAGCCCGCCCCACACCCGGGGCCCGGAGCUCGCGGGGUCGCACACAGGCUUGGGGGAGGAGGCGGGGAGGCAGCUUGGCUCUCACGGCG
rno-novel-mir-1776	chr14:-:84150946:84151053	CCGGAAAUCUUUCAGGAAGCAACUGCAGGGCGGAGCCGCGGGCGACCGUCUCUAAAACAGAGAGGGCCCUUCAUGAUUCCGGAUCUCAGUAGCAACGAUUUCUCCUCG
rno-novel-mir-1777	chr14:-:84170755:84170864	AGCUGCCAGAUCCACCGGGGGAGCGGAGCCGCAGUCAGAGCAGCCUGCGCAGCUGCAGCCAGUCCGAGCUCGCGGUUCUGCGUCUGCCGGCCCAUCAGCGUCUAUUCCCC
rno-novel-mir-1778	chr14:-:85203011:85203118	UUUCUCUAGGGGAGGAAGGACUGUCUAUAUAACAGGGAGGUAAUGAACGUUUGGGUACAUUCGUGAUCUCCCAGAUGUUAGCUUCUCCUCCAAUUCUCCUGGCAAUAU
rno-novel-mir-1779	chr14:-:85314383:85314496	GGUCUAACGGCCUCCCCGAGACGGCCGCCCACCCCUCGCAGCCAGUCUCGAGACCGGCUGGACCGGGGACGGCCUCGCAUGGCCCCAGGAGGCCGAGGCGCUCAGCUGUCGGCC
rno-novel-mir-1780	chr14:-:85331922:85332032	CAUAGAAGAGACCAUGGCCUACCCCAUAGGAUUUUAACAGAACUGUGAAGCAGUCUGUUGGAUCCUGUGAGGACAGGACACGGGGCAGUUCUCUUUCCCUUUUUUUUAUUG
rno-novel-mir-1781	chr14:-:85331938:85332049	GAAGUCUCUCCUGGAGCCAUAGAAGAGACCAUGGCCUACCCCAUAGGAUUUUAACAGAACUGUGAAGCAGUCUGUUGGAUCCUGUGAGGACAGGACACGGGGCAGUUCUCUU
rno-novel-mir-1782	chr14:-:85331939:85332049	GAAGUCUCUCCUGGAGCCAUAGAAGAGACCAUGGCCUACCCCAUAGGAUUUUAACAGAACUGUGAAGCAGUCUGUUGGAUCCUGUGAGGACAGGACACGGGGCAGUUCUCU
rno-novel-mir-1783	chr14:-:85503462:85503572	ACCACGGAGAACCCGAUGCUCGGGCUUCUGUCCCGGCACGCGGCGUGGACCUGCCUGUCCCGCUUUACCAGGAAUCUGCCCCGCGUGCCGGCUUCGAACUUUCCCGGACUC
rno-novel-mir-1784	chr14:-:85508597:85508707	CCGUGUCAACUAGGCGAAUUCGGGCUUCUGUCCCGGCACGCGGCGUGGACCUGCCUGUCCCGCUUUACCAGGAAUCUGCCCCGCGUGCCGGCUUCGAACUUUCCCGGACUC
rno-novel-mir-1785	chr14:-:85753499:85753606	CAACGCGGGCGGGGUGAGUGUCCAGCGUGGCUGCCCAGCUGUUCGCCGUGCGAGCUGGGCCUUAGGGUGGGUGGACGGUAGAGACAGCCGGUUGCUGAAGUCCAGGGU
rno-novel-mir-1786	chr14:-:85766201:85766308	CUGCUCUCAGUAGUUUUCCAGAACUGAGCCUUUGAGAGUAUUCUUUAUUGUCUUCUUAUUUACUUCUGGGUCCCAGAAGAUUUUUCCUAUACCAAGGGUAAGGAAAAA
rno-novel-mir-1787	chr14:-:85982657:85982764	CCCAGGCCGCUGCGCUCAUGGCGUCGCCGGGGUGAGUGAGGCGCUCCGGGUGCGCGGGGGGCGCCUGUUGGGUGAGGGGCGGGCCGAGAUGUGCGUGUUCAUGACCCG
rno-novel-mir-1788	chr14:-:85995227:85995336	UCACAGUCCUGAAGACGCGUAAGGUUGGACAGCUGUAACUGCUCAGUUUCCGACUCACAGUGUUCUGUGGUGCAAAGCUGGGGAGGCAUACAGUAGUGCAACAAGAUAAC
rno-novel-mir-1789	chr14:-:86116018:86116125	UAUCCAGAUGAGACCCUUCCUGGUGAGCCGGGCGCAGCAGCACUGGGGUAAGCUUGGGUACGCUGCUCCCAACAGCCCAGCAUCUAGAACUGGGACUUUAUCUAACCU
rno-novel-mir-1790	chr14:-:86211878:86211989	UACUUGGGCUCUGCUGGAAGUGGGGGCGUCCAAGGGUGUGACAGGCUAGUGCCUAGUGGUCAUCCCUGUUUUCUCCCCGCAGCCCGGAAGCAGGAAAUCAUCAAGACCACAG
rno-novel-mir-1791	chr14:-:86211878:86211991	CUUACUUGGGCUCUGCUGGAAGUGGGGGCGUCCAAGGGUGUGACAGGCUAGUGCCUAGUGGUCAUCCCUGUUUUCUCCCCGCAGCCCGGAAGCAGGAAAUCAUCAAGACCACAG
rno-novel-mir-1792	chr14:-:86211928:86212039	GAGCAGCUGUGUGGAUGCCCGUCUGCAGCUCCCGAUCUUCCAAGGCCCCUUACUUGGGCUCUGCUGGAAGUGGGGGCGUCCAAGGGUGUGACAGGCUAGUGCCUAGUGGUCA
rno-novel-mir-1793	chr14:-:86211928:86212041	GGGAGCAGCUGUGUGGAUGCCCGUCUGCAGCUCCCGAUCUUCCAAGGCCCCUUACUUGGGCUCUGCUGGAAGUGGGGGCGUCCAAGGGUGUGACAGGCUAGUGCCUAGUGGUCA
rno-novel-mir-1794	chr14:-:86228424:86228532	UAGUAAAGCGGAGACAGAGCAGGGAGCAGAUACUGUUUGUGUCAUCCUCCCCAUGGCGGAGGGGCGCAAAGGCACACUGAGGACUGACCCUGGUGCCUCCCAGGGCUAU
rno-novel-mir-1795	chr14:-:86673439:86673548	GCUGUCCGUGUGGGAAGAGUCCGAGGACAGUUAUGGAGGGUGGCCACGCCAUCUGGCUGUCCUUAGGUACGCAUCCGGGCCUCCGGCCUUACCCAGUGAUACUGUGUAUC
rno-novel-mir-1796	chr14:-:86734655:86734768	UGUCACUUUUCAUAAUUAUUUACUGCAAAAUGAUUGAGAGGCUUUUGGUGCAGGCAGCCAUUAGCCUGCUUCCUUUGUUACCUCUGGAUCACUUUGCAGUAAAUUGCAGGUCUU
rno-novel-mir-1797	chr14:-:86735644:86735757	UAUAAUUAGCUGAAUAGAAAGAAUGUGGAAGUGGUCUGAGGCAUAUAGAGCAUAUGCCAAGAACACUACCAUAUAUGGCAUCAGCUUUGGUUACCAGAGAAAUUUUCUUAGUCA
rno-novel-mir-1798	chr14:-:86735646:86735758	CUAUAAUUAGCUGAAUAGAAAGAAUGUGGAAGUGGUCUGAGGCAUAUAGAGCAUAUGCCAAGAACACUACCAUAUAUGGCAUCAGCUUUGGUUACCAGAGAAAUUUUCUUAGU
rno-novel-mir-1799	chr14:-:86801475:86801585	AGCUGUGGGGUGUAAGGUCUGUGGACGGUUGGCAGCUUAGUGUUAUGUGUUUGGCUCACCGACGCUUCCUUCCGUCUAGGAAACCUAAGUUGCUGGAGCUCGAAGUGACUU
rno-novel-mir-1800	chr14:-:86865366:86865479	CUUCCUGAUCAUGGGCCCCACAGGGGUGCCUGGGGUCUGGAGGCCGAGCUGCUGGAUGAGUUACUGGACUCAACACCAGCCUCACCCUCCGGCUCCUACAUUACGGCAGACGGG
rno-novel-mir-1801	chr14:-:86868973:86869080	UUGGGGCUUAGGGGCUUAGGCUCCUUUCCUGGGCUCCCUGUGUCCUCUGUCCAGACAUUGAGCGAUAGGUUGAGCCAUCACUUAUUAAAGUGGCCCUGCCCCCUCUGC
rno-novel-mir-1802	chr14:-:86869396:86869503	CUUGCCUCAAUAGCUACUAAUUUCCCGGACUCCAGCUCACAGAUGACAAUGUGUCAUUCAUUCAUCUGGUGCCUGGCACUGGGAGGGGAGGGGGCACGCGCUGAGCAU
rno-novel-mir-1803	chr14:-:88739379:88739490	CAGUACAGCUUUGCCUCGGAUGGGGAGGCCAGGCACGGCAGCCGCAGUGCAGUGGACAGUGCUGGCCUUGCCCAGCCCUCACCCCACAUCCCAGUUACUCCCACCCAUGGAA
rno-novel-mir-1804	chr14:-:89314025:89314139	GCCCCCAGCUGCCAGCCAGGCCUGCCAGUGGCCUCCCCUUCUCACACAGUUCCUAGCUUGGCUUCCCCAGCGAGCUGGCACUUUGGCGAAAGGACAAAAAGGCUUGGGAAUGAGG
rno-novel-mir-1805	chr14:-:91215776:91215883	AAGCUGUCAGUUUCUGAGAGUCUGGAAGAAACAAAACCCCAUGGACCAUACUGCAAAUUCACAGAGCACCCUGGGAGAGGAGGUGGGGUGGUCCAGCUUUCUUCUUCA
rno-novel-mir-1806	chr14:-:92023545:92023655	UCGCUUGAUGACCUCUGCACCCUACUGAAAACCCCCUAAGCCAGCCGGAGCAGGGUAUGAAGAGGUCCUGCCUCUGCUGGCUUAGGGUGAGAAGUACCUCACAGUGGUUGU
rno-novel-mir-1807	chr14:-:9394770:9394878	CGUGGGAUGAUGAUGUCCGAGAAUGGGGCGUUCUCCCCAGCCUUCCUUGUGGGUUUGCACAGACAGUUGCUGUCAUGGCGACACCUGGUUUGAUGAAAGGUCGAGGCGC
rno-novel-mir-1808	chr14:-:9428941:9429052	UAAGUGCUGACUUUAUACCUUCUCUGUAGAUGGAAGAACUGGUGGAUUCGUGGGAUCCUCACCCUGACCAUGAUCUCCCUCUUCUUCCUGAUCAUCUAUAUGGGGUCCUUCA
rno-novel-mir-1809	chr15:+:103357913:103358023	CUUUUUCCUCCUAGUCCUAGUGUACUUUGUGACUGCGUGCAUCUAUGCGCAGUCCCUGUGGCAGGCUAUGAGGAAAGGAGGACCCAUGCACACCAUCUUAAAGGUCCUCAC
rno-novel-mir-1810	chr15:+:105756959:105757068	ACACUUGCAGGCCAAAAUCAAAGCUGCGCAGCACCAAGCCAACCAGGCCGCGGUGGCCGCCCAGGCAGCCGCGGCCGCGGCCACAGUCAUGGUAAGUGCGCCGGCCCUGC
rno-novel-mir-1811	chr15:+:106281810:106281921	AGUGUUUUACUACUGCAGGGGAGGCAGAGUGGGGAGCAAGCAUAGGACAUCUCUGAUGGGUGUAAGGUGAUGGCUUCUGUGCACUCUCUAGUUCAUGCAGGACGCUUCGGAU
rno-novel-mir-1812	chr15:+:106455910:106456024	AAAGAGAACCCACUCCCACAGGUUGUCUUUCUUAAUUAGUGUGUGUGUGAGCAGUAUCUAUACCUUACCACAUAUGUGGAGGUCAGAGGUCAGCUUGUGGGAAGUCCAUUUCCCU
rno-novel-mir-1813	chr15:+:106562199:106562308	UGUACACUGGUGCAUAGUAUCUACAGGCUGUACAGUAGUGCAUAGUAUCUCCAGGCUGUACACUAGUGCAUAUCUGCAGGCUGUACAUAGUGCAUAGUAUCUGCAGGCUG
rno-novel-mir-1814	chr15:+:106562249:106562358	CCAGGCUGUACACUAGUGCAUAUCUGCAGGCUGUACAUAGUGCAUAGUAUCUGCAGGCUGUACACUAGUGCAUAUCUGCAGGCUGUACACUGGUGCAUAGUAUCUACAGG
rno-novel-mir-1815	chr15:+:107407457:107407564	CACGAGCGCUUCCUCGCCGAGAGGCUGGAGCUGCGGCAAUGCAGGCCUGGGCCACCGUGUCUCUGCCGCCCGCUUCAGUUUUCCUCAGGGCUCUGGGGGUCGCUCAUC
rno-novel-mir-1816	chr15:+:107411389:107411496	CACGAGCGCUUCCUCGCCGAGAGGCUGGAGCUGCGGCAAUGCAGGCCUGGGCCACCGUGUCUCCGCCACCCGCUUCAGUUUUCCUCAGGGCUCUGGGGGUCGCUCAUC
rno-novel-mir-1817	chr15:+:108154409:108154516	GUGCUUCCUUGCAGCCUGGUAUGGAGAGGAGGUCACCGAGAGGCACACCCAUCUGUGACUUGACGCCUCUUCAAGCACAGGCAGAACACGGAAGCACCGGGUCGAAUU
rno-novel-mir-1818	chr15:+:108232145:108232253	CAGAAAGGACGUGCUGAAGACUCUAGGGCUGCUGCUGUCAGGAGAGAGCUAGAAGACAAUGUUCUCCACGAGGGCUGAGCCUGACAGGAUUUAUAACACAGCUUCAAGU
rno-novel-mir-1819	chr15:+:108908363:108908474	UCCCGCGCCUCCUCCGCCGCCGCCUCCUCUUCCUCUCCGCGCCUUCGCUCGGCGCCCGGCCGCCUGAGGCAGAUACAGGCGGCGGCGGCCGGCGCAGUAGCCCGGCUCCCGA
rno-novel-mir-1820	chr15:+:12839957:12840070	CCGUCGAGAAGAUUCAGAAUAUGAAAGAGGUGUUGCAGGUGUGGCUGAUGUGUCACAUGUACAUCAGUAAGUGGCGGAGAGGAGAGAGGCUAUGUCAACACUCAGUGUUCUGAC
rno-novel-mir-1821	chr15:+:14119572:14119683	GCCUUGUUGGAGGAAGUGUAUCACUGUGGACACAGACUUUGAAGUCUCAUAUACUCAAGCUAUGGCCACUGUGGUGCACAGUCUCCUCCUGCUGCCUACAACUCACAGUGUA
rno-novel-mir-1822	chr15:+:14371814:14371921	UUUAAGAUAAACUCUCUUCCCUGAGGAGUGCUGACCAUUUCUGUCCAGAGAUGCCUUUCUAUCUUAGUAUGUUUAUACACUUCUCCAUUGAGAGUUCUUGGAGUAAUG
rno-novel-mir-1823	chr15:+:15275432:15275539	UAGGAAGAAGCGCCUACCGGGACAGCCGACCCUCGGCUGCCUCCAGCGCCCCCCAUCUUUUGCACCCCAAGCCGAGGACUCCGGGGACCCUCCUCUCCCAGGCGCCAC
rno-novel-mir-1824	chr15:+:17680617:17680728	GAUUACUGCAGUCACUCUCUACUGGGGUUCUCUACUGUCUGGCAUCACAUUAGCCAGAGUAGAGCUCUUCAGUUAGGAGUGACAUGCAAACCAUGUAAUUCUUCUCCUGAAA
rno-novel-mir-1825	chr15:+:18415385:18415494	AUAGAGGGUUGGGGGUUCUCCCCUUACAGGUCCAUUGCUGUUCUGACAUGUAAAGAGGAACAGGCGGGGCCUCUGGGAUAGAGUAGGACCGCCCAAAGGACUUGGCAGUC
rno-novel-mir-1826	chr15:+:19014109:19014219	UCACUACGCUGGCCUGAGACUGCCAACUGCCUGGAAUGUCUGCGUCAGCCUCCUGAGGUUCUAGGCAUGUUAGCACUUUGGGCAGAAGAGACUGAUUUUGAAAUUCUGUAA
rno-novel-mir-1827	chr15:+:19604144:19604253	GGGCAGCCCUCCAAGCUCCCACCCCAAGCCAGAACAAAGCACUUUGCUCUGGCCUGGGCUUUAAAAGUGUCCUCUUAACCUCCCCUUCUGCCCAUGGUCAUGACUAGGCA
rno-novel-mir-1828	chr15:+:19690086:19690196	CUGGGAUUGGCUGUGGCGCGUGGGUUGGGGCGGGAGGAGACGGUUAUGGGCUCGAGCCUGGGCCGGAUUCCGGCUGUCUGAGGGGCGCGGAGACCUGCAGGAGGGAGACGG
rno-novel-mir-1829	chr15:+:19706386:19706499	UGGCCCAGGUGAAAGCACUGUGUGAGAUCUGCAGUGUGUGUUCUUCAAGUAUACGGAAGACAGACAGAACCACCUCAGCAUCUCACAGAGCAGUGCUCUGCCCUGUCCACCUUC
rno-novel-mir-1830	chr15:+:23402787:23402894	GCCACUGAAGGAGAGUAAGUGGCCGAAGAUCCAACAGGAGCUCCAUGGCAGUUCUUUUGGUCUCAUAAGAGUGCUGGUGUUGGGUUUGGUCUUUGGCCAACAGGUCUU
rno-novel-mir-1831	chr15:+:24056220:24056327	GUGGAAGCUGAACCCGGAAGUGGCGGCGGUCCCUGGAGAGCAGGCGGAGACAGCGGCAAGCUGACACUGGGCUGACCGUGGAGCUGGGGCGGGGGCUGACAGAGAGGC
rno-novel-mir-1832	chr15:+:24442882:24442989	GUUGCUAGGUAACUGUGGGGCGGAGCCAAGAUCAAUGACAACCUUAGGGCUUCUGGGUUUUUGUCUGGCAAGUAAGGAACUUAGAAGCCACUGCUCUGUUCUACCUGA
rno-novel-mir-1833	chr15:+:24442932:24443039	UUCUGGGUUUUUGUCUGGCAAGUAAGGAACUUAGAAGCCACUGCUCUGUUCUACCUGACCAAAUGAAAACCCAACACCUCAUCUUAGAUCCACUUAGAGAAUGAGGUU
rno-novel-mir-1834	chr15:+:25149322:25149433	UUUCUCGCUGUAGAAGACGCUCUCUUUGCCCAGUCAGCCAUAUCUUCAGGAAAACUCAUCUCCAGUGAGUUUUCCUGAAGACAUGGCUGACUGUUGUUUUCAAGGCCUUUCC
rno-novel-mir-1835	chr15:+:2548269:2548380	GCCCAGGGCUCUGGCUGCCUUUUUGGCGAGUGUAGUCUGCACGGGCAGUCUUGGUGAGGCGGUUUAGCCCUUACUGAUAUUGCUUGUGCCGUUCUUUCAGCCACUGUAUACA
rno-novel-mir-1836	chr15:+:27991217:27991325	CAUCUUACGGCAGAUGUCCUUGAUCCGGGUUGAGUCUACAGAGACCUCGCCAAGAUGUCCUGUGCACAGAGCCGGGCAAGCAGGGUCUUUGUUGCCCUUCUUGGACCUG
rno-novel-mir-1837	chr15:+:27991267:27991375	CAAGAUGUCCUGUGCACAGAGCCGGGCAAGCAGGGUCUUUGUUGCCCUUCUUGGACCUGCGUCUCCCCGUACUCCCUGGGCACCAGUCCUCAGACUUUCUAUGGUGGCU
rno-novel-mir-1838	chr15:+:28166382:28166492	UUAAUAAAAAUUAAAAUUAACCGCCCUGUGGUUGCUGGAGGCUGUCUUGCUGGUACAGUUCUCCAGUGGAUACAAUGGGCUAGAGAAACCCUGUGAUGUAUGCAUGGGAGC
rno-novel-mir-1839	chr15:+:28313981:28314088	GGGAGCACACAGAGGUGAUGCUUGUAGGCUCCCCGAGUGCUCCCCACAACCCCGAGCCGCGUGAAAUGGGGUGUGCUUGGGGACCCCUUAAGCCUCCAAAUGAUCCCC
rno-novel-mir-1840	chr15:+:28672646:28672754	AGGGUGGGCGGGCCUGAGGCUGGGAAGGGUACGUAGGCAACCGCAGAUAUGCCUGAUUGGAAAUAGGAACCGGCGGCGGAAUGGCAGGACCCGCCUCUGACCCCCACCA
rno-novel-mir-1841	chr15:+:30097783:30097892	CUCAGGACGAGGGUGGUCGUUCAUCCCGGACGAGCCCCCAAAUGAAAGACCCCCAGAACGGGGAGACCCUCACUCAAGUCUCGGGAUGAUACGACCCCCCAAGAACUCAC
rno-novel-mir-1842	chr15:+:31842924:31843037	AUGAAGACACUGACUGGAUCUUUGUUCCUGUUCUUCUGGCUGCAGCUGAAUUGUGAGUGAGAGCUUUGGGGGAACAAGGUGUUUGUCAGUGUUCAUUAUCAGUCUGUGGAGCAG
rno-novel-mir-1843	chr15:+:32386766:32386879	AUCACAGAAGCAUCCUGUCUGGCUGGAGGCCACAGUCCAGAGGGAGAGCAAUGAAGACACUGACUGGGUCUUUGUUCCUGUUCUUCUGGCUGCAGCUGAACUGUGAGUGAGAGC
rno-novel-mir-1844	chr15:+:32386816:32386929	AUGAAGACACUGACUGGGUCUUUGUUCCUGUUCUUCUGGCUGCAGCUGAACUGUGAGUGAGAGCUUUGGGGGAACAAGAUGUUUGUCAGUGUUCAUUAUCAGUCUGUGGAGCAG
rno-novel-mir-1845	chr15:+:32894986:32895093	ACCCGGCAGGGCUUGUUUACUAUGGCUGAUGAUCUGGAGCAGCAGUGAGUUACUCCUGUCCGUUUUUCUUUCUGUCUCUGUCUAUCUGUCCGGGCCAGGAUCCGGGGA
rno-novel-mir-1846	chr15:+:33052427:33052537	UGCGAAAGGGGCAGCUAGGAGCUCCUGGCUCAGCACUUUCUGUGAUAAGAAGGUGCUCGGUCAGGAUUCUCCUUUGUCGGUUCUGCCCCAGGACAGGAGGCCCGGAGGAAG
rno-novel-mir-1847	chr15:+:33069559:33069669	GGUUUCUUUGCUCCAGCAUGGCUGCCUUAGGGACCUGGCUAUCCAGUGAGUGAUUGUGAGGUUGGGAACCCGGGGGCCGCGGGGCAACAGACCUCUAACUCGCUACUCUUC
rno-novel-mir-1848	chr15:+:33519126:33519233	CGCGAUUGGCUGCGGGGAAUCGGUCAGUGUAGGCGCGUGGGGCUGAGAACAUGUCUUCCUGGGCAAGGCGCCUGUAGUGGACCUCUGCACCCUGUGGUCCAUCCAAAG
rno-novel-mir-1849	chr15:+:33519686:33519796	GGUAUUCUCAGACCUCAGUAGGUAAGGCUUUUCCGUACCUAUUUGUCGCAUAAACUUUUCUUGAAAGAACAAAUGGAAGCGGAAAAGAUGGCUCAGAGGUUAAGAGCUCAU
rno-novel-mir-1850	chr15:+:33559566:33559674	UGGGGAGUAGGGGAAGGCCCAGGGAGUGGGGCAGGGGCUACAUAUUCCCUCUGGGGAUUCGCCAUGGACACAUCUCAACUGUGCAAGCUGCUCCCUGUUUCCCUGCUCC
rno-novel-mir-1851	chr15:+:33600039:33600146	AAAAGAGAGAAAGGCUUAGCCAAAUAAGAGGGUUAAGGUUAUGGGAGGGGGCAUAAACGUCUUCAGGCUUUGGUUGCUGGGAACUCCUUGCUCUGCCUGUCUCUCUCC
rno-novel-mir-1852	chr15:+:33677574:33677684	GAUUGUCUAUCAAAACUAUGAACUCAGGUUAGCUCCCAGGAAGUUCGGGCCCGGAAAGGGUGGGCUUUGCGAAGAUGGAGGCUCCGGUGAGUUCUGUCUCGUUGCUUCUUC
rno-novel-mir-1853	chr15:+:33719981:33720089	AUUAAACCUAUCCUGUGCCACUCGGGCUAGAUUUGGGGAUUGCCAAAAUUACCCACUAGAACUGAGAUGGGGGGGCUCCCCCCCAGGACACUGUUCUCCUGUUUUGUCC
rno-novel-mir-1854	chr15:+:34155561:34155668	UAGACCAGCCUCCUGUCCUUUGAACGUCCCCUCCCCUAGCAGAGUUCAACCCAGCUUCCGGAUCUGAACUAUGCAGAAAGCGGGACUGCUGUUAAGAGGCUGGACUCG
rno-novel-mir-1855	chr15:+:34234730:34234837	GCAAGGGGUUUUGAUUGGUCAGUCGGAGAGGUUAUCUGGGAUUCGGCCACCCUGGGCCGGGGACUUUGAUAGGUGAGUUUGGCUAGGAAAAUGAGAAAUUCCUCUUCA
rno-novel-mir-1856	chr15:+:37156195:37156302	GGAGGGCGGGGCUUCCCGGGGCUCCGCCGCGCCGCCGCCUCCUCUGCCUCCUCCUCACCAUCGCUAAAGCCGGGACUGGACCGAGCGGAGUUGUGCGUGUCGCCGAAG
rno-novel-mir-1857	chr15:+:3717920:3718031	GCCCAGGGCUCUGGCUGCCUUUUUGGCGAGUGUAGUCUGCACGGGCAGUCUUGGUGAGGCGGUUUAGCCCUUACUGAUAUUGCUUGUGCCGUUCUUUCAGCCACUGUAUACA
rno-novel-mir-1858	chr15:+:3741779:3741892	CCUCGGAAGGGACAUUGGGAUAUGGAGCGUUUUCUAAUGAAGGAGCAAGGGUGGAGUAGAGCAUCUCUGAUUGCUCUGGGCAAUUCCUGUUCCUCAGCAUCCGAGGGCUGAUCA
rno-novel-mir-1859	chr15:+:37769702:37769814	UCACUCCCCUCCCAGCCAGCCCUGGAAUCCCUGCAGGCACACCAGAGUCGGAUCUGUGGCCUGGUGGGAUUGCUGUUGGCAUGGCUGUGUCCCUGGGGGCUUUCUUCUGCAAC
rno-novel-mir-1860	chr15:+:37769702:37769815	UCACUCCCCUCCCAGCCAGCCCUGGAAUCCCUGCAGGCACACCAGAGUCGGAUCUGUGGCCUGGUGGGAUUGCUGUUGGCAUGGCUGUGUCCCUGGGGGCUUUCUUCUGCAACU
rno-novel-mir-1861	chr15:+:38097001:38097111	UGUACGCGGAACUCUAAGGGAACCUCUCCGUGGUCAGUUCGUACGCGAGGUGGGUUUUCGGGGAGGUCCCCUCUUUCCCAGUAGUGUAGUCGGCUCCUGGUCACUCACUUC
rno-novel-mir-1862	chr15:+:3936750:3936859	CCGUCUCCUCCUCUUGCUCCCUCGGCCGGGCGGCGGUGACUGUGCACCGCCGCGUCCGCCCGCCCGCCAGUAUGGCCACCACCGCCACCUGCACCCGCUUCACCGACGAC
rno-novel-mir-1863	chr15:+:39501068:39501175	AGUCACCAUCGAGGUAGGGAAUGGACCUGGUGGCUGAGUACCCAUUGGCCUACCAUUUGUGCAGCUCCGGGCUCAUUCUCAUCAUUGAAAAGUGCAAAAUAAGAUAAA
rno-novel-mir-1864	chr15:+:3963659:3963770	GCCCAGGGCUCUGGCUGCCUUUUUGGCGAGUGUAGUCUGCACGGGCAGUCUUGGUGAGGCGGUUUAGCCCUUACUGAUAUUGCUUGUGCCGUUCUUUCAGCCACUGUAUACA
rno-novel-mir-1865	chr15:+:3987518:3987631	CCUCGGAAGGGACAUUGGGAUAUGGAGCGUUUUCUAAUGAAGGAGCAAGGGUGGAGUAGAGCAUCUCUGAUUGCUCUGGGCAAUUCCUGUUCCUCAGCAUCCGAGGGCUGAUCA
rno-novel-mir-1866	chr15:+:4034430:4034537	GCGACGCCAUUCGGCGCGCUCCCGGAGCGGAGGUGCGGGCCGGCGCAAAUAGGCCGCCCCAGGCAGCCACUGCAACGGCAGCGGAUAGUCCGAGUGGCGGCUGAAGGU
rno-novel-mir-1867	chr15:+:4034751:4034860	ACACUCUAUGCGCUCCGAGUCACCUGGGAAGUGCGGAAACAGGCCUGGACUCCACCACAGCAACACUGGUAGGUCCACGGUCUCUGCGUUCCCCGGCGGCGGUGAUCCCA
rno-novel-mir-1868	chr15:+:40466865:40466972	CUGGCCCAGCAGCGCGGGGGCGGGGACCCGCCCGAGGCUGCGCCGCCCGCCGGAGUCCUGGCAGGUGGCUGGGGAGACUCCGGUAGGGCUGCGGGUCUGGCUGCGGGC
rno-novel-mir-1869	chr15:+:40545517:40545624	CUCCCCGAACAUUCACAGCCCUGCGGGGAUCGUAAGGAAGCCAGGCAGUCUGAAGCCAGGCCUCUACAUGCCGAUCCUCGCGGGAGAGCACCACAGUAGCAAAGGCUA
rno-novel-mir-1870	chr15:+:40699609:40699719	AAGCUCAGAGGGUGCUGUAAACCGUGGGAAGGAAAAGGAUGGAGGGCCGGUCUUCUGGAAGAAGGAACGUCUUCCCUUCCAUCUCUCCUCCUUUCCCUUCCUCCCCUCCUA
rno-novel-mir-1871	chr15:+:4071878:4071985	CUAAACCCGGGUCUCGAGGGCUCCCUGACGGGCUAGUGAAUGGAUCGACCUCUAUGGUUGGGAUUCCUGAGCUCCCAAGGCUGCAGGGGAGGGGUGGGGAGCUAUUUG
rno-novel-mir-1872	chr15:+:40937607:40937714	UCAGGGGAGCAGUGUGGAGGCGUGGCUUCGGGAGCGGUCUGGGGGCGUGGCCGUGGGAGGAGGCGUCUGAGCGCGGGAGGGCGGAAUCAGCGCUGCUCUUUCUGUGGA
rno-novel-mir-1873	chr15:+:41037476:41037585	UUUCUUCCUUGUUUGGAUAGUGUUCUUCAGGACAGGGAUGUGGUUAUGGUUUCUGUCUCUGGCAGACUAUCCAACAAGACUAGAGUGAGUGACAGGCUCAAUCACAGCAC
rno-novel-mir-1874	chr15:+:42665639:42665747	AUCAGUUUUCUAUAUGUAGGAGUCUCAAGGAGGGAAUCUCCCAGCUUUCCGAGGUUGCUGCAGACCCCUAGAGAACUCCACAUGUCUCCAGCGCCUAGGCCUCCACCCC
rno-novel-mir-1875	chr15:+:42945889:42946002	UCCAUCCCAGAGUGGAGGCACCCUGGGAAGUUUCAAGCAGCCUGAGGUUCCAAGCUUUGCUCCAGGGAGUAGUUGCCAAGGCAGCCUGAGCACGCCUUCCCAGACCUGGGGAUC
rno-novel-mir-1876	chr15:+:43025588:43025697	UUGUGACACUGUCCACUGACUGCAGACUUGGGCCAAGGCCCCCGCUUUUCACGGCUCUGCCUGGACAUUCGGCCUCCAGGUUCCUAGUGGAGAGAAGAUGUGACAGAAGU
rno-novel-mir-1877	chr15:+:4305222:4305333	CGUGGGGCGCGUCUCUGCGGCUUUCAUAGGUGUUGGUGCUGGUGUUGGUUUAAACUUCAGGAGUUGUUUAUUUUGGGUUUAUUUAAGCACAGCAUAAUCAGGUGAGAGCUAU
rno-novel-mir-1878	chr15:+:43587721:43587831	UCCGGCUGGAGACUCUGCUCCGGAGAGCUGUGGAAAAAAGGGCCAUCCCCCGGAACAUUGCUGACCAGGUACGUCUGGAGCAGGUCAUGGCUGGAGCCAACCUUAGCAACG
rno-novel-mir-1879	chr15:+:44801875:44801988	CAUGAACACAUCCAUUGUUGGUCUAACUGUACCCUUCAUUCCCUUCCCCACCAGGAAACUCUUGGAAGGCGAAGAAACCAGGCUCAGUUUCACCAGCGUGGGUAGCAUAACCAG
rno-novel-mir-1880	chr15:+:4658286:4658393	GAGCCGGUUUGGUAGCCCAGCCUUCCACGUCGAGCCAGAGCGUGCAGGUCUCAGGAACGAAGGCUGAGCCAGCGGCGGCGACCUCAAAGACAGCCACGGGCUGGCUGA
rno-novel-mir-1881	chr15:+:47142670:47142780	UUGACCCUCCAUUCAGCCAUCUGAGCCUGUGCAGGGGAGGGAGGUAGCCUUUCAGAGCCCCAACAGGAGAAUGCCUACCUCCUCCCCAUGUGGGUAUGGCCAUCCAGUGAG
rno-novel-mir-1882	chr15:+:4748555:4748665	AGGAAAACAAGCUGAAUGUAAGAAGUGGUUUGCUUCGCCAGCUCCGCAGUCCGGCAGGGCUGAGUUGCAGUCAGCUGGGCUGUGAAGCUGCAGUCUGGGCACCCGAGCGUG
rno-novel-mir-1883	chr15:+:47955737:47955846	CAUUAGGCUUCAUCCUGCAAUCUAGGUCAGGAUGGAGCGAUGGGACACGGGAUGGCUUUUAAAUCUGCUGUAGGCUCCAGUCAACCUGCUUAGAAGGCACAGGAGGCCCA
rno-novel-mir-1884	chr15:+:47962066:47962176	CCUGCGCUAGCAUCCUUUCCCCUCGGCCACGGCCACCAGCAGUGCAGUUUCUUCUGCACGCAAGCUCUGGUUCACCAAAGGAGGAUUCUGGUUUUUUGCUAUUUUUGUUUU
rno-novel-mir-1885	chr15:+:47962071:47962178	GCUAGCAUCCUUUCCCCUCGGCCACGGCCACCAGCAGUGCAGUUUCUUCUGCACGCAAGCUCUGGUUCACCAAAGGAGGAUUCUGGUUUUUUGCUAUUUUUGUUUUGU
rno-novel-mir-1886	chr15:+:47963972:47964081	GGCUGUUAUCUCAUUGUCUGUGACUGGGGGAGCUGCGGUAGGAAGGAUGCGGUGGUCCUUAGCUCAUCGCGUUCCCCAAACCCCACACCCUCUCUGCUGUCAGUGCGCAC
rno-novel-mir-1887	chr15:+:4882925:4883032	GUCAUCGCCCCGCCCCCUCGCCGCGUCGCCGGUGCCUGCGCCGCCCGCCUCACCUCGCUUCUCCUGUCCCGGCGGAGGCCCGGGCGGCCAGCGCGAGCAGCGGGGACC
rno-novel-mir-1888	chr15:+:4882929:4883040	UCGCCCCGCCCCCUCGCCGCGUCGCCGGUGCCUGCGCCGCCCGCCUCACCUCGCUUCUCCUGUCCCGGCGGAGGCCCGGGCGGCCAGCGCGAGCAGCGGGGACCAUGUUCCG
rno-novel-mir-1889	chr15:+:48880088:48880200	UCAAAUAAUGCCAGCAGCCACGGGGUGAAGUGAUCUGUGGCACUGUCCUGUGAGAUACACAAGGGGCAUAGAGCAUUUUACACUGACAGCUGCUACACCGAUUACAACAAGGC
rno-novel-mir-1890	chr15:+:49005087:49005194	ACCGUAAAGCUCUCCCCAGAAGGCGGAGCUUGGAGCCCCGCCCUGUUUAGGUGGCGGCUCUCAGCUCUCCUAGACUGGGAAGGGGAUGCGCACUGUGAUUUUGUGGGA
rno-novel-mir-1891	chr15:+:51400864:51400971	UGGGCUUAAGGUUAACCAAAUUAGUGCUACUGGAUCUGCAGGUAGAUCGCGAACUGUCGAUCUGUUUUAGCGCUCCUAGCCCAGAGACUUUAAAAUUAAACAAACGCC
rno-novel-mir-1892	chr15:+:51756866:51756973	UCCCCUGCACCACGGAUCGCCUCUCGGAUGCCGCUAGCCUGGAAGCUGCGUUAGGAACAGGCGGCGGCGGUGGCGGCGGCGGCGGCGGUGGCGGCUGUAGCUCGGGAG
rno-novel-mir-1893	chr15:+:51757595:51757702	ACGGUGGGAGAGGUACUGCGACGCUGCCUUUCCGGGGCGUUCAGCAAAGCCAUUGGGGGUGUGGGUACGGCGGGGAGAGGGAGGGGGCUCACCCACGGGGCGGGGGAA
rno-novel-mir-1894	chr15:+:51965693:51965802	CAGGGCCCAUGUGACAGCUUACAACAGCCUGUAACUCCAGUUCCUGAGGAUCCAACAUUCCUCUUAUGGCCUCUGAGAGCUACAGGCAUGUACGUGGUGAACAUACGUAC
rno-novel-mir-1895	chr15:+:52158711:52158821	GUGGGCACCAGCUCAUGAGCCUGUCCACUGCUGAUGCCAAGAAAGAUCCCAGCUGCAAGACCUGCAAUAUCAGUGUGGGCCGCUAGGGACUCCUGGGGAGCUGGAGGGCUG
rno-novel-mir-1896	chr15:+:52158761:52158871	AGCUGCAAGACCUGCAAUAUCAGUGUGGGCCGCUAGGGACUCCUGGGGAGCUGGAGGGCUGGGGAGAGAUGACAGCAGGGUGGGGCAUGAUAUAUGGCUUAGGUUUGGGGA
rno-novel-mir-1897	chr15:+:52234768:52234875	CUUUUGUCUCCCUGACCUCGUCCCGCCCCUCUGAAGGCUUCAUUGCGCUUGCGUCUGGAGCUUGAGCUCUGGGGUUGGGCAGGACCUGGUUCCGUGCAACUUUCAAGU
rno-novel-mir-1898	chr15:+:52315220:52315327	GUGUAUUGUAGGGUGGGGUGAGACACAGGACAGCAGGGUUUGGGCCUGCUGAGGCCAGUGGCUCACCAAAAGCCUUAAGUCAAGUUUACCAUUGGCCUUUCUUCAAGU
rno-novel-mir-1899	chr15:+:52777119:52777229	GUGGGCACCAGCUCAUGAGCCUGUCCACUGCUGAUGCCAAGAAAGAUCCCAGCUGCAAGACCUGCAAUAUCAGUGUGGGCCGCUAGGGACUCCUGGGGAGCUGGAGGGCUG
rno-novel-mir-1900	chr15:+:52777169:52777279	AGCUGCAAGACCUGCAAUAUCAGUGUGGGCCGCUAGGGACUCCUGGGGAGCUGGAGGGCUGGGGAGAGAUGACAGCAGGGUGGGGCAUGAUAUAUGGCUUAGGUUUGGGGA
rno-novel-mir-1901	chr15:+:5308364:5308471	GCACACAUGUAACACGCAUGUGCACACACAGGCACACACACAUAUAACACACACAGACACACGCACACAUAUGUGUCUGCUGGUGUGUGUUUCAUAUGCGUGCUUGUG
rno-novel-mir-1902	chr15:+:57257304:57257413	UUGUCCGAGGGAACCCCAAGUUGAACCUGGCCUUCAUUGCCAACCUCUUUAACAAAUACCCUGCCUUGCACAAACCGGAGAACCAGGACAUUGACUGGGGGGCUCUCGAA
rno-novel-mir-1903	chr15:+:58658216:58658327	UCAACAGCAGUUUGCCUAGUAAAGUCUCGGAGUGAACACCAGUGGUUUGCCUCAAGAAGGGAGAGUGGACAUUGCUUUGCUUGGGGGAGGGGGAGGCGCUCGUUCUCUUGUG
rno-novel-mir-1904	chr15:+:59331076:59331186	AGGCGCGCGUGCGCACGCCCGCGCGCCCCGAGCCGCGGAGUCUCCAGCGCCCCUGAGCAGAUCCCACUCUCCCGGGCGCUGCUACUCACACAGGCUUCUAGCCGCCACGGG
rno-novel-mir-1905	chr15:+:60950045:60950152	GGUGGCUUUUUAGAUAGGGCGUCUCCCUUCAUGGCCUUGACUAUACACCAGGCUGACUUUGACCUCAUAGAGACUGGGCUUAAAGGUGUGUACGCUGGGGACCAGCCA
rno-novel-mir-1906	chr15:+:61515509:61515616	AGAGAUCUCAGGGAAGAGCCAGGACCAGGAGGGAACCCAGCAUGGCGCUGUGUGGAUUUCACAUUCCCAGGCCACAGGUCUCCUGGCACUGGGGGCUCUGUAACCUCA
rno-novel-mir-1907	chr15:+:6364829:6364940	AUGUGGCUAUAAUUUCAUUCAACAAUGGGAAACUCAGGUAGAGACUGACCACACCUGUCCAGACAUCCCAGGGAAUGACAGUCUCUCCUGCAAGCUUUCCCUUGUUGAAAGU
rno-novel-mir-1908	chr15:+:66966225:66966333	UGUGCUGCUUCUAUGCAGUAGCCUCUUGCCAUUGAUGAUCGUGCUUCUCUCCUUUGGAAGGUAAGAGGGAGGGAAUGCAGUCUGAGUGGCAAAAUAAAAGAAAGUAUGA
rno-novel-mir-1909	chr15:+:67553610:67553721	GAGUCAGUCAGCAAGAGACGCUGGGGAGAGAAUCCGGACUGCGAGCCCGGCGGCUGCCGCAGCGGAGGAGGGCAGCUCGGAAACGCUACUCCAACUGUUGAAUUGAAUUUUC
rno-novel-mir-1910	chr15:+:67553611:67553718	AGUCAGUCAGCAAGAGACGCUGGGGAGAGAAUCCGGACUGCGAGCCCGGCGGCUGCCGCAGCGGAGGAGGGCAGCUCGGAAACGCUACUCCAACUGUUGAAUUGAAUU
rno-novel-mir-1911	chr15:+:67553613:67553721	UCAGUCAGCAAGAGACGCUGGGGAGAGAAUCCGGACUGCGAGCCCGGCGGCUGCCGCAGCGGAGGAGGGCAGCUCGGAAACGCUACUCCAACUGUUGAAUUGAAUUUUC
rno-novel-mir-1912	chr15:+:70731693:70731804	CUAAGUACAGGAUUAGGGUGCCUAGCUCACCCAUCUGUCGGCUGGGACUCAGAGGGGGCUCGAGUUGCAGUCUUUUGAGUCUCAGCCGACCACUAGGCCGGGUGAAUGGAGC
rno-novel-mir-1913	chr15:+:7860673:7860784	GAGCUGCUGUGAUGUGCUACCUUCCCCCCUGUGUCUCAGCCUUAGCCUGUCAGAUGCUGCUCCAGCCAGGACUGAGGCGGGGACACCGGGACACCGUCUCAGAGUGAGAUGC
rno-novel-mir-1914	chr15:+:82585393:82585506	AAAAAUGCUUUAUUCUUCUCUCCUCCAACAUCUUUGCUCUUUGUUAAACUUAGUAACAGAGAAAAGAGUGUUGGAAACAUGAGUGGGUGAAUCUUCCAAGCACUUCAGAAGAGU
rno-novel-mir-1915	chr15:+:84249402:84249509	UCACUGUCCCAGCACUGUGGUUGCUGGGAAGGGAAGGAGGUUUACUACCCAUCACCACUCCUGUGCUCUCUCCUGUCUUCCUCCCUGCAUCCCAUUGGUGCUCAAUGU
rno-novel-mir-1916	chr15:+:86153668:86153779	GGCUGCUGUCAGAGCUGGAGCGCGGCCGGCUGAGCAGUCAUGGAGGGUCAGCGCUGGCUGCCGCUGGAGGCCAACCCUGAGGUGAGCGCGGCCGGCCGGGUUCCGCAGCCGG
rno-novel-mir-1917	chr15:+:87540883:87540991	GCGGAGCGGUGCCAAAGCGACGUGAAAUCCGCUGCUCCGGGUUUUACUAGCAGCACGAGGAAGAGCCUGGACCCUGCUGGGGAAGCUGUCAGUGGAGGCGCUCUUCAGG
rno-novel-mir-1918	chr15:+:87890579:87890688	UAAGACCUUAAAGCUCCCACUGCAGGCAGAUGGUGCUGCAUUCUCCGUGCUACUGGAUGGCGUGACACCAUGUGGCAGCUGGAGGAUGACACUAGGCACCACAGUGGGGU
rno-novel-mir-1919	chr15:+:9620876:9620984	GCACAAAGGCCGGGGCUCCCGCUGGUGGCUGGUGGCGGCGGCGGCAGGGGCUGAGGGCACAGCCAGCGGGCGGCGCGCCGUGGACUCCCAGCAGCCCGCGAAAGGUAAA
rno-novel-mir-1920	chr15:+:96933237:96933344	AGAGAGUAUGUUGAUGUCCAUGGAGGACUGUGCUGUCAUCUAGGGCUAUGGAUCAUCCAAGGACCAUGCUGCAGCAGAGGGCCAUGUUGAUAUCUGUGGUCUGUAAGG
rno-novel-mir-1921	chr15:+:98619506:98619613	UCACUGCAGGAUCCGGCCCCGGGGCUGGCGCUGAAAUGCAGGUGACAUUGUUACUGCGAGCUUCUCUGCCCUAGGUGCACCCGAGUGAUGAAGGGAGAUCCAGAAAGU
rno-novel-mir-1922	chr15:+:98642446:98642553	UCACUGCAGGAUCCGGCCCCGGGGCUGGCGCUGAAAUGCAGGUGACAUUGUUACUGCGAGCUUCUCUGCCCUAGGUGCACCCGAGUGAUGAAGGGAGAUCCAGAAAGU
rno-novel-mir-1923	chr15:-:105223631:105223738	CUGUGUUCCCCUUUCUGUGGCAGUGAAAAUGUCCCUUCUUACUCAGCGCAGAAACUGCACAGAAGGCGGGACUCUGAGAGAGAGGGGACAAAAGAGGGAUCCCGGGAC
rno-novel-mir-1924	chr15:-:107973902:107974009	UGGACUUUGGAAGGCAGAGCGCUACGAGCUGAUUGCUGACAUCUAUAAACUCAUCAUCCCCAUCUAUGAAAAGCGGAGGGACUUUGAGGUACGUGCCUGUCUUCCUGU
rno-novel-mir-1925	chr15:-:12514909:12515020	UGCCCCUGGCAGCUUUGGUUUCUCGGCGUCCGCACAGUGGCGGCUUCCCAUUCAUGCUCCAGCUACUGUGCAGCCGCCUGCGAGCCCAGAGCGAAGCGCUGGUGUCGGGGCU
rno-novel-mir-1926	chr15:-:12514911:12515020	UGCCCCUGGCAGCUUUGGUUUCUCGGCGUCCGCACAGUGGCGGCUUCCCAUUCAUGCUCCAGCUACUGUGCAGCCGCCUGCGAGCCCAGAGCGAAGCGCUGGUGUCGGGG
rno-novel-mir-1927	chr15:-:12514920:12515030	UUUUCACACCUGCCCCUGGCAGCUUUGGUUUCUCGGCGUCCGCACAGUGGCGGCUUCCCAUUCAUGCUCCAGCUACUGUGCAGCCGCCUGCGAGCCCAGAGCGAAGCGCUG
rno-novel-mir-1928	chr15:-:14630296:14630409	AAGAAGAUUUCUGACUAAUCUUCCCAAGUGACUGAACUCCAACUCUAUUGUCUGUGAGUUGGGGAGAAAUACUUGGGAGAAAGAAGAGAGAUGUAAUGUAUCAAAGAGCUAUGU
rno-novel-mir-1929	chr15:-:17934654:17934763	GAAAGGAAAAAAGAGGAAUUUGGUAGGAGGGCCAUCUGAGUGCUUCCCCAUUUACCAUGGGCUUCCUCAAACCCUCAGAGCCUUCCAAAUGGAGAGGUGAUGGCUGCCUU
rno-novel-mir-1930	chr15:-:18695018:18695128	CUGGAGGGCGGCGAUCCGGCAGCAGGACCUCGGCCACUGAGGUAGGUCUGGUGAGCGAGGUGGAAGGGAAGGCGACGGUGGCUACGUUCUUAGAGGGAUGGCAGCCUCCCA
rno-novel-mir-1931	chr15:-:19627358:19627467	AGAAAUGGGGUCAUAAUGUCACAGAGUUUCAGCAGCGCUUUGAUGGGGUUUUGACAGAAGGAGAAGGCCCCAGGAGGCUGAAGAACCUGUACUUUCUUUACCUGAUAGAG
rno-novel-mir-1932	chr15:-:20032128:20032235	AGGCGGAGUCGCCUCGGCCGCAGCUGCUGCCCUGCUGGGGAUUUGAAAGAUUAUAAAGUCCGGGCCCAGAGGGCGGCGGCAUCGGAUGCGCGUGUGGCGGAAGCGCCG
rno-novel-mir-1933	chr15:-:26157107:26157217	GCUGCACACUUUGUCUCUACCUUGGGGUUCUUCAAUUUGAUCUUUAUCUCCUUCACGCCCAUCAUCCUGUAUUUCACCAAGGUGGAGCACUGGUCCUCCUUUGCUGCACUG
rno-novel-mir-1934	chr15:-:27855807:27855917	CUGACCAAGCGGGAGUCGCCAUGGCGGCAGACGGAGAGCGCUCCCCGCUGCUCUCCGAGGCCGGCGAUGGCGGCGCUGGUGGCAACGGCUUAGCGGGUCCGGGCGGGAGCG
rno-novel-mir-1935	chr15:-:28286993:28287100	AUGUGGGAGGGGCUUAGUCUCCAGAAGGGGCGUGACCUCAGUGCUGCGCGUAUCUUGGAGCCGGGCCAACCGGACUAGGGCUGGAGCGUGUUUUGUGAGGGGUUGGGG
rno-novel-mir-1936	chr15:-:28404139:28404249	AGAGCUGGGCCCGAGGCAGGUCACUGGGCUCUCUGACUUCCCUACAUCCCAACCCGGGUGAGGGGUCAGGACAGUCUGCACCUGCUGUGGGGGCCCAGGCAAGAUCUACGG
rno-novel-mir-1937	chr15:-:28611914:28612025	AGCGGAAGGGGAUACCGAGCGGUCGGUACUUCCGGGUCACAGAGAGUGCGGGAUUCCGGGCCGAGCGCGGGUGGCGGAGCUGGGACCUCGCGUGAUUCUCGGAGCCCGACGG
rno-novel-mir-1938	chr15:-:29369391:29369504	AUGAAGACACUGACUGGAUCUUUGUUCCUGUUCUUCUGGCUGCAGCUGAACUGUGAGUGAGAGCUUUGGGGGAACAAGGUGUUUGUCAGUGUUCAUUAUCAGUCUGAGGAGCAG
rno-novel-mir-1939	chr15:-:29369441:29369554	GAUCACAGAGCAUCCUGUCUGACUGAAGGCCACAGUCCAGAGGGAGAGCAAUGAAGACACUGACUGGAUCUUUGUUCCUGUUCUUCUGGCUGCAGCUGAACUGUGAGUGAGAGC
rno-novel-mir-1940	chr15:-:29639215:29639328	AUGAAGACACUGACUGGAUCUUUGUUCCUGUUCUUCUGGCUGCAGCUGAAUUGUGAGUGAGAGCUUUGGGGGAACAAGGUGUUUGUCAGUGUUCAUUAUCAGUCUGUGGAGCAG
rno-novel-mir-1941	chr15:-:29639265:29639378	GAUCACAGAAGCAUCCUGUCUGACUGAAGGCCACAGUCCAGAGGAGAGCAAUGAAGACACUGACUGGAUCUUUGUUCCUGUUCUUCUGGCUGCAGCUGAAUUGUGAGUGAGAGC
rno-novel-mir-1942	chr15:-:33332948:33333057	ACCUCACGCAAGAUGGCGGAGCUGGAGGAGGUGACUCUGGACGGGAAGCCUCUUCAGGCUCUGCGGGUGACCGACCUGAAGGCCGCACUGGAGCAGCGAGGCCUAGCCAA
rno-novel-mir-1943	chr15:-:33635393:33635507	GGUGCUGCCCCCUAGGUCAGUGCACUCUCACCUUCUUCCCUCCUCUGCCCUCCAGACAGAGGAAGACAGGAAGAACCUACUGCGACUGCAGGACCUGGUGGACAAGCUGCAGUUA
rno-novel-mir-1944	chr15:-:33721735:33721846	GCCUAUCUGCACCUACCACUGCCUGGCCUGUGAGGUGCUGCUGAGUGGGCGUGAAGCCCUAGCCUCCCAUCUGCGCUCCUCAGCCCACAGGCGCAAGGCAGCCCCGCCCCCA
rno-novel-mir-1945	chr15:-:33759283:33759392	AAUCCUAACAAGGUGAGUUGUUAGAUCCUGUGGCUAAGAGGGGCAGGAGAGGUCUGAGCCCUGACCCUGGUCUCUGCUUCCCUGCUUUUAGGCCCCUUUGCGACUAAAGC
rno-novel-mir-1946	chr15:-:34168334:34168441	CUCAAGGGCCAGUUCCGGGGCGGGGCCGGGAGGAGGGAGGGUGUUGAGAUAAGCAGCAGUCAGGACCAGGGGCAGCUCCCAACGCCUGGCCCCGCCCGGCGAGGGUGG
rno-novel-mir-1947	chr15:-:34168384:34168491	CUCCCUCCUAUGCCCCACUGGCCUAGGCGCUGCUGGGCUCUCAGGGGCCUCUCAAGGGCCAGUUCCGGGGCGGGGCCGGGAGGAGGGAGGGUGUUGAGAUAAGCAGCA
rno-novel-mir-1948	chr15:-:34187764:34187873	GCCAUGGCCCCCACCAUGCUGCCUGUGGGAUGCAUGCACAGCACCCUCCCCCAGCAGAGUCACCAAGCCUCAGGCAGCAGCAGACAGGGGUACGCCGGCCCGAGUUCAUG
rno-novel-mir-1949	chr15:-:34322014:34322124	GGGCAGAAGCCCAAGGGCAGCUACGGGGCCCUGUGAGGCCACUGGCGCCUCUUUGGCCAGCCGGUACCUCGCAGAGAGGACCCCGGAGCUGCGGCGGGUGCCCCUUCCGGA
rno-novel-mir-1950	chr15:-:34322067:34322174	GUCAGGUCCUCACCAGGUCUACUGCUCCGGCGCCGCUGUCUGGAAGAGCCGGGCAGAAGCCCAAGGGCAGCUACGGGGCCCUGUGAGGCCACUGGCGCCUCUUUGGCC
rno-novel-mir-1951	chr15:-:34363669:34363777	CGCCAGCUGGCUAGUUGUCCGCCGUCGCCAAGUAGAGCACUUCCCGAGAGUGGUCCAGUUUUUGGAGUCCCUUCGCGCUGCUGUCCCUGGCUUGGUUUGCUACCGGCAC
rno-novel-mir-1952	chr15:-:3759828:3759937	GUAAAGAGCACGGCAAGGUCAGACCCUGGAACCCUGGAGGUGGACUGGUGACCGUAACCCAGGUUCCACGUACCUCCAUGUCCAUGUCUGGGUACCUCCGGCCUUUGCUU
rno-novel-mir-1953	chr15:-:3772456:3772568	AUGUAUAAUUUAGUGUGGGUCCAGGGGGGAGGCAGAGACUCUGGUCUUGGCAGCCUCUUCCAGUCCUGCCCUCCUUCCUCCCUAGGGUUCCAUCUGAGCGCUACAGUGGUACC
rno-novel-mir-1954	chr15:-:37788799:37788906	AGAGGUGGGCCAGGUUCUGUCCCUGGCUUGUCCUGUUCUAGGGGUGGGCCAGGUUCUGUCCCUGGCUUGUCCUGUUCUAGGGGUGGGCCAGGUUCUGUCCCUGGCUUG
rno-novel-mir-1955	chr15:-:37829928:37830035	GUGGGUUCUGAACUGCGACGUGGGGUCGGUGGAGACUGCCGCGGCCGAGCCGGGUCCACACUGACCCUUUAAGACUUUCCCAGUAGGGGCUUGUCUGUGCGGGGUCCG
rno-novel-mir-1956	chr15:-:37983576:37983687	UCUGGAAAUAGCCGGCAGCGACUGCAAGAGAUUCGAGAAGGACUGAAGCAGCCGGCCAAGUCUUCCACCCAGGGGCUGCUGGUGGGACCAAACAGUGACACUUCUUCCGACC
rno-novel-mir-1957	chr15:-:38237407:38237520	CUAAAUCUGGUUCCCAGUAUCUAGCUUGGGUCUCGCUGUGCACUUCCUUGCAGCACAGUGGUCCAGCCUGGGCACCAUCUCCCCUUUCUGGAUUAUCUCCUGCUGCACUCCUUU
rno-novel-mir-1958	chr15:-:4005567:4005676	GUAAAGAGCACGGCAAGGUCAGACCCUGGAACCCUGGAGGUGGACUGGUGACCGUAACCCAGGUUCCACGUACCUCCAUGUCCAUGUCUGGGUACCUCCGGCCUUUGCUU
rno-novel-mir-1959	chr15:-:4018196:4018307	UGUAUAAUUUAGUGUGGGUCCAGGGGGGAGGCAGAGACUCUGGUCUUGGCAGCCUCUUCCAGUCCUGCCCUCCUUCCUCCCUAGGGUUCCAUCUGAGCGCUACAGUGGUACC
rno-novel-mir-1960	chr15:-:4018196:4018308	AUGUAUAAUUUAGUGUGGGUCCAGGGGGGAGGCAGAGACUCUGGUCUUGGCAGCCUCUUCCAGUCCUGCCCUCCUUCCUCCCUAGGGUUCCAUCUGAGCGCUACAGUGGUACC
rno-novel-mir-1961	chr15:-:4028936:4029047	UCCUGUUUACCCCACCGGCUCACAGGGACGCUCACUCACUCUAGCACUUUAUGCAACGUGAGCCAGCUGUUCCUGAAUGCUUAGUCUGCUUUCUGCUCAGUGCUGCCCAGAC
rno-novel-mir-1962	chr15:-:40937865:40937975	CGGUCGGUCCCACGAGCCACAAGCAGGAGCUGGCAGCAAGACACCCUCGGGUCACAGAGGCCGUCCUUGGCGCUCAGUUCCUCAGCUAUACCCACUCGAGAGCCCGCGCCC
rno-novel-mir-1963	chr15:-:41961024:41961136	UAUGAUAGCGGAUGUCAGCAAGUGCCCUUAGCAGCACGUAAAUAAUUGGCGUUAAGAUUCGAGAUUAUCUCCAGUAUUGACUGUGCUGCUGAAGUAAGGUUGACAAUACUCCU
rno-novel-mir-1964	chr15:-:41961025:41961136	UAUGAUAGCGGAUGUCAGCAAGUGCCCUUAGCAGCACGUAAAUAAUUGGCGUUAAGAUUCGAGAUUAUCUCCAGUAUUGACUGUGCUGCUGAAGUAAGGUUGACAAUACUCC
rno-novel-mir-1965	chr15:-:4255394:4255501	UCAAGGAAACACCGCUUAGUCCUGUGCAUGGGAAGGUAGCCCUCUAUUUAACCAUGAGGACCAGAAAGUGGUUUAAGUUUGCAGGGGCAAAAUUAUUUAUUCCACUGG
rno-novel-mir-1966	chr15:-:42847928:42848041	UUUCAGGGUCAAUCAGCUCCUGCCCUCUUACCUUCUCCUACAGAAACCUGGAGUCUCGGCGGUCCCACCUCUCAGAAAGCUGUAGCAUAGGUAAGCAUGUUCCCUGAACCCUCG
rno-novel-mir-1967	chr15:-:42847929:42848041	UUUCAGGGUCAAUCAGCUCCUGCCCUCUUACCUUCUCCUACAGAAACCUGGAGUCUCGGCGGUCCCACCUCUCAGAAAGCUGUAGCAUAGGUAAGCAUGUUCCCUGAACCCUC
rno-novel-mir-1968	chr15:-:42860274:42860383	GUCUGACCCUUGACCUUUCCUCCACCAGCUCCGGAAUGACUACAUGCAACGCUAUGCCAGCAAGGUCAGUGAAGGCAUGGCUCUGCAGCUGGGCUGUCUGGAGCUCAGGU
rno-novel-mir-1969	chr15:-:4351056:4351165	UGACUGUUCGUUGACUGCUGCGGAAGAGGCGUGUCUGUAGGCGGGGGCUGCUGGCGGUCUUUAGCUUAAGUUCCUGUGGUGGUGCGGACAUUCUCGGUCCUGUCCACUGG
rno-novel-mir-1970	chr15:-:43542829:43542937	UUAUUUCCACCCCCUUCCCUCCUGUUCUCUCUCCCUCUCUUUCUUUUUUCCGCCCUAGCUGGAUCUGUGUUGGAGGAGAGAAAAAGAGACAGAGGAUUGCAUCUGUCUC
rno-novel-mir-1971	chr15:-:43647823:43647930	GCGUGCAGCCUCUCUAAGCAUGAGGAAGAGUGGAGCCAUGAAGAAAGGGGGCAUUUUCUCUGCAGAGUUCCUGAAGGUCUUCAUCCCAUCUCUCUUCCUCUCUCACGU
rno-novel-mir-1972	chr15:-:43854835:43854943	CGGCCAUCUCAAGGGUUUAAGAGCUUGGGAACAGUGGCUUCCACAGGACGCUCGAAGGUCCUGGUUGCAGCGUUUGUGAUUCUAAAGCUGGCACUGUUAGGAAAAUGGG
rno-novel-mir-1973	chr15:-:44444506:44444613	UGCUGCAGGAGUGAGUCAGGUGGCUCUGUGGUGCUGGCAGAUCACUGCAUCCAAAGUCCUUUAGGUCUCUAGCUCUAUGUGGUGACUACUGUAACUCACCAGAGCUCC
rno-novel-mir-1974	chr15:-:45421875:45421982	AGUCCGGACCACCAGCCUGCCUCCGCUUCCGGGCCCGCCCGCUCGGCUUCCUCUUUGAAAUCUGCGCGGGCCCCGGAGGCUGUGGAGGUUGAGGAGCUCCGCGGCUUU
rno-novel-mir-1975	chr15:-:45927955:45928062	AAAAGCGCUUCAGUAGCGAGAGGGGCUGAGAAAGUGGUGACACCGCUGGGGUGCGGAGGGAGUCUCUCAAACUUCUCUCAACAGCCCCAGGGCCAAUCUCCCCUCAGC
rno-novel-mir-1976	chr15:-:46276906:46277017	UGAACAACAGAGUCCCUUGCCCAGACUGCUGGACAGUUAGGGGCUGCCUGUGUGACUGUGAUGCUUCAAGCAGCCUCUUGACUGUCCAGCCAUCUCACGAUCCUUGAACUCC
rno-novel-mir-1977	chr15:-:47596864:47596971	AAAUGGAGUUUAGUUCUCAUAUGAAGGGAUGCAGAAGUCUUCAUCCCAGGAAUCUCCAGGGAGGAUAACUAUGCUUUUAUAACUGGGGACGGAGACUGGGGAUGAGAC
rno-novel-mir-1978	chr15:-:48172754:48172866	GGGUGUCGAUAUGUGCAAACAGCUCGGCUAUCUGAAGAGGGAGGAGCCAUUAUCACAGGCUCCCCUAGAGUUAGAAGCUGGCUCACAUGCCCUCUACCUCCAGUUUCAGAACA
rno-novel-mir-1979	chr15:-:51375924:51376034	AAGUCUCCAAAGUCCUUGCCGCAGGGACAUUUGGGGCUGUGGGCGGCCUCUGGGUUCAUAUUCUGACCCCCUCCCUGUCCACCGCCCCUACAGGCUCUGCCAUCUGUCACC
rno-novel-mir-1980	chr15:-:51400222:51400330	UGAGCCACAGCCGCCGCCAAGGGGUUGUGCGCUUGCGACUGCGGGACUUGCAGGAGGCCUUCCAGCGCAAAGGCAGUGUUCCGUUGGGGCUGGCUACCGUGCUGCAGGA
rno-novel-mir-1981	chr15:-:51752820:51752929	UUUUUUCCCCUCCUGGAGAGGGGCUAAGGGUGUCUCAGGUUUAUUGGCAGGCUCCAGAGAUUGCCAAGAGCUUAAUUACCUGAACCCUAAGCCCUGAAGUGGUAGGGAGC
rno-novel-mir-1982	chr15:-:51754145:51754252	GCGAGGGGAGGCUGGCGGACUGGGGUGGGAGCGGCGGGGUGUCUCGGUGGGUUCCUGCCUUUUGCCUGGACUUGCCGCGAGGUUCUCGGCCCUGGACCAAGCGGCAUG
rno-novel-mir-1983	chr15:-:51754195:51754302	GGAUACCCGCAAGCUUUGGGCGCUCCUCUGCAUUGCUUCCUGCUGCGCGUGCGAGGGGAGGCUGGCGGACUGGGGUGGGAGCGGCGGGGUGUCUCGGUGGGUUCCUGC
rno-novel-mir-1984	chr15:-:51754423:51754536	CCGGCCGCGCCCCUUCUCCUGCUCUAUUUGGCUGCAGAUUCCGGUCCCCGGAUUUGCAUAUUUUGGCAUCCAGUGGAAAAGGGAAGAACGGAACCCGCAGCCUUUAAAGGAACC
rno-novel-mir-1985	chr15:-:52243235:52243345	GGAUUGCCUACUGGGCUGCCCCAUCCUCAGUGUUCUUGGUGCUCCCAGGCCCUGCCUGGAGAGGAGCCCAUGGGAGUGGCUCCUGGGAGGGAACAUUGAGUAGGAGAGGAA
rno-novel-mir-1986	chr15:-:52264625:52264737	GCUAGCUCCUGCUUCUCUCCCAGCCUGACCUUUCCUCCUCUGAGCUUCUUUAACCUCCACUCAGGACAGGAAGGCAGGGCCAGCUGGGAGGAAUCCACAGAGCAGGCCAAGUC
rno-novel-mir-1987	chr15:-:52315214:52315324	UGAAGAAAGGCCAAUGGUAAACUUGACUUAAGGCUUUUGGUGAGCCACUGGCCUCAGCAGGCCCAAACCCUGCUGUCCUGUGUCUCACCCCACCCUACAAUACACACAUUC
rno-novel-mir-1988	chr15:-:52919459:52919572	GGGCUCUGCAUGGGCUGCCCUGACCAUGGGAGCUCUGGGUCUGGAGCUACCUUUACCCUGCCGGGAGGUCCUGUGGCCACUGCCUGCCUAUCUGCUGGUGUCCGCUGGCUGCUA
rno-novel-mir-1989	chr15:-:55272769:55272876	UUCCCACCAAAGGAUUCAGGCCAUAGCUGCUACCUGUUAAGAUAAGGGAUUUCACACUCCCGACUGUCUUAGAGGAAGGAACCCUGGGCUGUACUUGUGGUCAGCUCA
rno-novel-mir-1990	chr15:-:5718303:5718410	UGUGUCUGUGUGCGUGUGUUAUGUGUCUGCUGGUGUGUGUUUCAUAUGCGUGCUACACACACACGCGCACAUACGCACACACAAUGCACACACGCGCACAAUGUACAC
rno-novel-mir-1991	chr15:-:57767956:57768068	GGGUAAAUAUGUCCUCUUGGUGUUUUCUUCUUGGCUGACACAUUUCUUUAUUCACUGCCAUUCAAGCGAAUAAAUUUCUGUGCCAGCCAAGAUCAUAAAGAAGCUGGGUAAGU
rno-novel-mir-1992	chr15:-:57834056:57834163	CCCAGGCGGCUGCACUGGCUCGGAGGAGUAGCAGGAGGAGCUCCGCCGCAGGGUGAGUUCCCGGCCGCACUGCUGCCUCAUGGACCCAGCCAGAGAACCGCUGCGGCG
rno-novel-mir-1993	chr15:-:57888280:57888387	UUUUUAAAAAAAAAAGAAAAGCUGCUCUGGAUAAGGGUCUAGGGAGGAAGGGUAUGGGAAAGGCAUACUAGUCCUCUCUCGCAUUAUGUACCAUGUAGAAAACAUUCU
rno-novel-mir-1994	chr15:-:57891294:57891402	GCUGGGACCGGAAGGGACUUGAGAUGGACGGAAGACCUGAGGCUAGAGUCGCUACCCGGGUGUGGCCGGGGGAUGAUUGCAUCCGUCUCCCUCCCUCCGCGCCGCUCCA
rno-novel-mir-1995	chr15:-:58954135:58954242	GAAUCACACUGGAGCUCUGUGCUUUCCCCUCUGACCAGAGAAGUACAGAGAGGUACAUGGCAUAACUGAGGUCCCUGCUGCUCUAGACAUUCCCCAAGUGUCAGAGUA
rno-novel-mir-1996	chr15:-:61771961:61772068	CGAGGCUGCCGUAGGCCGCCCGCGGAAACGCCGCGUCGGGGGACGCCGAAGCCCGGAGGUCCAGGCUUUCGCCACCGGCGGACAUCAGUGAACGGGCUCGCAGGCUAC
rno-novel-mir-1997	chr15:-:70731706:70731817	CUGGUCAGGGCCGGCUCCAUUCACCCGGCCUAGUGGUCGGCUGAGACUCAAAAGACUGCAACUCGAGCCCCCUCUGAGUCCCAGCCGACAGAUGGGUGAGCUAGGCACCCUA
[truncated: 6,436 more rows]
