# Supplementary material for: Small RNA-Seq reveals novel miRNAs shaping the transcriptomic identity of rat brain structures
Source: Life Sci Alliance. 2018 Sep 30;1(5):e201800018. doi: 10.26508/lsa.201800018 (PMC6238413; doi:10.26508/lsa.201800018)
Supplement: Supplementary file 3 [file LSA-2018-00018_TableS3.xlsx]

## Sheet: Feuille1
Novel miRNA name	sequence
rno-novel-mir-1	UAACUGCCUUCUGCUGCCCUC
rno-novel-mir-10	AUUCUUCUCAGUGGGCUUAGA
rno-novel-mir-11	UUACCUACUCCCACUCUGCCC
rno-novel-mir-12-1	AUCUCGGUGGGACCUCCA
rno-novel-mir-12-2	AUCUCGGUGGGACCUCCA
rno-novel-mir-12-3	AUCUCGGUGGGACCUCCA
rno-novel-mir-13	AUUUUAUUUCUGAGGUUA
rno-novel-mir-14	UCUCUGGGCCUGUGUCUU
rno-novel-mir-15	UCUCGGUGGGACCUCCAUU
rno-novel-mir-16	UUCGGCUGCAUUUCUCGGUUGU
rno-novel-mir-17	GCAAGGCCCAGCGAGUGACU
rno-novel-mir-18	GCUGAAAGCCAUUUCCCGUGUUU
rno-novel-mir-19-2	AGGAGUUGGGGAUUUAGCUCA
rno-novel-mir-19-1	AGGAGUUGGGGAUUUAGCUCA
rno-novel-mir-2-4	AUCCCGGACGAGCCCCCA
rno-novel-mir-2-5	AUCCCGGACGAGCCCCCA
rno-novel-mir-2-6	AUCCCGGACGAGCCCCCA
rno-novel-mir-2-1	AUCCCGGACGAGCCCCCA
rno-novel-mir-2-2	AUCCCGGACGAGCCCCCA
rno-novel-mir-2-3	AUCCCGGACGAGCCCCCA
rno-novel-mir-20	UUACACAAGUCCAUUGCCCUGC
rno-novel-mir-21	CCGUCCUGUACUGCAGCA
rno-novel-mir-22-1	GGGGAUGUAGCUCAGUGG
rno-novel-mir-22-2	GGGGAUGUAGCUCAGUGG
rno-novel-mir-22-3	GGGGAUGUAGCUCAGUGG
rno-novel-mir-22-4	GGGGAUGUAGCUCAGUGG
rno-novel-mir-22-5	GGGGAUGUAGCUCAGUGG
rno-novel-mir-23	UUCAUGCACACACACAGCCCAGA
rno-novel-mir-24	UCAAGAGCAAUAACGAAAA
rno-novel-mir-25	GCGGGCGGGCGGGAGGCG
rno-novel-mir-26-2	CCACCCCUGGCUCUGCUGGAUC
rno-novel-mir-26-1	CCACCCCUGGCUCUGCUGGAUC
rno-novel-mir-27	UCAGAGAGAGUAGAGGACAAGCA
rno-novel-mir-3	AUAAGUGUAGAGAGUCUGUAGU
rno-novel-mir-28	ACUGCUCUUCCAGAGGUCCUGAGU
rno-novel-mir-29	GCCGGCUGGACUUGUGGG
rno-novel-mir-30	UCAGAAUUCUUGUCUUCACAGA
rno-novel-mir-31	UUUCCCCUCCCUCUCUGCGGU
rno-novel-mir-32	ACUCGGAUCAAGCUGAGAGCCA
rno-novel-mir-33	CACAGUCUAGUGGCCUUGGAAG
rno-novel-mir-34	CCCCCACCCUGCCCUGUGCCCUAU
rno-novel-mir-35	UUUCCUCUCUGCCCCAUAGGGU
rno-novel-mir-36	UUCCCGGCCAAUGCACCA
rno-novel-mir-37	GCAGGAACUUGUGAGUCU
rno-novel-mir-4	CUCUGGCACCGGUGUAUGGGACU
rno-novel-mir-38	ACUCUAGCUGCCAAAGGCGCU
rno-novel-mir-39	CGGCGGCGGCGGCGGCGGCGGC
rno-novel-mir-40	CACUUAACCUGUUGGGAACACU
rno-novel-mir-41	UCCGGGGCUGCGGGAUGA
rno-novel-mir-42	AUCAUCAUCAUCAUUAUCAUCA
rno-novel-mir-43	AGCGGCUCCAGCCUCCUGCU
rno-novel-mir-44	CUUAGUACCCUCUGCCCCCUACA
rno-novel-mir-45	CGCGGGCGGGGCCGGGGG
rno-novel-mir-46	UGCGUCGCCGGCGGCCGCGGUAG
rno-novel-mir-47	CCUGCCCGCAGACUCUGAGCU
rno-novel-mir-5	UGGGUUCGGUCCCCAGCUCCGA
rno-novel-mir-48	AUGGCGGCUGUGAGUCUG
rno-novel-mir-49	ACUCUCUCACUCUGCAUGGUUA
rno-novel-mir-50	AAAAAAGAACCAAAAAAAAAA
rno-novel-mir-51	UAGGAUUUGCUGAAGGAG
rno-novel-mir-52-1	UCAUAAGAUUCGGUGCAAUAAGU
rno-novel-mir-52-2	UCAUAAGAUUCGGUGCAAUAAGU
rno-novel-mir-53	GCUGUGAUGGCCGAGUGG
rno-novel-mir-54	UGUGUCUUUCUCCCUCUUGAC
rno-novel-mir-55	AACCCUGACUAAGACAUGCUCU
rno-novel-mir-56	ACUGGACUUGGAGUCAGAAG
rno-novel-mir-57	CUCUCACCUCCCGCUCUCCACA
rno-novel-mir-6	CCUCCUCUUCUCUCUCUCUAGU
rno-novel-mir-58	AUCUCGCUGGGGCCUCCA
rno-novel-mir-59	UCCCCUGGGUCUGUGCUCUGCA
rno-novel-mir-60	CAGGGAGAGAACUAGUACAG
rno-novel-mir-61	CCUCCUCUCCUCGUACCUGCAG
rno-novel-mir-62	UGUACUGUGUUCCCUGUCCC
rno-novel-mir-63	GCCUGAGAGCUGGGGGUA
rno-novel-mir-64	CUAAGGCAGGCAGACUUCAGUGU
rno-novel-mir-65	AUGUAAGUGUGUAUGUAUAUGU
rno-novel-mir-66-1	GUCCCUGUUCGGGCGCCA
rno-novel-mir-66-2	GUCCCUGUUCGGGCGCCA
rno-novel-mir-67	CAGAACCUGCUCCCGACAAUGA
rno-novel-mir-7	AGUCAGGCUACUGGUUAUAUUCCA
rno-novel-mir-68	UGGGCACUUAUUUCCUGACAGA
rno-novel-mir-69	CUGGGUUCGGUCCCCAGCUCCGA
rno-novel-mir-70	CCUCCAUGUUUUCUGUUCUGUU
rno-novel-mir-71	CUCCCUCUAGUCCUCUUGGUUGU
rno-novel-mir-72	CCAGUAUUGACUGUGCUGCUGAA
rno-novel-mir-73	UGGAGGAGAGAAAAAGAGA
rno-novel-mir-74	CACCCUGCUGCUGGCACUGACUC
rno-novel-mir-75	CAGUGGGAGAGCAUUUGA
rno-novel-mir-76	AAUGGUUAGCACUCUGGA
rno-novel-mir-77	AGUUUUCUGCCUUUCGCUCUGUGG
rno-novel-mir-8-1	GGUAUAACCAAAGCCCGACUGA
rno-novel-mir-8-2	GGUAUAACCAAAGCCCGACUGA
rno-novel-mir-8-3	GGUAUAACCAAAGCCCGACUGA
rno-novel-mir-78	UGCCCCUGCUGAGGCUGUGUCU
rno-novel-mir-79	UUAGGACUCUGGUCAUCUUUGG
rno-novel-mir-80	CCCAGGGAGCUGUAAGAGCCG
rno-novel-mir-81	UUAAUCUCAGGGUCGUGGGU
rno-novel-mir-82	UGCUCACUCUGCCACUCUGCAG
rno-novel-mir-83	UUCCCGGCCAACGCACCA
rno-novel-mir-84	CUGUGGGCUGCAGGAGGAC
rno-novel-mir-85	UGCCGUCCAUCCCUCUGCACGA
rno-novel-mir-86	ACAGACUGGUGCCUGGGUGUGG
rno-novel-mir-9	CUGGGCGGGAUGGGAGGUGG
rno-novel-mir-87	GUUCCUGCUGAACUGAGCCAGU
rno-novel-mir-88	UAUAUAUAUACACACACACAUA
rno-novel-mir-89	GGAGAGAACGCAGUCUGAGUGGU
rno-novel-mir-90	AGGUCCUCAGUAAGUAUUUGUU
