# Supplementary material for: Small RNA-Seq reveals novel miRNAs shaping the transcriptomic identity of rat brain structures
Source: Life Sci Alliance. 2018 Sep 30;1(5):e201800018. doi: 10.26508/lsa.201800018 (PMC6238413; doi:10.26508/lsa.201800018)
Supplement: Supplementary file 4 [file LSA-2018-00018_TableS4.xlsx]

## Sheet: Sheet1
novel miRNA name	sequence
rno-novel-miR-1-3p	UAACUGCCUUCUGCUGCCCUC
rno-novel-miR-10-3p	AUUCUUCUCAGUGGGCUUAGA
rno-novel-miR-11-3p	UUACCUACUCCCACUCUGCCC
rno-novel-miR-12-5p	AUCUCGGUGGGACCUCCA
rno-novel-miR-13-5p	AUUUUAUUUCUGAGGUUA
rno-novel-miR-14-3p	UCUCUGGGCCUGUGUCUU
rno-novel-miR-15-3p	UCUCGGUGGGACCUCCAUU
rno-novel-miR-16-3p	UUCGGCUGCAUUUCUCGGUUGU
rno-novel-miR-17-5p	GCAAGGCCCAGCGAGUGACU
rno-novel-miR-18-5p	GCUGAAAGCCAUUUCCCGUGUUU
rno-novel-miR-19-5p	AGGAGUUGGGGAUUUAGCUCA
rno-novel-miR-2-5p	AUCCCGGACGAGCCCCCA
rno-novel-miR-20-3p	UUACACAAGUCCAUUGCCCUGC
rno-novel-miR-21-5p	CCGUCCUGUACUGCAGCA
rno-novel-miR-22-5p	GGGGAUGUAGCUCAGUGG
rno-novel-miR-23-3p	UUCAUGCACACACACAGCCCAGA
rno-novel-miR-24-5p	UCAAGAGCAAUAACGAAAA
Rno-novel-miR-25-3p	GCGGGCGGGCGGGAGGCG
Rno-novel-miR-26-3p	CCACCCCUGGCUCUGCUGGAUC
Rno-novel-miR-27-5p	UCAGAGAGAGUAGAGGACAAGCA
rno-novel-miR-3-3p	AUAAGUGUAGAGAGUCUGUAGU
rno-novel-miR-28-3p	ACUGCUCUUCCAGAGGUCCUGAGU
Rno-novel-miR-29-5p	GCCGGCUGGACUUGUGGG
Rno-novel-miR-30-3p	UCAGAAUUCUUGUCUUCACAGA
Rno-novel-miR-31-3p	UUUCCCCUCCCUCUCUGCGGU
Rno-novel-miR-32-5p	ACUCGGAUCAAGCUGAGAGCCA
Rno-novel-miR-33-3p	CACAGUCUAGUGGCCUUGGAAG
Rno-novel-miR-34-5p	CCCCCACCCUGCCCUGUGCCCUAU
Rno-novel-miR-35-5p	UUUCCUCUCUGCCCCAUAGGGU
Rno-novel-miR-36-3p	UUCCCGGCCAAUGCACCA
Rno-novel-miR-37-3p	GCAGGAACUUGUGAGUCU
rno-novel-miR-4-5p	CUCUGGCACCGGUGUAUGGGACU
rno-novel-miR-38-5p	ACUCUAGCUGCCAAAGGCGCU
rno-novel-miR-39-5p	CGGCGGCGGCGGCGGCGGCGGC
rno-novel-miR-40-3p	CACUUAACCUGUUGGGAACACU
rno-novel-miR-41-5p	UCCGGGGCUGCGGGAUGA
rno-novel-miR-42-5p	AUCAUCAUCAUCAUUAUCAUCA
rno-novel-miR-43-3p	AGCGGCUCCAGCCUCCUGCU
rno-novel-miR-44-3p	CUUAGUACCCUCUGCCCCCUACA
rno-novel-miR-45-3p	CGCGGGCGGGGCCGGGGG
rno-novel-miR-46-3p	UGCGUCGCCGGCGGCCGCGGUAG
rno-novel-miR-47-5p	CCUGCCCGCAGACUCUGAGCU
rno-novel-miR-5-3p	UGGGUUCGGUCCCCAGCUCCGA
rno-novel-miR-48-5p	AUGGCGGCUGUGAGUCUG
rno-novel-miR-49-5p	ACUCUCUCACUCUGCAUGGUUA
rno-novel-miR-50-5p	AAAAAAGAACCAAAAAAAAAA
rno-novel-miR-51-3p	UAGGAUUUGCUGAAGGAG
rno-novel-miR-52-3p	UCAUAAGAUUCGGUGCAAUAAGU
rno-novel-miR-53-3p	GCUGUGAUGGCCGAGUGG
rno-novel-miR-54-3p	UGUGUCUUUCUCCCUCUUGAC
rno-novel-miR-55-3p	AACCCUGACUAAGACAUGCUCU
rno-novel-miR-56-5p	ACUGGACUUGGAGUCAGAAG
rno-novel-miR-57-3p	CUCUCACCUCCCGCUCUCCACA
rno-novel-miR-6-3p	CCUCCUCUUCUCUCUCUCUAGU
rno-novel-miR-58-5p	AUCUCGCUGGGGCCUCCA
rno-novel-miR-59-3p	UCCCCUGGGUCUGUGCUCUGCA
rno-novel-miR-60-5p	CAGGGAGAGAACUAGUACAG
rno-novel-miR-61-3p	CCUCCUCUCCUCGUACCUGCAG
rno-novel-miR-62-3p	UGUACUGUGUUCCCUGUCCC
rno-novel-miR-63-5p	GCCUGAGAGCUGGGGGUA
rno-novel-miR-64-5p	CUAAGGCAGGCAGACUUCAGUGU
rno-novel-miR-65-5p	AUGUAAGUGUGUAUGUAUAUGU
rno-novel-miR-66-5p	GUCCCUGUUCGGGCGCCA
rno-novel-miR-67-5p	CAGAACCUGCUCCCGACAAUGA
rno-novel-miR-7-5p	AGUCAGGCUACUGGUUAUAUUCCA
rno-novel-miR-68-3p	UGGGCACUUAUUUCCUGACAGA
rno-novel-miR-69-3p	CUGGGUUCGGUCCCCAGCUCCGA
rno-novel-miR-70-3p	CCUCCAUGUUUUCUGUUCUGUU
rno-novel-miR-71-5p	CUCCCUCUAGUCCUCUUGGUUGU
rno-novel-miR-72-3p	CCAGUAUUGACUGUGCUGCUGAA
rno-novel-miR-73-3p	UGGAGGAGAGAAAAAGAGA
rno-novel-miR-74-3p	CACCCUGCUGCUGGCACUGACUC
rno-novel-miR-75-3p	CAGUGGGAGAGCAUUUGA
rno-novel-miR-76-5p	AAUGGUUAGCACUCUGGA
rno-novel-miR-77-5p	AGUUUUCUGCCUUUCGCUCUGUGG
rno-novel-miR-8-3p	GGUAUAACCAAAGCCCGACUGA
rno-novel-miR-78-5p	UGCCCCUGCUGAGGCUGUGUCU
rno-novel-miR-79-3p	UUAGGACUCUGGUCAUCUUUGG
rno-novel-miR-80-3p	CCCAGGGAGCUGUAAGAGCCG
rno-novel-miR-81-5p	UUAAUCUCAGGGUCGUGGGU
rno-novel-miR-82-3p	UGCUCACUCUGCCACUCUGCAG
rno-novel-miR-83-3p	UUCCCGGCCAACGCACCA
rno-novel-miR-84-5p	CUGUGGGCUGCAGGAGGAC
rno-novel-miR-85-3p	UGCCGUCCAUCCCUCUGCACGA
rno-novel-miR-86-3p	ACAGACUGGUGCCUGGGUGUGG
rno-novel-miR-9-3p	CUGGGCGGGAUGGGAGGUGG
rno-novel-miR-87-5p	GUUCCUGCUGAACUGAGCCAGU
rno-novel-miR-88-3p	UAUAUAUAUACACACACACAUA
rno-novel-miR-89-3p	GGAGAGAACGCAGUCUGAGUGGU
rno-novel-miR-90-5p	AGGUCCUCAGUAAGUAUUUGUU
