# Supplementary material for: Small RNA-Seq reveals novel miRNAs shaping the transcriptomic identity of rat brain structures
Source: Life Sci Alliance. 2018 Sep 30;1(5):e201800018. doi: 10.26508/lsa.201800018 (PMC6238413; doi:10.26508/lsa.201800018)
Supplement: Supplementary file 5 [file LSA-2018-00018_TableS5.xlsx]

## Sheet: Sheet1
		Number of miRNAs
		In CNS samples		Total
Chromosome	Size (Mb)	Referenced & expressed	Novel	miRBase	Novel & miRBase
chr1	282.76	37	12	64	76
chr2	266.44	15	7	20	27
chr3	177.7	15	6	21	27
chr4	184.23	16	5	21	26
chr5	173.71	15	6	23	29
chr6	147.99	61	4	73	77
chr7	145.73	12	8	17	25
chr8	133.31	15	6	20	26
chr9	122.1	8	3	8	11
chr10	112.63	28	15	37	52
chr11	90.46	12	4	16	20
chr12	52.72	5	4	6	10
chr13	114.03	17	0	19	19
chr14	115.49	5	4	8	12
chr15	111.25	10	3	16	19
chr16	90.67	2	3	3	6
chr17	90.84	18	3	24	27
chr18	88.2	9	7	13	20
chr19	62.28	11	3	13	16
chr20	56.21	2	3	5	8
chrX	159.97	45	1	59	60
chrY	3.31	0	0	0	0
