# Supplementary material for: Small RNA-Seq reveals novel miRNAs shaping the transcriptomic identity of rat brain structures
Source: Life Sci Alliance. 2018 Sep 30;1(5):e201800018. doi: 10.26508/lsa.201800018 (PMC6238413; doi:10.26508/lsa.201800018)
Supplement: Supplementary file 6 [file LSA-2018-00018_TableS6.xlsx]

## Sheet: pre-miRNAs_coordinates
miRNA name	chromosome	strand	start	end	distance with previous miRNA gene (bp)
rno-mir-3556b-1	chr1	-	39612908	39613014
rno-mir-3596c	chr1	-	60624030	60624146	21011016
rno-mir-3572	chr1	-	63128246	63128353	2504100
rno-mir-935	chr1	-	63322153	63322243	193800
rno-mir-295-1	chr1	-	63522985	63523065	200742
rno-mir-294	chr1	-	63523108	63523178	43
rno-mir-293	chr1	-	63523469	63523540	291
rno-mir-291b	chr1	-	63524193	63524300	653
rno-mir-292	chr1	-	63524481	63524562	181
rno-mir-291a	chr1	-	63524769	63524850	207
rno-mir-290	chr1	-	63525067	63525147	217
rno-mir-295-2	chr1	-	66933909	66933989	3408762
rno-mir-3099	chr1	-	71529856	71529984	4595867
rno-novel-miR-7-5p	chr1	-	121181069	121181182	49651085
rno-novel-miR-8-3p	chr1	-	121187461	121187572	6279
rno-mir-344b-2	chr1	-	122315615	122315685	1128043
rno-mir-344b-1	chr1	-	122322862	122322959	7177
rno-mir-344b-3	chr1	-	122330976	122331046	8017
rno-mir-344a-1	chr1	-	123441045	123441151	1109999
rno-mir-344a-2	chr1	-	123505479	123505585	64328
rno-mir-344g	chr1	-	123541492	123541570	35907
rno-mir-344i	chr1	-	123634944	123635042	93374
rno-mir-9b-3	chr1	-	142191168	142191282	18556126
rno-mir-224	chr1	-	147949930	147950011	5758648
rno-mir-105	chr1	-	148316256	148316328	366245
rno-mir-3102	chr1	-	172118681	172118817	23802353
rno-novel-miR-9-3p	chr1	-	199223784	199223893	27104967
rno-mir-202	chr1	-	219214575	219214646	19990682
rno-mir-210	chr1	-	221125894	221126003	1911248
rno-mir-675	chr1	-	222640800	222640883	1514797
rno-mir-483	chr1	-	222726907	222726979	86024
rno-mir-6315	chr1	-	228369429	228369529	5642450
rno-mir-107	chr1	-	260347511	260347597	31977982
rno-mir-6317-1	chr1	-	266528761	266528887	6181164
rno-mir-6317-2	chr1	-	267108665	267108791	579778
rno-mir-3085	chr1	-	268976707	268976795	1867916
rno-mir-3584-1	chr1	-	275104681	275104761	6127886
rno-mir-3584-2	chr1	-	278703804	278703884	3599043
rno-mir-29b-2	chr1	+	39612388	39612468	-239091496
rno-mir-29c-1	chr1	+	39612916	39613003	448
rno-mir-99b	chr1	+	60623874	60623943	21010871
rno-let-7e	chr1	+	60624039	60624131	96
rno-mir-125a	chr1	+	60624485	60624569	354
rno-novel-miR-5-3p	chr1	+	61495069	61495176	870500
rno-novel-miR-6-3p	chr1	+	78747669	78747780	17252493
rno-mir-330	chr1	+	81358760	81358856	2610980
rno-mir-343	chr1	+	81564995	81565087	206139
rno-mir-3569	chr1	+	90197442	90197517	8632355
rno-novel-miR-1-3p	chr1	+	100465736	100465846	10268219
rno-mir-150	chr1	+	102181484	102181568	1715638
rno-mir-211	chr1	+	126151169	126151274	23969601
rno-novel-miR-3-3p	chr1	+	137041208	137041319	10889934
rno-mir-7a-2	chr1	+	141551342	141551436	4510023
rno-mir-9a-3	chr1	+	142191179	142191268	639743
rno-mir-1839	chr1	+	144303949	144304012	2112681
rno-mir-509	chr1	+	151036408	151036492	6732396
rno-mir-547	chr1	+	151058309	151058389	21817
rno-mir-201	chr1	+	151058608	151058687	219
rno-mir-3585	chr1	+	151063644	151063761	4957
rno-mir-5132	chr1	+	152464631	152464701	1400870
rno-mir-708	chr1	+	167436243	167436330	14971542
rno-mir-326	chr1	+	170722071	170722165	3285741
rno-mir-139	chr1	+	172779847	172779914	2057682
rno-novel-miR-4-5p	chr1	+	198994806	198994918	26214892
rno-mir-762	chr1	+	206182456	206182530	7187538
rno-mir-3574	chr1	+	221125888	221126005	14943358
rno-mir-194-2	chr1	+	228619887	228619971	7493882
rno-mir-192	chr1	+	228620072	228620181	101
rno-mir-204	chr1	+	247690190	247690299	19070009
rno-mir-101b	chr1	+	254503393	254503489	6813094
rno-mir-146b	chr1	+	273520429	273520516	19016940
rno-mir-6316	chr1	+	285672516	285672616	12152000
rno-mir-484	chr10	-	27845	27921	-285644771
rno-novel-miR-60-5p	chr10	-	7120960	7121069	7093039
rno-mir-3568	chr10	-	9621964	9622064	2500895
rno-mir-3547	chr10	-	14420724	14420833	4798660
rno-mir-146a	chr10	-	28806739	28806833	14385906
rno-novel-miR-58-5p	chr10	-	40051188	40051296	11244355
rno-mir-365	chr10	-	64570072	64570157	24518776
rno-mir-193a	chr10	-	64583972	64584057	13815
rno-novel-miR-59-3p	chr10	-	65025320	65025431	441263
rno-mir-6327	chr10	-	68640719	68640851	3615288
rno-mir-142	chr10	-	75051463	75051549	6410612
rno-mir-301a	chr10	-	75682818	75682917	631269
rno-novel-miR-61-3p	chr10	-	90992772	90992883	15309855
rno-novel-miR-62-3p	chr10	-	90998113	90998222	5230
rno-mir-3064	chr10	-	94727751	94727817	3729529
rno-mir-297	chr10	-	101370357	101370422	6642540
rno-mir-3577	chr10	-	103945203	103945315	2574781
rno-mir-338	chr10	-	108793410	108793475	4848095
rno-mir-3594	chr10	-	108842796	108842860	49321
rno-mir-3562	chr10	-	108844903	108845014	2043
rno-novel-miR-48-5p	chr10	+	10725810	10725917	-98119204
rno-novel-miR-49-5p	chr10	+	14088974	14089083	3363057
rno-novel-miR-50-5p	chr10	+	14649627	14649741	560544
rno-novel-miR-51-3p	chr10	+	17312503	17312610	2662762
rno-mir-218a-2	chr10	+	20303158	20303267	2990548
rno-mir-103-1	chr10	+	20480351	20480436	177084
rno-novel-miR-52-3p	chr10	+	28889711	28889823	8409275
rno-mir-336	chr10	+	35121530	35121625	6231707
rno-mir-340-1	chr10	+	35327186	35327283	205561
rno-mir-340-2	chr10	+	35339303	35339400	12020
rno-novel-miR-53-3p	chr10	+	55697468	55697575	20358068
rno-mir-324	chr10	+	56366245	56366327	668670
rno-mir-497	chr10	+	56589141	56589209	222814
rno-mir-195	chr10	+	56589465	56589551	256
rno-novel-miR-54-3p	chr10	+	56652238	56652348	62687
rno-mir-212	chr10	+	61729092	61729202	5076744
rno-mir-132	chr10	+	61729385	61729485	183
rno-mir-6326	chr10	+	62013389	62013499	283904
rno-mir-22	chr10	+	62013642	62013736	143
rno-mir-423	chr10	+	62796752	62796830	783016
rno-novel-miR-55-3p	chr10	+	64133475	64133586	1336645
rno-mir-3549	chr10	+	64583957	64584068	450371
rno-mir-144	chr10	+	66340681	66340763	1756613
rno-mir-451	chr10	+	66340853	66340924	90
rno-mir-632	chr10	+	67418637	67418714	1077713
rno-novel-miR-56-5p	chr10	+	75687121	75687230	8268407
rno-mir-21	chr10	+	76197081	76197172	509851
rno-mir-196c	chr10	+	83916623	83916702	7719451
rno-mir-10a	chr10	+	83968682	83968791	51980
rno-mir-152	chr10	+	84512232	84512316	543441
rno-novel-miR-57-3p	chr10	+	90740935	90741046	6228619
rno-mir-3065	chr10	+	108793393	108793495	18052347
rno-mir-3588	chr11	-	19752271	19752376	-89041224
rno-mir-6324	chr11	-	39913805	39913925	20161429
rno-mir-568	chr11	-	61129098	61129193	21215173
rno-mir-1224	chr11	-	87064950	87065034	25935757
rno-mir-99a	chr11	+	19707423	19707503	-67357611
rno-let-7c-1	chr11	+	19708143	19708236	640
rno-mir-125b-2	chr11	+	19752280	19752367	44044
rno-mir-155	chr11	+	27810358	27810422	8057991
rno-mir-802	chr11	+	37163115	37163210	9352693
rno-novel-miR-63-5p	chr11	+	39531858	39531965	2368648
rno-mir-6325	chr11	+	40257501	40257641	725536
rno-novel-miR-64-5p	chr11	+	58661247	58661357	18403606
rno-novel-miR-65-5p	chr11	+	73488023	73488134	14826666
rno-mir-28	chr11	+	81345175	81345260	7857041
rno-mir-6323	chr11	+	87889459	87889563	6544199
rno-mir-185	chr11	+	89906640	89906719	2017077
rno-mir-1306	chr11	+	89951571	89951643	44852
rno-mir-301b	chr11	+	91181973	91182050	1230330
rno-mir-130b	chr11	+	91182320	91182401	270
rno-mir-25	chr12	-	21364970	21365053	-69817431
rno-mir-93	chr12	-	21365173	21365259	120
rno-mir-106b	chr12	-	21365382	21365463	123
rno-novel-miR-67-5p	chr12	-	22238720	22238831	873257
rno-mir-702	chr12	-	24733630	24733736	2494799
rno-mir-6322	chr12	-	28811177	28811295	4077441
rno-novel-miR-68-3p	chr12	-	44147455	44147566	15336160
rno-mir-339	chr12	+	19355865	19355960	-24791701
rno-novel-miR-2-5p	chr12	+	19394982	19395094	39022
rno-novel-miR-66-5p	chr12	+	36774669	36774780	17379575
rno-mir-3570	chr13	-	59986056	59986172	23211276
rno-mir-3120	chr13	-	85024819	85024935	25038647
rno-mir-350-2	chr13	-	99302871	99302969	14277936
rno-mir-205	chr13	-	116787618	116787725	17484649
rno-mir-3556b-2	chr13	-	118329970	118330076	1542245
rno-mir-350-1	chr13	+	48922457	48922555	-69407619
rno-mir-3473	chr13	+	49803944	49804010	881389
rno-mir-128-1	chr13	+	50001706	50001787	197696
rno-mir-135b	chr13	+	54046530	54046626	4044743
rno-mir-181a-1	chr13	+	59986075	59986174	5939449
rno-mir-181b-1	chr13	+	59986236	59986345	62
rno-mir-488	chr13	+	81112954	81113032	21126609
rno-mir-1843b	chr13	+	81975828	81975889	862796
rno-mir-199a	chr13	+	85019397	85019506	3043508
rno-mir-214	chr13	+	85024815	85024924	5309
rno-mir-664-2	chr13	+	107866605	107866663	22841681
rno-mir-194-1	chr13	+	107924394	107924476	57731
rno-mir-29b-3	chr13	+	118329450	118329530	10404974
rno-mir-29c-2	chr13	+	118329978	118330065	448
rno-mir-6321	chr14	-	21007165	21007305	-97322900
rno-mir-193b	chr14	-	30144277	30144359	9136972
rno-mir-218a-1	chr14	-	66955494	66955603	36811135
rno-novel-miR-70-3p	chr14	+	44548357	44548468	-22407246
rno-mir-328b	chr14	+	45138424	45138541	589956
rno-mir-218b	chr14	+	66955494	66955607	21816953
rno-novel-miR-71-5p	chr14	+	83346712	83346823	16391105
rno-novel-miR-69-3p	chr14	+	106951328	106951436	23604505
rno-mir-216b	chr14	+	112790786	112790887	5839350
rno-mir-216a	chr14	+	112802262	112802367	11375
rno-mir-217	chr14	+	112809662	112809766	7295
rno-mir-208a	chr15	-	37500050	37500132	-75309716
rno-mir-208b	chr15	-	37526109	37526220	25977
rno-novel-miR-72-3p	chr15	-	41961024	41961136	4434804
rno-novel-miR-73-3p	chr15	-	43542829	43542937	1581693
rno-mir-3546	chr15	+	37500034	37500149	-6042903
rno-mir-6320	chr15	+	48634509	48634629	11134360
rno-mir-598-1	chr15	+	50653535	50653613	2018906
rno-mir-598-2	chr15	+	50816188	50816266	162575
rno-mir-124-1	chr15	+	51712751	51712835	896485
rno-mir-320	chr15	+	55857793	55857874	4144958
rno-mir-759	chr15	+	65686082	65686178	9828208
rno-mir-1297	chr15	+	67500745	67500818	1814567
rno-mir-17-1	chr15	+	103640902	103640985	36140084
rno-mir-18a	chr15	+	103641038	103641133	53
rno-mir-19a	chr15	+	103641185	103641266	52
rno-mir-20a	chr15	+	103641357	103641441	91
rno-mir-19b-1	chr15	+	103641487	103641573	46
rno-mir-92a-1	chr15	+	103641609	103641686	36
rno-mir-3075	chr16	+	1800322	1800434	-101841364
rno-mir-346	chr16	+	9574933	9575030	7774499
rno-novel-miR-74-3p	chr16	+	20838948	20839060	11263918
rno-novel-miR-75-3p	chr16	+	33922778	33922885	13083718
rno-novel-miR-76-5p	chr16	+	52686887	52686996	18764002
rno-mir-383	chr16	+	57201649	57201722	4514653
rno-mir-3074	chr17	-	816753	816869	-56384969
rno-novel-miR-79-3p	chr17	-	10456135	10456246	9639266
rno-mir-3596d	chr17	-	18474330	18474426	8018084
rno-mir-3596b	chr17	-	18476094	18476188	1668
rno-mir-6319-2	chr17	-	38655208	38655334	20179020
rno-mir-466d	chr17	-	73485195	73485287	34829861
rno-mir-466b-2	chr17	-	73500719	73500800	15432
rno-mir-466b-1	chr17	-	73503749	73503834	2949
rno-mir-466c	chr17	-	73745319	73745397	241485
rno-mir-466b-4	chr17	-	73751778	73751859	6381
rno-mir-466b-3	chr17	-	73754808	73754893	2949
rno-mir-23b	chr17	+	816035	816131	-72938858
rno-mir-27b	chr17	+	816274	816370	143
rno-mir-24-1	chr17	+	816781	816848	411
rno-mir-7a-1	chr17	+	8879389	8879485	8062541
rno-mir-874	chr17	+	9222188	9222263	342703
rno-mir-3542-1	chr17	+	11527603	11527719	2305340
rno-mir-3542-2	chr17	+	11745204	11745320	217485
rno-novel-miR-77-5p	chr17	+	13482393	13482506	1737073
rno-novel-miR-78-5p	chr17	+	16004693	16004804	2522187
rno-let-7a-1	chr17	+	18473966	18474059	2469162
rno-let-7f-1	chr17	+	18474334	18474422	275
rno-let-7d	chr17	+	18476093	18476190	1671
rno-mir-3566	chr17	+	23337735	23337843	4861545
rno-mir-6319-1	chr17	+	36792132	36792258	13454289
rno-mir-1896	chr17	+	58263735	58263815	21471477
rno-mir-511	chr17	+	83129840	83129918	24866025
rno-novel-miR-84-5p	chr18	-	1856671	1856779	-81273247
rno-mir-133a	chr18	-	2085457	2085543	228678
rno-mir-1	chr18	-	2087912	2087998	2369
rno-mir-187	chr18	-	16149604	16149707	14061606
rno-mir-378a	chr18	-	55956662	55956726	39806955
rno-mir-145	chr18	-	56198820	56198907	242094
rno-mir-143	chr18	-	56200186	56200290	1279
rno-mir-3591	chr18	-	59956798	59956906	3756508
Rno-novel-miR-26-3p	chr18	-	73403024	73403135	13446118
rno-mir-133c	chr18	+	2085438	2085555	-71317697
rno-mir-3571	chr18	+	2087901	2088011	2346
rno-novel-miR-80-3p	chr18	+	27558735	27558845	25470724
rno-mir-1949	chr18	+	28066258	28066354	507413
rno-mir-664-1	chr18	+	46701241	46701299	18634887
rno-novel-miR-81-5p	chr18	+	55802592	55802700	9101293
rno-mir-3557	chr18	+	55956640	55956752	153940
rno-mir-122	chr18	+	59956811	59956895	4000059
rno-novel-miR-82-3p	chr18	+	73624381	73624491	13667486
rno-novel-miR-83-3p	chr18	+	84540349	84540459	10915858
rno-novel-miR-85-3p	chr19	-	10078156	10078267	-74462303
rno-mir-138-2	chr19	-	11127479	11127560	1049212
rno-novel-miR-86-3p	chr19	-	19434841	19434952	8307281
rno-novel-miR-87-5p	chr19	-	25318851	25318962	5883899
rno-mir-1199	chr19	-	36110272	36110391	10791310
rno-mir-181d	chr19	-	36267151	36267233	156760
rno-mir-181c	chr19	-	36267311	36267416	78
rno-mir-3550	chr19	-	37017051	37017164	749635
rno-mir-6318	chr19	-	48128347	48128455	11111183
rno-mir-328a	chr19	-	48128921	48129004	466
rno-mir-23a	chr19	+	36294770	36294844	-11834234
rno-mir-27a	chr19	+	36294924	36295010	80
rno-mir-24-2	chr19	+	36295051	36295158	41
rno-mir-140	chr19	+	50471253	50471351	14176095
rno-mir-3084a	chr19	+	54235954	54236020	3764603
rno-mir-3564	chr19	+	65346120	65346231	11110100
rno-mir-9b-2	chr2	-	11746809	11746926	-53599422
rno-mir-2985	chr2	-	198998682	198998791	187251756
rno-mir-9b-1	chr2	-	206985807	206985914	7987016
rno-mir-92b	chr2	-	207955680	207955762	969766
rno-mir-760	chr2	-	243908753	243908832	35952991
rno-novel-miR-16-3p	chr2	-	257557224	257557335	13648392
rno-mir-186	chr2	-	282781917	282782002	25224582
rno-mir-9a-2	chr2	+	11746822	11746908	-271035180
rno-mir-582	chr2	+	59928607	59928687	48181699
rno-mir-449c	chr2	+	63933619	63933717	4004932
rno-mir-449a	chr2	+	63935154	63935244	1437
rno-novel-miR-14-3p	chr2	+	69855369	69855476	5920125
rno-novel-miR-15-3p	chr2	+	77920670	77920777	8065194
rno-mir-124-2	chr2	+	122049028	122049136	44128251
rno-mir-551b	chr2	+	136556511	136556608	14507375
rno-novel-miR-10-3p	chr2	+	144934354	144934464	8377746
rno-mir-15b	chr2	+	184967041	184967138	40032577
rno-mir-16	chr2	+	184967190	184967284	52
rno-novel-miR-11-3p	chr2	+	187732458	187732568	2765174
rno-mir-9a-1	chr2	+	206985816	206985904	19253248
rno-mir-3541	chr2	+	207903329	207903432	917425
rno-mir-190b	chr2	+	208854175	208854252	950743
rno-novel-miR-12-5p	chr2	+	225533235	225533345	16678983
rno-mir-6314	chr2	+	231156807	231156945	5623462
rno-novel-miR-13-5p	chr2	+	235695279	235695386	4538334
rno-mir-137	chr2	+	239707763	239707864	4012377
rno-mir-1956	chr2	+	262354523	262354585	22646659
rno-mir-219a-1	chr20	-	5895489	5895598	-256459096
rno-mir-327	chr20	-	16296103	16296196	10400505
rno-mir-877	chr20	+	5416400	5416484	-10879796
rno-mir-6328	chr20	+	5491916	5492012	75432
rno-mir-678	chr20	+	15366762	15366844	9874750
rno-novel-miR-88-3p	chr20	+	18563896	18564008	3197052
rno-novel-miR-89-3p	chr20	+	45357300	45357412	26793292
rno-novel-miR-19-5p	chr20	+	50560125	50560237	5202713
rno-mir-126b	chr3	-	9402712	9402829	-41157525
rno-mir-7578	chr3	-	11361084	11361165	1958255
rno-novel-miR-21-5p	chr3	-	11823743	11823850	462578
rno-mir-219a-2	chr3	-	13750976	13751071	1927126
rno-mir-6216	chr3	-	51470032	51470109	37718961
rno-mir-130a	chr3	-	78661697	78661784	27191588
rno-novel-miR-22-5p	chr3	-	79872108	79872217	1210324
rno-mir-129-2	chr3	-	89837992	89838088	9965775
rno-mir-6334	chr3	-	157279703	157279801	67441615
rno-mir-296	chr3	-	178408788	178408865	21128987
rno-mir-298	chr3	-	178409241	178409322	376
rno-mir-1b	chr3	-	181345849	181345933	2936527
rno-mir-126a	chr3	+	9402736	9402808	-171943197
rno-mir-219b	chr3	+	13750973	13751072	4348165
rno-mir-181a-2	chr3	+	28374769	28374885	14623697
rno-mir-181b-2	chr3	+	28375872	28375959	987
rno-mir-10b	chr3	+	68113662	68113770	39737703
rno-mir-3590	chr3	+	78661704	78661777	10547934
rno-novel-miR-20-3p	chr3	+	93652291	93652402	14990514
rno-mir-674	chr3	+	115421240	115421316	21768838
rno-mir-147	chr3	+	121313451	121313529	5892135
rno-mir-103-2	chr3	+	130329252	130329337	9015723
rno-novel-miR-17-5p	chr3	+	131359157	131359266	1029820
rno-novel-miR-18-5p	chr3	+	154866988	154867100	23507722
rno-mir-499	chr3	+	157506669	157506733	2639569
rno-mir-124-3	chr3	+	180116126	180116212	22609393
rno-mir-671	chr4	-	7121264	7121344	-172994948
rno-mir-879	chr4	-	21605817	21605892	14484473
rno-mir-653	chr4	-	28563520	28563616	6957628
rno-mir-489	chr4	-	28564161	28564266	545
Rno-novel-miR-25-3p	chr4	-	49439898	49440005	20875632
rno-mir-592	chr4	-	54925353	54925448	5485348
rno-mir-182	chr4	-	57221574	57221635	2296126
rno-mir-96	chr4	-	57225167	57225272	3532
rno-mir-183	chr4	-	57225370	57225479	98
rno-mir-29a	chr4	-	58099674	58099761	874195
rno-mir-29b-1	chr4	-	58100053	58100133	292
rno-mir-148a	chr4	-	145680956	145681052	87580823
rno-mir-196b-1	chr4	-	146865887	146865971	1184835
rno-mir-196b-2	chr4	-	146951682	146951766	85711
rno-mir-141	chr4	-	224253942	224254035	77302176
rno-mir-200c	chr4	-	224254382	224254450	347
rno-mir-129-1	chr4	+	56049095	56049166	-168205355
rno-mir-3553	chr4	+	57225373	57225478	1176207
rno-novel-miR-24-5p	chr4	+	58056082	58056190	830604
rno-mir-3556a	chr4	+	58099662	58099779	43472
rno-mir-3587	chr4	+	58100026	58100088	247
rno-mir-490	chr4	+	63056490	63056573	4956402
rno-novel-miR-23-3p	chr4	+	100108493	100108605	37051920
rno-mir-3575	chr4	+	224254355	224254469	124145750
rno-mir-378b	chr5	-	10415446	10415529	-213839023
rno-mir-876	chr5	-	57019551	57019629	46604022
rno-mir-873	chr5	-	57038981	57039057	19352
rno-mir-32	chr5	-	78089043	78089112	21049986
rno-mir-31b	chr5	-	111183075	111183192	33093963
rno-mir-101a	chr5	-	124050126	124050200	12866934
rno-mir-30c-1	chr5	-	143494757	143494845	19444557
rno-mir-30e	chr5	-	143497752	143497843	2907
Rno-novel-miR-29-5p	chr5	-	152589612	152589719	9091769
rno-mir-6215	chr5	-	161800079	161800145	9210360
rno-mir-429	chr5	-	176962353	176962437	15162208
rno-mir-200a	chr5	-	176963388	176963476	951
rno-mir-200b	chr5	-	176964166	176964260	690
rno-novel-miR-28-3p	chr5	+	19545201	19545312	-157419059
rno-mir-207	chr5	+	61562680	61562757	42017368
rno-mir-455	chr5	+	83211456	83211533	21648699
rno-mir-3084c	chr5	+	90854260	90854328	7642727
rno-mir-31a	chr5	+	111183081	111183186	20328753
rno-mir-872	chr5	+	117604927	117605007	6421741
rno-mir-761	chr5	+	132492895	132492970	14887888
rno-mir-3583	chr5	+	154400859	154400948	21907889
Rno-novel-miR-27-5p	chr5	+	156290007	156290119	1889059
rno-mir-6333	chr5	+	157610356	157610466	1320237
rno-mir-34a	chr5	+	170733242	170733343	13122776
rno-mir-6332	chr5	+	171032506	171032626	299163
rno-mir-3548	chr5	+	176963375	176963494	5930749
Rno-novel-miR-32-5p	chr6	-	27432157	27432268	-149531337
rno-mir-3593	chr6	-	86193848	86193938	58761580
rno-mir-3084b-1	chr6	-	101090843	101090911	14896905
rno-mir-3084b-2	chr6	-	101099784	101099852	8873
rno-mir-1843a	chr6	-	111742576	111742665	10642724
rno-mir-3068	chr6	-	120749446	120749521	9006781
Rno-novel-miR-30-3p	chr6	-	128412544	128412655	7663023
Rno-novel-miR-31-3p	chr6	-	130016275	130016385	1603620
rno-mir-3544	chr6	-	142868109	142868196	12851724
rno-mir-3543-1	chr6	-	142877522	142877636	9326
rno-mir-3543-2	chr6	-	142878392	142878506	756
rno-mir-299b	chr6	-	143021466	143021583	142960
rno-mir-3579	chr6	-	143022644	143022756	1061
rno-mir-3595	chr6	-	143035944	143036063	13188
rno-mir-3576	chr6	-	143040169	143040283	4106
rno-mir-3592	chr6	-	143046518	143046633	6235
rno-mir-409b	chr6	-	143055775	143055854	9142
rno-mir-3578	chr6	-	143056029	143056145	175
rno-mir-1247	chr6	-	143765241	143765322	709096
rno-mir-203b	chr6	-	145714619	145714733	1949297
rno-mir-3558	chr6	+	20980704	20980817	-124734029
rno-mir-342	chr6	+	141731245	141731343	120750428
rno-mir-345	chr6	+	141919044	141919139	187701
rno-mir-770	chr6	+	142845049	142845124	925910
rno-mir-673	chr6	+	142853465	142853547	8341
rno-mir-493	chr6	+	142861686	142861769	8139
rno-mir-337	chr6	+	142868097	142868193	6328
rno-mir-540	chr6	+	142868379	142868462	186
rno-mir-665	chr6	+	142868634	142868727	172
rno-mir-431	chr6	+	142873602	142873715	4875
rno-mir-433	chr6	+	142874511	142874603	796
rno-mir-127	chr6	+	142875607	142875703	1004
rno-mir-434-1	chr6	+	142877555	142877635	1852
rno-mir-434-2	chr6	+	142878425	142878505	790
rno-mir-136	chr6	+	142878938	142879019	433
rno-mir-341	chr6	+	142895410	142895505	16391
rno-mir-1188	chr6	+	142895748	142895829	243
rno-mir-370	chr6	+	142902086	142902164	6257
rno-mir-379	chr6	+	143019871	143019955	117707
rno-mir-411	chr6	+	143021020	143021095	1065
rno-mir-299a	chr6	+	143021495	143021557	400
rno-mir-380	chr6	+	143022661	143022737	1104
rno-mir-323	chr6	+	143023370	143023455	633
rno-mir-758	chr6	+	143023669	143023746	214
rno-mir-329	chr6	+	143024339	143024435	593
rno-mir-494	chr6	+	143026541	143026623	2106
rno-mir-679	chr6	+	143026735	143026871	112
rno-mir-1193	chr6	+	143026869	143026988	-2
rno-mir-666	chr6	+	143028694	143028792	1706
rno-mir-543	chr6	+	143028831	143028910	39
rno-mir-495	chr6	+	143030626	143030705	1716
rno-mir-667	chr6	+	143031908	143031999	1203
rno-mir-376c	chr6	+	143034796	143034879	2797
rno-mir-376b	chr6	+	143035452	143035537	573
rno-mir-376a	chr6	+	143035962	143036043	425
rno-mir-300	chr6	+	143036509	143036587	466
rno-mir-381	chr6	+	143038972	143039032	2385
rno-mir-487b	chr6	+	143039481	143039562	449
rno-mir-539	chr6	+	143040189	143040264	627
rno-mir-6331	chr6	+	143040935	143041057	671
rno-mir-544	chr6	+	143041526	143041603	469
rno-mir-382	chr6	+	143046535	143046614	4932
rno-mir-134	chr6	+	143046904	143046976	290
rno-mir-668	chr6	+	143047498	143047565	522
rno-mir-485	chr6	+	143047656	143047734	91
rno-mir-154	chr6	+	143050943	143051026	3209
rno-mir-496	chr6	+	143051640	143051718	614
rno-mir-377	chr6	+	143053047	143053118	1329
rno-mir-541	chr6	+	143055012	143055101	1894
rno-mir-409a	chr6	+	143055776	143055852	675
rno-mir-412	chr6	+	143055928	143055997	76
rno-mir-369	chr6	+	143056050	143056128	53
rno-mir-410	chr6	+	143056354	143056429	226
rno-mir-3072	chr6	+	143061152	143061262	4723
rno-mir-203a	chr6	+	145714633	145714729	2653371
rno-mir-153	chr6	+	154028732	154028818	8314003
rno-mir-3561	chr7	-	26557088	26557196	-127471730
rno-mir-135a	chr7	-	32974076	32974175	6416880
rno-novel-miR-38-5p	chr7	-	32983136	32983246	8961
rno-mir-331	chr7	-	34938750	34938845	1955504
rno-mir-3084d	chr7	-	66861667	66861735	31922822
rno-mir-875	chr7	-	74588190	74588262	7726455
rno-mir-30d	chr7	-	109228641	109228722	34640379
rno-mir-151	chr7	-	114421107	114421203	5192385
rno-mir-1249	chr7	-	125575315	125575434	11154112
rno-mir-349	chr7	-	129832133	129832229	4256699
Rno-novel-miR-35-5p	chr7	+	43324698	43324807	-86507531
rno-let-7i	chr7	+	67000236	67000320	23675429
Rno-novel-miR-36-3p	chr7	+	75381340	75381451	8381020
Rno-novel-miR-37-3p	chr7	+	80950420	80950527	5568969
rno-mir-3586	chr7	+	114421107	114421226	33470580
Rno-novel-miR-33-3p	chr7	+	117512890	117513001	3091664
rno-mir-33	chr7	+	123415303	123415371	5902302
rno-let-7c-2	chr7	+	126300921	126301015	2885550
rno-let-7b	chr7	+	126301336	126301420	321
Rno-novel-miR-34-5p	chr7	+	126590518	126590631	289098
rno-mir-196a	chr7	+	142375592	142375701	15784961
rno-mir-615	chr7	+	142420376	142420467	44675
rno-mir-148b	chr7	+	142692726	142692822	272259
rno-mir-3596a	chr8	-	44228456	44228569	-98464366
rno-mir-34c	chr8	-	54088381	54088457	9859812
rno-mir-34b	chr8	-	54088899	54088982	442
rno-mir-6329	chr8	-	55210029	55210119	1121047
rno-mir-628	chr8	-	73409615	73409698	18199496
rno-mir-190a-1	chr8	-	77362803	77362887	3953105
rno-mir-184	chr8	-	96677912	96677988	19315025
rno-mir-6330	chr8	-	113104289	113104427	16426301
rno-mir-191b	chr8	-	116698851	116698970	3594424
rno-novel-miR-44-3p	chr8	-	118891114	118891226	2192144
rno-mir-128-2	chr8	-	119718185	119718268	826959
rno-novel-miR-39-5p	chr8	+	22577679	22577793	-97140589
rno-mir-100	chr8	+	44222150	44222229	21644357
rno-let-7a-2	chr8	+	44228466	44228561	6237
rno-mir-125b-1	chr8	+	44272846	44272932	44285
rno-novel-miR-40-3p	chr8	+	48825727	48825838	4552795
rno-novel-miR-41-5p	chr8	+	62723759	62723866	13897921
rno-novel-miR-42-5p	chr8	+	65643110	65643221	2919244
rno-novel-miR-43-3p	chr8	+	69859751	69859859	4216530
rno-mir-190a-2	chr8	+	80550805	80550889	10690946
rno-let-7g	chr8	+	114237839	114237926	33686950
rno-mir-191a	chr8	+	116698867	116698957	2460941
rno-mir-425	chr8	+	116699324	116699406	367
rno-mir-711	chr8	+	117063312	117063379	363906
rno-mir-26a	chr8	+	126931592	126931681	9868213
rno-mir-138-1	chr8	+	130886768	130886866	3955087
rno-mir-7b	chr9	-	9803905	9804014	-121082961
rno-novel-miR-46-3p	chr9	-	44126869	44126981	34322855
rno-mir-375	chr9	-	81930296	81930370	37803315
rno-novel-miR-47-5p	chr9	-	82161465	82161575	231095
rno-mir-206	chr9	+	25648214	25648297	-56513361
rno-mir-133b	chr9	+	25652099	25652182	3802
rno-mir-30a	chr9	+	28377823	28377893	2725641
rno-mir-30c-2	chr9	+	28397564	28397647	19671
rno-mir-26b	chr9	+	81439824	81439908	53042177
rno-novel-miR-45-3p	chr9	+	92290818	92290925	10850910
rno-mir-149	chr9	+	99682346	99682434	7391421
rno-mir-3560	chrX	-	16902987	16903098	-82779447
rno-mir-98	chrX	-	21867881	21867988	4964783
rno-let-7f-2	chrX	-	21868509	21868591	521
rno-mir-421	chrX	-	75245456	75245534	53376865
rno-mir-374	chrX	-	75245612	75245679	78
rno-mir-672	chrX	-	75784654	75784733	538975
rno-mir-3559	chrX	-	76261608	76261722	476875
rno-mir-384	chrX	-	77108501	77108583	846779
rno-mir-325	chrX	-	77141009	77141106	32426
rno-mir-361	chrX	-	84652350	84652419	7511244
rno-mir-363	chrX	-	140166945	140167031	55514526
rno-mir-92a-2	chrX	-	140167096	140167187	65
rno-mir-19b-2	chrX	-	140167226	140167321	39
rno-mir-20b	chrX	-	140167365	140167436	44
rno-mir-17-2	chrX	-	140167738	140167815	302
rno-mir-505	chrX	-	143545600	143545666	3377785
rno-mir-743a	chrX	-	151248068	151248143	7702402
rno-mir-743b	chrX	-	151248558	151248634	415
rno-mir-742	chrX	-	151255553	151255629	6919
rno-mir-883	chrX	-	151255943	151256019	314
rno-mir-471	chrX	-	151267006	151267083	10987
rno-mir-3551	chrX	-	151267726	151267807	643
rno-mir-741	chrX	-	151269258	151269353	1451
rno-mir-463	chrX	-	151270931	151271008	1578
rno-mir-880	chrX	-	151276890	151276967	5882
rno-mir-878	chrX	-	151278363	151278439	1396
rno-mir-881	chrX	-	151278812	151278888	373
rno-mir-871	chrX	-	151282689	151282765	3801
rno-mir-3580	chrX	-	151290426	151290506	7661
rno-mir-465	chrX	-	151292178	151292254	1672
rno-mir-222	chrX	+	4474734	4474836	-146817520
rno-mir-221	chrX	+	4475295	4475403	459
rno-mir-532	chrX	+	16894994	16895072	12419591
rno-mir-188	chrX	+	16895394	16895473	322
rno-mir-362	chrX	+	16902294	16902358	6821
rno-mir-501	chrX	+	16902998	16903081	640
rno-mir-500	chrX	+	16906456	16906535	3375
rno-mir-223	chrX	+	66205958	66206067	49299423
rno-mir-3573	chrX	+	69766059	69766130	3559992
rno-mir-676	chrX	+	71080128	71080216	1313998
rno-mir-652	chrX	+	112450451	112450531	41370235
rno-novel-miR-90-5p	chrX	+	118131804	118131915	5681273
rno-mir-3552	chrX	+	118262791	118262895	130876
rno-mir-764	chrX	+	118264668	118264775	1773
rno-mir-1912	chrX	+	118272234	118272321	7459
rno-mir-1298	chrX	+	118332413	118332551	60092
rno-mir-448	chrX	+	118420170	118420281	87619
rno-mir-3589	chrX	+	143545578	143545689	25125297
rno-mir-322-1	chrX	+	152773468	152773562	9227779
rno-mir-503-1	chrX	+	152773783	152773853	221
rno-mir-351-1	chrX	+	152774513	152774593	660
rno-mir-542-1	chrX	+	152777453	152777531	2860
rno-mir-450b-1	chrX	+	152778561	152778629	1030
rno-mir-450a	chrX	+	152778684	152778774	55
rno-mir-542-2	chrX	+	152784192	152784270	5418
rno-mir-322-2	chrX	+	153211185	153211279	426915
rno-mir-503-2	chrX	+	153211500	153211570	221
rno-mir-351-2	chrX	+	153212230	153212310	660
rno-mir-542-3	chrX	+	153215172	153215250	2862
rno-mir-450b-2	chrX	+	153216280	153216348	1030
