# Supplementary material for: Small RNA-Seq reveals novel miRNAs shaping the transcriptomic identity of rat brain structures
Source: Life Sci Alliance. 2018 Sep 30;1(5):e201800018. doi: 10.26508/lsa.201800018 (PMC6238413; doi:10.26508/lsa.201800018)
Supplement: Supplementary file 8 [file LSA-2018-00018_TableS8.xlsx]

## Sheet: olfactory bulb
	bulb vs cortex		bulb vs hippo		bulb vs striatum		bulb vs spinal cord
	log2FoldChange	padj	log2FoldChange	padj	log2FoldChange	padj	log2FoldChange	padj		log2FC moy
rno-miR-429	11.2729	4.62064e-26	12.3639	3.65289e-31	9.89413	1.77776e-20	13.621	1.69741e-37		11.788
rno-miR-200b-3p	11.1739	2.22715e-24	12.3196	2.16413e-29	10.0383	5.63192e-20	13.5765	1.39535e-35		11.7771
rno-miR-141-3p	8.7408	0.000443361	14.1799	6.90131e-08	9.18807	0.000174309	14.6199	3.24257e-08		11.6822
rno-miR-200a-3p	10.8449	2.55405e-29	12.1016	2.93379e-36	9.54602	4.42206e-23	13.6085	1.50023e-45		11.5253
rno-miR-96-5p	11.3119	5.63581e-37	13.2483	1.81293e-48	9.11375	5.96815e-25	8.55657	4.80099e-22		10.5576
rno-miR-200c-3p	10.225	1.57403e-71	11.2306	4.59807e-86	9.6648	4.78079e-64	10.9604	3.39764e-82		10.5202
rno-miR-183-5p	11.3083	2.75671e-34	12.337	1.197e-40	10.2087	3.59481e-28	7.64615	3.72834e-16		10.375
rno-miR-182	11.0889	5.45854e-37	11.8725	1.14773e-42	10.2597	4.27475e-32	7.1305	5.82784e-16		10.0879
rno-miR-301b-3p	7.43651	0.00156538	7.64741	0.00119988	6.97298	0.00176721	7.95112	0.000642616		7.502
rno-novel-miR-47-5p	7.24599	0.000900682	8.52148	9.545e-05	5.31392	0.016421	7.8883	0.000267979		7.24242
rno-miR-224-5p	6.18808	3.73307e-07	4.69854	0.00012228	5.25633	1.21032e-05	2.9591	0.0191795		4.77551
rno-miR-375-3p	5.95771	2.73054e-25	4.31744	1.26838e-13	3.34289	9.63828e-09	2.75833	3.18992e-06		4.09409
rno-miR-130b-5p	2.6738	1.6539e-07	3.78948	6.53189e-14	4.07735	2.75664e-16	3.1148	6.46961e-10		3.41386
rno-miR-135b-5p	3.14322	1.39008e-35	3.45666	7.30456e-43	2.66685	3.92225e-26	3.71298	1.66437e-49		3.24493
rno-miR-205	2.74584	0.00230972	2.13669	0.0222457	4.17665	1.45501e-06	3.19977	0.000318577		3.06474
rno-miR-211-5p	3.44897	5.15728e-17	2.52603	1.00605e-09	3.04908	8.05105e-14	2.4531	2.80073e-09		2.8693
rno-miR-490-5p	2.20633	1.77334e-07	2.84455	9.53687e-12	3.17078	1.49702e-14	2.26094	7.38715e-08		2.62065
rno-miR-203a-3p	2.22184	8.6554e-07	3.0265	1.13783e-11	2.97059	1.95952e-11	1.37216	0.00322127		2.39777
rno-miR-184	1.90481	0.000123759	1.53011	0.00246982	2.86955	2.38308e-09	2.05288	2.7239e-05		2.08933
rno-miR-204-5p	1.97595	1.06965e-17	1.6861	4.96903e-13	2.15306	5.02519e-21	0.868298	0.000334211		1.67085
rno-miR-3559-5p	1.67847	2.34276e-05	1.56952	8.53671e-05	1.36367	0.000605459	1.66252	2.55514e-05		1.56854
rno-miR-17-5p	1.52065	2.21709e-12	1.94953	1.05676e-19	1.52028	1.58452e-12	0.9141	3.70826e-05		1.47614
rno-miR-15a-5p	1.29578	7.99276e-05	1.53186	2.18689e-06	1.35811	2.56087e-05	1.63804	3.28283e-07		1.45595
rno-miR-106b-5p	1.60527	3.0622e-16	1.39515	2.16199e-12	1.29933	4.43959e-11	1.33023	1.64864e-11		1.4075
rno-miR-124-3p	0.627159	0.0182427	0.878911	0.000608667	1.06292	2.07061e-05	2.99063	6.39936e-36		1.38991
rno-miR-532-5p	1.36738	1.28156e-07	1.37194	1.05943e-07	1.67415	4.31908e-11	1.0518	5.8539e-05		1.36632
rno-miR-20a-5p	1.65714	2.49813e-09	1.48142	1.10024e-07	1.34604	1.36201e-06	0.903682	0.00172814		1.34707
rno-miR-486	1.29292	2.23038e-09	1.44685	1.67837e-11	1.91817	8.43911e-20	0.505547	0.0293515		1.29087
rno-novel-miR-56-5p	1.0828	0.000443361	1.66582	2.38884e-08	0.908408	0.00321884	1.31272	1.33031e-05		1.24244
rno-miR-195-5p	0.810626	9.7389e-07	0.6991	3.11683e-05	2.01258	9.57468e-37	1.26777	3.60838e-15		1.19752
rno-miR-9a-5p	0.601978	0.000837645	0.760352	1.74514e-05	1.26983	1.00975e-13	1.99002	2.05256e-32		1.15554
rno-miR-378a-3p	0.994431	2.35114e-05	1.38785	1.64531e-09	0.898942	0.000126996	1.21814	1.34714e-07		1.12484
rno-miR-340-5p	0.941736	0.000613358	1.16859	1.56927e-05	1.38654	1.62178e-07	0.937712	0.000617106		1.10865
rno-miR-16-5p	0.984126	2.78252e-07	1.31273	3.65261e-12	1.22041	7.9516e-11	0.90996	2.03539e-06		1.10681
rno-miR-872-5p	0.920187	0.00115866	1.06901	0.000134171	1.01704	0.000256024	0.99662	0.000377843		1.00072
rno-miR-26a-5p	0.685279	0.000173898	0.823232	4.78096e-06	0.78616	1.07701e-05	1.34457	1.08061e-14		0.90981
rno-miR-93-5p	1.11209	9.26687e-12	1.09385	1.96515e-11	0.958204	3.94628e-09	0.412622	0.0185365		0.89419
rno-miR-708-5p	0.915705	0.000387934	0.979737	0.000126891	1.08273	1.59591e-05	0.547986	0.0413464		0.88154
rno-miR-140-3p	0.765324	8.47502e-05	1.08799	9.3629e-09	1.02856	4.89667e-08	0.558267	0.00490726		0.860034
rno-miR-30b-5p	0.699395	0.0210251	0.923006	0.00178116	0.636013	0.0368464	1.1305	8.32385e-05		0.847229
rno-miR-191a-5p	0.584542	0.00152107	0.585801	0.00159302	0.743288	3.34053e-05	0.800986	7.89818e-06		0.678654
rno-miR-99b-5p	0.589756	0.00115581	0.492644	0.00798921	0.804342	4.60906e-06	0.616456	0.000617106		0.6258
rno-miR-30d-5p	0.339714	0.0128219	0.780519	1.00098e-09	0.354169	0.0085048	0.756733	3.09209e-09		0.557784
rno-miR-505-3p	0.507491	0.0327228	0.4837	0.046468	0.569322	0.0141766	0.49988	0.0340901		0.515098
rno-miR-134-5p	-0.534473	0.00377159	-0.56864	0.00211668	-0.57052	0.00174921	-1.02185	6.30204e-09		-0.673871
rno-miR-24-3p	-1.07548	5.42642e-14	-0.467324	0.00211668	-0.445527	0.00304939	-0.76487	1.34714e-07		-0.6883
rno-miR-23b-3p	-1.05492	1.48601e-17	-0.501125	0.000112502	-0.561225	1.01903e-05	-1.20343	1.22698e-22		-0.830176
rno-miR-434-3p	-1.26715	3.2567e-25	-0.868676	3.3732e-12	-0.879221	1.2269e-12	-0.458102	0.000392601		-0.868287
rno-miR-346	-0.645645	0.0199864	-0.781502	0.00411531	-0.670773	0.0140957	-1.4171	4.04007e-08		-0.878755
rno-miR-127-3p	-0.991911	0.000387934	-1.10238	6.77477e-05	-0.987491	0.000338888	-0.600017	0.0391782		-0.92045
rno-miR-300-3p	-0.951389	0.000525739	-0.841109	0.00252054	-1.52489	6.49368e-09	-0.614007	0.0309116		-0.982849
rno-miR-770-5p	-0.680415	0.00202944	-1.45548	3.86256e-12	-1.26102	1.68692e-09	-0.639603	0.00371679		-1.00913
rno-miR-329-5p	-1.1396	7.98974e-10	-1.15839	3.66864e-10	-1.0777	4.75524e-09	-0.733675	0.000110324		-1.02734
rno-miR-433-3p	-0.86476	4.38317e-05	-1.05555	4.07803e-07	-1.41978	3.42784e-12	-1.14691	3.0082e-08		-1.12175
rno-miR-380-5p	-0.998036	8.14118e-08	-1.18555	1.14334e-10	-1.26798	3.42784e-12	-1.09162	3.10433e-09		-1.1358
rno-miR-382-5p	-1.23835	1.98916e-09	-1.00762	1.42238e-06	-1.16337	1.40414e-08	-1.17715	1.18209e-08		-1.14662
rno-miR-1249	-1.00873	7.99781e-07	-0.923795	7.38687e-06	-0.836018	4.67656e-05	-1.82182	3.26689e-20		-1.14759
rno-miR-598-3p	-0.99085	4.5795e-09	-0.97394	8.55199e-09	-1.33817	5.87452e-16	-1.3109	2.80861e-15		-1.15346
rno-miR-540-3p	-0.79116	0.00677093	-1.34131	1.63442e-06	-1.86733	7.15965e-12	-0.729264	0.0132149		-1.18227
rno-miR-495	-1.0337	3.73145e-08	-1.05457	1.80928e-08	-1.87219	6.15501e-25	-0.784405	3.71256e-05		-1.18622
rno-miR-496-3p	-1.4911	1.20661e-11	-1.09007	1.14286e-06	-1.36306	5.00156e-10	-0.927347	3.79743e-05		-1.2179
rno-miR-543-3p	-1.50567	3.43625e-25	-1.08971	1.85197e-13	-1.91671	3.69623e-40	-0.397459	0.0122106		-1.22739
rno-miR-485-5p	-1.70157	2.79118e-09	-1.08666	0.00023284	-1.446	4.50491e-07	-0.95103	0.00138272		-1.29631
rno-miR-154-5p	-1.55626	7.49172e-07	-1.32686	3.15363e-05	-1.63905	1.33715e-07	-0.726896	0.0299527		-1.31227
rno-miR-338-5p	-0.827862	0.00223717	-0.736671	0.00764859	-0.684324	0.0126997	-3.10626	2.66938e-35		-1.33878
rno-miR-411-3p	-1.94384	1.27549e-32	-1.40197	3.20706e-17	-1.67577	1.39387e-24	-1.11373	2.55257e-11		-1.53383
rno-miR-337-5p	-1.84019	1.22472e-18	-1.4681	3.93949e-12	-2.43472	4.27475e-32	-0.499479	0.0293515		-1.56062
rno-miR-541-5p	-1.7813	1.16865e-35	-1.54785	3.2569e-27	-1.87348	1.74335e-39	-1.2415	7.32812e-18		-1.61103
rno-miR-299a-5p	-2.10353	6.34401e-08	-1.91048	1.04893e-06	-2.1946	1.08145e-08	-0.913388	0.0285304		-1.7805
rno-novel-miR-42-5p	-1.68407	2.75647e-13	-2.01216	1.43301e-18	-1.51282	4.78491e-11	-2.13849	5.24973e-21		-1.83689
rno-miR-412-5p	-1.79881	3.70996e-11	-1.73841	1.67157e-10	-2.95504	6.29095e-29	-0.905436	0.00143189		-1.84943
rno-miR-667-3p	-1.98506	1.2651e-19	-1.99307	1.10415e-19	-2.30973	2.09367e-26	-1.56034	1.64168e-12		-1.96205
rno-miR-665	-1.65401	6.6662e-07	-1.81687	3.64303e-08	-2.92585	5.41461e-20	-1.64032	7.26596e-07		-2.00926
rno-miR-218a-5p	-2.1459	4.62433e-75	-2.76699	2.84421e-125	-2.45901	8.40907e-99	-0.846708	1.87114e-12		-2.05465
rno-miR-219a-2-3p	-1.68526	8.62153e-09	-1.61775	3.51067e-08	-1.61201	3.08052e-08	-4.085	1.44057e-47		-2.25
rno-novel-miR-59-3p	-2.71912	0.00238979	-1.99534	0.0357881	-2.74242	0.00189117	-2.15309	0.0187458		-2.40249
rno-miR-1298	-1.81658	0.00242619	-3.58597	3.66864e-10	-3.43702	1.59755e-09	-1.80603	0.00253658		-2.6614
rno-miR-544-3p	-17.5988	6.36619e-09	-18.1587	1.79175e-09	-19.7755	3.42738e-11	-18.8683	3.18761e-10		-18.6003

## Sheet: cortex
	cortex vs bulb		cortex vs hippo		cortex vs striatum		cortex vs spinal cord
	log2FoldChange	padj	log2FoldChange	padj	log2FoldChange	padj	log2FoldChange	padj		log2FC moy
rno-miR-132-3p	1.13341	4.69296e-07	2.25772	1.18719e-24	0.93051	0.000126706	3.29444	5.97484e-53		1.90402
rno-miR-128-3p	0.574561	0.000305794	1.04694	4.12566e-11	1.13279	2.13517e-13	3.74942	6.20388e-145		1.62593
rno-miR-146b-5p	1.81709	1.00202e-34	0.614964	0.00037391	1.5051	7.68658e-24	0.991408	7.65396e-11		1.23214
rno-miR-434-3p	1.26715	3.2567e-25	0.398475	0.00890981	0.387931	0.00675475	0.809049	1.10289e-10		0.715651
rno-miR-149-5p	-0.578317	1.18669e-05	-0.468782	0.0017736	-1.36253	7.03932e-27	-0.913962	1.23344e-12		-0.830898
rno-miR-135a-5p	-1.15941	5.79694e-06	-1.3541	4.73443e-07	-0.774741	0.00678295	-1.37316	6.96077e-08		-1.16535
rno-miR-298-5p	-1.23547	8.92256e-05	-0.9287	0.0134311	-1.05385	0.00196147	-3.33467	2.16565e-29		-1.63817
rno-miR-7b	-0.84714	0.000508267	-2.57359	8.06737e-29	-3.26923	1.37917e-46	-0.616566	0.014548		-1.82663
rno-miR-187-3p	-2.74904	9.44699e-12	-2.66852	2.23594e-10	-4.47466	1.84987e-29	-1.38872	0.00122634		-2.82024
rno-miR-375-3p	-5.95771	2.73054e-25	-1.64027	0.0276134	-2.61482	4.33797e-05	-3.19938	7.94654e-08		-3.35304
rno-novel-miR-28-3p	-7.0764	0.000837645	-7.77304	0.000913006	-7.64964	0.000600052	-7.70128	0.000302419		-7.55009

## Sheet: hippocampus
	hippo vs bulb		hippo vs cortex		hippo vs striatum		hippo vs spinal cord
	log2FoldChange	padj	log2FoldChange	padj	log2FoldChange	padj	log2FoldChange	padj		log2FC moy
rno-miR-218a-5p	2.76699	2.84421e-125	0.621093	2.2046e-06	0.307975	0.0438305	1.92028	1.15796e-60		1.40408
rno-miR-3065-5p	-5.5143	2.09445e-06	-5.0173	0.000100492	-7.01189	5.22108e-09	-5.85223	5.16554e-07		-5.84893

## Sheet: striatum
	striatum vs bulb		striatum vs cortex		striatum vs hippo		striatum vs spinal cord
	log2FoldChange	padj	log2FoldChange	padj	log2FoldChange	padj	log2FoldChange	padj		log2FC moy
rno-miR-187-3p	1.72562	2.12929e-05	4.47466	1.84987e-29	1.80615	4.46336e-05	3.08595	5.24231e-15		2.7731
rno-novel-miR-26-3p	2.99236	9.49112e-05	2.70944	0.000999222	2.32949	0.0076301	2.56409	0.00077297		2.64884
rno-miR-139-5p	2.92213	2.09441e-41	1.44095	2.63804e-10	1.48103	2.28715e-10	3.98219	3.74598e-77		2.45657
rno-miR-7b	2.42209	2.37285e-26	3.26923	1.37917e-46	0.695646	0.0137825	2.65267	1.52455e-31		2.25991
rno-miR-412-5p	2.95504	6.29095e-29	1.15623	7.4716e-05	1.21664	4.30795e-05	2.04961	9.97842e-15		1.84438
rno-miR-341	2.13784	8.57941e-19	1.83659	1.6275e-13	1.35008	2.86863e-07	2.0246	6.56867e-17		1.83728
rno-miR-383-5p	1.87223	9.1416e-12	1.17483	9.87035e-05	2.25088	3.95287e-15	1.8985	4.76242e-12		1.79911
rno-miR-665	2.92585	5.41461e-20	1.27184	0.000312948	1.10898	0.0034368	1.28553	9.11242e-05		1.64805
rno-miR-193b-3p	2.20345	2.50337e-09	1.01969	0.0176686	1.84194	5.20094e-06	1.31417	0.000594099		1.59481
rno-miR-337-5p	2.43472	4.27475e-32	0.594521	0.0157195	0.966612	3.91373e-05	1.93524	8.27023e-21		1.48277
rno-miR-409a-5p	2.2347	1.87007e-38	0.522687	0.0104222	0.587505	0.00479759	2.03782	1.63105e-32		1.34568
rno-miR-138-5p	1.14605	3.07284e-08	0.822228	0.000312948	0.944692	3.95253e-05	1.96221	3.42146e-22		1.2188
rno-miR-369-3p	1.55808	7.05036e-18	0.817301	4.45065e-05	0.684108	0.00145993	1.61793	3.914e-19		1.16936
rno-miR-543-3p	1.91671	3.69623e-40	0.411043	0.0176686	0.827005	1.83676e-07	1.51925	8.06154e-26		1.1685
rno-miR-495	1.87219	6.15501e-25	0.838493	3.69163e-05	0.817625	7.04065e-05	1.08779	5.35563e-09		1.15402
rno-miR-323-3p	1.43759	4.01805e-20	0.742258	1.98026e-05	0.532214	0.00479759	1.8839	6.05876e-34		1.14899
rno-miR-760-3p	1.07158	0.00303588	1.70034	5.16151e-06	0.995998	0.0184244	0.813251	0.0296123		1.14529
rno-miR-539-5p	1.65512	4.42206e-23	0.868711	2.1921e-06	0.435866	0.0431496	1.33075	2.83685e-15		1.07261
rno-miR-487b-3p	1.47624	2.44447e-28	0.615061	3.94361e-05	0.346282	0.0447836	1.82445	4.77195e-43		1.06551
rno-miR-149-5p	0.784214	9.73076e-10	1.36253	7.03932e-27	0.893749	3.31255e-11	0.448569	0.00081226		0.872266
rno-miR-195-5p	-2.01258	9.57468e-37	-1.20195	3.37691e-13	-1.31348	4.9854e-15	-0.744804	8.8302e-06		-1.3182
rno-miR-34a-5p	-1.10655	0.000108925	-2.82537	1.05559e-24	-1.04876	0.00127532	-4.14115	3.51011e-53		-2.28046

## Sheet: spinal cord
	spinal cord vs bulb		spinal cord vs cortex		spinal cord vs hippo		spinal cord vs striatum
	log2FoldChange	padj	log2FoldChange	padj	log2FoldChange	padj	log2FoldChange	padj		log2FC moy
rno-miR-10b-5p	9.44549	8.1237e-08	9.05949	1.9509e-07	11.5187	6.10115e-09	12.7407	5.46592e-10		10.6911
rno-miR-196b-5p	9.48296	3.05324e-13	10.3114	1.92344e-14	10.2216	8.26769e-15	12.5982	1.88792e-15		10.6535
rno-miR-196a-5p	10.4401	1.76575e-12	9.58117	1.19709e-11	10.9286	1.82809e-13	7.57524	2.33007e-08		9.63128
rno-miR-10a-5p	7.31012	1.65831e-17	7.56294	1.98422e-18	9.67833	9.08327e-30	8.11761	2.00393e-21		8.16725
rno-miR-615	7.9111	0.0139866	7.22816	0.027905	8.40084	0.0106903	7.73367	0.016013		7.81844
rno-miR-1-3p	4.23368	8.82285e-19	3.64187	6.00195e-14	4.88252	1.33137e-24	5.23638	2.17701e-28		4.49861
rno-miR-1b	5.00366	4.50316e-65	2.54474	3.2912e-17	4.30007	3.0481e-48	5.64389	1.07646e-82		4.37309
rno-miR-133a-3p	4.69793	3.11781e-33	2.61882	5.687e-11	4.3182	2.06263e-28	5.3804	2.05217e-43		4.25384
rno-miR-34a-5p	3.03459	6.87302e-29	1.31577	5.22323e-06	3.09239	9.08327e-30	4.14115	3.51011e-53		2.89597
rno-miR-219a-2-3p	4.085	1.44057e-47	2.39975	9.39959e-17	2.46725	9.79815e-18	2.47299	5.62794e-18		2.85625
rno-miR-3547	1.83058	0.00054848	3.71354	8.61102e-13	2.93564	1.7856e-08	2.41956	3.49198e-06		2.72483
rno-miR-451-5p	2.7091	0.00210034	2.51648	0.00535265	2.24075	0.0148524	2.80295	0.00133301		2.56732
rno-miR-338-5p	3.10626	2.66938e-35	2.2784	4.64654e-19	2.36959	9.96443e-21	2.42194	8.5428e-22		2.54405
rno-miR-298-5p	2.09919	1.76575e-12	3.33467	2.16565e-29	2.40597	4.78431e-16	2.28082	1.03789e-14		2.53016
rno-miR-15b-5p	1.16681	3.87471e-07	1.85548	2.19811e-16	1.60307	1.6774e-12	1.69017	5.65503e-14		1.57888
rno-miR-100-5p	0.887376	1.88897e-07	1.75942	2.18301e-26	1.51347	9.46836e-20	2.04512	9.86176e-36		1.55134
rno-miR-339-5p	0.93893	0.0029499	1.48024	1.80281e-06	1.34668	1.62746e-05	2.06423	5.20926e-12		1.45752
rno-miR-27b-3p	1.7042	7.61807e-15	0.885252	0.000143402	1.25419	2.75466e-08	1.2906	6.90112e-09		1.28356
rno-miR-330-5p	1.49916	7.75892e-16	1.32445	2.0835e-12	1.05863	3.28498e-08	1.00343	1.34774e-07		1.22142
rno-miR-1249	1.82182	3.26689e-20	0.813091	0.000115732	0.89802	1.62746e-05	0.985797	1.48698e-06		1.12968
rno-miR-190b-5p	1.38747	8.63247e-07	1.12705	0.000115732	0.796349	0.00876588	1.17665	4.03382e-05		1.12188
rno-miR-450a-5p	0.653107	0.0494133	1.19076	0.000206579	1.6105	2.42916e-07	1.01257	0.00141813		1.11673
rno-miR-322-3p	1.04717	0.000656845	0.875673	0.00607038	1.16223	0.000186144	1.34481	9.37143e-06		1.10747
rno-miR-423-3p	0.858423	0.00153094	0.998146	0.00026682	1.15787	1.68482e-05	1.26116	1.96589e-06		1.0689
rno-miR-351-5p	1.03721	7.29052e-05	0.909594	0.000747501	1.13648	1.67577e-05	1.14847	1.08565e-05		1.05794
rno-miR-21-5p	0.72837	0.0156204	0.933733	0.0017882	1.14009	0.000108248	1.30024	6.57983e-06		1.02561
rno-miR-181b-5p	0.763389	3.31332e-05	0.978432	8.96169e-08	1.04487	1.08698e-08	1.06715	3.36014e-09		0.963459
rno-miR-346	1.4171	4.04007e-08	0.771453	0.00512255	0.635596	0.0254644	0.746325	0.00565247		0.892618
rno-miR-503-5p	0.79816	0.00866966	0.73034	0.0182532	0.658265	0.0402672	1.06354	0.000328238		0.812577
rno-miR-702-3p	0.683248	0.00747126	0.82614	0.0012621	0.70158	0.00743854	0.668036	0.00874388		0.719751
rno-miR-421-3p	0.636072	0.000297947	0.979712	1.41729e-08	0.468495	0.0112151	0.451281	0.0117628		0.63389
rno-miR-134-5p	1.02185	6.30204e-09	0.487381	0.0101854	0.453214	0.0188242	0.451334	0.0156306		0.603446
rno-miR-107-3p	-0.910739	1.88077e-05	-0.562598	0.0123581	-0.581496	0.0107066	-0.5087	0.0233368		-0.640883
rno-miR-1843a-5p	-0.536359	0.00514122	-1.07156	5.76036e-09	-0.672462	0.000441146	-0.800558	1.7596e-05		-0.770235
rno-miR-26a-5p	-1.34457	1.08061e-14	-0.659288	0.000384044	-0.521336	0.00641685	-0.558407	0.00238157		-0.7709
rno-miR-29a-3p	-0.673975	0.00654612	-1.01451	3.55027e-05	-0.932948	0.000151071	-0.676737	0.00624101		-0.824542
rno-miR-29c-3p	-0.920294	0.0241805	-1.09831	0.00718219	-1.49452	0.000164914	-1.0489	0.00874388		-1.14051
rno-miR-323-3p	-0.446307	0.00845412	-1.14164	8.61102e-13	-1.35168	1.06246e-17	-1.8839	6.05876e-34		-1.20588
rno-miR-487b-3p	-0.348213	0.0180278	-1.20939	4.74513e-19	-1.47817	2.16387e-28	-1.82445	4.77195e-43		-1.21506
rno-miR-138-5p	-0.816163	0.000125552	-1.13999	6.35899e-08	-1.01752	1.65016e-06	-1.96221	3.42146e-22		-1.23397
rno-miR-29b-3p	-1.16915	0.00125542	-1.11014	0.00273745	-1.45551	5.74261e-05	-1.37161	0.000127516		-1.2766
rno-miR-129-5p	-1.24323	1.96283e-07	-1.49046	4.1962e-10	-1.0533	1.75451e-05	-1.43789	1.36691e-09		-1.30622
rno-miR-101a-3p	-1.86832	6.67839e-09	-1.21265	0.000339724	-1.24152	0.000222438	-0.967899	0.00402236		-1.3226
rno-miR-9a-5p	-1.99002	2.05256e-32	-1.38804	5.47372e-16	-1.22967	9.07871e-13	-0.72019	5.05384e-05		-1.33198
rno-miR-668	-0.96003	0.00011957	-1.34192	5.54846e-08	-1.41642	8.52492e-09	-1.64813	6.66991e-12		-1.34162
rno-miR-3085	-1.12699	0.0161877	-1.45772	0.00170581	-1.87098	3.65545e-05	-1.38158	0.00241137		-1.45932
rno-miR-3102	-1.72812	9.36096e-11	-0.909151	0.00142623	-1.24171	6.95293e-06	-2.08469	2.50244e-15		-1.49092
rno-miR-381-3p	-0.956503	0.000617106	-1.50843	3.58375e-08	-1.83217	8.46446e-12	-2.07713	3.95016e-15		-1.59356
rno-miR-137-3p	-0.879579	0.000768638	-1.40905	3.9945e-08	-2.36865	1.1105e-21	-2.20524	4.57998e-19		-1.71563
rno-miR-344b-1-3p	-2.47297	3.62295e-20	-1.0516	0.00028056	-1.40644	5.54708e-07	-1.93237	1.08893e-12		-1.71585
rno-miR-212-5p	-1.03475	1.28582e-05	-2.76682	3.03765e-34	-0.999404	3.42199e-05	-2.51157	1.16887e-28		-1.82814
rno-miR-344a-3p	-2.36415	1.88322e-18	-1.17354	4.4083e-05	-2.21147	3.6643e-16	-2.15791	1.65736e-15		-1.97677
rno-mir-504	-1.64497	0.00136609	-1.88847	0.00026682	-2.99872	1.51781e-09	-2.06064	4.49361e-05		-2.1482
rno-miR-132-3p	-2.16103	3.10001e-23	-3.29444	5.97484e-53	-1.03672	6.12323e-06	-2.36393	8.08671e-28		-2.21403
rno-miR-124-3p	-2.99063	6.39936e-36	-2.36347	1.623e-22	-2.11172	3.47855e-18	-1.92771	1.91319e-15		-2.34838
rno-miR-139-5p	-1.06006	2.71441e-06	-2.54124	1.6813e-31	-2.50115	1.60674e-30	-3.98219	3.74598e-77		-2.52116
rno-miR-153-3p	-2.46643	2.86384e-05	-2.62197	1.2494e-05	-2.32685	0.000115873	-3.38167	5.02142e-09		-2.69923
rno-miR-222-3p	-1.60848	1.68638e-29	-2.70612	2.9486e-82	-3.34549	1.18188e-125	-3.20673	2.16412e-115		-2.71671
rno-miR-221-3p	-1.65841	4.05035e-14	-2.90859	2.2982e-41	-3.62822	2.2592e-64	-3.78506	2.68996e-70		-2.99507
rno-miR-128-3p	-3.17486	9.70211e-104	-3.74942	6.20388e-145	-2.70248	2.77135e-75	-2.61663	7.65622e-71		-3.06085
rno-novel-miR-8-3p	-4.15017	6.39408e-07	-4.36806	1.83323e-07	-4.90349	3.56616e-09	-4.37984	1.22753e-07		-4.45039
rno-novel-miR-32-5p	-9.14987	0.00040129	-6.20612	0.0230567	-5.86329	0.0373564	-5.81059	0.0329394		-6.75747
rno-novel-miR-7-5p	-7.19309	7.8378e-07	-7.88189	6.96077e-08	-7.63223	2.09048e-07	-7.16411	9.62426e-07		-7.46783
rno-miR-551b-5p	-7.00907	0.00205223	-7.95394	0.000511281	-7.42914	0.0012892	-8.57654	0.000122868		-7.74217
rno-miR-344g	-8.20843	2.73196e-05	-7.81013	0.000103648	-7.43492	0.000213145	-8.98351	4.31663e-06		-8.10925
