# Supplementary material for: Small RNA-Seq reveals novel miRNAs shaping the transcriptomic identity of rat brain structures
Source: Life Sci Alliance. 2018 Sep 30;1(5):e201800018. doi: 10.26508/lsa.201800018 (PMC6238413; doi:10.26508/lsa.201800018)
Supplement: Supplementary file 9 [file LSA-2018-00018_TableS9.xlsx]

## Sheet: olfactive bulb
	gene name	bulb_vs_cortex		bulb_vs_hippocampus		bulb_vs_spinal_cord		bulb_vs_striatum
		log2FoldChange	padj	log2FoldChange	padj	log2FoldChange	padj	log2FoldChange	padj
ENSRNOG00000010688	Nrgn	-4.12257	2.78869e-299	-3.14378	2.3848e-173	1.91005	5.96575e-49	-3.31641	5.67196e-193
ENSRNOG00000016977	Calb2	5.35684	2.38542e-284	4.25119	5.36598e-253	0.903361	8.15715e-22	4.66847	5.0883e-200
ENSRNOG00000001245	Pcbp3	3.62103	4.67906e-267	3.47333	4.21049e-241	3.28416	1.49382e-210	3.6881	6.59198e-248
ENSRNOG00000019219	Vamp1	-3.76661	3.33201e-246	-2.642	1.1368e-119	-4.83289	0	-1.6702	1.25212e-46
ENSRNOG00000006231	Ptpro	3.99712	5.88533e-236	2.90693	1.97077e-131	3.72553	2.96346e-195	3.37517	2.0993e-164
ENSRNOG00000005332	Csdc2	2.81198	7.01731e-232	2.84521	2.46174e-229	1.5301	6.39136e-72	2.6943	1.24478e-196
ENSRNOG00000059479	Adcy1	-3.99229	3.48093e-228	-4.06818	2.10216e-236	-0.149906	0.36266	-2.62958	4.81343e-97
ENSRNOG00000059827	LOC691995	3.31844	2.71987e-227	2.10306	1.13906e-112	0.371527	3.88691e-05	0.0891745	0.42645
ENSRNOG00000017939	Chn1	-3.09229	1.76158e-199	-2.85617	6.13693e-170	0.138744	0.278277	-2.26784	8.96381e-107
ENSRNOG00000003288	Cacng5	3.88054	3.45143e-188	3.7565	2.68375e-170	4.14523	7.8771e-164	3.25755	9.91398e-126
ENSRNOG00000008203	Synpr	2.70168	7.7903e-178	2.38262	4.21175e-138	4.09284	0	0.433767	1.10532e-05
ENSRNOG00000004680	Kif5c	-3.17579	6.8901e-169	-2.59428	1.25046e-112	-1.77119	5.14002e-53	-2.51755	4.44718e-106
ENSRNOG00000031287	Cacna2d3	-3.44874	7.9112e-165	-3.46449	9.49759e-166	-1.56806	2.05018e-32	-4.37026	2.82402e-265
ENSRNOG00000026679	Scn4b	-5.3266	6.62954e-164	-3.0505	1.54083e-52	-5.76526	1.82468e-192	-7.97826	0
ENSRNOG00000012609	Trdn	7.20841	4.33835e-160	7.13416	8.85338e-146	8.90876	1.57472e-77	6.95801	1.2521e-110
ENSRNOG00000019240	Ampd2	2.34487	1.68817e-159	1.25811	1.30621e-49	1.67163	9.4425e-81	1.78141	8.59499e-89
ENSRNOG00000012747	Spock1	-2.24642	6.33722e-158	-1.80552	5.31852e-99	-2.34256	5.19008e-168	-0.912429	3.56948e-23
ENSRNOG00000019365	Ablim3	3.02711	2.16536e-156	2.62539	1.31464e-118	3.48018	6.25704e-171	3.56856	3.26806e-172
ENSRNOG00000003597	Tuba4a	-1.88696	1.13473e-150	-1.33414	3.1523e-74	-0.406764	1.72619e-07	-1.17792	7.32163e-57
ENSRNOG00000020277	Cntnap1	-2.28348	3.74261e-148	-1.54875	1.37647e-67	-0.666201	5.3636e-13	-2.36856	2.53329e-158
ENSRNOG00000018399	Cpne6	2.77094	6.03405e-148	0.467232	2.56682e-05	2.90254	2.74858e-151	2.81605	8.09777e-142
ENSRNOG00000026407	Fam184a	2.79757	4.64945e-147	3.25197	1.35557e-178	2.95673	8.97042e-144	2.17235	2.84309e-86
ENSRNOG00000018712	Camk2a	-2.42055	1.05664e-145	-2.27406	2.04104e-128	3.68237	2.33476e-266	-1.28859	1.61826e-41
ENSRNOG00000000007	Gad1	2.68993	1.59759e-145	2.69968	1.06577e-145	3.85734	1.0761e-284	1.4093	1.23953e-40
ENSRNOG00000027240	Kndc1	-2.42061	4.18739e-144	-2.86197	1.51378e-201	-3.82058	0	-1.51431	1.60754e-52
ENSRNOG00000003209	Pcp4l1	3.25017	4.5547e-142	4.49999	1.586e-236	2.07419	1.09295e-59	0.945633	2.49415e-13
ENSRNOG00000001285	Atp2a2	-1.17996	5.79932e-141	-0.925941	4.02926e-86	-0.238449	1.59301e-06	-0.962268	3.15308e-92
ENSRNOG00000009350	Sez6	1.4779	1.50722e-140	0.708148	2.06124e-33	2.41543	0	-0.529532	1.69674e-19
ENSRNOG00000006604	Thy1	-1.93916	4.95897e-140	-1.61432	1.99419e-96	-1.60123	6.74176e-95	-1.21703	2.25277e-54
ENSRNOG00000018666	Gpsm1	2.36204	2.81495e-139	2.94691	2.39827e-199	1.81635	1.39267e-81	1.83789	2.65303e-82
ENSRNOG00000002079	Mapk10	-2.32741	3.62458e-139	-1.65974	6.12844e-70	-0.711346	3.29294e-13	-0.701816	1.43023e-12
ENSRNOG00000016246	Tshz1	2.63248	2.87832e-133	3.05531	2.48282e-170	2.88541	9.07955e-149	2.66286	6.77052e-128
ENSRNOG00000025463	LOC100125362	-3.22484	4.90813e-132	-2.52282	1.8637e-80	-1.00768	2.34965e-13	-3.12847	9.08932e-124
ENSRNOG00000015691	Inka2	-2.2804	4.3497e-131	-1.57955	1.11106e-61	0.37332	0.000722303	-1.68559	3.15438e-69
ENSRNOG00000000105	Cplx2	-2.0831	6.68687e-131	-1.99922	3.19243e-120	1.67515	3.05998e-75	-1.77628	1.16648e-94
ENSRNOG00000016398	Clstn1	-2.04246	7.98369e-131	-1.2877	4.24665e-52	-0.365695	4.25855e-05	-0.863004	1.23409e-23
ENSRNOG00000015741	Slc2a13	-1.72824	1.34246e-130	-1.70537	3.09454e-125	-0.130514	0.153109	-2.25196	7.99039e-219
ENSRNOG00000047002	Fstl5	2.52658	8.56188e-130	1.59838	5.45241e-56	1.83609	2.42609e-68	1.95666	1.32484e-74
ENSRNOG00000018019	Hspa12a	-2.55407	1.95351e-129	-2.15658	1.19835e-91	-1.72399	1.65527e-58	-1.88357	2.32384e-69
ENSRNOG00000020731	Ppfia3	-2.21128	2.19095e-127	-1.25414	1.7184e-40	0.227366	0.0380306	-0.965844	1.04463e-23
ENSRNOG00000004221	Lgr5	4.32167	7.66286e-127	5.19904	1.87991e-141	3.74691	2.02265e-92	5.45598	4.9013e-118
ENSRNOG00000003207	Fmnl1	-2.21	1.18962e-125	-1.59394	4.01444e-64	0.0494325	0.721	-1.49686	2.07192e-55
ENSRNOG00000033261	Fam107a	-3.81465	1.27799e-123	-3.38095	5.90622e-97	-0.403076	0.0267112	-3.1253	5.86769e-83
ENSRNOG00000018416	Ttbk1	-1.80074	1.42023e-123	-1.11383	7.52278e-46	-0.118719	0.228898	-1.48474	2.52351e-80
ENSRNOG00000030016	Robo3	-7.62002	2.51354e-123	-6.81687	3.40405e-98	-0.38708	0.481336	-2.37393	1.99234e-10
ENSRNOG00000002364	Rnf112	-2.6304	7.89395e-122	-2.65848	1.05344e-123	-1.17858	7.39017e-24	-1.76301	5.77706e-53
ENSRNOG00000009198	Rab6b	-1.95372	1.62003e-120	-1.41028	8.68204e-63	-0.362113	4.73956e-05	-1.053	3.68696e-35
ENSRNOG00000028404	Ppp1r1b	-3.1485	3.25707e-120	-2.25936	3.55235e-60	-2.22042	2.07051e-57	-7.01289	0
ENSRNOG00000007687	Sema7a	-2.88661	2.39443e-118	-1.75074	2.98792e-43	-1.64204	4.10946e-38	-1.59839	1.00563e-35
ENSRNOG00000052376	Bend6	-2.4953	3.91741e-118	-1.20635	1.62318e-27	-1.88481	5.64596e-67	-1.16391	2.42035e-25
ENSRNOG00000000638	Zfp365	-3.41179	3.03209e-117	-2.60414	3.58725e-68	-0.423984	0.0106206	-3.38575	3.21347e-115
ENSRNOG00000011550	Kcnab2	-2.16299	9.26829e-117	-2.35651	4.21175e-138	-0.837944	1.07345e-17	-0.807315	3.78633e-16
ENSRNOG00000007364	Rab15	-2.28417	2.7264e-116	-1.97153	1.82924e-85	0.0915845	0.512294	-2.41996	1.61539e-128
ENSRNOG00000014264	AABR07027306.1	-2.12008	5.47314e-116	-1.57036	1.71897e-62	-0.397279	0.000123684	-3.22529	3.48792e-269
ENSRNOG00000001368	Rph3a	-3.86142	7.17929e-116	-2.75617	5.90876e-59	-2.81702	7.00221e-62	-3.08408	1.0877e-73
ENSRNOG00000020557	Ryr1	3.98972	7.17668e-115	1.51281	1.22797e-19	4.11175	9.64187e-107	2.98952	1.17915e-65
ENSRNOG00000004423	Zbtb18	-2.76612	1.42354e-114	-3.38287	1.62433e-171	-0.364089	0.0119771	-1.34006	2.79079e-25
ENSRNOG00000006997	App	-1.22075	2.39969e-114	-0.87518	1.22244e-58	-1.06728	3.61452e-87	-0.862157	1.27595e-56
ENSRNOG00000012061	Prkcb	-2.72708	6.16033e-113	-1.90245	6.90532e-55	0.278933	0.0466792	-2.61154	3.70769e-103
ENSRNOG00000016046	Hecw1	-2.47047	6.32267e-113	-1.06315	3.72811e-20	-0.749749	4.04743e-10	-0.766271	3.27358e-10
ENSRNOG00000016322	Camk2n1	-3.51176	1.06712e-112	-1.143	1.68947e-12	0.370402	0.0384493	-2.18673	8.73717e-44
ENSRNOG00000042140	Eomes	6.16612	1.23381e-112	7.0419	7.10514e-95	8.58914	2.50105e-62	7.56592	1.52533e-67
ENSRNOG00000005299	Kif5a	-2.49878	2.12499e-112	-1.04906	2.36897e-20	-0.0813983	0.577787	-1.4405	1.00023e-37
ENSRNOG00000022248	Fbxl16	-2.00711	2.14184e-110	-1.4057	1.73985e-53	1.70333	8.79404e-58	-2.8583	1.28252e-223
ENSRNOG00000019361	Inpp5j	2.34967	1.33924e-109	2.06924	1.16691e-84	2.94018	1.01975e-153	2.80009	9.64857e-140
ENSRNOG00000021441	Reln	2.6757	3.29615e-109	2.5259	1.06471e-96	1.74262	3.43619e-47	1.77816	1.33364e-48
ENSRNOG00000010440	Gnal	2.46321	2.94174e-108	0.916685	1.10487e-18	1.01871	1.13077e-21	-2.28702	1.67013e-129
ENSRNOG00000057626	Kif1b	-1.31659	3.88925e-108	-1.20766	1.30406e-90	-1.2262	1.15003e-93	-1.11009	2.18667e-76
ENSRNOG00000006979	Hpca	-3.37531	5.10831e-108	-4.31153	6.85043e-176	0.0411889	0.859633	-4.40397	8.41796e-184
ENSRNOG00000010199	Glrb	-1.55365	1.0595e-106	-0.862884	3.19273e-32	-1.38009	3.84758e-82	-0.571116	6.53558e-14
ENSRNOG00000023086	Arpp19	-2.79657	1.14931e-106	-0.863635	2.19434e-09	-1.59309	3.92844e-31	-3.65202	1.59442e-181
ENSRNOG00000014035	Arhgef4	-2.18079	1.77253e-106	-1.6714	5.47061e-61	-1.82333	4.94861e-72	-1.96088	6.34028e-83
ENSRNOG00000006591	Fam163b	1.55622	5.58507e-106	0.842518	2.43235e-32	2.69747	6.57179e-240	1.72836	5.03552e-116
ENSRNOG00000060350	Iqsec1	-1.87969	2.2186e-105	-1.21747	9.73987e-44	-2.21869	3.73543e-146	-1.35757	1.06767e-53
ENSRNOG00000004283	Camta2	-1.68104	1.68499e-104	-1.78682	1.83386e-117	0.03062	0.786199	-0.690278	1.43309e-17
ENSRNOG00000018200	Gad2	1.61723	4.6494e-103	1.5857	4.52797e-98	2.89175	1.26188e-298	-0.0910486	0.343039
ENSRNOG00000015538	Abcd2	-1.95918	1.75717e-102	-0.946816	1.18237e-22	-1.35203	1.26892e-45	-1.45657	1.80488e-52
ENSRNOG00000058842	Sptbn2	-1.85825	2.35722e-102	-1.49996	1.14638e-66	1.95125	8.93516e-106	-1.69602	4.34136e-85
ENSRNOG00000005309	Scn8a	-2.20049	2.79271e-102	-2.01623	1.78575e-85	-0.554647	2.97194e-07	-1.35224	2.28082e-38
ENSRNOG00000006557	Cyfip2	-1.7619	2.41871e-101	-1.16317	2.15619e-44	0.311662	0.000423712	-1.70308	1.61327e-94
ENSRNOG00000011323	Lgi3	-2.17532	2.5058e-101	-1.39927	7.60337e-41	-3.38717	1.65014e-247	-1.00584	2.13177e-20
ENSRNOG00000020021	Brsk2	-2.19804	3.99522e-101	-1.61039	6.76815e-53	-1.06125	2.11413e-22	-1.45193	1.29639e-41
ENSRNOG00000014686	Kcnd3	1.42956	6.21206e-101	0.711352	2.74647e-26	1.61463	4.0046e-114	1.67629	2.67454e-119
ENSRNOG00000020410	Th	4.78248	5.78875e-99	5.52572	1.34045e-94	6.10089	1.75246e-73	5.56993	8.97702e-74
ENSRNOG00000010799	Noct	2.16716	6.84326e-99	1.91228	2.25544e-76	2.72594	7.29129e-124	1.83701	5.90596e-66
ENSRNOG00000014863	Reck	2.38483	1.19074e-97	2.32201	2.94873e-90	3.21222	2.68802e-143	2.2106	3.06801e-78
ENSRNOG00000051170	Ddx17	1.17551	2.5145e-97	0.995355	1.94618e-69	1.24645	3.42606e-106	0.778908	2.09924e-42
ENSRNOG00000004606	Meis1	3.42079	5.09637e-97	4.22566	8.75114e-118	1.25473	3.94828e-16	1.9052	3.05792e-33
ENSRNOG00000022162	Pbx3	4.71443	7.59975e-97	4.20631	1.13771e-77	1.25186	2.93774e-08	1.7352	1.39405e-14
ENSRNOG00000016343	Dkk3	-3.26996	1.75868e-96	-3.3667	7.25204e-102	-1.96785	5.25357e-35	-1.4567	4.11535e-19
ENSRNOG00000004317	Vipr2	3.22097	5.87842e-96	3.07774	7.5386e-85	3.41953	3.09191e-84	2.86433	2.47189e-67
ENSRNOG00000042753	Fgf13	-1.72214	2.72846e-94	-2.31516	9.74053e-171	0.260369	0.00985098	-1.30309	1.83794e-51
ENSRNOG00000049407	Shisa8	5.54504	8.87307e-94	5.28962	2.49922e-85	4.14066	6.31148e-64	5.82215	1.96066e-67
ENSRNOG00000016640	Dner	1.64336	1.1091e-93	1.20614	4.25626e-51	0.177128	0.0440468	1.7459	6.63174e-95
ENSRNOG00000018029	Doc2g	3.56049	1.95176e-92	4.79043	1.97644e-108	3.29117	2.06258e-70	4.55332	6.23977e-85
ENSRNOG00000049484	Atp9a	-1.34941	1.15042e-91	-1.21671	2.07042e-73	-1.03535	2.09809e-52	-1.25232	2.73732e-76
ENSRNOG00000001173	Cabp1	-2.81064	4.68294e-91	-0.576525	0.000192096	-0.899654	1.038e-09	-0.677764	1.11825e-05
ENSRNOG00000047712	Dcx	3.36193	1.48106e-90	3.47217	2.43729e-95	4.19547	1.48423e-133	3.16832	3.73362e-79
ENSRNOG00000016244	Mical2	-2.56808	2.32845e-90	-2.09125	7.87367e-60	1.63165	1.42096e-32	-0.163716	0.326377
ENSRNOG00000000875	Fhl1	1.44555	3.74957e-90	1.10224	1.02035e-52	0.56139	1.23578e-14	1.35962	4.75538e-72
ENSRNOG00000001516	Rapgef4	-2.78907	1.53723e-89	-2.11429	1.6211e-51	0.152096	0.388352	-2.2358	1.8037e-57
ENSRNOG00000018176	Rab6a	-1.64995	1.11861e-88	-1.64287	1.50805e-87	-1.27028	1.12337e-52	-0.989083	7.84628e-32
ENSRNOG00000001314	Fam20c	1.8878	1.26404e-88	1.79554	3.71625e-78	1.73355	7.26449e-70	1.83306	2.09174e-75
ENSRNOG00000060614	Pxdn	1.85512	3.18775e-88	-0.0419798	0.736259	1.74596	3.83197e-66	0.925249	9.13666e-23
ENSRNOG00000004496	Rock2	-1.71699	4.07767e-87	-1.52645	1.74454e-68	-0.55085	1.29809e-09	-1.25206	8.33013e-46
ENSRNOG00000021102	Scn1b	-2.65564	5.95843e-87	-1.75997	4.18493e-38	-1.18962	8.29777e-18	-0.362871	0.0216028
ENSRNOG00000007110	Ankrd6	1.69896	2.29586e-86	0.970281	1.42411e-29	1.03355	2.49344e-32	1.45383	7.47962e-59
ENSRNOG00000047080	Gng4	3.83114	2.73725e-86	4.51056	8.12915e-117	3.83634	1.04047e-85	3.90184	7.05432e-88
ENSRNOG00000018784	Jph3	-2.0931	3.25696e-86	-1.75528	2.12263e-60	-0.985368	1.63108e-19	-1.70506	9.8149e-57
ENSRNOG00000014661	Zfp385d	3.03662	4.09864e-85	3.36062	6.35557e-95	2.83131	1.23966e-68	1.44878	2.37972e-21
ENSRNOG00000053258	Faim2	-1.95027	4.24106e-85	-1.31911	1.83057e-38	-1.86693	4.30659e-77	-0.921966	1.51143e-18
ENSRNOG00000004932	Sel1l3	-3.03861	1.49962e-84	-1.76405	1.18693e-27	-2.62287	9.11193e-62	-1.13867	3.54311e-11
ENSRNOG00000018126	Abca1	1.38079	2.68016e-84	1.24251	1.831e-67	1.43932	1.52578e-86	1.3284	1.38126e-73
ENSRNOG00000014290	Grm1	2.21573	2.79728e-84	0.534798	4.02342e-06	2.21635	2.04311e-77	0.485038	4.26915e-05
ENSRNOG00000049949	Hapln4	-3.04118	1.86699e-83	-3.51671	2.50574e-111	-2.79403	2.99621e-70	1.08927	5.42124e-09
ENSRNOG00000029366	Prrt2	-2.30997	4.40387e-83	-1.554	1.62807e-37	-0.539388	2.71657e-05	-1.569	6.07044e-38
ENSRNOG00000019163	Syt6	2.77309	9.58086e-83	3.98019	6.30155e-149	2.80199	2.20815e-80	0.670964	7.57356e-06
ENSRNOG00000015055	Scg2	1.99084	1.3388e-82	0.498286	4.52706e-06	0.894295	1.13586e-17	1.07457	1.34887e-24
ENSRNOG00000014530	Nav2	1.3409	1.50472e-82	1.26902	1.10382e-72	2.25297	7.70483e-198	1.99565	1.59325e-158
ENSRNOG00000031536	Syndig1	-3.74003	2.7421e-82	-3.05564	2.74323e-53	-2.7463	8.91427e-42	-4.25065	4.09768e-105
ENSRNOG00000026116	Sall3	3.18817	3.59042e-82	2.79628	1.22686e-63	2.55879	1.12934e-52	2.71021	6.27479e-57
ENSRNOG00000001130	Nos1	2.85659	5.13294e-82	1.69685	2.68814e-30	2.60465	1.72774e-66	1.16253	1.13886e-14
ENSRNOG00000013162	Zcchc12	2.36751	1.19962e-81	0.227596	0.10761	1.23522	1.28506e-23	0.309796	0.0229028
ENSRNOG00000038883	LOC294154	-1.39238	1.70624e-81	-0.824477	2.26702e-28	-0.66606	1.06272e-18	-0.887104	3.01201e-32
ENSRNOG00000012363	Peli2	1.86077	4.24186e-81	1.87553	8.1507e-78	0.723895	7.52501e-14	1.20209	5.47714e-33
ENSRNOG00000016358	Apba2	-1.82183	9.40866e-81	-2.04979	1.32784e-101	-1.42645	1.1122e-48	-0.692801	1.4475e-11
ENSRNOG00000013907	Sall1	2.2976	1.94045e-80	2.35237	2.84978e-82	0.724179	3.46965e-09	2.08871	6.95814e-64
ENSRNOG00000028580	Pcnx2	-1.48318	2.59642e-80	-1.0371	5.62056e-38	-0.0523327	0.650512	-1.01156	1.30514e-34
ENSRNOG00000042833	AABR07030521.1	1.6329	3.06013e-80	1.17533	1.91754e-42	2.6484	7.0928e-151	0.737978	5.18341e-17
ENSRNOG00000016483	Myo16	3.33153	5.69694e-80	3.37436	4.77751e-81	4.10513	1.95307e-114	4.52646	2.09107e-133
ENSRNOG00000004730	Meis2	3.27462	9.5234e-80	3.60942	3.99e-95	4.01113	1.43504e-114	0.618398	0.000988749
ENSRNOG00000020248	Ina	-1.84665	3.81567e-79	-1.21841	2.65888e-34	-1.6973	1.89966e-66	-0.59323	1.71204e-08
ENSRNOG00000015986	Rassf8	1.85703	9.21412e-79	1.94463	7.81376e-82	0.23627	0.0249657	2.18595	1.50073e-89
ENSRNOG00000011313	Sorcs1	-1.67002	1.19855e-78	-0.223425	0.0404509	-0.146365	0.207089	-1.57294	1.76164e-66
ENSRNOG00000020339	Neurl1	-2.44508	2.14254e-78	-2.18296	4.62923e-62	0.234109	0.149549	-2.5496	2.27807e-84
ENSRNOG00000038686	Ap1s2	2.19566	8.79482e-78	2.33825	7.75662e-84	0.324567	0.00871461	1.44069	1.75022e-33
ENSRNOG00000005018	Scn2a	-1.38523	9.05358e-78	-1.29985	4.37556e-68	1.32166	2.7804e-62	-1.2902	1.19906e-66
ENSRNOG00000014276	Plce1	2.97934	2.65892e-77	2.34826	5.28415e-50	2.00265	1.85123e-36	2.39483	3.65844e-48
ENSRNOG00000020058	Celsr2	-1.15717	9.80949e-77	-1.12394	8.81428e-72	0.119115	0.110083	-0.763475	9.62421e-33
ENSRNOG00000001269	Ppp1cc	1.33455	1.31785e-76	0.951463	2.74857e-39	1.28518	1.65887e-68	0.36406	1.72126e-06
ENSRNOG00000052296	Shank3	-1.96578	2.13075e-76	-1.80203	6.49886e-64	1.51969	3.17481e-39	-2.43069	3.6872e-116
ENSRNOG00000030019	Atp1a1	-1.66566	2.575e-76	-0.23704	0.0213731	-0.30411	0.00177709	-0.232493	0.0248048
ENSRNOG00000015860	Gipr	3.97601	2.80156e-76	3.13097	3.98607e-52	3.86837	2.2913e-62	1.78055	4.45446e-19
ENSRNOG00000051483	Selenow	-1.89712	3.39611e-76	-1.4843	6.04602e-46	-0.701889	1.48176e-10	-1.93332	2.27992e-77
ENSRNOG00000058202	Ppp2r2c	-1.52004	3.70587e-76	-1.24962	1.01549e-50	-0.0529295	0.651206	-1.20033	8.93905e-46
ENSRNOG00000004201	Rims2	-1.45034	3.83123e-76	-0.428936	4.68415e-07	0.981232	2.00711e-27	-1.11395	4.30302e-43
ENSRNOG00000013681	Kcns1	-7.92553	1.5779e-75	-3.356	1.0231e-12	-3.36374	1.61896e-12	-3.89578	8.98479e-17
ENSRNOG00000008921	Dynll2	-0.862344	4.9961e-75	-0.469826	4.03125e-22	-0.8857	3.86369e-77	-0.76388	1.37462e-56
ENSRNOG00000016770	Calm3	-1.15393	2.49425e-74	-1.22168	7.23992e-83	-0.431467	4.47291e-11	-0.49299	7.02704e-14
ENSRNOG00000016789	Actr1b	-1.22007	2.71405e-74	-0.806808	6.44294e-32	-0.870435	1.13615e-36	-0.708733	6.06091e-24
ENSRNOG00000059840	Unc5a	-2.32919	6.59684e-74	-2.82519	1.47906e-108	0.218039	0.203247	-0.579307	9.39732e-05
ENSRNOG00000008565	Nkiras1	-1.49841	1.01777e-73	-1.06054	5.08904e-36	-0.33272	0.000360126	-1.91803	2.54964e-118
ENSRNOG00000001492	Slc8a2	-2.4629	1.38708e-73	-2.85652	1.38373e-98	1.25051	2.45639e-16	-2.19663	6.12096e-58
ENSRNOG00000023197	Zfp608	2.56802	2.14008e-72	1.7145	1.08533e-33	2.15461	5.97072e-50	2.4994	1.94219e-63
ENSRNOG00000061450	Homer2	2.0347	2.2733e-72	1.36343	1.51003e-34	2.60978	3.68018e-88	2.71582	1.89908e-89
ENSRNOG00000009184	Foxp1	-2.1954	3.70349e-72	-1.25753	6.35282e-23	0.250524	0.122732	-3.60126	9.09184e-196
ENSRNOG00000011909	Rasa2	2.12818	9.15295e-72	1.99672	2.59776e-62	2.68213	6.16883e-101	2.35145	1.17619e-79
ENSRNOG00000023521	Map3k10	-1.60728	9.89629e-72	-1.09723	6.15002e-33	0.469483	4.3927e-06	-1.00195	7.73363e-27
ENSRNOG00000003736	Col5a2	2.41149	2.21517e-71	2.21188	1.00517e-59	2.07648	1.73564e-52	2.59836	2.44943e-78
ENSRNOG00000018110	Svil	2.77978	2.43494e-71	2.85212	2.38839e-73	2.54649	1.31165e-58	2.37198	7.30376e-51
ENSRNOG00000015480	Prkcz	-1.09389	2.7048e-71	-0.658727	2.11677e-25	-0.132051	0.0724727	-1.34599	8.4081e-105
ENSRNOG00000016728	Tiam2	1.83579	2.94985e-71	2.01877	1.7586e-82	4.76861	8.19619e-224	0.557727	1.79778e-07
ENSRNOG00000005438	Pcsk2	-1.85805	3.06195e-71	-1.67536	1.18983e-57	0.129175	0.326494	-1.93037	3.53702e-76
ENSRNOG00000002928	Guk1	-1.32279	3.30817e-71	-1.11212	2.19071e-48	-0.766566	1.26373e-21	-1.0185	6.7327e-38
ENSRNOG00000022753	Mast3	-1.59619	5.53362e-71	-1.80605	2.33681e-90	0.13398	0.22632	-1.72653	4.5568e-82
ENSRNOG00000054033	Adap1	-1.78126	5.7284e-71	-1.18829	4.04341e-31	-1.1502	5.55995e-29	-0.856296	6.53438e-16
ENSRNOG00000006226	Cacng2	-1.60771	1.49644e-70	-0.724865	3.21347e-14	-0.546581	2.58793e-08	-0.311322	0.00367245
ENSRNOG00000009450	Hcn4	3.69219	1.77637e-70	3.22753	7.16234e-56	1.81173	3.54542e-21	3.09278	1.07021e-46
ENSRNOG00000014107	Omg	-1.7824	2.16695e-70	-1.23986	5.162e-34	-1.60929	3.24515e-57	-1.13112	4.08427e-28
ENSRNOG00000010905	Dlx5	3.90558	2.7237e-70	3.76138	6.64082e-63	5.04781	1.46036e-56	0.4719	0.0168044
ENSRNOG00000032328	Diras2	-2.27816	3.64594e-70	-2.09928	5.02717e-59	0.498643	0.00105265	-2.35247	1.28216e-73
ENSRNOG00000022694	Plekhg5	-2.88149	3.97736e-70	-3.78572	4.77044e-121	-0.222999	0.297363	-1.52722	4.76608e-19
ENSRNOG00000020851	Aplp1	-0.932808	1.68748e-69	-0.860231	1.00575e-58	-1.82061	2.43587e-264	-0.92709	1.47891e-67
ENSRNOG00000061348	Fam53b	-1.48746	2.5424e-69	-1.22168	1.00352e-44	-1.19253	9.92973e-41	-1.65254	2.68799e-80
ENSRNOG00000032660	Adgrl2	-2.4288	2.6458e-69	-1.32918	1.31917e-20	-1.03309	1.18149e-12	-2.67324	5.92837e-83
ENSRNOG00000011000	Rims1	-2.9577	2.70926e-69	-2.07118	3.46561e-34	0.841694	2.81069e-06	-1.80165	5.61977e-26
ENSRNOG00000047876	LOC689986	-6.41073	3.53814e-69	0.795655	0.197226	1.57019	0.0141443	0.225411	0.765047
ENSRNOG00000037462	Eml6	2.08959	3.54594e-69	1.40266	4.73995e-33	1.31922	3.02757e-28	1.98833	1.34058e-54
ENSRNOG00000021231	Lzts3	-2.19214	3.65047e-69	-2.1154	6.74056e-64	0.728527	3.55651e-07	-3.09587	2.05654e-137
ENSRNOG00000036798	Dusp3	-1.56574	4.74735e-69	-1.3977	1.02429e-54	-1.63966	2.44633e-75	-1.37749	9.70317e-53
ENSRNOG00000011824	Trh	6.44575	5.49127e-69	4.93442	9.34879e-53	4.07741	1.01581e-38	3.73717	2.09421e-33
ENSRNOG00000018797	Myrip	-1.84316	9.67018e-69	-1.25804	2.6444e-31	-1.27436	9.50528e-32	-1.18528	5.77568e-27
ENSRNOG00000026392	Cdh12	-2.32315	2.38311e-68	-1.56545	2.5443e-30	0.523684	0.0015129	-0.207718	0.257113
ENSRNOG00000008061	Nuak1	-2.34596	2.62231e-68	-1.3757	2.94274e-23	-0.776764	7.22869e-08	-0.516921	0.00081197
ENSRNOG00000055471	Ywhah	-1.85087	3.12319e-68	-1.52205	3.39257e-46	-0.630839	8.959e-09	-0.41963	0.000284519
ENSRNOG00000003256	Ccng1	-1.46335	3.49919e-68	-1.31951	6.59717e-55	-0.432268	1.49527e-06	-0.847425	2.28205e-22
ENSRNOG00000017326	Ctbp2	1.67903	5.99208e-68	0.835219	1.65574e-18	1.51075	5.60996e-50	2.08507	2.34928e-80
ENSRNOG00000000579	Marcks	1.69511	8.41469e-68	1.23657	1.77701e-36	0.846717	8.58999e-18	0.528593	2.17268e-07
ENSRNOG00000015393	Slc32a1	1.68527	1.11467e-67	2.06254	5.52293e-93	0.871752	5.60108e-19	-0.266003	0.0112132
ENSRNOG00000001309	Camkk2	-2.14568	3.05952e-67	-1.14407	6.09031e-19	1.08786	1.563e-13	-1.16121	4.85592e-19
ENSRNOG00000017833	Actn2	1.87846	4.30372e-67	0.35196	0.000967953	2.14055	4.50927e-65	-1.97602	1.95182e-104
ENSRNOG00000018242	Camkk1	-1.85215	4.48213e-67	-2.09321	3.42894e-85	-0.593445	1.64734e-07	-0.506275	1.61867e-05
ENSRNOG00000002525	Ptgs2	-3.26921	8.42257e-67	-3.44943	6.19652e-74	1.11775	1.48858e-05	-2.06645	1.95371e-25
ENSRNOG00000050534	Gcnt1	3.2709	1.51592e-66	3.1615	4.70674e-60	2.68427	8.18241e-44	3.09026	1.35065e-51
ENSRNOG00000010816	Kcnk15	6.52912	1.78843e-66	6.92957	4.30799e-58	6.4828	2.23873e-49	6.81451	3.32491e-46
ENSRNOG00000015746	Kcng4	-4.17667	2.87954e-66	-4.00327	3.37871e-60	-5.81	1.7799e-129	-3.45119	2.16715e-43
ENSRNOG00000021569	Tiam1	1.5624	4.48776e-66	0.346266	0.000342589	3.33947	3.42931e-215	1.51867	1.09074e-58
ENSRNOG00000009726	Grip2	2.17449	1.6995e-65	3.20829	9.72417e-126	2.45094	1.07723e-76	3.14701	9.6568e-113
ENSRNOG00000016628	Scgn	5.61803	3.64686e-65	5.80514	8.99525e-62	5.94229	1.23072e-53	5.38724	1.40278e-50
ENSRNOG00000059683	Mpp2	1.25469	4.0333e-65	1.11118	2.33397e-50	1.90901	5.30269e-126	1.06138	8.98463e-44
ENSRNOG00000008709	Arhgap32	-1.77124	5.12215e-65	-0.516547	2.96041e-06	0.666694	7.508e-10	-1.43656	8.46071e-43
ENSRNOG00000023951	Tbc1d30	-2.27819	7.9334e-65	-0.996239	2.49051e-12	-0.602878	5.71988e-05	-0.977826	1.80225e-11
ENSRNOG00000014844	Kif21a	-1.44699	9.1862e-65	-1.44226	9.10278e-64	-1.44721	4.97976e-64	-1.43289	3.37499e-62
ENSRNOG00000011427	Hr	-1.6725	1.01116e-64	-0.513873	3.03941e-06	-1.48505	1.51266e-48	-0.335099	0.00590037
ENSRNOG00000023446	Btbd8	-2.09141	1.17628e-64	-0.908975	2.19436e-12	-0.682066	2.47523e-07	-1.10031	1.74416e-17
ENSRNOG00000056756	Actn1	-1.49746	1.33472e-64	-1.10174	3.83196e-34	0.284572	0.00768111	-2.97138	3.3023e-257
ENSRNOG00000026577	Cpne4	3.19961	1.41789e-64	0.369238	0.093036	4.15486	2.75121e-99	3.56264	1.35768e-75
ENSRNOG00000018122	Tspan17	-2.95376	2.81358e-64	-2.76419	1.02817e-55	-1.72362	2.76761e-21	-0.95526	1.20334e-06
ENSRNOG00000008716	Nefh	-2.04971	3.4365e-64	-1.17481	3.06264e-21	-4.6129	0	0.451214	0.00121684
ENSRNOG00000000869	Arhgef6	2.18037	3.46151e-64	1.8838	5.57416e-48	1.61069	2.32911e-34	1.84534	1.27669e-41
ENSRNOG00000019105	Dpp8	-0.854642	7.28799e-64	-0.475018	2.00479e-19	-0.13151	0.0269457	-0.243941	2.0057e-05
ENSRNOG00000051264	AABR07059679.2	4.382	8.32949e-64	3.8611	3.41027e-50	8.46162	5.0151e-78	1.91457	1.13911e-13
ENSRNOG00000004284	Btg1	2.04723	1.43186e-63	1.19982	3.92244e-23	1.70618	9.31718e-43	0.889713	6.63252e-13
ENSRNOG00000004756	Syt2	-5.83365	1.66727e-63	-3.60951	3.10928e-24	-7.11599	1.13062e-94	-4.94583	2.17209e-45
ENSRNOG00000061270	Git1	-1.36166	2.074e-63	-1.10547	9.85268e-42	0.193289	0.0362922	-0.820962	4.30994e-23
ENSRNOG00000020185	Wdr6	1.38803	4.39685e-63	0.826991	2.95056e-23	0.602438	9.17533e-13	0.774928	1.16744e-19
ENSRNOG00000001520	Dlx1	3.42607	4.68964e-63	3.62791	4.51763e-68	8.2684	3.69889e-93	2.79623	1.32838e-41
ENSRNOG00000013981	Ptpn5	-2.15155	6.61584e-63	-1.98043	6.47522e-53	-0.397417	0.00615859	-4.25156	7.98878e-247
ENSRNOG00000004560	Cacna1b	-1.67642	8.98406e-63	-1.17818	7.68297e-31	0.342148	0.00261793	-0.824203	4.02802e-15
ENSRNOG00000013213	Epha4	-2.22209	1.05619e-62	-2.70061	3.76807e-92	0.177356	0.283749	-2.16819	2.52499e-59
ENSRNOG00000001837	Sst	-2.9987	2.70061e-62	-1.83944	2.0549e-22	-2.70361	4.0101e-49	-2.84433	5.0248e-54
ENSRNOG00000008615	Mal2	-3.19159	3.05374e-62	-3.2591	1.24689e-64	-0.3633	0.113995	-2.33035	6.04592e-33
ENSRNOG00000001351	Trafd1	1.36625	3.22228e-62	0.880964	1.64112e-26	1.25367	1.32422e-49	0.900879	1.77672e-26
ENSRNOG00000014819	Hap1	2.41398	4.5877e-62	1.00292	8.79956e-12	0.822474	2.29165e-08	1.34829	4.88213e-20
ENSRNOG00000020431	Matk	-1.53909	9.74764e-62	-1.70182	1.1612e-74	0.343653	0.00204516	-1.66407	9.40114e-70
ENSRNOG00000014573	Ckmt1	-1.46506	1.71621e-61	-1.17988	2.09362e-39	-1.56727	2.278e-69	-1.09128	4.84344e-33
ENSRNOG00000016541	Enc1	-2.96355	2.28898e-61	-3.123	6.26165e-68	1.15914	7.03764e-10	-2.54881	1.80672e-45
ENSRNOG00000061176	Nudt3	-0.925402	2.60827e-61	-0.77886	1.81235e-42	-0.526681	3.89835e-19	-0.874952	7.96173e-52
ENSRNOG00000003494	Ppfia4	1.07793	6.44332e-61	0.260515	0.000143735	1.37456	3.35927e-82	0.105395	0.18588
ENSRNOG00000014550	Plcxd3	2.53838	1.22388e-60	2.40106	6.17463e-53	2.03215	6.92228e-38	1.62556	2.1471e-25
ENSRNOG00000010624	Ap3b1	1.25702	2.26627e-60	0.689703	2.07661e-19	0.0961591	0.28636	0.849253	1.13602e-25
ENSRNOG00000011748	S100a5	8.56374	2.93942e-60	7.41989	1.70279e-63	8.55021	9.46414e-50	7.76413	8.2916e-49
ENSRNOG00000014508	Mgll	-1.28905	3.69307e-60	-0.722434	1.39996e-18	0.0509009	0.656364	-0.660545	5.33984e-15
ENSRNOG00000011559	Cnn3	1.12665	3.91478e-60	0.896345	5.62056e-38	-0.0172699	0.863107	1.22984	1.50165e-65
ENSRNOG00000019339	Ttll11	-1.95047	6.47239e-60	-1.32075	6.20694e-26	0.0220351	0.919353	-1.37671	1.33253e-26
ENSRNOG00000028801	Gsap	4.46316	8.73411e-60	4.26697	1.27248e-53	3.75237	5.31116e-42	4.29831	2.0605e-44
ENSRNOG00000050949	Ttc39c	1.91721	8.73411e-60	1.13393	1.46524e-22	1.69799	2.5666e-43	2.27894	2.24104e-66
ENSRNOG00000030714	Bsn	-1.40262	1.03689e-59	-1.09754	1.1992e-36	1.82764	1.18326e-92	-0.559283	4.92719e-10
ENSRNOG00000004537	Rxrg	4.6012	1.69673e-59	1.58792	1.47367e-18	0.0445861	0.85139	-2.21944	1.77549e-48
ENSRNOG00000019097	Bap1	-0.890935	1.93038e-59	-0.784503	5.44263e-45	0.129648	0.0532203	-0.691903	2.01655e-33
ENSRNOG00000019374	Csk	1.5436	4.12305e-59	1.49246	5.0194e-53	0.453406	2.84506e-06	1.49125	3.06485e-47
ENSRNOG00000020714	Trpm4	-2.97763	9.4663e-59	-0.694964	0.00222886	-0.88651	7.3256e-05	-0.343712	0.224523
ENSRNOG00000031643	Dchs1	2.14533	1.01461e-58	1.03695	3.45203e-15	0.192059	0.201463	1.00834	6.91154e-14
ENSRNOG00000016653	Ngef	-2.6664	1.23092e-58	-0.871378	6.46047e-07	1.37544	9.72478e-15	-3.46681	1.22287e-98
ENSRNOG00000043451	Spp1	6.46991	1.33484e-58	6.72906	4.03192e-59	-0.0291073	0.960497	7.98819	6.60664e-59
ENSRNOG00000014230	Map1a	-1.19846	1.48029e-58	-0.793792	5.23449e-26	-0.75769	4.70447e-24	-0.87698	1.39123e-31
ENSRNOG00000012764	Agap3	-1.11709	2.08549e-58	-1.14777	8.99701e-61	-0.0773866	0.396089	-0.76153	7.08235e-26
ENSRNOG00000020279	Syt11	-0.621866	6.75094e-58	-0.903085	6.45816e-121	-1.13392	3.39541e-190	-0.64597	1.44228e-60
ENSRNOG00000013916	Nefm	-2.40775	8.05342e-58	-1.38491	1.71921e-19	-4.69738	1.32385e-219	-0.466225	0.0057679
ENSRNOG00000009588	Snph	-1.48764	1.10277e-57	-1.2807	1.30183e-42	0.252867	0.0160136	-0.820315	1.23211e-17
ENSRNOG00000008431	Gabbr2	-3.05161	1.18777e-57	-2.51978	2.01949e-39	-0.745672	0.000235449	-0.898803	1.05024e-05
ENSRNOG00000018390	Pld3	-1.47403	3.07501e-57	-1.34361	2.86333e-47	-0.363805	0.000278537	-0.818579	1.37202e-17
ENSRNOG00000010834	Mpped1	-2.24167	4.59834e-57	-2.245	6.77267e-57	0.397783	0.0160877	-1.46219	6.2519e-24
ENSRNOG00000028703	Slc39a6	1.16754	6.65307e-57	0.775104	7.98501e-26	0.323213	2.3294e-05	1.38924	7.50754e-63
ENSRNOG00000017023	Tcf25	-0.761483	9.09082e-57	-0.414097	6.22933e-17	-0.0415283	0.514187	-0.0951173	0.1073
ENSRNOG00000008658	Mitf	1.75538	1.01414e-56	1.82802	9.39009e-57	-0.18803	0.104732	1.83063	1.73892e-48
ENSRNOG00000016550	Dclk2	2.04489	2.89671e-56	1.23425	3.4693e-21	2.13406	1.87399e-59	0.973134	2.06608e-13
ENSRNOG00000027707	Exd2	-1.18468	3.6155e-56	-0.963332	6.51878e-36	-0.283535	0.00116114	-0.879256	3.13e-28
ENSRNOG00000004624	Rnd3	2.2989	4.41172e-56	2.15068	2.21017e-48	1.58844	2.72386e-27	1.50518	2.75917e-24
ENSRNOG00000003296	Dck	-2.13886	7.50034e-56	-0.777251	2.17879e-07	0.286861	0.122071	-0.788077	3.77247e-07
ENSRNOG00000017876	Dnajc21	-2.10769	1.02477e-55	-0.824227	2.20046e-08	-1.60811	1.03423e-30	-0.0221817	0.932208
ENSRNOG00000005284	Itpka	-4.15763	2.25174e-55	-4.50733	7.8594e-65	2.04264	9.44111e-07	-4.17955	2.11712e-55
ENSRNOG00000018094	Sv2c	2.50907	2.31511e-55	2.89693	1.74454e-68	0.0882974	0.668859	-0.367508	0.0364335
ENSRNOG00000029912	Sept5	-1.62237	2.78679e-55	-0.750653	2.09034e-12	1.60977	5.93756e-52	-0.343491	0.0027524
ENSRNOG00000007462	Sept8	-1.06553	3.4514e-55	-0.63286	1.07128e-19	-1.0717	1.63812e-55	-0.4223	4.39716e-09
ENSRNOG00000013413	Rorb	-3.0059	3.51516e-55	-1.27643	3.50668e-10	-0.954516	4.67848e-06	-1.09731	1.70889e-07
ENSRNOG00000022505	Slc17a4	4.99591	6.75357e-55	5.14577	1.35671e-50	6.22556	3.16291e-40	5.33589	7.11601e-40
ENSRNOG00000002983	Nf1x	-1.62549	7.68831e-55	-1.5209	1.64629e-47	-0.63746	8.74313e-09	-0.144264	0.302766
ENSRNOG00000030269	Atp2b2	-1.51113	1.15221e-54	0.0333278	0.828673	0.647946	9.00459e-11	-0.224292	0.0463105
ENSRNOG00000006086	Lynx1	-1.83011	1.49979e-54	-1.02486	1.93354e-17	-1.0741	2.9591e-19	-0.390107	0.00310242
ENSRNOG00000007456	Calb1	-3.0318	2.22361e-54	-3.08688	5.25801e-56	-1.41885	7.03006e-12	-4.06015	3.52754e-97
ENSRNOG00000049495	Krt71	4.74662	2.31e-54	4.23811	5.06289e-49	5.20666	4.83911e-38	0.117483	0.636881
ENSRNOG00000055530	Panx2	-2.12039	2.86909e-54	-2.09631	9.54144e-53	-1.29539	2.17289e-20	-1.21299	1.2581e-17
ENSRNOG00000012163	Plekhm2	-1.45929	3.22669e-54	-0.719944	2.17047e-13	-0.797352	2.96793e-16	-0.651993	7.88884e-11
ENSRNOG00000002821	Phlpp1	-1.06352	3.69673e-54	-1.08549	1.57927e-55	-1.20179	2.90691e-67	-0.932076	1.43085e-39
ENSRNOG00000028261	Tppp	-1.93655	3.84682e-54	-1.39104	8.51581e-28	-0.87227	2.30522e-11	-1.12209	5.67019e-18
ENSRNOG00000032048	Zfp462	1.29194	4.32572e-54	1.21259	9.0993e-47	1.09752	1.06428e-37	0.676671	4.15372e-15
ENSRNOG00000013064	Lrp8	0.899662	8.13574e-54	0.684592	4.10898e-31	1.65798	1.32216e-150	1.28785	4.84266e-95
ENSRNOG00000011984	Cxcl14	-1.45727	8.4749e-54	-0.754202	6.18268e-14	-0.912774	1.1167e-19	-0.534186	8.25939e-07
ENSRNOG00000021176	Mtmr11	1.67409	9.35267e-54	2.38487	9.00202e-89	1.78893	7.3157e-52	2.23668	2.27462e-69
ENSRNOG00000003442	Adora1	-1.45537	1.13992e-53	-1.31082	5.16568e-43	-1.14577	1.26918e-32	-0.504257	1.14191e-06
ENSRNOG00000000999	Smurf1	-1.25764	1.74847e-53	-0.7658	4.51912e-19	-0.551677	8.57836e-10	-1.43659	5.42361e-66
ENSRNOG00000055226	Dab2ip	-1.74476	2.08326e-53	-0.885841	5.76959e-14	-0.303349	0.0191839	-1.46076	1.1764e-36
ENSRNOG00000011300	AABR07031193.1	4.83009	2.48444e-53	3.32973	2.32704e-27	3.44829	6.46975e-29	3.95775	5.31593e-36
ENSRNOG00000006248	Trim37	-1.17064	3.2218e-53	-0.810793	2.55239e-25	-0.577174	4.18014e-13	-0.776148	1.03666e-22
ENSRNOG00000020746	Lin7b	-1.70961	3.52808e-53	-1.10192	6.64451e-21	0.274094	0.0773782	-1.47916	2.51968e-36
ENSRNOG00000008305	Sc5d	-1.00367	4.99311e-53	-0.838494	1.6801e-36	-2.55084	0	-0.640709	7.31719e-21
ENSRNOG00000013391	Sorbs2	-1.55535	5.1615e-53	-0.452491	3.39145e-05	1.13341	2.45872e-26	-0.796787	3.27316e-14
ENSRNOG00000013658	Nefl	-1.72063	6.60397e-53	-1.52698	1.10262e-41	-2.90151	5.75627e-150	-0.618537	1.82169e-07
ENSRNOG00000004060	Calm1	-1.26468	6.73998e-53	-0.883606	4.15897e-26	0.0520111	0.637789	-0.979673	6.2591e-32
ENSRNOG00000007765	Frzb	3.55274	1.03243e-52	1.98327	6.71933e-18	3.08209	3.03751e-39	4.89744	4.61959e-74
ENSRNOG00000010320	Efnb3	2.51255	1.04996e-52	-0.171841	0.412188	2.17822	8.27267e-39	0.0067326	0.983829
ENSRNOG00000005457	Lamp5	-2.62026	2.31357e-52	-0.146907	0.545551	-1.98956	1.84655e-30	-1.76807	7.27294e-24
ENSRNOG00000001135	Wsb2	-1.43336	3.68697e-52	-1.10377	1.20559e-30	-0.472087	3.07728e-06	-1.08862	2.78422e-29
ENSRNOG00000040201	Atp6ap1l	2.69223	3.74344e-52	3.70955	1.11993e-63	3.50522	4.73232e-50	-0.672022	1.10085e-05
ENSRNOG00000029799	Tomm34	-1.37056	4.29344e-52	-1.37013	3.9532e-51	-0.55226	2.05493e-08	-0.880985	4.85934e-20
ENSRNOG00000004783	Fam171b	1.24614	7.38766e-52	1.40197	1.24689e-64	1.91341	9.37894e-117	1.47646	1.76902e-70
ENSRNOG00000033893	Cacna1h	1.93247	1.0573e-51	-0.106107	0.537895	2.63907	6.88409e-86	0.0572015	0.759594
ENSRNOG00000017035	Cep120	1.28688	1.13086e-51	1.02735	6.24277e-33	1.04747	5.37524e-33	1.16075	5.5472e-39
ENSRNOG00000021507	Luzp2	-0.986333	1.35883e-51	-0.443182	2.08887e-10	-1.29463	5.54653e-86	-0.194603	0.0147999
ENSRNOG00000008145	Traf3	-1.6273	1.46905e-51	-1.11335	9.17492e-24	-0.492544	3.2151e-05	-0.806677	2.83147e-12
ENSRNOG00000011334	Tmem63c	-1.69217	2.60664e-51	-1.67304	1.93384e-49	-0.530596	2.12185e-05	-1.58017	7.17641e-43
ENSRNOG00000019750	Kcna1	-2.04829	2.9472e-51	-1.41827	1.91127e-24	-1.95777	1.85196e-46	-1.1478	7.09264e-16
ENSRNOG00000020706	Kcnn3	2.35805	4.02156e-51	1.2045	3.21505e-16	2.15505	3.08626e-37	0.229723	0.180012
ENSRNOG00000012906	Bcas1	-1.93988	5.99063e-51	-1.55859	6.37828e-33	-3.3133	2.49689e-148	-1.59157	3.64349e-34
ENSRNOG00000002544	Kifap3	-1.12131	6.47972e-51	-0.767007	7.5033e-24	-0.491169	2.58578e-10	-0.702284	8.09462e-20
ENSRNOG00000007882	Ablim2	-1.63232	7.27738e-51	-1.19798	6.14837e-27	-1.43047	4.09605e-38	-2.72693	1.35998e-141
ENSRNOG00000017673	Brsk1	-1.6219	9.04896e-51	-1.01035	5.13786e-20	0.0208786	0.899186	-1.05395	1.25987e-21
ENSRNOG00000009756	Pacsin2	1.04805	1.08608e-50	1.1875	5.72181e-62	0.679698	3.16519e-21	0.417577	1.49688e-08
ENSRNOG00000010280	Pde8b	-2.07949	1.36028e-50	-0.716332	1.73748e-06	0.0733024	0.717443	-2.30928	1.60606e-61
ENSRNOG00000037871	Sfxn5	-1.10995	1.36135e-50	-1.02644	6.89006e-43	-0.138476	0.116175	-1.16843	8.04933e-55
ENSRNOG00000000814	Fabp7	3.13662	1.44781e-50	1.65851	4.14662e-15	0.242025	0.334423	1.96085	2.06133e-20
ENSRNOG00000021023	Mag	-2.12573	1.60621e-50	-1.73656	1.06918e-33	-4.42331	1.2551e-218	-1.97327	3.20961e-43
ENSRNOG00000054058	Osbpl1a	-1.93596	1.89775e-50	-0.660722	1.50001e-06	-1.27092	3.06144e-22	0.0120942	0.958914
ENSRNOG00000021067	Fxyd7	-2.30254	2.09564e-50	-1.61871	2.12521e-24	-1.5202	2.55911e-21	-0.339123	0.0894803
ENSRNOG00000048686	AABR07066379.1	-1.98714	3.45781e-50	-1.46069	7.61232e-26	-2.32526	5.67108e-67	-0.555678	0.000789279
ENSRNOG00000007090	Cacna1c	1.65386	4.57492e-50	0.808863	9.04302e-13	3.09796	4.96069e-145	1.0167	3.39637e-19
ENSRNOG00000034102	Plk5	-3.76996	4.93791e-50	-3.08268	6.57549e-33	0.109687	0.8021	-3.63291	1.61819e-45
ENSRNOG00000004918	Kcna4	1.81431	7.15786e-50	0.871895	4.44512e-13	3.1551	3.22161e-87	-0.365311	0.00360955
ENSRNOG00000023453	Lrba	1.61019	1.12735e-49	1.73885	1.90667e-56	1.83356	4.74105e-61	1.06062	1.17897e-21
ENSRNOG00000005697	Slc6a11	1.72066	1.31416e-49	2.19814	1.0964e-77	1.21245	4.66347e-25	2.73069	1.35689e-110
ENSRNOG00000014650	Sema4g	1.44604	1.3654e-49	1.35354	6.08818e-42	0.813221	4.54044e-16	0.567823	2.46381e-08
ENSRNOG00000008065	Wwc1	-1.12922	1.64149e-49	-0.760372	5.88577e-22	0.822642	5.16544e-20	-0.941669	2.16527e-32
ENSRNOG00000027871	AC141969.1	-1.75626	2.08607e-49	-1.84898	2.32714e-54	0.359317	0.00903502	-0.763775	1.64906e-09
ENSRNOG00000055860	Arl8b	-0.864731	2.08607e-49	-0.897795	1.22737e-52	-0.874445	1.50375e-49	-0.584489	5.5572e-22
ENSRNOG00000011857	Mtpn	-0.977743	2.53258e-49	-0.826321	8.69555e-35	0.332553	5.70584e-06	-1.07255	1.71906e-57
ENSRNOG00000018550	Ncbp3	1.47168	2.62677e-49	1.42984	7.34575e-45	1.73749	9.84796e-58	1.55091	9.87572e-47
ENSRNOG00000011132	LOC100362814	-1.68505	1.60655e-48	-0.927977	7.91856e-15	0.687662	1.30141e-07	-1.16943	8.45969e-23
ENSRNOG00000037695	Sgpp2	-2.00252	1.66061e-48	-2.08815	3.55781e-52	-2.93993	1.2825e-104	-1.27434	1.3887e-18
ENSRNOG00000002524	Gpr37	-2.23838	2.73845e-48	-2.27323	1.58402e-49	-3.58568	5.60002e-124	-2.13623	2.22177e-43
ENSRNOG00000003732	Flrt2	-1.63842	3.15659e-48	-0.885044	8.29336e-14	0.330371	0.0196004	-0.968929	9.43807e-16
ENSRNOG00000004781	Crmp1	1.33795	3.9679e-48	1.13077	2.26721e-34	2.65698	5.385e-165	1.91455	6.03498e-91
ENSRNOG00000014723	Cbfa2t3	-2.06087	4.75292e-48	-1.99076	5.7895e-44	0.863778	6.74995e-06	-2.50896	2.02028e-69
ENSRNOG00000058586	Tyro3	-1.56995	4.979e-48	-0.705029	3.9829e-10	-0.795345	9.12689e-13	-1.21463	2.22327e-28
ENSRNOG00000011937	Sgtb	-1.63515	7.04809e-48	-0.445528	0.000320841	0.283217	0.0317809	-0.650126	7.54701e-08
ENSRNOG00000014082	Sp7	4.06053	1.05537e-47	4.3588	3.82765e-46	1.38046	4.51116e-09	3.63404	1.71513e-33
ENSRNOG00000057040	Spns2	-1.71933	1.34412e-47	-2.05564	1.37647e-67	-1.67455	2.11343e-43	-0.885041	1.29813e-11
ENSRNOG00000058522	Fam214a	1.33419	1.79319e-47	1.48785	5.6666e-57	1.64614	1.79989e-66	1.01697	6.82413e-27
ENSRNOG00000008169	Slc24a2	-3.49044	1.85452e-47	-3.12216	4.68555e-38	-2.46064	3.21842e-24	-2.81316	4.68233e-31
ENSRNOG00000031136	Ntng1	1.90833	3.073e-47	1.2178	3.89268e-20	2.39093	4.64612e-64	3.28951	1.03635e-97
ENSRNOG00000053562	Arx	2.0165	4.41483e-47	2.22072	6.47522e-53	7.61694	2.19782e-62	1.50138	3.68306e-25
ENSRNOG00000014302	Dlgap3	-1.581	4.41483e-47	-0.980068	2.51136e-18	1.75438	6.17366e-48	-2.22567	2.02066e-92
ENSRNOG00000002488	Galnt10	1.87677	4.57836e-47	1.31567	9.35034e-25	0.188123	0.182415	1.22322	1.80956e-19
ENSRNOG00000002935	Ankrd40	-0.879206	6.6192e-47	-0.462446	5.08272e-13	-1.24871	2.20666e-92	-0.534986	1.61926e-16
ENSRNOG00000009700	Dync1i1	1.1915	6.87937e-47	1.21332	9.84923e-48	1.72561	2.75699e-90	1.81698	8.61669e-98
ENSRNOG00000001707	Vwa5b2	-2.34079	7.11187e-47	-1.46411	1.84796e-18	-1.00664	3.47716e-09	-0.592611	0.0012512
ENSRNOG00000014367	Ephb6	-2.64401	8.39205e-47	-1.83173	1.74347e-22	-0.593692	0.00382645	-1.38324	7.1973e-13
ENSRNOG00000037793	Cdk5r2	-1.72994	9.29661e-47	-0.768448	1.15593e-09	1.10619	8.15914e-17	-1.16843	3.86861e-21
ENSRNOG00000006532	H3f3b	1.20909	9.46728e-47	0.914736	5.92257e-27	0.543174	2.89632e-10	0.829997	6.53902e-22
ENSRNOG00000006649	Thrb	-2.20725	1.13717e-46	-1.67897	7.06792e-27	-1.07671	1.86462e-11	-2.284	2.76432e-49
ENSRNOG00000003832	Vash2	2.80182	1.15988e-46	2.88645	1.43372e-45	1.79272	1.05903e-20	2.79982	1.5005e-37
ENSRNOG00000022921	Dact2	-3.59757	1.54371e-46	-1.3584	4.04467e-07	0.015519	0.972348	-2.0016	1.78431e-14
ENSRNOG00000021128	Kcnj11	-1.43282	2.67085e-46	-0.609473	5.22054e-08	-0.443152	0.000238761	-0.882459	5.05975e-15
ENSRNOG00000058975	Iqsec2	-1.02668	3.18292e-46	-0.860708	3.28379e-32	1.39884	5.51833e-68	-0.461919	1.60395e-09
ENSRNOG00000014296	Syt10	3.06041	3.4101e-46	3.50508	1.10243e-55	3.55046	2.02776e-53	1.3305	7.12205e-10
ENSRNOG00000021745	Bhlhe22	-3.65649	3.85262e-46	-5.68777	3.46227e-112	-1.43342	4.38403e-07	0.27704	0.519775
ENSRNOG00000014330	Pcmt1	-1.39693	4.03817e-46	-1.16053	4.11926e-31	-1.47324	9.62089e-50	-1.41262	5.41865e-45
ENSRNOG00000011160	Sv2b	-1.85204	4.74482e-46	-1.78605	9.61994e-43	0.468129	0.000899856	-1.07384	8.16814e-16
ENSRNOG00000009949	Pcdh18	2.33028	5.11982e-46	2.52874	3.73239e-50	1.52038	2.29892e-20	2.19761	1.75014e-36
ENSRNOG00000016467	Kctd1	-1.82124	6.42545e-46	-0.622563	7.15113e-06	0.165996	0.319009	-2.25299	2.91365e-69
ENSRNOG00000007032	Amigo2	2.23242	8.17677e-46	1.53744	4.28606e-23	2.42107	1.04929e-45	1.16827	2.06343e-13
ENSRNOG00000027194	Sgsm2	-1.28424	1.0234e-45	-1.42564	1.00497e-55	0.255942	0.0163627	-1.79016	4.04925e-87
ENSRNOG00000015554	Ankdd1a	3.76223	1.28774e-45	0.578305	0.0109201	2.37711	2.32912e-22	0.150077	0.595447
ENSRNOG00000004693	Pbx1	1.96514	1.96754e-45	2.22053	1.12717e-56	3.31729	4.74797e-115	2.00806	5.82474e-46
ENSRNOG00000013312	Kcnt2	-3.36388	1.96754e-45	-3.46654	5.02225e-48	-0.95863	0.000268497	-1.53215	1.8315e-09
ENSRNOG00000060123	Kifc2	-1.7154	2.25474e-45	-1.05877	1.28801e-17	0.806459	2.94227e-10	-0.854682	1.15557e-11
ENSRNOG00000002886	Myh10	-1.13456	2.4192e-45	-0.69683	1.95002e-17	-0.261578	0.00265221	-1.41821	4.65415e-70
ENSRNOG00000046227	Tprg1l	-1.05545	3.31535e-45	-1.01203	1.41072e-40	-1.30865	4.33037e-67	-0.81958	3.26265e-25
ENSRNOG00000023643	Mmp17	-3.02502	4.01966e-45	-2.50659	2.23733e-30	-0.537838	0.0465387	-2.80853	1.20478e-37
ENSRNOG00000013742	Large1	-1.01371	4.76293e-45	-0.861536	4.28612e-32	0.604887	3.02798e-14	-0.563809	1.35725e-13
ENSRNOG00000003984	Apln	-2.13659	4.98019e-45	-1.28176	7.41438e-16	-1.96039	7.27021e-37	-1.62299	1.32354e-24
ENSRNOG00000020299	Klc2	-1.40803	7.94639e-45	-0.752278	3.35753e-13	-0.766147	8.5119e-14	-0.113976	0.390734
ENSRNOG00000007338	Fbln2	2.05331	8.0184e-45	0.985842	5.06029e-12	0.529928	0.000301634	0.895093	1.54663e-09
ENSRNOG00000012098	Adcyap1r1	1.40207	8.17322e-45	0.289343	0.00881212	0.481165	3.2259e-06	0.712323	4.20485e-12
ENSRNOG00000006503	Frmd3	2.48654	1.062e-44	2.5149	2.04976e-42	1.84578	1.8573e-24	1.81922	4.06179e-23
ENSRNOG00000061768	Slc43a3	3.22374	1.19502e-44	2.46908	8.47278e-29	3.29393	5.28019e-38	2.65823	1.46315e-28
ENSRNOG00000004207	Eml5	2.6068	1.23632e-44	1.68451	3.49989e-19	3.89433	2.54396e-93	2.72937	6.62996e-48
ENSRNOG00000018141	RGD1307443	-1.74097	1.31433e-44	-2.22389	1.10555e-72	-1.2972	3.65574e-23	-1.42004	2.50363e-27
ENSRNOG00000061519	Asap2	-1.62127	1.56048e-44	-1.59351	3.07711e-42	-1.85031	1.50278e-56	-0.521204	0.000109353
ENSRNOG00000031612	Gls2	-1.57888	2.11127e-44	-0.582945	2.6746e-06	-0.575775	4.34912e-06	0.120402	0.480231
ENSRNOG00000013123	Scube2	2.24783	3.48675e-44	0.936805	4.19666e-09	3.54776	5.87538e-70	2.39843	2.20665e-42
ENSRNOG00000018105	Thtpa	-0.922258	3.75938e-44	-0.429335	1.32377e-09	-0.757559	5.09455e-28	-0.676323	8.36261e-22
ENSRNOG00000001270	Hvcn1	4.47381	4.96401e-44	4.16272	1.1966e-38	3.19766	4.05914e-26	2.46623	9.88251e-18
ENSRNOG00000005861	Hsd11b1	-2.05391	7.52797e-44	-2.04343	9.2913e-43	0.0814805	0.727207	-0.907703	4.10009e-08
ENSRNOG00000050220	Nrxn1	-1.17787	9.40463e-44	-0.7807	1.79597e-19	0.210123	0.02818	0.0922704	0.413644
ENSRNOG00000027463	Adamts3	2.10968	1.10046e-43	0.755212	1.13808e-06	3.23562	4.20887e-78	0.313532	0.0692552
ENSRNOG00000006471	Pvalb	-3.64618	1.12329e-43	-2.25648	6.55466e-17	-2.8244	2.10675e-26	-0.407254	0.238012
ENSRNOG00000059406	Ier5	-1.76796	1.12329e-43	-0.284609	0.0708253	1.07323	1.83552e-11	0.107732	0.586345
ENSRNOG00000013729	RGD1306271	-1.172	1.18553e-43	-0.549086	7.0501e-10	0.653885	3.95288e-12	-0.167465	0.113444
ENSRNOG00000032590	Ttc28	1.38494	1.26927e-43	1.45575	8.41589e-46	1.21834	1.48793e-31	1.55046	1.55396e-46
ENSRNOG00000015618	Wnt5a	3.28685	1.28347e-43	3.48277	2.17192e-46	2.88194	8.03048e-33	3.88846	4.29579e-50
ENSRNOG00000013330	Cdhr1	6.47699	1.39088e-43	6.20258	6.20287e-40	6.59684	6.41769e-45	4.81838	1.32947e-24
ENSRNOG00000016180	Pdp1	-1.8244	2.15206e-43	-0.22402	0.177189	0.381362	0.0133133	-2.00125	2.18626e-51
ENSRNOG00000052113	Ppp1r9b	-1.16165	2.24201e-43	-1.09625	1.43697e-38	1.22693	2.59353e-46	-1.19099	2.49971e-45
ENSRNOG00000058096	AABR07021704.1	2.18858	2.2662e-43	2.36095	1.8428e-46	3.48601	2.20369e-65	2.61271	6.1885e-47
ENSRNOG00000014524	S1pr3	2.50119	3.07186e-43	2.59437	2.84865e-44	1.591	1.93172e-18	2.8884	1.08147e-47
ENSRNOG00000005655	Cpa6	7.15967	3.12679e-43	5.29535	1.7236e-40	6.60331	5.21398e-35	6.77325	4.48124e-34
ENSRNOG00000013661	Kif26a	1.69741	3.27802e-43	1.80869	2.32517e-45	1.70757	1.85291e-37	1.39576	2.38956e-26
ENSRNOG00000021140	Kcnk4	-3.38808	3.63597e-43	-1.84156	6.39688e-13	-0.30669	0.34279	-1.10568	5.64706e-05
ENSRNOG00000033688	Cep170b	-1.45806	3.67876e-43	-1.18903	9.66595e-29	0.0502498	0.735045	-0.619197	2.72784e-08
ENSRNOG00000009054	Elmod1	-1.29859	3.6996e-43	-1.46661	1.41105e-54	-0.0325077	0.81452	-2.2288	5.89252e-126
ENSRNOG00000006831	Pgr	-3.1394	3.9196e-43	-1.99885	3.93621e-17	-0.129931	0.71894	-1.70407	4.75157e-12
ENSRNOG00000010170	Tubb4b	-0.92774	4.17322e-43	-0.874793	1.12005e-37	-1.2002	2.2554e-70	-0.445337	9.06987e-10
ENSRNOG00000019203	Eya2	4.37242	4.44824e-43	4.64741	7.31226e-45	2.42252	2.1069e-15	4.36966	7.15498e-38
ENSRNOG00000020578	Ceacam1	2.5186	4.89769e-43	1.11578	4.37856e-11	1.86545	1.69596e-23	1.82213	6.65056e-22
ENSRNOG00000006235	Nell2	-1.8335	6.09876e-43	-2.6043	7.24279e-86	0.393061	0.00774161	-1.49016	2.25579e-28
ENSRNOG00000003767	Rps6kc1	-0.943107	7.20803e-43	-0.627989	3.22889e-18	-0.105002	0.25439	-0.625835	1.03206e-16
ENSRNOG00000008214	Fbxo9	-1.09985	8.266e-43	-0.808204	1.92506e-22	-0.490637	2.1731e-08	-0.526446	3.28548e-09
ENSRNOG00000019973	Arl3	-0.890623	8.41552e-43	-0.725817	2.91456e-27	-0.462852	9.61874e-11	-1.08391	1.70777e-58
ENSRNOG00000011859	Eif5a2	-1.20894	8.55017e-43	-0.877572	2.62035e-22	-1.79749	1.50266e-93	-0.611092	9.29096e-11
ENSRNOG00000018285	Kcna2	-1.43887	1.05133e-42	-0.184221	0.148357	-1.12096	2.31059e-26	0.169734	0.190389
ENSRNOG00000047574	Nrxn3	1.21178	1.10494e-42	1.38783	5.85067e-55	2.30232	4.50232e-142	0.836561	1.70619e-20
ENSRNOG00000057059	AABR07018857.1	-1.93836	1.26878e-42	-1.35171	1.10556e-19	-1.65488	6.06879e-29	-0.3624	0.0602482
ENSRNOG00000016708	Necab3	-3.12534	1.3887e-42	-2.20739	4.99373e-21	-2.48219	1.44981e-26	-1.23048	1.21015e-06
ENSRNOG00000017671	Rasa3	1.71122	1.77019e-42	1.49787	1.52608e-32	1.95404	1.11537e-53	2.32548	2.06379e-73
ENSRNOG00000016225	Fgd3	2.2799	2.4448e-42	2.26865	1.2728e-40	-0.191983	0.322473	2.16486	3.52085e-35
ENSRNOG00000015614	Ppp1r16b	-1.23139	2.44762e-42	-0.917285	2.78605e-23	-1.02282	1.09158e-28	-1.55728	4.18777e-66
ENSRNOG00000009206	Fezf2	-3.91006	2.50358e-42	-4.19761	1.55097e-48	2.47529	4.50649e-06	-2.62856	5.01336e-18
ENSRNOG00000000129	Phf24	-1.62226	2.58362e-42	-0.552774	1.67263e-05	0.671256	3.42416e-07	-1.37533	7.0069e-30
ENSRNOG00000008377	Wdtc1	-0.900315	2.59863e-42	-1.00667	1.57533e-51	-1.10156	2.35078e-59	-1.22348	7.16299e-73
ENSRNOG00000015088	Prune2	1.38238	2.59863e-42	1.2146	1.98783e-32	1.85101	3.87238e-68	1.67179	6.3437e-56
ENSRNOG00000010731	Gpm6a	-1.18033	3.10433e-42	-1.11863	7.22946e-38	0.93826	2.8761e-26	-0.936552	1.15817e-26
ENSRNOG00000004048	Lrrk2	-1.9667	3.37222e-42	-1.51537	7.1377e-25	-0.557014	0.000455699	-3.4692	5.79408e-131
ENSRNOG00000046639	Itgae	3.02353	3.53936e-42	3.0915	1.4082e-41	2.3541	1.00685e-25	3.30939	1.45192e-40
ENSRNOG00000053122	Scn1a	-2.64932	4.00007e-42	-0.638516	0.00306258	-1.63476	1.2503e-16	-0.388103	0.095981
ENSRNOG00000019560	Pde2a	-1.22918	7.45588e-42	-1.24704	7.89353e-43	2.13153	1.30307e-101	-2.27198	1.31705e-141
ENSRNOG00000005934	Mlip	-2.53342	8.20622e-42	-1.14794	6.22055e-09	2.02753	3.54899e-17	0.289597	0.25553
ENSRNOG00000003253	Qdpr	-1.52939	9.98896e-42	-1.20799	9.91254e-26	-2.51044	3.66888e-112	-1.10134	6.12498e-21
ENSRNOG00000016671	Dtna	-1.12535	1.04119e-41	-1.10978	1.12271e-39	-0.947414	4.29984e-28	-1.02602	2.04325e-32
ENSRNOG00000004117	Kcnv1	-1.68666	1.1686e-41	-0.242691	0.122747	4.16428	1.17615e-50	-0.956766	8.48368e-13
ENSRNOG00000012196	Asah2	-2.39227	1.34726e-41	-0.842004	1.40384e-05	-3.7787	5.00444e-104	-1.37594	2.02362e-13
ENSRNOG00000025174	Kat6a	0.795834	1.35785e-41	0.79481	2.08369e-40	1.07143	3.91903e-68	0.811548	6.23012e-40
ENSRNOG00000046536	AABR07016141.1	-1.84493	2.3448e-41	-1.18659	5.61491e-16	-2.29492	3.40918e-62	-0.435382	0.0178009
ENSRNOG00000006146	Trim54	-5.64064	2.63975e-41	-2.1337	1.1507e-05	-0.454599	0.522899	-0.529283	0.472663
ENSRNOG00000057817	Epb41l1	-1.20183	2.81909e-41	-0.735831	8.52079e-16	-0.220423	0.0275976	-0.963409	2.25236e-26
ENSRNOG00000022432	Tmem59l	-1.39	2.83725e-41	-1.29149	2.16307e-35	-0.816248	1.48981e-14	-0.323629	0.00597556
ENSRNOG00000023389	Ephx4	-2.72852	2.92887e-41	-0.836359	0.000208644	1.28503	5.53343e-07	-1.67221	3.53223e-15
ENSRNOG00000057703	Cabp7	-3.03006	3.30741e-41	-6.89289	1.97518e-222	-5.77071	5.67003e-155	-2.99492	2.7575e-38
ENSRNOG00000049939	AABR07066677.1	-1.829	3.4725e-41	-1.22493	1.22377e-17	-2.26425	1.02735e-61	-0.659698	4.87782e-05
ENSRNOG00000015418	Klhl14	4.49027	4.94843e-41	2.3583	2.07936e-14	3.51559	1.59154e-26	6.34202	7.14568e-40
ENSRNOG00000031814	Sort1	-1.36969	5.1173e-41	-1.17555	2.75198e-30	-0.870561	3.36702e-17	-1.11142	4.20894e-27
ENSRNOG00000046975	Sult4a1	-1.17392	7.31697e-41	-0.898171	7.76027e-24	-0.908202	2.32998e-24	-0.457389	1.34445e-06
ENSRNOG00000031269	RGD1304694	-0.913675	7.34459e-41	-0.739594	5.82152e-26	-1.74283	8.82692e-148	-0.876133	1.04604e-34
ENSRNOG00000043182	Sept6	-1.41048	8.42082e-41	-0.602626	9.69666e-08	-0.311333	0.0103668	-0.759479	1.89509e-11
ENSRNOG00000017210	Slc22a23	-0.929006	9.91565e-41	-0.64658	2.49148e-19	-1.92998	5.51901e-176	-1.30988	9.50336e-78
ENSRNOG00000007104	Itpr1	-2.51594	1.25592e-40	-2.0646	1.62846e-27	0.89909	5.24384e-06	-3.30408	1.54558e-69
ENSRNOG00000008463	Rundc3b	-1.53192	1.33392e-40	-1.67699	9.58695e-48	-1.10727	2.85361e-19	-2.45118	4.0453e-103
ENSRNOG00000007230	Kank3	2.1839	2.04442e-40	2.81237	1.17459e-59	2.8541	8.22176e-57	2.51669	5.63515e-46
ENSRNOG00000004998	Jakmip1	-1.38019	2.36039e-40	-1.15196	1.12285e-27	0.219436	0.0873319	-1.85885	1.41205e-71
ENSRNOG00000023781	Plec	-1.16308	2.59307e-40	-0.552067	1.25803e-09	-0.560186	4.88947e-10	-0.74849	7.0783e-17
ENSRNOG00000002506	Cdkl2	-1.52156	2.67682e-40	-1.83458	4.53015e-58	-1.18274	7.1312e-24	-1.65989	1.3778e-46
ENSRNOG00000060045	Pi4ka	-0.699524	2.73528e-40	-0.67591	3.94927e-37	0.236105	4.07535e-05	-0.626567	3.07406e-31
ENSRNOG00000014173	Smc3	0.890299	2.82937e-40	0.653229	8.2461e-22	0.980023	2.21486e-44	0.386239	5.71646e-08
ENSRNOG00000018290	Alx3	4.54962	3.04663e-40	5.54493	1.01855e-38	6.87028	1.80058e-33	5.77404	4.56057e-31
ENSRNOG00000043350	Cap2	-1.26398	3.04663e-40	-1.24204	1.757e-38	1.70828	1.97422e-54	-0.962967	7.43313e-23
ENSRNOG00000014323	Extl2	-1.67872	3.85393e-40	-1.39623	3.10765e-27	-1.56288	8.03007e-34	-1.95866	4.69819e-53
ENSRNOG00000016255	Podxl2	1.29283	4.41278e-40	1.54835	2.4878e-54	0.651789	6.5104e-11	1.65731	1.87719e-57
ENSRNOG00000018205	Ttl	-1.62436	5.49146e-40	-0.395326	0.00500753	-0.130184	0.43	-1.37089	2.45174e-27
ENSRNOG00000019956	Kdm4a	0.901275	5.86352e-40	0.655633	2.73571e-21	0.704667	2.97401e-23	0.578534	8.20726e-16
ENSRNOG00000008000	Syt13	-0.961511	6.20867e-40	-0.152404	0.0819066	1.55305	7.90371e-75	0.0799806	0.426668
ENSRNOG00000049351	Nat8l	-1.30628	7.56526e-40	-0.293226	0.008091	-0.869627	3.93019e-18	0.104024	0.429748
ENSRNOG00000050318	Fsd1	-1.51359	8.65049e-40	-1.12839	4.49759e-21	-1.245	9.61745e-25	-1.21425	6.66672e-23
ENSRNOG00000001057	Ctxn1	-1.52507	9.20702e-40	-0.617939	3.71933e-07	2.47368	7.21735e-85	-1.15812	5.71441e-23
ENSRNOG00000029798	Lrrc4c	-1.28743	9.2517e-40	-0.725399	1.11034e-12	-0.136655	0.271982	-1.56477	5.54088e-57
ENSRNOG00000000257	Smpd3	-1.42724	1.00634e-39	-1.88825	4.43461e-69	-0.278148	0.0300983	-3.54912	2.4214e-250
ENSRNOG00000058478	Mapk8ip1	-0.906027	1.00634e-39	-0.613532	2.38561e-18	-0.86926	3.21544e-36	-0.841114	1.61671e-33
ENSRNOG00000013147	Cacna1d	1.35679	1.05804e-39	1.07663	3.5669e-25	3.09481	4.44169e-178	1.64972	3.97474e-56
ENSRNOG00000033026	Dclk3	-2.08896	1.06916e-39	-0.117571	0.630329	-0.383397	0.0478092	-2.68991	1.0229e-64
ENSRNOG00000011211	Pex5l	-2.46837	1.1563e-39	-1.90138	1.13636e-23	-2.22084	2.38737e-32	-1.17437	1.96627e-09
ENSRNOG00000024264	Amz1	2.75571	1.42323e-39	2.21553	3.33718e-26	2.8851	2.39431e-39	1.52408	5.62931e-13
ENSRNOG00000003121	Rtn4rl1	-1.83376	1.54149e-39	-1.854	5.34869e-40	1.13958	7.54126e-12	-1.43124	2.41485e-23
ENSRNOG00000021202	Rtn3	-0.802583	1.86853e-39	-0.785281	1.32833e-37	-0.91337	7.17581e-51	-0.557401	3.61855e-19
ENSRNOG00000020526	Mau2	0.758935	2.49656e-39	0.599033	2.01718e-24	1.11185	3.21525e-75	0.56681	4.88855e-21
ENSRNOG00000019613	Syt9	3.44755	2.55674e-39	2.82731	3.37281e-29	0.848589	0.000217703	-0.0548768	0.867605
ENSRNOG00000047505	Tubb4a	-1.38699	2.65693e-39	-1.19112	4.63442e-29	-2.65307	1.233e-142	-0.879534	3.56774e-16
ENSRNOG00000038068	Pcdh9	-1.74388	2.79201e-39	-1.08159	2.25532e-15	-1.20578	4.4728e-19	-0.410392	0.00653421
ENSRNOG00000008058	Tmprss5	1.70853	2.81281e-39	2.38882	2.58277e-59	-1.93265	9.91671e-69	1.62745	2.98228e-29
ENSRNOG00000017227	Ppme1	-1.22962	2.92103e-39	-0.334315	0.00126053	0.191663	0.0836345	-0.297814	0.00522007
ENSRNOG00000005063	Atl1	-1.02038	4.14998e-39	-0.986019	5.85702e-36	-0.166812	0.0712161	-0.899237	4.23562e-29
ENSRNOG00000002129	Lrrc8b	-1.01813	4.27195e-39	-0.342362	6.32884e-05	0.876612	3.0707e-22	-0.659658	1.40688e-15
ENSRNOG00000004742	Chp1	-1.02736	5.17147e-39	-0.666618	2.47124e-16	-1.16918	3.51926e-49	-0.362965	3.59245e-05
ENSRNOG00000009681	Flot2	-1.39232	5.57392e-39	-0.933196	2.22722e-17	-1.08834	2.72354e-23	-0.762511	2.1482e-11
ENSRNOG00000014761	Rasd2	-1.61372	6.05305e-39	-0.497626	0.00021993	2.05765	4.17022e-47	-4.08463	3.83959e-249
ENSRNOG00000004180	Fam19a2	-2.33932	8.3948e-39	-2.50986	2.43592e-44	-1.11534	3.8791e-09	-0.261725	0.277073
ENSRNOG00000014291	Elp3	-1.14547	9.30236e-39	-0.2771	0.00539262	-0.297473	0.00232937	0.000944621	0.998286
ENSRNOG00000019120	Hmgcs2	3.7632	1.03221e-38	2.7731	3.50731e-22	2.91117	7.52668e-24	3.23181	6.8617e-28
ENSRNOG00000029185	Rasa1	1.13271	1.09171e-38	1.29681	4.40356e-49	1.61994	2.69167e-72	1.55305	5.807e-66
ENSRNOG00000004032	Tmem94	-1.01904	1.09407e-38	-0.428069	3.35324e-07	-0.0162115	0.896757	-0.613736	1.64444e-13
ENSRNOG00000003177	Mat2b	-1.2702	1.32206e-38	-0.381152	0.000417949	0.606307	3.24405e-08	-0.707286	8.41346e-12
ENSRNOG00000000033	Tmcc2	-1.13398	1.49704e-38	-1.21896	5.26815e-44	-1.61515	3.8534e-77	-1.01084	1.20082e-29
ENSRNOG00000001010	Tecpr1	-1.04451	1.59541e-38	-1.21691	1.3689e-51	-0.248848	0.0062429	-0.40659	4.56363e-06
ENSRNOG00000018153	Rbm5	0.817157	1.66072e-38	0.516823	8.13346e-16	0.732809	4.92553e-30	0.340472	3.27889e-07
ENSRNOG00000027099	Fbxl2	-1.72243	1.81398e-38	-1.54552	7.14144e-30	0.702984	0.000151392	-1.10685	5.0098e-14
ENSRNOG00000016952	Uqcr11	-1.05532	1.81398e-38	-0.884759	4.25929e-26	-0.0149502	0.912867	-1.08391	2.1754e-37
ENSRNOG00000006787	Dhcr24	-1.15448	1.95673e-38	-1.15679	5.48192e-38	-3.62604	0	-0.781097	7.00228e-17
ENSRNOG00000018812	Rpp25	2.36039	1.98154e-38	3.10324	1.0592e-53	2.74196	5.50533e-41	2.8484	1.57874e-41
ENSRNOG00000030111	Cyp11b3	-6.18654	2.2119e-38	-1.59508	0.00542652	0.122539	0.89303	-1.60314	0.00702309
ENSRNOG00000009872	Kcnh2	1.44522	2.25741e-38	2.20196	1.58848e-78	0.472201	4.46394e-05	1.85211	4.28287e-54
ENSRNOG00000000054	Abhd8	-1.4536	2.35259e-38	-0.901823	7.00411e-15	-0.310108	0.0146899	-0.743248	4.3803e-10
ENSRNOG00000025587	Plagl1	3.84127	3.20754e-38	1.29693	9.8344e-06	1.86576	9.47565e-11	3.88262	2.60401e-34
ENSRNOG00000020417	Gsk3a	-1.02476	3.4464e-38	-0.58217	1.49677e-12	0.0564918	0.60404	-0.511117	1.37697e-09
ENSRNOG00000007705	Kcnj10	-1.30097	3.9822e-38	-0.39082	0.000456732	-1.92537	1.23914e-82	-0.369023	0.00130046
ENSRNOG00000014751	Ret	2.44934	4.14831e-38	1.04681	9.12111e-09	-2.04316	9.99445e-36	3.13954	1.51009e-41
ENSRNOG00000011452	Aldoc	-1.37281	6.73835e-38	-0.765859	2.70769e-12	-1.8986	4.09612e-72	-0.748762	9.87414e-12
ENSRNOG00000009539	Khdrbs3	-1.38382	7.04846e-38	-1.46531	4.82599e-42	-0.21938	0.0837669	-0.163185	0.241704
ENSRNOG00000001519	Dlx2	3.917	7.23619e-38	3.98503	1.69544e-36	6.67943	4.59412e-39	2.39159	4.28207e-16
ENSRNOG00000033110	Svep1	2.83517	1.3974e-37	0.269738	0.30818	2.37785	5.35783e-26	1.74032	6.35285e-15
ENSRNOG00000004410	Pax6	2.72883	1.49491e-37	2.43205	8.0975e-30	2.21414	1.67995e-24	1.83538	2.03213e-17
ENSRNOG00000039048	Cd200r1	-4.46881	1.63421e-37	0.414287	0.477625	0.283429	0.636104	0.103051	0.884279
ENSRNOG00000003399	Hnrnph1	0.827251	1.72829e-37	0.680006	2.52071e-25	1.27972	1.55587e-83	0.54111	4.37896e-16
ENSRNOG00000005258	Myef2	0.739198	1.7465e-37	0.432207	2.61721e-13	1.00224	3.82563e-59	0.448492	2.56703e-13
ENSRNOG00000053196	Slc48a1	-1.01935	1.91642e-37	-0.803481	9.00929e-23	-2.27672	2.57564e-188	-0.721205	1.28876e-17
ENSRNOG00000033508	Mink1	-0.784389	2.49078e-37	-0.964094	9.64902e-56	0.52648	2.03318e-16	-1.31027	2.95763e-102
ENSRNOG00000002343	Uchl1	-1.16717	2.61143e-37	-1.4821	1.50031e-59	-1.77762	9.25007e-86	-1.14694	1.69184e-35
ENSRNOG00000014060	Mras	-1.24586	2.65336e-37	-1.01963	5.57146e-25	-0.492422	1.4773e-06	-0.874836	2.19875e-18
ENSRNOG00000020644	Nsg2	0.848836	2.72688e-37	0.307817	1.17502e-05	2.1887	4.11847e-226	0.134104	0.0858738
ENSRNOG00000056955	Bicdl1	-1.22618	2.77639e-37	-0.733524	4.45124e-13	0.768973	9.19796e-11	-1.0446	4.61265e-25
ENSRNOG00000011422	AABR07043951.1	-1.15113	2.86778e-37	-0.597969	6.10033e-10	-0.961629	2.23327e-24	-0.728158	1.33159e-13
ENSRNOG00000032297	Msmo1	-1.14529	3.53589e-37	-1.22027	1.47153e-41	-2.76695	1.85461e-219	-1.01589	6.82855e-28
ENSRNOG00000003721	Paqr4	-1.40138	3.81556e-37	-0.904332	3.21527e-15	-1.38651	4.12363e-35	-0.706668	4.71303e-09
ENSRNOG00000013177	Map3k1	3.51724	3.9755e-37	3.37011	5.59581e-33	2.99284	2.3251e-25	2.34506	2.10728e-18
ENSRNOG00000017193	Lingo1	-2.83376	4.24436e-37	-1.67694	1.95371e-13	0.276941	0.313293	-0.746962	0.00238573
ENSRNOG00000016189	Frmd5	-1.68896	4.80053e-37	-1.12808	3.22764e-16	-1.93724	1.11356e-47	-1.29075	2.00514e-20
ENSRNOG00000011011	Nmb	4.93287	5.64586e-37	2.32019	1.47916e-16	4.52013	1.16254e-27	3.96433	4.59154e-25
ENSRNOG00000043377	Fdps	-0.952315	6.50181e-37	-0.517398	4.75524e-11	-1.36943	1.08884e-74	-0.537446	2.03925e-11
ENSRNOG00000026036	Pdyn	-3.89703	8.02482e-37	-5.65111	9.71282e-78	-3.44046	3.84191e-28	-6.96584	1.31045e-118
ENSRNOG00000012273	Dmtn	-1.27287	9.02216e-37	-0.483638	5.90206e-06	0.518628	1.21874e-06	-0.930864	1.09196e-19
ENSRNOG00000012325	Adk	1.17327	1.02814e-36	1.19753	6.11999e-37	0.550909	7.72828e-09	1.03485	1.26613e-26
ENSRNOG00000010960	Ankh	-0.818956	1.05377e-36	-0.657782	4.51114e-23	-1.24343	6.17111e-82	-0.701146	6.74136e-25
ENSRNOG00000024452	Carmil2	-1.39676	1.14722e-36	-1.05755	1.11966e-20	-0.238017	0.0747852	-1.03451	3.91176e-19
ENSRNOG00000020480	Fads1	-0.81168	1.28522e-36	-0.690942	2.70545e-26	-0.352894	1.81183e-07	-0.544604	3.38754e-16
ENSRNOG00000005943	Sp8	6.33293	1.41998e-36	5.10521	1.3405e-30	4.38228	3.59985e-24	4.04895	1.38254e-21
ENSRNOG00000012940	Vps41	-1.02336	1.484e-36	-0.81639	3.71423e-23	-0.556616	3.50315e-11	-0.565875	3.08674e-11
ENSRNOG00000007014	Cnksr2	-1.89328	1.57002e-36	-1.98258	7.39432e-40	2.59296	4.50802e-56	-1.67249	1.89748e-28
ENSRNOG00000008937	Csrp1	-1.10481	1.58693e-36	-0.735002	2.8692e-16	-2.01051	5.34703e-120	-0.910796	3.11439e-24
ENSRNOG00000011044	Clmn	-1.70746	1.61175e-36	-2.39642	1.84454e-71	-1.77425	5.80012e-39	-1.80491	6.95823e-40
ENSRNOG00000014806	Pnkd	-0.812752	1.80069e-36	-0.703224	1.03172e-26	-1.07415	1.55803e-61	-0.0326333	0.749693
ENSRNOG00000012424	Adam23	-1.15063	1.83433e-36	-0.821974	1.68005e-18	-1.35806	8.53815e-50	-0.841796	7.14256e-19
ENSRNOG00000010601	Srpk2	-0.805669	2.26696e-36	-0.41041	9.35938e-10	-0.459305	5.79166e-12	-0.802462	1.20227e-34
ENSRNOG00000005196	Slc12a6	-0.782269	2.62401e-36	-0.471771	2.62168e-13	-0.242783	0.000364682	-0.159863	0.0313333
ENSRNOG00000015268	Plpp6	-1.27776	2.71207e-36	-1.65338	2.57021e-60	-0.227864	0.0796548	-0.627301	6.68481e-08
ENSRNOG00000055721	Rnf128	1.58219	2.78864e-36	0.36089	0.00568763	0.830741	9.17411e-11	1.53022	1.34613e-28
ENSRNOG00000024832	Gpr158	-1.49574	3.02808e-36	-0.489207	0.000140841	0.957173	3.44377e-14	-1.28437	1.5786e-26
ENSRNOG00000008747	Plekha5	1.14588	3.23304e-36	1.30103	1.63696e-45	2.27167	3.76003e-125	0.397994	4.22825e-05
ENSRNOG00000031849	Armh4	1.35416	3.35317e-36	1.79405	1.85062e-57	0.458968	4.03796e-05	2.30721	7.33987e-77
ENSRNOG00000012311	Slc35d3	2.60467	3.68929e-36	2.8641	3.37077e-40	1.99282	2.6931e-21	-0.175589	0.496705
ENSRNOG00000011677	Slc39a10	-1.63855	3.98055e-36	-0.68552	6.04341e-07	0.0884339	0.612596	-0.801153	4.24051e-09
ENSRNOG00000006545	Sept7	-1.08254	3.98371e-36	-0.740274	3.67133e-17	-0.801625	3.62721e-20	-0.701683	2.24607e-15
ENSRNOG00000017243	Bnip3	-1.15625	4.05065e-36	-0.759208	1.70681e-15	-1.48448	2.73115e-58	-0.861353	3.45485e-19
ENSRNOG00000010389	Ndrg2	-1.4663	5.27877e-36	-1.08024	8.02352e-20	-1.49277	1.65365e-37	-0.956548	1.0645e-15
ENSRNOG00000013039	Add1	-0.590859	5.33043e-36	-0.486124	3.93429e-24	-0.334654	8.79719e-12	-0.867947	6.28621e-75
ENSRNOG00000047734	Chst2	-1.26106	5.34284e-36	-1.19973	7.2765e-32	-1.5737	1.65446e-54	-1.75747	9.99057e-68
ENSRNOG00000028991	AC125757.1	2.41698	5.4163e-36	2.58518	1.22866e-38	3.51222	5.37547e-54	3.55239	6.37007e-53
ENSRNOG00000052157	Nav3	-1.25852	5.48422e-36	-0.279902	0.0141971	1.35211	1.41232e-35	0.217954	0.0727401
ENSRNOG00000004899	Kcns3	-4.11517	6.13422e-36	-3.80878	3.91702e-30	-4.99106	5.8892e-53	-1.3352	0.00190879
ENSRNOG00000001911	Map6d1	-1.44295	7.76853e-36	-0.780035	1.97588e-10	-1.86342	1.63988e-58	-0.838301	2.20087e-11
ENSRNOG00000011951	Plk2	-1.69876	8.83438e-36	-1.36766	3.22937e-23	2.09695	3.44419e-42	-2.40106	1.38646e-70
ENSRNOG00000016460	Clu	-1.11964	9.31251e-36	-1.25902	7.31226e-45	-1.76534	4.4371e-88	-0.87636	5.73097e-22
ENSRNOG00000019645	Osbp2	-1.16819	9.74767e-36	-0.582776	3.29497e-09	0.27842	0.0104332	-0.912103	4.40283e-21
ENSRNOG00000015655	Ptgfrn	-2.00051	1.01534e-35	0.191063	0.372476	-0.213967	0.279452	-0.92558	4.78472e-08
ENSRNOG00000006509	Srgap3	-0.741382	1.08374e-35	-1.03304	2.81955e-68	0.135052	0.0522406	-0.229711	0.000548526
ENSRNOG00000006867	Etv1	1.01202	1.33706e-35	0.779534	2.67873e-21	1.42126	5.02439e-66	1.28983	2.6417e-54
ENSRNOG00000018382	Inpp4b	2.58294	1.52934e-35	1.51913	1.02415e-13	1.8839	2.52596e-19	1.62527	1.16611e-14
ENSRNOG00000046984	St6galnac6	-0.965575	1.60948e-35	-0.887948	2.87315e-29	0.114835	0.261855	-0.70909	8.75515e-18
ENSRNOG00000000536	Mdga1	1.86396	1.84182e-35	1.06016	1.65343e-12	3.05338	1.04936e-65	2.25742	1.40389e-42
ENSRNOG00000057096	Gnai1	0.825611	1.99184e-35	0.844103	7.20841e-36	0.25639	0.000274351	1.39164	6.56281e-84
ENSRNOG00000024245	Zkscan2	2.03095	2.18327e-35	1.53608	6.68364e-21	2.37564	1.22057e-40	1.10071	5.24743e-11
ENSRNOG00000016221	Scn2b	-1.32382	2.23622e-35	-1.42028	3.73163e-40	0.337841	0.00748439	-1.78809	6.54041e-63
ENSRNOG00000010793	Spryd3	-0.978075	2.62289e-35	-0.796295	4.37184e-23	-0.337898	8.45885e-05	-0.392238	6.36484e-06
ENSRNOG00000033894	AABR07024769.1	-1.86261	2.73921e-35	-1.5646	3.60574e-24	-0.348962	0.0662016	-0.598953	0.000920419
ENSRNOG00000008810	Nsmf	-1.30588	3.05706e-35	-2.19904	1.36486e-98	0.745445	1.09653e-11	-0.837322	9.46383e-15
ENSRNOG00000031789	Rangap1	-0.896677	3.07104e-35	-1.08144	2.05876e-50	-0.478595	4.58985e-10	-1.11499	4.91673e-52
ENSRNOG00000010079	Car3	4.52927	3.23309e-35	3.9183	5.19268e-28	2.98406	5.02257e-18	4.60396	2.44978e-29
ENSRNOG00000032546	Dot1l	0.954718	3.42668e-35	1.14874	2.7817e-48	1.47716	2.42548e-72	0.859597	1.28387e-26
ENSRNOG00000009276	Schip1	-0.960262	3.49786e-35	-1.41265	1.91644e-75	-1.35004	1.27331e-67	-0.44978	1.44253e-07
ENSRNOG00000015396	Sptan1	-0.536564	3.74131e-35	-0.485758	9.7715e-29	0.320065	6.18739e-13	-0.518506	1.74792e-32
ENSRNOG00000007304	Herc3	-1.36789	4.70936e-35	-0.968741	9.87754e-18	-0.400913	0.000795732	-0.28666	0.0257686
ENSRNOG00000006984	Mapk11	-1.99766	5.16264e-35	-0.815608	2.51408e-06	-0.0224143	0.930875	-1.05449	7.29327e-10
ENSRNOG00000043210	Ppp3r1	-1.27942	5.30903e-35	-1.59524	7.32022e-54	0.0103601	0.949603	-1.60451	2.51927e-54
ENSRNOG00000005509	Pak7	-1.43555	5.43744e-35	-0.38198	0.00361726	-0.427723	0.000856205	-0.234	0.106641
ENSRNOG00000000775	Mog	-2.07141	6.52773e-35	-1.81068	1.40201e-26	-4.09692	4.86709e-136	-2.07425	1.44969e-34
ENSRNOG00000016516	Mbp	-2.04625	6.61041e-35	-1.67807	1.17502e-23	-4.97841	7.43798e-204	-2.09892	1.2275e-36
ENSRNOG00000002753	Adam11	-1.58999	8.58148e-35	-1.58963	1.29775e-34	-0.169036	0.282654	-0.469036	0.000929162
ENSRNOG00000005345	Vsnl1	-3.00097	9.20314e-35	-2.02488	3.29613e-16	-2.07429	3.08235e-17	-0.421995	0.152306
ENSRNOG00000033618	Col28a1	3.6269	9.67053e-35	5.07894	9.45836e-44	4.70423	3.30365e-36	4.21254	9.40902e-33
ENSRNOG00000009783	Camk2g	-1.16856	9.75083e-35	-0.216925	0.0522312	-0.973996	4.60585e-24	0.646233	6.12327e-10
ENSRNOG00000012481	Ppm1j	3.89457	1.007e-34	2.90102	2.70245e-22	2.78841	1.14165e-19	4.30241	7.36095e-30
ENSRNOG00000008237	Unc13b	-1.50957	1.04498e-34	-1.01266	9.91728e-16	0.156976	0.316265	0.361811	0.0136859
ENSRNOG00000015385	Pink1	-0.913316	1.10595e-34	-0.525198	1.18118e-11	-1.20133	1.27325e-58	-0.31793	0.000123887
ENSRNOG00000024990	Ppp1r1c	5.03355	1.12876e-34	4.38286	1.53436e-30	3.82638	5.83867e-24	4.85549	2.32142e-25
ENSRNOG00000001070	Cdk2ap1	-1.43131	1.13772e-34	-0.178171	0.232351	-1.44392	1.00503e-34	-0.429803	0.0011476
ENSRNOG00000013389	Rgs7bp	-1.30099	1.43773e-34	-0.959876	2.27222e-18	0.933321	1.42456e-12	-2.06671	1.65472e-85
ENSRNOG00000027940	Plppr3	1.68228	1.44377e-34	1.69761	1.52197e-33	1.24869	9.85078e-19	0.468581	0.00135446
ENSRNOG00000018700	Mobp	-2.01007	1.53029e-34	-1.75292	2.43862e-26	-3.92521	2.74848e-130	-2.1363	8.01198e-39
ENSRNOG00000019869	Lrfn1	-1.67369	1.53029e-34	-1.29458	7.25618e-20	-0.172768	0.37321	0.119352	0.601702
ENSRNOG00000000781	Rnf39	-3.97572	1.59037e-34	-4.02732	3.62542e-35	1.01321	0.034246	-2.27244	6.06576e-11
ENSRNOG00000031816	Nckipsd	-1.09523	1.97506e-34	-1.23345	1.18845e-42	-1.71877	7.61038e-83	-0.686714	5.14338e-12
ENSRNOG00000032136	Cdc42ep3	1.60241	2.2027e-34	1.39749	7.92098e-26	2.13704	6.77085e-43	0.309252	0.0311244
ENSRNOG00000014478	Fndc3a	0.923014	2.65719e-34	0.895459	3.89818e-31	0.649725	1.43896e-16	0.611329	2.09142e-14
ENSRNOG00000007859	Cep83	-1.0205	2.80216e-34	-0.292142	0.00182334	-0.600161	7.53834e-12	-0.363802	0.000104193
ENSRNOG00000016724	Epb41l3	1.01867	3.6143e-34	1.6596	5.49098e-87	0.52163	9.91467e-10	1.84204	6.03622e-104
ENSRNOG00000054458	Kcnmb4	-1.85627	5.00548e-34	-1.53627	1.03159e-22	2.00817	1.98566e-17	-1.39941	4.76236e-18
ENSRNOG00000005715	Lgr4	1.05768	5.90935e-34	0.838058	2.41126e-21	0.860373	9.86114e-22	0.988707	2.64243e-27
ENSRNOG00000007234	Cyp51	-1.08354	6.20755e-34	-1.05233	1.13813e-31	-3.12832	1.84097e-283	-0.813607	8.62012e-19
ENSRNOG00000016102	Ebf3	4.3652	6.46598e-34	4.69542	1.9502e-31	-2.50133	5.30803e-32	5.20806	2.69559e-25
ENSRNOG00000015105	Bspry	-2.07309	6.50501e-34	-2.57157	3.91001e-52	-3.37386	2.55239e-91	-1.6924	1.92179e-20
ENSRNOG00000023633	Crabp1	4.39377	7.37696e-34	3.59544	5.59402e-28	1.95736	1.80526e-12	0.507753	0.067735
ENSRNOG00000012524	Zfp91	-0.753808	7.50383e-34	-0.391272	1.68529e-09	-0.597041	4.78888e-21	-0.172889	0.0165272
ENSRNOG00000029342	Scn7a	6.36761	7.94847e-34	3.99083	1.19291e-19	1.0081	0.0209229	4.14675	4.08773e-19
ENSRNOG00000014571	Dbndd2	-0.902002	7.94847e-34	-0.433662	8.01564e-08	-2.46547	5.67642e-263	-0.955924	1.69193e-34
ENSRNOG00000012037	Galnt7	1.29573	7.98721e-34	1.08467	1.53583e-23	0.535248	1.23178e-06	1.5741	5.2969e-40
ENSRNOG00000009882	Ppp3ca	-1.82809	1.01047e-33	-2.00073	3.86613e-40	0.292876	0.0890712	-2.45802	2.70326e-60
ENSRNOG00000008951	Rasl10a	-3.85591	1.09527e-33	-3.3835	9.59205e-26	0.359664	0.450017	-1.60033	6.34065e-06
ENSRNOG00000011624	Kcnq2	-1.07243	1.20729e-33	-1.46133	1.07969e-61	0.846928	6.1848e-19	-1.61306	1.32484e-74
ENSRNOG00000018226	Zcchc14	1.15828	1.32027e-33	0.785165	6.78989e-16	2.23019	4.87231e-92	0.47264	3.42606e-06
ENSRNOG00000010822	Dlx6	3.01462	1.32837e-33	3.29893	2.21671e-34	5.76062	1.08901e-33	-0.282914	0.27322
ENSRNOG00000007604	Igsf8	-1.16595	1.34834e-33	-1.44859	3.66491e-51	-1.18861	1.78997e-33	-0.733494	1.76325e-12
ENSRNOG00000004013	Grip1	1.71255	1.36602e-33	0.757399	1.46477e-07	2.12825	3.59978e-44	0.422096	0.00611306
ENSRNOG00000014492	Pgc	7.22101	1.37818e-33	6.6064	8.52781e-31	7.0966	1.22672e-29	7.05359	7.3659e-29
ENSRNOG00000042536	Pde4d	1.1965	1.46205e-33	1.52587	1.68418e-51	2.5238	1.52387e-115	1.70105	4.09734e-59
ENSRNOG00000010038	Psmc5	-1.02412	1.56648e-33	-0.734196	4.51354e-17	-1.56035	2.28037e-76	-0.906112	5.4395e-25
ENSRNOG00000019575	Rell2	-1.34772	1.72715e-33	-0.719315	1.26347e-09	-1.0538	8.94756e-20	-0.0932668	0.579169
ENSRNOG00000010517	Fam126a	2.15089	1.75845e-33	1.10413	2.39943e-10	0.416987	0.0231546	1.68486	2.48155e-19
ENSRNOG00000057556	Pdzrn3	-1.88743	1.81961e-33	-0.330095	0.0798875	-0.827142	5.77527e-07	0.0145621	0.960857
ENSRNOG00000017766	Car12	-1.58669	1.92953e-33	-2.73719	4.37944e-100	0.194791	0.272284	-3.3345	6.71567e-149
ENSRNOG00000016878	Plppr5	1.0653	2.01978e-33	0.998321	9.26677e-29	1.90913	6.48464e-88	0.727954	2.47095e-15
ENSRNOG00000017932	St3gal2	-1.11136	2.27417e-33	-1.13191	5.60554e-34	-0.183462	0.101595	-1.26372	2.86119e-41
ENSRNOG00000023786	Ybx1	1.05983	2.90038e-33	0.929925	2.35545e-25	0.705317	5.62039e-15	0.599598	7.16689e-11
ENSRNOG00000013781	Kcnq5	-1.40106	3.06862e-33	-0.939801	3.13635e-15	2.17118	3.02415e-64	-1.47417	2.44217e-36
ENSRNOG00000013368	Plcl2	-1.19793	3.09113e-33	-0.595045	1.91471e-08	0.283331	0.0176951	-1.37161	7.42089e-42
ENSRNOG00000016552	Hmgcs1	-1.12843	4.06524e-33	-1.04608	2.37209e-28	-2.86765	8.35232e-212	-0.770743	1.29011e-15
ENSRNOG00000021984	Rgs7	-1.30078	4.19886e-33	-0.654169	8.56313e-09	0.582979	9.50983e-07	-0.0973996	0.520734
ENSRNOG00000015962	Nmnat1	-1.1016	4.75984e-33	-0.553083	2.9949e-08	-2.5718	1.18094e-185	-0.528348	5.39075e-07
ENSRNOG00000029134	Adgrl1	-0.958278	5.27432e-33	-0.593143	4.92503e-13	1.01154	1.04266e-34	-0.793225	1.5024e-22
ENSRNOG00000030930	Samsn1	4.81507	6.11441e-33	4.10752	9.82626e-28	3.53161	2.42229e-21	4.86878	6.17421e-25
ENSRNOG00000019482	Gnao1	-0.841965	6.2517e-33	-0.676078	2.75211e-21	0.123527	0.136221	-1.11021	4.09015e-56
ENSRNOG00000013555	Ankrd55	1.879	7.67893e-33	1.47666	4.59862e-21	0.692616	9.3402e-06	1.70334	1.23899e-22
ENSRNOG00000001647	Ets2	-1.61271	8.46042e-33	-1.85787	5.67321e-43	-0.529355	0.000573283	-2.32576	7.96736e-67
ENSRNOG00000018985	Grk2	-1.50174	8.46042e-33	-1.02563	1.46179e-15	-0.402233	0.00323979	-0.378239	0.00762954
ENSRNOG00000005569	Phospho1	-2.14087	8.75572e-33	-0.539526	0.0111386	-1.19486	5.02045e-10	0.152805	0.5973
ENSRNOG00000004544	Ube2e3	1.04346	8.81581e-33	0.631242	1.39634e-12	0.54741	1.42411e-09	0.803022	2.30375e-18
ENSRNOG00000013017	Arnt2	-1.52687	9.43604e-33	-0.794159	2.20023e-09	-0.641308	1.45897e-06	-1.18676	7.20076e-20
ENSRNOG00000009143	Lrrc57	-1.80772	9.63995e-33	-0.850697	2.95434e-07	-0.479259	0.00848155	-0.0879303	0.732198
ENSRNOG00000005634	AABR07047872.1	-2.1253	1.10046e-32	-1.08668	1.55904e-08	-0.292435	0.215557	-0.46878	0.0393864
ENSRNOG00000022472	Snap47	-1.5202	1.55021e-32	-1.21579	5.92711e-20	-0.643955	1.15006e-05	-0.80254	4.05545e-08
ENSRNOG00000007769	March2	-1.01709	2.07453e-32	-0.477147	3.25959e-07	-1.55891	5.91678e-74	-0.549067	1.15599e-08
ENSRNOG00000010626	Sphk1	3.77744	2.09651e-32	5.11639	2.10599e-36	2.9566	1.30465e-20	5.76188	5.37673e-30
ENSRNOG00000049768	Adcy9	-1.42835	2.29135e-32	-1.29272	2.76106e-26	0.504899	0.000191536	-0.94924	3.68847e-14
ENSRNOG00000053945	Daam2	-1.29332	2.62272e-32	-1.44027	1.74185e-39	-1.72357	2.45175e-56	-0.993261	2.97083e-18
ENSRNOG00000053272	Chi3l1	-1.02688	2.97955e-32	-1.16078	2.16411e-40	-0.989248	1.67545e-28	-1.1701	1.81427e-39
ENSRNOG00000056457	Gpd1	-1.60999	3.18354e-32	-1.61689	3.48525e-32	-2.92793	4.9006e-106	-1.46877	2.99926e-26
ENSRNOG00000000551	Fam241b	-1.83152	3.28171e-32	-0.453116	0.0149078	-0.154649	0.489862	-0.728124	5.49635e-05
ENSRNOG00000017297	Cab39	-0.665128	3.32048e-32	-0.560235	1.92297e-22	-0.698808	4.18407e-34	-0.500324	2.84511e-17
ENSRNOG00000004063	Sh3pxd2b	1.47174	3.80652e-32	1.82296	7.55273e-43	0.833468	8.05731e-11	1.9087	5.02982e-39
ENSRNOG00000009033	Cntn2	-1.35248	4.12198e-32	-1.05115	2.04405e-19	-2.37184	6.75221e-98	-1.17802	6.08105e-24
ENSRNOG00000036859	Gdpd5	1.17797	4.77618e-32	2.01433	4.60022e-79	1.4726	1.9662e-43	0.356166	0.00104734
ENSRNOG00000019804	B3gat3	-1.07555	5.38813e-32	-0.632805	3.34344e-11	-0.286771	0.00542462	-0.192046	0.0909631
ENSRNOG00000016071	P3h3	0.890421	7.61713e-32	0.559999	4.5284e-13	1.16387	4.91715e-47	0.563183	2.02547e-12
ENSRNOG00000006004	Phc2	0.789816	7.90472e-32	0.815992	2.65498e-32	0.427632	1.37567e-09	0.654479	1.0599e-19
ENSRNOG00000001115	Slc29a4	1.81698	9.19687e-32	0.424029	0.00515626	-0.0971629	0.586192	1.16182	1.0585e-12
ENSRNOG00000018873	Fam168a	-0.7614	9.96329e-32	-0.639188	2.97922e-22	-0.849009	9.01286e-39	-0.560056	6.49351e-17
ENSRNOG00000027234	Zfp367	-1.68754	1.00839e-31	-0.967186	4.10279e-10	-1.745	2.53678e-32	-0.585361	0.000795962
ENSRNOG00000016897	Rlbp1	1.22074	1.14598e-31	1.2241	2.01772e-30	-0.0445166	0.750376	0.923179	6.01079e-17
ENSRNOG00000021145	Gpr137	-1.17495	1.18448e-31	-0.688599	6.76925e-11	-1.12939	3.47915e-28	-0.558298	4.7161e-07
ENSRNOG00000059793	Rab37	3.56069	1.24987e-31	2.77597	5.31146e-22	-1.61118	1.49711e-11	5.1151	1.9227e-28
ENSRNOG00000033389	Susd2	-2.28299	1.26919e-31	-1.88784	3.51141e-21	-3.55804	4.44543e-77	0.077986	0.823657
ENSRNOG00000051621	Catsperz	-3.2064	1.37664e-31	-1.55483	7.48482e-08	0.230465	0.546293	-0.934	0.00270557
ENSRNOG00000010789	Dusp7	-1.27658	1.44671e-31	-0.674784	3.51041e-09	0.0212506	0.900794	-0.337283	0.00704698
ENSRNOG00000008943	Penk	2.05936	1.48632e-31	3.00484	1.67212e-62	0.853312	2.36743e-06	-2.54727	1.11242e-49
ENSRNOG00000006670	Rai2	2.08221	1.58615e-31	1.93646	1.20707e-26	1.57016	8.56712e-18	1.74226	1.98142e-20
ENSRNOG00000026236	Morc3	0.898979	1.68912e-31	0.722977	2.94833e-20	1.338	7.04356e-57	0.60881	9.03836e-14
ENSRNOG00000026745	Acsl6	-0.725845	1.77839e-31	-0.414215	1.18283e-10	-0.462252	3.70559e-13	-0.301786	5.91462e-06
ENSRNOG00000025518	Carmil3	1.78863	1.85391e-31	0.917679	4.84129e-09	1.62705	1.36894e-25	1.72518	5.63155e-28
ENSRNOG00000021234	Slc4a11	-2.55465	1.91461e-31	-1.51702	1.00684e-10	0.491259	0.136781	-4.26626	1.66035e-88
ENSRNOG00000051615	Hmgn2	1.44251	2.55456e-31	0.776461	8.02459e-10	0.559975	1.21672e-05	0.0522889	0.774293
ENSRNOG00000011931	Smarca2	-1.12747	2.59705e-31	-0.839974	1.81106e-17	-0.696469	2.553e-12	-1.11802	3.84562e-30
ENSRNOG00000030954	Fat1	0.951895	3.24845e-31	1.09774	1.52276e-40	0.5109	1.04918e-09	0.696444	9.93068e-17
ENSRNOG00000011521	Filip1	1.25236	3.40643e-31	-0.0210868	0.899829	0.667877	2.47892e-09	-0.824045	1.91032e-16
ENSRNOG00000001225	Fam207a	1.50166	3.91942e-31	1.51155	3.85624e-30	1.61082	2.22587e-31	1.50835	2.29502e-27
ENSRNOG00000030775	Adarb2	2.3173	4.13657e-31	1.79911	2.53251e-19	2.05125	1.8579e-23	2.40453	1.29649e-29
ENSRNOG00000022929	Mtmr12	-1.21808	4.13791e-31	-1.6135	4.86547e-54	0.378571	0.0038279	-1.06707	4.21215e-22
ENSRNOG00000001750	Chrd	-2.0245	4.175e-31	-3.10943	4.38336e-74	-0.111888	0.681107	1.0702	2.94492e-05
ENSRNOG00000015445	Mal	-2.22166	5.01833e-31	-2.10275	9.90904e-28	-3.39397	8.15089e-72	-2.38392	1.84543e-35
ENSRNOG00000036839	Hnrnpa1	0.778398	5.53081e-31	0.408608	3.87016e-09	0.646181	3.01992e-21	0.470344	1.54668e-11
ENSRNOG00000052899	AABR07049886.2	-3.12737	5.70684e-31	-4.64999	1.44727e-70	1.28024	0.0128298	-4.35978	1.81617e-60
ENSRNOG00000028187	Sp9	3.87951	6.23304e-31	4.13273	8.52198e-31	6.07893	2.89613e-31	1.0295	0.00101175
ENSRNOG00000011140	Prxl2a	-1.00796	6.64727e-31	-1.49709	6.70299e-68	-1.97867	4.83887e-119	-1.13138	8.32724e-36
ENSRNOG00000003905	Nsf	-0.745291	6.79552e-31	-0.820343	4.56099e-37	-0.357864	7.35449e-08	-0.662435	2.98289e-24
ENSRNOG00000012362	Cacng3	-1.62252	6.90721e-31	-0.980743	1.39323e-11	1.42414	1.50634e-19	-1.33145	1.52907e-20
ENSRNOG00000015257	Coro2b	-1.08464	7.2296e-31	-0.695322	9.20616e-13	-0.648641	3.89917e-11	-1.1526	1.70068e-33
ENSRNOG00000047003	AABR07066693.1	-1.66038	7.28269e-31	-1.29427	8.69959e-18	-2.30766	1.63456e-58	-0.582067	0.00130621
ENSRNOG00000014375	Adgrb2	-0.90331	7.38583e-31	-1.20238	6.71424e-54	1.08256	2.63289e-39	-0.914022	5.79472e-31
ENSRNOG00000008620	Smad3	-1.32311	7.84846e-31	-2.03209	6.56602e-73	-0.496079	0.000138357	-2.54022	1.14082e-113
ENSRNOG00000009552	Serinc3	-0.656319	8.83306e-31	-0.503713	4.68563e-18	-0.44248	5.08826e-14	-0.463946	5.54931e-15
ENSRNOG00000049361	Gas7	-1.21039	9.93868e-31	-0.8999	3.4439e-17	1.72587	2.40783e-54	-1.3594	3.24345e-38
ENSRNOG00000045637	Rnf14	-0.669652	1.07207e-30	-0.696014	9.91903e-33	-0.355392	3.78842e-09	-0.325994	1.33423e-07
ENSRNOG00000010519	Cyp39a1	4.78302	1.12924e-30	4.67633	2.41946e-28	4.77314	1.8732e-26	5.15527	3.24586e-27
ENSRNOG00000030294	Eml4	0.789332	1.23006e-30	0.605242	4.71449e-18	1.17972	2.84015e-58	0.686495	2.28261e-21
ENSRNOG00000029165	Stx1a	-3.51652	1.29009e-30	-1.8847	2.48069e-09	0.950645	0.00512635	-1.29772	7.52802e-05
ENSRNOG00000000275	Fam13c	-1.12845	1.31922e-30	-1.3881	1.54077e-45	-0.398197	0.000581537	-0.572895	4.71023e-07
ENSRNOG00000047635	Tmem178b	-1.56324	1.31922e-30	-1.17248	2.00514e-17	-1.29793	2.15372e-21	-0.852801	1.62298e-09
ENSRNOG00000024022	Ndfip2	-0.865567	1.40944e-30	-0.589888	4.46771e-14	-1.00533	1.34919e-39	-0.982771	3.32935e-37
ENSRNOG00000008423	Gpr22	-1.9231	1.41775e-30	-3.2838	6.71741e-89	-0.727167	6.81235e-05	-1.03247	9.27565e-09
ENSRNOG00000021691	Ccdc92	-1.4051	1.41775e-30	-0.840197	4.03222e-11	-1.68269	3.6528e-43	-0.725313	3.12728e-08
ENSRNOG00000018212	Abhd17a	-1.27611	1.41775e-30	-0.74583	1.63491e-10	-0.886939	1.92936e-14	-1.03417	4.52876e-19
ENSRNOG00000021130	Abcc8	-1.46986	1.48944e-30	-1.20865	2.19452e-20	-0.00407609	0.987986	-0.558178	0.000103695
ENSRNOG00000052256	Dact3	-1.40813	1.74973e-30	-0.941117	8.10748e-14	-0.634188	8.59007e-07	-0.663047	4.11132e-07
ENSRNOG00000033528	Tll1	2.55225	2.41193e-30	1.07574	2.37839e-07	2.58959	2.95681e-25	0.942847	1.60118e-05
ENSRNOG00000014096	Nr3c1	-0.857137	2.45606e-30	-0.633532	1.9131e-16	-0.877738	8.77938e-31	-0.861518	3.77656e-29
ENSRNOG00000015473	Phactr2	2.59639	2.49541e-30	1.6543	2.4491e-13	1.24374	4.17288e-08	3.57766	9.68616e-43
ENSRNOG00000017512	Aldh3b1	-2.65112	2.74276e-30	-2.58599	3.94776e-28	-0.673012	0.0249905	-2.56571	1.30756e-26
ENSRNOG00000024492	Ap1ar	-1.19729	2.8281e-30	-0.882355	4.4175e-16	0.0821347	0.589902	-0.902578	5.38383e-16
ENSRNOG00000023993	Kif1a	-1.21752	2.84588e-30	-0.699284	1.64403e-10	-0.589395	6.61859e-08	-0.51063	5.36929e-06
ENSRNOG00000004973	Ppp2r5c	-0.800678	3.06656e-30	-0.566615	2.93103e-15	-0.176438	0.0255344	-0.647659	2.38597e-19
ENSRNOG00000020519	Olfm2	-3.16775	3.91983e-30	-1.55748	8.20805e-08	-1.51938	1.27e-07	-0.830376	0.00818669
ENSRNOG00000014029	Klhl13	1.17597	4.0062e-30	0.742376	1.44872e-12	0.458272	1.93386e-05	-1.63743	4.80437e-63
ENSRNOG00000018254	Sncaip	1.81173	4.0136e-30	1.15557	1.86752e-13	1.2957	2.93581e-15	0.781348	1.95578e-06
ENSRNOG00000006410	Akap5	-1.22365	4.16708e-30	-0.94537	7.2034e-18	2.53529	1.84469e-68	-2.67723	3.61568e-143
ENSRNOG00000010085	Cldn10	-1.63571	4.70686e-30	-1.74071	2.99632e-33	-1.84347	2.37529e-36	-1.67046	7.77848e-29
ENSRNOG00000022711	Slco4c1	-2.98835	5.84991e-30	-3.04171	1.84632e-30	-0.964485	0.00384532	-3.67379	2.28123e-44
ENSRNOG00000039862	Cldn12	1.07666	5.86392e-30	0.989786	8.81852e-25	0.858659	1.76735e-18	0.264392	0.0125626
ENSRNOG00000009298	Fbxo44	-0.937072	6.5837e-30	-0.797436	3.93397e-21	-0.558804	2.18341e-10	-0.601366	1.49659e-11
ENSRNOG00000036869	Tmem88b	-1.66686	6.79748e-30	-1.58202	2.46725e-26	-3.75739	2.39578e-155	-1.79338	5.65157e-33
ENSRNOG00000010997	Ednrb	1.25604	7.74154e-30	1.20172	7.14033e-27	-0.548854	9.18802e-07	0.9557	5.1195e-17
ENSRNOG00000019262	Trak1	-1.03197	8.6641e-30	-0.653444	3.12308e-12	-0.0300883	0.820909	-0.284969	0.00555696
ENSRNOG00000001376	Mettl7a	-1.01389	8.77244e-30	-0.89222	4.23266e-22	-1.56155	3.44337e-68	-0.830766	1.38793e-17
ENSRNOG00000004713	Kcnj16	2.45783	8.82065e-30	2.02909	1.23614e-20	-0.985405	3.37754e-06	3.89696	7.6116e-51
ENSRNOG00000008078	Kcnh6	3.19422	9.50056e-30	2.84674	8.51886e-24	3.04108	6.30058e-25	3.17856	9.2536e-26
ENSRNOG00000038909	Pou3f3	-1.52363	1.00605e-29	-1.30911	1.00416e-21	-0.942734	1.58764e-11	-1.30561	3.54069e-21
ENSRNOG00000042607	Rhof	-1.79631	1.08861e-29	-1.77896	1.81446e-28	-1.36501	2.78161e-16	-0.531	0.00650542
ENSRNOG00000009863	Prrt3	-1.482	1.13101e-29	-1.19582	5.32848e-19	-0.195794	0.244178	-0.418273	0.0070971
ENSRNOG00000000552	Col13a1	-3.22699	1.27037e-29	1.66085	7.24563e-06	0.952697	0.0105074	1.19415	0.00215926
ENSRNOG00000003365	Cadm3	-1.05247	1.40216e-29	-0.790929	6.49527e-17	-0.0320677	0.81001	0.0627036	0.636207
ENSRNOG00000031801	Ephb3	-2.10765	1.41572e-29	-0.680797	0.00120284	0.834472	0.000331131	0.0235817	0.946597
ENSRNOG00000013072	Plxna4	-1.36718	1.42861e-29	-2.22131	2.57461e-77	0.420523	0.00240821	-0.495025	0.000230651
ENSRNOG00000000886	Caln1	-2.86203	1.43211e-29	-3.04305	4.01474e-33	-1.51134	1.79978e-08	-3.97235	2.20714e-56
ENSRNOG00000024730	Ppm1e	2.16806	1.52596e-29	0.659895	0.00149394	3.08111	1.04529e-57	3.62989	1.02344e-77
ENSRNOG00000019577	Adamts19	3.29522	1.72838e-29	2.29617	3.00347e-16	2.92631	6.87645e-22	0.189566	0.595387
ENSRNOG00000028992	Acan	1.49667	1.86297e-29	1.93321	8.15723e-44	0.786813	7.04681e-09	2.8453	4.38294e-66
ENSRNOG00000053804	Prmt8	-1.89244	2.07261e-29	-1.69285	2.48518e-23	0.651454	0.000948936	-1.70237	2.99082e-23
ENSRNOG00000024825	Fam163a	-2.00396	2.09391e-29	-1.94306	2.6011e-27	0.335684	0.140557	-1.78605	1.06764e-22
ENSRNOG00000007374	Tac1	2.38128	2.73581e-29	2.00506	1.42988e-21	-0.569086	0.00200522	-3.8221	3.88782e-127
ENSRNOG00000006003	Ctnna2	-1.06815	2.83104e-29	-0.840153	9.96271e-18	-0.619707	1.08512e-09	-1.16241	1.24115e-32
ENSRNOG00000012337	Pde1c	2.29343	3.41181e-29	1.87384	4.45025e-20	-0.259021	0.23647	0.835565	5.804e-05
ENSRNOG00000005673	Runx1t1	1.20983	3.59539e-29	0.746389	1.13366e-11	2.39466	4.28636e-89	-0.359854	0.00179979
ENSRNOG00000027264	Dagla	-1.34877	3.74755e-29	-1.84752	5.51405e-54	0.328327	0.0160877	-0.755709	2.08465e-09
ENSRNOG00000005776	Bcl11b	1.74201	3.86055e-29	-0.455052	0.00674342	4.01862	8.56355e-108	-1.53587	7.2861e-24
ENSRNOG00000008098	Lrrc4	-0.99154	3.93777e-29	-0.600609	6.53656e-11	0.635895	6.50569e-11	-0.109116	0.357101
ENSRNOG00000000368	Grik2	1.09272	4.22294e-29	0.00700796	0.968163	1.07214	1.56265e-26	-0.620643	2.47737e-10
ENSRNOG00000006911	Sptb	-1.04052	4.44138e-29	-0.986089	6.11472e-26	0.150452	0.176159	-0.748751	4.52251e-15
ENSRNOG00000000520	Srsf3	0.716185	5.05537e-29	0.363734	4.07234e-08	0.483123	3.98885e-13	0.261532	0.00018754
ENSRNOG00000010784	Scg3	-1.02814	5.80511e-29	-0.890226	9.49698e-22	-0.322029	0.00104568	-0.60981	1.51351e-10
ENSRNOG00000018020	Apbb1	-0.739944	6.67532e-29	-0.828977	1.24842e-35	-1.42272	8.31396e-105	-0.35296	8.30579e-07
ENSRNOG00000017974	Gprin1	1.15669	6.84549e-29	0.523182	1.23221e-06	3.67173	1.80766e-192	2.0229	8.70072e-77
ENSRNOG00000060825	Ccm2	-1.32792	6.88069e-29	-1.04556	2.00311e-17	-0.648599	7.44649e-07	-1.7272	1.03171e-46
ENSRNOG00000011704	Fbxo34	-1.25807	6.98269e-29	-0.41383	0.00091391	0.702992	3.15268e-08	-0.921621	4.11217e-15
ENSRNOG00000006472	Hspa2	1.20942	8.71058e-29	0.580673	1.08167e-07	-2.31591	1.70091e-138	1.82163	1.43607e-42
ENSRNOG00000006931	Eepd1	1.42224	9.16537e-29	1.13269	2.0161e-18	1.41372	1.52696e-25	1.38088	7.54268e-24
ENSRNOG00000024657	Mfsd4a	-3.26966	9.42782e-29	-2.72879	4.76129e-20	-0.616918	0.0739916	-0.467517	0.217679
ENSRNOG00000007645	Kcnj9	-2.65286	9.9849e-29	-1.80221	1.5412e-13	0.532499	0.0584912	-0.0474261	0.90457
ENSRNOG00000011156	Clstn3	-0.950133	1.07631e-28	-0.652057	8.83582e-14	-0.349592	0.000112551	-0.510712	1.20007e-08
ENSRNOG00000053201	Gpcpd1	-0.878193	1.08293e-28	-0.426412	3.3278e-07	0.0656945	0.535601	-0.514531	7.65603e-10
ENSRNOG00000015397	Cpne7	1.90168	1.10622e-28	-1.16344	2.29762e-12	3.55212	2.61776e-66	1.61773	8.26535e-20
ENSRNOG00000012406	Pcbp4	-0.980005	1.7667e-28	-0.727662	1.43774e-15	-1.27537	7.21989e-47	-0.515158	8.28546e-08
ENSRNOG00000016654	Galr1	5.76586	1.78756e-28	2.43291	1.09708e-13	0.138313	0.715135	4.61827	3.35288e-20
ENSRNOG00000020167	Reep5	-0.566241	1.81545e-28	-0.395401	6.36071e-14	-1.05359	1.0951e-95	-0.503173	2.02467e-21
ENSRNOG00000029841	Cdh19	2.3811	2.39007e-28	2.15198	5.06354e-23	1.37065	2.52956e-10	2.2782	6.06091e-24
ENSRNOG00000011700	Ptprm	1.19987	2.40703e-28	2.06779	1.12981e-77	1.1253	1.49235e-24	0.566498	6.60808e-07
ENSRNOG00000030719	Csmd1	-1.1677	2.45756e-28	-1.09922	8.17147e-25	1.06349	3.15115e-19	-1.03829	9.54636e-22
ENSRNOG00000010889	Fbxw7	-1.30353	2.51906e-28	-0.41783	0.00118681	0.864948	3.17333e-12	0.0725173	0.67052
ENSRNOG00000001796	Dgkg	1.55179	2.64024e-28	-0.907765	8.7133e-11	2.63235	2.24194e-67	1.70248	1.85974e-31
ENSRNOG00000006857	AABR07060833.1	3.16119	2.68303e-28	2.72968	2.62484e-21	2.40151	6.88488e-17	3.6038	3.24799e-33
ENSRNOG00000031671	Rasgef1a	-0.972393	2.74512e-28	-1.39325	2.95953e-57	1.87845	1.98472e-63	-1.72355	1.08565e-86
ENSRNOG00000016182	Tgfa	1.47155	2.85901e-28	1.19913	6.79168e-19	-1.65607	5.64638e-39	-0.26784	0.0772783
ENSRNOG00000019977	Ptprf	0.76039	2.8748e-28	0.849839	5.71816e-34	0.24351	0.000919347	0.553057	1.48198e-14
ENSRNOG00000020322	Asb1	-1.46573	2.92382e-28	-1.41182	1.8596e-25	-0.661679	1.05046e-05	-1.05805	2.42747e-13
ENSRNOG00000020518	Fam189b	-1.28543	2.95322e-28	-0.784823	1.29727e-10	-0.605523	1.41523e-06	-1.41621	7.32172e-33
ENSRNOG00000012568	Madd	-0.616536	3.15006e-28	-0.44672	8.09093e-15	0.903018	5.79303e-49	-0.345528	7.66996e-09
ENSRNOG00000017406	Atrnl1	-1.09239	3.2109e-28	0.264704	0.01958	1.69719	1.77507e-57	0.0755639	0.588188
ENSRNOG00000024435	Galnt17	-1.30065	3.25046e-28	-2.73647	2.14188e-128	-0.0844141	0.631867	-1.17411	3.67776e-21
ENSRNOG00000061230	L1cam	-0.996237	3.48959e-28	-1.02836	1.09263e-29	-0.389217	5.00677e-05	-1.37336	2.90555e-52
ENSRNOG00000001706	Kalrn	-0.906288	3.55201e-28	-0.790234	1.93201e-21	3.33663	1.38207e-269	-0.193288	0.0425075
ENSRNOG00000003689	Nono	0.674568	3.55201e-28	0.544445	2.58284e-18	0.639057	4.40908e-24	0.594757	1.31969e-20
ENSRNOG00000000503	Ppard	-1.32314	3.65525e-28	-0.27654	0.0601142	-0.585821	1.02667e-05	0.144871	0.415717
ENSRNOG00000010232	Enpp5	-0.848736	3.77299e-28	-0.620114	3.54366e-15	-0.41183	3.05172e-07	-1.22603	3.33256e-57
ENSRNOG00000047057	Gpr26	-2.36233	3.77299e-28	-1.35005	3.99758e-09	1.17231	0.000127526	-0.22407	0.49771
ENSRNOG00000004890	Adcy8	2.06942	3.89806e-28	1.68245	7.47316e-19	1.08736	1.16749e-08	3.53404	1.56618e-59
ENSRNOG00000009255	Timm29	-0.815511	4.03868e-28	-0.662368	6.76668e-18	-0.764816	8.69462e-23	-0.591638	3.01431e-13
ENSRNOG00000033202	Fbxo41	-1.33927	4.28881e-28	-0.960775	2.16757e-14	1.6307	1.82275e-26	-0.693443	1.61554e-07
ENSRNOG00000022163	LOC102555023	5.79878	4.56609e-28	2.56676	3.73475e-10	3.89117	4.2589e-17	5.31973	1.04041e-21
ENSRNOG00000012663	Mfsd6	-0.810139	5.19659e-28	-0.900046	7.3123e-34	-1.6598	7.72807e-116	-0.719877	5.44339e-21
ENSRNOG00000006060	Matn2	2.78709	5.45111e-28	0.862146	0.00137751	2.5944	7.3669e-24	4.37554	3.21021e-53
ENSRNOG00000007433	Cyb561	-1.44398	5.72644e-28	-1.39871	1.96391e-25	-1.16942	4.90036e-17	-2.15816	1.16559e-60
ENSRNOG00000001645	Filip1l	1.92127	5.73036e-28	2.6641	5.32756e-49	3.27618	2.0766e-64	2.41037	4.98413e-39
ENSRNOG00000027645	Syndig1l	2.53546	5.9668e-28	0.96246	2.52076e-07	-0.210809	0.283081	-4.62259	1.8202e-274
ENSRNOG00000006037	Snap25	-1.32803	5.98525e-28	-0.269815	0.0533492	-0.0641232	0.693595	0.24524	0.0828651
ENSRNOG00000018337	Caly	1.03408	6.46452e-28	-0.230814	0.0263154	0.455012	3.55168e-06	-0.266913	0.00973472
ENSRNOG00000011171	Rims3	-2.35815	6.51483e-28	0.625421	0.0135012	0.382146	0.148095	1.03363	4.30118e-05
ENSRNOG00000003990	Grb2	0.974312	7.63407e-28	0.964944	1.11883e-26	1.21712	5.00184e-40	1.15121	1.77709e-35
ENSRNOG00000016611	Hras	-1.17504	7.68783e-28	-1.0743	1.26568e-22	-0.562463	2.06005e-06	-1.53416	4.48021e-45
ENSRNOG00000018317	Aak1	-0.96717	7.88305e-28	-0.834931	8.4829e-21	0.520378	1.43157e-08	-0.110354	0.330602
ENSRNOG00000017863	Zeb1	1.2361	8.04588e-28	1.41523	2.00467e-35	0.924599	6.80444e-16	0.713423	1.09116e-09
ENSRNOG00000047247	Ptprs	-0.669697	8.45706e-28	-0.869735	4.25296e-46	0.399172	4.53209e-10	-0.196182	0.0041031
ENSRNOG00000002793	Sstr2	-4.61126	9.98566e-28	-4.78033	1.49306e-29	-2.75359	8.86301e-10	-4.20327	1.61078e-22
ENSRNOG00000011946	Ptn	1.33066	1.03519e-27	1.85903	9.88358e-53	1.99063	3.07488e-60	1.81249	7.94205e-50
ENSRNOG00000020901	S1pr5	-1.73359	1.04757e-27	-1.28968	4.45284e-15	-3.85342	4.28399e-139	-1.27543	3.5208e-14
ENSRNOG00000027514	Ube2m	-0.692711	1.17749e-27	-0.429015	1.27407e-10	-0.271946	0.000110723	-0.56141	8.02548e-17
ENSRNOG00000020930	Atxn7l3	-1.18326	1.19615e-27	-0.662773	5.60075e-09	-0.0293117	0.860196	-0.823088	4.1558e-13
ENSRNOG00000004498	Scin	6.46538	1.26374e-27	6.06422	3.37135e-25	5.10479	3.5777e-20	5.45528	1.79363e-20
ENSRNOG00000006380	Srsf6	0.587877	1.27173e-27	0.361817	7.5117e-11	0.543836	8.01813e-22	0.238167	5.80199e-05
ENSRNOG00000019253	Bcar1	-1.03404	1.28673e-27	-0.939379	4.94205e-22	-1.40322	1.19054e-48	-0.579989	5.43003e-08
ENSRNOG00000027540	Fam102b	1.64879	1.28906e-27	1.46919	1.17436e-21	0.572153	0.000245299	0.85262	6.64239e-08
ENSRNOG00000015376	Npas1	-3.55594	1.62473e-27	-4.12163	6.93101e-37	-2.84165	1.66789e-16	-1.57674	8.72653e-05
ENSRNOG00000002024	Epha5	1.17442	1.67879e-27	0.175125	0.178635	2.38238	3.76053e-99	1.72648	1.1284e-54
ENSRNOG00000008966	Slco5a1	3.49861	1.71959e-27	4.12059	1.23792e-30	3.67622	2.15436e-24	4.09946	1.15963e-25
ENSRNOG00000013962	Magi2	-0.871738	1.82384e-27	-0.502321	2.21298e-09	0.323194	0.000346574	-0.523957	8.35709e-10
ENSRNOG00000030515	Nfasc	-0.905289	1.85253e-27	-0.745377	1.0238e-18	-1.69642	7.77085e-95	-0.668933	4.02327e-15
ENSRNOG00000003134	Slc4a4	0.853171	1.92203e-27	1.02049	2.6147e-38	-0.133753	0.138458	0.933229	9.8638e-32
ENSRNOG00000001295	S100b	-1.27201	2.3257e-27	-0.950595	1.42023e-15	-2.88191	5.77994e-138	-0.851369	1.23254e-12
ENSRNOG00000003496	Tbc1d9	0.900226	2.42719e-27	1.26265	4.70592e-51	1.86001	5.78505e-101	1.21924	5.27585e-46
ENSRNOG00000008088	Btbd3	-1.11466	2.54569e-27	-0.928148	6.3108e-19	-0.4043	0.000239095	0.608962	7.25437e-08
ENSRNOG00000004827	Papola	0.730483	3.0349e-27	0.391401	2.06905e-08	0.740402	2.10122e-26	0.414077	6.37433e-09
ENSRNOG00000002461	Nid1	2.09224	3.3984e-27	2.57862	1.20181e-39	0.933583	2.58138e-06	1.98529	6.86003e-24
ENSRNOG00000024482	Tnrc18	0.720649	3.40298e-27	0.575682	2.39864e-17	1.61842	5.21511e-109	0.36108	3.7968e-07
ENSRNOG00000021338	Tmem132a	-1.5228	3.52252e-27	-0.615748	4.28599e-05	0.829003	3.2415e-08	-1.33932	6.48955e-21
ENSRNOG00000017302	Slc6a3	6.28823	3.85939e-27	5.42967	1.37237e-23	6.36975	2.05856e-24	5.51783	1.16553e-20
ENSRNOG00000023851	Igsf3	1.88983	3.92084e-27	2.26612	1.30303e-37	0.996155	2.31649e-08	2.95966	6.75858e-59
ENSRNOG00000010268	Vom2r44	1.65427	4.11294e-27	0.705808	4.79538e-06	1.55318	1.92578e-21	1.02498	1.77746e-10
ENSRNOG00000021814	Tnfrsf25	-2.47612	4.24209e-27	-3.88992	9.06768e-69	0.653556	0.0843122	-0.831158	0.00559514
ENSRNOG00000002436	Mmd	-1.33806	4.335e-27	-1.3465	3.46834e-27	1.21637	7.62016e-20	-1.63423	1.24898e-39
ENSRNOG00000021168	Anp32e	0.788954	4.48337e-27	0.699763	4.39711e-21	0.673562	2.56515e-19	0.803399	3.16018e-26
ENSRNOG00000018553	Pitpnm1	-0.981716	4.48337e-27	-0.479416	5.40944e-07	0.388392	7.51948e-05	-0.948669	7.71231e-25
ENSRNOG00000015732	Bcl2l2	-0.935446	4.67232e-27	-0.65287	2.30507e-13	-0.242551	0.0118208	-0.37965	5.78908e-05
ENSRNOG00000000841	Ddx39b	0.622017	4.76376e-27	0.382578	1.11598e-10	0.920381	8.96645e-55	0.0808744	0.263023
ENSRNOG00000009946	Ldlr	-1.12107	4.7665e-27	-1.21157	8.11248e-31	-2.77763	7.27786e-170	-0.403988	0.000986931
ENSRNOG00000002039	Evi5	0.663857	4.99726e-27	0.740578	3.63819e-32	0.694166	1.99753e-27	0.865287	2.83357e-40
ENSRNOG00000010649	Ctnnd2	-0.823381	5.6255e-27	-0.639612	2.29345e-16	0.422193	2.15705e-07	-0.843021	1.3619e-27
ENSRNOG00000022784	Fzd10	-2.40405	6.21679e-27	-2.09885	4.91198e-20	-3.84763	1.6559e-69	-2.34255	2.53978e-24
ENSRNOG00000016813	Tia1	1.3131	6.63587e-27	0.709212	1.50891e-08	1.3848	4.38616e-28	0.908258	7.79791e-13
ENSRNOG00000037476	Galnt9	-2.66959	7.18949e-27	-2.73044	6.64454e-28	-1.00375	0.000146078	-0.351819	0.270963
ENSRNOG00000009381	Mapk6	-0.689742	7.60344e-27	0.144082	0.0657648	-0.898021	1.90036e-43	0.116283	0.168193
ENSRNOG00000030759	Nhs	1.92894	8.5099e-27	1.96072	8.80729e-26	0.786648	1.21658e-05	1.30064	5.48605e-12
ENSRNOG00000012178	Lmbrd1	-0.789316	9.51502e-27	-0.674596	3.09936e-19	-1.6065	6.63425e-109	-0.866642	1.53206e-30
ENSRNOG00000010188	Satb2	-5.34113	9.86279e-27	-3.26557	1.86018e-10	0.532648	0.407599	-2.83223	4.9486e-08
ENSRNOG00000015718	RGD1307461	1.74645	1.02919e-26	3.41469	1.34687e-70	2.63897	7.72668e-46	2.71665	3.53513e-46
ENSRNOG00000008659	Arhgap21	-0.554579	1.05586e-26	-0.990719	1.82798e-83	-0.208429	0.000168238	-0.201746	0.000408525
ENSRNOG00000010964	Akap13	1.54962	1.06808e-26	0.799408	8.84313e-08	0.786834	1.07967e-07	1.84784	7.96474e-36
ENSRNOG00000017002	Adrb1	-2.58222	1.06808e-26	-1.09751	7.86328e-05	1.16574	0.00345308	-1.36946	1.00681e-06
ENSRNOG00000042458	AABR07046707.1	-1.06918	1.08883e-26	-0.679925	4.1269e-11	-0.00254462	0.990208	-0.493885	3.751e-06
ENSRNOG00000007682	Gria3	-0.960765	1.1465e-26	-0.742331	4.23071e-16	1.00874	1.52064e-27	-0.485729	2.71275e-07
ENSRNOG00000014702	Elovl2	0.981506	1.16675e-26	1.42552	4.41792e-53	0.997059	1.19791e-26	1.35775	1.24482e-46
ENSRNOG00000010083	Prpsap1	1.10633	1.19399e-26	0.97851	1.90483e-20	0.674098	3.81456e-10	0.724917	4.43593e-11
ENSRNOG00000048145	Sstr1	-4.22763	1.23815e-26	-3.42574	1.56002e-17	-2.53203	6.06751e-10	-2.16848	3.01467e-07
ENSRNOG00000024737	Tnrc6a	0.637823	1.28414e-26	0.674196	9.66595e-29	0.441518	7.83232e-13	0.571532	4.33231e-20
ENSRNOG00000014265	Tnfrsf19	-1.10584	1.29291e-26	-1.61094	2.68528e-56	-1.12952	1.09149e-25	-1.68765	4.49918e-59
ENSRNOG00000016980	Qprt	3.38531	1.35841e-26	3.09966	1.44815e-22	1.96772	1.72183e-11	3.50011	2.09583e-20
ENSRNOG00000021153	Fkbp2	-0.898209	1.43277e-26	-0.432346	2.64014e-06	-0.978174	2.60319e-29	-0.593879	1.77555e-10
ENSRNOG00000007422	Vav2	1.91651	1.46179e-26	1.27242	1.82311e-12	0.106823	0.640045	1.7593	1.30366e-20
ENSRNOG00000009001	Mtss1	1.08243	1.51719e-26	0.510174	1.25333e-06	-0.679481	1.14823e-11	0.785082	1.07153e-13
ENSRNOG00000021217	Itga10	5.14889	1.57756e-26	5.0866	2.08318e-25	6.01929	1.42361e-31	3.74168	1.09361e-14
ENSRNOG00000003603	Arhgap44	-1.47376	1.623e-26	-1.33223	1.41284e-21	-0.71641	6.82433e-07	-0.444369	0.00418166
ENSRNOG00000038406	Tmem132b	-1.03363	1.623e-26	-0.752449	1.33101e-13	-0.615458	6.84879e-09	-1.1335	3.77464e-29
ENSRNOG00000003611	Dynlt3	-0.957374	1.86382e-26	-1.36517	6.20956e-53	-1.24683	1.17579e-43	-0.930435	6.92129e-24
ENSRNOG00000018217	Syt5	-1.04372	1.96397e-26	-1.04586	5.23081e-26	1.3294	4.13268e-29	-1.69649	9.4799e-68
ENSRNOG00000005434	Sptbn1	-0.550269	2.03277e-26	-0.30921	7.19049e-09	-0.0197064	0.785309	-0.178531	0.00156075
ENSRNOG00000026748	Dennd2a	1.34195	2.17236e-26	0.521877	7.8824e-05	0.815149	2.73269e-10	1.50749	5.46998e-30
ENSRNOG00000045558	Cd34	-3.04805	2.24126e-26	-1.02608	0.00111184	-0.194137	0.61989	-0.600614	0.0813752
ENSRNOG00000058626	Kcnh8	3.58357	2.57024e-26	2.4959	3.43356e-16	2.03905	3.28727e-11	4.05943	1.84299e-21
ENSRNOG00000005358	Pmm1	-0.951628	2.93336e-26	-0.583246	8.40979e-10	-0.55236	1.32461e-08	-0.528426	1.26498e-07
ENSRNOG00000019985	Asic4	2.03638	3.18e-26	2.33174	1.00586e-30	2.25591	1.17605e-26	-1.90401	2.11771e-28
ENSRNOG00000059662	AABR07004228.1	3.30404	3.25885e-26	3.04194	3.9473e-22	3.37875	1.46239e-23	3.85079	3.76703e-26
ENSRNOG00000017610	Nedd4l	-0.639386	3.87738e-26	-0.845791	1.17482e-44	1.47868	1.65979e-89	-1.41644	1.8256e-124
ENSRNOG00000032350	Kcnip4	-1.54666	4.09467e-26	-1.35317	7.30082e-20	-0.743519	1.46279e-06	-0.554089	0.000689247
ENSRNOG00000003229	Tspan7	-0.852772	4.45691e-26	-0.707069	4.70195e-18	-0.0292395	0.797354	-0.659869	9.57685e-16
ENSRNOG00000017619	Aldh1a1	-1.72536	4.59177e-26	-1.28075	2.7593e-14	-3.04718	5.41212e-81	0.037161	0.896704
ENSRNOG00000060544	Kdm5b	0.656825	4.78802e-26	0.646733	1.90906e-24	1.53519	8.36184e-110	0.227994	0.000902359
ENSRNOG00000007369	Shisa4	-1.39888	4.96433e-26	-1.07227	2.5683e-15	-1.77685	2.276e-41	-0.466998	0.00175555
ENSRNOG00000001715	Ece2	1.22173	5.36262e-26	0.477952	6.78533e-05	0.226452	0.0786399	0.0612342	0.708048
ENSRNOG00000004127	Cep170	0.784043	5.90598e-26	0.648111	1.21006e-17	0.521037	1.36412e-11	0.835382	1.57217e-26
ENSRNOG00000004928	Sntg2	2.38488	5.96015e-26	1.87638	4.75827e-17	4.0611	1.78358e-33	1.99241	2.102e-16
ENSRNOG00000019721	Ypel3	-0.96306	6.05784e-26	-0.65883	4.39043e-12	-0.485639	8.35204e-07	-0.231366	0.0385192
ENSRNOG00000006663	Usp2	-1.27916	6.91179e-26	-1.01742	4.83871e-16	1.07062	3.21649e-12	-1.34728	4.63427e-27
ENSRNOG00000005133	Mapt	-0.760306	7.86571e-26	-0.637574	2.86642e-18	-0.229659	0.00310584	-0.399942	1.23955e-07
ENSRNOG00000013683	S1pr1	-1.08669	7.86571e-26	-0.84283	1.2432e-15	-0.627663	4.12162e-09	-0.833747	4.287e-15
ENSRNOG00000000398	Zup1	1.15952	7.90914e-26	1.28569	9.44635e-30	1.00685	2.48903e-18	1.25278	6.11783e-26
ENSRNOG00000005758	Btbd11	-1.75863	7.97147e-26	-1.34001	2.58618e-14	-2.26426	1.39072e-41	-0.736359	0.000311183
ENSRNOG00000017872	LOC688778	-3.92272	8.06482e-26	-4.31849	5.12333e-31	1.34273	0.0168838	-2.4736	4.91009e-10
ENSRNOG00000008337	Gjd2	2.10502	8.24331e-26	1.12771	7.07873e-09	0.931609	2.80042e-06	2.10874	5.30536e-21
ENSRNOG00000054891	Cnot6	0.971852	8.70875e-26	0.820943	2.6697e-18	1.09331	8.16022e-30	0.306898	0.00256551
ENSRNOG00000002827	Rbfox1	-1.08928	1.15089e-25	-1.053	7.29992e-24	0.36553	0.0010856	-1.23632	1.50675e-32
ENSRNOG00000014427	Chrnb4	3.81997	1.19794e-25	2.69282	9.53389e-16	3.60784	6.20619e-20	2.78273	1.54511e-14
ENSRNOG00000014218	Tmem25	-1.42338	1.33795e-25	-0.931875	4.20023e-11	-0.624534	1.94331e-05	-0.0545001	0.80511
ENSRNOG00000029644	Clec2l	-1.27899	1.3755e-25	0.0655825	0.73008	-0.359968	0.00900662	0.888478	5.52348e-10
ENSRNOG00000015528	Pja2	-0.679476	1.43362e-25	-0.668344	1.38781e-24	-0.0185214	0.844755	-0.767903	4.28642e-32
ENSRNOG00000023148	Col11a1	1.38458	1.62687e-25	1.75728	8.17481e-39	1.18324	1.76442e-18	0.883508	1.21508e-10
ENSRNOG00000011435	Osbpl10	-2.31063	1.76846e-25	-0.866557	0.000410404	-0.50069	0.0573941	-1.19505	6.48858e-07
ENSRNOG00000007837	Acot11	-1.62087	1.80197e-25	-1.28861	3.19256e-15	-2.5077	8.98103e-61	-1.31535	1.63931e-14
ENSRNOG00000033101	Myo18a	-0.688621	1.80391e-25	-0.513736	3.17822e-14	-0.175	0.0183231	-0.414289	3.05381e-09
ENSRNOG00000008870	Atf7ip	0.772847	1.86961e-25	0.845439	2.33297e-29	1.11323	1.83085e-47	0.567275	2.15248e-13
ENSRNOG00000004863	Mpped2	0.979644	1.96823e-25	0.251727	0.0143507	1.84388	6.99826e-67	-0.0876923	0.474362
ENSRNOG00000008704	Nlk	-1.13593	2.17092e-25	0.0311833	0.862547	0.471638	7.17674e-05	0.0161992	0.930418
ENSRNOG00000061004	Asphd2	-1.57206	2.41628e-25	-1.83106	7.32995e-34	0.65652	0.000413986	-1.2538	2.38978e-15
ENSRNOG00000016055	Fkrp	-1.05857	2.46944e-25	-0.776906	2.25454e-13	-0.713184	4.77228e-11	-0.688208	5.57903e-10
ENSRNOG00000016156	Nptxr	-2.95481	2.63568e-25	-2.63602	3.14129e-20	0.900887	0.00302974	-0.494355	0.146117
ENSRNOG00000025415	Mettl11b	-3.52055	2.67409e-25	-3.38869	6.76313e-23	1.17869	0.0575467	-4.07653	4.67828e-33
ENSRNOG00000057616	Ptch2	3.10468	2.72841e-25	2.61626	4.84012e-19	1.74086	8.37307e-10	2.15404	8.46956e-13
ENSRNOG00000003841	Kcnh1	-1.52569	2.86252e-25	-0.229436	0.20951	1.68685	3.14226e-25	-0.44491	0.0072088
ENSRNOG00000013971	Psat1	-1.01532	2.97341e-25	-1.2224	5.5898e-36	-1.77207	1.38278e-75	-1.4149	1.6833e-47
ENSRNOG00000038911	AABR07067499.1	-2.16041	3.03676e-25	-1.42514	1.65331e-10	0.69446	0.0301118	-1.98752	1.31855e-19
ENSRNOG00000061508	Reps2	-1.69905	3.03933e-25	-1.17727	3.53047e-12	-0.102948	0.658822	-0.987871	1.68358e-08
ENSRNOG00000027152	N4bp2	2.23527	3.20699e-25	1.71922	2.04105e-15	1.33442	8.23576e-10	1.37627	4.97422e-10
ENSRNOG00000046889	Dbi	0.818301	3.22655e-25	0.545497	1.39401e-11	-0.72109	3.6873e-21	0.777456	1.46653e-20
ENSRNOG00000020577	Pip5k1c	-1.03794	3.25548e-25	-0.609504	3.54382e-09	1.42846	4.9015e-44	-0.03372	0.82716
ENSRNOG00000006237	Gpr37l1	-0.838575	3.31523e-25	-0.64123	8.22128e-15	-0.898952	1.83884e-28	-0.348767	7.54841e-05
ENSRNOG00000025130	Ltk	-2.74305	3.33504e-25	-2.1058	7.35988e-15	0.376228	0.293313	-2.6442	5.74751e-23
ENSRNOG00000009482	Emx2	-1.62959	3.34348e-25	-2.10223	9.84543e-42	4.13459	5.63912e-20	-0.6825	0.000348211
ENSRNOG00000013290	Nrip3	1.96477	3.36968e-25	0.451708	0.0354881	2.86956	2.16735e-52	3.5383	1.24746e-77
ENSRNOG00000001851	Far2	-1.68192	3.41142e-25	-1.14175	8.44466e-12	0.0756083	0.74769	-1.27389	2.73933e-14
ENSRNOG00000024040	Mb21d2	-1.35229	3.42951e-25	-0.686347	9.90461e-07	-0.93009	1.16029e-11	-0.993504	7.15889e-13
ENSRNOG00000005960	RGD1311744	2.11525	3.48639e-25	1.7869	3.67503e-18	-0.594055	0.00337234	1.24368	3.2365e-09
ENSRNOG00000015084	Necab2	1.48298	3.50213e-25	-0.820627	3.89846e-09	1.18741	7.88586e-16	-1.48424	4.73974e-28
ENSRNOG00000020853	Scap	-0.705823	3.53611e-25	-0.575238	1.87146e-16	-0.544981	1.54555e-14	-0.673999	1.76384e-21
ENSRNOG00000048152	Myo1b	-1.20983	3.80285e-25	-0.140967	0.377482	-0.196471	0.18196	-1.26209	7.72951e-26
ENSRNOG00000020687	Dpf1	0.943989	4.49007e-25	0.620341	2.88358e-11	3.13911	5.32399e-142	-0.214263	0.0366735
ENSRNOG00000004650	Begain	-0.948729	5.03579e-25	-0.91155	9.94411e-23	0.311535	0.00302969	-1.33055	2.17272e-47
ENSRNOG00000008137	Cdk18	-1.74723	5.43887e-25	-1.46334	3.24211e-17	-4.53614	8.88872e-172	-1.67585	6.92609e-22
ENSRNOG00000003844	Dhx15	0.718974	6.167e-25	0.653038	4.92237e-20	0.782822	2.66077e-26	0.345328	4.88417e-06
ENSRNOG00000032206	Cntnap5b	-4.20375	6.23927e-25	-2.94804	1.7291e-12	-1.51556	0.000615391	-0.580957	0.284922
ENSRNOG00000007442	Ubl7	-1.32528	6.23927e-25	-0.498241	0.000359341	-0.654824	1.13965e-06	-0.160017	0.344385
ENSRNOG00000020295	Plekhn1	1.34599	6.50454e-25	1.09264	1.58801e-16	2.921	3.99105e-75	0.666288	1.28871e-06
ENSRNOG00000051204	Dop1b	-0.936575	7.20367e-25	-0.832436	1.84498e-19	-0.0190314	0.89303	-0.568845	3.29966e-09
ENSRNOG00000046949	Kcnb1	-0.954366	7.58722e-25	0.110903	0.367439	2.05852	5.43053e-79	-0.207864	0.0601683
ENSRNOG00000012944	Casp9	-1.30447	8.19219e-25	-1.06271	3.71336e-16	-0.108823	0.540791	-1.54618	3.48374e-33
ENSRNOG00000025594	Scrt1	-1.38041	8.53279e-25	-0.000348464	1	0.234094	0.161247	0.103296	0.603082
ENSRNOG00000005970	Lrrc1	1.32105	8.76237e-25	1.1099	1.99077e-17	-0.233386	0.0901195	-0.194545	0.191807
ENSRNOG00000030547	Dpp6	0.821056	8.87479e-25	0.234672	0.00761067	0.872545	1.41063e-27	0.16464	0.0762786
ENSRNOG00000008592	Barx2	-4.68907	9.57472e-25	-1.19506	0.0424877	-2.83623	8.19445e-09	-2.65527	1.81696e-07
ENSRNOG00000043143	Eml1	-1.35478	1.04794e-24	-1.12808	5.93541e-17	-3.41003	3.56712e-157	-2.06285	7.98757e-56
ENSRNOG00000014293	Nkd1	-1.43037	1.06249e-24	-1.07469	1.10249e-13	-3.94051	6.44564e-193	-0.949677	3.11226e-10
ENSRNOG00000006784	Sema4f	-1.20215	1.08025e-24	-0.882349	4.27123e-13	0.00216945	0.994239	-1.25399	3.17277e-25
ENSRNOG00000054775	Arf3	-0.684537	1.15979e-24	-0.855824	1.29841e-37	1.48299	1.46059e-75	-1.14853	3.07499e-66
ENSRNOG00000016288	Tcea2	-1.04063	1.22172e-24	-0.970797	5.24338e-21	-0.424859	0.000141812	-0.704615	8.50744e-11
ENSRNOG00000010812	Osbpl6	-0.866306	1.23378e-24	-0.683293	2.52043e-15	-0.249359	0.00783033	-0.0298843	0.824185
ENSRNOG00000009745	Ppp3cc	1.35722	1.23895e-24	1.33627	3.50992e-23	1.35952	4.43682e-23	1.70878	2.11063e-33
ENSRNOG00000022844	Pdzrn4	1.95521	1.2504e-24	2.01574	3.72481e-24	1.61935	9.16435e-16	2.30198	2.00777e-24
ENSRNOG00000008831	Hcn2	-0.860249	1.2604e-24	-0.0478716	0.706533	-1.7396	6.17892e-99	-0.472721	1.62149e-07
ENSRNOG00000023935	Nrsn2	1.12808	1.31124e-24	0.144462	0.279393	0.22968	0.0598853	-0.474737	2.34441e-05
ENSRNOG00000018651	Agtpbp1	-0.723049	1.31945e-24	-0.488135	1.64235e-11	0.248522	0.00116935	-0.396928	9.12896e-08
ENSRNOG00000018526	Dlg4	-0.774381	1.34716e-24	-0.697094	6.19423e-20	1.17175	1.85306e-52	-1.06855	8.48993e-46
ENSRNOG00000016558	Pllp	-1.4894	1.53948e-24	-1.38821	5.99347e-21	-3.54752	1.81741e-140	-1.4572	1.99115e-22
ENSRNOG00000007551	Patj	1.38871	1.71585e-24	1.17026	2.3968e-17	-1.23914	1.20129e-23	-0.581984	1.42488e-05
ENSRNOG00000022957	Ctxn3	2.08047	1.71892e-24	3.82686	2.45681e-47	2.96486	1.59392e-32	2.62515	1.77838e-27
ENSRNOG00000013516	Sf3b1	0.524543	1.71935e-24	0.400995	1.72464e-14	0.918069	2.42301e-69	0.286039	1.17859e-07
ENSRNOG00000010607	Rnf208	-1.42745	1.78733e-24	-0.984321	8.12552e-12	-0.689221	2.93729e-06	-0.737364	8.26343e-07
ENSRNOG00000005228	Gnptab	-0.625325	1.80105e-24	-0.573648	6.05077e-20	-0.647737	2.00997e-24	-0.338782	7.54733e-07
ENSRNOG00000005504	Pkp4	-1.07879	1.80209e-24	-1.19519	1.11196e-29	-2.81216	4.4722e-163	-1.06644	1.12248e-23
ENSRNOG00000008825	Ssrp1	0.710829	1.9073e-24	0.356708	8.69259e-07	0.52631	2.53729e-13	0.429792	5.32988e-09
ENSRNOG00000013587	Fam135a	0.913848	2.38172e-24	0.8057	1.20973e-18	0.350869	0.000212654	0.73847	6.06646e-15
ENSRNOG00000025509	Apbb2	-1.3544	2.52384e-24	-0.742318	3.26563e-07	-1.55135	3.95161e-30	-0.583857	0.000244706
ENSRNOG00000025781	Sec31b	2.2168	2.68524e-24	1.89349	4.33651e-18	0.894115	2.55771e-05	1.52627	2.03694e-11
ENSRNOG00000001628	Pcp4	1.46577	2.79237e-24	1.82992	1.14918e-36	1.79368	3.53655e-35	-1.0152	3.07959e-12
ENSRNOG00000036794	Asb16	4.79535	3.07626e-24	4.44433	1.63822e-21	2.71828	1.03527e-11	5.43106	7.01444e-21
ENSRNOG00000050090	Slc6a17	-1.0335	3.8997e-24	-0.386357	0.000419729	1.66705	2.72301e-58	0.120173	0.359283
ENSRNOG00000018507	Gfpt1	0.684207	4.02722e-24	0.45245	6.445e-11	0.479168	5.61726e-12	0.602716	1.00377e-17
ENSRNOG00000057044	Garnl3	-2.35368	4.08881e-24	-0.645558	0.0133779	-0.220438	0.456149	-0.450174	0.105164
ENSRNOG00000017333	Syt4	-0.978267	4.24674e-24	-0.661606	2.54991e-11	0.0161844	0.912304	-0.860187	2.09141e-18
ENSRNOG00000011523	H2afy	0.631841	4.50094e-24	0.545121	1.7153e-17	0.783856	5.58989e-31	0.464791	7.44324e-12
ENSRNOG00000018975	Atg9a	-0.835475	4.50094e-24	-0.426563	9.90761e-07	-0.0152185	0.904724	-0.459958	1.71981e-07
ENSRNOG00000019615	Colq	3.67557	4.57855e-24	1.75452	1.8728e-09	1.9183	9.6424e-10	2.25338	2.35151e-11
ENSRNOG00000033697	Casp4	2.04311	4.58311e-24	2.08577	2.45948e-23	1.46184	1.87025e-12	2.37883	7.15173e-24
ENSRNOG00000016603	Rtn2	-0.960383	4.64118e-24	-0.356538	0.00073327	-0.181788	0.11725	-0.639754	3.63492e-10
ENSRNOG00000021891	Zdhhc8	-1.48383	4.77604e-24	-0.166885	0.390585	0.365634	0.0292366	0.269621	0.138774
ENSRNOG00000020474	Pin1	-1.20454	4.78832e-24	-0.965772	3.23711e-15	-0.86502	4.03918e-12	-1.02513	1.96692e-16
ENSRNOG00000019435	Psd	-0.965697	5.2631e-24	-1.17939	3.32925e-35	2.48635	4.63619e-113	-1.1243	9.58097e-32
ENSRNOG00000014251	Capn5	-1.28829	5.47288e-24	-0.871344	4.4718e-11	-0.843767	2.09706e-10	-0.015406	0.946994
ENSRNOG00000005668	Ndufa8	-0.965986	5.61684e-24	-0.824795	3.3422e-17	-0.97669	1.24206e-23	-0.802175	1.12017e-15
ENSRNOG00000005573	Ntn4	1.86123	6.1704e-24	2.63283	5.66198e-41	1.79188	9.30887e-21	2.85537	5.49672e-41
ENSRNOG00000013674	Megf10	0.8458	6.9602e-24	0.781067	6.10175e-20	-0.718912	1.38382e-18	1.0825	7.15129e-34
ENSRNOG00000004773	Yaf2	-0.95528	7.49938e-24	-0.735714	5.40654e-14	-0.416037	5.9338e-05	-0.283564	0.0115491
ENSRNOG00000012404	Thrsp	-2.59407	7.89605e-24	-2.43539	8.4829e-21	-2.40211	2.71941e-20	-1.92539	7.38487e-13
ENSRNOG00000003769	Tmem163	2.44975	8.43923e-24	2.8763	6.94601e-31	0.714699	0.00522482	2.64071	1.63258e-25
ENSRNOG00000016744	Chd6	0.723545	8.54392e-24	0.75235	4.07735e-25	0.554048	4.37501e-14	0.860826	2.21089e-31
ENSRNOG00000009577	Ndst4	4.57466	8.9543e-24	-0.592605	0.218745	0.67282	0.142011	2.91073	3.69166e-11
ENSRNOG00000032828	Mapk8ip2	-0.646429	9.42646e-24	-0.908771	7.04917e-46	-0.316328	3.2417e-06	-0.280464	6.75212e-05
ENSRNOG00000002256	Art3	2.03245	1.00147e-23	2.59149	3.0327e-33	-1.11428	4.16968e-09	0.630103	0.00332339
ENSRNOG00000001774	Lrch3	1.20809	1.0681e-23	0.798073	7.74311e-11	1.21673	1.59671e-22	1.13865	1.55467e-19
ENSRNOG00000020421	Fndc7	2.4717	1.10668e-23	1.97994	3.64358e-16	1.91916	4.64341e-14	2.64566	3.89768e-20
ENSRNOG00000004147	Abca8a	1.77511	1.10763e-23	0.792588	1.95758e-05	0.686089	0.000195928	1.48105	1.59876e-16
ENSRNOG00000021729	Iqub	1.6283	1.18368e-23	1.13213	6.75959e-12	2.86488	8.09377e-61	0.805378	2.12119e-06
ENSRNOG00000009205	Lmo4	-0.972949	1.22299e-23	-1.01434	4.01182e-25	1.00208	1.83734e-18	-0.755676	1.5125e-13
ENSRNOG00000033568	Mapk8ip3	-0.63772	1.25395e-23	-0.46336	1.04859e-12	-0.19554	0.00461207	-0.358587	8.13575e-08
ENSRNOG00000000866	Rbmx	1.1029	1.33584e-23	0.780151	3.54238e-12	1.33157	2.06495e-31	0.554297	1.90257e-06
ENSRNOG00000010350	Rcan2	-0.527978	1.359e-23	0.653262	1.34477e-32	-0.630284	1.49991e-32	-0.734793	1.42057e-43
ENSRNOG00000002372	Sgcd	4.33568	1.46727e-23	2.42774	2.21253e-10	3.01477	1.99923e-13	2.72409	2.65844e-11
ENSRNOG00000004794	Rtn1	-0.84408	1.49003e-23	-0.752577	9.35781e-19	0.0264659	0.82641	-0.683919	1.48892e-15
ENSRNOG00000002041	Boc	-1.71022	1.65265e-23	0.425565	0.0363622	0.180875	0.416674	0.899892	5.10979e-06
ENSRNOG00000004613	Gpm6b	-0.665666	1.66051e-23	-0.615322	4.9315e-20	-1.49936	1.67555e-116	-0.748931	3.68263e-29
ENSRNOG00000005388	Rassf3	-1.30291	1.66055e-23	-0.063414	0.771	-1.08361	4.24695e-15	-0.0635097	0.781025
ENSRNOG00000009347	Arhgap25	-1.99218	1.75217e-23	-1.16267	4.37532e-08	-0.49719	0.038618	-1.96357	8.03283e-22
ENSRNOG00000007907	Tmem178a	-2.20081	1.87853e-23	-1.59452	1.47362e-12	0.587039	0.0202815	-0.171029	0.582689
ENSRNOG00000017882	Camk1d	-1.13464	2.13861e-23	-1.38668	2.24173e-34	-0.244536	0.058719	-1.14948	1.4367e-23
ENSRNOG00000010534	Ankrd50	0.966101	2.14732e-23	1.4919	5.12585e-51	0.777332	5.03087e-15	0.764488	3.31939e-14
ENSRNOG00000010260	Dixdc1	-0.808658	2.46468e-23	-0.407101	2.27141e-06	-1.20095	4.44624e-50	-1.41016	1.34122e-68
ENSRNOG00000060105	Astn2	-1.01832	2.63983e-23	-0.383658	0.000712963	0.45956	0.000109499	0.512133	2.7209e-05
ENSRNOG00000016258	Zfp516	1.3238	2.65532e-23	1.34737	7.42249e-23	1.71398	5.20958e-31	0.490658	0.000626752
ENSRNOG00000004629	Fkbp3	-0.627491	3.00998e-23	-0.304566	8.06536e-06	-0.709143	7.38565e-28	-0.532678	2.13095e-15
ENSRNOG00000015182	Ppp2cb	-0.729652	3.14913e-23	-0.401061	2.6008e-07	-0.467955	1.50319e-09	-0.81475	3.5253e-27
ENSRNOG00000011854	RGD1563986	-1.39923	3.71732e-23	-1.2454	4.94801e-18	-1.53915	3.3032e-27	-1.64929	8.30093e-31
ENSRNOG00000052583	Zfp106	-1.06582	4.08417e-23	-0.673401	1.12572e-09	-0.921567	1.29954e-17	-0.711898	1.19554e-10
ENSRNOG00000019937	Kcnk1	-1.44704	4.19192e-23	-0.580024	0.000273511	-0.384706	0.0203942	-0.380447	0.0275213
ENSRNOG00000017431	RGD1304884	0.838478	4.60857e-23	1.47164	1.12575e-67	1.40325	2.65861e-61	1.77782	2.64703e-95
ENSRNOG00000060460	Clec1a	2.74985	4.73931e-23	0.890465	0.00113052	3.45066	1.22109e-25	4.09258	5.73795e-28
ENSRNOG00000048187	Epop	-3.64176	4.86994e-23	-0.984001	0.0214676	-0.44193	0.357443	-0.827324	0.066156
ENSRNOG00000007356	Chmp3	-0.796877	4.89246e-23	-0.547822	9.77987e-11	-0.308711	0.000742591	-0.860465	1.67241e-24
ENSRNOG00000047476	Wasf1	-1.15213	5.62512e-23	-1.73725	3.52796e-51	0.815812	1.93478e-11	-0.940519	2.38978e-15
ENSRNOG00000012830	Paqr8	-0.883571	7.33205e-23	-0.396647	4.58077e-05	-1.57645	5.05057e-71	0.130351	0.285393
ENSRNOG00000059081	AABR07026032.3	-1.62901	7.46309e-23	-1.47821	2.24851e-18	4.19902	3.65402e-24	-3.076	2.63209e-81
ENSRNOG00000049761	Htr6	-3.03965	8.28844e-23	-2.45518	3.2313e-14	-0.132284	0.822528	-4.61717	3.70801e-53
ENSRNOG00000025589	Jph4	-0.911184	8.5121e-23	-1.13692	8.85682e-35	0.918011	3.07733e-19	-1.27694	4.11976e-43
ENSRNOG00000009219	Hepacam	-0.91976	8.66896e-23	-0.810613	4.14133e-17	-1.75571	1.22851e-81	-0.597641	9.2502e-09
ENSRNOG00000049281	Gba	-0.629038	8.68291e-23	-0.677421	1.19125e-25	-0.272159	0.000110841	-0.23452	0.00150833
ENSRNOG00000001711	Hrasls	-2.81404	9.39069e-23	0.105312	0.839986	-2.09422	2.57741e-12	-0.421612	0.312946
ENSRNOG00000003386	Rbfox3	-1.09878	9.40807e-23	-0.465376	9.72413e-05	1.03817	5.14016e-19	0.0225746	0.900848
ENSRNOG00000018564	Nup93	1.4513	9.8299e-23	1.57207	9.61866e-26	1.88754	6.66532e-35	0.580979	0.000229867
ENSRNOG00000008758	Tspan18	2.44651	1.04866e-22	-0.0505223	0.894876	0.627808	0.014374	2.70753	8.17212e-23
ENSRNOG00000016167	Spata2L	-0.925925	1.05189e-22	-0.764475	3.45203e-15	2.4579	2.47405e-65	-1.43312	6.70265e-52
ENSRNOG00000004305	Abl2	1.15101	1.08e-22	0.667268	3.01512e-08	2.05473	7.46146e-58	0.645742	1.71776e-07
ENSRNOG00000029260	Pitpnm2	-0.978799	1.14015e-22	-0.423812	6.40816e-05	1.93645	1.71687e-78	-0.456387	1.60783e-05
ENSRNOG00000049496	Trim62	1.98587	1.24847e-22	1.9337	1.87125e-20	1.72158	1.1514e-15	1.6498	3.87425e-14
ENSRNOG00000021781	Camk1	0.922564	1.30445e-22	0.967073	1.38578e-23	1.63296	1.93088e-53	0.626765	4.49167e-10
ENSRNOG00000004333	Flywch1	-1.15652	1.34717e-22	-0.586208	2.39058e-06	-1.17916	2.00346e-23	-0.271812	0.0484065
ENSRNOG00000016890	Tppp3	-1.36603	1.4189e-22	-0.779811	4.19663e-07	-4.91782	0	-1.25781	9.39974e-17
ENSRNOG00000011475	Srcin1	-1.40451	1.45221e-22	-1.10278	4.16469e-14	-0.737797	6.4563e-07	-0.675053	9.31728e-06
ENSRNOG00000008761	Ncs1	-0.978622	1.52912e-22	-1.03784	4.50059e-25	-0.271411	0.0131288	-0.398721	0.000222833
ENSRNOG00000019958	Tmem151b	-1.47636	1.58369e-22	-0.617752	0.000165778	0.46861	0.00777464	-0.179125	0.37982
ENSRNOG00000028624	Kif26b	1.5605	1.5937e-22	-0.502802	0.00100088	0.260419	0.135771	0.553164	0.00114309
ENSRNOG00000007206	LOC361016	-1.74333	1.65476e-22	-1.71034	2.08255e-21	-3.58831	1.14503e-94	-1.73581	1.06001e-21
ENSRNOG00000033835	Dnm1	-0.886348	1.68313e-22	-0.88932	1.58653e-22	0.457777	1.0629e-06	0.118432	0.300838
ENSRNOG00000005472	Sp4	1.28645	1.7293e-22	1.13474	2.30971e-17	1.55234	4.0736e-29	0.825463	2.18228e-09
ENSRNOG00000060665	Afap1	0.673988	1.77896e-22	0.423817	2.60809e-09	-0.174246	0.019813	0.399666	8.91123e-08
ENSRNOG00000047581	AABR07066700.1	-2.1491	1.88703e-22	-1.58928	7.93514e-12	-2.16338	1.07834e-21	-0.390354	0.227026
ENSRNOG00000056550	Epb41l4b	-1.02204	1.92996e-22	-0.781773	3.84064e-13	-1.19796	4.92792e-30	-0.507928	8.6027e-06
ENSRNOG00000019506	Dnajb2	-0.812997	1.97519e-22	-0.297498	0.00128678	-1.32547	8.61017e-58	-0.249698	0.0104371
ENSRNOG00000018623	Rev1	0.654079	1.98351e-22	0.509383	1.39491e-13	1.16558	5.50724e-54	0.293602	7.58242e-05
ENSRNOG00000028274	Myrf	-1.58372	1.99441e-22	-1.59942	1.07685e-22	-3.27518	3.40139e-94	-1.66709	1.75848e-24
ENSRNOG00000026953	Gpr88	-4.81778	2.04742e-22	-2.00586	0.000145584	-1.79552	0.000595153	-8.01491	1.26231e-60
ENSRNOG00000001296	P2rx7	-1.31825	2.20024e-22	-0.851805	2.19431e-09	-1.07188	2.42299e-14	-0.75261	4.1167e-07
ENSRNOG00000003866	Cxcr4	3.09951	2.22355e-22	2.60335	7.07827e-17	1.05143	0.000306821	2.35295	8.33027e-13
ENSRNOG00000018992	Dpysl3	1.74572	2.3076e-22	0.374613	0.0620039	-1.02714	3.32807e-09	0.707353	0.000195728
ENSRNOG00000027089	Ell2	-0.976819	2.33308e-22	-0.451742	3.88809e-05	-1.02581	2.11407e-23	-0.605644	3.82138e-08
ENSRNOG00000048617	Ensa	-0.53687	2.39574e-22	-0.486745	5.59895e-18	0.497661	3.78922e-16	-0.122555	0.070528
ENSRNOG00000056697	Kcnab1	-1.36126	2.52163e-22	-2.72097	2.53579e-88	-1.76225	1.12176e-36	-4.48909	2.40383e-243
ENSRNOG00000046972	Chrm2	1.48087	2.52897e-22	2.91669	1.80749e-66	1.21909	6.77934e-15	2.74472	8.19412e-54
ENSRNOG00000024762	Frmd7	5.8818	2.59976e-22	6.08237	2.90369e-23	6.45864	1.98764e-25	5.49358	3.46077e-19
ENSRNOG00000003891	AC118957.1	-1.88796	2.60765e-22	-0.879933	4.46709e-05	1.17285	1.9859e-05	-0.67914	0.00377325
ENSRNOG00000014758	Lgi1	-0.641336	2.62535e-22	-1.54592	6.87102e-128	-0.169185	0.0236651	-0.68933	1.70349e-24
ENSRNOG00000020873	Nphs1	4.84113	2.65762e-22	4.02559	2.23946e-17	5.33799	1.06398e-20	5.103	2.70473e-19
ENSRNOG00000016423	Tacc1	-0.820126	2.69818e-22	-0.0235705	0.864231	0.293547	0.00125754	-0.365085	5.37193e-05
ENSRNOG00000013009	Ldha	-0.601168	2.7253e-22	-1.02533	1.93818e-63	0.861982	6.11464e-34	-0.943987	1.40602e-51
ENSRNOG00000036852	Pcbp2	0.592217	2.74379e-22	0.487339	5.16508e-15	0.406542	1.52497e-10	0.351953	6.68176e-08
ENSRNOG00000008187	Ubash3b	1.3795	3.00071e-22	0.908978	3.63893e-10	1.01289	2.57448e-12	1.90124	3.14543e-37
ENSRNOG00000007743	Mgst1	2.49342	3.06195e-22	1.326	1.80538e-08	-1.94405	9.89256e-24	0.798466	0.00133098
ENSRNOG00000053502	Arhgef17	0.870234	3.13405e-22	0.973083	5.51376e-27	2.05208	2.12335e-105	0.743187	7.20696e-16
ENSRNOG00000008392	Sbf1	-0.778886	3.36409e-22	-0.999478	8.30385e-36	-0.905926	1.67286e-29	-0.494071	4.11415e-09
ENSRNOG00000002722	Sec14l1	0.689615	3.40691e-22	0.717392	1.49565e-23	1.89007	3.33033e-144	0.35427	2.31345e-06
ENSRNOG00000001082	Abcb9	-1.37498	3.40691e-22	-0.57716	0.000200834	-0.679995	7.77537e-06	-0.951428	2.31902e-10
ENSRNOG00000046863	C1ql2	2.89105	3.63248e-22	-3.21485	7.23992e-83	1.52785	1.20261e-08	0.943548	0.000240068
ENSRNOG00000018830	Aff3	-1.1087	3.6327e-22	-1.24036	3.41538e-27	-0.39804	0.0016234	-1.16724	1.57726e-23
ENSRNOG00000047867	Klhdc8b	1.52579	3.67818e-22	1.03783	7.44594e-11	1.67523	2.244e-23	0.743156	7.72443e-06
ENSRNOG00000027592	Rerg	2.27492	3.72325e-22	0.321793	0.25703	2.2914	1.6826e-21	-0.132102	0.682939
ENSRNOG00000018851	Ppp2r2b	-0.743921	3.91812e-22	-0.477128	2.83813e-09	-0.640908	5.77112e-16	-0.428516	2.66113e-07
ENSRNOG00000029941	Grina	-0.789625	4.16429e-22	-0.997795	1.35109e-34	-1.10495	2.2088e-42	-0.703262	2.92276e-17
ENSRNOG00000016239	Zadh2	1.25603	4.3952e-22	1.7375	2.77842e-37	1.11138	2.34922e-16	1.49237	3.54885e-26
ENSRNOG00000059857	Rnd1	-1.92092	4.40451e-22	-0.312801	0.222469	-1.14157	5.03042e-08	-0.568077	0.0161641
ENSRNOG00000001726	Tmem44	-1.44602	4.79226e-22	-0.989118	2.89212e-10	0.54628	0.00371113	-1.043	7.70523e-11
ENSRNOG00000018586	Retreg2	-0.743213	4.85395e-22	-0.648866	1.10851e-16	-0.100307	0.292956	-0.303928	0.000344197
ENSRNOG00000022681	RGD1561113	-1.86696	4.85502e-22	-1.33777	2.33713e-11	-0.934065	6.62232e-06	-0.50897	0.02878
ENSRNOG00000016502	Dscaml1	1.11279	5.18592e-22	0.0437918	0.801637	1.93563	1.31038e-56	1.43386	9.55129e-33
ENSRNOG00000003614	Mgat5	-0.989242	5.21324e-22	-0.621763	7.77407e-09	0.106579	0.44272	-0.482163	2.34628e-05
ENSRNOG00000021259	Prnp	-0.542299	5.48962e-22	-0.757258	7.26977e-42	-0.484132	1.40425e-17	-0.420427	3.48539e-13
ENSRNOG00000061147	Fam189a2	-1.79001	5.58324e-22	-1.27338	9.86403e-11	-2.22608	6.84445e-33	-1.1752	1.61255e-08
ENSRNOG00000007865	Ephb1	-1.2401	6.02153e-22	-1.38993	5.18873e-27	-1.64447	1.38589e-37	-2.18555	1.48048e-66
ENSRNOG00000003108	Acbd4	-0.937666	6.57942e-22	-1.19185	1.48119e-34	0.133353	0.318735	-0.803955	1.23278e-14
ENSRNOG00000000716	Htr1f	2.41408	6.61213e-22	2.49894	6.38918e-22	2.75944	5.37292e-23	1.58648	7.81083e-10
ENSRNOG00000028121	Otop2	6.18907	6.61213e-22	4.4288	7.50005e-15	5.49051	1.67257e-17	5.765	2.36369e-18
ENSRNOG00000022741	Ilf3	0.834818	6.70342e-22	0.636243	6.38632e-13	1.1428	3.85117e-37	0.590225	7.46386e-11
ENSRNOG00000052025	Aes	-0.811453	6.72396e-22	-0.655686	2.57016e-14	-0.840783	4.42804e-23	-0.635565	3.44356e-13
ENSRNOG00000004158	Hdac9	1.62574	7.17426e-22	0.728976	3.48699e-05	2.79365	3.50797e-52	2.74523	1.13045e-49
ENSRNOG00000060530	Cdc34	-1.19775	7.18876e-22	-0.911774	2.67837e-12	-0.288561	0.063964	-0.820979	2.5478e-09
ENSRNOG00000011858	Unc5d	-2.23975	7.4147e-22	-2.85354	5.62467e-35	-0.397589	0.163971	0.368249	0.250328
ENSRNOG00000017975	Dnajb13	-3.10495	7.66224e-22	-4.49113	3.85636e-46	-1.00298	0.0141486	-1.56298	4.44182e-05
ENSRNOG00000038784	Piezo2	2.45875	7.89164e-22	-1.78303	9.93087e-18	0.96913	8.17523e-05	3.44327	4.38379e-23
ENSRNOG00000012149	Gpsm2	1.43096	8.191e-22	1.40705	3.41671e-20	1.09198	1.97134e-12	2.04703	2.30551e-32
ENSRNOG00000061544	Spock2	-0.873497	8.23124e-22	-0.613374	4.86416e-11	-0.177306	0.0891143	-0.511357	8.21322e-08
ENSRNOG00000003967	Vmp1	-0.997415	9.36956e-22	-0.669327	5.82672e-10	-1.49986	6.28482e-48	-0.690993	3.12806e-10
ENSRNOG00000034287	AABR07035916.1	2.34817	1.06635e-21	1.90934	1.02143e-14	4.00403	1.6229e-39	2.36562	1.08176e-19
ENSRNOG00000001194	Rrp1b	0.968178	1.11902e-21	1.03442	3.24984e-23	0.805383	4.66614e-14	0.269446	0.0186319
ENSRNOG00000050231	Gng12	-1.5344	1.15082e-21	-1.14616	6.79813e-12	-2.75124	1.7219e-69	-1.17104	8.18087e-12
ENSRNOG00000031092	Rock1	1.03675	1.15496e-21	0.660788	2.76621e-09	0.832002	2.90352e-14	0.924079	5.39602e-17
ENSRNOG00000011956	Aktip	-0.772011	1.20604e-21	-0.635249	2.16774e-14	-1.30391	1.71573e-59	-0.6989	1.81793e-16
ENSRNOG00000002069	Slc35a5	-0.989666	1.23481e-21	-0.848105	1.82807e-15	-0.956682	4.69736e-19	-1.0753	1.44115e-23
ENSRNOG00000016123	Rnf144b	-1.25918	1.3164e-21	-0.843229	8.29043e-10	-0.425787	0.00394021	-0.4676	0.00191383
ENSRNOG00000043387	Cpe	-0.597703	1.35202e-21	-1.12394	3.36181e-74	0.429643	1.75623e-11	-0.790608	7.3879e-37
ENSRNOG00000017258	Ica1l	-1.2488	1.40216e-21	-0.675543	1.81547e-06	0.722962	1.31306e-05	-1.17276	1.26802e-17
ENSRNOG00000042274	Fbxo31	-0.977724	1.40961e-21	-1.0485	4.84149e-24	-0.923405	5.99212e-18	-0.912149	5.10742e-17
ENSRNOG00000021400	Magee2	2.36706	1.43708e-21	0.899586	9.13144e-05	1.59732	1.83719e-10	1.17378	2.15655e-06
ENSRNOG00000001785	Etv5	-0.89704	1.48908e-21	-0.187574	0.0967888	1.0601	8.00912e-24	-0.156979	0.187701
ENSRNOG00000001313	Gnaz	-1.13962	1.54427e-21	-1.20363	1.52837e-23	-0.115587	0.469074	-0.631174	1.18872e-06
ENSRNOG00000048169	Tuba8	1.79509	1.6222e-21	0.980318	4.0867e-07	2.53254	9.27109e-38	4.60022	7.27665e-79
ENSRNOG00000051837	Nwd2	-1.88076	1.67933e-21	-1.98676	1.04212e-23	0.078819	0.783729	0.00988236	0.980769
ENSRNOG00000012470	Zc3h12c	1.43506	1.79389e-21	1.19034	7.53384e-15	1.28865	5.15495e-16	0.865388	5.69029e-08
ENSRNOG00000001514	Cdca7	3.38044	1.87631e-21	2.90843	1.79304e-16	2.05015	2.87409e-09	0.272863	0.519469
ENSRNOG00000019027	Habp4	-0.980277	1.9335e-21	-0.569254	1.37594e-07	-0.549983	3.51911e-07	-0.372683	0.00121081
ENSRNOG00000014171	Tnfsf13	-1.6319	2.11854e-21	-0.746919	6.61806e-05	-0.0384069	0.890545	0.104918	0.700959
ENSRNOG00000012942	Satb1	-2.08599	2.12043e-21	-1.34957	2.26702e-09	0.210596	0.450269	0.390939	0.145413
ENSRNOG00000039994	Upf3b	0.820817	2.17159e-21	0.608836	5.64342e-12	0.753854	7.03503e-17	0.548466	2.52226e-09
ENSRNOG00000053334	Stmn4	-0.700527	2.17159e-21	-0.318032	5.71793e-05	-1.28601	5.12082e-70	-0.577201	3.97586e-14
ENSRNOG00000008445	Dact1	2.63791	2.22873e-21	2.08824	2.23314e-14	1.20813	6.8043e-06	2.2983	1.72838e-14
ENSRNOG00000021125	Prdx5	-1.00652	2.66935e-21	-0.631109	2.18747e-08	-1.13352	1.54839e-25	-0.94385	3.39943e-17
ENSRNOG00000046744	Ankrd29	1.65184	2.77971e-21	1.77098	1.20037e-23	0.801079	7.69658e-06	2.91821	8.9575e-53
ENSRNOG00000009837	Tmem131l	1.7694	3.09711e-21	1.23218	8.66965e-11	2.42745	3.1495e-35	1.07295	3.07941e-08
ENSRNOG00000002835	Luc7l3	0.828757	3.11483e-21	0.705554	1.76576e-15	1.31005	4.98041e-50	0.723092	5.59643e-16
ENSRNOG00000060367	Rfx7	0.844852	3.12861e-21	1.13779	1.52421e-36	1.16727	1.47748e-37	0.864259	4.44467e-21
ENSRNOG00000002917	Sec14l5	-1.79077	3.44849e-21	-1.75926	8.29003e-20	-3.50749	7.78641e-84	-1.92054	1.67906e-22
ENSRNOG00000039530	Ccl27	-1.48397	3.50135e-21	-0.713977	3.68158e-05	0.609905	0.00293053	-0.668974	0.000237748
ENSRNOG00000001494	Napa	-1.05685	4.03464e-21	-1.13044	7.71985e-24	-0.328455	0.0071299	-0.67395	7.68245e-09
ENSRNOG00000050550	Nr2e1	-1.66941	4.23868e-21	-1.76466	5.75461e-23	4.16477	1.50015e-17	-1.82272	2.54493e-23
ENSRNOG00000006052	Sulf2	-0.913778	4.42576e-21	-1.35555	2.30195e-45	-1.35135	5.25365e-45	-0.425385	5.13065e-05
ENSRNOG00000051711	Kpna1	-0.509488	5.43038e-21	-0.208715	0.000470557	0.0240255	0.76615	-0.303438	3.70071e-07
ENSRNOG00000027880	Nbeal2	1.49224	5.47553e-21	1.66323	1.17984e-24	0.76218	2.9757e-06	0.717917	1.83343e-05
ENSRNOG00000022871	LOC691170	1.14349	5.56327e-21	0.792108	1.59549e-10	1.32186	6.21031e-24	0.723312	2.41581e-08
ENSRNOG00000001709	Ap2m1	-0.462968	5.60514e-21	-0.318818	3.30958e-10	0.0694163	0.246256	-0.212449	6.833e-05
ENSRNOG00000018602	Camta1	-0.979491	5.75199e-21	0.119399	0.384407	0.22664	0.0570521	0.0204494	0.904067
ENSRNOG00000004614	Lypd6b	-3.5737	6.05596e-21	-3.45173	4.14253e-19	-4.57863	2.15312e-34	-2.40908	1.6394e-08
ENSRNOG00000033608	Cd276	1.49016	6.18869e-21	1.52074	4.05165e-21	1.44342	8.85681e-19	1.85223	3.05685e-28
ENSRNOG00000013282	Mctp1	1.6574	6.67282e-21	0.212361	0.334691	2.27796	7.04279e-35	-1.82901	7.99791e-27
ENSRNOG00000002773	Rgs4	-2.45917	7.83894e-21	-0.403124	0.209589	1.33744	9.36331e-07	-2.08305	4.13982e-15
ENSRNOG00000018012	Tulp4	-0.472756	8.22609e-21	-0.309007	5.05017e-09	-0.263125	1.2027e-06	-0.287554	1.79101e-07
ENSRNOG00000046309	Gpr68	-2.70998	9.00373e-21	-3.15541	5.44363e-28	-2.99411	2.07338e-24	-2.17367	8.57105e-12
ENSRNOG00000013783	Efhd2	-1.77195	9.54466e-21	-0.851356	2.11692e-05	-0.573624	0.00495706	-0.228698	0.348139
ENSRNOG00000010156	Snapc5	-0.791051	1.03508e-20	-0.69639	2.0749e-15	-0.307931	0.00196107	-0.789882	3.6946e-18
ENSRNOG00000000168	Gatm	-1.2292	1.04448e-20	-1.05378	2.7233e-15	-2.29495	1.10771e-70	-0.923861	8.08283e-12
ENSRNOG00000020444	Hcn3	1.51244	1.07201e-20	1.62479	1.8017e-22	1.71415	4.08529e-23	1.42818	1.26556e-16
ENSRNOG00000004841	Akap6	-1.04574	1.0813e-20	-0.550747	2.59723e-06	-0.0989184	0.486136	-0.0876761	0.568556
ENSRNOG00000022054	Paqr7	-0.941516	1.16537e-20	-0.226122	0.0627964	-1.43231	3.95131e-46	-0.0907057	0.542549
ENSRNOG00000021472	Ermn	-1.90345	1.17156e-20	-1.80531	1.54618e-18	-4.5667	3.04021e-116	-1.96167	1.08061e-21
ENSRNOG00000018343	Isca1	-0.593054	1.19555e-20	-0.724961	6.03288e-30	-0.343132	3.98986e-07	-0.492515	2.01605e-13
ENSRNOG00000009433	Mcub	4.80666	1.24827e-20	3.38696	3.79497e-13	2.77818	1.66929e-09	3.59822	9.74826e-13
ENSRNOG00000015493	Emx1	-3.01128	1.28194e-20	-1.95484	6.71181e-09	3.28453	1.00675e-09	0.898372	0.044764
ENSRNOG00000019057	Prkcq	-1.3476	1.30736e-20	-1.3359	1.42718e-19	-2.25481	3.90529e-57	-1.23352	1.76809e-15
ENSRNOG00000011363	Napepld	-1.35364	1.52598e-20	-1.13871	6.51505e-14	-0.596708	0.000529486	-0.242637	0.258062
ENSRNOG00000007905	Itga7	0.973535	1.53915e-20	0.576693	8.29719e-08	1.39368	4.37052e-34	1.19118	1.93187e-25
ENSRNOG00000046834	C3	1.37571	1.63422e-20	1.01874	1.26591e-11	-2.85966	7.01186e-99	0.952822	8.88888e-10
ENSRNOG00000020060	Atf5	1.15003	1.71069e-20	1.19081	3.84678e-21	-0.614903	5.53343e-07	1.24929	1.22693e-21
ENSRNOG00000007254	Ttc9	-1.0283	1.73172e-20	-0.858823	6.09762e-14	-0.444152	0.000369578	-1.13333	5.3944e-23
ENSRNOG00000054121	AABR07061178.1	-1.03902	1.79848e-20	-0.881634	2.96755e-14	-0.431149	0.000847544	-1.03321	2.78539e-18
ENSRNOG00000002763	Ulk2	-0.579646	1.90424e-20	-0.349497	9.90076e-08	-0.28459	2.0905e-05	-0.276153	6.08644e-05
ENSRNOG00000004697	Baalc	-1.02075	1.9296e-20	-0.594481	2.12296e-07	0.12609	0.357035	0.68468	6.61945e-09
ENSRNOG00000042246	Tmem215	-4.03973	1.9333e-20	-2.34358	2.6236e-07	-0.158644	0.80833	0.00329483	0.999616
ENSRNOG00000011627	Zfr	-0.525508	2.02528e-20	-0.449984	5.52708e-15	0.00851108	0.921354	-0.338811	1.12569e-08
ENSRNOG00000037850	Marc2	-0.902309	2.03408e-20	-0.662414	1.08752e-10	-1.1838	8.17131e-33	-0.687279	1.60518e-10
ENSRNOG00000008713	Slc41a2	-1.2951	2.08945e-20	-0.293893	0.0804757	-0.739529	5.63328e-07	-0.124444	0.536008
ENSRNOG00000025371	Spry1	1.77226	2.18157e-20	1.98007	1.43449e-22	1.64581	1.87605e-15	1.25572	7.31125e-10
ENSRNOG00000053599	Pogz	0.673682	2.1845e-20	0.565437	2.51926e-14	1.24922	2.78807e-59	0.163462	0.0529736
ENSRNOG00000031997	Ttll7	-1.11091	2.36916e-20	-0.431635	0.000869474	-0.352469	0.00652307	-0.367388	0.00567809
ENSRNOG00000014341	Btbd10	-1.01751	2.80875e-20	-0.855854	3.15834e-14	-0.293489	0.0193661	-0.598682	4.75703e-07
ENSRNOG00000020281	Kif22	3.07453	2.89362e-20	2.95111	4.88152e-18	1.60238	3.52113e-07	1.79316	4.36352e-08
ENSRNOG00000004752	Nalcn	0.823429	3.78466e-20	0.225812	0.023913	1.52352	5.03667e-61	0.0277355	0.840084
ENSRNOG00000009029	Nptn	-0.819635	3.92056e-20	-0.655559	4.40207e-13	0.106913	0.324694	-0.853442	1.64242e-21
ENSRNOG00000016326	Cx3cl1	-0.759472	3.95433e-20	-0.0185956	0.892283	1.73011	9.37433e-92	-0.690184	1.55533e-16
ENSRNOG00000001385	Plbd2	-0.757848	4.14661e-20	-0.722004	1.23413e-17	-1.49342	9.32374e-76	-0.286936	0.0036327
ENSRNOG00000003834	Map2k4	-0.950569	4.15658e-20	-0.855573	5.8138e-16	-0.891308	5.64067e-17	-0.463723	6.42219e-05
ENSRNOG00000006924	Tmem125	-1.92655	4.19335e-20	-1.50248	5.26636e-12	-4.12582	1.34145e-93	-1.79097	2.31149e-16
ENSRNOG00000011394	Kif3c	-0.773525	4.55716e-20	-0.745876	1.83709e-18	-0.167772	0.0842173	-0.0378637	0.768952
ENSRNOG00000026791	Pgbd5	-0.783497	4.57364e-20	-0.848578	5.95399e-23	1.27986	1.85964e-36	-0.415331	9.5322e-06
ENSRNOG00000013938	Tshz3	-2.72082	4.6844e-20	-1.34184	1.88764e-05	-0.747636	0.0228502	-0.109983	0.812415
ENSRNOG00000058359	Fkbp8	-0.671786	4.95061e-20	-0.623593	4.67872e-17	-0.491915	7.28444e-11	-0.527764	4.6713e-12
ENSRNOG00000017116	Zfp532	0.673354	5.38174e-20	0.489731	7.96846e-11	0.765443	9.11519e-24	0.401909	2.78449e-07
ENSRNOG00000017495	Klhdc3	-0.662104	5.41494e-20	-0.268843	0.000635139	0.157904	0.0616194	-0.278501	0.000503618
ENSRNOG00000017712	Cartpt	2.53378	5.63046e-20	2.58541	6.254e-20	2.27429	1.28838e-15	1.46327	2.59779e-07
ENSRNOG00000008830	Nfe2l1	-0.857675	5.93804e-20	-0.248048	0.0189104	-0.438002	7.19262e-06	-0.504179	3.03861e-07
ENSRNOG00000007377	Slit3	-1.33574	6.26247e-20	-2.73989	4.3697e-83	0.053462	0.8089	-2.37731	1.31326e-61
ENSRNOG00000019573	Lcat	1.66144	6.42471e-20	1.13302	6.85228e-10	-1.62728	2.78911e-22	2.25029	5.50032e-28
ENSRNOG00000001170	Cox6a1	-0.973497	6.44654e-20	-0.505947	6.9359e-06	-0.515777	3.58968e-06	-0.717117	8.41751e-11
ENSRNOG00000061731	Plxnb3	-1.3676	6.77804e-20	-1.32898	1.34226e-18	-2.79088	1.73738e-81	-1.16824	2.89293e-14
ENSRNOG00000005176	Map7d2	-0.825287	6.93722e-20	-0.850894	8.66834e-21	-1.08169	3.31113e-33	-0.677042	4.55999e-13
ENSRNOG00000029865	Prss56	5.40762	6.93722e-20	5.25607	1.64976e-18	4.69436	3.02641e-15	1.6183	0.000321749
ENSRNOG00000013436	Pde7b	-1.29019	6.99815e-20	-0.681153	8.82389e-06	0.0618964	0.77897	-3.50171	6.57896e-149
ENSRNOG00000042446	Ankrd63	2.07612	7.02509e-20	1.80915	3.14816e-15	5.33862	3.55018e-28	-1.10541	1.76862e-08
ENSRNOG00000017164	Afap1l2	1.4058	7.41075e-20	1.5297	1.80927e-22	1.71854	1.25554e-26	1.52041	4.83556e-21
ENSRNOG00000022771	Arhgap23	-1.10273	7.51124e-20	-1.07106	1.52035e-18	-1.74709	9.51036e-49	-0.784071	4.43109e-10
ENSRNOG00000021248	Cdc25b	-1.43422	7.80565e-20	-0.769761	5.09259e-06	-1.52645	7.6301e-22	-1.00205	2.31903e-09
ENSRNOG00000016242	Fzd1	1.55357	7.82251e-20	0.187129	0.34726	0.883028	5.10168e-07	1.12402	9.05419e-10
ENSRNOG00000019430	Coro1a	-1.24907	9.97148e-20	-1.33027	6.21536e-22	-0.165949	0.351877	-0.429407	0.00725919
ENSRNOG00000042245	Dcaf7	0.675985	1.03257e-19	0.349248	7.05801e-06	1.01987	2.54114e-41	0.525001	9.2322e-12
ENSRNOG00000012881	Fgl2	2.21031	1.04109e-19	2.58272	7.89635e-25	-0.753005	0.00212675	2.64973	5.15415e-24
ENSRNOG00000034025	Ptprj	-0.602388	1.07881e-19	-0.717913	2.93445e-27	1.24315	1.46661e-64	-0.093901	0.271746
ENSRNOG00000022402	Luzp1	-1.01524	1.07963e-19	-0.54609	3.26241e-06	-0.735371	1.01244e-10	0.141165	0.330987
ENSRNOG00000019587	Ptprn	-0.625054	1.12042e-19	-0.140273	0.0818186	0.261727	0.000365763	-0.612113	1.6026e-18
ENSRNOG00000056940	Cited2	1.11296	1.12367e-19	1.50465	2.10619e-33	2.09378	6.79037e-57	1.65288	2.73576e-37
ENSRNOG00000048795	Top2b	0.539034	1.12504e-19	0.590441	8.68798e-23	1.15534	1.08317e-77	0.736743	4.66089e-33
ENSRNOG00000002013	Sidt1	-1.92626	1.1474e-19	-1.1406	2.17358e-07	1.27687	1.30054e-08	1.30603	1.12346e-08
ENSRNOG00000028266	Lrrc55	1.12127	1.16677e-19	1.85928	1.21771e-45	2.23019	9.13005e-55	2.62133	3.0376e-65
ENSRNOG00000011320	Igfbpl1	4.49671	1.22185e-19	2.08548	3.79019e-07	2.86581	1.834e-10	0.481192	0.303858
ENSRNOG00000012083	St6galnac2	2.84517	1.24406e-19	3.50396	2.29489e-26	3.10293	5.92969e-21	3.04845	7.26969e-20
ENSRNOG00000001184	Pknox1	1.18973	1.28179e-19	1.27073	2.59852e-21	0.958014	1.58968e-12	0.525875	0.000188573
ENSRNOG00000007367	Sept4	-0.995782	1.28179e-19	-0.605065	1.0899e-07	-1.51447	1.95736e-44	-0.710329	3.63492e-10
ENSRNOG00000025980	LOC691418	5.51426	1.31522e-19	4.81271	1.96938e-16	4.8029	3.8756e-15	5.27902	1.96845e-16
ENSRNOG00000029980	Zbtb16	-1.48801	1.33339e-19	-1.76925	3.47035e-27	0.807334	3.63216e-05	0.808609	6.14433e-05
ENSRNOG00000016265	Acsl5	-1.27744	1.37022e-19	-1.73997	1.23779e-35	-0.55109	0.000313411	-0.656107	2.06221e-05
ENSRNOG00000052424	RGD1306556	-0.841257	1.38179e-19	-1.58995	1.74454e-68	0.930273	1.56499e-19	0.11231	0.371233
ENSRNOG00000014048	Cyld	-0.868552	1.46403e-19	-1.00106	2.38075e-25	-0.0844894	0.51151	-2.39123	1.94008e-146
ENSRNOG00000020485	Vav3	2.09168	1.55901e-19	-0.709355	0.00272699	0.873087	0.000221239	-0.362587	0.170687
ENSRNOG00000014000	Kif2a	0.838465	1.56198e-19	0.443536	4.37955e-06	0.611724	1.21644e-10	1.04594	1.5311e-27
ENSRNOG00000052725	Shisal1	1.34321	1.68224e-19	0.839359	3.8518e-08	0.198406	0.256514	1.33364	1.07661e-18
ENSRNOG00000018385	Chrm1	-1.13253	1.82816e-19	-1.19365	3.0023e-21	5.63618	8.11654e-63	-0.851161	8.48163e-11
ENSRNOG00000003407	Ptpn14	2.32184	1.84117e-19	2.61203	3.89049e-23	3.2463	5.56618e-31	3.3254	3.5755e-31
ENSRNOG00000004226	Irak3	1.74765	2.08232e-19	2.44685	5.59581e-33	0.948073	1.70665e-06	2.45395	5.44018e-30
ENSRNOG00000007546	Asns	-0.869418	2.09271e-19	-1.34231	2.38175e-45	-0.357394	0.000891884	-0.536929	3.70198e-07
ENSRNOG00000027098	Sez6l2	-0.9005	2.1212e-19	-1.06416	1.35217e-26	0.164681	0.159751	-0.286685	0.0102749
ENSRNOG00000015753	Epn1	-0.753887	2.15756e-19	-0.461281	1.14334e-07	0.367099	4.30866e-05	-0.126511	0.226924
ENSRNOG00000015049	Scn5a	3.27491	2.1947e-19	3.53492	1.90535e-20	2.29604	2.02714e-10	1.40039	0.000113242
ENSRNOG00000005669	Car8	-1.64594	2.1947e-19	0.222217	0.404815	-0.0271214	0.931012	-1.35247	2.99531e-12
ENSRNOG00000003840	Slit2	-1.38834	2.19999e-19	-1.67418	1.21419e-27	-1.12142	9.93552e-13	0.0391744	0.878449
ENSRNOG00000028658	Olig2	-1.13888	2.2718e-19	-0.96005	1.64839e-13	-1.99099	4.83208e-58	-0.937188	2.86353e-12
ENSRNOG00000019306	Syt12	-1.27621	2.30832e-19	-0.603987	7.09737e-05	-0.307996	0.0591866	-1.29346	2.55727e-19
ENSRNOG00000005058	Lpcat4	-1.02766	2.52185e-19	-0.129309	0.395277	0.192058	0.166821	-1.01615	2.69463e-18
ENSRNOG00000023338	Tspan2	-1.62355	2.53573e-19	-1.50744	1.12517e-16	-2.50318	4.18482e-45	-1.9744	4.96245e-28
ENSRNOG00000012789	Mlnr	-4.21997	2.57564e-19	-2.50953	4.59411e-07	-4.44735	1.98921e-21	-1.49789	0.0069978
ENSRNOG00000007583	Pygb	-0.74887	2.61453e-19	-0.514763	2.03532e-09	-1.41992	1.80156e-67	-0.180492	0.0663982
ENSRNOG00000014007	Gfod1	-1.27969	2.74064e-19	-1.48334	2.20879e-25	0.780517	3.0869e-06	-0.160799	0.41434
ENSRNOG00000061073	Zfp275	0.918677	2.74527e-19	0.996417	2.36186e-21	0.797832	1.11626e-13	0.418581	0.000169406
ENSRNOG00000002916	Car4	-2.35072	2.74543e-19	-1.23	9.42873e-06	-0.344233	0.292197	-0.408195	0.222278
ENSRNOG00000051993	Gdf10	2.61876	2.78297e-19	0.125435	0.74928	3.01235	4.24114e-20	2.24473	3.74531e-13
ENSRNOG00000018950	Fa2h	-1.58414	2.80138e-19	-1.3828	1.28362e-14	-4.80598	2.15088e-176	-1.70183	1.4488e-21
ENSRNOG00000015380	Jup	1.01123	3.0324e-19	1.13194	4.02957e-23	0.336461	0.00522291	0.527018	1.03089e-05
ENSRNOG00000027938	Jcad	-1.22606	3.22101e-19	-0.0718619	0.724969	0.0489552	0.801659	-2.32317	5.56343e-67
ENSRNOG00000014310	Tmtc4	1.0716	3.41646e-19	0.535	1.57441e-05	0.193505	0.157184	1.33381	2.0684e-24
ENSRNOG00000002051	Synj1	-0.578025	3.73782e-19	-0.831597	1.4043e-38	0.22188	0.0014081	-0.267675	0.000113693
ENSRNOG00000004050	Snrk	0.896801	3.78945e-19	0.999764	8.96284e-23	1.1857	3.98544e-30	0.954097	6.9739e-20
ENSRNOG00000012480	Pxylp1	1.21445	3.7909e-19	0.99669	5.56492e-13	2.69342	5.62256e-56	1.21095	1.0761e-16
ENSRNOG00000018687	Fbxw2	-0.827837	4.39751e-19	-0.539263	2.82713e-08	-0.18499	0.0944496	-0.49564	8.58729e-07
ENSRNOG00000022636	Alpk1	-1.26045	4.45044e-19	-0.803405	6.04148e-08	0.442918	0.00903883	-0.87772	5.26476e-09
ENSRNOG00000012874	Rgma	-1.15892	4.54521e-19	-0.952973	8.13548e-13	-0.98697	1.31074e-13	-1.06827	1.71606e-15
ENSRNOG00000008939	Nxph1	1.06228	4.68444e-19	0.913445	4.93209e-14	0.672456	4.78725e-08	0.908511	4.4818e-13
ENSRNOG00000015383	Asxl3	1.7141	4.72737e-19	2.06636	1.10695e-25	2.59684	2.03018e-35	2.55311	1.21883e-33
ENSRNOG00000004061	Pnn	0.651288	4.75058e-19	0.443733	3.24164e-09	0.914359	2.10934e-34	0.556979	1.94338e-13
ENSRNOG00000049219	Rnf187	-0.654563	4.87135e-19	-0.487956	8.73215e-11	-0.249801	0.00153077	-0.276286	0.000574611
ENSRNOG00000021524	Mrap	5.27002	4.89072e-19	5.35737	1.91118e-18	4.17822	2.62146e-13	5.55622	8.75515e-18
ENSRNOG00000048782	Wnt7a	1.08426	5.08106e-19	0.905617	2.8639e-13	0.662957	1.62361e-07	0.373579	0.00539966
ENSRNOG00000020889	Nucb1	-0.702821	5.08106e-19	-0.412913	5.33016e-07	-0.970753	2.67938e-35	-0.252854	0.00402829
ENSRNOG00000011329	Pkm	-0.613567	7.22349e-19	-0.38485	7.08028e-08	-0.450409	1.24778e-10	-0.477487	1.46053e-11
ENSRNOG00000005410	Cdca7l	3.41094	7.40105e-19	2.22757	4.09569e-10	2.17722	3.4492e-09	1.58673	1.32426e-05
ENSRNOG00000058645	Tnc	2.23524	8.00526e-19	1.18687	5.04448e-06	0.985613	0.000146	0.491029	0.0894016
ENSRNOG00000028733	Prkar1b	-0.987386	8.73995e-19	-0.988514	1.23267e-18	-0.398045	0.000815996	-0.271279	0.0353631
ENSRNOG00000002549	Htr5b	4.55543	8.83506e-19	-1.11621	0.00170529	3.67273	4.37048e-13	3.93077	2.58072e-13
ENSRNOG00000010984	Anxa11	-1.28037	9.72722e-19	-1.36559	4.69433e-21	0.156833	0.38799	0.250762	0.160289
ENSRNOG00000023085	Pmel	2.28941	1.02872e-18	1.69491	5.88433e-11	0.990483	0.000144085	1.88825	4.26844e-12
ENSRNOG00000016965	Anapc1	0.836845	1.07521e-18	0.735473	1.95637e-14	0.802111	7.68921e-17	0.65507	2.33015e-11
ENSRNOG00000030680	Ddx5	0.587878	1.14067e-18	0.39573	6.87103e-09	0.987258	3.77789e-50	-0.028886	0.769319
ENSRNOG00000002061	Ptpn13	1.09954	1.16626e-18	0.969914	2.06609e-14	0.718696	2.31965e-08	1.07717	2.34955e-16
ENSRNOG00000004810	Plcb1	-1.05118	1.23997e-18	-0.764951	3.39272e-10	1.36763	4.0976e-29	-1.28333	3.67951e-27
ENSRNOG00000032329	AABR07029269.1	1.88465	1.33549e-18	4.00752	2.32517e-45	2.49626	1.29143e-24	4.52611	3.91112e-37
ENSRNOG00000060103	Bex4	2.58552	1.34418e-18	1.46256	1.16529e-07	1.90677	1.85641e-10	0.437451	0.155271
ENSRNOG00000016707	Casp2	1.12337	1.4397e-18	1.18349	1.48669e-19	1.32659	1.91762e-22	0.978679	5.81854e-13
ENSRNOG00000017550	Fbln7	3.17527	1.45724e-18	2.52365	5.41157e-13	2.81332	1.49832e-13	2.99274	6.64469e-14
ENSRNOG00000018111	Slc12a5	-0.82465	1.46704e-18	-0.401647	5.08019e-05	0.322588	0.00130385	-0.569271	3.9955e-09
ENSRNOG00000060168	Prkx	1.19866	1.51216e-18	0.710809	3.0757e-07	0.113967	0.496446	0.606356	3.65174e-05
ENSRNOG00000024808	Stk39	0.908714	1.53246e-18	1.18968	2.99484e-30	0.125797	0.308985	1.4667	3.31489e-43
ENSRNOG00000010650	Plekhh1	-1.37667	1.60393e-18	-1.38775	1.30201e-18	-3.36576	1.1311e-108	-1.4889	4.1841e-21
ENSRNOG00000002949	Pgs1	-0.97656	1.67003e-18	-1.08776	2.60353e-22	-1.04146	6.25535e-20	-0.758723	2.24012e-10
ENSRNOG00000000967	Aacs	-1.11342	1.68105e-18	-1.0717	8.82584e-17	-2.24604	2.53826e-74	-0.470048	0.00123842
ENSRNOG00000053542	AABR07067469.1	-5.90928	1.75094e-18	-3.79723	5.97807e-08	-1.01009	0.23461	0	1
ENSRNOG00000020684	Vat1	1.04029	1.75962e-18	1.32291	1.73247e-27	-1.41436	7.14763e-37	0.573721	5.48789e-06
ENSRNOG00000047756	Mef2a	0.896192	1.77757e-18	0.535144	3.96801e-07	1.91272	6.29173e-75	0.334362	0.00261695
ENSRNOG00000003073	Gpr161	2.36573	1.82076e-18	-0.972344	0.000266633	1.74064	2.01919e-10	0.774427	0.00688646
ENSRNOG00000024213	Golim4	0.801912	1.84995e-18	1.1366	9.60794e-34	0.343938	0.000378851	0.990575	2.23336e-24
ENSRNOG00000052486	Kcna6	-1.62129	2.0378e-18	-1.5637	4.68663e-17	-3.31572	2.61991e-75	-1.72329	1.91574e-20
ENSRNOG00000012482	Ndrg4	0.458154	2.0507e-18	0.416979	2.7286e-15	1.03618	3.8375e-89	0.205257	0.000233192
ENSRNOG00000021497	Akt3	-0.936886	2.07265e-18	-1.15356	2.8702e-27	-0.285092	0.0164008	-0.599464	1.08413e-07
ENSRNOG00000024837	Tpte2	-5.12844	2.08025e-18	-1.95059	0.0032997	0.137669	0.891562	-1.94056	0.00424328
ENSRNOG00000021573	Dpy19l3	-0.687241	2.13568e-18	-1.39521	6.59229e-74	-0.705389	6.37125e-19	-2.09233	1.16915e-166
ENSRNOG00000029784	Pak1	-0.860104	2.31379e-18	0.294665	0.0066315	0.408925	7.26902e-05	0.98109	1.76813e-22
ENSRNOG00000033059	Galnt6	-1.7956	2.38304e-18	-1.92492	1.13368e-20	-3.40569	3.9189e-66	-2.06155	4.64577e-23
ENSRNOG00000039649	Lnp1	3.76793	2.48936e-18	0.569462	0.159226	4.28608	9.0227e-17	2.17323	9.11827e-08
ENSRNOG00000000281	Prodh1	-1.07337	2.55383e-18	-0.794193	3.56736e-10	-0.196858	0.185254	-0.302471	0.037049
ENSRNOG00000005513	Srsf5	0.463928	2.55383e-18	0.278333	4.54906e-07	0.751893	4.4853e-43	0.117441	0.0580344
ENSRNOG00000033663	P4ha2	1.29198	2.70801e-18	0.958954	1.98952e-10	2.52005	9.45102e-54	1.57263	4.18768e-24
ENSRNOG00000048981	Ahsa1	-0.612876	2.75622e-18	-0.667419	7.62054e-21	-0.755186	1.89174e-25	-0.340331	2.25923e-05
ENSRNOG00000050706	Col25a1	-1.97	2.86521e-18	-3.40538	2.93829e-54	-0.831071	0.00100696	-2.51826	7.00076e-29
ENSRNOG00000002823	Mapk9	-0.790857	2.86521e-18	-0.315585	0.00129663	0.0425309	0.734543	-0.0482361	0.714754
ENSRNOG00000007778	Alox15b	4.85704	3.02471e-18	4.689	9.55382e-17	4.64178	2.84436e-15	4.2499	1.91856e-13
ENSRNOG00000018745	Sgsm3	-0.832062	3.13264e-18	-0.352084	0.000898355	0.0632927	0.647943	-0.851161	1.28876e-17
ENSRNOG00000016962	Neu2	-3.20797	3.15268e-18	-0.818856	0.0841122	0.408263	0.503631	-5.01926	2.50171e-44
ENSRNOG00000045771	Chl1	-1.0838	3.19949e-18	-2.34629	1.46759e-83	-0.371217	0.00668885	-1.85415	1.48134e-51
ENSRNOG00000045779	AABR07039210.2	1.14487	3.2165e-18	0.985244	1.62496e-13	1.95783	2.93059e-44	0.0488506	0.803955
ENSRNOG00000015155	Tnnc2	-3.85472	3.21848e-18	-1.58067	0.00113194	-2.69316	2.56321e-09	-1.51283	0.00224275
ENSRNOG00000003028	Dnah17	2.51804	3.25207e-18	2.16576	9.48176e-14	2.86391	6.30852e-19	2.45845	5.67532e-15
ENSRNOG00000057161	AABR07027407.1	-1.31712	3.39805e-18	-1.70598	5.77664e-30	0.228542	0.286835	1.6096	4.76103e-12
ENSRNOG00000030034	Sox11	2.39991	3.40594e-18	2.13245	1.93364e-14	4.20966	1.30346e-25	0.500869	0.0907353
ENSRNOG00000051816	Tigar	-1.10653	3.4615e-18	-0.976274	6.2465e-14	-0.760811	1.38786e-08	-0.238527	0.14418
ENSRNOG00000033087	Cdh23	2.32052	3.59629e-18	1.705	1.31992e-10	0.70971	0.00871552	1.68445	1.40418e-09
ENSRNOG00000039091	Pnpla8	-0.655687	3.62862e-18	-0.492407	1.74165e-10	-0.301643	0.000142657	-0.295384	0.000290529
ENSRNOG00000001055	Rilpl1	-1.03264	3.70095e-18	-0.517272	5.52013e-05	-0.76185	7.66847e-10	0.081502	0.652063
ENSRNOG00000013535	Cdh6	-0.951972	3.71707e-18	0.94174	1.5031e-14	0.450643	0.000365255	-0.123571	0.412251
ENSRNOG00000004281	Cobl	-2.10572	3.75227e-18	-0.199359	0.550904	0.850407	0.00118635	-2.20558	1.04895e-19
ENSRNOG00000020763	Snrnp70	0.516079	4.0661e-18	0.49222	2.46296e-16	1.37084	7.63499e-114	0.459724	4.35788e-14
ENSRNOG00000008001	Rab3b	1.9361	4.20221e-18	2.11925	5.139e-21	1.96688	2.93506e-18	1.50699	4.43592e-11
ENSRNOG00000001996	Ythdc1	0.641259	4.31266e-18	0.545864	4.5619e-13	0.805862	7.08821e-26	0.445188	1.26009e-08
ENSRNOG00000012415	Mpc1	-0.68633	4.48706e-18	-0.212716	0.0189811	-0.802269	1.40225e-23	-0.321053	0.000286139
ENSRNOG00000006178	Dync1h1	-0.57089	4.89717e-18	-0.341976	5.68887e-07	0.0733445	0.363586	-0.451426	2.02619e-11
ENSRNOG00000001829	Ube2v2	-0.654505	5.20136e-18	-0.633632	2.01909e-16	-0.956974	2.4311e-36	-0.423242	3.17135e-07
ENSRNOG00000060550	Epn2	-0.613972	5.39905e-18	-1.08175	3.45441e-54	-0.411448	2.13067e-08	-0.913419	6.9463e-38
ENSRNOG00000002860	Ccdc181	-0.795632	5.41279e-18	-0.961882	1.98406e-25	-0.771544	1.06799e-15	-0.693196	2.64503e-12
ENSRNOG00000002122	Lrrc8c	-1.30124	5.70223e-18	-0.666247	3.44901e-05	-1.38566	4.73738e-20	-1.32108	6.33197e-18
ENSRNOG00000012850	Kat6b	0.795408	5.78947e-18	0.803033	6.91857e-18	1.6223	2.41125e-63	0.670566	2.16341e-12
ENSRNOG00000014366	Shc3	-1.28164	5.91051e-18	-0.86751	1.49165e-08	0.217645	0.229088	-1.22884	3.27705e-16
ENSRNOG00000014834	Epc1	0.826396	5.93457e-18	0.687825	2.01636e-12	1.04174	1.1752e-24	0.663691	7.57593e-11
ENSRNOG00000019751	Cyb5r2	1.85991	5.94691e-18	1.71191	6.60746e-15	0.0950032	0.727207	1.45573	2.3992e-10
ENSRNOG00000016645	Sfmbt1	0.795103	5.97337e-18	0.563262	2.53647e-09	0.870489	5.22871e-19	0.498222	5.24587e-07
ENSRNOG00000016145	Strn4	-0.714861	5.98639e-18	-1.05766	3.55769e-38	0.381568	2.03918e-05	-0.677129	1.32128e-15
ENSRNOG00000039464	Tmem229a	-0.825376	6.0916e-18	-0.694523	9.04302e-13	-1.46778	4.15175e-55	-0.440114	1.62964e-05
ENSRNOG00000019145	Kdm2a	0.485104	6.34939e-18	0.403858	2.1456e-12	0.83486	1.13095e-45	0.371193	4.58626e-10
ENSRNOG00000007242	Ehmt1	0.695553	6.41279e-18	0.603776	3.17801e-13	1.03382	1.32265e-30	0.62398	1.79731e-12
ENSRNOG00000002660	Magee1	-0.818712	6.69508e-18	-0.736063	2.95738e-14	-0.703323	6.57214e-13	-0.631182	3.24744e-10
ENSRNOG00000045636	Fasn	0.584805	6.71549e-18	0.298001	2.83494e-05	-0.454576	2.08688e-11	0.437243	4.00229e-10
ENSRNOG00000014876	Lpin2	0.904004	6.87909e-18	0.668786	4.07149e-10	1.71436	8.3762e-58	1.42036	3.16508e-40
ENSRNOG00000021242	Adam33	-3.15672	6.95488e-18	2.07592	7.00112e-05	1.42518	0.0061581	1.51524	0.00541519
ENSRNOG00000018870	Hapln2	-1.67663	7.05359e-18	-1.70672	2.76359e-18	-4.1944	1.91768e-110	-1.85801	2.65541e-21
ENSRNOG00000008447	Tmem132d	-1.52781	7.31523e-18	0.565765	0.00513548	1.91313	1.56896e-20	0.541972	0.00932978
ENSRNOG00000028366	Gphn	0.641419	7.43046e-18	0.523839	5.89874e-12	0.693817	2.26275e-19	0.00772058	0.952388
ENSRNOG00000001452	Fzd9	-1.87143	7.53276e-18	-1.76657	1.98973e-15	-1.4787	1.86215e-10	-0.874596	0.000844945
ENSRNOG00000002609	Ero1b	0.868403	7.94477e-18	0.609169	3.96299e-09	0.64013	1.05494e-09	0.560759	1.86313e-07
ENSRNOG00000011841	Map2	-0.724637	8.26125e-18	-0.472456	4.8287e-08	0.742735	8.79993e-19	0.280887	0.00205227
ENSRNOG00000011413	Scp2	-0.482099	8.36897e-18	0.0618491	0.416943	-0.233666	0.000128654	-0.196064	0.00227836
ENSRNOG00000009740	Slco1c1	-1.1702	8.71662e-18	-0.792202	1.72451e-08	-0.19715	0.227302	-0.938654	1.92457e-11
ENSRNOG00000009080	Atp6v1d	-0.628932	8.91521e-18	-0.61771	6.69351e-17	-0.203204	0.0120762	-0.720888	2.70298e-22
ENSRNOG00000002841	Cdc42bpa	-0.796915	9.14075e-18	-0.532316	2.54944e-08	-0.406289	2.48083e-05	-0.294888	0.00385229
ENSRNOG00000028097	Slc7a14	-1.35841	9.31238e-18	-2.66005	7.35847e-68	-1.29943	1.01479e-15	-2.06225	1.98475e-39
ENSRNOG00000014775	Nol4	0.767351	9.42284e-18	0.681874	7.19221e-14	2.93996	7.91833e-143	1.12422	3.14278e-32
ENSRNOG00000016016	Zmat2	-0.665881	9.49542e-18	-0.720944	3.27726e-20	-0.302478	0.000363369	-0.466226	2.24155e-08
ENSRNOG00000003694	Prox1	-1.67414	9.79083e-18	-4.8272	7.30948e-148	-3.65748	2.45083e-84	-1.74109	2.26547e-18
ENSRNOG00000038365	Plekha2	1.254	1.03549e-17	2.04297	6.70381e-44	3.77031	3.20072e-121	2.99763	5.90651e-84
ENSRNOG00000052549	Chga	-0.990104	1.06229e-17	-0.567759	2.72769e-06	-1.31372	1.67899e-30	-0.177846	0.21703
ENSRNOG00000008054	Igsf9	2.22688	1.0731e-17	2.41795	1.53784e-18	2.50396	4.52317e-17	-0.510687	0.0475518
ENSRNOG00000060773	Sertad4	1.62815	1.09737e-17	1.52828	1.95866e-15	2.18202	1.8635e-28	0.360355	0.10083
ENSRNOG00000000888	Sbds	-0.590872	1.10553e-17	-0.430431	3.23778e-09	-1.46254	1.14861e-105	-0.57592	1.01068e-14
ENSRNOG00000010646	Tmem229b	-0.926733	1.11285e-17	-0.212799	0.103181	-1.25057	4.72581e-31	0.273852	0.0411281
ENSRNOG00000000248	Srsf2	0.61095	1.14883e-17	0.369276	6.00067e-07	0.445086	1.35165e-09	0.290416	0.000161778
ENSRNOG00000021795	Fam227a	1.44668	1.15804e-17	0.508276	0.00489317	1.6622	4.33911e-21	0.526338	0.00410708
ENSRNOG00000006595	Htr3a	1.86231	1.20094e-17	0.97728	3.06249e-06	0.919527	2.62448e-05	-0.360344	0.0996323
ENSRNOG00000050206	Shank2	-1.05756	1.2798e-17	-0.6736	2.24733e-07	2.01988	1.74894e-34	0.0715605	0.709985
ENSRNOG00000020867	Numbl	-0.796789	1.40975e-17	-0.73119	1.38458e-14	1.37505	9.06864e-36	-0.498634	7.00853e-07
ENSRNOG00000038328	Gjc2	-1.85065	1.51655e-17	-1.57385	1.21534e-12	-4.43918	3.50062e-100	-1.98272	1.79594e-19
ENSRNOG00000000840	Atp6v1g2	-0.90172	1.55439e-17	-0.402808	0.000362781	0.0688115	0.621989	-0.10152	0.467956
ENSRNOG00000010609	Abcf2	-0.480887	1.67607e-17	-0.193725	0.00214969	-0.127819	0.0593631	-0.32143	2.82108e-07
ENSRNOG00000002864	Nacc1	-0.582452	1.6945e-17	-0.369837	2.28862e-07	-0.0495654	0.590074	-0.164806	0.0413571
ENSRNOG00000051905	Wnt2	-4.19062	1.71752e-17	-4.93881	5.5599e-24	-1.30809	0.0262811	-2.49616	3.17059e-06
ENSRNOG00000056246	Gls	-0.527559	1.73448e-17	-0.450855	7.89432e-13	0.717194	3.35297e-29	-0.174053	0.0126846
ENSRNOG00000013837	Tp53bp1	0.575083	1.75295e-17	0.510558	9.96335e-14	0.909368	9.87738e-40	0.3683	2.18217e-07
ENSRNOG00000004049	Baiap2	-0.558666	1.76889e-17	-0.41661	8.1028e-10	2.74169	1.06775e-190	-1.41094	6.14245e-107
ENSRNOG00000047686	Pou3f1	-2.04918	1.80332e-17	-3.42532	7.54935e-49	-0.273655	0.419419	-3.73003	1.5742e-57
ENSRNOG00000018529	Csnk1g2	-0.93898	1.82964e-17	-0.557765	1.52898e-06	-0.386319	0.00122206	-0.692277	2.06972e-09
ENSRNOG00000018486	RGD1311084	-2.99702	1.87183e-17	-3.2024	1.22905e-19	-0.37741	0.469074	-2.24685	2.54844e-09
ENSRNOG00000038980	Lypd6	-1.90094	1.91714e-17	-1.4663	1.72386e-10	0.768112	0.00422363	-0.960052	8.52207e-05
ENSRNOG00000007290	Atp1a2	-0.747877	1.91817e-17	-0.257068	0.0076831	-0.581719	4.57003e-11	0.063722	0.596133
ENSRNOG00000003078	Dcaf6	-0.478279	1.93077e-17	-0.202041	0.00111425	0.922907	6.56733e-46	-0.167796	0.0112077
ENSRNOG00000046947	LOC365985	-1.24808	2.01062e-17	-1.86612	6.30115e-38	-0.309414	0.0629705	-0.384688	0.0215675
ENSRNOG00000031100	Klhl1	2.49586	2.01534e-17	3.75215	1.60256e-24	-0.291421	0.333259	3.94717	2.97196e-20
ENSRNOG00000003276	Myo1d	-1.07302	2.03284e-17	-1.00871	4.25128e-15	-3.44882	6.25308e-182	-1.12487	5.07686e-18
ENSRNOG00000008424	Aagab	-0.936446	2.10834e-17	-0.747779	8.0463e-11	-0.0796677	0.623798	-0.140744	0.376918
ENSRNOG00000002139	RGD1311575	0.888322	2.12862e-17	0.17403	0.162496	0.391021	0.000349383	0.445845	5.92766e-05
ENSRNOG00000017108	Syngr1	-0.809588	2.33586e-17	-0.626109	2.00145e-10	0.447567	3.14513e-05	0.0989351	0.459696
ENSRNOG00000019851	Cox6a2	-4.16848	2.37315e-17	-0.645089	0.365273	-3.2112	2.68809e-10	-0.539743	0.482152
ENSRNOG00000019048	Sod2	-0.5787	2.57667e-17	-0.515859	1.86216e-13	-1.24649	5.31897e-77	-0.441528	1.9449e-09
ENSRNOG00000016924	Acly	-0.487274	2.71045e-17	-0.496837	1.37186e-17	-1.6251	1.4247e-187	-0.592738	4.95699e-24
ENSRNOG00000002456	Hlf	-1.5396	2.75583e-17	-0.563537	0.00492721	1.52707	1.83519e-14	-1.09934	5.24803e-09
ENSRNOG00000011308	Uhrf2	0.625943	2.77809e-17	0.450398	3.25269e-09	1.03137	2.88144e-39	0.316249	8.56326e-05
ENSRNOG00000017690	Ccsap	1.0212	2.85757e-17	0.631755	3.59328e-07	2.15219	8.02324e-52	0.0853533	0.604189
ENSRNOG00000042788	AABR07006480.1	3.51715	2.93243e-17	3.32877	2.93461e-15	-0.441621	0.198352	4.08948	9.56812e-15
ENSRNOG00000001593	Lnpk	-0.887623	3.01379e-17	-0.716524	4.13058e-11	-0.66275	2.0463e-09	-0.49427	2.3657e-05
ENSRNOG00000024923	Nnat	2.38869	3.47985e-17	0.0668555	0.884945	-0.0964991	0.806224	0.714444	0.0234692
ENSRNOG00000047457	AABR07071765.1	-3.85132	3.52974e-17	-3.04163	1.14477e-10	-0.109898	0.893674	-2.13446	2.88219e-05
ENSRNOG00000047401	Gfy	5.36171	3.58308e-17	5.02987	2.54063e-15	4.17033	1.62214e-11	4.84889	1.39974e-13
ENSRNOG00000010881	Trak2	0.699285	3.78724e-17	0.711163	1.45038e-17	-0.437759	1.91632e-07	0.255154	0.00484829
ENSRNOG00000011441	Tpd52	-1.14995	3.80332e-17	-1.1721	1.45986e-17	-2.22344	1.46534e-62	-1.33448	2.85627e-22
ENSRNOG00000014614	Cxxc1	0.791398	3.9791e-17	0.835141	4.25655e-18	1.12886	8.66455e-29	0.84619	5.98736e-17
ENSRNOG00000050323	Srsf1	0.606937	4.1692e-17	0.366571	9.58603e-07	0.602905	1.71402e-16	0.169064	0.0402197
ENSRNOG00000018850	Ttc9b	-1.90983	4.1692e-17	-0.822858	0.000927992	0.549841	0.0470026	-0.74566	0.00364801
ENSRNOG00000009040	Gas2l1	-1.18105	4.28402e-17	-0.718723	1.61025e-06	-0.937034	1.78973e-10	-0.353814	0.0406879
ENSRNOG00000020393	Rhog	-0.890704	4.33136e-17	-0.689017	4.87726e-10	-2.9092	4.56936e-189	-0.783817	5.50238e-12
ENSRNOG00000023601	Elavl4	-1.59622	4.63009e-17	-1.13016	6.85221e-09	-0.218595	0.349697	0.285058	0.232723
ENSRNOG00000021380	Fads6	-0.969882	4.63411e-17	-0.459951	0.000326128	-0.659076	1.22098e-07	-0.656084	2.83473e-07
ENSRNOG00000056009	Rab11fip5	-0.905739	4.86868e-17	-0.587565	1.71964e-07	-0.491934	1.48229e-05	-0.4083	0.00059268
ENSRNOG00000017724	Sf3b3	0.676809	4.93514e-17	0.284085	0.00096027	0.984922	1.65808e-30	0.0171279	0.89381
ENSRNOG00000015157	Smtnl2	3.06475	5.04688e-17	2.53495	6.22449e-13	-1.49307	9.15628e-09	2.54341	1.00088e-10
ENSRNOG00000005705	Qpct	2.34071	5.06973e-17	0.838365	0.001024	-0.366428	0.154315	-0.656734	0.00671069
ENSRNOG00000027341	Tenm2	-1.24721	5.18859e-17	-1.88463	9.50628e-38	0.902893	7.54502e-09	-1.52614	7.90307e-25
ENSRNOG00000054764	Flt3	-1.65883	5.27906e-17	-0.808888	0.00020012	-1.93054	2.23939e-22	0.811436	0.00229697
ENSRNOG00000060961	AABR07070246.1	-2.16818	5.28613e-17	-1.78601	2.32819e-11	-0.305746	0.397225	-0.24479	0.543811
ENSRNOG00000016974	AABR07068351.1	-0.596923	5.50006e-17	-0.807422	5.12862e-30	0.261117	0.00137951	-1.45695	5.57995e-97
ENSRNOG00000059968	Jak2	0.977636	5.53102e-17	1.14383	2.671e-22	1.57421	2.50509e-39	0.637949	1.64319e-07
ENSRNOG00000010592	Slc25a27	0.754202	5.5316e-17	0.79682	3.67239e-18	0.594986	1.86621e-10	0.798858	4.40394e-17
ENSRNOG00000014816	Slc1a1	0.732149	5.56555e-17	-0.0668805	0.575159	1.52656	5.71897e-64	0.656065	3.40803e-13
ENSRNOG00000017118	P4ha3	-4.14254	5.73482e-17	-1.23272	0.0365233	-0.912858	0.139358	-2.2377	3.42826e-05
ENSRNOG00000001886	Dgcr8	0.643643	5.73829e-17	0.574109	3.7178e-13	0.714446	6.75308e-18	0.389235	4.21438e-06
ENSRNOG00000009613	Sh3bgrl2	1.34053	5.77229e-17	1.41292	2.01319e-17	1.22382	1.22202e-12	0.765844	8.61987e-06
ENSRNOG00000004132	Lasp1	-0.851758	5.95995e-17	-0.200106	0.0946549	0.320171	0.00388487	0.0840608	0.549435
ENSRNOG00000003785	Usp43	-3.44791	6.17337e-17	-1.95356	1.08366e-05	0.0391917	0.959155	-0.711798	0.204997
ENSRNOG00000004198	Stxbp6	1.19152	6.74253e-17	0.728135	7.40164e-07	1.6955	2.51619e-31	2.26592	2.39698e-51
ENSRNOG00000000885	LOC100362819	1.1858	6.77209e-17	0.258	0.118247	1.41975	1.32309e-22	0.232585	0.169268
ENSRNOG00000003328	Cdip1	-0.551162	7.98034e-17	-0.885673	5.43522e-42	-0.781283	3.96527e-32	-0.302124	2.91683e-05
ENSRNOG00000003707	Zmym3	0.637378	8.01062e-17	0.188575	0.0273827	1.01768	1.05643e-38	-0.328777	4.0653e-05
ENSRNOG00000009772	Kirrel3	0.919153	8.39857e-17	0.325061	0.00663086	1.32598	4.99349e-31	-0.0838907	0.573205
ENSRNOG00000001928	Il1rap	-1.27618	8.64435e-17	-1.861	5.23837e-35	-1.76116	5.60606e-31	-0.629205	0.000273901
ENSRNOG00000036592	Zfp518a	1.10222	8.75123e-17	0.928614	6.38382e-12	0.424461	0.0025234	0.517975	0.000301721
ENSRNOG00000001700	Whrn	-1.10638	9.14875e-17	-0.0415209	0.846657	-1.11205	7.55507e-17	0.34008	0.0302437
ENSRNOG00000060410	Pcdh1	-0.728996	9.24941e-17	-1.37392	1.18983e-57	1.03213	2.59914e-28	-0.216586	0.0326823
ENSRNOG00000020640	Zbtb7b	-1.11819	9.36267e-17	-0.598378	5.28778e-05	-1.93255	8.02132e-49	-0.0785694	0.726578
ENSRNOG00000054978	Hist1h1c	1.13022	9.87743e-17	0.858708	6.07169e-10	-0.234621	0.119003	0.740448	2.73417e-07
ENSRNOG00000009812	Sbf2	0.823565	1.01547e-16	0.616681	1.11988e-09	0.788462	4.15109e-15	0.362907	0.000679051
ENSRNOG00000015999	Cirbp	0.798709	1.04731e-16	0.643471	6.14218e-11	0.638312	1.67572e-10	0.554489	6.06432e-08
ENSRNOG00000007099	S100pbp	0.838712	1.05794e-16	0.355379	0.0009207	1.12278	1.32409e-25	-0.17247	0.147244
ENSRNOG00000011451	Lrp3	-0.695269	1.05799e-16	-0.537146	7.11432e-10	-0.518066	5.6836e-09	-0.0917965	0.441023
ENSRNOG00000005093	Lgr6	2.32244	1.06058e-16	2.95289	5.23176e-22	1.88887	6.95862e-11	3.00767	3.3319e-19
ENSRNOG00000009652	Prkci	-0.479577	1.06669e-16	-0.488192	1.17594e-16	-0.306554	1.02843e-06	-0.475634	1.16501e-14
ENSRNOG00000052968	Hnrnpa3	0.617745	1.07094e-16	0.557628	1.45723e-13	0.882629	1.03045e-31	0.614728	8.12361e-16
ENSRNOG00000011352	Furin	0.649023	1.0848e-16	0.748866	1.59333e-20	1.22373	2.11212e-43	0.624094	2.69838e-13
ENSRNOG00000006110	Jph1	-1.98212	1.12247e-16	-3.24738	1.94e-44	0.425232	0.202841	-2.08252	1.46281e-17
ENSRNOG00000018441	Ggt7	-0.768174	1.13459e-16	-0.512621	1.024e-07	-0.0732526	0.550028	0.433605	3.1175e-05
ENSRNOG00000053607	Fam217b	-0.679443	1.13476e-16	-0.63192	4.79091e-14	-0.22202	0.0193473	-0.133083	0.21958
ENSRNOG00000059615	Exoc6b	-0.708988	1.14133e-16	-0.731185	2.1596e-17	-0.958946	2.21344e-29	-0.449435	8.00564e-07
ENSRNOG00000006137	Arid1a	0.437642	1.16402e-16	0.471909	9.72673e-19	0.775996	9.81174e-47	0.135579	0.023969
ENSRNOG00000053040	AC094643.2	-1.18782	1.16402e-16	-0.0644599	0.776436	-1.47243	9.01056e-25	0.411807	0.0223095
ENSRNOG00000017725	Pnlip	-1.98375	1.17089e-16	-1.01007	0.000185154	-1.9186	9.65707e-15	-1.95677	6.09167e-15
ENSRNOG00000017146	Nfatc1	1.24179	1.20148e-16	1.51075	3.2968e-22	1.14505	4.1239e-13	1.73782	1.06691e-24
ENSRNOG00000053200	Dock10	1.13287	1.24103e-16	-0.359633	0.0168146	-0.363393	0.0127259	0.270395	0.0876149
ENSRNOG00000010447	Tmod2	1.0019	1.24435e-16	1.28667	2.16746e-26	1.80694	5.80868e-50	1.45732	6.6754e-33
ENSRNOG00000019630	Hacl1	1.05348	1.2993e-16	0.579675	7.83316e-06	-0.107894	0.478824	-0.220865	0.122921
ENSRNOG00000011667	Fastk	-0.827461	1.33016e-16	-0.248356	0.0307506	0.222823	0.0590334	-0.38896	0.000436067
ENSRNOG00000027487	Trim28	0.512907	1.34802e-16	0.319611	6.93204e-07	0.705972	5.52963e-28	0.404216	7.20811e-10
ENSRNOG00000013321	Dock11	1.15449	1.36041e-16	0.140109	0.427883	-0.294473	0.0477159	0.470057	0.00201496
ENSRNOG00000020337	Sla2	1.80723	1.36746e-16	1.13495	1.53994e-07	3.44054	9.9896e-27	0.94873	3.57134e-05
ENSRNOG00000019671	Rsbn1	0.63678	1.42423e-16	0.627788	1.91349e-15	0.722708	1.26723e-18	0.201706	0.0230252
ENSRNOG00000003590	Tom1l2	-0.544723	1.45948e-16	-0.445664	4.66317e-11	-0.194404	0.00808587	-0.202493	0.00740001
ENSRNOG00000011358	Hipk3	-0.613732	1.47449e-16	0.156222	0.0785132	0.397727	9.47851e-07	-0.356947	8.67795e-06
ENSRNOG00000014064	Ctsh	1.11573	1.49487e-16	1.20592	1.03937e-18	0.226584	0.140284	1.07472	1.15186e-14
ENSRNOG00000026455	Gpd1l	-0.894329	1.50727e-16	-0.761649	5.46307e-12	-0.190544	0.137981	-0.63779	2.2311e-08
ENSRNOG00000038228	Serp2	-1.09927	1.56965e-16	-0.92373	2.05743e-11	0.420163	0.0135889	-0.622586	3.7088e-05
ENSRNOG00000060571	Tmem189	-0.690994	1.65491e-16	-0.743453	2.28848e-18	-2.74715	8.77118e-275	-0.347609	0.000371524
ENSRNOG00000022704	Esyt3	-2.02619	1.66895e-16	-3.51737	2.69227e-49	0.273236	0.440402	-3.23798	3.29137e-41
ENSRNOG00000009982	Pnp	-0.761397	1.73306e-16	-0.724126	1.26866e-14	-0.795676	2.66319e-17	-0.754248	3.29936e-15
ENSRNOG00000049127	Smap1	0.843195	1.7487e-16	0.720458	4.07947e-12	1.62167	2.15702e-53	1.23919	4.31681e-32
ENSRNOG00000014051	Pgrmc2	-0.6155	1.76824e-16	-0.900519	4.45785e-34	-1.12763	3.78328e-52	-0.740884	2.02933e-21
ENSRNOG00000053450	Myadm	-1.20716	1.871e-16	-1.20315	3.84201e-16	-0.599623	0.000114643	-0.340464	0.0488888
ENSRNOG00000009388	Sptssb	-2.34284	1.90406e-16	-0.991636	0.00151888	-1.8135	4.1776e-10	-1.32829	1.37469e-05
ENSRNOG00000018677	Akt2	-0.719656	1.97983e-16	-0.150696	0.1624	0.411471	3.02763e-05	-0.0569694	0.661946
ENSRNOG00000011675	Zfp40	1.09734	1.99014e-16	0.512129	0.000243376	1.14478	2.68958e-16	0.589487	3.68292e-05
ENSRNOG00000010153	Raf1	0.537741	1.99956e-16	0.46927	2.53296e-12	0.732808	4.53296e-26	0.395221	2.07838e-08
ENSRNOG00000008578	Cdk16	-0.799243	2.12232e-16	-0.0248757	0.875897	0.0877431	0.474413	0.175579	0.130932
ENSRNOG00000048043	F2r	-0.985919	2.17373e-16	-0.669305	1.4518e-07	-1.59307	4.31508e-41	-0.822729	1.98093e-10
ENSRNOG00000008051	Itpk1	-1.03053	2.3173e-16	-0.513283	0.000163367	-1.18777	6.09761e-21	-0.420647	0.00349907
ENSRNOG00000012531	Ephb2	-1.75672	2.42791e-16	-2.21654	1.74023e-25	-0.992963	1.45872e-05	0.278809	0.366973
ENSRNOG00000026055	Neurod6	-3.77067	2.77864e-16	-5.40887	1.39628e-32	-0.347142	0.566728	-2.01153	3.68045e-05
ENSRNOG00000027542	LOC100302465	-2.30703	2.77999e-16	-2.28299	1.66228e-15	-2.99856	5.60521e-27	-2.72152	1.84126e-21
ENSRNOG00000061795	Rbm4b	1.22456	2.8169e-16	0.950252	4.40881e-10	0.701355	7.78898e-06	0.764614	2.27639e-06
ENSRNOG00000008298	Dock7	0.618685	2.82659e-16	0.624851	4.62142e-16	0.0121418	0.913681	0.860871	4.28246e-27
ENSRNOG00000021240	Atrn	-0.518843	2.90715e-16	-0.552481	3.72822e-18	-0.828706	4.11175e-40	-0.396065	1.35017e-09
ENSRNOG00000006068	Tmem117	1.10956	2.91421e-16	0.821355	2.89045e-09	-2.48844	9.61155e-102	0.459679	0.00207724
ENSRNOG00000031890	Ncam1	0.694653	2.92176e-16	0.372438	2.78239e-05	-0.0137581	0.912414	0.546572	3.00338e-10
ENSRNOG00000018982	Entpd3	-1.27803	3.02522e-16	0.0660202	0.800569	-1.39249	2.37319e-18	-2.8142	2.63078e-78
ENSRNOG00000007596	Rffl	-1.26848	3.10135e-16	-1.16621	1.38679e-13	-3.36369	8.53134e-113	-1.56914	8.72787e-24
ENSRNOG00000000861	Zic3	1.58978	3.29248e-16	2.14298	3.8667e-25	2.28935	3.29219e-25	1.81856	1.93885e-17
ENSRNOG00000053210	Zc3h11a	0.517021	3.43516e-16	0.434366	1.94461e-11	0.680519	2.07169e-25	0.33357	7.60983e-07
ENSRNOG00000016029	Rb1	0.828982	3.4593e-16	0.325452	0.0028269	-0.172004	0.133213	0.646086	1.74446e-09
ENSRNOG00000025235	Tmem130	0.51664	3.56964e-16	-0.253147	0.000139602	0.301041	4.05668e-06	-0.0604518	0.466481
ENSRNOG00000006587	Setd3	-0.677915	3.63225e-16	-0.442865	3.58092e-07	-0.60713	1.03348e-12	-0.456093	2.83473e-07
ENSRNOG00000016454	Nasp	1.01948	3.69539e-16	0.8359	5.73861e-11	1.24691	2.33452e-21	0.797521	1.53243e-09
ENSRNOG00000017545	Mrs2	0.809268	3.72827e-16	0.506147	8.1701e-07	1.19915	2.80803e-29	0.847823	1.40688e-15
ENSRNOG00000001436	Ywhag	-0.856917	3.74413e-16	-1.06251	2.87815e-24	-0.831973	1.97127e-15	-0.0656552	0.65488
ENSRNOG00000030245	Tango2	-0.733733	3.78334e-16	-0.590013	2.41097e-10	-0.665725	1.06727e-12	-0.284909	0.0069253
ENSRNOG00000020161	Zbtb7a	-0.789362	3.78334e-16	-0.347541	0.00102579	0.0707386	0.593574	-0.633989	4.4199e-10
ENSRNOG00000014829	Prmt3	1.00856	3.84181e-16	0.944365	1.03212e-13	1.27846	5.05574e-21	0.672677	5.06817e-07
ENSRNOG00000033617	Krt26	-2.05062	3.91146e-16	-1.10427	5.66195e-05	-2.25354	4.95403e-19	-2.71501	2.50316e-27
ENSRNOG00000030371	COX2	-0.88509	3.97375e-16	-0.336206	0.0043683	-0.133694	0.301542	-0.745209	1.24239e-11
ENSRNOG00000022386	Opalin	-2.28242	3.99021e-16	-2.23759	1.87468e-15	-2.99238	2.45063e-27	-2.4734	1.08777e-18
ENSRNOG00000002832	Slc16a2	1.27873	4.23504e-16	0.489975	0.00348943	1.57677	7.88663e-22	0.678283	4.7827e-05
ENSRNOG00000018233	Gas6	-0.698951	4.30827e-16	-0.527618	2.75957e-09	-1.00818	4.72244e-32	-0.278991	0.00417356
ENSRNOG00000025155	Lmtk2	-0.702157	4.46311e-16	0.229718	0.0176525	1.18509	2.32477e-41	-0.449494	5.81224e-07
ENSRNOG00000008246	Emilin1	1.83677	4.47399e-16	1.87766	5.46209e-16	1.77778	6.66084e-14	1.45438	9.68367e-10
ENSRNOG00000020875	Celf3	0.691882	4.51242e-16	0.359677	5.71793e-05	3.82331	8.65255e-217	0.297002	0.00138302
ENSRNOG00000020013	Psrc1	-2.31121	4.72559e-16	-1.10767	0.000500208	1.10975	0.00747834	-0.846191	0.0151499
ENSRNOG00000018835	Notch2	1.04387	5.04449e-16	0.403458	0.00360941	0.127467	0.417279	0.70409	1.46237e-07
ENSRNOG00000006559	Akap8	0.746612	5.16785e-16	0.58188	6.2521e-10	1.1112	1.73864e-31	0.672653	2.35089e-12
ENSRNOG00000003538	Adamts4	-1.71622	5.2343e-16	-1.37359	2.29647e-10	-3.98106	2.10395e-84	-1.69635	2.99791e-15
ENSRNOG00000016256	Myo9b	0.632813	5.3409e-16	0.431553	7.87415e-08	-0.00907342	0.938667	0.0837011	0.405816
ENSRNOG00000057284	Cenpb	-0.649589	5.3643e-16	-0.332868	0.000128461	-0.969892	1.45686e-33	-0.50025	6.58037e-09
ENSRNOG00000018895	Mchr1	-1.70869	5.48008e-16	-1.90354	2.09282e-19	-0.194133	0.519993	-2.19737	3.14287e-25
ENSRNOG00000016405	Pcsk4	-2.39866	5.48008e-16	-1.95364	2.07543e-10	0.503584	0.270117	-1.16893	0.000797814
ENSRNOG00000002708	Phf8	0.633947	5.68704e-16	0.557147	3.54786e-12	1.01956	4.60533e-34	0.66411	1.85467e-15
ENSRNOG00000027066	Stk32a	1.65688	5.89359e-16	-0.110104	0.677279	-2.60057	1.29725e-52	-1.60662	1.36083e-19
ENSRNOG00000011502	Col9a2	1.81402	5.91757e-16	1.78379	3.99374e-15	1.94328	2.78845e-17	2.27504	5.12971e-22
ENSRNOG00000020942	Plekha4	2.57686	6.00592e-16	2.44695	4.45842e-14	0.993606	0.00190127	2.65798	1.9712e-14
ENSRNOG00000014722	Raph1	-0.836738	6.02684e-16	0.222981	0.0729671	0.909031	4.19144e-15	0.366351	0.00252962
ENSRNOG00000011052	Gars	-0.539518	6.23742e-16	-0.261972	0.000307527	-0.293	5.08302e-05	-0.193864	0.0137115
ENSRNOG00000018911	Pfkfb3	-0.633924	6.41448e-16	-0.549883	7.95842e-12	-0.41039	7.79638e-07	-0.382519	8.10695e-06
ENSRNOG00000005998	Smoc1	1.8358	6.53998e-16	2.54401	7.59271e-28	1.85528	9.54686e-16	2.57079	6.19658e-27
ENSRNOG00000032490	Cdh7	-1.60129	6.62898e-16	0.0338822	0.922771	-0.628319	0.00413804	-0.769768	0.000462756
ENSRNOG00000030871	Calm2	-0.615382	6.72573e-16	-0.487902	3.29041e-10	0.545699	2.85035e-12	-0.530433	8.77949e-12
ENSRNOG00000015144	Ist1	0.500167	7.31401e-16	0.100495	0.17489	0.350244	8.33621e-08	0.227118	0.000992486
ENSRNOG00000031038	Gtdc1	-0.812822	7.34015e-16	0.00154929	0.995572	0.42465	0.000297121	0.205771	0.116178
ENSRNOG00000061530	Fgf16	3.85295	7.35887e-16	3.75186	1.62983e-14	4.83996	1.50056e-16	1.75014	7.10164e-05
ENSRNOG00000046803	Arhgef16	3.1443	7.50745e-16	2.65445	5.13816e-12	3.81045	5.3455e-16	2.91727	8.21982e-12
ENSRNOG00000013305	Atp2c1	-0.627415	7.87271e-16	-0.742806	1.35967e-21	-0.730362	7.40941e-21	-0.365383	1.12204e-05
ENSRNOG00000016800	Ss18	0.638132	8.80455e-16	0.172217	0.0546282	0.0569843	0.580202	0.714663	9.23932e-17
ENSRNOG00000010737	Mbnl2	-0.628419	8.82487e-16	-0.566343	7.87175e-13	-0.427615	8.75076e-08	-1.04714	6.92373e-42
ENSRNOG00000043286	Cpne2	1.49791	9.15185e-16	0.379033	0.0588618	0.109102	0.638238	-0.0730045	0.779689
ENSRNOG00000025899	Thada	1.10539	9.3936e-16	0.64532	5.7728e-06	0.507352	0.000418435	0.80326	2.60156e-08
ENSRNOG00000027658	Gpr101	3.87523	9.60221e-16	0.331413	0.349579	-0.934563	0.000542714	-3.33919	1.46982e-47
ENSRNOG00000040205	Zcchc24	-0.720516	9.70091e-16	-0.675937	9.15619e-14	-1.2864	2.21391e-48	-0.600338	8.3731e-11
ENSRNOG00000007726	Mcam	-1.03746	1.0167e-15	-0.648338	1.92779e-06	-1.27096	8.12026e-23	-0.998985	6.33551e-14
ENSRNOG00000009281	Commd1	-0.900192	1.04586e-15	-0.597751	7.11749e-07	-0.858764	5.02484e-13	-1.00847	1.81149e-17
ENSRNOG00000018225	Tp53inp2	0.600662	1.06789e-15	0.92157	7.29249e-35	-0.8123	1.22374e-28	0.912109	2.64693e-33
ENSRNOG00000049641	Rab29	-1.08392	1.10361e-15	-1.12571	2.85321e-16	-0.638952	3.16323e-05	-1.02202	3.15321e-12
ENSRNOG00000010308	Nr2f2	2.18579	1.10619e-15	0.951828	0.000900743	1.50333	5.11736e-08	2.61151	3.99616e-20
ENSRNOG00000059041	AC141169.2	0.965739	1.34724e-15	0.428951	0.000701288	0.141143	0.327253	0.48718	0.000230697
ENSRNOG00000016999	Grp	-3.98937	1.44434e-15	-3.74909	1.31235e-13	-1.57203	0.00733718	-1.22664	0.0576654
ENSRNOG00000028648	Olig1	-0.963451	1.44434e-15	-0.858569	2.56603e-12	-1.94269	2.12364e-61	-0.971068	3.09434e-15
ENSRNOG00000001255	Mlxip	-0.861921	1.50587e-15	-0.0138941	0.942436	0.2552	0.0454407	0.108615	0.471864
ENSRNOG00000048915	Twf2	-1.15843	1.51859e-15	-1.05194	1.8188e-12	-0.521446	0.00170485	-0.376745	0.0392783
ENSRNOG00000007271	Map3k9	-1.67682	1.6391e-15	-0.941582	2.11656e-05	-0.00985213	0.979429	-0.17901	0.535628
ENSRNOG00000032238	Plcd1	-1.19932	1.65758e-15	-0.717221	8.87862e-06	-0.311315	0.0889175	-0.601775	0.000446819
ENSRNOG00000011803	Lrfn2	-1.83874	1.66035e-15	-2.16251	5.07389e-21	-0.652662	0.0170112	-0.528549	0.0759446
ENSRNOG00000001172	Rnf10	-0.364914	1.70539e-15	-0.359401	1.3593e-14	0.0586434	0.31696	-0.462681	1.52648e-22
ENSRNOG00000021808	Tecr	-0.775453	1.70864e-15	-0.327444	0.00183412	-1.36401	2.13616e-46	-0.103611	0.411799
ENSRNOG00000009495	Src	-0.741267	1.73558e-15	-0.483586	5.75284e-07	0.943406	9.17423e-22	-0.0320499	0.825028
ENSRNOG00000005515	Rhbdl3	1.32409	1.75354e-15	-0.18873	0.348217	-0.396877	0.0212953	-0.649135	0.000104548
ENSRNOG00000004672	Sec14l2	-1.0638	1.77075e-15	-0.965668	9.64668e-13	-0.0513658	0.786744	-0.342317	0.0253983
ENSRNOG00000011231	Cntnap4	1.55952	1.80617e-15	1.66973	2.9895e-17	1.79769	1.35737e-19	2.10617	1.73318e-25
ENSRNOG00000015425	Ssx2ip	-1.10655	1.86638e-15	-1.30648	4.67521e-21	0.31859	0.0476449	-0.612657	3.98334e-05
ENSRNOG00000005719	Emc4	-0.703125	1.97936e-15	-0.334678	0.000529671	-0.66657	2.55247e-13	-0.405317	3.30963e-05
ENSRNOG00000024636	Gpr85	0.873202	1.97993e-15	0.258983	0.032385	0.73516	2.40694e-10	0.33068	0.00716351
ENSRNOG00000020897	Prpf19	-0.478918	1.9894e-15	-0.438491	9.96314e-13	-0.740923	8.99138e-35	-0.130003	0.0748879
ENSRNOG00000062181	AABR07072236.1	0.701995	2.11289e-15	-0.645023	5.879e-14	0.377848	4.95368e-05	-0.160337	0.122085
ENSRNOG00000005003	Ptprn2	-0.758392	2.16456e-15	-0.503822	3.37548e-07	0.752277	2.04108e-14	-0.914789	1.06796e-21
ENSRNOG00000016456	Il33	-1.08626	2.24517e-15	-1.17267	1.7113e-17	-1.45787	1.10928e-26	-0.995542	2.84173e-12
ENSRNOG00000061582	Scamp1	0.698221	2.28158e-15	0.286687	0.00248793	0.520821	6.1174e-09	-0.0452993	0.718785
ENSRNOG00000018804	Ripor2	0.868808	2.42075e-15	-0.231181	0.0590403	2.1879	9.99487e-69	-0.384165	0.000892037
ENSRNOG00000022946	Slc22a3	-3.78475	2.43634e-15	-1.16082	0.0709851	-2.87664	2.51725e-08	-6.5321	1.91082e-46
ENSRNOG00000029205	Zfp354c	0.675059	2.47307e-15	0.517601	3.52191e-09	0.896573	7.12627e-23	0.635209	4.20447e-12
ENSRNOG00000026128	Cpne8	1.08	2.60951e-15	0.806231	7.44352e-09	1.81741	8.75756e-36	1.22152	1.33844e-17
ENSRNOG00000012206	Dennd5a	-0.625179	2.66978e-15	-0.244789	0.00439254	-1.19318	9.0831e-54	-0.191947	0.0314864
ENSRNOG00000022619	Fth1	-0.867966	2.74912e-15	-1.03191	3.68307e-21	-3.41739	5.39657e-227	-0.925806	3.73685e-17
ENSRNOG00000009364	Ndufb9	-0.768006	2.91611e-15	-0.439235	1.99563e-05	-0.447307	1.21752e-05	-0.460811	1.02324e-05
ENSRNOG00000001431	Rasa4	1.78068	2.96911e-15	2.04092	2.91225e-18	1.36965	3.77357e-09	2.34811	3.34999e-20
ENSRNOG00000037613	Kdm6b	0.97759	3.02287e-15	1.17941	3.57469e-21	2.14369	1.13992e-60	1.52224	1.32852e-32
ENSRNOG00000012918	Mtmr6	-0.558381	3.09787e-15	-0.642609	1.47231e-19	-0.395942	8.05927e-08	-0.680597	3.73405e-21
ENSRNOG00000006391	Smarcad1	0.727618	3.11326e-15	0.382257	7.73954e-05	0.509256	1.30241e-07	0.279468	0.0067028
ENSRNOG00000014258	Rab32	1.77388	3.22397e-15	2.70809	1.97383e-24	-0.423943	0.053444	0.416972	0.0916571
ENSRNOG00000018336	Eps8l2	-1.76153	3.22397e-15	-0.587394	0.0308976	0.552151	0.0944362	0.317964	0.385704
ENSRNOG00000016422	Klhl36	1.4714	3.23036e-15	1.09465	6.15296e-09	0.607329	0.0017332	1.1219	3.37323e-08
ENSRNOG00000052319	AABR07004881.1	-1.37673	3.24393e-15	-2.15769	1.39714e-36	-0.2252	0.316502	-0.800234	2.99856e-05
ENSRNOG00000037720	Rita1	-1.27777	3.31155e-15	-0.907715	1.17176e-07	-0.674368	0.000190218	-0.585096	0.00218665
ENSRNOG00000046794	Khdrbs1	0.576033	3.48421e-15	0.462838	6.37099e-10	0.600021	1.73759e-15	0.11019	0.221649
ENSRNOG00000037134	Shc4	1.79056	3.55436e-15	1.78198	2.13246e-14	1.55931	4.95539e-11	1.9163	1.30133e-14
ENSRNOG00000029682	Clic1	1.44343	3.66315e-15	1.24688	2.64249e-11	0.115103	0.610318	0.920725	3.09586e-06
ENSRNOG00000018630	Gapdh	-0.533087	3.92586e-15	-0.367829	1.31264e-07	-0.500721	1.48068e-13	-0.26818	0.000197078
ENSRNOG00000020676	Ppp1r14a	-1.72934	3.98163e-15	-1.83071	1.94176e-16	-4.29464	1.03757e-100	-1.66047	2.58529e-12
ENSRNOG00000045961	Lyrm7	-0.976717	3.98201e-15	-1.0711	1.51337e-17	-1.05918	2.00106e-16	-1.03561	3.25018e-15
ENSRNOG00000015406	Pgm5	1.56	3.98315e-15	1.15066	1.01273e-08	-1.35391	4.79357e-14	0.86402	4.17486e-05
ENSRNOG00000010551	Lhx2	-1.24425	4.17627e-15	-1.4689	1.45249e-20	5.83006	2.64963e-43	-0.184054	0.385113
ENSRNOG00000004839	B4galnt1	-0.905592	4.18341e-15	-0.570657	2.2485e-06	0.790791	2.59041e-10	-0.640529	1.22501e-07
ENSRNOG00000014149	Npy1r	-2.29989	4.18861e-15	-1.74385	6.68089e-09	-0.63449	0.058719	-0.933839	0.00436837
ENSRNOG00000001465	Ids	-0.883115	4.36638e-15	-1.21193	1.54413e-27	-0.282987	0.0216716	-1.27625	2.71218e-30
ENSRNOG00000011321	Rftn1	2.06007	4.45012e-15	0.415158	0.103632	-1.30994	5.64707e-11	0.915653	0.000611667
ENSRNOG00000009244	Abhd4	0.699344	4.60708e-15	0.952808	2.89157e-26	-0.243056	0.0104079	0.836036	8.18519e-20
ENSRNOG00000003741	Nptx1	-2.31958	4.736e-15	-2.99066	2.27843e-24	-0.584212	0.0767141	-0.499369	0.155931
ENSRNOG00000018387	Wdr7	-0.75764	4.80421e-15	-0.88464	4.74003e-20	-0.438406	1.14696e-05	-0.868969	3.33813e-19
ENSRNOG00000014320	Inhba	1.34629	5.41017e-15	1.99542	1.46974e-27	1.73391	2.16863e-20	0.593049	0.00141533
ENSRNOG00000008079	Ugp2	-0.504337	5.53069e-15	-0.282187	4.94114e-05	-0.717551	5.83267e-28	-0.210732	0.00536625
ENSRNOG00000005854	Angpt1	2.06818	5.57407e-15	0.858928	0.00155548	0.818085	0.00254495	2.6724	8.5531e-19
ENSRNOG00000052758	Fam49a	-0.78421	5.57879e-15	-0.952687	1.43406e-21	1.23974	2.37996e-33	-1.44138	1.92391e-48
ENSRNOG00000023533	Fam69a	-0.815326	5.61561e-15	-0.870168	1.8062e-16	-1.50671	5.1094e-49	-0.598498	1.81351e-07
ENSRNOG00000052444	Samd9	-1.04114	5.69799e-15	-0.369618	0.0132612	-0.441902	0.00208344	-0.81695	3.48478e-09
ENSRNOG00000003704	Fam184b	1.22588	5.76113e-15	1.6289	1.44195e-23	2.56508	5.15164e-43	1.17198	2.09689e-12
ENSRNOG00000043103	Frrs1l	-1.22746	5.86916e-15	-1.01713	2.3167e-10	0.154966	0.448687	-0.453125	0.0111445
ENSRNOG00000006500	Snf8	-0.8937	5.999e-15	-0.663763	2.48939e-08	-0.724785	1.10573e-09	-0.811747	1.2529e-11
ENSRNOG00000022863	Lingo4	-4.24749	6.31735e-15	-1.77533	0.00525833	-6.15704	3.35829e-31	-0.255564	0.796868
ENSRNOG00000026649	Dnmt3a	0.841935	6.33063e-15	1.06629	9.93599e-23	1.36485	2.92156e-35	0.563615	5.88949e-07
ENSRNOG00000017079	Pgm2l1	-1.29892	6.36605e-15	-2.1297	1.03823e-38	-0.190048	0.349808	-0.798264	4.58789e-06
ENSRNOG00000052795	Itpr3	1.32441	6.427e-15	2.39595	1.97516e-41	2.02766	7.86141e-30	2.30992	5.08805e-36
ENSRNOG00000004179	Nts	3.78846	6.52851e-15	-2.60159	2.16655e-21	-1.52814	1.32642e-07	-1.61407	3.83693e-08
ENSRNOG00000001739	Meltf	-2.64429	6.66865e-15	-1.15954	0.0024687	-0.78672	0.0553404	-0.679481	0.125063
ENSRNOG00000038427	AABR07015812.1	-1.21188	6.84134e-15	-0.96626	2.91629e-09	0.329744	0.124405	-2.28068	2.44047e-51
ENSRNOG00000011455	Slc36a4	-0.790361	7.24551e-15	-0.735424	1.504e-12	-0.414595	0.000212259	-0.240718	0.0559704
ENSRNOG00000011575	Adamts18	3.35152	7.37128e-15	1.25588	0.00140751	2.35413	2.58793e-08	2.27976	1.28731e-07
ENSRNOG00000025527	Mtcl1	-1.04495	7.71786e-15	0.743174	1.61596e-07	1.06527	4.04207e-14	-1.47922	1.22027e-28
ENSRNOG00000045884	Gm25994	1.04454	7.73642e-15	0.752077	4.54642e-08	1.26305	2.49326e-20	-0.0274656	0.89595
ENSRNOG00000046705	Snx3	-0.531568	7.9749e-15	-0.508589	2.4491e-13	-0.430286	1.12426e-09	-0.696242	1.07184e-23
ENSRNOG00000059660	AABR07065531.5	-0.956397	8.08669e-15	-0.657864	1.99043e-07	0.691817	3.65204e-08	-0.932937	5.059e-14
ENSRNOG00000009094	Nudt4	-0.802125	8.21831e-15	0.626154	4.99355e-09	0.18602	0.116957	1.04613	1.29889e-22
ENSRNOG00000010286	Cast	-0.877417	8.21831e-15	-0.494295	3.73511e-05	-1.15715	6.86739e-25	0.258714	0.0600404
ENSRNOG00000036659	Fn3k	-1.1909	8.21831e-15	-0.599244	0.000343557	0.574977	0.00203159	-0.348748	0.0649211
ENSRNOG00000012503	Dnajc16	-0.687265	8.25926e-15	-0.505823	5.2004e-08	-0.222163	0.0337987	-0.497086	3.30388e-07
ENSRNOG00000006962	Stk32c	-0.674307	8.43805e-15	-0.277948	0.00397189	1.54934	1.57774e-47	-1.70382	9.17307e-91
ENSRNOG00000004075	Ccdc42	-3.52978	8.60678e-15	-2.69305	2.17199e-08	0.264802	0.753784	-5.99925	6.04388e-43
ENSRNOG00000008797	Tmpo	0.940452	8.98576e-15	0.422243	0.00101812	0.284528	0.0317	0.27874	0.0437294
ENSRNOG00000054172	Ctnnb1	0.450268	9.23547e-15	0.169968	0.00739105	0.570987	4.51591e-22	0.00767388	0.936979
ENSRNOG00000012367	Pcdh7	-0.788713	9.41773e-15	0.632968	4.31656e-09	0.47277	1.61077e-05	0.480352	1.916e-05
ENSRNOG00000022721	Clec18a	3.29819	9.51202e-15	3.16773	3.13347e-13	1.4557	0.000218884	2.87438	3.08476e-10
ENSRNOG00000037137	Svip	-0.676627	9.61234e-15	-0.632612	1.90228e-12	-1.62364	1.02771e-82	-1.00518	2.42768e-29
ENSRNOG00000021314	Fdft1	-0.75461	1.02983e-14	-0.712808	5.87766e-13	-2.28705	4.68935e-132	-0.386362	0.00031458
ENSRNOG00000014599	Dhx36	0.600784	1.03964e-14	0.37302	3.76301e-06	0.553113	3.412e-12	0.318488	0.00013486
ENSRNOG00000015503	Otud7a	-0.897858	1.06653e-14	-0.680312	2.06771e-08	-0.305443	0.024611	-0.708344	1.62182e-08
ENSRNOG00000004571	RGD1563680	1.96928	1.10585e-14	1.77168	8.1399e-12	1.49795	1.44291e-08	1.1474	1.70904e-05
ENSRNOG00000012477	Eef1a2	-0.695834	1.11818e-14	-0.321882	0.000815304	0.152378	0.139913	-0.0778835	0.516344
ENSRNOG00000005882	Tle1	1.05153	1.12252e-14	-0.670911	4.68887e-07	1.17322	2.96793e-16	0.195947	0.236647
ENSRNOG00000017260	Cdr2	-1.22482	1.13918e-14	-0.234609	0.259277	-2.18492	1.26019e-45	-1.9854	8.27795e-37
ENSRNOG00000043137	Lbhd2	5.24902	1.20344e-14	4.84115	1.04223e-12	4.27697	2.34698e-10	4.20916	8.15586e-10
ENSRNOG00000006756	Maged1	0.492473	1.22374e-14	0.0119153	0.90961	0.713746	1.0923e-28	0.190172	0.00685563
ENSRNOG00000005130	Ogdh	-0.439566	1.30444e-14	-0.228423	0.000177513	-0.601351	5.11117e-26	-0.54933	2.14576e-21
ENSRNOG00000010475	Casp3	1.08711	1.32414e-14	1.04762	2.95109e-13	1.33404	1.48643e-19	1.00515	1.23389e-11
ENSRNOG00000016705	Prpf4b	0.572567	1.33813e-14	0.436972	9.41085e-09	0.994692	4.83717e-39	0.458979	3.19391e-09
ENSRNOG00000025000	Cep104	-0.507924	1.35682e-14	-0.376971	4.25989e-08	-0.538804	2.16877e-15	-0.645824	2.07943e-21
ENSRNOG00000031709	Ppfibp1	1.10504	1.42902e-14	1.20453	6.24921e-17	1.23815	6.74546e-18	1.80858	1.04754e-35
ENSRNOG00000052707	Cacna1a	-0.750396	1.43346e-14	-0.450709	9.24879e-06	1.15262	2.66012e-31	-0.0439186	0.760165
ENSRNOG00000005479	Slc1a2	-2.07336	1.46768e-14	-1.80623	3.21857e-11	-0.875789	0.00194074	-1.33394	1.65711e-06
ENSRNOG00000040052	RT1-M6-2	-4.52665	1.47161e-14	-5.82858	6.72159e-24	-0.5041	0.579137	-2.30219	0.000890158
ENSRNOG00000018356	Trim3	-0.696016	1.47236e-14	-0.665522	5.37208e-13	-0.633248	1.44821e-11	-0.381691	0.000161475
ENSRNOG00000025702	Kdm2b	0.954382	1.47479e-14	0.332739	0.0127599	0.900013	9.407e-12	0.213122	0.150655
ENSRNOG00000016414	Slc22a17	-0.627695	1.485e-14	-0.725482	5.4632e-19	-0.590581	5.89083e-13	-0.76354	9.81774e-21
ENSRNOG00000029360	Serinc1	-0.584461	1.52421e-14	-0.777292	6.38843e-25	-0.308216	9.28218e-05	-0.709169	9.85631e-21
ENSRNOG00000000231	Kctd17	-0.987845	1.59242e-14	-0.925103	1.14446e-12	0.235374	0.122231	-1.71797	5.10561e-42
ENSRNOG00000047236	AABR07008066.2	1.35109	1.59242e-14	1.18382	4.56898e-11	1.81052	6.69161e-19	0.963437	4.42636e-07
ENSRNOG00000024089	Fndc3b	1.0959	1.59372e-14	0.354527	0.022581	1.43475	7.78911e-21	0.338715	0.0358196
ENSRNOG00000038366	Larp1b	-1.21699	1.6947e-14	-0.658767	0.000163628	-0.915722	7.21296e-08	0.521542	0.0181234
ENSRNOG00000031852	Lsamp	-0.751192	1.70087e-14	-1.17871	2.02834e-34	-0.498483	9.16229e-07	-0.411512	0.000101774
ENSRNOG00000017817	Cox4i1	-0.529704	1.72469e-14	-0.253126	0.000670416	-0.313428	1.48386e-05	-0.506953	9.73668e-13
ENSRNOG00000000010	Cbln1	4.39854	1.76323e-14	1.4979	0.0155402	-0.110111	0.89367	3.08429	1.30648e-07
ENSRNOG00000019861	Tollip	-0.652403	1.85019e-14	-0.578746	2.43324e-11	-0.427333	1.40161e-06	-0.213365	0.0308273
ENSRNOG00000002907	Plekha6	-0.861381	1.86468e-14	-0.382904	0.00164158	-1.05626	2.93008e-21	-0.857915	5.39827e-14
ENSRNOG00000005428	Ctbp1	-0.498782	1.89067e-14	-0.220246	0.00193612	-0.111177	0.149556	-0.249071	0.000518048
ENSRNOG00000045918	Jarid2	0.766159	2.01093e-14	0.848038	7.21686e-17	1.03399	2.4049e-23	0.720879	6.35289e-12
ENSRNOG00000011856	Ankrd29	1.65971	2.05853e-14	1.6211	3.17254e-13	1.28607	1.16758e-08	2.81644	6.20273e-25
ENSRNOG00000010452	Cycs	-0.616631	2.06597e-14	-0.53526	7.82412e-11	-0.458147	3.84647e-08	-0.369742	2.0936e-05
ENSRNOG00000001243	Zcchc8	0.794292	2.08058e-14	0.592141	2.84219e-08	0.877904	7.90832e-16	0.419626	0.000200749
ENSRNOG00000006833	Rb1cc1	-0.615093	2.0962e-14	-0.225258	0.0115994	0.123106	0.198412	-0.0263426	0.833242
ENSRNOG00000037227	Yes1	1.19304	2.10012e-14	0.981034	7.27312e-10	-0.14008	0.451227	0.595141	0.000425216
ENSRNOG00000000417	Numa1	0.617424	2.14867e-14	0.719474	8.07349e-19	0.619879	3.28437e-14	0.690846	5.78034e-17
ENSRNOG00000025604	Atad2	-1.31817	2.27565e-14	0.0155477	0.962018	0.206978	0.365065	-1.1065	8.41519e-10
ENSRNOG00000056207	Capza2	-0.755439	2.32755e-14	-1.07177	6.6465e-28	-0.413191	6.16438e-05	-0.859165	6.0292e-18
ENSRNOG00000019180	Acsl4	-0.630911	2.33517e-14	-1.08699	5.46551e-41	0.396756	8.91905e-06	-0.591034	3.73871e-12
ENSRNOG00000011913	Cp	1.5764	2.5867e-14	1.84304	1.37098e-18	-0.896542	1.4229e-05	1.79395	4.59213e-17
ENSRNOG00000015306	Slc9a4	2.96677	2.60452e-14	-2.49845	1.0284e-16	2.50318	7.23754e-10	2.07783	1.82862e-07
ENSRNOG00000004068	Ncoa1	-0.418436	2.63105e-14	-0.584879	7.65707e-27	0.412312	7.47943e-13	-0.41684	1.3789e-13
ENSRNOG00000025596	Ago4	1.08113	2.73954e-14	0.764256	1.36527e-07	1.4355	8.49394e-19	0.543304	0.00050346
ENSRNOG00000051377	AABR07001099.2	-0.729213	2.74086e-14	-0.611712	6.40588e-10	0.35955	0.00159873	-0.514573	8.8956e-07
ENSRNOG00000050714	Islr2	-1.38375	2.78745e-14	-2.22635	4.59777e-36	2.92156	4.68737e-24	-1.31176	2.71278e-12
ENSRNOG00000018494	Ppp1r3c	-0.886085	2.82157e-14	-1.02044	2.07137e-18	-0.790164	3.29092e-11	-0.67891	3.32652e-08
ENSRNOG00000024310	Kcnf1	1.40483	2.88909e-14	2.95447	7.22386e-56	6.51314	2.63841e-116	1.25253	2.84299e-11
ENSRNOG00000001120	Med13l	-0.437134	2.94591e-14	-0.17991	0.00465819	0.982536	6.52111e-53	-0.357645	4.12033e-09
ENSRNOG00000014132	Mypop	-0.921771	2.96697e-14	-0.350943	0.0115562	-0.375521	0.00676481	-0.629632	2.38856e-06
ENSRNOG00000057724	AC118957.2	-1.62643	3.01274e-14	-0.678975	0.00482807	1.4752	2.27255e-07	-0.179405	0.574492
ENSRNOG00000000463	Col11a2	-1.12716	3.04203e-14	-1.07054	7.70734e-13	-0.527304	0.000701135	-1.15608	9.41635e-15
ENSRNOG00000019181	Synpo	-0.929042	3.0562e-14	-0.231414	0.107458	3.44789	2.26578e-118	-0.366415	0.00660752
ENSRNOG00000017114	Synj2	-1.25623	3.09824e-14	-1.48371	2.09292e-19	-1.68827	4.13096e-25	0.00166855	0.998375
ENSRNOG00000011498	Psip1	0.785556	3.14682e-14	0.467093	1.41305e-05	0.995193	4.59396e-22	0.41222	0.000165291
ENSRNOG00000004542	Ttc8	1.14854	3.20267e-14	0.744234	1.73644e-06	1.13611	4.32054e-13	0.974938	9.33797e-10
ENSRNOG00000011202	Chrna4	-3.17854	3.20514e-14	-2.05092	2.237e-06	-2.84432	1.03001e-11	-1.46502	0.00114683
ENSRNOG00000017969	Olfm3	-0.838478	3.40091e-14	0.132985	0.362812	0.0396691	0.806638	-1.03238	2.19378e-20
ENSRNOG00000056826	Arap2	-1.14257	3.53475e-14	-0.74534	1.80149e-06	-0.97738	1.05888e-10	-0.602891	0.000166608
ENSRNOG00000011586	Ccnl1	0.66179	3.59757e-14	0.481835	8.63229e-08	0.947356	1.54037e-24	0.465642	7.03555e-07
ENSRNOG00000013533	Acin1	0.463004	3.67724e-14	0.409927	4.53735e-11	0.950485	1.02597e-51	0.392227	7.83071e-10
ENSRNOG00000007326	Prepl	-0.624532	3.7253e-14	-0.542306	9.11178e-11	-0.0687537	0.513711	-0.416065	1.36669e-06
ENSRNOG00000028417	Neurod2	-3.64564	3.72997e-14	-4.62718	3.08411e-22	0.707076	0.243663	-1.33899	0.0131671
ENSRNOG00000042044	Stard3	-0.794787	3.74866e-14	-0.635901	5.76354e-09	-1.49726	4.67919e-48	-0.403035	0.000849683
ENSRNOG00000050445	Gde1	-0.693458	3.74866e-14	-0.545929	8.49998e-09	-0.49958	2.18111e-07	-0.376292	0.000226124
ENSRNOG00000001407	Tfr2	2.21258	3.77343e-14	1.98076	2.21149e-11	2.2383	8.68552e-12	1.68616	7.51282e-08
ENSRNOG00000007142	B3gat1	-0.86852	3.80205e-14	-1.85195	1.28123e-61	-0.0402595	0.803803	-0.514884	2.10842e-05
ENSRNOG00000058249	Pgk1	-0.620866	3.80771e-14	-0.616322	8.35289e-14	-0.546794	3.84028e-11	-0.399007	3.58416e-06
ENSRNOG00000027489	Mn1	-1.4251	4.01397e-14	-0.680815	0.00102579	1.19996	4.46901e-07	-2.92984	3.70563e-58
ENSRNOG00000018690	Rgs17	-0.803744	4.01825e-14	-0.171392	0.199326	-0.245534	0.0488078	-0.425754	0.000366637
ENSRNOG00000012278	Fgf10	4.09148	4.18136e-14	0.44653	0.447889	-0.864039	0.0782536	2.68705	4.06705e-07
ENSRNOG00000007587	Tcp11l2	0.74019	4.18432e-14	0.78051	7.89228e-15	0.271727	0.0109095	0.73418	4.10594e-12
ENSRNOG00000015733	Myl12b	-0.648681	4.24642e-14	-0.537319	8.62336e-10	-0.170882	0.0807417	-0.138932	0.188935
ENSRNOG00000021209	Polr3gl	0.878312	4.33662e-14	0.833484	3.74114e-12	1.41426	3.81617e-25	0.479282	0.000209698
ENSRNOG00000031730	Eloc	-0.648316	4.34248e-14	-0.726183	5.58161e-17	-0.695475	5.57909e-15	-0.657966	5.21501e-13
ENSRNOG00000019926	Ramp1	-1.34811	4.36873e-14	0.0934768	0.752015	-0.237085	0.328981	-3.21553	1.13922e-80
ENSRNOG00000024460	Tarsl2	-0.866811	4.42746e-14	-0.658113	4.97783e-08	-0.534653	2.38358e-05	-0.51404	8.9678e-05
ENSRNOG00000019236	Rnf220	-0.559596	4.43902e-14	-0.16867	0.0495682	-0.525407	4.06922e-12	-0.313915	0.000106394
ENSRNOG00000006956	AABR07049085.1	2.06351	4.50014e-14	1.62375	4.69339e-09	0.102613	0.779181	3.16871	1.95304e-26
ENSRNOG00000001770	Ehhadh	1.85116	4.50951e-14	2.0454	6.02084e-16	0.899642	0.00034754	2.10376	3.03987e-15
ENSRNOG00000016677	Csnk1g3	0.786933	4.55258e-14	0.601385	1.84296e-08	1.00655	1.47962e-20	0.749429	7.81456e-12
ENSRNOG00000057589	Rnf11l1	-0.643625	4.64055e-14	-0.576666	3.21857e-11	-0.391639	1.23267e-05	-0.277577	0.00369762
ENSRNOG00000013656	Lpar1	-1.13545	4.64836e-14	-0.834137	6.97794e-08	-2.73938	7.34051e-79	-1.11936	2.04784e-13
ENSRNOG00000004172	Pdk2	-0.86719	4.65e-14	-0.748206	1.71822e-10	-0.49324	4.48805e-05	-0.355547	0.0058841
ENSRNOG00000017003	Plxna1	-1.06596	4.79934e-14	-1.3414	1.25731e-21	-0.253648	0.118199	0.267226	0.117231
ENSRNOG00000015389	Stag1	0.958519	5.00529e-14	0.698757	8.4389e-08	0.679773	2.07225e-07	0.483673	0.000403114
ENSRNOG00000019175	Ercc6l2	0.615673	5.15062e-14	0.581301	4.29668e-12	-0.0983504	0.313932	0.149301	0.131154
ENSRNOG00000010146	Ndn	-0.749641	5.17384e-14	-1.28893	4.75803e-40	-1.06148	1.11529e-26	-1.41054	8.45185e-47
ENSRNOG00000019113	Hnrnpk	0.405316	5.21347e-14	0.21252	0.000188022	0.201351	0.000379219	0.0919301	0.155843
ENSRNOG00000034177	Efna5	-1.55066	5.32858e-14	1.68335	3.63893e-10	0.734092	0.0056069	0.364014	0.213497
ENSRNOG00000000411	Nus1	-0.550266	5.34373e-14	-0.508887	1.07615e-11	-0.427344	3.03439e-08	-0.683659	1.28484e-19
ENSRNOG00000007818	Slc45a4	-0.838255	5.35737e-14	-0.537573	7.69406e-06	-0.541735	1.12248e-05	0.110626	0.527717
ENSRNOG00000010890	Bmp1	-0.845303	5.46137e-14	-0.201592	0.143206	-0.452487	0.000194856	0.0925702	0.576638
ENSRNOG00000050317	Uhrf1bp1l	-0.444694	5.4923e-14	-0.0400532	0.638547	0.70512	6.23713e-28	-0.0843673	0.270049
ENSRNOG00000058973	Atad2b	0.87619	5.54472e-14	0.618891	2.39862e-07	0.506606	3.17958e-05	0.820009	2.98833e-11
ENSRNOG00000020915	Setd2	0.44182	5.61212e-14	0.520712	2.13915e-18	0.728283	4.42785e-33	0.436841	1.34907e-12
ENSRNOG00000018125	Sephs1	0.712593	5.65846e-14	0.672509	3.74192e-12	0.715382	4.72301e-13	0.589578	5.26476e-09
ENSRNOG00000010299	Eps15	-0.69014	5.66931e-14	-0.736358	1.26436e-15	-1.0411	1.13641e-30	-0.193372	0.0713513
ENSRNOG00000029738	Diras1	-1.02639	5.82134e-14	-0.770414	4.42561e-08	-0.0509147	0.795526	-0.903557	1.33847e-10
ENSRNOG00000001506	Tmem35a	0.795521	5.95629e-14	0.460984	3.00351e-05	0.742994	7.00718e-12	1.32288	1.10017e-32
ENSRNOG00000017714	Usp3	1.19266	5.97543e-14	0.681016	3.05935e-05	0.892804	8.13502e-08	-0.151053	0.448183
ENSRNOG00000061782	Tspyl2	-0.621002	6.17118e-14	-0.770698	9.51071e-21	-0.336823	0.000122645	-0.600446	1.85234e-12
ENSRNOG00000050585	Pgam1	-0.518932	6.20441e-14	-0.492481	1.77653e-12	-0.414319	3.6973e-09	-0.0934597	0.28348
ENSRNOG00000020970	Rundc3a	-0.600194	6.22549e-14	-0.469279	9.91601e-09	0.735396	7.73168e-19	-0.174883	0.0602595
ENSRNOG00000027300	Ttc7b	-0.750517	6.2383e-14	-0.455892	1.30012e-05	0.71345	6.17866e-12	0.308336	0.00591207
ENSRNOG00000030568	Rgs12	1.22071	6.24953e-14	1.1846	5.56492e-13	1.68624	1.55387e-24	0.883173	1.5951e-07
ENSRNOG00000000571	Psap	-0.377351	6.57395e-14	-0.380766	5.14127e-14	-0.84671	1.13388e-66	-0.42254	6.67042e-17
ENSRNOG00000004581	Zdhhc9	-0.824548	6.7687e-14	-0.538161	3.0865e-06	-1.3366	5.38112e-35	-0.619092	9.5319e-08
ENSRNOG00000033262	Reep6	-1.45579	6.80216e-14	-0.763521	0.000264144	-0.960987	2.17939e-06	-0.721484	0.000809269
ENSRNOG00000009888	Timm8b	-0.781015	6.92435e-14	-0.832018	3.71586e-15	-1.21201	3.07199e-31	-1.05375	8.56945e-23
ENSRNOG00000049410	Chrm3	-1.40268	7.10718e-14	-1.3131	3.81604e-12	1.70457	2.19106e-16	-0.0361724	0.905619
ENSRNOG00000053239	Clmp	1.79662	7.46157e-14	0.661186	0.0115839	1.62522	1.52283e-11	4.14544	3.01008e-58
ENSRNOG00000016627	Eya4	-1.80661	7.8397e-14	-0.459963	0.1325	-1.92083	4.15109e-15	-0.634021	0.0347215
ENSRNOG00000021137	Kctd15	1.03841	7.9892e-14	0.539898	0.000194446	0.820223	1.56085e-08	1.16723	7.73631e-15
ENSRNOG00000011111	Cipc	-0.509397	8.20141e-14	-0.484358	3.52292e-12	0.152308	0.063231	-0.735516	3.44469e-26
ENSRNOG00000001346	Cops6	-0.526362	8.42627e-14	-0.399938	5.77167e-08	-0.734182	1.08511e-24	-0.610417	1.26552e-16
ENSRNOG00000008082	Rgs6	-0.974246	8.89045e-14	0.720195	1.78022e-07	-0.165847	0.292817	0.759268	6.38733e-08
ENSRNOG00000018102	Coa5	-0.565453	8.99955e-14	-0.45408	4.98813e-09	0.114991	0.206068	-0.623539	5.37984e-16
ENSRNOG00000020193	Runx2	1.31495	9.35428e-14	2.30913	1.50775e-32	2.91901	6.08334e-38	2.74555	2.68441e-34
ENSRNOG00000049415	AABR07055413.1	3.76101	9.39669e-14	2.07715	4.29368e-06	4.39721	9.0598e-14	4.13874	1.81215e-12
ENSRNOG00000025160	Tmem56	-1.24297	9.43695e-14	-1.01489	3.9539e-09	-0.831124	2.79989e-06	-0.753537	4.34711e-05
ENSRNOG00000055281	Dcbld2	0.78818	9.44925e-14	1.02966	2.934e-21	0.98608	1.51141e-18	0.363388	0.00183068
ENSRNOG00000020088	Klhl26	-0.819369	1.03653e-13	-1.41448	8.13987e-40	-0.0516778	0.75427	-0.122086	0.436228
ENSRNOG00000054782	Ppp3cb	-0.80849	1.07358e-13	-0.911217	4.55413e-17	0.898586	3.3095e-16	-0.764412	3.53386e-12
ENSRNOG00000025244	Trrap	0.416777	1.07986e-13	0.0877867	0.192899	1.43747	1.22469e-136	-0.00789781	0.931572
ENSRNOG00000031033	ND2	-1.28432	1.10024e-13	-0.62729	0.00062019	-0.0663026	0.779045	-0.98093	2.63327e-08
ENSRNOG00000027590	Jakmip3	-0.679967	1.1006e-13	-0.78876	1.08916e-17	-1.67992	4.13694e-81	-0.649372	2.73247e-11
ENSRNOG00000007982	Slc9a1	0.596828	1.10344e-13	0.349487	3.21564e-05	0.234517	0.00708585	-0.317591	0.000167166
ENSRNOG00000012235	Ppp1r17	4.74065	1.10825e-13	3.5031	1.18177e-08	1.72914	0.0040498	4.03771	6.05443e-10
ENSRNOG00000008845	Pdrg1	-1.03536	1.11521e-13	-0.787839	6.49645e-08	-1.48197	1.14748e-26	-1.00408	7.12328e-12
ENSRNOG00000054669	RGD1305110	-0.588411	1.12432e-13	-0.231184	0.0098588	-0.315986	0.000273479	-0.129676	0.210716
ENSRNOG00000004585	Tmtc2	1.08107	1.1663e-13	0.655443	1.26315e-05	0.344891	0.0292395	1.1536	3.78631e-13
ENSRNOG00000034234	COX1	-0.984748	1.19919e-13	-0.377345	0.00920334	-0.165397	0.291749	-0.755603	2.37112e-08
ENSRNOG00000030418	Tmem47	-0.574371	1.25542e-13	-0.243618	0.00403114	-0.816162	2.27367e-26	-0.941041	1.88121e-34
ENSRNOG00000053787	Mdfic	1.5681	1.2643e-13	1.7782	4.88114e-16	0.310237	0.190956	0.825902	0.000242676
ENSRNOG00000000437	Agpat1	-0.622207	1.26433e-13	-0.641578	3.45124e-14	-0.418143	1.68306e-06	-0.39303	1.22345e-05
ENSRNOG00000046955	Cbx6	-0.640212	1.2657e-13	0.00134327	0.995346	0.518038	7.39611e-09	-0.541523	9.71623e-10
ENSRNOG00000046891	Hk1	-0.472564	1.28016e-13	-0.622069	9.465e-23	0.112585	0.128751	-0.101318	0.19619
ENSRNOG00000004505	Nfic	-1.20781	1.29e-13	-0.119079	0.607288	-1.12774	6.56731e-12	0.0548891	0.831396
ENSRNOG00000031364	Kif1c	-0.859066	1.31723e-13	-1.0336	3.44443e-19	-1.67592	9.56877e-50	-0.647714	6.29431e-08
ENSRNOG00000021117	Rps6ka4	-0.982897	1.42432e-13	-0.383339	0.0108641	-0.394233	0.0084038	-2.16941	8.98742e-64
ENSRNOG00000056012	Syt16	-1.18606	1.49212e-13	-1.28522	1.83422e-15	1.15547	3.19819e-08	-1.66829	3.38654e-25
ENSRNOG00000001235	Gna12	-0.756772	1.501e-13	-0.734693	1.04852e-12	-1.93986	3.68325e-85	-0.833626	5.52909e-16
ENSRNOG00000043410	Cfap300	1.63992	1.52385e-13	1.24541	2.42314e-08	1.01598	1.01941e-05	0.725842	0.00219025
ENSRNOG00000003773	Hmox2	-0.742845	1.54261e-13	-0.383231	0.000406668	-1.2333	1.39044e-35	-0.204286	0.0940938
ENSRNOG00000006853	Elavl2	-1.14004	1.57382e-13	-1.13408	3.22184e-13	-1.31318	1.45571e-17	-0.109543	0.62166
ENSRNOG00000019282	Ubqln1	-0.361734	1.5856e-13	-0.318926	1.98952e-10	-0.433816	2.32661e-18	-0.219391	3.86863e-05
ENSRNOG00000020269	Sugp2	-0.503511	1.5929e-13	-0.381095	7.60943e-08	0.260106	0.000739222	-0.409367	1.76773e-08
ENSRNOG00000014076	Mbnl1	-0.684917	1.61264e-13	-0.632465	3.2537e-11	-1.0081	3.15115e-27	-0.877838	4.70748e-20
ENSRNOG00000016670	AABR07028769.1	-0.801081	1.62247e-13	-0.555547	8.55304e-07	-2.77331	1.80804e-157	-0.575188	4.89983e-07
ENSRNOG00000014916	Lats1	0.561486	1.62292e-13	0.325913	4.36998e-05	0.609814	1.06339e-14	0.399506	8.85001e-07
ENSRNOG00000010888	Ankrd33b	-1.16043	1.63222e-13	-0.935216	9.1994e-09	4.29411	1.6264e-31	-0.697409	6.16006e-05
ENSRNOG00000028946	Cdc42ep4	-0.771367	1.64354e-13	-0.837277	1.70681e-15	-0.402448	0.000334527	-0.666586	1.05496e-09
ENSRNOG00000012703	Crh	2.18803	1.65314e-13	3.35151	2.70823e-22	4.49286	2.07828e-23	4.80942	4.58063e-23
ENSRNOG00000003936	Pwwp2a	0.767183	1.73803e-13	0.186853	0.122181	1.27169	7.03153e-31	0.697651	2.03504e-10
ENSRNOG00000019913	Mta2	0.502379	1.73996e-13	0.46577	2.78627e-11	0.550196	2.40051e-14	0.393644	1.0448e-07
ENSRNOG00000010945	Ywhab	-0.410169	1.81936e-13	-0.474363	1.45339e-17	0.0519067	0.456351	-0.382056	1.55729e-11
ENSRNOG00000005138	Pip4k2c	-0.864602	1.86658e-13	0.376518	0.00384484	1.00361	8.1819e-16	0.355412	0.00789308
ENSRNOG00000013657	Stmn3	-0.729011	1.88508e-13	-0.41229	8.06805e-05	-0.565678	2.02884e-08	0.0159138	0.922544
ENSRNOG00000014552	LOC100909657	-1.12764	1.8923e-13	-0.677822	4.93249e-05	-0.0153867	0.954961	-0.834502	9.19359e-07
ENSRNOG00000039856	Lrrc73	-1.09132	1.91786e-13	-0.678027	1.84174e-05	0.778849	1.48312e-05	-0.482507	0.00491873
ENSRNOG00000016848	Fzd4	-1.32633	1.96647e-13	-0.655625	0.000743337	0.0634548	0.80937	-0.389247	0.0680733
ENSRNOG00000030475	Mum1l1	1.95509	1.96674e-13	0.456115	0.0997009	0.243109	0.411805	-0.348537	0.22033
ENSRNOG00000019075	Stat5b	1.05084	1.96813e-13	1.49514	1.07194e-24	1.13213	1.19074e-14	0.804055	7.771e-08
ENSRNOG00000007400	Srebf2	-0.626647	2.03085e-13	-0.728274	1.20194e-17	-0.423368	1.36131e-06	-0.149445	0.146358
ENSRNOG00000007434	Ube2j1	-0.632401	2.03193e-13	-0.328193	0.000440089	-0.258681	0.00731433	-0.130695	0.244716
ENSRNOG00000004846	Atp6v1c1	-0.415758	2.03763e-13	-0.46316	4.37407e-16	0.117813	0.0767894	-0.220483	0.000426035
ENSRNOG00000021478	Tpd52l1	-1.62724	2.04131e-13	-1.07221	5.04928e-06	-1.05687	7.48675e-06	-3.78601	1.61459e-71
ENSRNOG00000059911	AABR07026294.1	-0.916991	2.0588e-13	-0.949633	4.95502e-14	-0.911036	8.22032e-13	-0.595272	1.12643e-05
ENSRNOG00000018691	Aurkaip1	0.526822	2.08581e-13	0.287975	0.000138856	0.716354	4.49742e-22	0.340023	9.64836e-06
ENSRNOG00000008517	Cdc42ep1	-1.25735	2.09557e-13	-0.565945	0.00281409	-2.61909	9.54121e-57	-0.652999	0.000627664
ENSRNOG00000016410	Prelid1	-0.785537	2.15117e-13	-0.472107	3.26324e-05	-0.425972	0.000204149	-0.193158	0.148121
ENSRNOG00000052721	Kdm6a	0.869615	2.20206e-13	0.663821	4.61192e-08	0.729962	2.31679e-09	0.408498	0.00153222
ENSRNOG00000036816	Wls	0.810765	2.30655e-13	1.43069	1.19464e-37	-0.405761	0.000343635	1.27666	3.34008e-29
ENSRNOG00000017346	Myt1	1.52791	2.37961e-13	0.375499	0.116921	0.862205	5.76659e-05	0.643736	0.00423921
ENSRNOG00000053288	Ank3	-0.702613	2.38561e-13	-0.536798	4.16995e-08	-0.150375	0.172819	-0.65306	1.56062e-11
ENSRNOG00000011826	Lzts1	-1.11542	2.53307e-13	0.0481442	0.840843	1.54943	4.77936e-23	-1.42071	6.33245e-21
ENSRNOG00000004337	Fam20b	-0.531882	2.55442e-13	-0.463428	4.94091e-10	-0.212297	0.00860755	-0.0448233	0.678003
ENSRNOG00000008258	Fnbp1	-0.935375	2.55629e-13	-0.86317	2.35694e-11	-2.13325	2.00539e-66	-0.791673	1.4547e-09
ENSRNOG00000028504	Socs5	-0.639585	2.64178e-13	-0.587598	4.09766e-11	0.0158528	0.906382	-1.16061	4.44649e-41
ENSRNOG00000018775	Cystm1	1.50304	2.69442e-13	1.30405	5.00744e-10	0.0454747	0.870674	1.01803	4.51419e-06
ENSRNOG00000019127	Zfp606	1.20304	2.70301e-13	0.652603	0.000128437	0.435993	0.013085	0.547834	0.00221111
ENSRNOG00000006689	Chd7	0.788551	2.73628e-13	0.454673	5.44071e-05	0.0652644	0.643095	0.143338	0.285183
ENSRNOG00000029986	Insr	0.46459	2.7478e-13	0.559051	7.60493e-18	1.03861	2.49633e-50	0.802028	4.57154e-31
ENSRNOG00000018606	Olr59	-4.55534	2.8332e-13	-1.90265	0.00503284	-0.231258	0.792576	-1.16151	0.114662
ENSRNOG00000017069	Mark4	-0.798198	2.96687e-13	-1.18501	4.27428e-28	-0.194192	0.133666	-0.334798	0.00696877
ENSRNOG00000017905	Map1lc3b	-0.40789	3.04506e-13	-0.251555	2.1939e-05	-0.610121	1.64516e-27	0.0371364	0.653454
ENSRNOG00000033615	ND3	-0.870415	3.17087e-13	-0.460041	0.000254505	-0.0519407	0.748024	-0.98132	1.66957e-16
ENSRNOG00000003970	Tnpo2	-0.423636	3.19975e-13	-0.38067	1.36698e-10	0.0945072	0.176922	-0.234371	0.00022804
ENSRNOG00000055564	RGD1564664	1.60804	3.2097e-13	1.62365	4.86141e-13	2.43326	3.72885e-24	0.82881	0.000401267
ENSRNOG00000029245	Gpr179	4.01868	3.32806e-13	3.29003	5.35174e-10	2.55459	8.20897e-07	4.15084	1.40426e-11
ENSRNOG00000005933	Yap1	0.960316	3.36256e-13	0.822835	1.18661e-09	-0.0534881	0.761358	0.784793	4.97056e-08
ENSRNOG00000048682	Zwint	-0.440805	3.49116e-13	-0.560223	1.1846e-20	-0.193957	0.0023293	-0.190149	0.00375888
ENSRNOG00000053362	Gabarapl1	-0.48492	3.50332e-13	-0.372156	5.27456e-08	-0.476133	1.20628e-12	-0.451834	3.40342e-11
ENSRNOG00000042501	Tmem250	-0.844089	3.60027e-13	0.125319	0.428568	-0.362195	0.00469099	-0.844053	1.93755e-12
ENSRNOG00000016872	Plppr4	1.05055	3.65527e-13	-0.759091	2.51342e-07	2.87813	1.66075e-87	-0.192111	0.278026
ENSRNOG00000016768	Oprl1	-0.938855	3.68008e-13	-0.95844	2.80995e-13	-1.1886	8.86372e-20	0.187021	0.317328
ENSRNOG00000004067	Nrcam	-0.64869	3.69798e-13	-0.916972	2.52525e-25	0.604441	1.73909e-11	0.218504	0.0294674
ENSRNOG00000007393	Ndrg1	-0.911527	3.70876e-13	-0.852994	1.72542e-11	-3.18011	3.79069e-154	-0.864459	1.32356e-11
ENSRNOG00000012356	Slc36a1	-0.905298	3.75289e-13	-0.380872	0.00563269	0.266008	0.0703016	0.414347	0.00446794
ENSRNOG00000007706	Prkaa2	-1.1192	3.83745e-13	-1.01523	1.29141e-10	0.327253	0.0995604	-0.607441	0.000507748
ENSRNOG00000023020	Fdx2	-1.27545	3.86272e-13	-1.14636	1.84913e-10	-0.295333	0.177174	-0.537861	0.00906923
ENSRNOG00000012031	St8sia2	3.80137	3.90005e-13	1.15472	0.00462876	1.03839	0.0135939	-4.14885e-06	1
ENSRNOG00000010895	Tmem30a	-0.501905	3.95686e-13	-0.392833	3.26894e-08	-0.858541	2.08139e-36	-0.691603	2.26211e-23
ENSRNOG00000023116	Agmo	1.68526	3.96202e-13	1.25197	6.20735e-08	-1.56369	3.29488e-17	0.60309	0.0149836
ENSRNOG00000010365	Syn1	-1.10879	4.04853e-13	-0.626045	9.14034e-05	0.804262	1.99656e-07	0.491588	0.00286204
ENSRNOG00000048800	AABR07031756.2	-0.924513	4.06371e-13	-0.76195	8.59063e-09	-0.735769	5.15046e-08	-0.920567	7.30412e-12
ENSRNOG00000000145	Pik3r3	0.881782	4.1506e-13	1.00469	4.76699e-16	0.509733	5.87484e-05	0.736649	9.33537e-09
ENSRNOG00000029370	Abhd3	-0.585707	4.15862e-13	-0.607596	9.63724e-14	-0.897993	4.59209e-29	-0.34629	8.68189e-05
ENSRNOG00000025344	Enthd1	-4.64074	4.15862e-13	-1.05944	0.193859	0.28763	0.768865	-1.7419	0.0199004
ENSRNOG00000043370	Fubp1	0.784522	4.1841e-13	0.496661	9.59923e-06	0.881163	9.02555e-16	0.686028	8.58205e-10
ENSRNOG00000003384	Hs3st3b1	4.35643	4.2492e-13	3.27611	4.80058e-09	1.74877	0.000733236	3.58866	5.5005e-09
ENSRNOG00000060141	Epdr1	-0.727967	4.34147e-13	-0.25818	0.0235027	-0.968153	4.01655e-22	-0.275893	0.0170193
ENSRNOG00000017404	Pcmtd2	0.578474	4.35529e-13	0.275858	0.00119377	0.948958	4.03086e-31	-0.0455479	0.685241
ENSRNOG00000031053	ND4L	-0.880064	4.39492e-13	-0.624606	5.44398e-07	-0.0715963	0.652692	-1.22282	2.33611e-24
ENSRNOG00000002693	Nme1	-0.704055	4.61361e-13	-0.336492	0.00182334	-0.448778	2.20151e-05	-0.394375	0.000374388
ENSRNOG00000030625	Tf	-1.31567	4.72609e-13	-1.29151	1.49561e-12	-4.1786	6.20198e-125	-1.5085	8.54873e-17
ENSRNOG00000020102	Sirt2	-0.650438	4.73221e-13	-0.55928	9.55114e-10	-1.92691	1.98148e-109	-0.633372	4.49174e-12
ENSRNOG00000005711	Ptprd	-0.677858	4.74101e-13	-0.17985	0.0988531	-0.795137	9.53878e-18	0.109816	0.355624
ENSRNOG00000007869	Wscd1	-0.897993	4.75755e-13	-1.15148	8.99521e-21	-2.45709	1.01163e-93	-1.09495	1.29129e-18
ENSRNOG00000000527	Mtch1	-0.433547	4.76846e-13	-0.647722	9.42677e-28	-0.729919	1.1334e-34	-0.897251	8.64564e-52
ENSRNOG00000007147	Cyp46a1	-0.816127	4.79492e-13	-0.638644	3.30348e-08	1.19101	2.05385e-23	-1.37	6.67213e-35
ENSRNOG00000023348	Tbc1d2	-1.95178	4.89457e-13	-0.567846	0.0856555	-0.719941	0.0221168	0.317818	0.445481
ENSRNOG00000017087	Man1c1	-1.08569	4.95623e-13	-0.608566	0.000161816	-1.38551	2.05624e-20	-1.1835	1.21321e-14
ENSRNOG00000010282	Ninj2	-1.95977	5.11592e-13	-1.44735	4.52681e-07	-3.55613	1.07287e-42	-1.83891	1.08364e-10
ENSRNOG00000001880	Dgcr6	-0.856695	5.45174e-13	-0.518311	4.6598e-05	-0.797158	8.64898e-11	-0.16986	0.286817
ENSRNOG00000019005	Pde8a	-1.12064	5.89539e-13	-0.880551	4.27916e-08	-2.26677	2.3951e-51	-0.902562	3.53254e-08
ENSRNOG00000019207	Shank1	-1.29275	5.95208e-13	-0.605447	0.00157794	2.19668	1.54755e-35	1.05114	9.23442e-09
ENSRNOG00000007133	Plxnb2	0.643252	6.15641e-13	0.609728	1.72207e-11	0.521484	1.12716e-08	0.152303	0.152725
ENSRNOG00000042426	Cyp4v3	0.756013	6.30014e-13	0.96961	2.4662e-19	0.526539	1.7923e-06	1.1339	4.96129e-23
ENSRNOG00000019885	Magi3	-0.584795	6.34362e-13	0.0389605	0.753285	0.0278381	0.81571	0.128132	0.222278
ENSRNOG00000017091	Slc25a46	-0.529021	6.48847e-13	-0.616506	8.03783e-17	-0.390589	5.59884e-07	-0.525309	1.27536e-11
ENSRNOG00000036942	Tnfrsf9	-2.74872	6.494e-13	-0.370657	0.537198	-2.78596	7.8243e-13	-1.43381	0.0017098
ENSRNOG00000009166	Ddx24	-0.469904	6.5493e-13	-0.439631	4.60726e-11	-0.20128	0.00564518	-0.393221	1.66103e-08
ENSRNOG00000017206	Igfbp5	3.33939	6.58377e-13	2.75326	4.99106e-09	0.958973	0.0602073	2.60748	3.61634e-08
ENSRNOG00000011544	Zfp219	0.818813	6.61572e-13	0.933949	1.18008e-15	0.737256	6.21753e-10	0.526415	1.85401e-05
ENSRNOG00000002146	Pkd2	0.835356	6.73374e-13	0.362163	0.00364874	0.734988	7.91779e-10	0.540614	1.20514e-05
ENSRNOG00000011831	Nudt18	-1.11153	6.73518e-13	-0.68502	3.58123e-05	-0.631481	0.00017752	-1.02093	3.474e-10
ENSRNOG00000018927	Sprn	-1.40833	7.14368e-13	-1.93392	1.21857e-23	1.51235	4.21489e-08	-0.245506	0.377457
ENSRNOG00000027204	Map6	-0.781374	7.14368e-13	-0.206953	0.108494	-0.686689	5.29072e-10	-0.0958813	0.521254
ENSRNOG00000007003	Mei1	-2.91869	7.18179e-13	-3.64967	1.09472e-19	1.32309	0.0212981	1.12713	0.0605361
ENSRNOG00000015113	Mocos	1.87677	7.28568e-13	2.34851	1.08763e-16	0.709533	0.00807874	2.08121	3.43159e-12
ENSRNOG00000002094	Atg3	-0.659718	7.29204e-13	-0.518195	5.82868e-08	-0.910136	6.64071e-23	-0.505136	3.54031e-07
ENSRNOG00000024294	AABR07019083.1	2.02713	7.36841e-13	0.378451	0.228668	1.76563	3.05313e-09	1.09865	0.00020287
ENSRNOG00000057499	AABR07068587.1	-1.51808	7.38778e-13	1.77151	7.88041e-10	1.03831	0.000261705	0.0373546	0.924485
ENSRNOG00000021663	Vxn	-2.11641	7.55165e-13	-1.93925	7.08127e-11	-0.689359	0.0314726	-1.02277	0.00117075
ENSRNOG00000029871	Slc8a3	1.37538	7.60656e-13	1.6496	1.33133e-17	0.759597	0.000119706	0.451758	0.0352376
ENSRNOG00000016585	Bmi1	0.759976	7.62075e-13	0.576757	1.21699e-07	0.554989	5.2955e-07	0.45158	8.2089e-05
ENSRNOG00000011414	Psmc3	-0.536096	7.83872e-13	-0.308679	0.00011247	-0.344489	1.38572e-05	-0.316381	0.000118267
ENSRNOG00000016137	Rad23b	-0.474385	7.84783e-13	-0.333043	1.17658e-06	0.023316	0.803909	-0.0619038	0.483623
ENSRNOG00000003359	Ogt	0.55134	8.00186e-13	0.787217	7.01929e-25	1.18342	1.87864e-54	-0.0345404	0.757677
ENSRNOG00000011431	Mfhas1	-0.755959	8.20939e-13	-0.697938	1.20939e-10	0.0527732	0.740782	-0.607765	1.14194e-07
ENSRNOG00000057988	Pfkm	-0.508062	8.32506e-13	-0.43839	1.2109e-09	-0.213891	0.00481332	-0.458953	2.48881e-10
ENSRNOG00000009460	Pdzd8	-0.562026	8.38489e-13	-0.322058	0.000109839	-0.844715	1.6672e-27	-0.538909	2.56118e-11
ENSRNOG00000006803	Dnajc10	-0.529454	8.42311e-13	-0.506752	1.46163e-11	-0.512087	9.86126e-12	-0.412785	1.15515e-07
ENSRNOG00000056643	Cdh8	-0.910085	9.0648e-13	-2.04728	4.38391e-63	-0.363916	0.0110574	-2.955	1.83379e-132
ENSRNOG00000004517	Igf1	2.61238	9.10842e-13	2.52211	9.16874e-12	0.895864	0.0201507	2.70949	8.46956e-13
ENSRNOG00000012536	Sgms1	-0.840344	9.34459e-13	-0.774268	1.06769e-10	-1.0131	9.33182e-18	-0.873176	5.60642e-13
ENSRNOG00000018232	Srf	-0.644365	9.47736e-13	-0.623284	1.28709e-11	0.736524	2.47873e-12	-1.07725	9.40902e-33
ENSRNOG00000009448	Papln	2.79361	9.54535e-13	2.01999	1.81184e-07	1.91939	1.01914e-06	4.34816	2.10788e-17
ENSRNOG00000022893	Rimbp2	-0.718544	1.00169e-12	-1.60319	1.37939e-60	0.922207	1.1229e-17	-0.0544031	0.71356
ENSRNOG00000005323	AABR07064873.1	1.30228	1.06853e-12	0.994719	9.70076e-08	1.59044	2.64622e-18	1.07494	8.79623e-09
ENSRNOG00000013618	Ankrd10	0.958156	1.09616e-12	0.661117	1.86639e-06	0.885117	1.97485e-10	0.514586	0.00038629
ENSRNOG00000005007	Scn3a	0.801809	1.10305e-12	0.662167	7.82162e-09	2.31408	4.80862e-83	-0.354825	0.0032447
ENSRNOG00000028129	Fktn	-0.472465	1.1086e-12	-0.601728	1.13314e-19	-0.89151	3.89314e-42	-0.698661	2.6222e-25
ENSRNOG00000009411	Chn2	0.907762	1.12146e-12	1.03274	1.02645e-15	-0.677293	8.44219e-08	-0.346089	0.0125706
ENSRNOG00000014684	Npr1	1.16463	1.14604e-12	1.44489	4.68979e-18	0.719133	2.09171e-05	1.33369	8.47827e-15
ENSRNOG00000017508	Kmt5c	0.949386	1.14965e-12	0.681778	6.67071e-07	1.11334	4.53255e-16	0.643799	4.78623e-06
ENSRNOG00000013461	Ralbp1	-0.611742	1.2105e-12	-0.399185	1.06324e-05	-0.482517	6.47579e-08	-0.360354	0.000129213
ENSRNOG00000024142	Arglu1	0.472039	1.21455e-12	0.513323	3.5213e-14	0.931897	2.14321e-39	0.0210648	0.8381
ENSRNOG00000061346	B3glct	1.03876	1.21651e-12	0.711355	2.13949e-06	0.902053	7.61596e-09	1.02755	2.07917e-10
ENSRNOG00000036688	Arhgdia	-0.567724	1.21948e-12	-0.451775	3.59115e-08	-1.17951	8.98934e-52	-0.787994	6.54768e-23
ENSRNOG00000033134	Mef2c	-1.2803	1.26479e-12	0.887695	1.82222e-06	3.31416	2.30591e-76	0.911183	9.68542e-07
ENSRNOG00000046791	Sh3rf3	-1.62758	1.28129e-12	-0.841393	0.000797706	0.824707	0.00449595	-0.81666	0.00163633
ENSRNOG00000005929	Them6	-1.3735	1.28882e-12	-0.915617	7.46392e-06	-1.29355	5.50745e-11	-1.19826	3.19871e-09
ENSRNOG00000006919	Clvs1	0.944347	1.29036e-12	0.764654	1.98656e-08	1.22069	4.37038e-18	0.0713757	0.703914
ENSRNOG00000017188	Cyp27a1	1.22851	1.29583e-12	1.96775	2.29608e-25	0.960331	1.3515e-07	2.54074	2.26421e-29
ENSRNOG00000001104	Foxk1	-0.579827	1.29946e-12	-0.370364	2.1205e-05	0.706476	1.32994e-13	-0.459693	2.08981e-07
ENSRNOG00000001470	Limk1	-1.23191	1.30842e-12	-0.30639	0.137792	-1.73153	3.25449e-24	0.362525	0.0774694
ENSRNOG00000061050	Mboat2	0.799102	1.32245e-12	0.564297	1.16683e-06	-0.0444256	0.771862	1.08675	2.09583e-20
ENSRNOG00000002653	Kcnk2	-1.19352	1.32245e-12	0.387599	0.0509232	0.760904	4.64554e-05	-2.6994	1.2086e-61
ENSRNOG00000003065	Glyr1	-0.480123	1.32536e-12	-0.110563	0.17655	0.00316364	0.979296	0.073026	0.412528
ENSRNOG00000011752	Sh3d19	0.823556	1.35906e-12	0.836491	1.32922e-12	-0.138895	0.310168	0.864359	1.07333e-12
ENSRNOG00000039528	Fam32a	-0.54348	1.36619e-12	-0.599599	1.04941e-14	-0.536093	1.85231e-11	-0.619915	1.07583e-14
ENSRNOG00000033445	AABR07049060.1	-1.0479	1.36619e-12	-0.34201	0.0550707	-0.836426	1.20753e-07	0.714205	0.000397518
ENSRNOG00000015401	Mapk4	-0.937729	1.36713e-12	-0.314776	0.0355456	-0.378083	0.0080705	-1.72902	1.22618e-40
ENSRNOG00000000906	Medag	-1.83485	1.39145e-12	-1.21487	1.01693e-05	-0.504351	0.11176	-0.418283	0.226403
ENSRNOG00000005561	Brinp1	-0.994021	1.40882e-12	-0.455888	0.00251093	1.81685	5.49801e-37	-0.111386	0.55671
ENSRNOG00000021528	Tusc2	-0.700957	1.42442e-12	-0.204312	0.0807369	0.429089	0.000127399	-0.0526221	0.727682
ENSRNOG00000003402	Stx6	-0.47517	1.47012e-12	-0.712885	6.41654e-27	0.0561788	0.526536	-0.519669	5.21776e-14
ENSRNOG00000009585	Tcf20	0.463154	1.4816e-12	0.137037	0.0665153	1.2119	9.33138e-70	-0.399632	1.63929e-09
ENSRNOG00000000635	Arid5b	-1.03828	1.49987e-12	-1.09855	9.38178e-14	0.244868	0.172492	-0.358436	0.0365961
ENSRNOG00000005124	Plekhh2	0.749597	1.56723e-12	0.0174913	0.919353	2.15413	4.19677e-70	1.90035	1.54524e-56
ENSRNOG00000010695	Pdgfc	0.993221	1.6038e-12	0.897717	5.4563e-10	1.17614	6.46033e-14	-0.162425	0.342424
ENSRNOG00000003198	RGD1305733	-0.80978	1.63314e-12	-0.427079	0.000448312	0.414042	0.000664737	-0.196225	0.152435
ENSRNOG00000031766	CYTB	-0.874869	1.69688e-12	-0.393379	0.00310174	0.0646553	0.692662	-0.676083	9.0077e-08
ENSRNOG00000055499	Grid1	-0.773397	1.70374e-12	-1.10192	2.34175e-24	-0.847767	3.59265e-14	-1.25983	1.09292e-30
ENSRNOG00000032659	Plcl1	-0.705051	1.70624e-12	-0.660964	7.73291e-11	-2.07815	8.30385e-105	-0.829466	3.39346e-16
ENSRNOG00000062168	AC119762.7	2.53592	1.73875e-12	2.56341	6.48176e-12	2.74568	1.21858e-11	1.60455	1.46714e-05
ENSRNOG00000032002	Hapln1	-0.985405	1.74668e-12	-1.26511	6.78295e-20	0.238062	0.151397	-1.12692	1.10662e-15
ENSRNOG00000007686	Sept3	-0.640775	1.79089e-12	-0.821936	8.19908e-20	1.30877	2.40414e-43	-0.208083	0.0459381
ENSRNOG00000030963	LOC108351137	-0.761025	1.8107e-12	-0.323758	0.00654398	-0.404462	0.000421278	-0.304204	0.0131634
ENSRNOG00000003951	Psmc1	-0.479337	1.8275e-12	-0.266392	0.000250005	-1.03604	1.02736e-54	-0.380405	1.26917e-07
ENSRNOG00000034200	Atp8a1	-0.954332	1.83108e-12	-1.52138	2.62879e-30	-1.29067	3.67339e-22	-1.28187	1.48306e-21
ENSRNOG00000012549	Hs2st1	-0.57226	1.85237e-12	-0.432302	3.16225e-07	-0.461476	5.18491e-08	-0.266214	0.00403272
ENSRNOG00000001329	Gjc3	-1.55484	1.88428e-12	-1.55438	3.43492e-12	-2.32762	4.82495e-27	-1.66721	1.60913e-13
ENSRNOG00000021390	Meis3	0.883706	1.91729e-12	1.10176	1.1483e-17	1.63325	5.16459e-32	0.485787	0.000360292
ENSRNOG00000004959	Actr2	-0.739045	1.93242e-12	-1.13071	7.45215e-28	0.0506737	0.724243	-1.42852	5.91803e-44
ENSRNOG00000009149	Jam3	-0.906195	1.93242e-12	-0.618622	5.317e-06	-2.02717	2.91037e-60	-1.03763	4.07192e-15
ENSRNOG00000015867	Chst9	3.18502	1.95127e-12	-2.66186	2.64305e-21	-2.83261	3.92424e-24	2.73306	2.82428e-08
ENSRNOG00000009318	Ttll5	-0.785348	1.98855e-12	-0.60667	1.27467e-07	-0.844249	4.41223e-14	-0.304262	0.0160891
ENSRNOG00000024135	Zmat1	0.793364	2.00264e-12	0.394766	0.000904309	0.130923	0.333747	0.364408	0.00372419
ENSRNOG00000025198	Gas2l3	3.1674	2.01127e-12	1.93364	2.14185e-05	0.789986	0.102125	1.86473	5.63151e-05
ENSRNOG00000012455	Tardbp	0.480474	2.04014e-12	0.319149	7.1752e-06	0.662172	9.59973e-21	0.166243	0.034281
ENSRNOG00000013238	LOC103693210	-1.69595	2.06803e-12	-1.23643	1.07602e-06	-1.01895	9.46073e-05	-0.898841	0.00105222
ENSRNOG00000010397	Agbl3	1.03315	2.0766e-12	0.393127	0.0130141	0.527252	0.000656985	0.084084	0.680195
ENSRNOG00000039859	Dnmt1	0.829339	2.17673e-12	0.904033	3.35786e-14	1.30707	2.50122e-27	0.975968	9.57685e-16
ENSRNOG00000014199	Zfp703	-0.931086	2.18361e-12	-0.144577	0.423743	0.18066	0.30173	0.24336	0.171675
ENSRNOG00000042502	Smim17	1.29258	2.24148e-12	0.878103	3.28482e-06	-0.539418	0.00355182	0.437866	0.0334383
ENSRNOG00000010185	RGD1306941	-0.773702	2.24229e-12	-0.860949	9.75394e-15	-1.12634	1.99704e-24	-0.828895	8.04275e-13
ENSRNOG00000008332	Smo	1.07682	2.24502e-12	0.257112	0.145607	0.160367	0.382471	1.18763	6.3734e-13
ENSRNOG00000012364	Prickle2	-0.824137	2.25699e-12	-1.19159	8.08806e-25	-0.12229	0.395605	-0.565665	3.64639e-06
ENSRNOG00000009568	Hdac1	1.07566	2.28886e-12	0.957937	8.12298e-10	0.542082	0.0007071	1.2476	6.48168e-15
ENSRNOG00000006204	Slc30a3	-3.01805	2.33579e-12	-2.77821	1.47879e-10	-0.56029	0.270014	1.02392	0.0383273
ENSRNOG00000047339	Pja1	0.394133	2.34339e-12	0.419984	1.7732e-13	0.504637	2.41215e-18	0.0943764	0.166609
ENSRNOG00000054272	Dhx57	0.438836	2.35674e-12	0.310551	1.80971e-06	-0.137862	0.0462384	0.392531	5.63753e-09
ENSRNOG00000043304	Apcdd1	1.00035	2.35996e-12	0.862627	2.77687e-09	1.02833	1.3609e-12	1.59189	1.00833e-26
ENSRNOG00000060988	Kcnc4	-1.6625	2.3893e-12	-1.96199	8.9565e-17	-1.74492	1.40639e-13	0.0325612	0.935652
ENSRNOG00000004268	Zfp386	0.739521	2.39958e-12	0.432961	8.69144e-05	0.388749	0.000462688	0.259261	0.0301625
ENSRNOG00000005039	Tfpi	-0.900554	2.41425e-12	-0.0246729	0.90961	-0.430341	0.00187983	0.173572	0.305868
ENSRNOG00000002449	Maged2	0.611831	2.41721e-12	0.488355	6.26873e-08	-0.554466	4.35697e-11	0.482449	6.61994e-07
ENSRNOG00000023210	Trappc10	-0.392499	2.41727e-12	-0.201069	0.000923724	-0.168871	0.00650437	-0.232403	0.000169261
ENSRNOG00000014647	Cbfb	0.962715	2.43054e-12	0.0847685	0.648845	-0.692112	1.20164e-07	0.239675	0.142294
ENSRNOG00000002749	Spag9	-0.37297	2.44365e-12	0.0707116	0.286545	-0.31914	2.78352e-09	-0.0745503	0.257283
ENSRNOG00000007286	Mdm1	1.05673	2.46299e-12	0.512051	0.00129304	0.652529	3.09154e-05	0.812751	3.518e-07
ENSRNOG00000021101	Sema6c	1.24232	2.51272e-12	0.834724	4.72263e-06	1.70332	1.74051e-19	1.20191	1.42001e-10
ENSRNOG00000002469	Trim7	-2.74003	2.57838e-12	-1.4941	0.000516132	-2.18257	7.45361e-08	0.121155	0.867646
ENSRNOG00000020115	Ilkap	0.625167	2.69469e-12	0.587332	1.85884e-10	0.470359	9.94357e-07	0.481976	1.13137e-06
ENSRNOG00000019629	Lamp1	-0.373556	2.7035e-12	-0.331736	1.02172e-09	-1.67354	5.83134e-235	-0.227618	6.58496e-05
ENSRNOG00000030910	Grik4	-1.12197	2.70751e-12	-2.39018	2.2662e-54	-2.2974	6.54301e-50	-0.455202	0.0150589
ENSRNOG00000018986	Fbxl19	-0.746616	2.7164e-12	-0.310959	0.00870279	0.678723	7.73253e-09	-0.72917	3.5222e-11
ENSRNOG00000019688	Diaph1	-0.493304	2.72154e-12	-0.849328	9.98936e-35	0.0447036	0.658786	-1.08389	2.30056e-54
ENSRNOG00000014482	Slf2	0.587777	2.79296e-12	0.385563	1.00815e-05	1.05442	2.3582e-34	0.0785288	0.476316
ENSRNOG00000016816	Phf2	0.539116	2.82616e-12	0.426246	8.38186e-08	0.639199	3.28621e-15	0.346463	3.77594e-05
ENSRNOG00000003512	Gabra1	-1.03998	2.83627e-12	-0.308895	0.0695499	2.52912	8.4739e-65	0.959596	2.49054e-10
ENSRNOG00000005271	Rapgef5	-0.780541	2.8663e-12	-1.04031	5.34298e-21	-1.05835	7.60454e-22	-0.387337	0.00135226
ENSRNOG00000005470	Atxn3	0.783548	2.86721e-12	0.901432	4.89131e-15	0.783707	3.5373e-11	0.345937	0.00566677
ENSRNOG00000014644	Zic1	2.12453	2.88406e-12	2.06515	1.73738e-11	1.90189	5.29783e-10	1.9878	1.63488e-10
ENSRNOG00000001449	Pom121	-0.685759	2.92267e-12	-0.490823	1.45706e-06	-0.0870288	0.490452	-0.0668269	0.633224
ENSRNOG00000001317	Zfp68	0.677772	2.95912e-12	0.518044	2.13536e-07	0.306186	0.00314465	-0.0651559	0.626246
ENSRNOG00000013557	Lancl1	-0.523899	2.96746e-12	-0.481122	2.46127e-10	0.252032	0.00176076	-0.527093	4.91082e-12
ENSRNOG00000022107	RT1-M6-1	-4.66117	2.98042e-12	-3.95527	6.75382e-09	-0.839706	0.334499	-2.5257	0.000636243
ENSRNOG00000033791	Apc2	-0.444675	2.98688e-12	-0.482186	5.36487e-14	-0.305117	4.13797e-06	-0.184233	0.0104913
ENSRNOG00000009935	Xpo1	0.46697	3.00413e-12	0.17947	0.0147011	0.122181	0.109734	0.278978	0.000117112
ENSRNOG00000007069	Adhfe1	-0.891353	3.05112e-12	-0.439739	0.00156856	-0.907983	2.20702e-12	-0.582577	2.3119e-05
ENSRNOG00000033575	Emid1	-1.35936	3.05694e-12	-0.305088	0.21311	0.035418	0.909733	-1.51694	1.78431e-14
ENSRNOG00000002751	Zdhhc15	1.13817	3.10418e-12	0.569571	0.000711502	0.440512	0.0118213	0.931893	2.45819e-07
ENSRNOG00000042276	Trappc2	-0.922691	3.13116e-12	-1.13595	6.57932e-18	-1.10857	5.20871e-17	-0.78183	1.57713e-08
ENSRNOG00000008865	Stac	3.59945	3.15739e-12	0.188713	0.77599	1.50749	0.00217163	2.89924	5.65876e-08
ENSRNOG00000005277	Ptprv	1.64342	3.36659e-12	2.59041	1.26846e-24	4.58461	9.68892e-38	-0.549135	0.0291614
ENSRNOG00000005342	Rassf5	-2.49806	3.41346e-12	-0.513778	0.243563	-1.25812	0.00076324	-0.16176	0.759911
ENSRNOG00000008035	Cinp	-0.856053	3.41398e-12	-0.601828	3.46217e-06	-0.134471	0.405506	-0.459466	0.00096862
ENSRNOG00000012593	Mmel1	-1.7336	3.64678e-12	-0.804225	0.00478249	-1.85342	2.63901e-13	-0.351046	0.328327
ENSRNOG00000025494	Nsun7	-1.83951	3.70385e-12	-2.53178	1.65634e-22	-1.83685	1.01526e-11	-2.24324	4.25613e-17
ENSRNOG00000004518	Cacnb1	-0.548817	3.70441e-12	-0.525938	5.37042e-11	1.35996	1.09107e-52	-1.22047	3.83399e-56
ENSRNOG00000020456	Nucb2	0.645049	3.74244e-12	0.635397	2.82724e-11	0.480528	1.18666e-06	0.277334	0.00847126
ENSRNOG00000039300	Ahcyl2	0.648999	3.79915e-12	-0.166046	0.126177	0.250114	0.012503	0.837368	1.34689e-18
ENSRNOG00000005996	Lhx6	-3.57696	3.81109e-12	-3.16252	2.31478e-09	0.429458	0.617924	-3.51037	3.44328e-11
ENSRNOG00000001874	Slc7a4	-1.24804	3.88146e-12	-1.8089	7.71686e-25	-0.313199	0.174357	-2.10326	9.62421e-33
ENSRNOG00000024924	Cep19	-0.559187	3.93173e-12	-0.359293	2.89327e-05	-0.564969	1.36432e-11	-0.272883	0.00338311
ENSRNOG00000016879	Ldlrad4	-0.918606	4.04683e-12	0.133093	0.462018	-0.0349477	0.861131	-0.781596	1.51672e-08
ENSRNOG00000027017	Rnasel	-1.13293	4.09549e-12	-0.574328	0.00125551	-0.536128	0.00269354	0.6163	0.00193167
ENSRNOG00000024595	Cers6	1.04395	4.12623e-12	0.418911	0.00977388	2.50629	1.6293e-45	1.25333	5.31688e-15
ENSRNOG00000018184	Tpm1	-0.521906	4.15429e-12	-0.478803	4.29751e-10	-0.0294043	0.784625	-0.567252	2.09809e-13
ENSRNOG00000058898	Nedd4	0.348003	4.15922e-12	0.0394065	0.563415	0.298752	3.75922e-09	-0.132088	0.0173023
ENSRNOG00000007370	Rnf144a	-0.749625	4.26338e-12	-0.458807	6.35398e-05	-0.956286	8.88583e-19	-1.20307	4.49408e-29
ENSRNOG00000000593	Rev3l	1.16523	4.38328e-12	0.508186	0.00505251	1.59321	1.23135e-21	1.28894	2.55768e-14
ENSRNOG00000003835	Slc43a2	-0.57171	4.59749e-12	-0.111738	0.289348	-0.148396	0.132579	-0.0454646	0.71712
ENSRNOG00000036484	AABR07047044.1	3.84325	4.66538e-12	3.02286	5.90278e-09	2.01883	3.80924e-05	-1.79947	4.64613e-07
ENSRNOG00000061304	Atp2b3	-0.677717	4.66669e-12	-1.26933	3.53886e-40	0.124596	0.292376	-0.248152	0.0248062
ENSRNOG00000006076	Steap2	1.00353	4.71671e-12	3.28884	3.28817e-96	0.476744	0.00170035	3.59478	9.26345e-96
ENSRNOG00000011887	RGD1307929	-0.366158	4.72022e-12	-0.545933	1.82675e-25	-0.15241	0.00781802	-0.689234	1.38205e-39
ENSRNOG00000017496	Cnp	-1.03886	4.72022e-12	-0.967426	1.65662e-10	-3.34014	1.34605e-117	-1.22599	2.50228e-16
ENSRNOG00000013946	Rnf149	0.8247	4.78311e-12	0.4938	7.00641e-05	0.813342	1.39958e-10	0.246785	0.076408
ENSRNOG00000022421	Crtc1	-0.843331	4.79684e-12	-0.679164	5.27776e-08	1.12066	3.66547e-18	-0.736679	4.00044e-09
ENSRNOG00000012840	Sparc	0.815331	5.09494e-12	0.442578	0.000372071	-0.720803	8.50028e-10	0.363337	0.00432979
[truncated: 30,885 more rows]

## Sheet: cortex
	gene name	cortex_vs_olfactive_bulb		cortex_vs_hippocampus		cortex_vs_spinal_cord		cortex_vs_striatum
		log2FoldChange	padj	log2FoldChange	padj	log2FoldChange	padj	log2FoldChange	padj
ENSRNOG00000046319	AABR07000046.1	NA	NA	NA	NA	NA	NA	NA	NA
ENSRNOG00000047964	AABR07000089.1	NA	NA	NA	NA	NA	NA	NA	NA
ENSRNOG00000050370	Vom2r6	NA	NA	NA	NA	NA	NA	NA	NA
ENSRNOG00000032365	Vom2r5	NA	NA	NA	NA	NA	NA	NA	NA
ENSRNOG00000040300	Raet1e	0.142391683799811	NA	-0.41378341559468	NA	0.0207464806871825	NA	0.00988631542957722	NA
ENSRNOG00000058808	RF00421	NA	NA	NA	NA	NA	NA	NA	NA
ENSRNOG00000061316	LOC102547056	-0.444138560381053	0.564631179270938	-0.300742633225322	0.784946222977528	-0.710949722034592	0.324108273383624	0.877071909209961	0.312056667037181
ENSRNOG00000050129	AABR07000137.1	-0.272368994446834	0.781821025805982	0.128580283177117	NA	-0.169365669752185	0.865728387719138	0.217829298458074	0.853044734147612
ENSRNOG00000040316	AABR07000145.1	0	NA	0	NA	-0.293320682835653	NA	0	NA
ENSRNOG00000023659	AABR07000147.1	-0.120443058383928	NA	0	NA	0	NA	0	NA
ENSRNOG00000029897	AABR07000156.1	-0.804517909856818	NA	-0.287590172506975	NA	-0.374848096494446	0.670596009279102	0.0396283285693131	NA
ENSRNOG00000042852	AABR07000158.1	-0.636632084539975	0.493708336962565	-0.182627414454276	NA	-0.212057548706073	0.832528829619408	-0.270626375038607	NA
ENSRNOG00000061806	RF00421	NA	NA	NA	NA	NA	NA	NA	NA
ENSRNOG00000055877	AABR07000159.4	-0.174420208173275	NA	0.053710127302975	NA	0.0144625005403198	NA	0.00689181188838293	NA
ENSRNOG00000014303	Lrp11	0.423884248416634	3.98069432102497e-06	0.0595932266373529	0.702785673829585	0.766563756802271	3.69973742257832e-17	-0.108815067114009	0.376832047980153
ENSRNOG00000051899	AABR07000159.1	NA	NA	NA	NA	NA	NA	NA	NA
ENSRNOG00000014330	Pcmt1	1.39693274318269	4.03817014970618e-46	0.236403874847147	0.0505106921634187	-0.0763047579936182	0.55155881233317	-0.0156914613816988	0.938577110106217
ENSRNOG00000049505	Nup43	-0.34451408098621	0.223242591329374	-0.11322234160447	0.811410643455266	-1.15502495415682	2.74130457935432e-06	-0.344917398294581	0.320378688521662
ENSRNOG00000014916	Lats1	-0.561485742241357	1.62292025325868e-13	-0.235572614879728	0.0100929604848463	0.0483278130312729	0.657968553476377	-0.161979501217751	0.0996421785426263
ENSRNOG00000014996	Katna1	-0.492159784454813	0.0321640427356454	-0.181750670594929	0.60776586332587	-0.0274861636358664	0.941216738468523	-0.0823126721643454	0.834618387533411
ENSRNOG00000015239	Ginm1	-0.128936874678748	0.475030123583221	-0.0936546636098617	0.714753322786766	-1.44214437930857	3.76408908520874e-26	-0.198400673670433	0.328127407818838
ENSRNOG00000055508	AABR07000159.3	-0.0604275290109662	NA	-0.180010872327522	NA	0.0267774893867677	NA	-0.268177008228942	NA
ENSRNOG00000053710	AABR07000159.2	NA	NA	NA	NA	NA	NA	NA	NA
ENSRNOG00000015552	Ppil4	-0.147434579780642	0.219914760822083	-0.532471691701611	7.21464159806706e-07	0.873814279398441	5.86163178647222e-15	-0.239529591207927	0.0534351761755832
ENSRNOG00000016041	Zc3h12d	-1.2134543874154	0.0975451231962883	-0.598078786149888	0.573988014386172	-1.58685984962815	0.0249420053309562	0.475493380670665	0.664129960848747
ENSRNOG00000016054	Tab2	-0.3838176674126	4.67717653241214e-05	-0.0675175208729543	0.667213556650377	-0.373185510334512	0.000101189653708026	-0.0891970682350635	0.511883159004584
ENSRNOG00000016381	Ust	-1.08965669515789	1.48199979879189e-08	-0.653870215091682	0.00372729926618012	-0.689339894527463	0.0011576463529905	-1.60376934525059	2.05898504638946e-16
ENSRNOG00000054005	RF00026	0	NA	0	NA	-0.139429091147666	NA	0	NA
ENSRNOG00000059137	AABR07000173.1	NA	NA	NA	NA	NA	NA	NA	NA
ENSRNOG00000013160	Sash1	-0.609991331033457	1.07885779956874e-06	-0.291299877804685	0.0534861726358959	-1.08883080874255	2.33752087782145e-19	0.0183099107324416	0.943227853208746
ENSRNOG00000052788	RF00340	-0.534982358326951	0.59435776602536	-0.496461916521866	NA	0.30856978392341	0.759020119697305	0.27405980983439	0.828985051189312
ENSRNOG00000023549	Samd5	0.707117472211059	0.000435774739916294	-1.04795301083915	6.28268259850127e-08	0.121567194049287	0.644450775764133	-0.813292892455441	5.23508610646148e-05
ENSRNOG00000031859	RGD1560633	0	NA	-0.100181464385011	NA	-0.139429091147666	NA	0	NA
ENSRNOG00000013351	Stxbp5	0.12490708776128	0.256915822818736	-0.15217619682444	0.219628870735939	0.684841867848232	1.68393340331333e-13	0.898730799747619	9.99032833260243e-22
ENSRNOG00000061755	RF00340	0.425803035801985	NA	0.540633061744109	NA	0.261188367213701	0.756618395329849	0.609845477303553	NA
ENSRNOG00000053182	AABR07000200.1	-0.0434972625399348	NA	0	NA	0	NA	0	NA
ENSRNOG00000042741	Adgb	-1.19319710192748	0.0605078919093446	-1.21342426889552	0.0910222681396165	-2.72546986629818	1.84266127706231e-06	-2.21735527467888	0.000261795531706239
ENSRNOG00000014258	Rab32	-1.7738797307436	3.22396846342984e-15	0.934213946704659	0.00539830505131252	-2.19782279036707	6.39977457657114e-22	-1.35690725028665	7.90539687277956e-08
ENSRNOG00000057302	RF00560	NA	NA	NA	NA	NA	NA	NA	NA
ENSRNOG00000014290	Grm1	-2.2157253637371	2.79727734659072e-84	-1.68092708009294	2.07073911448009e-46	0.000626073493611731	1	-1.73068687321472	1.02866605563635e-48
ENSRNOG00000041566	AABR07000220.1	NA	NA	NA	NA	NA	NA	NA	NA
ENSRNOG00000014431	AABR07000222.1	-0.185030690758742	0.868820786724113	-0.911753257505318	NA	-0.652912510160994	0.485271851034965	-0.874562106853828	0.388953978407515
ENSRNOG00000014450	Shprh	-0.246427621264103	0.0369753560603325	-0.321298319511628	0.0102588569209091	0.0936863769602728	0.503872095601312	-0.12589644543959	0.405454126166235
ENSRNOG00000014852	Fbxo30	-0.858941644852047	6.59378872557187e-09	0.135500883311238	0.600696147749063	-0.620788427708982	0.000113993974977149	-0.484768139411394	0.00603135455669502
ENSRNOG00000052274	RF00156	NA	NA	NA	NA	NA	NA	NA	NA
ENSRNOG00000040242	Epm2a	0.256370040836386	0.199131497932175	0.546435555856458	0.00936633026684689	0.816596174583108	6.08552018691768e-05	0.191341654280643	0.464590010767642
ENSRNOG00000054906	RF00560	0	NA	0	NA	0	NA	-0.223945575643596	NA
ENSRNOG00000058048	RF00322	NA	NA	NA	NA	NA	NA	NA	NA
ENSRNOG00000051844	AABR07000248.1	NA	NA	NA	NA	NA	NA	NA	NA
ENSRNOG00000053880	RF00045	NA	NA	NA	NA	NA	NA	NA	NA
ENSRNOG00000011058	Utrn	0.25382844972729	0.0100332483576928	0.999193719723209	2.3512924892328e-27	0.292220665915599	0.00260426812232617	-0.174514075886827	0.118798415830489
ENSRNOG00000014902	Stx11	0.0417730494710075	0.959816110769915	0.0988265841374857	0.928863370484389	0.138592645805772	0.858855352378681	0.583153913249171	0.450492391435618
ENSRNOG00000014908	Sf3b5	-0.0328927325665496	0.925327381853198	-0.335924645195416	0.293099959689913	-0.554990555984999	0.0272138488072884	-0.680418449814204	0.00862365146281112
ENSRNOG00000036310	AABR07000257.1	NA	NA	NA	NA	NA	NA	NA	NA
ENSRNOG00000025587	Plagl1	-3.84127065077888	3.20754340716442e-38	-2.5443440937203	3.27910070616279e-16	-1.97551431226033	2.79961763465509e-10	0.0413446977261056	0.956265321803887
ENSRNOG00000042705	Zc2hc1b	0.253129411168184	NA	0.18347404061146	NA	-0.0877423876695482	NA	0.00967785113632708	NA
ENSRNOG00000043188	AABR07000261.1	NA	NA	NA	NA	NA	NA	NA	NA
ENSRNOG00000015217	Ltv1	-0.0672514574533772	0.673741067413472	-0.0781060026237175	0.706046774160811	-0.166820459065772	0.246598906111117	0.0850402688636657	0.661805114333596
ENSRNOG00000015473	Phactr2	-2.59638525882951	2.49540722548962e-30	-0.942087320282509	0.000346686571789427	-1.3526468436921	1.95079205982725e-08	0.981270618512185	0.00120555931769429
ENSRNOG00000015551	Fuca2	0.676363149279067	6.41224132333114e-08	0.21718657712008	0.195373190627765	-0.890035776825085	1.0117041664671e-13	0.498541494647793	0.000748965135888
ENSRNOG00000015660	Pex3	-0.0800615398252717	0.644516212665044	-0.149913805031147	0.438025312682941	-0.202434394376806	0.185948299152286	0.00782834044385726	0.982412483056308
ENSRNOG00000046983	Adat2	-0.0595529652598933	0.913210458604926	-0.136909937136562	0.843909641342728	0.278741497736073	0.571773656849715	-0.0182079664378056	0.986584732521152
ENSRNOG00000016624	AABR07000276.1	-0.410096198835134	NA	0.129759235427717	NA	-0.206112224208191	0.835908808750676	-0.311549860025508	NA
ENSRNOG00000010753	Aig1	-0.458862630050254	3.19982919614569e-07	-0.432702960547082	9.59574333771599e-06	-0.566978534125714	1.33633349491004e-09	-0.0977875300830007	0.481560605564146
ENSRNOG00000011015	Hivep2	0.398034552165299	6.00507401972159e-07	0.524862144595391	8.74049007321315e-11	2.94841758940369	1.40038158149384e-292	0.799126528213071	2.62803953928358e-24
ENSRNOG00000011399	AABR07000292.1	0.109041582383127	NA	0.130655923146968	NA	0.0914082963843132	NA	0.0838376077323764	NA
ENSRNOG00000011411	Adgrg6	0.00802221412091399	0.974973973189796	0.247722106612052	0.2293739803739	-0.789834518227456	1.36271176633095e-07	-0.0558051022516273	0.834715632651202
ENSRNOG00000011540	Vta1	-0.0122804336297581	0.922134121878722	0.0267326070975247	0.872036695235632	-0.473306339957784	2.35151393794461e-08	-0.106215098755515	0.370265908995135
ENSRNOG00000012092	Gje1	NA	NA	NA	NA	NA	NA	NA	NA
ENSRNOG00000012103	Nmbr	0.0277767995747321	0.971610473145787	-0.680381489594359	0.272963473790513	-0.215290488934224	0.736802186416438	0.84548703091895	0.187583419187205
ENSRNOG00000059930	RF00560	NA	NA	NA	NA	NA	NA	NA	NA
ENSRNOG00000059032	AABR07000325.1	-0.120443058383928	NA	0	NA	0	NA	0	NA
ENSRNOG00000056005	RF00066	NA	NA	NA	NA	NA	NA	NA	NA
ENSRNOG00000055342	RF00066	NA	NA	NA	NA	NA	NA	NA	NA
ENSRNOG00000047798	AABR07000332.1	NA	NA	NA	NA	NA	NA	NA	NA
ENSRNOG00000059769	AABR07000356.1	NA	NA	NA	NA	NA	NA	NA	NA
ENSRNOG00000047193	LOC108349829	0	NA	0	NA	-0.139429091147666	NA	0	NA
ENSRNOG00000060990	AABR07000382.1	-0.0434972625399349	NA	0	NA	0	NA	-0.146999779799603	NA
ENSRNOG00000058425	AABR07000385.2	-0.160841782756754	0.770660952085968	0.0431059850508664	0.963114592460084	0.146725842803899	0.800371931731234	0.345829360209333	0.57839236459887
ENSRNOG00000055421	AABR07000385.1	NA	NA	NA	NA	NA	NA	NA	NA
ENSRNOG00000051831	RF00002	-0.47685385633962	0.532712234425508	-0.0495416796782809	0.97158221373696	1.68331576186899	0.00741430386983179	1.03110861703904	0.157073755950047
ENSRNOG00000052007	RF01518	NA	NA	NA	NA	NA	NA	NA	NA
ENSRNOG00000061685	RF01518	NA	NA	NA	NA	NA	NA	NA	NA
ENSRNOG00000047746	AABR07000398.1	-0.74631663500613	0.259209134071966	-0.0668494930393806	0.95901291322943	0.613056243733884	0.399092065959371	1.34667813439898	0.0667906161783795
ENSRNOG00000053888	RF00002	0	NA	-0.100181464385011	NA	0	NA	0	NA
ENSRNOG00000055836	AABR07000402.1	-0.222373209095689	0.66959212438602	0.287749324150939	0.650548457433529	1.02919126846451	0.0129160975630595	1.4237502433427	0.000765667580772499
ENSRNOG00000060657	AABR07000404.1	-0.541005147764821	0.587492162384903	-0.193885788657446	NA	0.43636196412647	0.649612501499696	0.419124481715988	0.714370627268979
ENSRNOG00000059898	LOC100909599	-0.282273839850671	0.78943515967217	0.291389259117485	NA	0.459088345346985	0.623014006453589	0.730673303080063	NA
ENSRNOG00000055789	AABR07000411.1	0.238862622152571	0.82371851917358	1.00126326624417	0.345632246392556	0.928090006658258	0.295862777076427	1.10394413750077	0.251143821866976
ENSRNOG00000062232	Mcc	NA	NA	NA	NA	NA	NA	NA	NA
ENSRNOG00000055660	AABR07000433.1	-0.0434972625399347	NA	0	NA	0	NA	0	NA
ENSRNOG00000060284	AABR07000436.1	-0.180479917705828	NA	0	NA	0	NA	0	NA
ENSRNOG00000056019	AC128394.2	NA	NA	NA	NA	NA	NA	NA	NA
ENSRNOG00000059861	AC128394.3	NA	NA	NA	NA	NA	NA	NA	NA
ENSRNOG00000056940	Cited2	-1.11296331811258	1.12367439661528e-19	0.391686061685703	0.00970704490787962	0.980813516144619	1.12350652160307e-12	0.53991715577463	0.000193936641362258
ENSRNOG00000055972	AC128394.1	NA	NA	NA	NA	NA	NA	NA	NA
ENSRNOG00000060021	Txlnb	0.896133565326486	0.092386663550329	0.0946711762282568	0.923145426063139	-0.845049740711351	0.0951723487912804	0.258346609945135	0.746224467036683
ENSRNOG00000060610	AABR07071848.1	-0.0434972625399349	NA	-0.100181464385011	NA	0	NA	0	NA
ENSRNOG00000060972	Heca	0.368338988551016	0.000121960965026315	-0.0368227552263514	0.836664185983753	0.0270207441996462	0.846912986692227	0.102802490619296	0.446347418082286
ENSRNOG00000051450	Abracl	0.238600299093887	0.1430867714741	-0.323598074888195	0.0635933493888185	0.820669847752896	1.25125689510246e-06	-0.094294422285364	0.692023713921262
ENSRNOG00000059224	Reps1	0.428077677345588	6.00549944697625e-06	-0.274631195768255	0.0103820973452446	0.0644092709355895	0.617901209280191	0.425434232357824	0.000101216283373772
ENSRNOG00000055142	Ect2l	-0.592739566805778	0.400086006423597	-0.500696596899122	0.58571472169595	-0.988287380550473	0.125393807889003	-0.582241918810546	0.474713987987927
ENSRNOG00000052189	AABR07000452.1	-0.410088033043258	0.693338336265113	-0.291396134025844	0.838736408485604	-0.268159285196402	0.798636113560527	-0.25397777527856	0.846822643890294
ENSRNOG00000053331	AABR07000451.1	0.371258377522023	0.692672387449721	-1.10749461047006	0.210511767284092	0.0613390484641302	0.958048617281617	0.375099858121376	0.743939972362054
ENSRNOG00000053347	Ccdc28a	0.554372102587366	0.000194134883919999	0.0888747502713574	0.729287859977367	-0.564538629932252	0.00013419990874724	0.285893028762336	0.138747456715674
ENSRNOG00000059393	RF00026	NA	NA	NA	NA	NA	NA	NA	NA
ENSRNOG00000060603	Nhsl1	0.449859997596666	9.45484858200008e-06	-0.892160918961715	2.93920256189952e-20	0.176555681622718	0.139566097817944	0.49025167533233	1.86252281653789e-05
ENSRNOG00000053735	Hebp2	2.29528910033153	1.53247974672763e-10	0.214595409192267	0.696129513912569	-2.05451654687221	3.57684875829541e-12	2.62223529204578	1.09403323654181e-08
ENSRNOG00000053184	AABR07000458.1	NA	NA	NA	NA	NA	NA	NA	NA
ENSRNOG00000011460	Arfgef3	0.905839418657606	0.132561625177751	0.572061321796076	0.466153734131309	0.804431761190252	0.18003173347564	1.65476434136078	0.00400348381545065
ENSRNOG00000025799	RGD1560303	NA	NA	NA	NA	NA	NA	NA	NA
ENSRNOG00000011994	Perp	-0.176541803696735	0.742531994776568	-2.64174127003278	9.01554537463528e-13	-0.00169725842451483	1	1.13384849040635	0.0386780948215262
ENSRNOG00000049517	Tnfaip3	0.915436053436842	0.000255991392457889	0.0639363251039578	0.89344070484463	0.585054850519404	0.0350272568462288	-0.125935594749127	0.751070820978673
ENSRNOG00000058088	LOC102550206	NA	NA	NA	NA	NA	NA	NA	NA
ENSRNOG00000054373	AABR07000484.1	0	NA	0	NA	0	NA	-0.146999779799603	NA
ENSRNOG00000012057	Olig3	0	1	0	1	-0.680637933977918	0.158559011351997	0	1
ENSRNOG00000053291	AABR07000493.1	-0.0434972625399347	NA	0	NA	0	NA	-0.146999779799603	NA
ENSRNOG00000012074	Ifngr1	-0.133266406709986	0.447072249701611	0.11290257605329	0.625877853127613	-0.417824714690395	0.0047663340025716	-0.140190090046703	0.486451870712017
ENSRNOG00000012259	Il22ra2	-0.650931791381509	0.282488987692145	0.0814427316484501	0.944236017824702	-1.68087350803085	0.00136061229285898	-0.0104730491119555	0.997449310505159
ENSRNOG00000012286	Il20ra	-3.04941541299214	2.64693919363729e-05	0.371075589114739	0.787711880372323	-1.71562006500913	0.0296427061657597	-1.24190205781557	0.177188075671313
ENSRNOG00000057719	AC136053.1	NA	NA	NA	NA	NA	NA	NA	NA
ENSRNOG00000012311	Slc35d3	-2.60467292389895	3.68928973631504e-36	0.259422327571811	0.466581305478751	-0.611856731870308	0.0131117653909123	-2.78026162654088	1.12535894251755e-39
ENSRNOG00000012322	Pex7	0.167864749224204	0.570723248800983	0.00330462606904183	0.997894103570759	-0.593200651745085	0.0156720031685762	-0.249907925497561	0.450492391435618
ENSRNOG00000031700	Map3k5	1.25912461450738	1.9749657735641e-11	0.204942090837129	0.466581305478751	1.04315485626164	9.125399140921e-08	0.995640840679756	7.93212601524167e-07
ENSRNOG00000054452	RF00406	NA	NA	NA	NA	NA	NA	NA	NA
ENSRNOG00000012701	Map7	-0.183914979872714	0.273359591939399	-0.62430074130751	2.98624373751342e-05	-1.39627484760185	9.24744951976246e-25	-0.039942823383747	0.874933385734647
ENSRNOG00000053505	RF00026	NA	NA	NA	NA	NA	NA	NA	NA
ENSRNOG00000058050	Bclaf1	-0.460392777551494	1.15749728162415e-07	-0.156009524510261	0.171230604888081	0.417945550074725	3.20608995403635e-06	-0.166245564934859	0.118031556169763
ENSRNOG00000013436	Pde7b	1.29018710124877	6.99815110642033e-20	0.609033955565911	9.37291014662947e-05	1.35208347587124	2.9153516212324e-18	-2.21152036267592	5.42284305869466e-64
ENSRNOG00000058518	RF00403	NA	NA	NA	NA	NA	NA	NA	NA
ENSRNOG00000053617	AABR07000523.1	-0.0434972625399348	NA	-0.100181464385011	NA	0	NA	0	NA
ENSRNOG00000013969	Ahi1	-0.531501085749908	6.45080773098902e-05	-0.534048808508328	0.000148908267324172	-0.444385687633079	0.00105583607404579	-0.540695523331694	9.04253945593629e-05
ENSRNOG00000055858	Myb	0.565499358857871	0.400039966077701	-0.748316296426695	0.30889984041884	-1.26352008833148	0.0255429413157482	-2.39631316763883	7.21827495556668e-06
ENSRNOG00000014531	Hbs1l	0.423258296502086	8.2273680935299e-05	0.139685293058035	0.352272669009598	-0.489995031796789	3.76787706094803e-06	0.140156601138161	0.322741016147015
ENSRNOG00000014907	Aldh8a1	-1.6998066130371	0.00986260017099442	-0.34386301904115	0.764203176002566	-0.0366549359012552	0.975267322708021	0.376744550188309	0.724319894354673
ENSRNOG00000052464	AABR07000533.1	NA	NA	NA	NA	NA	NA	NA	NA
ENSRNOG00000058612	RF00026	NA	NA	NA	NA	NA	NA	NA	NA
ENSRNOG00000048762	AABR07000534.1	NA	NA	NA	NA	NA	NA	NA	NA
ENSRNOG00000058363	RF00009	NA	NA	NA	NA	NA	NA	NA	NA
ENSRNOG00000014979	Themis	-0.422482111888195	NA	-0.121526496140587	NA	0	NA	0	NA
ENSRNOG00000055971	AABR07000544.1	NA	NA	NA	NA	NA	NA	NA	NA
ENSRNOG00000047605	Ptprk	0.596544271692287	5.14307363488142e-06	0.754488945471044	2.08775611930426e-08	1.70657022797168	7.22884794978623e-39	2.02974825790061	9.19785101160338e-52
ENSRNOG00000046617	LOC103690149	-1.23435209057295	2.65794145138352e-06	-1.26717103715252	6.65954480985227e-06	-2.17645731609439	1.55829579509287e-17	-1.63146722912458	2.00796583829795e-09
ENSRNOG00000047754	AABR07000574.1	NA	NA	NA	NA	NA	NA	NA	NA
ENSRNOG00000028519	AABR07000581.1	NA	NA	NA	NA	NA	NA	NA	NA
ENSRNOG00000011134	Lama2	-1.27017091599337	1.88571242327987e-07	0.180110022982636	0.664194773336655	-0.913876877948423	0.000280813663625003	0.34013804378007	0.303354734970284
ENSRNOG00000046438	AABR07000583.1	NA	NA	NA	NA	NA	NA	NA	NA
ENSRNOG00000057281	RF00026	-0.12377344719339	NA	0	NA	-0.139429091147666	NA	0	NA
ENSRNOG00000058772	RF00026	NA	NA	NA	NA	NA	NA	NA	NA
ENSRNOG00000011245	Arhgap18	0.630645593170137	0.0149483639946434	0.614622359077969	0.0360856304713998	-0.537220117146331	0.0389913664749714	-1.4530711482697	1.22955649665799e-09
ENSRNOG00000030796	AABR07000595.1	NA	NA	NA	NA	NA	NA	NA	NA
ENSRNOG00000051380	LOC102554576	-0.848455698256886	0.358810734241811	0.566678168749278	0.650432585156435	0.301587100198782	0.76975751456594	-0.385541485973334	0.751667872609523
ENSRNOG00000011720	L3mbtl3	-0.0348675348346052	0.874022654220072	-0.0226615756704433	0.945267197163318	0.928148435035079	3.73988573916484e-08	0.289394392908567	0.140740890564822
ENSRNOG00000033517	LOC100360791	-0.169970630647831	0.702830277734466	-0.0353277069663534	0.963694284680085	-0.466676540727138	0.236547664955076	-0.307217828008893	0.538698632773625
ENSRNOG00000039955	Samd3	-2.78857579137247	0.000325683376248624	0.181614174525773	0.900843296911608	0.0653128983333685	0.956511277343862	-0.247682728184271	0.843761768579697
ENSRNOG00000050801	AABR07000629.3	-1.12963498209044	0.119953348445543	-0.221523356605175	0.861554327591915	0.87075563778826	0.294414698022684	0.41842024666828	0.699548144188172
ENSRNOG00000049569	AABR07000629.2	0.512859107088615	NA	0.458029715548443	NA	0.176020152457406	NA	0.394898834005854	NA
ENSRNOG00000047783	Tmem200a	1.29101242260594	2.95732508646453e-06	-0.337381914339622	0.382311004869925	2.65840402002662	2.57905900274527e-18	2.45796461147003	1.1271110702651e-15
ENSRNOG00000011855	AABR07000629.1	NA	NA	NA	NA	NA	NA	NA	NA
ENSRNOG00000053931	RF00548	0.450559717615681	NA	0.0573915863008446	NA	0.286879233541518	NA	0.125726331963378	NA
ENSRNOG00000026462	RGD1559962	0.110394329148052	NA	0.0537101273029751	NA	0.01446250054032	NA	-0.0700539839556101	NA
ENSRNOG00000056218	AABR07000639.1	0.213753711101827	NA	-0.0782202120581534	NA	0.147447562369115	NA	0.139876873717178	NA
ENSRNOG00000047821	Smlr1	NA	NA	NA	NA	NA	NA	NA	NA
ENSRNOG00000012346	Epb41l2	0.183344404647274	0.027626298221006	0.258679863564427	0.00324143828027892	-0.83536898343879	2.04255446253287e-29	-0.748666121030959	4.28543567771933e-23
ENSRNOG00000013202	Akap7	0.0746466677241372	0.802751212284673	0.103534154226126	0.791840523823692	0.495542498728106	0.0398558933791752	0.657524697555731	0.00897475199341678
ENSRNOG00000055111	LOC100364016	0.222330447470233	0.802387590521876	-0.20284935440417	0.866879814016658	0.0486426346062814	0.9635903073308	-0.756013023498327	0.36575424325379
ENSRNOG00000054921	RF00560	0.214994385100213	NA	0.255621493622409	NA	-0.00281705108519399	NA	0.19506091780453	NA
ENSRNOG00000053999	AABR07071851.2	NA	NA	NA	NA	NA	NA	NA	NA
ENSRNOG00000052696	AABR07071851.1	NA	NA	NA	NA	NA	NA	NA	NA
ENSRNOG00000013304	Arg1	-1.64575407461799	1.48585702482209e-07	-2.34579621616888	8.17855563043038e-14	-1.92990849979354	1.47017618119866e-09	-0.512922383424005	0.267588364697821
ENSRNOG00000013422	Med23	-0.555756111988222	5.44790881509937e-08	-0.143800396363713	0.331686953515861	0.272709147169722	0.0205012882381845	-0.183612543026895	0.167904803853333
ENSRNOG00000013791	Enpp3	-0.854819276349091	0.0197709882559888	0.159529356832588	0.817028588835005	-1.06143242833264	0.00403105428439127	-0.504582539447904	0.292640202302632
ENSRNOG00000053913	AC127189.1	NA	NA	NA	NA	NA	NA	NA	NA
ENSRNOG00000013994	Enpp1	-1.26217302979191	1.80895197046092e-08	0.178574749385145	0.646374596756949	-1.03601485096121	7.71227100597349e-06	0.0639294468328663	0.883452616481399
ENSRNOG00000015036	Ctgf	-0.690803500267371	0.164714118126489	0.847396272300577	0.122433656523032	0.410439425374402	0.441025345105657	-0.00756555964228676	0.997636152369384
ENSRNOG00000015321	Moxd1	0.975533536429474	0.0861194577704709	0.208005533792259	0.826265302707922	2.83248938393249	2.92519997837689e-08	-0.00655789817789747	0.999406535612547
ENSRNOG00000015670	Stx7	-0.0381978687527568	0.868372563472045	-0.242813577443344	0.261180827733601	0.00952725121561436	0.973994833783962	-0.0510257892480331	0.860924988555538
ENSRNOG00000026096	Taar9	0	NA	0	NA	-0.139429091147666	NA	0	NA
ENSRNOG00000056705	Taar8c	NA	NA	NA	NA	NA	NA	NA	NA
ENSRNOG00000048934	LOC108348200	NA	NA	NA	NA	NA	NA	NA	NA
ENSRNOG00000030414	LOC108348200	NA	NA	NA	NA	NA	NA	NA	NA
ENSRNOG00000039872	AC128759.1	NA	NA	NA	NA	NA	NA	NA	NA
ENSRNOG00000048072	Taar7h	NA	NA	NA	NA	NA	NA	NA	NA
ENSRNOG00000052726	AC128759.2	NA	NA	NA	NA	NA	NA	NA	NA
ENSRNOG00000048265	Taar7g	NA	NA	NA	NA	NA	NA	NA	NA
ENSRNOG00000046903	Taar7e	NA	NA	NA	NA	NA	NA	NA	NA
ENSRNOG00000045914	Taar7d	NA	NA	NA	NA	NA	NA	NA	NA
ENSRNOG00000047825	Taar7c	NA	NA	NA	NA	NA	NA	NA	NA
ENSRNOG00000046302	Taar7b	0	NA	0	NA	-0.21637488699166	NA	0	NA
ENSRNOG00000016095	Taar7a	NA	NA	NA	NA	NA	NA	NA	NA
ENSRNOG00000016089	Taar6	NA	NA	NA	NA	NA	NA	NA	NA
ENSRNOG00000039869	Taar5	NA	NA	NA	NA	NA	NA	NA	NA
ENSRNOG00000029877	Taar4	NA	NA	NA	NA	NA	NA	NA	NA
ENSRNOG00000025982	Taar3	NA	NA	NA	NA	NA	NA	NA	NA
ENSRNOG00000025951	Taar2	NA	NA	NA	NA	NA	NA	NA	NA
ENSRNOG00000016073	Taar1	NA	NA	NA	NA	NA	NA	NA	NA
ENSRNOG00000016219	Vnn1	-0.0218351951967539	0.987240870761981	0.840666025717973	0.422433843684218	-1.03540189113192	0.193100226552452	1.3328445662375	0.134184264902522
ENSRNOG00000039865	Vnn3	NA	NA	NA	NA	NA	NA	NA	NA
ENSRNOG00000016371	Slc18b1	-0.454894602095897	0.000914700993245401	-0.503617126670894	0.00079089787762366	-0.145905179352526	0.416341372912887	-0.675214207719729	3.54682479890268e-06
ENSRNOG00000060376	LOC100910237	-0.285992117389416	0.768026331113488	-0.399776410725651	0.744333037500544	-0.266459144915307	0.782386969434656	0.132422451285828	0.924182730394172
ENSRNOG00000016411	Rps12	-0.175968124153969	0.0805662543462757	-0.00870828070958848	0.96791496392582	-0.367590211369967	9.83242388290092e-05	-0.359228017930698	0.000276394409761101
ENSRNOG00000057952	RF00186	-0.0991009246461503	0.920130270516924	0.17847505827512	0.892116421966846	0.0671664182766582	0.951666711139203	-0.483061059475272	0.627413148660808
ENSRNOG00000061678	RF00609	0	NA	0	NA	0	NA	-0.377837167331583	NA
ENSRNOG00000054517	RF00438	-0.0421393768890514	0.967156663993474	-0.0255029640402373	0.988544268507737	0.290183842715945	0.739946016277965	-0.359257577135397	0.71315410937835
ENSRNOG00000016627	Eya4	1.80660798764569	7.83970018503621e-14	1.34664504445313	2.17422966909239e-07	-0.114224818503595	0.718739865928783	1.17258671356014	1.26372130688537e-05
ENSRNOG00000048248	LOC100910446	-0.234183494031336	NA	0.115178567974817	NA	0.33934477099846	NA	0.120199874953735	NA
ENSRNOG00000016700	Tcf21	0	NA	-0.100181464385011	NA	0	NA	0	NA
ENSRNOG00000011114	Tbpl1	-0.178964838149748	0.2912539527367	-0.109052442602884	0.64583533386528	0.592848971565037	0.00012269982149039	-0.131553795680157	0.53215636753271
ENSRNOG00000011161	Slc2a12	-1.24799093674931	0.000322524589533513	0.651404073676997	0.14325982845943	0.105765961509916	0.82962434890557	0.425418757488102	0.362763808545801
ENSRNOG00000051597	AABR07000714.1	NA	NA	NA	NA	NA	NA	NA	NA
ENSRNOG00000057722	AABR07000714.2	-0.978186724554109	0.236313765702964	-0.476040199181275	NA	-0.872331513074954	0.273764246396548	-0.437093178332829	NA
ENSRNOG00000011815	Sgk1	0.899330727261139	0.0059752519490911	-0.313742198642899	0.502209726938316	-0.413852061152308	0.248064727510975	-0.356434995126363	0.391546484936043
ENSRNOG00000059690	RF00603	0.159560621930117	NA	0.0548398040932183	NA	0.113905967984633	NA	0.237720727379769	NA
ENSRNOG00000051379	RF00026	0	NA	-0.100181464385011	NA	0	NA	0	NA
ENSRNOG00000059251	LOC100365542	0.110394329148052	NA	0.053710127302975	NA	0.0144625005403199	NA	0.00689181188838308	NA
ENSRNOG00000061761	AABR07000723.2	NA	NA	NA	NA	NA	NA	NA	NA
ENSRNOG00000056881	LOC102546868	NA	NA	NA	NA	NA	NA	NA	NA
ENSRNOG00000055637	AABR07000725.1	NA	NA	NA	NA	NA	NA	NA	NA
ENSRNOG00000058047	AABR07000733.1	0.103398747946633	0.929774533322872	0.482015599160634	0.711319782670393	-1.54271837550929	0.0615907614303109	0.231257396616956	0.861785088891971
ENSRNOG00000052999	AABR07000738.1	-2.04495856144077	0.0105781123179346	-0.342831916649711	0.805844429491456	-1.40495405967553	0.09281911024004	-0.424456833200904	0.722191406912009
ENSRNOG00000048976	LOC501467	-0.900402986793533	0.196485875460665	-0.190806614793409	0.874417922457478	-1.81474137409081	0.00368914986385344	0.00916355958418333	0.998926285606928
ENSRNOG00000048796	AABR07000740.1	-0.087853547736125	NA	-0.694418084533618	NA	-0.15857928868025	NA	0.0243871402833258	NA
ENSRNOG00000054246	LOC679711	-1.38085539804842	0.0282616667477368	-1.03624889157141	0.187183613034906	-1.44254437326254	0.0248183841685126	-0.652321782870293	0.45279023897609
ENSRNOG00000012122	Clvs2	0.10063240781042	0.575388248070778	0.175032852685418	0.382492847684939	1.10383822694856	1.31204548700281e-13	0.827255189547207	5.82599005909147e-08
ENSRNOG00000062105	AABR07000765.1	NA	NA	NA	NA	NA	NA	NA	NA
ENSRNOG00000062163	AABR07000765.3	-0.490957337094323	0.596427097343937	-0.470852873166131	NA	-0.29490942008248	0.749354441443996	-0.619804857356804	NA
ENSRNOG00000062138	AABR07000765.2	-0.743756181875029	0.419989417655419	0.336202011282398	NA	0.795065845919993	0.381500030837562	0.780511683352357	0.452086898179652
ENSRNOG00000012609	Trdn	-7.20840756675106	4.33835343854487e-160	-0.0742437335209012	0.925116328587065	1.70034861729187	0.00275161746150543	-0.250394972547495	0.688907050789919
ENSRNOG00000058582	RF00026	NA	NA	NA	NA	NA	NA	NA	NA
ENSRNOG00000029608	Nkain2	-0.0136079078468849	0.949251371809228	-0.250810732816584	0.142648126298153	-0.785936572689445	2.39654189573078e-09	-0.531383597179684	0.000183379213133826
ENSRNOG00000052712	RF00560	NA	NA	NA	NA	NA	NA	NA	NA
ENSRNOG00000057890	RF00015	-1.84247640923691	0.0234559785958571	0.0895117511877617	0.958312294103804	-0.771004070921628	0.402062587585369	-0.408787050943292	0.734527440402683
ENSRNOG00000056670	AABR07000902.1	-0.762873469825969	0.418747737626299	0.117758611001757	NA	0.473447794588432	0.621482341541224	-1.07887494983009	0.266244737805246
ENSRNOG00000013323	Rnf217	0.0533052844227879	0.859694032764515	0.412179829630773	0.133659041492577	0.912458162121535	0.000112951578684814	0.142936037712406	0.672472413480365
ENSRNOG00000021478	Tpd52l1	1.62723652775734	2.04130593059846e-13	0.555023174068296	0.0350057088871761	0.570361687772352	0.0180685301582328	-2.15876989378217	1.29888725280933e-25
ENSRNOG00000021442	Hddc2	-0.0265999921226869	0.926223023222941	-0.0663915669226433	0.858541645534104	-0.10808364598798	0.6887601787744	-0.534967886281204	0.0153641791008766
ENSRNOG00000041720	RF00001	NA	NA	NA	NA	NA	NA	NA	NA
ENSRNOG00000013364	Hey2	-1.02401219939067	2.71239356081787e-08	0.460843662453454	0.0550992308978042	-1.42920387682142	5.73388101851282e-15	0.606660475036497	0.00880018074304165
ENSRNOG00000014004	Ncoa7	0.558252443754279	2.01932339603395e-11	-0.256239082556626	0.00739459829700646	0.130414607265988	0.188163648730793	-0.132760522647189	0.22201711833139
ENSRNOG00000045369	RF00001	-0.601394771554374	NA	-0.298608451586862	NA	0.0172352870946363	0.991798111125244	0.249146861169187	NA
ENSRNOG00000014190	Hint3	0.883629169773187	0.000986462080696533	0.229309999626968	0.575052275953948	-1.02747621418184	5.78211538578726e-05	0.109630298308567	0.804987609380462
ENSRNOG00000014240	Trmt11	-0.361905098653718	0.136354077725883	0.212070521338023	0.562914132574854	-0.513689666071515	0.0369761566477406	-0.189973257936389	0.587663411096524
ENSRNOG00000042944	Cenpw	0.247521427937204	0.816963558986416	0.905487188740257	0.407073247649724	-0.317014915138789	0.755782712135979	-1.13461628437414	0.226641263574255
ENSRNOG00000060033	RF00560	NA	NA	NA	NA	NA	NA	NA	NA
ENSRNOG00000050157	AABR07000968.1	NA	NA	NA	NA	NA	NA	NA	NA
ENSRNOG00000056383	RF00015	NA	NA	NA	NA	NA	NA	NA	NA
ENSRNOG00000061372	AABR07000968.2	NA	NA	NA	NA	NA	NA	NA	NA
ENSRNOG00000056484	AABR07000978.1	1.89035688023723	0.00479261395515727	1.18529651164324	0.14504597386968	1.83435993189121	0.00915178576399254	2.26217610631004	0.00228162488044415
ENSRNOG00000011568	Rspo3	0.424402177739182	0.381860004071233	-0.0215802068152021	0.98283686327572	2.20809533246778	6.89877135376023e-08	1.76296751481429	3.30219846413866e-05
ENSRNOG00000011588	Rnf146	0.142076930511304	0.202742964246454	-0.190089256602667	0.122440075374083	0.137621949728046	0.250551490871661	0.161421605369944	0.218585232563092
ENSRNOG00000011622	Echdc1	0.262936412810907	0.0260840069892052	-0.108594011165403	0.52331864635096	-1.02405792206725	1.82094850736912e-22	-0.286572071761122	0.0262803855126555
ENSRNOG00000054753	AABR07000986.1	-0.272922876779128	0.801343110916234	-0.777373213665431	0.498286802377662	-1.07277755150606	0.219156922903223	-1.18196686196826	0.215334848693268
ENSRNOG00000042309	Kiaa0408L	0.499053350735011	1.52996921437405e-06	-0.136402443578727	0.348846641618621	0.2299353091396	0.0411225202923487	0.137624577062036	0.312341659068228
ENSRNOG00000012324	Soga3	0.495320803349502	0.000103995956422533	-0.205927532993695	0.213288426773231	0.314236818530625	0.0209782356831107	0.353757671796928	0.0134710863820858
ENSRNOG00000061741	AABR07000989.1	-0.471869227568823	0.643442962494883	0.55849902816251	NA	-0.773307438829455	0.400282111932019	-0.247712256900797	0.850924172152761
ENSRNOG00000054845	RF00560	NA	NA	NA	NA	NA	NA	NA	NA
ENSRNOG00000023407	Mrpl36	-0.5138240987701	0.595332216941436	0.928671145693625	0.38952112296108	-0.688861117388687	0.449402580593022	-0.70392221589862	0.500895966103249
ENSRNOG00000023387	LOC100912599	NA	NA	NA	NA	NA	NA	NA	NA
ENSRNOG00000012581	RGD1311933	NA	NA	NA	NA	NA	NA	NA	NA
ENSRNOG00000039788	AC094217.2	0	1	0	NA	0	1	-0.681120219282141	NA
ENSRNOG00000051400	RF00009	NA	NA	NA	NA	NA	NA	NA	NA
ENSRNOG00000039783	AC094217.1	0.682257943952847	0.0659899747119676	0.842421677554532	0.0362545995033115	1.03862509196765	0.00381959400275416	0.777085692158947	0.0504840462267585
ENSRNOG00000028357	Lrrc14b	-0.523975585841371	0.588732931951532	-0.229788061775754	0.873247694500337	-0.28356799458176	0.782386969434656	-0.807239600502413	0.428093208457005
ENSRNOG00000012775	Ccdc127	0.159762560499139	0.211842546726576	0.101675317029065	0.568768154863488	-0.177983229553682	0.173393175534969	0.163465117424183	0.291079350781817
ENSRNOG00000013331	Sdha	0.246877370623187	0.0014803543293016	0.18484167829912	0.0387307445341167	0.141717794658127	0.0901520137903979	0.13772718425509	0.134292957190264
ENSRNOG00000014485	Pdcd6	0.299903987913886	0.0158439911334392	0.17120269383854	0.297119864294915	-0.344529807207002	0.0054661890789629	0.165315028641295	0.303663850578883
ENSRNOG00000014721	Ahrr	0.736881110490025	NA	0.381835547199349	NA	0.585876554842212	NA	0.571036859848358	NA
ENSRNOG00000039776	Exoc3	0.0439809695854297	0.691748631027252	0.0595382488479562	0.672005551309179	-0.0406825150108957	0.726550237319953	0.0667101749191958	0.609348019142855
ENSRNOG00000015159	Slc9a3	2.29690804428978	0.000693389475347537	0.662502795676145	0.485333013834017	0.567452060795329	0.473751285767129	0.662537197883413	0.456772709856413
ENSRNOG00000015465	Cep72	-0.332006930364896	0.705141603294491	-0.427324628820685	0.698514580559669	-2.19580431969913	0.000621746042973272	-1.12256655476576	0.154284764106088
ENSRNOG00000028261	Tppp	1.93654539002693	3.84682432864484e-54	0.54550417012645	7.65465792321389e-05	1.06427548769086	7.15263044324439e-17	0.814459052037098	5.52343371777179e-10
ENSRNOG00000039743	Zdhhc11	0.0684785872755857	0.953544797253417	0.225183911770815	0.874234805977097	0.806215168251058	0.36949624589902	0.282702649391712	0.824208239765286
ENSRNOG00000060926	AABR07001001.1	NA	NA	NA	NA	NA	NA	NA	NA
ENSRNOG00000015676	Brd9	0.169633397600574	0.0889331670963098	0.121136589561216	0.345632246392556	0.210461933477085	0.0373751580217851	0.123143882442651	0.315907548291234
ENSRNOG00000015810	Trip13	-0.231430975745855	0.701134280242942	0.533859612788768	0.430464442263833	-0.149505894518371	0.815224900209742	0.561565323019431	0.384041507214128
ENSRNOG00000051415	RF00412	NA	NA	NA	NA	NA	NA	NA	NA
ENSRNOG00000045233	RF00001	NA	NA	NA	NA	NA	NA	NA	NA
ENSRNOG00000016103	Nkd2	0.776614453370421	0.00096439950937926	1.26300193817388	2.10529299639767e-07	1.32138373594363	3.1989972440359e-08	1.30603345447511	1.16459950780077e-07
ENSRNOG00000016372	Slc12a7	-0.895615811870679	0.00377854596992128	0.544613175285792	0.167579240763909	-0.124765902158083	0.761477600606402	0.181985965094571	0.703279200481491
ENSRNOG00000056712	AC142421.1	NA	NA	NA	NA	NA	NA	NA	NA
ENSRNOG00000026501	Slc6a19	-0.0423716782768616	NA	0	NA	-0.21637488699166	NA	0	NA
ENSRNOG00000016253	Slc6a18	NA	NA	NA	NA	NA	NA	NA	NA
ENSRNOG00000061518	AC142421.2	NA	NA	NA	NA	NA	NA	NA	NA
ENSRNOG00000025327	Tert	0.265463408640394	0.55158680311489	-0.313077264054895	0.560015689690748	0.600950253124517	0.160644640592001	-0.696665766486188	0.0896660723908422
ENSRNOG00000016923	Clptm1l	0.0979804883967357	0.276094015413265	-0.118135370876865	0.259235728966173	-0.302116262467274	0.000149013912860417	-0.107054588450418	0.303354734970284
ENSRNOG00000017302	Slc6a3	-6.2882319670395	3.85939063696909e-27	-0.85856302883651	0.39042476540081	0.081516707140145	0.946824671536778	-0.770404434243267	0.437035489393465
ENSRNOG00000017930	Lpcat1	-0.247919414510426	0.0169559908542811	-0.0110522800725452	0.962116589668023	0.19301479545836	0.105149971868523	0.141373492410111	0.315695170275431
ENSRNOG00000053180	AABR07001003.1	NA	NA	NA	NA	NA	NA	NA	NA
ENSRNOG00000047971	LOC100910528	NA	NA	NA	NA	NA	NA	NA	NA
ENSRNOG00000049394	LOC679739	-0.0514364677606054	0.961006393250452	0.171708108693335	0.894059409908906	0.861733177332453	0.287152698970661	-0.135168671150599	0.915198717474855
ENSRNOG00000012720	Irx4	-3.55503538548225	9.44812792519317e-07	-0.36592833332215	0.79195929476001	-3.23727141466262	1.08982561883274e-05	0	1
ENSRNOG00000060323	AABR07001006.1	NA	NA	NA	NA	NA	NA	NA	NA
ENSRNOG00000057164	AABR07001010.1	NA	NA	NA	NA	NA	NA	NA	NA
ENSRNOG00000012742	Irx2	-0.101630093408948	0.931199166399776	-1.26287616735738	0.203273361990697	-5.08738995613954	3.4769945410668e-13	0	1
ENSRNOG00000058487	AABR07001018.5	NA	NA	NA	NA	NA	NA	NA	NA
ENSRNOG00000055826	AABR07001018.3	NA	NA	NA	NA	NA	NA	NA	NA
ENSRNOG00000053323	AABR07001018.1	NA	NA	NA	NA	NA	NA	NA	NA
ENSRNOG00000056842	AABR07001018.4	NA	NA	NA	NA	NA	NA	NA	NA
ENSRNOG00000033609	Irx1	-1.77129979224493	0.0285668518788844	-0.684373840928793	0.564366438062653	-4.30013601546367	3.69015456846636e-09	-1.01200177282777	0.305266180038898
ENSRNOG00000054020	AABR07001018.2	NA	NA	NA	NA	NA	NA	NA	NA
ENSRNOG00000054169	AABR07001019.1	NA	NA	NA	NA	NA	NA	NA	NA
ENSRNOG00000057928	AABR07001025.1	NA	NA	NA	NA	NA	NA	NA	NA
ENSRNOG00000057721	AABR07001035.1	NA	NA	NA	NA	NA	NA	NA	NA
ENSRNOG00000016812	Adamts16	0.0625957922453816	0.942950527975648	-1.22184108929352	0.0626147452432446	-1.20240334155546	0.0427714049176018	-0.281379457085012	0.764513551634698
ENSRNOG00000047117	AABR07001037.1	-0.0672815132893042	NA	0.0585491769913551	NA	0.011501991244165	NA	-0.202459376649328	NA
ENSRNOG00000023053	Ice1	-0.260175526017837	3.23092302112732e-05	-0.151327284302034	0.0465540523849362	0.486198059571173	2.82448970349887e-13	-0.108805420088393	0.180009696605001
ENSRNOG00000049434	AABR07001048.1	NA	NA	NA	NA	NA	NA	NA	NA
ENSRNOG00000052375	RF00560	NA	NA	NA	NA	NA	NA	NA	NA
ENSRNOG00000017095	LOC679881	0.0500731312706822	0.958848409204435	-0.830309386745511	0.300097966812085	-0.67957321484139	0.340470372724085	-0.453107474803502	0.616880311481453
ENSRNOG00000055337	AABR07001054.1	NA	NA	NA	NA	NA	NA	NA	NA
ENSRNOG00000057357	AABR07001054.2	NA	NA	NA	NA	NA	NA	NA	NA
ENSRNOG00000017150	Med10	0.128251111923315	0.585604839167441	0.00730671517151508	0.988943886718871	0.0274422677589867	0.925897963276363	0.275434600648497	0.260308337566994
ENSRNOG00000043733	AABR07001057.1	NA	NA	NA	NA	NA	NA	NA	NA
ENSRNOG00000034075	Ube2ql1	0.504714632129097	0.00670907828610904	0.237010439360005	0.336881856971653	1.35555068702541	6.29656335033861e-15	2.13367354098456	7.62102429828918e-34
ENSRNOG00000017254	Nsun2	0.25322094956457	0.00165090018972701	-0.0474622342483748	0.731352934372787	-0.242527675759558	0.00414961405120824	-0.187213113574131	0.0495621891851673
ENSRNOG00000017601	Srd5a1	0.425748238899335	0.00102207151730179	0.121062105918836	0.538196065891692	-2.39548742822451	1.04101158381332e-98	0.0167773368104142	0.951616082072606
ENSRNOG00000052644	RF00399	-0.187273735452122	NA	0	NA	-0.21637488699166	NA	0	NA
ENSRNOG00000017613	Tent4a	-0.0982147579960747	0.423632837268437	-0.00257161642167645	0.994479568187413	0.524433991469147	9.10082072809985e-07	0.137449262025133	0.315695170275431
ENSRNOG00000055880	AABR07001061.1	-1.20061386236974	0.158694632512352	-0.0992205720575273	0.953025117737653	-1.57116899270755	0.0518585570943568	-0.257462111745296	0.843522958761841
ENSRNOG00000017678	AABR07001064.1	0.465992568417936	0.304860193096853	-0.582482358007145	0.245544604870287	1.01444510743986	0.0258003338962009	-0.400818139773807	0.449834923452769
ENSRNOG00000058077	AABR07001068.1	0.443707103371745	0.0323657348130487	0.197206640667656	0.503337952980787	2.28737112947299	4.5892141736791e-21	1.13710693638686	3.08243880025904e-07
ENSRNOG00000032150	Adcy2	0.497899481753459	7.14316947940065e-07	0.250716334393915	0.0355192073295962	2.00943649133647	3.64600965955028e-85	1.19858026035585	2.27647697983099e-32
ENSRNOG00000055957	RF00026	-0.489711485709001	0.588305701225465	-0.71367765948959	NA	0.227791494058403	0.802070880194333	0.204908821053765	NA
ENSRNOG00000047406	RGD1308544	0.762976687096019	0.0107053222991382	-0.0944562712746293	0.858992830999589	1.24815651942392	7.77965974449859e-05	0.72612714221512	0.0344663837886726
ENSRNOG00000027422	Fastkd3	-0.345730162860014	0.00422026284414903	-0.0944606299945393	0.632810082019034	0.300207506598267	0.0326614550921478	-0.13250614697952	0.446852977440411
ENSRNOG00000017826	Mtrr	0.055792617543408	0.792999673577599	0.0456525337146143	0.878291979196339	-0.262821024476251	0.127850035957777	0.0772093352202739	0.762551305988386
ENSRNOG00000042308	LOC680200	-0.49312470422667	0.222342291452485	-0.432045316470395	0.402910437544153	0.169789180887949	0.747980182951055	-0.411725564617354	0.416964759993497
ENSRNOG00000058041	RF00066	NA	NA	NA	NA	NA	NA	NA	NA
ENSRNOG00000051377	AABR07001099.2	0.729212725269791	2.74085982753926e-14	0.117500870188223	0.409925490576736	1.08876232145141	1.16618241635327e-24	0.21463975469809	0.0744527282757779
ENSRNOG00000059310	RF00026	0	NA	-0.254073056072998	NA	0	NA	0	NA
ENSRNOG00000017963	AABR07001099.1	0.205660367044708	0.247851154291889	-0.248742012806008	0.22178304896577	-0.377506416536302	0.0242978297303518	-0.0580986640542237	0.835639574841351
ENSRNOG00000049259	LOC102549842	-0.275453883867282	0.0566636043477319	-0.120043112280229	0.582986571914175	-0.277803515705986	0.072961752238209	-0.124131303517232	0.552949113944295
ENSRNOG00000016462	LOC102547287	-0.203026840996844	0.220876257297844	-0.190841676963773	0.363922792846029	-0.059656414653887	0.781591174969556	0.0857924653274172	0.739432736953708
ENSRNOG00000056694	AABR07001100.1	0.024317678975368	0.971781019162828	-0.52275529477012	0.366598189553062	-0.668363387615131	0.156394906824604	-0.421789711827681	0.483136310191224
ENSRNOG00000049256	rno-mir-29b-2	NA	NA	NA	NA	NA	NA	NA	NA
ENSRNOG00000046712	rno-mir-3556b-1	NA	NA	NA	NA	NA	NA	NA	NA
ENSRNOG00000054816	RF01518	NA	NA	NA	NA	NA	NA	NA	NA
ENSRNOG00000049881	AABR07001160.1	-0.06179121826622	NA	-0.159604252317293	NA	0.0236533857248504	NA	0.0112715421848779	NA
ENSRNOG00000047145	LOC102551340	-0.3069088575971	0.0161775585043681	-0.247085896614356	0.11291884826239	-0.426321380879316	0.00109380636091675	-0.0671469458896487	0.751667872609523
ENSRNOG00000046353	LOC501406	-0.263451919690056	0.201933035697158	-0.211491078457585	0.436076079612684	0.142704838810348	0.577804316014839	-0.140603696253817	0.633294304821826
ENSRNOG00000054466	AABR07001207.1	1.66252109334507	1.80318644280037e-06	-0.0192587242269995	0.980817954731875	0.772198417884026	0.0460300002211463	0.806264912362126	0.0563906555622896
ENSRNOG00000057057	AABR07001210.1	-1.05067423823908	0.141072434938861	-2.42696818791678	0.000243449719473053	-1.60286141081974	0.0178399982768778	-1.44816774409145	0.0523341108387721
ENSRNOG00000053328	AABR07001233.1	-0.0375772214494671	0.95710513984113	-0.170238837524999	0.835311916027006	-0.351156225419055	0.52811248600515	1.00400325847805	0.0876019320915251
ENSRNOG00000023081	AABR07001348.1	NA	NA	NA	NA	NA	NA	NA	NA
ENSRNOG00000016368	Ppp1r14c	0.0658460218600339	0.834767042887278	-0.515549491363986	0.0511328039126094	0.164629564110035	0.574311201850104	0.929306492014558	0.000296635221582788
ENSRNOG00000016286	Iyd	-0.0437465737277402	0.973113376684665	0.0896928332701423	0.958312294103804	0.303490603045037	0.767760405379512	0.221983764796483	0.867877683248347
ENSRNOG00000053056	AABR07001358.1	0	NA	-0.100181464385011	NA	0	NA	0	NA
ENSRNOG00000016011	Plekhg1	0.604375636221121	0.00146792833726156	-1.0621974210626	8.67244255816278e-09	-1.65832685234162	1.67506049173085e-21	0.298981991208229	0.197753339830462
ENSRNOG00000019582	Mthfd1l	0.620025365921776	7.69620727695469e-06	-0.0846767993249813	0.721360095959139	-0.693651773905695	3.07844378599036e-07	1.06729951130767	1.40186307101874e-11
ENSRNOG00000055235	RF00003	0.0334485333040584	NA	0.053710127302975	NA	0.01446250054032	NA	0.00689181188838305	NA
ENSRNOG00000019549	Akap12	-0.587630370434324	0.00384134520984595	0.379948847035879	0.122433656523032	-1.39341191502954	1.57235056533978e-13	1.51670005102054	1.61939786834658e-14
ENSRNOG00000019544	Zbtb2	-0.313796837173047	0.0945647012128127	-0.223925949362261	0.361982187166101	0.437267403758073	0.0311096313552141	-0.0154998219635123	0.970176868249076
ENSRNOG00000019501	Rmnd1	0.0964089211994456	0.370938977321709	0.0760323471539279	0.602017780924875	0.474018319607206	1.15521828203659e-06	-0.0740178708659222	0.590926268372824
ENSRNOG00000019489	Armt1	0.691094209582833	3.10126474572988e-06	0.15688552873227	0.479733885185938	0.395529187029161	0.0151759070903633	-0.0343529354427363	0.903126550483056
ENSRNOG00000054876	RF00045	-0.434336525467322	0.575001778017385	0.35419326897838	0.748398830902307	0.660334911137393	0.406261734402096	0.0190755647067526	0.992972079128175
ENSRNOG00000024280	Ccdc170	-2.2014689199945	0.000136252922188977	-1.24018304582128	0.0849434998100933	-2.65226697798334	3.26049131236068e-06	-1.84698146575711	0.00352662231401207
ENSRNOG00000019358	Esr1	-0.778217603229321	0.123627351257701	-1.00331388038135	0.0701087188812816	-2.55227492352777	2.96506669904771e-09	-0.518218473646069	0.435750434387238
ENSRNOG00000057689	AABR07001379.1	NA	NA	NA	NA	NA	NA	NA	NA
ENSRNOG00000055223	RF00604	NA	NA	NA	NA	NA	NA	NA	NA
ENSRNOG00000055166	AABR07001382.2	NA	NA	NA	NA	NA	NA	NA	NA
ENSRNOG00000018960	Syne1	0.429046423868193	0.0003649961810626	0.471470541909195	0.000175480728715389	1.40069212324276	1.90332153833084e-35	0.114867381686464	0.481790083723085
ENSRNOG00000052241	RF00026	NA	NA	NA	NA	NA	NA	NA	NA
ENSRNOG00000018858	Myct1	-0.00613796599229528	NA	0.08825543784897	NA	0.254168885257151	NA	0.240505858894262	NA
ENSRNOG00000053113	AABR07001389.1	0.303109294848321	0.763665871666194	0.562291272942089	NA	0.425711505954698	0.640721847298224	-0.0533336139734999	NA
ENSRNOG00000018808	Vip	1.9292501326499	9.13688905978825e-08	1.12054774808006	0.00604284192780932	2.34094083971924	3.10902891248751e-10	2.64226371448385	6.19106911488375e-12
ENSRNOG00000054156	AABR07001392.1	-0.117786191076795	NA	0	NA	-0.139429091147667	NA	0	NA
ENSRNOG00000024077	Fbxo5	0.0711989302145149	0.889638015622367	0.965943869541283	0.0395232294781207	-0.656602542201279	0.0937558371353152	-0.303082590411567	0.571596203271236
ENSRNOG00000018773	Mtrf1l	-0.0330624746538891	0.889130066785445	0.320421377312325	0.141734364014931	0.428884447640959	0.0268815468239225	0.223789287953331	0.343702254766637
ENSRNOG00000059321	RF00494	0.0334485333040585	NA	0.053710127302975	NA	0.01446250054032	NA	0.0068918118883831	NA
ENSRNOG00000055161	RF00493	NA	NA	NA	NA	NA	NA	NA	NA
ENSRNOG00000018690	Rgs17	0.803743896776738	4.01825410238582e-14	0.632352247466465	3.52230962921354e-08	0.55821018505099	1.01333524825903e-06	0.377989531621428	0.00206356476618533
ENSRNOG00000033265	AABR07001408.1	NA	NA	NA	NA	NA	NA	NA	NA
ENSRNOG00000059050	AABR07001416.1	0	NA	0	NA	-0.21637488699166	NA	0	NA
ENSRNOG00000059359	AABR07001416.2	0	NA	-0.177127260229005	NA	0	NA	0	NA
ENSRNOG00000060413	AABR07001416.3	0	NA	0	NA	0	NA	-0.146999779799603	NA
ENSRNOG00000018191	Oprm1	-1.75727198238935	0.00961359403606521	-1.07968536384933	0.199461583748016	-1.14660932343927	0.105912652799215	-1.12816121660955	0.147946439591107
ENSRNOG00000060991	AABR07001432.2	-0.466224272661329	NA	0	NA	0	NA	0	NA
ENSRNOG00000059866	AABR07001432.1	-0.0502534316960971	0.904048673960115	1.8981620433369	9.66116980488184e-11	3.44383583927043	4.36584906632303e-28	1.96055516253226	3.51847294454798e-11
ENSRNOG00000018163	Ipcef1	-0.331725084723104	0.305310146138841	2.01642425725543	4.37101027644281e-13	3.97400876516337	1.38552719355946e-39	1.8895430713093	1.47003786066715e-11
ENSRNOG00000055098	AABR07001433.1	NA	NA	NA	NA	NA	NA	NA	NA
ENSRNOG00000018052	Cnksr3	0.267570412174061	0.0431558156072841	0.306580470713971	0.0426625885316287	-1.27100694240668	1.02769015879123e-28	0.0780822260778569	0.700914550947823
ENSRNOG00000004144	AABR07001435.1	0.0253247353140698	0.969360781704641	-0.184918489869901	0.799801123645898	-0.0687649926592838	0.915510466357435	0.425142518626478	0.496414643754947
ENSRNOG00000060056	RF00026	NA	NA	NA	NA	NA	NA	NA	NA
ENSRNOG00000016919	Scaf8	-0.200099077129548	0.00427887818231965	0.128690939960089	0.145853087393098	0.455094381256979	1.72603838591655e-10	0.115167124048591	0.194211574392241
ENSRNOG00000057561	AABR07001444.1	-1.44370792396945	0.0113749411217043	-0.896621242429563	0.22773632755829	0.661794994799358	0.385023995015913	-1.35381349807297	0.0339934754660379
ENSRNOG00000016728	Tiam2	-1.83579356145891	2.94985352443664e-71	0.182981100946175	0.228373577286033	2.93281228335309	3.55794124391808e-82	-1.27806696813333	7.45122365099764e-33
ENSRNOG00000056223	Tfb1m	0.558212753479639	0.000144190820125826	0.140322148315922	0.529362342893023	0.209493402536169	0.226707418435207	0.157220048329897	0.449425384161579
ENSRNOG00000023531	Cldn20	-3.14047114235478	3.89416517316218e-05	0	1	-1.9959905055263	0.0124191282787312	0	1
ENSRNOG00000016490	Nox3	0.328032579537957	0.730130204532176	1.91743050241994	0.0245044577838676	0.768517052198545	0.372767268901049	0.566548314180572	0.588987956640472
ENSRNOG00000059546	AABR07001448.1	1.38865628269265	0.105232459728701	1.74310536386828	NA	1.86872756538098	0.0171865493344357	1.26775277386453	0.166986899219045
ENSRNOG00000054504	AABR07001452.1	-0.524578048221812	0.598173369324183	0.16606165110451	NA	0.164396859031526	0.878597377624639	-1.09015313767136	0.251673094897319
ENSRNOG00000053507	AABR07001455.1	NA	NA	NA	NA	NA	NA	NA	NA
ENSRNOG00000053052	LOC102548472	-0.159550116376076	NA	0	NA	-0.408292285079485	NA	0	NA
ENSRNOG00000017030	Arid1b	-0.0786166055249509	0.405160083483964	-0.163165614378529	0.0875590711874718	1.07144509851102	3.90925632101537e-41	-0.0104906574207016	0.948912371026161
ENSRNOG00000016973	Tmem242	0.211614581530547	0.219903496919788	0.0759780428946724	0.784345832826786	-0.575778191153213	0.000171039648021698	0.224443169423023	0.288434616379879
ENSRNOG00000029049	Zdhhc14	0.449891946340853	0.00290277698263134	-0.759790143620251	2.49809162161967e-07	-0.331149283718802	0.0344615270928309	-0.822249849333809	1.62540857150076e-08
ENSRNOG00000058103	AABR07001477.1	NA	NA	NA	NA	NA	NA	NA	NA
ENSRNOG00000046874	Snx9	-0.508929503541435	0.00402386829855431	-0.129944783974756	0.653129727366032	-0.695057583806342	8.31426306735971e-05	0.00854628917031063	0.986877196007502
ENSRNOG00000017114	Synj2	1.25622596624522	3.09824487082099e-14	-0.227486344008719	0.331743826922737	-0.432039788488696	0.0149941492077013	1.25789451427155	2.69014672895434e-13
ENSRNOG00000017889	Serac1	-0.24812235235656	0.0769046308233865	-0.451084239461687	0.00154677558987339	0.352142505919857	0.0213836082775884	0.207850405090628	0.254606325865115
ENSRNOG00000018007	Gtf2h5	-0.0924890768736469	0.669812433177133	-0.171195220220095	0.481441725600734	-0.420899640633695	0.0150687255031685	-0.349057296524119	0.0706571636095323
ENSRNOG00000018012	Tulp4	0.472756459355113	8.22609432243952e-21	0.163749719477305	0.00622334228245305	0.209631404130314	0.000149912772015972	0.185202660033497	0.00163600678945079
ENSRNOG00000045491	RF00001	-0.454526495342745	NA	0.184056997236897	NA	-0.252953198889696	0.799058237879123	-0.235720193793671	NA
ENSRNOG00000018158	Tmem181	0.508293492272941	1.22968922882225e-06	-0.309806361307932	0.00890934525961324	0.328684083096138	0.00395039629581675	-0.21303101705033	0.0925541786730913
ENSRNOG00000018207	Dynlt1	-1.05171435469286	3.53305529385021e-08	-0.324538930577864	0.23514685440306	-1.64446454621398	4.09938185411543e-18	-0.136297900241115	0.683161532247173
ENSRNOG00000018321	Sytl3	-0.349813009495952	0.726767715731353	-0.248769667367558	0.857558626261119	-0.301484421619181	0.761723457647909	0.0928101561015915	0.952667724024443
ENSRNOG00000018524	Ezr	0.407220685209721	0.00031746315342258	0.185670356516313	0.205252523412335	1.69364668636884	7.58271243674272e-48	0.540687757550255	4.35136394620511e-06
ENSRNOG00000058299	RF00026	NA	NA	NA	NA	NA	NA	NA	NA
ENSRNOG00000018762	Rsph3	-0.687665487220255	0.0120668119053651	-0.318216153153881	0.425519447497098	-0.624418357277392	0.0365922889777449	0.0189572813759522	0.979920278348655
ENSRNOG00000018915	Tagap	-0.0014761794654227	1	0.285234924482377	0.661075919119471	-0.723619390558299	0.0862439197948439	-0.338229348132281	0.548327840947845
ENSRNOG00000058258	AABR07001493.1	0.563485914163705	0.545284085801357	0.88008497433091	NA	0.839083790016804	0.303398287495292	1.05008144180372	NA
ENSRNOG00000018935	RGD1560015	0.588049809889246	0.0131919870381339	0.145593672756367	0.70592048110297	-0.797835286816956	0.000373008952743812	0.414824774741069	0.161314869770175
ENSRNOG00000030210	Fndc1	-0.175826630240722	0.614944518020302	0.628091340543304	0.0550426295160158	-0.77663583301235	0.00476216173267704	1.02626376203142	0.000717364751641644
ENSRNOG00000054760	RF01295	NA	NA	NA	NA	NA	NA	NA	NA
ENSRNOG00000058069	AABR07001497.1	0.176793011839155	NA	0.130655923146968	NA	-0.139429091147666	NA	0.0838376077323763	NA
ENSRNOG00000019048	Sod2	0.578699706522326	2.57667307617769e-17	0.0628406253132804	0.573695346340283	-0.667790013058102	5.18343583695292e-23	0.137171770879338	0.119938796023404
ENSRNOG00000019091	Wtap	-0.113846603575778	0.310602577107035	-0.216247793454731	0.059590086578789	-0.185610751150106	0.0805218223148359	-0.147402394213641	0.231178684072584
ENSRNOG00000019189	Acat2	0.625501885842816	9.9669721002686e-05	-0.256249558305391	0.210776003769063	-2.46359473883191	5.12551284426147e-75	0.290252228666875	0.180582603578368
ENSRNOG00000013975	Acat2l1	0.866894161313146	0.0252690089632683	-0.149239459592668	0.817469323717159	-2.3093325475184	2.44356925128229e-13	0.373592644490891	0.491431941185187
ENSRNOG00000014160	Tcp1	-0.0684332909761824	0.474932883805657	-0.000218694850569275	1	0.0181632017201926	0.875255286497839	0.0398704473052511	0.753956990326681
ENSRNOG00000058152	RF00401	-0.00121429440918831	NA	-0.0111042699457786	NA	0.0859412559486073	NA	0.0783705672966705	NA
ENSRNOG00000051969	RF00429	NA	NA	NA	NA	NA	NA	NA	NA
ENSRNOG00000014582	Mrpl18	0.366206658416644	0.0709811298308434	0.0532393289295178	0.883290234255646	-0.211896061453608	0.343985991495683	-0.00415714150563955	0.996418246880722
ENSRNOG00000023140	Pnldc1	-0.506449298917612	0.185239266827675	-0.0269308843147134	0.974633460676863	0.0725331408075974	0.896956477065259	-0.0984424930707286	0.882452234334226
ENSRNOG00000014965	Mas1l	-1.4668722257419	0.0494887192963487	-0.329040797857912	0.797515420145727	-1.6784388909316	0.0217075140106045	-0.15652230263153	0.907495579509198
ENSRNOG00000014971	Mas1	2.35069990679086	2.06928863631977e-05	-2.8593884139551	1.0692540966786e-07	3.48448275430166	6.29668159392359e-09	0.885215177858569	0.187308646314836
ENSRNOG00000014997	Igf2r	-0.0490857577989193	0.713655928437734	-0.3574439224503	0.000794728459832988	0.297237244276355	0.00455578367175283	-0.117226324306372	0.378942033586206
ENSRNOG00000051780	RF00561	-1.31650759790055	0.0760995423278598	0	NA	-0.719678329380799	0.349294666358673	0	NA
ENSRNOG00000056441	AC114389.2	NA	NA	NA	NA	NA	NA	NA	NA
ENSRNOG00000016337	Slc22a1	-0.0434972625399348	NA	0	NA	0	NA	0	NA
ENSRNOG00000016625	Slc22a2	-2.26793410542167	0.00463145663110618	0.360883912558047	0.795032000893864	-0.38279428602007	0.704697276980311	0.34165769939864	0.784685428923316
ENSRNOG00000053944	AC114389.1	-0.044850009304859	NA	-0.100181464385011	NA	-0.139429091147666	NA	0	NA
ENSRNOG00000022946	Slc22a3	3.78474810380744	2.43633762659904e-15	2.6239281214423	1.17844473993387e-08	0.908103778290939	0.0230119566499384	-2.74735021905104	6.33201231180722e-22
ENSRNOG00000017223	Plg	0.926617813732238	0.116796018423845	0.864767485924606	0.233361181994664	0.197467472665873	0.788217483628383	0.577540086072762	0.449462261776408
ENSRNOG00000017412	AABR07001512.1	-0.222403653084365	0.835780558900749	0.290582875838852	NA	0.0752448615895859	0.950089017896914	0.491717542319625	0.653704272862529
ENSRNOG00000017419	Map3k4	-0.0440035392473935	0.740550712886989	-0.287781780548455	0.0093069063996065	-0.0303034012611564	0.831421385737528	0.492666181187947	5.27887424283323e-06
ENSRNOG00000059864	RF00560	NA	NA	NA	NA	NA	NA	NA	NA
ENSRNOG00000055981	AABR07001516.1	-0.0434972625399347	NA	0	NA	0	NA	-0.146999779799603	NA
ENSRNOG00000017731	Agpat4	0.685428615994267	1.53258680780718e-06	-0.449404187456159	0.0044104118009218	-2.02826517196382	5.8913030690916e-53	0.463976720472865	0.00370576922873867
ENSRNOG00000054620	AC135026.1	0.557956076244198	0.228203574378812	-0.0730539655521637	0.930762415208357	0.439911766248781	0.38579860053038	0.286013422940301	0.652234529558941
ENSRNOG00000055141	AABR07001518.1	0.0341972470837102	NA	-0.0321892885683337	NA	0.0191541703353053	NA	-0.194686860248283	NA
ENSRNOG00000055547	AABR07001519.1	-0.0279542859668508	0.92694737047758	-0.213089808690005	0.493368467393872	-0.117080176503621	0.685223851542857	-0.332170950392824	0.220869148185225
ENSRNOG00000044833	RF00001	NA	NA	NA	NA	NA	NA	NA	NA
ENSRNOG00000048297	Qk	-0.0792594427138162	0.81973393227341	-0.282491918749476	0.430690144170713	-1.33588619850957	2.55125447907895e-08	-0.233445441818859	0.508054517988715
ENSRNOG00000060475	AABR07001555.1	1.57686827068476	0.00129110373873877	-0.450729668951231	0.49369207551666	0.36738014918788	0.535095430539673	1.35609755497467	0.0201361866501418
ENSRNOG00000017367	Pabpc6	-0.899766416632392	NA	-0.521428075221956	NA	0	1	-0.721629203683715	NA
ENSRNOG00000049044	AABR07001561.1	0	NA	0	NA	0	NA	-0.146999779799603	NA
ENSRNOG00000011243	MGC94891	-0.255022258551842	0.807227154647246	0.0896747188618812	0.957772052869209	-0.759929698774233	0.397304231657793	-2.57100344473889	0.000772600873130902
ENSRNOG00000011310	Pde10a	0.469484921694058	0.00166149968944147	-0.0206216867097652	0.947245056784246	2.27475093288134	7.02625345091909e-50	-3.64473215133538	3.29107027117051e-163
ENSRNOG00000012229	Tbxt	1.20174545512283	0.163257225567334	-1.58755402142685	0.0725931442348999	-0.126652234160617	0.912035203287069	-2.53722964765148	0.000971671295418305
ENSRNOG00000024172	T2	0.927906389494433	0.210063649151001	-1.29521675736743	0.0900464016002242	-1.1594296055867	0.0905772005966664	-1.77123580240325	0.00941937523985306
ENSRNOG00000024149	Prr18	1.85267220432021	3.19513416904594e-10	0.254134721502932	0.568406222682851	-0.70897035403433	0.0160985896397402	0.212441645370491	0.625167089007033
ENSRNOG00000024140	Sft2d1	-0.0132676500014191	0.949660438696551	0.089314432487408	0.699049430824333	-0.644956302093334	1.31094532876823e-06	-0.238009557114568	0.158709377239222
ENSRNOG00000012415	Mpc1	0.686329769425348	4.48705827328331e-18	0.473613548158067	2.73322805213527e-08	-0.115939588920626	0.221435506241381	0.365277124397345	3.50220218370017e-05
ENSRNOG00000012964	Ccr6	-0.181743973995901	0.871055045353581	-0.465958006595474	NA	0.367099773034969	0.709100953501361	0.360787574999555	0.761718740587655
ENSRNOG00000055093	Fgfr1op	-0.0100717010263001	0.951272142688354	0.348140654275521	0.0051942750842001	-0.817939103903707	1.00808974168651e-15	0.616881250904593	7.96764850703412e-07
ENSRNOG00000013190	Rnaset2	-0.399215258536734	0.00610401304791648	0.00497458549522429	0.990604354848394	-1.53419310611308	5.70657568230029e-31	-0.264379652028023	0.139112503562735
ENSRNOG00000057484	AABR07001573.1	-2.75268368343624	4.50304423197057e-05	-1.46098273429747	0.0914731014954444	-2.60830417165869	0.000171825975916523	-3.09058100108701	9.45985855788889e-06
ENSRNOG00000052521	RF00565	NA	NA	NA	NA	NA	NA	NA	NA
ENSRNOG00000013194	Rps6ka2	0.208714690018138	0.0956824081462441	-0.247396010831441	0.0708861910434529	-0.514164072691372	5.25601890488025e-06	-0.360322119711026	0.00348504265136617
ENSRNOG00000060227	RF00026	NA	NA	NA	NA	NA	NA	NA	NA
ENSRNOG00000039255	Gpr31	-0.160653545391154	0.816094788552675	-0.491248226373451	0.512123357786086	-0.846604687384784	0.126646676768713	-0.291627955618367	0.721012839808287
ENSRNOG00000013374	Tcp10b	NA	NA	NA	NA	NA	NA	NA	NA
ENSRNOG00000033901	Ttll2	1.08205422870585	0.217516797156915	-0.0699100205760638	0.968443222971674	0.194714982904236	0.856358241651239	-0.478578689520437	0.677582719282441
ENSRNOG00000047027	Unc93a	1.00047044306789	0.266682322120657	-0.745047812776497	0.515691724433979	-1.31510390547232	0.115183014556279	-1.76994347053093	0.0389194563840972
ENSRNOG00000053284	RF00003	NA	NA	NA	NA	NA	NA	NA	NA
ENSRNOG00000023753	Afdn	-0.537867669593891	8.66418981297245e-06	-0.237219938732857	0.11904495119996	0.512165902820916	4.24383076994348e-05	0.109350496718211	0.534056766087174
ENSRNOG00000051938	AABR07001591.1	-0.40128488440686	0.304860193096853	-0.427307979598451	0.371810937028866	0.0501749287313222	0.930425478486455	0.373300884996829	0.477051159182869
ENSRNOG00000058564	AABR07001592.2	0.130642473247311	0.870025491376039	-0.00087951958784806	1	0.203486358618561	0.797725273702659	0.825997974111777	0.289077819775777
ENSRNOG00000056439	RF00026	NA	NA	NA	NA	NA	NA	NA	NA
ENSRNOG00000054756	AABR07001592.1	0	NA	0	NA	0	NA	-0.146999779799603	NA
ENSRNOG00000052956	RF00026	0	NA	-0.100181464385011	NA	0	NA	0	NA
ENSRNOG00000059551	RGD1560718	0	NA	0	NA	-0.139429091147666	NA	0	NA
ENSRNOG00000051553	LOC103690980	NA	NA	NA	NA	NA	NA	NA	NA
ENSRNOG00000059913	AABR07001599.1	NA	NA	NA	NA	NA	NA	NA	NA
ENSRNOG00000055136	AABR07001610.1	-0.0434972625399348	NA	0	NA	0	NA	0	NA
ENSRNOG00000053004	LOC102551080	NA	NA	NA	NA	NA	NA	NA	NA
ENSRNOG00000061719	AABR07001623.1	0.603362214655929	0.491598600323716	0.826300036159205	NA	0.771958168892788	0.328512944066462	-0.310727647967541	NA
ENSRNOG00000060438	AABR07001634.1	-0.256432713984261	0.73800849916258	-0.722233252192516	0.360359814762114	-3.20693918183759	2.6156851419477e-10	-0.244814312111602	0.809473255593009
ENSRNOG00000055577	AABR07001640.1	NA	NA	NA	NA	NA	NA	NA	NA
ENSRNOG00000046250	LOC100911027	-0.0538430024202856	NA	-0.725506822032946	NA	0.0748801497645447	0.94195473524844	-0.369257267378067	NA
ENSRNOG00000052093	Smok2a	0	NA	-0.100181464385011	NA	-0.139429091147666	NA	0	NA
ENSRNOG00000054056	AABR07001662.1	0	NA	0	NA	-0.139429091147666	NA	-0.146999779799603	NA
ENSRNOG00000030145	RGD1561667	0.187340124992045	NA	0.130655923146968	NA	0.0914082963843131	NA	0.0838376077323762	NA
ENSRNOG00000055830	AABR07001700.1	0.170082458541874	NA	-0.129982058417651	NA	-0.463232624720895	0.520972212228743	0.161655156184007	NA
ENSRNOG00000052700	AABR07001699.1	NA	NA	NA	NA	NA	NA	NA	NA
ENSRNOG00000059261	AABR07001700.2	NA	NA	NA	NA	NA	NA	NA	NA
ENSRNOG00000057320	RF00019	NA	NA	NA	NA	NA	NA	NA	NA
ENSRNOG00000054834	AABR07001734.1	2.64907471959959	0.000687941619930132	-0.173522061943069	0.906846696687537	1.80333903937859	0.024878005383504	1.74506586186075	0.0441852951327092
ENSRNOG00000013671	Vom2r9	NA	NA	NA	NA	NA	NA	NA	NA
ENSRNOG00000022921	Dact2	3.59757169800026	1.54371415395347e-46	2.2391683709302	2.40188756889239e-18	3.61309066937967	2.00688402434968e-43	1.59597086384748	7.37794508434037e-10
ENSRNOG00000014166	Smoc2	-0.917639838850186	0.235742025705134	-1.21082934427046	0.154115142191011	-4.05776984697706	1.6454484896247e-10	-2.49873226213347	0.000296020950990008
ENSRNOG00000061057	AABR07001762.1	NA	NA	NA	NA	NA	NA	NA	NA
ENSRNOG00000010529	Thbs2	-1.13539030508182	0.00611695292702096	1.14345183375845	0.0166043274958837	-2.35951757527281	8.9140280906128e-10	1.26498251069618	0.00676977510552858
ENSRNOG00000058989	AABR07001764.1	0.786028064265053	NA	0.148816889993959	NA	0.233656027654359	NA	-0.0455862508404963	NA
ENSRNOG00000061383	RF00066	-0.0434972625399347	NA	0	NA	0	NA	-0.146999779799603	NA
ENSRNOG00000015609	Wdr27	-0.00442767896772438	0.991294492324489	-0.304864005918948	0.236425211344563	0.552246809924578	0.0121360559035901	-0.152109231217253	0.605708663586312
ENSRNOG00000059948	RF00105	-0.00174325437699399	1	0.720915800560595	0.527753164539649	1.58720496741627	0.0504657731340749	0.159446433901599	0.909969198119527
ENSRNOG00000055517	RF00105	0.110394329148052	NA	-0.100181464385011	NA	0.0144625005403199	NA	0.00689181188838302	NA
ENSRNOG00000053938	RF00105	-0.849821955700716	0.341386825059462	0.160617760438579	NA	0.457254313617109	0.614208581368277	0.179964751161423	NA
ENSRNOG00000058803	RF00105	-1.28964110911845	0.0835721400220713	-0.957977323657737	0.309283281849844	0.455027136962647	0.628023149442126	0.421707789225445	0.709036783193412
ENSRNOG00000060933	RF00105	-0.213753189819644	0.799601114065581	-0.0151928166737947	0.994509098263304	0.483669747956267	0.554811989037941	0.551881386649158	0.55711148164574
ENSRNOG00000051787	RF00105	-0.493441788561591	0.405965612130956	0.037140462847171	0.975007940121343	1.31913630033128	0.021449181060687	0.25547937985257	0.75480710092757
ENSRNOG00000015597	LOC100125364	0.0402075558028546	0.829510823835849	-0.20496849022091	0.253023535305502	-0.455830035585426	0.000955203401944436	0.104745620000862	0.61720785048756
ENSRNOG00000061312	Phf10	-0.512978309979001	5.06934472406413e-07	-0.0266537201965719	0.899404237471178	-0.252989000014506	0.0279968069992201	-0.134500177711282	0.352261204775042
ENSRNOG00000015293	Tcte3	-0.0182561327547801	0.991108516794699	0.573716385368461	NA	-0.0313531610630607	0.982424837615361	0.874828852361565	0.369238728333876
ENSRNOG00000015230	Ermard	-0.213261308687564	0.210251154179825	-0.0664713437865091	0.808117174572402	0.0037033483474784	0.991976809392025	-0.0848021401173031	0.723644508422048
ENSRNOG00000059984	Dll1	-0.469247950902445	0.183059467559066	-0.56230206353567	0.155079159482902	0.774484713333691	0.0286200592992618	0.119933948650467	0.827286121324818
ENSRNOG00000058790	Fam120b	0.0290125942999608	0.772568300608396	-0.33151421059234	1.46286349623875e-05	-0.13649763575167	0.0976571972549168	-0.210861488136911	0.0108370967779662
ENSRNOG00000001488	Psmb1	0.335559980260073	3.65843241179203e-06	0.0545832880852618	0.654002432173624	-0.28023078118282	0.000220054942349526	0.0140507835230204	0.925494276654155
ENSRNOG00000001489	Tbp	-0.348543930725914	0.0090801860771545	0.0199633232769808	0.944935271651099	0.242927470187224	0.130626619476965	0.151937006319949	0.441189819193115
ENSRNOG00000001490	Pdcd2	-0.0500353056906258	0.852970366540996	0.025607462287418	0.953040102612244	-0.352069021874614	0.106399076669936	-0.0777487795953883	0.823050505688611
ENSRNOG00000021493	Prdm9	-0.422409128286919	0.221055452819429	0.410910313209186	0.360053943233046	-0.374515821237827	0.306420666065085	0.140711247174684	0.795163036131628
ENSRNOG00000056729	AABR07001780.1	-0.129683162495384	NA	-0.177127260229005	NA	0	NA	0	NA
ENSRNOG00000014434	Chd1	-0.530494700559248	3.43466223386424e-08	0.151658391510887	0.270045631953644	0.179287883381667	0.120661978179969	0.129332167654576	0.346229933800926
ENSRNOG00000048190	Rgmb	-0.741978599988203	3.23304221489076e-07	-0.584390493363981	0.000303456126704669	-0.486607060459029	0.00228258672595601	0.0180925865420278	0.959002959769671
ENSRNOG00000052286	AABR07001799.1	-0.387810465590024	NA	0	NA	0	NA	0	NA
ENSRNOG00000061593	RF00272	NA	NA	NA	NA	NA	NA	NA	NA
ENSRNOG00000056478	AABR07001807.1	-0.116616344919279	0.91963013715973	-0.485511344455494	NA	0.377190383412253	0.700690506426574	0.661033113898882	NA
ENSRNOG00000057242	RF00026	NA	NA	NA	NA	NA	NA	NA	NA
ENSRNOG00000012692	Riok2	-0.506700843318701	0.00015108896924639	-0.179633479189102	0.360919958772305	-0.397123028412894	0.00759148408576522	-0.142446563915391	0.489910213847269
ENSRNOG00000012988	Lix1	-0.073261871141994	0.620402860230996	-0.408687625834724	0.000734530618578642	1.51949240315627	1.8860950704287e-41	-0.0660463533195301	0.705777564931081
ENSRNOG00000047387	Lnpep	-0.216556993062672	0.799184557159373	-0.0607763212315469	0.965785722514258	0.00226275494985044	1	1.24875460695481	0.118566599536016
ENSRNOG00000035654	Mir99b	-1.44759046967978	0.0440155502214496	-0.0115311643674172	0.99759295276078	0.411983214580593	0.661140898243692	1.05802777936786	0.256819150739856
ENSRNOG00000035453	Mir3596c	NA	NA	NA	NA	NA	NA	NA	NA
ENSRNOG00000035572	Mir125a	-1.08532678623458	0.223014853020952	0.388518759069031	NA	0.515020135875652	0.583801786755047	-0.36578424486322	0.761718740587655
ENSRNOG00000039076	Spaca6	-0.158149994813332	0.213053756405119	0.128394900197306	0.446320673496536	1.1459195287233	1.15208282213898e-18	0.313877775637002	0.0229122040527265
ENSRNOG00000010994	Has1	-1.08814866096748	0.195128543668415	-0.356113518169117	NA	-0.673180131209998	0.434068000312993	0.0491755197988983	0.97637013211042
ENSRNOG00000011174	Fpr1	0	NA	0	NA	-0.139429091147666	NA	0	NA
ENSRNOG00000060169	RF00026	-0.0434972625399348	NA	0	NA	0	NA	0	NA
ENSRNOG00000042605	Fpr2	0.332551581745266	0.753376193080475	0.0823716565473344	0.962123317580741	-1.20820504065002	0.159172027670394	-0.424916665076116	0.721276878581818
ENSRNOG00000045732	Fpr-rs3	NA	NA	NA	NA	NA	NA	NA	NA
ENSRNOG00000052154	Vom1r6	NA	NA	NA	NA	NA	NA	NA	NA
ENSRNOG00000061043	Vom1r7	NA	NA	NA	NA	NA	NA	NA	NA
ENSRNOG00000011234	LOC690283	0.463907543869173	0.563889247891016	0.301681923885699	0.792990736672648	0.506435830795387	0.537294913790509	-0.0113186082916632	0.997558027846281
ENSRNOG00000051757	Vom1r8	NA	NA	NA	NA	NA	NA	NA	NA
ENSRNOG00000054409	Vom1r9	NA	NA	NA	NA	NA	NA	NA	NA
ENSRNOG00000052260	Vom1r10	NA	NA	NA	NA	NA	NA	NA	NA
ENSRNOG00000060271	LOC108348087	NA	NA	NA	NA	NA	NA	NA	NA
ENSRNOG00000055538	Vom1r12	NA	NA	NA	NA	NA	NA	NA	NA
ENSRNOG00000056833	LOC108348087	NA	NA	NA	NA	NA	NA	NA	NA
ENSRNOG00000047498	LOC681990	NA	NA	NA	NA	NA	NA	NA	NA
ENSRNOG00000011282	Ppp2r1a	0.0273026094373241	0.757628054224716	-0.0874709682549858	0.327171910849015	0.313711161018044	1.39716153332851e-06	-0.0310628570022005	0.767028018590941
ENSRNOG00000050623	Vom1r-ps112	-1.18621588620644	0.17691954986485	0.222426755109421	0.879550828297196	0.597870520692787	0.524438375433425	-0.893314833499833	0.380041586855849
ENSRNOG00000060596	AABR07001880.1	-0.0484890780705551	0.970287920655529	0.928965644325219	NA	0.852994678262642	0.32988206924708	0.847965419785644	0.392295523300403
ENSRNOG00000059492	LOC100365363	-0.656607439712181	1.35476489020693e-07	-0.59437166721462	1.36704011921545e-05	-0.283380406970633	0.058272590834704	-0.629326171041272	5.7309934223083e-06
ENSRNOG00000032996	Vom1r19	-0.353229240539984	0.730576360685869	-0.602252263954461	NA	0.0118364619240813	0.995853663671426	-0.0211538266537559	NA
ENSRNOG00000028807	Vom1r20	0.110394329148052	NA	0.0537101273029751	NA	-0.0624832953036733	NA	0.00689181188838301	NA
ENSRNOG00000060716	AABR07001888.1	NA	NA	NA	NA	NA	NA	NA	NA
ENSRNOG00000052406	LOC102552527	-0.18852211617203	0.386368369069149	-0.263205248154188	0.296207873260548	-0.776910790581205	2.38457904201259e-05	-0.172602095835954	0.532068975236461
ENSRNOG00000051578	Zfp51	0.15571078985852	0.807038900491213	-0.453072564534452	0.504717670926073	-0.60593672093627	0.24969038055545	0.130092238735467	0.878929542730732
ENSRNOG00000042347	AABR07001896.1	-0.672405687933868	0.0311045919092076	-0.470481414796943	0.236551150991131	-0.568394127728141	0.0870466539979257	-0.588033449972235	0.103448273808157
ENSRNOG00000042826	Zfp52	-0.741063681699236	0.050352044007922	-0.70256557033397	0.107170678834269	-0.667874336181415	0.0851087557432161	0.0525177325941108	0.943391678714762
ENSRNOG00000060256	RF00009	-0.118183547064762	NA	-0.0201257335565614	NA	0.197972443454489	NA	-0.187054362113725	NA
ENSRNOG00000058436	LOC108348215	-1.01315940652384	0.0399302495720251	-0.33782813869302	0.670677421016769	-1.05983790004428	0.0358428512237658	0.0177399195130746	0.991050250651021
ENSRNOG00000043341	Znf761	-0.38784393830699	0.105248008368204	-0.051989398835668	0.906492735026738	0.113876735559713	0.710946406849602	0.145407525035724	0.685910710393477
ENSRNOG00000042547	AABR07001902.1	-0.038662791624347	NA	-0.186479166679445	NA	-0.44673623894401	0.630289349730959	0.0065858727092639	NA
ENSRNOG00000025949	Vom1r22	NA	NA	NA	NA	NA	NA	NA	NA
ENSRNOG00000047128	Vom1r23	NA	NA	NA	NA	NA	NA	NA	NA
ENSRNOG00000058030	AABR07001905.2	-0.396855963164229	0.00777210099028	-0.104644348027724	0.672039983992802	-0.249676283058305	0.143140403077095	0.116142740853257	0.622591893758667
ENSRNOG00000057250	AABR07001905.1	0.805397654161394	0.0418287817349409	-0.211345216258995	0.73243685045912	1.35847253317382	0.00207612705245605	-1.16863315428515	0.00181697680785311
ENSRNOG00000051570	AABR07001910.1	0.486865169946019	0.0522974497342326	0.0477827550169006	0.92108301315072	-0.0679243524275365	0.840341452666514	0.259847249983016	0.437035489393465
ENSRNOG00000054919	RF00026	0	NA	-0.100181464385011	NA	-0.139429091147666	NA	-0.146999779799603	NA
ENSRNOG00000055824	RF00026	1.43008085452242	0.0927188267802464	0.0930738518205063	NA	1.36258805573091	0.0960819627833001	0.740060857512801	0.478650314693486
ENSRNOG00000047884	AABR07001923.1	-1.16505331572815	0.0016272851350558	-0.853327531553421	0.0490769005167873	-0.999906492854355	0.00887076919654295	-0.300368690977153	0.583695962455341
ENSRNOG00000026569	LOC102555377	-0.140747889338097	0.522861057951152	-0.47945926723762	0.0166160500404661	-0.0337461737022353	0.902793001008938	-0.546747004738271	0.00476940501116435
ENSRNOG00000028767	AABR07001926.1	-2.13831740325502	0.00748023034484594	-0.534517011246675	NA	-1.77607404702767	0.0268983115511692	0	1
ENSRNOG00000051875	AABR07001926.2	-0.504823335424637	NA	-0.0334494878796563	NA	-0.698026718441589	0.414232145218454	-0.477172764190844	NA
ENSRNOG00000061533	AABR07001926.3	-0.33150847945005	0.134570725529406	-0.132486739495562	0.69991647030027	-0.101706066098328	0.714996167983044	-0.106123633654992	0.752697364769347
ENSRNOG00000059824	AABR07001929.1	-0.18462439354664	0.777090678961814	-0.108963629949948	0.910999537372829	0.00368969519482415	1	0.491928289396774	0.503222418853242
ENSRNOG00000055124	AABR07001942.1	0.584502662357665	0.232089128282478	-0.134362137992199	0.866635747125312	0.109413043381935	0.863358787171602	0.0687841296168948	0.937102534247635
ENSRNOG00000011675	Zfp40	-1.0973397199197	1.99014436360178e-16	-0.585210390605349	0.000111754976727359	0.0474434686611617	0.822078020268877	-0.507852569697857	0.0011271124111419
ENSRNOG00000029458	Vom2r15	0.110394329148052	NA	0.053710127302975	NA	0.0144625005403199	NA	0.00689181188838308	NA
ENSRNOG00000058286	LOC682419	-0.306739842659262	NA	0	NA	0	NA	-0.182991912973717	NA
ENSRNOG00000054736	Vom2r16	-2.52241249645646	0.00120117576127327	-0.555343000551566	0.658668663917402	-1.183791410448	0.168984406271083	-0.343022558652331	0.782948357310486
ENSRNOG00000047616	AABR07001967.1	NA	NA	NA	NA	NA	NA	NA	NA
ENSRNOG00000060529	Vom1r110	NA	NA	NA	NA	NA	NA	NA	NA
ENSRNOG00000053825	LOC108348164	NA	NA	NA	NA	NA	NA	NA	NA
ENSRNOG00000054778	Vom1r29	NA	NA	NA	NA	NA	NA	NA	NA
ENSRNOG00000056653	Vom1r109	NA	NA	NA	NA	NA	NA	NA	NA
ENSRNOG00000055843	Zik1	-0.142241231560984	NA	-0.141149037116228	NA	0.0190253280389095	NA	0.00908548588162021	NA
ENSRNOG00000058214	AC098462.1	NA	NA	NA	NA	NA	NA	NA	NA
ENSRNOG00000057219	Vom1r30	NA	NA	NA	NA	NA	NA	NA	NA
ENSRNOG00000055529	AABR07071874.1	NA	NA	NA	NA	NA	NA	NA	NA
ENSRNOG00000009146	Vom2r26	NA	NA	NA	NA	NA	NA	NA	NA
ENSRNOG00000058087	Lilrc2	-0.115090794916259	NA	-0.349005344181499	NA	-0.434931653288943	NA	-0.450247702256742	NA
ENSRNOG00000054954	Pirb	-0.0325590812370237	0.977256174400365	0.28747033632087	NA	-0.815042764830048	0.289785326102393	0.00307938029506382	NA
ENSRNOG00000053260	Lilrb3a	-0.319395985200752	0.68912268270527	0.801502358682464	0.368119573360945	-0.37733061205879	0.631961712885208	0.40028100990642	0.681492236497339
ENSRNOG00000058538	LOC690948	0.307570261549621	NA	1.19562445331363	NA	0.827356096013512	0.322501863092141	1.07322446361211	NA
ENSRNOG00000058909	Rps9	-0.690364848389073	0.00134641504071863	-0.581168935172514	0.0208989919113494	-0.980270849328074	7.03039962281281e-06	-0.742298550894653	0.00203567071747917
ENSRNOG00000055179	Tsen34	NA	NA	NA	NA	NA	NA	NA	NA
ENSRNOG00000052600	Mboat7l1	0.208102501238017	0.636871182674629	-0.307775341152719	0.547986410420084	-0.190649654100198	0.670409868325267	-0.300471227869167	0.537767700751399
ENSRNOG00000059741	Tmc4	-2.16570586338245	0.00187114912696674	-1.51516565544773	0.0705658239567306	-0.298809986931514	0.761796330299251	-2.06196382341173	0.00611978931450329
ENSRNOG00000058422	Lilrb3b	-0.475925602131862	0.624287424156644	-0.785915419428187	NA	-0.890408146775821	0.289594576715295	-0.349760019780666	0.758748706344619
ENSRNOG00000059572	Tsen34l1	-0.134481408874355	0.771963217203521	0.296752785053051	0.601044005824843	-0.404959195786437	0.32805151237432	-0.0749109373486144	0.913494459104283
ENSRNOG00000054459	Mboat7	NA	NA	NA	NA	NA	NA	NA	NA
ENSRNOG00000061893	Leng1	-0.122793540049709	0.639329492514036	0.27187706208272	0.360282299483825	-0.45462057141438	0.0399833255302439	0.0973657029114588	0.788294063033347
ENSRNOG00000053234	Cnot3	-0.356813844987429	7.13171554846761e-05	-0.0315307839274693	0.856938605097202	0.658800023781138	2.19543847706671e-11	-0.00590897215292326	0.98015539471311
ENSRNOG00000060004	Mir3572	NA	NA	NA	NA	NA	NA	NA	NA
ENSRNOG00000061039	Prpf31	-0.129055969772654	0.332191556364891	-0.0427697154821901	0.843909641342728	0.00748235063059973	0.971138188324394	0.195767599781426	0.205874550538487
ENSRNOG00000056098	Tfpt	0.00960993055203059	0.978879116537164	-0.043347711621585	0.922897522748376	0.0283880813031771	0.936640852354463	-0.000194054153809969	1
ENSRNOG00000060293	Ndufa3	0.215050780255078	0.106365575299844	0.0814114834756597	0.693929580363781	-0.113590087800003	0.458972824558213	-0.29046937760794	0.040673431290428
ENSRNOG00000055716	Oscar	0.702642747085686	0.228116788655076	0.584020275304186	0.437972643356142	1.28556331029603	0.034175481962546	0.106632417474903	0.9143334729491
ENSRNOG00000055796	AC103574.1	0.110394329148052	NA	0.053710127302975	NA	0.0144625005403199	NA	-0.0700539839556101	NA
ENSRNOG00000055581	Tarm1	0	NA	0	NA	-0.21637488699166	NA	0	NA
ENSRNOG00000057852	Cacng6	-2.3146124252967	1.19433495968246e-08	-0.644690042234799	0.281433856023025	1.29658504137673	0.0235590926446023	0.806327224727458	0.210808674336993
ENSRNOG00000057848	Cacng8	-0.522335289868763	0.00358625177597438	-1.62128003342868	3.84987265859499e-22	2.358639102445	3.42159297935157e-33	-0.264786844519565	0.231731321160547
ENSRNOG00000054831	Mir935	NA	NA	NA	NA	NA	NA	NA	NA
ENSRNOG00000056257	Cacng7	-0.411085955765325	0.000637838933875435	0.626282710947828	2.76782413829096e-07	0.36683241267587	0.00267450193990315	1.25035864343351	1.06946971104158e-26
ENSRNOG00000054371	Prkcg	-0.0495921110927198	0.703008933522836	-1.95158939214915	4.72598273321139e-104	2.73346080916403	7.3981126923086e-148	-0.473839751484564	1.22495351068856e-06
ENSRNOG00000053450	Myadm	1.20715724578735	1.87100072632244e-16	0.00401048909468989	0.993963148311977	0.607534324439122	8.28550989123433e-05	0.866693506640198	2.80050503603864e-08
ENSRNOG00000053124	Olr1l	NA	NA	NA	NA	NA	NA	NA	NA
ENSRNOG00000055798	LOC103689958	NA	NA	NA	NA	NA	NA	NA	NA
ENSRNOG00000056884	Olr386	NA	NA	NA	NA	NA	NA	NA	NA
ENSRNOG00000060745	Nlrp12	-0.0434972625399347	NA	0	NA	-0.139429091147666	NA	0	NA
ENSRNOG00000060612	Mir295-1	NA	NA	NA	NA	NA	NA	NA	NA
ENSRNOG00000057399	Mir294	NA	NA	NA	NA	NA	NA	NA	NA
ENSRNOG00000057453	Mir293	NA	NA	NA	NA	NA	NA	NA	NA
ENSRNOG00000056886	Mir291b	NA	NA	NA	NA	NA	NA	NA	NA
ENSRNOG00000060727	Mir292	NA	NA	NA	NA	NA	NA	NA	NA
ENSRNOG00000051974	Mir291a	NA	NA	NA	NA	NA	NA	NA	NA
ENSRNOG00000056469	Mir290	NA	NA	NA	NA	NA	NA	NA	NA
ENSRNOG00000054438	LOC292543	NA	NA	NA	NA	NA	NA	NA	NA
ENSRNOG00000048635	Vom2r27	NA	NA	NA	NA	NA	NA	NA	NA
ENSRNOG00000056036	LOC103691005	-0.605036458646699	6.08742368987705e-05	-0.179262996728978	0.426415463598664	0.761905349409621	1.11800559901835e-05	0.261867258879645	0.206892116498954
ENSRNOG00000056327	AABR07002010.1	-0.094037288143411	0.925593723334974	0.840047388844662	0.392920446376134	0.276249795403491	0.765263712760758	0.346069042885231	0.75334283668386
ENSRNOG00000057050	Vom2r13	1.93648585556413	0.0173275216552977	0.789469438780017	0.486948342503138	1.17214683238172	0.171743905309739	1.97204843969368	0.0187099000532433
ENSRNOG00000055298	Vom2r80	-0.164433519206042	NA	0	NA	-0.2846364246543	NA	-0.19337499064178	NA
ENSRNOG00000054417	AABR07002025.1	NA	NA	NA	NA	NA	NA	NA	NA
ENSRNOG00000048100	AABR07002044.1	-0.666862652687306	0.463586149849011	0.421668175646343	NA	-0.646094475738293	0.459736926408529	0.0722865246937414	0.961925330412325
ENSRNOG00000046198	Vom2r19	-0.461640404211269	NA	-0.13973061005627	NA	0	NA	0	NA
ENSRNOG00000027550	Mzf1	-0.0493035368953951	0.755778670049541	-0.502619061237222	3.72802575619485e-05	1.33862657106815	1.45697842228675e-24	-0.224442140375394	0.11622475394047
ENSRNOG00000027514	Ube2m	0.692710625413762	1.17749180123937e-27	0.263695362574544	0.000246936767288105	0.42076441297538	6.22875469955376e-10	0.131300405756883	0.107183198502754
ENSRNOG00000043328	Chmp2a	-0.132029067539146	0.189941236520299	-0.128044910442029	0.302573276495146	-0.207803354674604	0.0368194076381131	-0.233425082693569	0.0271257045194469
ENSRNOG00000027487	Trim28	-0.512907075514657	1.34802266108929e-16	-0.193296143620942	0.00981612482893486	0.193064814049449	0.0070917072291184	-0.108691033027188	0.196879446424599
ENSRNOG00000027459	Zbtb45	0.284183088683104	0.0975206012881416	0.36537042898306	0.0575207394842128	0.75971808763737	1.04232656882011e-05	0.139019743169871	0.555572972443408
ENSRNOG00000019626	Slc27a5	-1.58340200129415	0.0180508549399165	-0.402321987767437	0.721717579017369	-0.400195486747964	0.645651915692061	-0.295805440258895	0.791064961020651
ENSRNOG00000060429	AABR07002065.2	-0.384877524053238	0.129122113420095	-0.154063306347841	0.698405010762339	-0.120246238656502	0.710237839492436	-0.685313727797884	0.00786501779264319
ENSRNOG00000019623	AABR07002065.1	-0.234579843183038	0.49390900552878	0.080939139651744	0.88369628506898	0.335070816910072	0.356299084700211	-0.183806991362833	0.682380416338472
ENSRNOG00000027436	Zfp324	-0.250679682506854	0.272733258290723	-0.189211296748208	0.542757735187163	0.583801035917807	0.0157991722609424	0.0397902298655007	0.924966260832935
ENSRNOG00000051968	AABR07002066.2	0	NA	0	NA	0	NA	-0.223945575643596	NA
ENSRNOG00000038445	Rnf225	-0.263896946240994	0.803871448033048	-0.3535181251167	0.796498471855813	-0.208259108000135	0.847703690985093	0.270535593044048	0.834319352905316
ENSRNOG00000019453	Rps5	-0.166084363332848	0.0954067868996501	-0.0542958907766708	0.735224895699383	-0.357070455540297	0.000152100397703427	-0.35466828571492	0.000330528461638042
ENSRNOG00000031113	Zscan22	0.17806436030545	0.485807292942188	0.306904153345016	0.287479151597192	0.46507521684952	0.0524941628149539	-0.0656291763295887	0.860720099231556
ENSRNOG00000031459	Zfp128	-0.265580874341631	0.0631334114592419	-0.0078831864236399	0.981973386442334	0.034424836507194	0.869468778248056	0.307880296196506	0.077791994508471
ENSRNOG00000031328	Zfp110	-0.524860771608514	2.22174090429654e-07	-0.0136453360273214	0.953326038937233	-0.225412953888317	0.0502863982053051	0.472394533084304	5.04247200620743e-05
ENSRNOG00000045583	AABR07002068.1	-0.214107411897311	0.846251534034709	-0.221282565361011	NA	0.0624188573152826	0.959476067564035	0.0456062393532388	0.980224378817286
ENSRNOG00000019376	Zfp329	-0.650952963651217	3.30910487940496e-05	-0.343527025605999	0.0740394318026173	-0.157400847229517	0.42002433611153	-0.189974401458248	0.376715374293842
ENSRNOG00000026861	Zscan18	-0.155257234898765	0.586672776439586	-0.360151623282658	0.213203272743145	0.499782361402144	0.0437168693053644	-0.285802636407434	0.326776735053028
ENSRNOG00000050831	Vom2r35	-0.910431850946182	0.305225718824464	0.00751784784091942	NA	0.0248094965264169	0.986723561353095	-0.225088301131478	NA
ENSRNOG00000047703	Vom2r33	NA	NA	NA	NA	NA	NA	NA	NA
ENSRNOG00000046317	Mir295-2	NA	NA	NA	NA	NA	NA	NA	NA
ENSRNOG00000019280	AABR07002093.1	-0.427967314321738	0.355902510380565	0.21864325667212	0.76132826296084	0.0067367282731347	0.995945333913879	0.857038454357834	0.113642433379417
ENSRNOG00000019127	Zfp606	-1.20303682111392	2.70301147048718e-13	-0.550433644347135	0.00532074316302272	-0.767043805854418	1.74550168315945e-05	-0.655203126746163	0.000603676551858484
ENSRNOG00000048663	AABR07002093.2	NA	NA	NA	NA	NA	NA	NA	NA
ENSRNOG00000046802	AABR07002094.1	NA	NA	NA	NA	NA	NA	NA	NA
ENSRNOG00000049902	Vom1r53	NA	NA	NA	NA	NA	NA	NA	NA
ENSRNOG00000055247	LOC100909481	NA	NA	NA	NA	NA	NA	NA	NA
ENSRNOG00000060288	LOC108348260	0.373889038450179	NA	0.582919269923619	NA	0.121328202413763	NA	0.478437716605418	NA
ENSRNOG00000033061	LOC108348135	NA	NA	NA	NA	NA	NA	NA	NA
ENSRNOG00000057670	Vom1r57	NA	NA	NA	NA	NA	NA	NA	NA
ENSRNOG00000049720	AABR07002129.1	NA	NA	NA	NA	NA	NA	NA	NA
ENSRNOG00000049529	LOC108348425	NA	NA	NA	NA	NA	NA	NA	NA
ENSRNOG00000047370	Vom1r51	NA	NA	NA	NA	NA	NA	NA	NA
ENSRNOG00000047230	Zfp551	0.35893995225383	0.0646052460571313	0.039378208216403	0.914210500125179	0.936551268904958	1.94523664405753e-06	-0.29084980715902	0.195248281970823
ENSRNOG00000031210	Vmn1r83	NA	NA	NA	NA	NA	NA	NA	NA
ENSRNOG00000032062	AABR07002140.2	NA	NA	NA	NA	NA	NA	NA	NA
ENSRNOG00000034101	Vom1r47	0.782123863446942	0.404134830395993	0.792600999364123	NA	0.679532243833569	0.459551059306521	0.361293534745421	0.765971930307444
ENSRNOG00000032817	Vom1r46	NA	NA	NA	NA	NA	NA	NA	NA
ENSRNOG00000047429	AABR07071871.1	NA	NA	NA	NA	NA	NA	NA	NA
ENSRNOG00000028882	Vom1r45	NA	NA	NA	NA	NA	NA	NA	NA
ENSRNOG00000052304	AC096201.1	-0.604534437199477	0.487558251770073	-1.0183067831601	NA	0.0708608447253073	0.947798343092267	0.0476479136801422	NA
ENSRNOG00000033483	Vom1r44	NA	NA	NA	NA	NA	NA	NA	NA
ENSRNOG00000032226	Vom1r43	NA	NA	NA	NA	NA	NA	NA	NA
ENSRNOG00000059074	Vom1r42	-0.342611714257417	NA	0	NA	-0.139429091147666	NA	0	NA
ENSRNOG00000028877	Vom1r42	0	NA	0	NA	-0.21637488699166	NA	0	NA
ENSRNOG00000031178	LOC100362054	1.36888901794995	0.0285465563910454	0.213383416209384	0.840568944073429	-0.416399336677927	0.556177038300796	1.38204214708378	0.0602782908533342
ENSRNOG00000019082	LOC103690016	0.732335732315539	0.275378310115167	0.471463239845726	0.608698317250437	1.61650386725733	0.0150372408113871	0.56667074257666	0.496458459961352
ENSRNOG00000050887	Vom1r40	NA	NA	NA	NA	NA	NA	NA	NA
ENSRNOG00000029852	Vom1r41	NA	NA	NA	NA	NA	NA	NA	NA
ENSRNOG00000002628	LOC108348133	NA	NA	NA	NA	NA	NA	NA	NA
ENSRNOG00000049274	LOC102551504	NA	NA	NA	NA	NA	NA	NA	NA
ENSRNOG00000047610	LOC108348164	NA	NA	NA	NA	NA	NA	NA	NA
ENSRNOG00000048033	Vom1r29	NA	NA	NA	NA	NA	NA	NA	NA
ENSRNOG00000047242	LOC100911184	NA	NA	NA	NA	NA	NA	NA	NA
ENSRNOG00000046455	LOC100911224	NA	NA	NA	NA	NA	NA	NA	NA
ENSRNOG00000055229	LOC108348118	-0.183785111699771	0.844850625992139	-0.460281468299265	0.673023503354832	0.177729069659436	0.856273850833513	1.52523639850765	0.0679072053080907
ENSRNOG00000049847	Vom1r27	NA	NA	NA	NA	NA	NA	NA	NA
ENSRNOG00000049412	AABR07002181.1	NA	NA	NA	NA	NA	NA	NA	NA
ENSRNOG00000051882	AABR07002187.1	NA	NA	NA	NA	NA	NA	NA	NA
ENSRNOG00000048370	Vom1r63	NA	NA	NA	NA	NA	NA	NA	NA
ENSRNOG00000062307	AABR07002209.1	NA	NA	NA	NA	NA	NA	NA	NA
ENSRNOG00000047540	LOC103690077	NA	NA	NA	NA	NA	NA	NA	NA
ENSRNOG00000047013	LOC102546678	NA	NA	NA	NA	NA	NA	NA	NA
ENSRNOG00000042030	Nlrp4a	NA	NA	NA	NA	NA	NA	NA	NA
ENSRNOG00000015707	AABR07002241.1	0	NA	0	NA	-0.139429091147666	NA	0	NA
ENSRNOG00000002641	Vom2r28	NA	NA	NA	NA	NA	NA	NA	NA
ENSRNOG00000015271	Zfp418	0.0859280129040844	0.732296755324182	0.0883777965585763	0.799349697136433	0.194348648198457	0.427398347472984	-0.179662459438249	0.516483533223088
ENSRNOG00000056113	RF00100	-0.26999269180599	0.794640563797461	-0.876795973768766	NA	0.0987633421468852	0.930331725722576	0.101972141528819	0.943599730108175
ENSRNOG00000050476	AABR07002247.1	0.321322267752952	0.262138419263047	0.13970183602164	0.749812413473189	-0.0571155121356088	0.877845726003006	-0.0984044585353599	0.819973059680845
ENSRNOG00000060875	RF00100	0.101693020923781	NA	-0.0264188817417236	NA	0.0914082963843131	NA	0.0838376077323763	NA
ENSRNOG00000015598	Zfp978	-0.358476756698886	0.343191912590179	-0.0893221641397452	0.890084198026639	-0.657830065437454	0.0653600138469719	0.40891746247293	0.411187467508059
ENSRNOG00000050407	Hiatl3	0.219778985530921	0.792971151450868	0.112486005225346	0.930556071649959	-0.657350602364492	0.358028000774198	-0.775242067653427	0.319901160801056
ENSRNOG00000046153	LOC108349745	-0.256470468148459	0.661224551817691	-0.00767003808712687	0.99759295276078	-1.56160175901379	0.000350695713796913	-0.715393740205981	0.20845632710204
ENSRNOG00000047061	Zfp773-ps1	-1.31435101341174	0.00415973458358567	-0.00803497998539621	0.997355281933257	-0.410204964219171	0.476317238560267	0.203994079710928	0.802744990477171
ENSRNOG00000022742	Zfp772	-0.0417957488563233	0.895092916601348	-0.0327714639072258	0.945008063341633	-0.0618572920915036	0.850722182702475	-0.548724508494672	0.0291744878035414
ENSRNOG00000059513	LOC102547412	NA	NA	NA	NA	NA	NA	NA	NA
ENSRNOG00000015825	Aurkc	-0.427036014923352	0.000676038370471494	-0.014711967848688	0.960327569387232	0.692197660452806	4.34719883162286e-06	-0.00666166981452898	0.986518147381947
ENSRNOG00000015956	Usp29	-0.779122903301807	1.12035545620064e-10	0.0043944299503051	0.990199646003175	-0.144426743255522	0.329079699319068	-0.625326004685606	7.99844931464118e-07
ENSRNOG00000055983	AABR07002258.1	0	NA	0	NA	0	NA	-0.146999779799603	NA
ENSRNOG00000057261	RF00017	NA	NA	NA	NA	NA	NA	NA	NA
ENSRNOG00000046704	Mir3099	-1.31275367191584	0.122302248477216	-0.873879446138126	NA	0.0611780189914107	0.959039649061792	-0.841309254617336	0.39583801314783
ENSRNOG00000054183	RF02151	-0.440750893518038	0.343342343862665	0.156846540339968	0.837045674665491	1.38769310939548	0.00474154638447678	0.276340611551211	0.672109328555279
ENSRNOG00000014791	Peg3	0.0554343105406003	0.467390635663932	0.250555214647672	0.000111357947375312	-0.0969468479410462	0.156083297599651	0.285343213495013	5.31435502501515e-06
ENSRNOG00000048353	Apeg3	NA	NA	NA	NA	NA	NA	NA	NA
ENSRNOG00000015071	Zim1	-1.41310268204718	1.13040701030393e-08	0.45287306384537	0.238743535842034	-1.38856369226989	7.03905357794546e-08	-0.210816671349186	0.617979449678822
ENSRNOG00000061569	AABR07002262.2	-0.0448500093048591	NA	0	NA	0	NA	-0.223945575643597	NA
ENSRNOG00000041209	AABR07002262.1	NA	NA	NA	NA	NA	NA	NA	NA
ENSRNOG00000015254	Olr3	NA	NA	NA	NA	NA	NA	NA	NA
ENSRNOG00000041737	RF00001	NA	NA	NA	NA	NA	NA	NA	NA
ENSRNOG00000047512	Olr4	0	NA	0	NA	-0.139429091147666	NA	0	NA
ENSRNOG00000045783	Olr6	NA	NA	NA	NA	NA	NA	NA	NA
ENSRNOG00000015289	Olr7	NA	NA	NA	NA	NA	NA	NA	NA
ENSRNOG00000030070	Olr8	NA	NA	NA	NA	NA	NA	NA	NA
ENSRNOG00000057132	AABR07002267.1	NA	NA	NA	NA	NA	NA	NA	NA
ENSRNOG00000042502	Smim17	-1.29257809065283	2.241479399556e-12	-0.414474793566653	0.0880962069053568	-1.83199570579234	1.72844793779565e-23	-0.854711592239687	3.17343121931822e-05
ENSRNOG00000042777	Zfp28	-0.744973712679488	1.58422587735343e-07	-0.083541556221005	0.760587776545943	-0.0038051350633682	0.99236017809341	-0.64238392254246	7.10667156631526e-05
ENSRNOG00000015322	Zfp78	-0.559437142075877	0.0374587353692989	0.00985987927937681	0.989853774194733	-0.25029838127383	0.448230534738051	-0.0203233278336243	0.975465492743764
ENSRNOG00000051384	AABR07002337.1	-0.67179581943945	0.000365707425552598	-0.594184368303217	0.00592346112272225	1.09455800989805	1.13188413884057e-05	-1.24098069372262	7.08120564931882e-11
ENSRNOG00000034184	Zfp583	-0.198467375201927	0.396235478239532	-0.166397497765732	0.602017780924875	-0.0495885014361422	0.873562751019741	-0.377236390360628	0.129973234348726
ENSRNOG00000033906	Zfp667	-0.572437865670895	0.000507137246420281	-1.53707666214646	5.83977171229056e-23	0.311304258223537	0.125621494609203	-1.38647489157683	3.52810757870791e-18
ENSRNOG00000049014	Zscan5b	0	NA	0	NA	-0.139429091147666	NA	0	NA
ENSRNOG00000022129	Galp	-0.840043425260038	0.324269318866093	-0.171449855014748	NA	0.0195714526276907	0.990184150855363	0.222833907511377	NA
ENSRNOG00000015517	Zfp444	-0.0367570551472811	0.795894055840623	0.165710906556436	0.222198895073723	0.423938082097619	6.3380765638552e-05	0.0409124027697901	0.815814992607488
ENSRNOG00000015456	Zfp787	0.0298677270358969	0.931357686035842	0.2738069420645	0.427588572096317	0.00647040756661209	0.990904858476983	0.17960349018935	0.625234139421376
ENSRNOG00000022994	Nlrp5	NA	NA	NA	NA	NA	NA	NA	NA
ENSRNOG00000042719	LOC100911147	NA	NA	NA	NA	NA	NA	NA	NA
ENSRNOG00000021996	Nlrp4	NA	NA	NA	NA	NA	NA	NA	NA
ENSRNOG00000038674	AABR07002351.1	NA	NA	NA	NA	NA	NA	NA	NA
ENSRNOG00000060136	LOC691325	NA	NA	NA	NA	NA	NA	NA	NA
ENSRNOG00000032891	Obox2	NA	NA	NA	NA	NA	NA	NA	NA
ENSRNOG00000036304	AABR07002353.1	NA	NA	NA	NA	NA	NA	NA	NA
ENSRNOG00000048505	Vom1r32	NA	NA	NA	NA	NA	NA	NA	NA
ENSRNOG00000021913	Nlrp9	NA	NA	NA	NA	NA	NA	NA	NA
ENSRNOG00000035686	RF00001	NA	NA	NA	NA	NA	NA	NA	NA
ENSRNOG00000053141	AABR07002353.2	-0.197277961267977	NA	-0.433067011447315	NA	-0.258470388935878	0.73618750790211	0.0385445879565432	NA
ENSRNOG00000049710	Vom1r34	NA	NA	NA	NA	NA	NA	NA	NA
ENSRNOG00000033755	Vom1r35	NA	NA	NA	NA	NA	NA	NA	NA
ENSRNOG00000031899	Vom1r36	NA	NA	NA	NA	NA	NA	NA	NA
ENSRNOG00000038647	Vom1r37	NA	NA	NA	NA	NA	NA	NA	NA
ENSRNOG00000058224	RF00009	NA	NA	NA	NA	NA	NA	NA	NA
ENSRNOG00000038644	Vom1r38	NA	NA	NA	NA	NA	NA	NA	NA
ENSRNOG00000058893	AABR07002382.1	0.187340124992045	NA	0.130655923146968	NA	0.0914082963843131	NA	0.0838376077323762	NA
ENSRNOG00000032913	Rasl2-9	0.18062700121261	0.87143781912118	0.129220080670988	NA	-0.540665711780818	0.573302516354416	0.0607438081866803	0.971557121829237
ENSRNOG00000015743	Rfpl4a	-0.0434972625399348	NA	0	NA	0	NA	0	NA
ENSRNOG00000015753	Epn1	0.753886955052573	2.15756210413782e-19	0.292605474865106	0.00229862814791977	1.12098620750011	2.50078761914128e-39	0.627375876587052	7.09835121122016e-13
ENSRNOG00000015914	U2af2	-0.464258459463033	4.7820803781516e-08	-0.123348904571454	0.310368974804442	0.0395973579214686	0.745329710734714	-0.450176859489253	6.52271699560136e-07
ENSRNOG00000015997	Ccdc106	-0.610659661697759	2.43780092635817e-06	-0.4722816919476	0.00139741012715625	1.2788912953901	2.57514276889134e-14	-1.17063421044447	3.15686681536669e-19
ENSRNOG00000016274	Zfp580	-0.587627929365783	0.0164775988575183	-0.569370640604125	0.0423987166088384	0.343064578484708	0.256902191790329	0.213816644319884	0.570089784302889
ENSRNOG00000054623	RF00026	0	NA	0	NA	-0.139429091147666	NA	-0.146999779799603	NA
ENSRNOG00000016279	Zfp865	-0.445634153451255	0.107196058973465	0.143152913821863	0.759524286990511	-0.156889839792452	0.654348623040753	-0.337017102065312	0.334478152594126
ENSRNOG00000046037	AABR07002384.1	-0.2568182937095	0.408846364990153	-0.00603190950484678	0.995020352088871	1.36700038435551	5.74872768368456e-05	-0.360285353590469	0.309506880857852
ENSRNOG00000028628	LOC100911196	-0.0550810748815061	0.769815337273797	-0.0105391601587513	0.974633460676863	0.813254083418959	7.33294770573384e-08	0.0496118721372057	0.841475524320689
ENSRNOG00000016565	Zfp524	0.196745029416165	0.553512926884954	-0.0318711282497165	0.95685461004167	0.189762706954438	0.591373089094034	-0.0971871235165568	0.834160986094294
ENSRNOG00000016574	Fiz1	0.0221925657373436	0.902460964966692	0.430029660437462	0.00262722519007487	0.501856808497241	0.000266894670530848	0.13982165442764	0.439019369406737
ENSRNOG00000016608	Zfp579	-0.46002843006908	0.0393002350809017	0.0283891106776145	0.953040102612244	-0.5923457117105	0.00843544072159461	-0.0727622778953217	0.852093262638318
ENSRNOG00000042927	Sbk3	-0.120443058383928	NA	0	NA	0	NA	0	NA
ENSRNOG00000038625	Sbk2	-0.214245329573554	NA	-0.179974560116003	NA	-0.549945249929793	NA	-0.433322876883302	NA
ENSRNOG00000016687	Ssc5d	-0.597012799048137	9.30096622223417e-05	0.23889441677658	0.267627460891872	-1.41353180941379	3.14749416965113e-22	-0.0172223443869553	0.960907852457159
ENSRNOG00000042414	Nat14	0.232586154100639	0.277702973663085	-0.0748082606810633	0.826936774737076	0.934590167613417	5.32032624627404e-06	-0.650418203739203	0.000860764166842038
ENSRNOG00000038622	Zfp628	-0.0921488909529866	0.688471278617001	0.0288733458706458	0.939004575634981	0.495806135648377	0.0148442311737654	0.308958206179192	0.191240049164846
ENSRNOG00000050348	LOC684270	0.400889227771548	0.0610930133439558	0.257177059630219	0.366909556031063	-0.038186875611194	0.900914807210589	0.0768511854943358	0.829040384757446
ENSRNOG00000016829	Isoc2b	-0.311912990525674	0.28674774884862	0.00978317251458904	0.989570119119927	0.578023192318788	0.0508557019670717	0.0813961426078022	0.860924988555538
ENSRNOG00000016877	Shisa7	-0.313482796960452	0.00047929994962398	-0.672255371419099	1.1937514870035e-14	2.75112062570801	1.74143214944046e-181	-0.997948352013859	4.96991234391142e-32
ENSRNOG00000016930	Ube2s	0.0572086514330481	0.659924888881944	0.0279359563932383	0.884837435464061	-0.0672513748964087	0.609471132318259	-0.0956384506343549	0.5102264219202
ENSRNOG00000017127	Rpl28	0.0528178946786392	0.689528884354054	0.0627647061972839	0.707708006388666	-0.0848881631052666	0.487762004369147	-0.0214952013030784	0.908695673611089
ENSRNOG00000017306	AABR07071876.1	0.931759239719487	0.115868572613345	0.350501102180419	0.695191380412413	-0.457911449390653	0.472883342033714	0.0744560397630928	0.946110354449219
ENSRNOG00000042528	Tmem190	NA	NA	NA	NA	NA	NA	NA	NA
ENSRNOG00000017386	Il11	-0.0192138587717715	0.98911234711163	-0.288422904303572	0.826265302707922	0.45991544486035	0.625209159027686	0.510494070599815	0.641572702362594
ENSRNOG00000033173	Fam71e2	NA	NA	NA	NA	NA	NA	NA	NA
ENSRNOG00000038616	Cox6b2	-1.1277611764147	0.0101740413859105	0.146584879830833	0.86468769536681	0.623666833892478	0.270737171140676	0.0788095012059265	0.931871140800959
ENSRNOG00000017508	Kmt5c	-0.949385802832479	1.14965347673456e-12	-0.267607780481122	0.131505523572775	0.163954944078867	0.341510016930611	-0.305586888189045	0.0658942621195256
ENSRNOG00000058451	RF00026	NA	NA	NA	NA	NA	NA	NA	NA
ENSRNOG00000028273	Tmem150b	-0.166625997621513	0.846693933908933	-0.312702020083857	0.774290188494069	-1.12531808034598	0.0871073539664486	-0.0901861958503707	0.943905489422975
ENSRNOG00000017673	Brsk1	1.62190187372733	9.04896245113478e-51	0.6115558891271	1.50144600245187e-07	1.64278042883781	2.84407250497221e-51	0.567955922012365	8.87658163594497e-07
ENSRNOG00000017795	Hspbp1	0.493474467856856	0.000154226203705726	0.12898663293587	0.512870219096948	0.340518740497616	0.0173330306848082	0.348092230919275	0.0233860462429306
ENSRNOG00000018090	Ppp6r1	0.206501388666359	0.00497179711273432	0.122945951735841	0.181930803856865	0.899503602610401	7.31834202542055e-37	0.049673998537161	0.646194180961396
ENSRNOG00000038607	Tmem86b	-0.845185049965312	0.0076747040819218	0.237460113970489	0.66116147433478	0.661517980786511	0.0927595874020935	0.168556844912736	0.759875985201924
ENSRNOG00000058906	Ptprh	-1.3170503249088	0.124092298150929	-1.35775138925901	0.165556277422846	-0.825140799470667	0.364995402529845	-1.11609133955766	0.248209166739703
ENSRNOG00000018217	Syt5	1.04372061538181	1.96397327867857e-26	-0.00213832825662217	0.995817901940674	2.37312357238215	1.27051621825457e-92	-0.652768903043968	7.47224299675466e-11
ENSRNOG00000038600	Dnaaf3	0.657906018995057	0.110808984646552	0.380341619156725	0.499084193386119	0.295787331626543	0.537540502989552	-0.568710793670176	0.215466431569184
ENSRNOG00000018250	Tnni3	0.160116040518994	0.819323718888135	-0.524070698089377	0.472371592946787	0.647355645254631	0.324046768346881	-4.33452659670041	5.93620144764384e-23
ENSRNOG00000028041	Tnnt1	-1.33786416355818	3.07476673455669e-05	1.05942676680155	0.0217636059750172	0.177403625181525	0.727628745995506	-2.24101740365226	1.84839294210191e-12
ENSRNOG00000053828	Ppp1r12c	0.368144521959613	8.31413031530471e-08	0.24420076709014	0.00173192868317346	0.599938413416265	7.97459332502915e-17	-0.295574862529817	5.9734449290372e-05
ENSRNOG00000027942	Eps8l1	0.38537633167331	0.637425909049789	0.696104360427043	0.459408743445663	1.53695342603255	0.035877266097665	-1.76083385927276	0.00664131498566406
ENSRNOG00000027919	Rdh13	0.0926750767647247	0.646023641352499	0.0719472391060351	0.799765078080456	0.657351056708206	0.000114146668025637	0.210595618285904	0.321662238157394
ENSRNOG00000057297	AC141517.1	0.226468348078903	0.827637010581669	-0.35062534154832	0.790909810278474	1.50322013498352	0.0647573100790741	0.197649854138904	0.881846059301906
ENSRNOG00000053253	RF00100	NA	NA	NA	NA	NA	NA	NA	NA
ENSRNOG00000047204	Gp6	0.595036780280432	0.53424850395237	0.566181722066156	0.636358357650017	0.270206368107104	0.787602186146236	0.25589702308726	0.838121564988414
ENSRNOG00000049759	Nlrp2	0	NA	-0.100181464385011	NA	0	NA	-0.146999779799603	NA
ENSRNOG00000018458	Ncr1	-0.272835936891715	NA	0	NA	0	NA	0	NA
ENSRNOG00000027855	Fcar	0	NA	0	NA	-0.139429091147666	NA	0	NA
ENSRNOG00000046577	AABR07002409.1	NA	NA	NA	NA	NA	NA	NA	NA
ENSRNOG00000027843	Kir3dl1	NA	NA	NA	NA	NA	NA	NA	NA
ENSRNOG00000027811	Lilrb4	-1.81108283749827	0.0191622052797241	0.212773935159364	0.88394444524042	-1.74451928392491	0.0252930463686432	-0.0528031517880161	0.976859451302323
ENSRNOG00000048238	AABR07002418.1	NA	NA	NA	NA	NA	NA	NA	NA
ENSRNOG00000046683	Lilrb3	-3.2283088414417	9.17563711146546e-12	-0.646213305139109	0.389760365459041	-2.89554570758204	2.16228905927547e-09	-1.30704597786755	0.0268399220213014
ENSRNOG00000027808	Lilra5	-0.591084436322385	0.440028773770393	0.746195772450565	0.433182455297723	-0.603438300259794	0.433223055674014	0.637582484543142	0.495435818329086
ENSRNOG00000018616	Cdc42ep5	0.239941553117027	0.708259914260193	0.871324853469872	0.174605898104941	1.06499102566078	0.0587638581140372	0.851422988248704	0.179766651364257
ENSRNOG00000018621	Leng9	-0.131523713307554	0.703741858075611	0.270674007705573	0.509259932773428	0.268108496680207	0.439175606649142	0.131439424702788	0.775363429974921
ENSRNOG00000018642	Leng8	-0.601298322695963	4.67039332070905e-08	-0.0278979470284051	0.898844332514346	0.782617185986127	8.20853511205004e-13	-0.0368442768289374	0.848187769138845
ENSRNOG00000032699	Ttyh1	0.510048396556527	3.42427025550945e-08	0.054803514013835	0.735224895699383	0.467467775649754	4.55324736244114e-07	-0.127139665997924	0.290065052278104
ENSRNOG00000059590	RF00003	NA	NA	NA	NA	NA	NA	NA	NA
ENSRNOG00000027733	Lair1	-0.196245409958211	0.830757725908518	0.389490398592302	0.731519276736912	-0.539798571884694	0.502607079690594	0.00534082940602931	1
ENSRNOG00000027705	Nlrp4b	NA	NA	NA	NA	NA	NA	NA	NA
ENSRNOG00000015527	LOC100912013	NA	NA	NA	NA	NA	NA	NA	NA
ENSRNOG00000038497	Vom2r29	NA	NA	NA	NA	NA	NA	NA	NA
ENSRNOG00000038479	AABR07002467.1	NA	NA	NA	NA	NA	NA	NA	NA
ENSRNOG00000046339	AABR07002473.1	-0.0272307162831973	NA	-0.0232356685410181	NA	0.01446250054032	NA	0.00689181188838312	NA
ENSRNOG00000031562	Vom2r31	NA	NA	NA	NA	NA	NA	NA	NA
ENSRNOG00000049668	Vom1r58	NA	NA	NA	NA	NA	NA	NA	NA
ENSRNOG00000048095	RGD1564801	0.387202293899016	0.696803686372912	-0.0190785177061041	0.994153329713542	-0.0556324561861568	0.9635903073308	-0.656993014885521	0.5265726530805
ENSRNOG00000030886	Vom1r59	NA	NA	NA	NA	NA	NA	NA	NA
ENSRNOG00000047490	Vom1r60	NA	NA	NA	NA	NA	NA	NA	NA
ENSRNOG00000047206	LOC100911727	-0.0524318823819058	NA	-0.0932571394724438	NA	0.0144625005403198	NA	0.00689181188838302	NA
ENSRNOG00000014181	Vom1r61	NA	NA	NA	NA	NA	NA	NA	NA
ENSRNOG00000032819	Vom1r62	NA	NA	NA	NA	NA	NA	NA	NA
ENSRNOG00000014186	Zswim9	0.181699647106908	0.361427586653537	0.0529443174993284	0.871642571406533	0.142208440304032	0.525191772453877	0.0420409911135963	0.899016031203126
ENSRNOG00000014193	Lig1	-0.745590655972528	0.00113998792562963	0.139270294768468	0.73243685045912	-0.387807579103877	0.138057938488411	0.217687602031053	0.533605332751831
ENSRNOG00000026764	Pla2g4c	0.110394329148052	NA	-0.0232356685410181	NA	0.0144625005403199	NA	0.00689181188838295	NA
ENSRNOG00000056949	RF00100	NA	NA	NA	NA	NA	NA	NA	NA
ENSRNOG00000056331	AC127640.1	-1.16999400134867	0.14379955040614	-0.776125912544937	0.465434460436457	0.299123888883882	0.767085244471855	-0.637868738262928	0.542291716234717
ENSRNOG00000054798	RF00100	NA	NA	NA	NA	NA	NA	NA	NA
ENSRNOG00000061661	AABR07002493.1	NA	NA	NA	NA	NA	NA	NA	NA
ENSRNOG00000061148	RF00100	NA	NA	NA	NA	NA	NA	NA	NA
ENSRNOG00000014787	Cabp5	NA	NA	NA	NA	NA	NA	NA	NA
ENSRNOG00000052287	AABR07002496.1	NA	NA	NA	NA	NA	NA	NA	NA
ENSRNOG00000046669	AABR07002499.1	NA	NA	NA	NA	NA	NA	NA	NA
ENSRNOG00000056605	RF00560	NA	NA	NA	NA	NA	NA	NA	NA
ENSRNOG00000047986	Sult2a2	NA	NA	NA	NA	NA	NA	NA	NA
ENSRNOG00000054447	RF00026	NA	NA	NA	NA	NA	NA	NA	NA
ENSRNOG00000031005	AABR07002523.1	NA	NA	NA	NA	NA	NA	NA	NA
ENSRNOG00000048028	AABR07002546.1	-0.230033208496114	0.745266663544497	-0.547380554873754	0.481025554735666	0.427209666042743	0.558407497524705	0.962035454364509	0.204099658631287
ENSRNOG00000052468	RF00026	NA	NA	NA	NA	NA	NA	NA	NA
ENSRNOG00000022227	AABR07002564.1	0.267232021622295	0.277283878594493	0.631480897851562	0.0125645297526935	0.719864764292815	0.00280284725943724	0.55563327313498	0.0349039404361494
ENSRNOG00000013548	Selenow	NA	NA	NA	NA	NA	NA	NA	NA
ENSRNOG00000033146	LOC103690015	-0.48324810461903	0.527984154288085	-0.0473440173034625	0.974633460676863	-0.512428630358527	0.510054660665551	-0.997947747026365	0.187162351070867
ENSRNOG00000038276	AABR07002622.1	NA	NA	NA	NA	NA	NA	NA	NA
ENSRNOG00000013890	Crx	NA	NA	NA	NA	NA	NA	NA	NA
ENSRNOG00000038251	AABR07002623.1	0.0102664048118415	0.995756225548855	-0.237100445700108	NA	-0.0605470526774888	0.956956591725392	-0.618316168778494	0.526915290541881
ENSRNOG00000051483	Selenow	1.89711641042608	3.39610859569022e-76	0.412821269706889	0.000308095369580851	1.19522787815564	5.81959030429997e-30	-0.0362033812239586	0.84282474450453
ENSRNOG00000028449	LOC100364457	1.46680722723894	0.000775152367984574	1.31445985710703	0.00624817923488499	2.06164448445222	2.92283295680887e-06	0.966927815084373	0.0501711811058173
ENSRNOG00000013023	Nop53	-0.218114627437809	0.00659094723847785	0.292230026204532	0.00104010475891442	0.154106751088198	0.0951608745246594	0.159983347828722	0.113587016078998
ENSRNOG00000059444	RF00603	-0.0390351632390146	NA	-0.100181464385011	NA	0	NA	-0.223945575643596	NA
ENSRNOG00000011346	Ehd2	0.36424810251916	0.160776413054897	0.510858786409567	0.0721110310805591	-0.167714256710288	0.568022198275164	0.344597894573225	0.254166778311523
ENSRNOG00000011262	Bicra	-0.498150711652876	0.000462895243713788	0.00719681372747084	0.98485595455221	0.338875900889494	0.0298672556361011	0.170776905609597	0.380347047759121
ENSRNOG00000021800	Zfp541	-0.971755291406335	0.116205056012919	-1.15786610082765	0.0910540165268033	0.0584011816028074	0.95242513509263	-0.731236976585818	0.332792131377581
ENSRNOG00000001494	Napa	1.05684968145195	4.034639527635e-21	-0.0735919583008616	0.709060164310161	0.728394574051066	2.23632332203991e-10	0.382899246621715	0.00230206507526359
ENSRNOG00000001493	Kptn	0.122918165274845	0.288757870177031	0.12157754033915	0.407683313600036	0.603799692665886	5.61423462031873e-08	-0.166736777240529	0.198819926636353
ENSRNOG00000001492	Slc8a2	2.46290102164837	1.38707548488006e-73	-0.393614788218655	0.0144121781602624	3.71341562373652	5.12878946551334e-140	0.266266985679263	0.113471719063029
ENSRNOG00000021390	Meis3	-0.883705577514228	1.91728532744567e-12	0.218054471735663	0.235541092201802	0.749539604309304	4.59066232780114e-07	-0.397918463670994	0.00826837256667012
ENSRNOG00000047575	Dhx34	-0.236615398544862	0.259029073558282	0.477036173072912	0.0341941505857031	-0.0292703747674101	0.92198763548842	0.180755938535631	0.513326548515979
ENSRNOG00000060587	AABR07002627.1	0	NA	0	NA	0	NA	-0.146999779799603	NA
ENSRNOG00000049028	C5ar2	-0.467510290174912	0.407081322038783	-0.263586868942032	0.754038602489007	-0.642142021699336	0.246092953099874	-0.194326723249626	0.817677121272848
ENSRNOG00000047800	C5ar1	-0.147576157066321	0.769095220539818	0.265935946374702	0.684226777023553	-1.55460628156984	1.31026473567797e-05	0.0173788787746803	0.987506428441477
ENSRNOG00000049661	Inafm1	0.205609785751212	0.588688248163894	0.187487784785463	0.712080783537005	-0.0222615808248874	0.963990427785541	0.269411959315528	0.540911643944354
ENSRNOG00000048848	Ccdc9	-0.175602912907526	0.0786686570897467	0.241479320580809	0.026093893010612	0.809456717288615	2.24167028823645e-17	0.178794885683853	0.115787597700906
ENSRNOG00000015128	Sae1	0.0759699297517227	0.554963284976215	0.189976061927886	0.146379849823131	0.0497475154626625	0.721627799142039	0.271433051640145	0.0241875622352185
ENSRNOG00000053001	AABR07002644.1	NA	NA	NA	NA	NA	NA	NA	NA
ENSRNOG00000015229	Zc3h4	-0.258075080841289	0.00168748065576447	0.0412649736984429	0.779972182910393	0.328727785231021	0.000145814423733628	-0.072961909605468	0.543388163811764
ENSRNOG00000015304	Tmem160	0.80236695553652	0.00132762090393367	0.0780023169191712	0.866019649409562	0.322504006409153	0.267926678656076	0.642434364447414	0.0276568973713898
ENSRNOG00000015376	Npas1	3.55594100308569	1.62473151473837e-27	-0.565686757409104	0.0670298123927782	0.714287322958625	0.0153868292475034	1.97919859359885	1.24801437046038e-09
ENSRNOG00000015852	Arhgap35	0.319070988105735	5.759942057014e-10	0.103459298733005	0.117835833902147	0.337296711548127	1.39180134029767e-10	0.382234030138868	8.50222344770591e-13
ENSRNOG00000038205	LOC108349548	0.392943560605266	0.677258156762193	0.816001503454471	0.432184000457183	0.897140740960108	0.289046948507759	1.18674486971012	0.188870749559825
ENSRNOG00000028617	LOC108349752	-0.0484190556998392	NA	0.0715619363834016	NA	0.153196569712664	NA	-0.147386867749672	NA
ENSRNOG00000046915	Ceacam9	0.387243024861632	0.691434161792642	0.456896597683176	NA	-0.584293431698427	0.50856112767597	0.547490149476171	NA
ENSRNOG00000015865	Ap2s1	0.335279377915275	0.0108258266120102	-0.0824660552815741	0.697172849035208	0.150217534094174	0.322450449900554	0.129893200295865	0.466550831822397
ENSRNOG00000034106	AC127887.1	0.200249650056998	NA	0.00306521710552625	NA	0.200333049394646	NA	0.190502644991172	NA
ENSRNOG00000015948	Slc1a5	-0.355470613854029	0.253897827964437	0.983829962507714	0.00515447341809111	-2.09535678217698	4.52911938761587e-17	0.266016587066793	0.548805273474651
ENSRNOG00000016055	Fkrp	1.05857468068025	2.46943544819863e-25	0.281668225205683	0.0211532321038434	0.34539020617726	0.00200318434453219	0.370366540891767	0.00157796591092192
ENSRNOG00000016145	Strn4	0.714861048999027	5.98638789510826e-18	-0.342801399801755	0.000162460943554651	1.09642912818287	1.14493380926133e-37	0.0377321040381816	0.792471744203661
ENSRNOG00000016434	Prkd2	0.672049691809295	1.84227208715006e-08	-0.025030638179388	0.920730386970023	0.914653181394474	9.84811629823244e-12	0.540222972071736	0.00010016256118826
ENSRNOG00000052256	Dact3	1.40813236746979	1.74972825578659e-30	0.467015283223822	0.000747130160420408	0.773944728233041	9.37092331550954e-10	0.745085160469201	9.69419983935831e-09
ENSRNOG00000016701	Gng8	0.403202269391554	0.0762475388655492	0.0185590045085491	0.969852482567136	-1.90983971251723	7.70134720203911e-25	-0.0533132942280185	0.894709791323876
ENSRNOG00000016756	Ptgir	-0.210190122658929	0.807227154647246	-0.193041574071288	0.872547936314118	0.0907196007229713	0.930065521883547	-0.482334932457479	0.605829752972248
ENSRNOG00000016770	Calm3	1.15392754343462	2.49425135144432e-74	-0.0677520376486098	0.496833617473772	0.722460438969373	2.20356034637383e-29	0.660937562836326	3.13096584855921e-24
ENSRNOG00000016863	Pnma8b	-0.480117689370535	1.46784765985716e-07	-0.320622233650067	0.00158514611506474	0.406560884719826	1.52227038979621e-05	-0.312092190038826	0.00170778267877013
ENSRNOG00000027944	Pnma8a	0.0900306752577001	0.568896856851774	0.00481093179165442	0.989160827486041	1.53892332633343	6.40961367045357e-33	-0.338668981150903	0.0130011148503207
ENSRNOG00000027936	Ccdc8	-0.670541164085916	0.000562065559402178	0.092990155305501	0.806570232730723	-0.295829808264173	0.218452949919623	0.127202286764467	0.71315410937835
ENSRNOG00000016907	Ppp5c	0.336630800418502	3.56467890089335e-05	0.0841852982888993	0.494117649153232	0.208743208429242	0.0195600086845756	0.92041296650646	6.33700357964086e-26
ENSRNOG00000017198	Hif3a	-0.822610668900085	0.111698643042374	0.0955417243227277	0.921744486613675	1.22480479846819	0.0178690706017996	-0.278778024411735	0.700914550947823
ENSRNOG00000042250	Psg16	-0.117786191076795	NA	-0.100181464385011	NA	0	NA	0	NA
ENSRNOG00000027607	Ceacam3	NA	NA	NA	NA	NA	NA	NA	NA
ENSRNOG00000027288	Psgb1	NA	NA	NA	NA	NA	NA	NA	NA
ENSRNOG00000029485	Psg29	NA	NA	NA	NA	NA	NA	NA	NA
ENSRNOG00000034000	AABR07002659.1	NA	NA	NA	NA	NA	NA	NA	NA
ENSRNOG00000017519	LOC102557244	NA	NA	NA	NA	NA	NA	NA	NA
ENSRNOG00000017620	Ceacam11	NA	NA	NA	NA	NA	NA	NA	NA
ENSRNOG00000042158	Igfl3	NA	NA	NA	NA	NA	NA	NA	NA
ENSRNOG00000032940	AC093995.2	NA	NA	NA	NA	NA	NA	NA	NA
ENSRNOG00000017699	Mill1	0.92537293990042	0.287052833302375	0.987795754854317	0.335801558278744	0.683466895922863	0.448651908862436	0.442214810705944	0.697855508713927
ENSRNOG00000044940	RF00001	NA	NA	NA	NA	NA	NA	NA	NA
ENSRNOG00000038101	LOC102557319	NA	NA	NA	NA	NA	NA	NA	NA
ENSRNOG00000026891	AC093995.1	0.0953343984690972	NA	0.232721606260589	NA	0.0259535812779283	NA	0.0124515665886536	NA
ENSRNOG00000051815	AC093995.3	0.130410325865081	NA	-0.121837303496679	NA	0.0175888032628466	NA	-0.0851972823191048	NA
ENSRNOG00000057645	Micb	-0.230189579857824	0.624196096964176	0.39584073899516	0.489188697286646	0.473562469449734	0.319277034332341	0.0023499140215075	1
ENSRNOG00000013395	Pglyrp1	0.0396963504749838	0.957578641819336	0.125989341654905	0.892531624545136	-0.264862547008498	0.672737416286404	-0.174755089032427	0.832592475297882
ENSRNOG00000013767	Ccdc61	0.0845558118446312	0.816267949873632	0.242159513338818	0.56535163776808	-0.368886919230252	0.228892345671328	0.112293798756324	0.813168277262627
ENSRNOG00000013847	Nova2	0.0796444059579836	0.608459822870604	-0.273217607061294	0.0567174710010006	1.7959894513365	1.57995458711985e-33	-0.323523449064984	0.0185656336112721
ENSRNOG00000038088	Nanos2	0.705574640922779	0.459457859281836	-0.208830707302643	0.887296537708383	-0.0784123668506858	0.949579883174897	1.20984761063384	0.194806635159664
ENSRNOG00000014132	Mypop	0.92177136801355	2.96697033113497e-14	0.570828156852423	1.98473657371584e-05	0.546250239745076	3.50640362799178e-05	0.292139542126189	0.0504840462267585
ENSRNOG00000038087	AC110846.1	-0.0434972625399348	NA	0	NA	0	NA	0	NA
ENSRNOG00000014252	Irf2bp1	-0.172217383586525	0.27454693513466	0.0627427177385983	0.804880555872838	-0.0249702868191486	0.908381826992323	0.0333563355010214	0.900974632736607
ENSRNOG00000014256	Foxa3	0.695066721693444	0.43827396107479	0.513398704888535	NA	0.642389131347845	0.454769210706251	0.0224024977576457	0.992439040808946
ENSRNOG00000014353	Sympk	0.330283553423229	0.000518620325668753	0.023490994854104	0.898749433868219	0.0892713921520079	0.444324300776608	-0.345083922356583	0.000530196209957498
ENSRNOG00000061526	Rsph6a	1.63024863677472	0.000991004258337964	0.568293084067519	0.397707680722037	1.30064474409605	0.0166935090904541	2.08703329375327	0.000449328604690661
ENSRNOG00000014984	Dmwd	0.0788276560657532	0.456334191469503	-0.0688549240512391	0.622936060587199	0.735124002069246	2.79658275095538e-15	-0.222875417241628	0.0262568983582684
ENSRNOG00000015085	Dmpk	-0.186300411377962	0.251111157253385	0.361790677131597	0.0281076958553696	0.366103602178178	0.0149441928839816	0.369643948283449	0.0214314341048385
ENSRNOG00000047435	AC120692.1	-0.180701069734241	0.83038553075333	-0.281115393008004	NA	-0.204689659584503	0.796437199998747	0.142875025103549	NA
ENSRNOG00000060146	Six5	-0.361620074814032	0.393101966145279	0.184801112629627	0.777803916196535	0.215257956634782	0.663166733854417	0.343939091822566	0.530599562972493
ENSRNOG00000008815	Fbxo46	-0.445778322224572	0.0179135927035857	-0.467217598422603	0.029424447857143	-0.0645657962511781	0.814728971668936	-0.664548471543904	0.00092442449392131
ENSRNOG00000015413	Qpctl	0.00273222397303485	0.988990973075292	0.119720408036648	0.428318571153098	0.102443436952222	0.439054163822983	0.17197346150909	0.212077961722274
ENSRNOG00000015844	Snrpd2	-0.176339738827353	0.366688724461582	-0.271366828859314	0.210256369790361	-0.734295893967043	7.77368261230533e-06	-0.552551799633002	0.00205167500115247
ENSRNOG00000015860	Gipr	-3.97600936948835	2.80156388340925e-76	-0.845035302923267	0.00184817280283224	-0.107639805137684	0.769622377655329	-2.19545536139013	2.46537156523043e-21
ENSRNOG00000030127	Eml2	0.4945703478759	6.33031286327546e-09	-0.121067191188273	0.309383984682401	-1.00806180727697	6.1448285319166e-35	-0.253602879059914	0.00828361238410593
ENSRNOG00000035565	Mir330	-1.14000274148499	0.19478202716158	-0.30579770440997	NA	-0.808757797775474	0.365133040231028	-0.578879852030031	NA
ENSRNOG00000016362	Gpr4	0.587679802531128	0.0532997584011901	0.666247248517264	0.0536766376040353	0.682014082072832	0.0317409857081117	0.360577080836291	0.34991749670664
ENSRNOG00000025890	Opa3	0.38595310012546	0.000232108518803186	0.234297378078295	0.0682690990642198	0.41508402689397	0.000244086399319594	0.534354028320752	4.84300514407875e-06
ENSRNOG00000056238	RF00003	0.561115654139433	0.567008738332696	0.00199725104283998	1	1.11332438459208	0.195603688499222	0.844418559978485	0.408664545075463
ENSRNOG00000016367	Vasp	-0.621554800694355	5.61674486825918e-05	0.140159348998008	0.58992326122277	-0.777419967456693	8.97394168312544e-07	0.0200199328879471	0.956346547215066
ENSRNOG00000059266	AABR07002674.1	-0.327657817844952	0.70712055386625	-0.371171820568695	0.744333037500544	-0.211246757160582	0.821590002815595	-0.0174452096421396	0.994731511666986
ENSRNOG00000016603	Rtn2	0.960382644388566	4.64117581817433e-24	0.603844620408884	2.97339956740398e-09	0.77859509289249	1.14620166803263e-14	0.320628760527707	0.00351618452966124
ENSRNOG00000046667	Fosb	-1.58187023962058	1.75385931200969e-11	1.17934970659167	8.85532859265906e-06	4.55703914792326	2.02977699613224e-35	-0.0625888681650783	0.88946147502056
ENSRNOG00000017839	Ercc1	0.285318067861176	0.0470955905099869	0.0951179116448061	0.674672339137191	0.357664815638368	0.020869747293906	0.193227544355368	0.30338626803738
ENSRNOG00000016825	Cd3eap	-0.0267989731798618	0.937119759787142	-0.222417621296464	0.515067624255369	-0.0853498737814489	0.791886193988438	-0.0945474276898334	0.814194678566119
ENSRNOG00000025350	Ppp1r13l	-0.309349612203148	0.28946237893202	-0.145851298298966	0.743928516588544	0.28842149527103	0.376840818602694	0.0867112864112662	0.852900739508234
ENSRNOG00000017753	Ercc2	0.218150787947359	0.075018809225539	0.292795495016856	0.031658862350548	0.53613250653893	1.66859064776097e-05	0.151244393603702	0.338376786645888
ENSRNOG00000036303	Mir343	0.0747411236955004	NA	-0.376082959629077	NA	-0.346310108784874	NA	-0.171818446532339	NA
ENSRNOG00000018101	Klc3	-0.357345569957649	0.695841296139022	-0.722901719058264	0.470054887133874	-0.116315754326422	0.914105983075409	0.623797409407365	0.545368995704893
ENSRNOG00000016837	Ckm	-0.421165584383342	0.673672796186613	-0.299379149925932	0.823548020753142	-2.61224299401921	0.000548578872374668	-0.44407416791189	0.687270421531453
ENSRNOG00000029745	AABR07002677.1	-0.126024998151244	0.910163722949933	-0.64506491378777	NA	-0.216940282582342	0.832528829619408	-0.470387532098888	0.673011476265597
ENSRNOG00000017069	Mark4	0.79819774490995	2.96686502826371e-13	-0.386809912770395	0.00148172763502868	0.604005581621982	1.44033247628751e-07	0.463399944452922	0.000130226129379086
ENSRNOG00000052756	RF00003	NA	NA	NA	NA	NA	NA	NA	NA
ENSRNOG00000060041	AABR07002677.2	-0.209829831286144	0.844123833265361	0.348542703543882	NA	-0.639087849918587	0.476317238560267	0.442278604249239	NA
ENSRNOG00000017448	Exoc3l2	0.251202477124777	0.637920200026396	0.514122436910055	0.393701428549564	-0.0310712123590207	0.963959876592941	-0.298918142022032	0.627644760731174
ENSRNOG00000017463	Bloc1s3	0.103176563704378	0.87181286140048	-0.590405417527732	0.32920501158057	-0.700299054712888	0.162348523936335	-0.385404345613209	0.559559070299077
ENSRNOG00000017468	Trappc6a	-0.0871486679680625	0.871986874327847	-0.129215854963208	0.855699830002318	-0.573610767833031	0.176520430122715	-0.17408177451308	0.781663585160961
ENSRNOG00000043378	Nkpd1	0.976611783867177	0.0347088459231291	-0.59894908568924	0.276533038402433	0.775157945604654	0.135963941403797	-1.2993896140077	0.00269578308660992
ENSRNOG00000017692	Ppp1r37	0.472502175759002	3.89770659388281e-09	0.158539364673994	0.126629358715196	0.817866345606652	1.71750729336296e-22	0.262837516285617	0.00419973647018108
ENSRNOG00000049772	Gemin7	0.241815760149597	0.420084178478094	0.180786234443039	0.66628629548232	-0.338607308949392	0.245005537531845	0.31064570418022	0.392354616162938
ENSRNOG00000049605	Zfp296	1.84975072538626	0.0112299592969208	0.269271443498951	0.827975509778404	0.279626607698436	0.75997011828803	1.21949474285209	0.1545467672613
ENSRNOG00000046000	Clasrp	0.0374811477702622	0.789587140672501	0.101022273891448	0.511157934063691	0.600541897018112	8.01901755962758e-09	0.212129256918031	0.083087593061668
ENSRNOG00000033235	Relb	-0.738997608548161	0.0270350750901172	-0.0136032672440595	0.988544268507737	-0.414942039724504	0.281748076076904	0.158272001907216	0.78115774254862
ENSRNOG00000018255	Clptm1	0.162810724161575	0.00160357349324954	-0.0685387059516427	0.33411289466385	-0.179482528692022	0.000725723137225112	-0.193535405557309	0.000458575473064766
ENSRNOG00000018402	Apoc2	-0.396375555450005	NA	-0.257589425734495	NA	0.0730241916324292	0.937623782115437	-0.324094674684387	NA
ENSRNOG00000018405	Apoc4	-2.73348770250243	2.70563970638539e-05	-1.3240433141111	0.116975775656927	-0.553771422706784	0.532735749882093	-0.972149872180793	0.277928102620003
ENSRNOG00000018426	NEWGENE_2134	-1.38480536178798	0.0131770544948361	-1.94110066660656	0.000666796637815689	0.182570572913561	0.808257464268813	-0.839728741289916	0.206190069459366
ENSRNOG00000018454	Apoe	-0.153284756747649	0.31655568160924	-0.0999409152574983	0.627758630947998	0.10803125190666	0.492571780909389	0.278078590220583	0.059519701675786
ENSRNOG00000018556	Tomm40	0.292553932592443	0.010541577112279	0.0690477494002965	0.717143980630274	0.250386919336828	0.0465763428468774	-0.101505958823903	0.533020275952095
ENSRNOG00000018730	Nectin2	-0.620881695728388	0.00202128901025151	0.0247020794972695	0.95761084624883	-1.88558531607935	2.54644984885503e-24	0.0640171781905224	0.865647109959741
ENSRNOG00000029399	Bcam	0.502872539957666	0.124313567328793	0.80546890934061	0.0171191598046715	0.0553506159008091	0.898950977489037	0.396905212983318	0.295187267134253
ENSRNOG00000018953	Cblc	-0.120443058383928	NA	0	NA	0	NA	0	NA
ENSRNOG00000043416	Bcl3	-0.511748555789184	0.473515102837077	0.700944327435178	0.423315898473734	-0.325771913725746	0.672753346536243	0.350803947281857	0.711380438371878
ENSRNOG00000031391	Ceacam16	1.10815662440892	0.213051906336482	0.32938150950839	0.814400289476789	-0.707980019821243	0.448502112489901	0.279975942517453	0.82905575978174
ENSRNOG00000054552	AABR07002680.2	0	NA	-0.177127260229005	NA	0	NA	0	NA
ENSRNOG00000047795	AABR07002680.1	0	NA	-0.100181464385011	NA	-0.139429091147666	NA	0	NA
ENSRNOG00000043088	Ceacam19	NA	NA	NA	NA	NA	NA	NA	NA
ENSRNOG00000019202	PVR	-0.590552281220173	0.100581479397416	1.34104880705532	0.000331501857214129	0.557519386883776	0.143873578346248	0.435705238316844	0.326450140562622
ENSRNOG00000024630	Igsf23	-0.0434972625399348	NA	0	NA	-0.139429091147666	NA	0	NA
ENSRNOG00000019260	Ceacam20	NA	NA	NA	NA	NA	NA	NA	NA
ENSRNOG00000029336	Zfp180	0.671849629270093	9.51031144848487e-06	0.427575220452341	0.0133639088501427	0.840812226472847	1.95706422569032e-08	0.0868768655668318	0.711313618989899
ENSRNOG00000056832	AABR07002682.1	0.678627153797552	0.440427095457046	0.144378716893687	0.921968260920893	0.707404437522541	0.421820994346719	-0.0885770936489534	0.953034000788485
ENSRNOG00000029022	Zfp112	-0.187347296305064	0.424609475486162	-0.40558237712745	0.0919322942889786	0.103875623480535	0.714190799910339	-0.141929796791281	0.653979467067842
ENSRNOG00000032625	AC118165.1	0.105688004864568	0.681143088449657	0.00940025366722229	0.985776569600847	0.650653369958135	0.0031943622493325	0.0329572285894102	0.935150806032873
ENSRNOG00000054609	AABR07002683.1	-0.198696331325348	0.316947784060756	0.0584783194206375	0.858541645534104	0.660478262616765	0.000652597698733606	0.185661768337069	0.460684040634741
ENSRNOG00000024376	Zfp111	-0.115063645239686	0.652090630593688	0.154121296191855	0.629759761753653	-0.417339761365763	0.0477284755230315	0.0398413586978574	0.918006477478379
ENSRNOG00000019416	Zfp61	-0.0441918639423952	0.91963013715973	0.0762908346504976	0.893176054185777	0.530481162925616	0.0977620893261909	-0.0944774933113167	0.850248100870398
ENSRNOG00000055608	LOC102548695	0.577044987106468	0.000594698345566478	0.899144930704927	2.09667578966223e-07	1.21019229569338	1.05912756569706e-12	0.288423811219574	0.157830940545164
ENSRNOG00000019427	Tescl	0.187340124992045	NA	0.130655923146968	NA	0.0914082963843132	NA	0.0838376077323762	NA
ENSRNOG00000019432	Lypd5	-2.60713422665482	4.01693946352099e-07	0.54792243693492	0.533437707919365	0.990841917757554	0.14917456750416	0.665999248947097	0.413216701287572
ENSRNOG00000019440	Kcnn4	-1.96522361844707	5.71585400307873e-05	1.13180972153853	0.113227396422804	0.0166159370057315	0.989088685927939	0.362565996485772	0.674117441083007
ENSRNOG00000019596	Smg9	0.21753638801492	0.156860971299711	0.634508024610945	2.23958724090259e-05	0.659128441137628	8.14429883783612e-06	0.239962454852035	0.174391906781003
ENSRNOG00000024257	Irgc	-0.0518642223270002	0.968026689185798	0.00630232067929452	0.999805115060116	0.494321591546491	0.614208581368277	-0.0402580213691031	0.984014385499109
ENSRNOG00000037931	Plaur	-2.1633496565051	3.97791595169267e-06	1.21815550125582	0.0801122782040404	1.65298820933673	0.0111973769091568	-0.0201733485859249	0.989767728177281
ENSRNOG00000024243	Cadm4	0.308700287420986	0.00117675833360378	0.422073399590411	1.82621958620671e-05	-0.811454299286947	5.78011518170612e-20	0.243358689246732	0.0220291989342678
ENSRNOG00000019802	Zfp428	-0.303469605099211	0.062692350894019	-0.0568844182327697	0.846604902959785	0.859469477117876	1.70829411060353e-06	-0.622185479322438	0.000137229439224675
ENSRNOG00000050032	AABR07002689.1	NA	NA	NA	NA	NA	NA	NA	NA
ENSRNOG00000046500	Irgq	0.660923695513397	0.000319502784980422	0.268934553065858	0.274867108925809	0.948587653217723	6.46343751964683e-07	0.355535857572128	0.108769199898932
ENSRNOG00000019862	Pinlyp	-0.0910536575242379	NA	-0.272416542475961	NA	-0.545580439793819	NA	-0.191205828001324	NA
ENSRNOG00000019915	Xrcc1	-0.236882572042479	0.0164753247530735	-0.313267500951044	0.00288529231778868	0.575510633837932	1.74629297482257e-08	-0.25744520809782	0.0186238235923067
ENSRNOG00000024065	Zfp575	0.353797799986454	0.148863821984698	0.239597295417809	0.465606761756888	2.66245518486438	1.16751066993293e-17	-0.207490932070438	0.510959906115829
ENSRNOG00000019982	Ethe1	0.621905901401735	0.00814001933385428	0.602229593442046	0.0262738460453055	-0.0904527734980864	0.770161020668666	0.439071148766694	0.128464053948027
ENSRNOG00000055259	Phldb3	-0.781017847405786	0.277887222736882	0.788868965330338	0.392218345588858	0.0233491309378916	0.985509531587736	0.437320922833006	0.656584629798635
ENSRNOG00000019999	Lypd3	-2.04916317065552	0.00785574339091669	-0.586007773292442	0.633498091926292	-1.89233738920541	0.0159712972797066	0.190824818077421	0.88979636888765
ENSRNOG00000020057	Tex101	NA	NA	NA	NA	NA	NA	NA	NA
ENSRNOG00000033358	LOC100910565	NA	NA	NA	NA	NA	NA	NA	NA
ENSRNOG00000049821	LOC100909620	NA	NA	NA	NA	NA	NA	NA	NA
ENSRNOG00000045922	LOC100910611	NA	NA	NA	NA	NA	NA	NA	NA
ENSRNOG00000049317	RGD1565655	NA	NA	NA	NA	NA	NA	NA	NA
ENSRNOG00000048783	LOC100909700	0	NA	0	NA	-0.139429091147666	NA	0	NA
ENSRNOG00000050105	Ceacam4	NA	NA	NA	NA	NA	NA	NA	NA
ENSRNOG00000030331	Ceacam6	NA	NA	NA	NA	NA	NA	NA	NA
ENSRNOG00000020098	Lypd4	NA	NA	NA	NA	NA	NA	NA	NA
ENSRNOG00000020109	Dmrtc2	NA	NA	NA	NA	NA	NA	NA	NA
ENSRNOG00000037897	Rps19	-0.404011808869907	0.663277985373604	-0.129437121301748	0.930556071649959	0.301223706932008	0.756620484275816	-0.39460957367606	0.721012839808287
ENSRNOG00000020125	Cd79a	-0.536001604451813	0.493964541054047	-0.278756022349523	NA	-0.858514675610417	0.215783845977207	0	NA
ENSRNOG00000020130	Arhgef1	-0.35414023021742	0.00368360092787616	0.0685966934123148	0.743194245550065	0.132142713160781	0.363984623857189	0.385698326714562	0.00412065657428581
ENSRNOG00000020233	Rabac1	0.235355598375023	0.0170700844488494	0.0323729659275532	0.856584628391353	0.0113048576927517	0.943139227088713	-0.034483859273544	0.835932073236037
ENSRNOG00000061682	AABR07071886.1	NA	NA	NA	NA	NA	NA	NA	NA
ENSRNOG00000020263	Atp1a3	-0.322615942644799	0.000314740693882858	-0.322239563440678	0.000685426688544492	0.0633695053113542	0.568631905494988	0.402516384886185	7.73915437820886e-06
ENSRNOG00000059450	AC114696.1	-0.0223461440352389	NA	-0.0970468500954248	NA	0.0144625005403199	NA	0.00689181188838308	NA
ENSRNOG00000020310	Grik5	-0.010756962809765	0.933381414855961	-0.0423642935442263	0.778813157785936	1.54316812345982	1.29426026963425e-72	-0.293515426163366	0.00108275117688782
ENSRNOG00000055761	Zfp574	0.646286332440687	1.70920472651937e-08	0.5706799697595	4.32982107111005e-06	1.12061815746389	9.14073679084682e-20	0.203799189616695	0.16540284552776
ENSRNOG00000055650	Pou2f2	0.614647070774149	0.000774741080527959	1.2054159384898	9.5015154513208e-11	1.5445811232784	1.43232821548179e-16	1.09691221818409	7.4375407211324e-09
ENSRNOG00000046112	Dedd2	0.60413552786242	0.000589573974734351	0.0857682570037827	0.78400741831815	0.390924301459778	0.0465422403245468	0.27781966359547	0.224433751877696
ENSRNOG00000057603	RF00026	NA	NA	NA	NA	NA	NA	NA	NA
ENSRNOG00000047526	Zfp526	0.347891425965436	0.00983235633668148	0.168853410664014	0.362642744632319	0.535836621054917	0.000185448685519535	0.127572016906814	0.509460903255051
ENSRNOG00000020417	Gsk3a	1.0247618288952	3.44640112604689e-38	0.442592317263219	2.35137329813883e-07	1.08125361634293	1.12926784977207e-39	0.513644524408164	1.20188222795167e-09
ENSRNOG00000020426	Erf	0.175888383840396	0.213845747620839	0.358697742480677	0.0130495137071094	0.979176581477402	2.43359328772674e-13	-0.222699110044657	0.144577626362241
ENSRNOG00000056118	Cic	0.272666500632832	0.0401696490126551	0.489387906758388	0.000199206909650829	0.99310579392147	1.39262631344829e-16	0.424964654755606	0.00123467676221781
ENSRNOG00000020481	Pafah1b3	-1.24664338894701	8.18298574529891e-05	-0.209159241186695	0.721111946607778	-1.30717114385062	7.09131873438523e-05	-0.0642571704422681	0.927864303901271
ENSRNOG00000043154	Prr19	-0.0362948915011334	NA	0.0537101273029751	NA	0.0144625005403199	NA	0.00689181188838315	NA
ENSRNOG00000020489	Tmem145	1.06235482296337	6.45290043706435e-05	1.29942063695629	2.08584771521106e-06	1.16707275258956	9.96832437955223e-06	2.6548493599595	1.34017464413904e-23
ENSRNOG00000052687	Megf8	0.299596493381872	0.000527397912994142	0.0528861679119052	0.71553723587894	0.860287665692044	7.86057643959847e-25	-0.10923545382765	0.32402797397182
ENSRNOG00000020530	Cnfn	NA	NA	NA	NA	NA	NA	NA	NA
ENSRNOG00000020546	Lipe	0.719580642871442	1.802147189594e-06	0.586319219707294	0.000481206672342191	-0.663327767107776	8.65902731804652e-06	0.318431122576488	0.087655541812127
ENSRNOG00000020538	AC121639.1	0.925726398594344	0.0570976111697979	1.36999125162225	0.0118088304911549	1.70461843204194	0.00124093315790215	1.39673502411737	0.0122044593292213
ENSRNOG00000037814	Cxcl17	-0.321712119112358	0.749120567286373	0.808394093561694	0.460343131066337	-0.0591072179588616	0.961121915941615	0.503862998275104	0.653815142200996
ENSRNOG00000020578	Ceacam1	-2.51859816725375	4.89768522507568e-43	-1.40281634717744	5.4457290518337e-12	-0.653149302784851	0.00458193885352328	-0.696466030783463	0.00399120284446753
ENSRNOG00000057198	AC134759.1	0.284911607341156	0.748991897649045	1.30923985295269	0.127918374848325	0.764135204704978	0.343782768922196	0.801185053919664	0.379840323481851
ENSRNOG00000037798	Erich4	0.241238307156815	NA	-0.345002842522445	NA	-0.158604375297481	0.86476876797163	-0.832871626686924	NA
ENSRNOG00000020596	Dmac2	0.579434715789375	4.62898723824506e-08	0.488793031683195	2.95075423443322e-05	0.409482322232588	0.00042955802404974	0.489584445345396	4.86300141134563e-05
ENSRNOG00000020606	B3gnt8	-0.623896261176963	0.507542573237807	-0.220111940447072	NA	-0.254634115859944	0.795585585289198	-0.0386069436063081	NA
ENSRNOG00000020607	Bckdha	0.0264674745164091	0.897647832547032	0.0419363955673993	0.878663302095059	-0.513683513828175	0.000361649808084624	-0.209263277624455	0.254720051289023
ENSRNOG00000020635	Exosc5	-0.121185877211649	0.650228058197002	-0.350266956055944	0.189211176055494	-0.537901920229497	0.0147612838761204	-0.55883304737834	0.0174662561238844
ENSRNOG00000021302	Tmem91	-1.55267385048057	5.64015957425698e-10	-0.755971153710673	0.0126857025049642	-1.32371746955606	4.22129605274741e-07	-3.35878563232791	1.30580675791393e-43
ENSRNOG00000028753	B9d2	-0.12597526459353	0.655683082305439	-0.15202985371748	0.673675356086081	0.11840208872698	0.696655608279804	-0.738961373914209	0.00141545759069336
ENSRNOG00000020652	Tgfb1	-0.103813277492947	0.667608524624411	0.440746790432746	0.0519653327695264	-0.448739850544006	0.0218384176248271	0.217575000183341	0.405454126166235
ENSRNOG00000020675	Ccdc97	0.030768280917079	0.858660954233563	0.15879920387584	0.356197638086116	0.131194872905686	0.382119773259766	0.254741169602407	0.088344870408453
ENSRNOG00000020683	Hnrnpul1	-0.41511155502366	1.18074615346048e-09	-0.120880398608363	0.193081110105869	-0.01367892921487	0.900283470824383	-0.0834584655458108	0.39331825904391
ENSRNOG00000020716	Axl	-0.0892978527982824	0.534978078309916	0.235650648382596	0.0954298015359742	-0.0158173173412623	0.930809066660303	0.0847640352222377	0.62228637978267
ENSRNOG00000041518	AABR07002711.1	NA	NA	NA	NA	NA	NA	NA	NA
ENSRNOG00000020743	Cyp2s1	-0.522427379333393	0.163257225567334	0.109897898315704	0.868942702378376	-0.711741038696218	0.0516031857779897	-1.49743519405261	9.92267835199781e-06
ENSRNOG00000028852	LOC100359930	NA	NA	NA	NA	NA	NA	NA	NA
ENSRNOG00000059739	RF00019	NA	NA	NA	NA	NA	NA	NA	NA
ENSRNOG00000046375	LOC100910953	NA	NA	NA	NA	NA	NA	NA	NA
ENSRNOG00000022679	RGD1564380	NA	NA	NA	NA	NA	NA	NA	NA
ENSRNOG00000049059	LOC681077	NA	NA	NA	NA	NA	NA	NA	NA
ENSRNOG00000047176	LOC102553892	NA	NA	NA	NA	NA	NA	NA	NA
ENSRNOG00000022669	Cd177	-0.137034308260318	NA	0	NA	-0.296361345445446	NA	-0.201340613632644	NA
ENSRNOG00000046222	LOC103689942	NA	NA	NA	NA	NA	NA	NA	NA
ENSRNOG00000045673	LOC103689938	NA	NA	NA	NA	NA	NA	NA	NA
ENSRNOG00000020775	Cyp2b2	NA	NA	NA	NA	NA	NA	NA	NA
ENSRNOG00000033164	Cyp2b3	NA	NA	NA	NA	NA	NA	NA	NA
ENSRNOG00000043320	LOC103691092	NA	NA	NA	NA	NA	NA	NA	NA
ENSRNOG00000032004	Cyp2b21	-0.45821289863765	NA	0	NA	0	NA	0	NA
ENSRNOG00000050758	AC142154.1	0.0692588441579005	0.931178898581148	-0.420200803912992	0.619065647481348	0.989461159442177	0.135291840533445	-0.0908371823416445	0.933361888678554
ENSRNOG00000031529	Cyp2b12	NA	NA	NA	NA	NA	NA	NA	NA
ENSRNOG00000060459	LOC103691072	NA	NA	NA	NA	NA	NA	NA	NA
ENSRNOG00000020827	Cyp2g1	-0.70360708836497	0.158835957289856	0	1	0	1	0	1
ENSRNOG00000020817	Cyp2a3	-2.86156104406611	8.90190423421288e-05	0.0737737112330683	0.963745951897662	0.162687557616924	0.876120596327949	0.0819669953805774	0.957449847996578
ENSRNOG00000055096	AABR07002768.1	-0.741332600584202	9.38997390734425e-05	-0.172191478628746	0.559517786424723	0.405246080941824	0.0542017677726451	-0.200382309565455	0.445714085278497
ENSRNOG00000032805	Cyp2f4	-0.664286853379742	0.187910088548024	0	1	-0.0353478446210795	0.960619198819032	-0.00677960371468118	0.998253540113472
ENSRNOG00000028891	Cyp2t1	0.445485908550914	0.268936751693835	0.687808687331982	0.120818860440126	-0.147412985152697	0.752856366163319	0.892058965358596	0.0339381896001798
ENSRNOG00000020947	Egln2	0.405807705665743	4.70886585400254e-05	0.244060496872665	0.0410666510982683	0.454625749978468	1.54634912876889e-05	-0.102523375027137	0.466098056358993
ENSRNOG00000001500	Rab4b	0.36864971054955	0.00210380324364859	0.101879349356874	0.583301840193191	-0.410525104037659	0.00059484849213424	0.391253796229171	0.00366877298374387
ENSRNOG00000001499	Mia	-3.31496113253602	8.00194185227541e-10	-0.464368536542438	0.633881638177412	-0.38498744286535	0.631733868466831	-0.803114269870705	0.308006096991897
ENSRNOG00000001501	Snrpa	-0.395877570758381	0.0353239642674475	-0.0634994085230626	0.852766995960388	0.25675399252441	0.243736862517738	-0.246790358601992	0.303350172359304
ENSRNOG00000037715	RGD1560854	-0.0216755622805053	0.95278397396077	0.320267106776713	0.32605811533693	0.236719536760861	0.41304917073956	0.22149358811454	0.513708744097961
ENSRNOG00000041608	AC123095.1	-0.174525260437149	0.607135710174761	0.0364555767853181	0.95096647396826	-0.289057209157498	0.37321408939405	-0.349557470128957	0.323587923062947
ENSRNOG00000013945	Itpkc	0.21052418259587	0.283167608923406	0.11646135759377	0.683871079571471	0.29863987432392	0.137662779590729	0.150893421874632	0.55850173988044
ENSRNOG00000020848	Coq8b	0.17734703900274	0.311465976002347	0.405074475261003	0.0198233731125496	0.836743971449972	7.6332462138304e-08	-0.0712744980716071	0.770488269612612
ENSRNOG00000020867	Numbl	0.796788643811609	1.40975281145934e-17	0.0655982554477366	0.684140930476898	2.17183506568692	6.54570766927863e-89	0.298154234889213	0.00579366881180399
ENSRNOG00000061318	AC123095.2	NA	NA	NA	NA	NA	NA	NA	NA
ENSRNOG00000020871	Ltbp4	-0.0296641965334286	0.902056271818767	0.0572384820134705	0.852060186815695	1.05818786936845	1.44242138888772e-10	1.03285319195582	1.0629204529944e-09
ENSRNOG00000020882	Shkbp1	0.730715229588793	2.08723263017439e-05	0.0807006903432902	0.795095654425218	0.678849465869469	0.000284226667834063	0.00496419589669307	0.993636125353612
ENSRNOG00000055371	Sptbn4	0.585603956088226	8.19594562518032e-09	0.0965774120530516	0.542327631445283	1.51532716807924	5.33197218441863e-50	0.0561347813965362	0.731607564194422
ENSRNOG00000024410	Blvrb	0.643784638191762	0.000178197962416232	-0.22331714114501	0.338796472932941	-0.220894210780414	0.265742100213448	-0.0107000903294018	0.980224378817286
ENSRNOG00000037690	Sertad3	-0.458111840387948	0.365718961149072	-0.0466229200539902	0.963163406103972	-1.04763792584475	0.0209279877538936	-0.374598358798729	0.567536203307457
ENSRNOG00000024363	Sertad1	0.474790931090787	0.17184038393789	0.970017901188891	0.00789702571001425	0.78302892118895	0.0258464328767871	0.503022153750282	0.216851466119064
ENSRNOG00000018369	Prx	0.290415253835872	0.684625655348827	-0.240630582827999	0.802076962609873	-2.66130990635643	1.95526624794861e-07	0.165981105821865	0.858719480966703
ENSRNOG00000020835	Hipk4	-0.280805604980429	0.733537979552521	1.02893009999162	0.230342974460833	-0.0485030533849349	0.96237909597542	-0.399751508419868	0.672472413480365
ENSRNOG00000018390	Pld3	1.47402885375652	3.07500581773417e-57	0.130416728872282	0.330723759651057	1.1102235254722	4.39268299555693e-32	0.655449456158605	1.39186021744305e-11
ENSRNOG00000018408	RGD1307554	0.194951487857364	0.141452102107289	0.0488313033686221	0.827651023047027	0.514257474755039	0.000101929818584504	0.43828129524284	0.00186718970611249
ENSRNOG00000018677	Akt2	0.719655539327579	1.97983344479976e-16	0.568959526949069	1.12304083984189e-09	1.13112680897922	1.92160445977405e-33	0.662686100704034	2.41568214049715e-12
ENSRNOG00000018850	Ttc9b	1.90982593148365	4.16919972851648e-17	1.08696772784573	8.78636649326817e-06	2.45966701329358	6.41553842885303e-24	1.16416543624327	1.63802096342221e-06
ENSRNOG00000023521	Map3k10	1.60727745822324	9.89629370427325e-72	0.510046531489638	1.12802875365695e-07	2.07676070154684	9.24620559567183e-104	0.605330897755767	1.66732598164557e-10
ENSRNOG00000055158	RF00026	NA	NA	NA	NA	NA	NA	NA	NA
ENSRNOG00000046338	LOC100909824	-0.307576167037248	0.223762756262643	0.341354273285138	0.285115924952329	0.25039458647783	0.389790831169781	-0.532252497334466	0.0416344446182534
ENSRNOG00000037673	AABR07071891.2	-0.0403382008014644	0.918649955413376	0.0511150773271222	0.930556071649959	-0.361690209441315	0.262183205234421	-0.558366024575964	0.0843608583212029
ENSRNOG00000018885	LOC100910046	-0.091962408942064	0.850174526316095	-0.336460363912652	0.51759567536879	0.214939751435163	0.649062157259912	0.135485319940476	0.826780463139446
ENSRNOG00000049295	AABR07071891.4	0.385791377082582	0.712508163278307	-0.958351484159774	0.372584004256755	0.432634884401843	0.663695878551158	0.14829350382467	0.919437942490435
ENSRNOG00000045741	AABR07071891.3	0.0656106621681906	0.941594322365408	-0.165040836278628	0.88369628506898	0.444163980838932	0.573154033437785	-0.0929944467969904	0.938415872453849
ENSRNOG00000050995	AABR07002774.4	-0.116311267278607	0.816817386495494	0.0544791049735715	0.944236017824702	0.539602665288236	0.220959267044638	-0.17765582562637	0.765765613122075
ENSRNOG00000048765	AABR07002774.3	-0.233211827029067	0.710058461049625	0.991587480164853	0.11216540790093	1.59202360746186	0.00516533482009415	0.954997250228503	0.127187195317014
ENSRNOG00000029805	AABR07002774.2	-0.73673096698086	6.9780654745405e-05	-0.167861989295066	0.576220216544344	0.290412891072404	0.211145965407961	-0.38510155847765	0.0940475970399767
ENSRNOG00000018928	AABR07002774.1	-0.492849613748114	0.255022484804251	-0.343145728136003	0.552616041449137	0.110903119209399	0.838398320474403	-0.00487503387218605	0.999406535612547
ENSRNOG00000048489	AABR07002775.1	NA	NA	NA	NA	NA	NA	NA	NA
ENSRNOG00000054614	AABR07002779.1	-0.495310188242323	0.513430793673705	0.75526247932507	0.410528928035214	-1.14399793216106	0.080789863606355	0.171844564358797	0.880107375502256
ENSRNOG00000058145	RF00100	NA	NA	NA	NA	NA	NA	NA	NA
ENSRNOG00000054568	AABR07002782.1	-0.0434972625399349	NA	0	NA	0	NA	0	NA
ENSRNOG00000054618	AABR07002783.1	NA	NA	NA	NA	NA	NA	NA	NA
ENSRNOG00000018936	Zfp780b-ps1	-0.363725798172241	0.133201058044308	-0.481394909915834	0.0681477383477938	-0.202763585669222	0.463191937574561	-0.568167460556784	0.0226045074882551
ENSRNOG00000053366	AABR07002784.1	0.20469634244399	0.282343162471338	-0.440921277392015	0.0172724238776353	0.000800736589984044	1	-0.404456761492366	0.0321408621893484
ENSRNOG00000056883	RF00066	NA	NA	NA	NA	NA	NA	NA	NA
ENSRNOG00000060634	AABR07002784.2	-0.0572730934794854	0.957344346072663	-0.459169978309614	0.67608616227649	0.0370988165265226	0.975424658320048	-0.0295115247845221	0.987344799981827
ENSRNOG00000018994	Psmc4	0.0792559535921674	0.57792808539276	0.121519778234584	0.457713288079413	-0.167083574306306	0.186253260893202	0.18291555851895	0.194239457678437
ENSRNOG00000059438	RF00004	-0.0434972625399348	NA	0	NA	0	NA	0	NA
ENSRNOG00000019129	Fcgbp	-0.0161435310038348	0.986610414483984	-1.45994133350932	0.00888918914168548	-1.01988808957399	0.0603391613375453	0.329095807643108	0.687478916557944
ENSRNOG00000061255	RF00026	NA	NA	NA	NA	NA	NA	NA	NA
ENSRNOG00000042899	Fcgbpl1	-0.167006411759295	NA	0	NA	-0.139429091147667	NA	0	NA
ENSRNOG00000019229	Fbl	0.0824140862908031	0.758032200967062	-0.483664564958372	0.0342944048455499	0.330880937427177	0.169753091617991	-0.533199226879444	0.0168401989522208
ENSRNOG00000019254	Dyrk1b	-0.14378186916253	0.302352454206643	0.308789128028353	0.0306547640488867	1.10772452239307	1.5456635304847e-17	-0.130585830971348	0.435397777927645
ENSRNOG00000047901	Acp7	-0.234031688101283	NA	-0.245878644546856	NA	-0.971263585037326	0.142448436139426	0	NA
ENSRNOG00000019883	Pak4	-0.285862215331556	0.187938859777435	-0.105332555865069	0.760385192783822	-0.290297917341804	0.199816073245967	-0.0508312845783467	0.891185946639023
ENSRNOG00000055129	AC110862.1	NA	NA	NA	NA	NA	NA	NA	NA
ENSRNOG00000054506	Nccrp1	1.32768927587305	0.0312757935818901	0.435983846229165	0.633881638177412	-1.5974587557002	0.0031727929996963	-0.301523481955215	0.732292039531971
ENSRNOG00000019879	Sycn	0.116231392283746	0.914685573838963	-0.492786580495036	NA	-0.113083427805512	0.917471507343846	0.127894931857272	NA
ENSRNOG00000026584	Ifnl3	NA	NA	NA	NA	NA	NA	NA	NA
ENSRNOG00000056251	Ifnl1	NA	NA	NA	NA	NA	NA	NA	NA
ENSRNOG00000019869	Lrfn1	1.67368820397371	1.53029028244579e-34	0.379105738267205	0.016675529859831	1.50091992573423	2.75722795704666e-23	1.79303977015927	2.9189693470746e-29
ENSRNOG00000019838	Gmfg	-0.365144698218144	0.465196825671436	0.0739955410351503	0.933208186417463	-0.41248475361442	0.409564070140534	0.189751866037858	0.789676042357787
ENSRNOG00000019831	Samd4b	0.213959061756422	0.146501517985545	0.144596532616046	0.450085499678542	0.103184407553904	0.53040331159007	0.382423330740728	0.00868093825133944
ENSRNOG00000019746	Paf1	-0.159081444517585	0.170693233977555	0.179570480830075	0.180959284474193	0.0613957734329644	0.652599410668705	0.151274035536903	0.259823664374799
ENSRNOG00000019702	Med29	0.379931082919761	0.0127016879051754	0.315734832408772	0.0830206692867177	0.256829987176531	0.132337061336922	0.318370607623652	0.0798758580978205
ENSRNOG00000058388	Zfp36	0.789099935014605	0.0102224419402529	1.19352464603356	0.000179035434570231	0.332239917752776	0.340319888102711	0.806569479930316	0.0153061951952151
ENSRNOG00000030266	Plekhg2	-0.238506415113791	0.363857908461632	0.878565947011826	0.000250236740826618	0.794917716938457	0.000572873438614063	0.340740379328473	0.224190318502706
ENSRNOG00000019578	Rps16	0.0728461181761437	0.538110516352965	0.0845803948016926	0.555789800512233	-0.127468661278632	0.23191151690433	-0.390776017478961	4.69547822400798e-05
ENSRNOG00000055387	RF00561	NA	NA	NA	NA	NA	NA	NA	NA
ENSRNOG00000062179	AABR07002792.1	NA	NA	NA	NA	NA	NA	NA	NA
ENSRNOG00000062225	AABR07002792.2	0.0320957865391341	NA	0.0537101273029751	NA	0.0144625005403199	NA	-0.0700539839556101	NA
ENSRNOG00000032034	Supt5h	0.156299042085126	0.107699522488707	0.229020983788186	0.023922036843188	0.427955000838017	1.04058444168565e-06	0.277013736599473	0.00367033019426707
ENSRNOG00000037638	Timm50	-0.0451901154237145	0.787502853811107	0.0671752117761735	0.76132826296084	-0.233293927344202	0.0946000814710025	0.117853635876967	0.532583189603281
ENSRNOG00000019338	Dll3	-1.1011148567442	0.18593228966584	-0.109210436972272	0.945609836359035	-1.68852042747631	0.0292951695558126	-0.996530802962772	0.29706344328188
ENSRNOG00000051208	Selenov	0.1695478420044	0.740597130294664	-0.688732313078746	0.137969577323479	2.67650340951348	2.65489733674902e-06	-0.176313935551096	0.789036059072535
ENSRNOG00000045545	Eid2b	-0.506228111183763	0.135147823649283	-0.0914914648307205	0.881512027638461	0.250983629132293	0.562192474630963	0.233247356301532	0.653853284830422
ENSRNOG00000019310	Eid2	0.199261667041384	0.343825590560092	-0.225637655221964	0.366866909552879	-0.0809783278837599	0.74750997854409	0.177310709901571	0.518859226770175
ENSRNOG00000056831	AABR07002805.1	0	NA	-0.0998606168670692	NA	-0.373116133907452	NA	0	NA
ENSRNOG00000043056	Fpr-rs4	NA	NA	NA	NA	NA	NA	NA	NA
ENSRNOG00000011191	Vom2r10	NA	NA	NA	NA	NA	NA	NA	NA
ENSRNOG00000048014	Fpr-rs6	NA	NA	NA	NA	NA	NA	NA	NA
ENSRNOG00000034119	Vom1r2	NA	NA	NA	NA	NA	NA	NA	NA
ENSRNOG00000048251	Vom1r3	NA	NA	NA	NA	NA	NA	NA	NA
ENSRNOG00000045921	Vom1r4	NA	NA	NA	NA	NA	NA	NA	NA
ENSRNOG00000033775	Vom2r11	NA	NA	NA	NA	NA	NA	NA	NA
ENSRNOG00000031073	AABR07002835.1	NA	NA	NA	NA	NA	NA	NA	NA
ENSRNOG00000058623	RF00019	NA	NA	NA	NA	NA	NA	NA	NA
ENSRNOG00000055006	AABR07002845.1	NA	NA	NA	NA	NA	NA	NA	NA
ENSRNOG00000055681	AABR07002848.2	NA	NA	NA	NA	NA	NA	NA	NA
ENSRNOG00000050453	AABR07002848.1	0.00328055963016112	1	0.330953274848324	0.73921947687634	0.364055902263113	0.631731499474841	0.665844499139252	0.411992810432422
ENSRNOG00000019942	Fbxo17	-0.359568750353645	0.666035857498193	0.222064915770358	0.854218250658387	1.04876229349638	0.171408435090238	0.857407170636339	0.331757579298437
ENSRNOG00000019949	Mrps12	0.540243167844001	0.0213973511510398	0.217007170773575	0.525381141070511	-0.167975746172846	0.555768034115703	0.249760824896557	0.436457418317315
ENSRNOG00000019962	Sars2	-0.353410083428121	0.0227145132732731	0.0747236724856071	0.793480378226937	0.497891346689828	0.00638587584195613	0.0164273496456382	0.963586932454594
ENSRNOG00000046971	Ccer2	-1.26357975797875	0.00750384112086575	0.284794795902441	0.738538795620171	-0.534503594275302	0.347965199540858	-0.368514737887832	0.607247062297996
ENSRNOG00000020063	Nfkbib	0.41944463354308	0.027920297175857	0.325245582655146	0.169249704074725	0.264412720651007	0.22320167981024	0.493023566228091	0.0251383032663834
ENSRNOG00000020102	Sirt2	0.650438033580067	4.73221267206251e-13	0.0911577016742205	0.515065158834458	-1.27647502205056	1.02357342179998e-48	0.0170660962079031	0.924604543509305
ENSRNOG00000025354	Rinl	0.683320764049868	0.411383890611624	0.255299396782191	0.841605082935598	0.130273492725595	0.898754477769086	-1.27343423669187	0.107067030063838
ENSRNOG00000020235	Hnrnpl	-0.117708627899998	0.0814638608366103	0.0753185162879608	0.398090345442177	0.315316896694662	5.96847997148441e-07	-0.270375335686682	2.82997716504509e-05
ENSRNOG00000020308	Ech1	0.163394183388756	0.248362735632853	-0.184218368310745	0.267488563311277	-1.57245976668112	9.62010576017077e-45	-0.233789085532081	0.124840309290688
ENSRNOG00000020338	Lgals4	0.0382450228321147	NA	-0.101095897899212	NA	0.0145945109403914	NA	0.00695471877243581	NA
ENSRNOG00000020380	Lgals7	1.37945965897997	0.102429937582446	0.828498853729902	0.455352037955993	1.91795815369436	0.0154232575141544	0.850988176536912	0.403332064215001
ENSRNOG00000020389	Capn12	0.0163699421980087	0.980577735217601	0.0361362940922298	0.968883731023862	1.21177727286489	0.0127306826597895	0.418117428449838	0.48445346217228
ENSRNOG00000020433	Actn4	0.0545300255674176	0.66332428838658	0.870370232474285	3.88974455865672e-21	0.611353092919353	2.88299567650744e-11	0.42119542207345	1.36349855655943e-05
ENSRNOG00000047624	AABR07002854.1	NA	NA	NA	NA	NA	NA	NA	NA
ENSRNOG00000020598	LOC100909725	-0.247278229788166	NA	0	NA	0	NA	-0.223945575643596	NA
ENSRNOG00000020616	LOC103689986	-0.073746588691966	0.951915800910729	-0.578032102298324	NA	-0.484472632936575	0.620334547629559	0.259196254747549	0.839232561615985
ENSRNOG00000020628	LOC103690068	NA	NA	NA	NA	NA	NA	NA	NA
ENSRNOG00000020636	Spint2	-0.561251111725295	0.00721488423262641	-1.19072263739596	3.82158012153115e-09	-0.539570300467171	0.0166012891405432	-0.756049811203386	0.000748194983047001
ENSRNOG00000020676	Ppp1r14a	1.72933697053185	3.98162633272504e-15	-0.101374213655949	0.779258420266258	-2.56530748325622	4.359038486134e-49	0.0688702641808061	0.85354484094264
ENSRNOG00000020687	Dpf1	-0.943989360360179	4.49007095443e-25	-0.323648456822349	0.00313720170776428	2.19512345095023	6.20540090567884e-67	-1.15825262917402	6.75844357901906e-35
ENSRNOG00000020703	Sipa1l3	-0.0783035265807872	0.691748631027252	-1.90247132224565	5.86746108238981e-43	0.526168805616863	0.000571989333935632	-0.333589934816627	0.0479658806215999
ENSRNOG00000057222	AABR07002868.2	0.0944011071815785	0.932984585699674	0.371822796479253	0.778071317083578	0.960697329003993	0.267926678656076	0.576731769464332	0.59682196873737
ENSRNOG00000055519	AABR07002868.1	-1.60606831698545	0.0511500772667672	-0.869284781837943	0.432308265965407	-1.07024076149561	0.219497537892812	-0.376493132249582	0.758171999905292
ENSRNOG00000045327	RF00001	NA	NA	NA	NA	NA	NA	NA	NA
ENSRNOG00000029043	Zfp84	-0.210285842831292	0.0473115543235821	-0.102160968632898	0.495494325071304	0.328089678974257	0.00236102746052881	-0.00389351481884083	0.989660013981879
ENSRNOG00000051494	AABR07002870.2	0.187340124992045	NA	0.130655923146968	NA	0.0144625005403199	NA	0.0838376077323762	NA
ENSRNOG00000048116	AABR07002870.1	-0.0448500093048591	NA	-0.100181464385011	NA	0	NA	-0.146999779799603	NA
ENSRNOG00000020774	LOC103690114	-0.323195599228508	0.683117926869284	-0.109455936530382	0.931653747828282	-0.750724511891512	0.281748076076904	-0.0111915242755983	0.997558027846281
ENSRNOG00000046937	LOC103690038	0	NA	0	NA	-0.139429091147666	NA	0	NA
ENSRNOG00000020495	Eif3k	0.0756564853086933	0.574007860995751	0.0470211975133815	0.807547388857978	-0.0406757796616012	0.78182815888674	-0.0214976412542359	0.917650703584623
ENSRNOG00000056770	RF00411	-0.663501679487279	0.0662819129911359	-0.41007834734164	0.403654969405148	-0.00597491733056947	0.995886499232868	-0.391030245091917	0.416071087030573
ENSRNOG00000020505	Map4k1	-0.00806969674073398	0.988196278072846	0.310079534627134	0.492615925742337	-0.386597186264525	0.258874281600607	-0.00918277657126101	0.993007817221898
ENSRNOG00000020557	Ryr1	-3.98972458987402	7.17668421274027e-115	-2.47691905537163	1.71199066028068e-42	0.122029602478532	0.658265116745225	-1.00020658059759	6.94843871953798e-07
ENSRNOG00000033744	Rasgrp4	1.10591307227547	0.00325570516337644	0.738588856880669	0.107987986796444	1.02072053241443	0.014636429969323	0.561418122463284	0.246059968154871
ENSRNOG00000024036	Fam98c	0.268345240223207	0.0813354884258248	0.618541713064859	5.5722334731493e-05	1.04319111851906	4.33134995548759e-12	0.02977895808419	0.914005890372678
ENSRNOG00000051915	Spred3	0.36851308473718	0.0490874432759709	-0.133299682348076	0.63613084883403	1.05875572739786	1.26288287985119e-07	-0.109567410125124	0.694746278547764
ENSRNOG00000023931	Ggn	0.403720010109209	0.529447265553529	0.348219338282659	0.687418222181946	-0.141728498959889	0.847877423554742	0.461347443564549	0.553431944962855
ENSRNOG00000037580	Psmd8	0.0106952585438373	0.932181874163166	-0.0608005889069332	0.65971589117557	-0.226605733803737	0.0112253705318912	0.0276049101383562	0.855232686079138
ENSRNOG00000060693	Catsperg	0.800558910324719	0.042246751782886	0.23385527886767	0.704272127527166	1.36829845253075	0.000343283798627355	1.22655356711575	0.00240189211361922
ENSRNOG00000049868	Kcnk6	NA	NA	NA	NA	NA	NA	NA	NA
ENSRNOG00000055286	Yif1b	-0.120443058383928	NA	0	NA	0	NA	0	NA
ENSRNOG00000056651	LOC100361913	NA	NA	NA	NA	NA	NA	NA	NA
ENSRNOG00000046305	LOC103690163	-0.0434972625399347	NA	0	NA	0	NA	0	NA
ENSRNOG00000048894	Zfp74	0	NA	-0.177127260229004	NA	0	NA	0	NA
ENSRNOG00000055119	AABR07002882.1	0.998448417782624	0.247804370700183	0.515234489792875	0.674037940311489	0.868706478561246	0.323582877734087	0.783721358563919	0.442335082789603
ENSRNOG00000046652	Zfp84	NA	NA	NA	NA	NA	NA	NA	NA
ENSRNOG00000030932	Zfp14	-0.417742365218773	0.465195221344342	-0.373342283880901	0.624465112639509	-0.989315627259276	0.0500232923634543	-1.14529964921368	0.0302348057972088
ENSRNOG00000052023	AABR07002885.1	-0.259509699846823	NA	-0.100181464385011	NA	0	NA	0	NA
ENSRNOG00000055611	RF00392	-0.0434972625399348	NA	0	NA	0	NA	-0.146999779799603	NA
ENSRNOG00000048138	Zfp566	-1.08731379912032	0.0578254150336299	-0.592842197889234	0.456796034191166	-0.440381524985054	0.526979175981876	-0.967148460908687	0.141688604093693
ENSRNOG00000052127	RF00392	0.234922555265978	NA	-0.0052457436808579	NA	0.15680536467012	NA	0.149234676018184	NA
ENSRNOG00000046867	Zfp260	NA	NA	NA	NA	NA	NA	NA	NA
ENSRNOG00000020762	Zfp260	-0.00222174846428518	1	-0.376321984764328	0.449203800840299	-0.0808233569079085	0.876888542613852	-0.264726330450603	0.611713621988429
ENSRNOG00000056062	AABR07002893.1	0	NA	0	NA	0	NA	-0.146999779799603	NA
ENSRNOG00000037556	Zfp420	0	NA	-0.177127260229004	NA	0	NA	0	NA
ENSRNOG00000047627	AABR07002896.1	NA	NA	NA	NA	NA	NA	NA	NA
ENSRNOG00000020777	Zfp382	-0.0908460642165081	0.488694055341977	-0.410976335533123	0.00027278481123539	0.97918302046704	1.00311887297378e-16	-0.227447155366839	0.0761200333503396
ENSRNOG00000054776	AABR07002898.1	-0.10984742470679	NA	-0.0253373741231007	NA	0.0157706582144925	NA	0.00751518794880967	NA
ENSRNOG00000047364	Cox7a1	-0.759549793297901	NA	-0.495368662787054	NA	0	1	-0.292894156841316	NA
ENSRNOG00000056429	AABR07002902.1	-1.49800138222997	0.0715821736845294	-0.797797289142705	NA	-1.89650000887005	0.0177631828110896	-0.342305048461859	0.783633211095152
ENSRNOG00000048194	LOC100912380	0.807096726447319	0.000203761686782822	0.385726013682627	0.16449290815979	-0.830587760547044	8.09986925948362e-05	0.700286865332331	0.0046814813801605
ENSRNOG00000056353	RF00026	NA	NA	NA	NA	NA	NA	NA	NA
ENSRNOG00000045655	Tbcb	0.408131272947057	0.637474702067555	0.360104362630996	0.758920065847405	0.136070899827729	0.891375547492664	0.295641304858345	0.793335145458976
ENSRNOG00000020799	Polr2i	0.0383605321468974	NA	-0.474614310274437	NA	0.0290390581451416	NA	-0.137987892477245	NA
ENSRNOG00000047959	LOC100912425	NA	NA	NA	NA	NA	NA	NA	NA
ENSRNOG00000020807	NEWGENE_1306714	0.627397054641876	0.493872834626747	1.39799866050789	0.138839968623072	-0.406466096401837	0.668058704760066	-0.141894130423028	0.919545069511077
ENSRNOG00000020821	LOC108348122	0.064925318599999	0.880208082349706	0.0483603851791081	0.940764231700202	0.104818936123997	0.811187781635179	0.789922978727272	0.0448373282053324
ENSRNOG00000025216	LOC108348106	-0.358385077852806	NA	-0.393645531269166	NA	-0.337097099662562	NA	-0.709506704627845	NA
ENSRNOG00000052697	RF00100	-0.304841774048182	0.771137267757387	-0.202272917251683	NA	-0.0138524923046224	0.99481729408272	-1.0972401055391	0.245565381492881
ENSRNOG00000049277	Syne4	0	NA	-0.254073056072998	NA	0	NA	0	NA
ENSRNOG00000047045	LOC108348111	-0.743513630077672	0.432338218503327	-0.301701051807902	NA	0.102619644322727	0.931079011405009	0.276466291757149	0.827892388632152
ENSRNOG00000048447	AABR07002906.1	NA	NA	NA	NA	NA	NA	NA	NA
ENSRNOG00000020839	Lrfn3	0.239801875936706	0.278375435392591	0.0825617742555229	0.814265118963094	0.648700173941233	0.0020610211638447	0.231469161895074	0.384581041113546
ENSRNOG00000057115	RF00004	0.032972475792496	0.978988879627524	-0.179486496190741	0.901333270731275	0.68109093633429	0.459327370050231	-0.254247576100671	0.841475524320689
ENSRNOG00000048484	AABR07002908.1	0.0320957865391341	NA	0.0537101273029751	NA	-0.0624832953036733	NA	0.00689181188838311	NA
ENSRNOG00000020845	Tyrobp	0.144760333428898	0.709781693375969	0.190572200177156	0.700623517620607	-0.96030194543224	0.000931398953283588	0.477853755623208	0.216039329139715
ENSRNOG00000020849	Hcst	-0.692362677899327	NA	0.523937467405185	NA	0.197718387600351	0.84023924223028	0.174266242227119	NA
ENSRNOG00000025111	Nfkbid	-0.309434162461753	0.380494837111512	0.590919384630313	0.147340836343157	1.5045734996574	9.18101232842099e-05	0.768846318375319	0.0562444439027151
ENSRNOG00000020851	Aplp1	0.932807974228351	1.68748491201037e-69	0.0725767445369766	0.352442400105309	-0.887798766715865	6.58536304276201e-64	0.00571793658896897	0.962251968571259
ENSRNOG00000020864	Kirrel2	-1.5637891620908	8.97487579723537e-05	-1.15451192921296	0.0124824633088878	1.37145181126965	0.0102018736849465	0.368148419218561	0.584146084974007
ENSRNOG00000020873	Nphs1	-4.84112756067844	2.65761889803525e-22	-0.815535246167846	0.30272869750826	0.496858898640405	0.54936726698584	0.261874415672895	0.811440807227073
ENSRNOG00000057578	Prodh2	0.530173629670826	0.599038276660446	-0.118542534490342	NA	1.11813523481613	0.187232515164898	0.108015962242404	0.943865627251075
ENSRNOG00000061774	RGD1560986	0.0379106326049785	NA	-0.100181464385011	NA	0.0144625005403199	NA	0.00689181188838307	NA
ENSRNOG00000024677	Arhgap33	-0.0489761513131297	0.82437967948415	0.113038527320056	0.658668663917402	2.93019116243032	5.38545152876867e-73	-1.00181102916493	7.7683898311565e-11
ENSRNOG00000024625	Proser3	-0.238197192028177	0.343099844935366	0.137733372675335	0.703426812419587	-0.382640755656095	0.101834214909224	0.116394996503691	0.735493078885035
ENSRNOG00000060188	AC141526.2	1.20017114573791	0.139782144832487	0.751838538681719	0.482851745492721	1.05064891796869	0.208478702809838	0.667877543862413	0.515882612363327
ENSRNOG00000020922	Hspb6	1.18805234200797	1.16532704726766e-10	0.759832794979806	0.000168654136976395	0.432549973457242	0.03209618617261	0.869767133854768	1.0688219875055e-05
ENSRNOG00000020929	Lin37	0.121961429697112	0.590871088932368	0.264758350357616	0.28501117538638	0.157701974118081	0.496228942197901	0.0827301799095653	0.789344793470732
ENSRNOG00000020941	Psenen	0.383132020952337	0.00761912086406369	0.104553152179118	0.643815837276036	-0.508013763062047	0.000270316661057138	-0.125271404534083	0.53215636753271
ENSRNOG00000024497	U2af1l4	0.032836899530802	0.838423855023941	0.0114616411736302	0.966329370321446	-0.0808833151828988	0.602875210915816	-0.19864976881793	0.182563859422357
ENSRNOG00000020957	Igflr1	-1.03811051984659	0.0159776481952592	-0.066477798344573	0.943838787286945	0.172541774020959	0.788375903796908	-0.785284906928907	0.135454085362086
ENSRNOG00000055525	Kmt2b	-0.268712054652143	0.021378676862271	0.0766326351930942	0.677664904391034	0.967385948105981	3.97037543518658e-18	-0.0516334636299848	0.776505518386777
ENSRNOG00000050364	Mir3569	-0.241347020618029	NA	-0.165957961954185	NA	0	NA	0	NA
ENSRNOG00000042465	Zbtb32	-0.0434972625399348	NA	-0.100181464385011	NA	0	NA	0	NA
ENSRNOG00000024331	Upk1a	-0.28201538312264	0.794045968182258	0.369315241792762	0.78994798578244	0.95297562882516	0.278691805375653	0.89944248083429	0.369141030555074
ENSRNOG00000024309	Cox6b1	0.285167352594837	0.0138154194657022	0.0236217161174993	0.916709317603165	-0.138982240038936	0.283045602643532	-0.111986716692298	0.467131048874159
ENSRNOG00000024288	Etv2	0.111519913411125	NA	0.130655923146968	NA	0.0914082963843131	NA	0.0838376077323762	NA
ENSRNOG00000024278	Rbm42	0.0571597733014013	0.722504575082287	-0.231477939093865	0.122606878419218	-0.372646282234902	0.00305207706420722	-0.110033186839617	0.538698632773625
ENSRNOG00000024266	Haus5	-0.484023168476829	0.00845267739246939	0.255179451055403	0.345520750980075	-0.608523002592995	0.00147987142210586	-0.274298805370167	0.26977659340918
ENSRNOG00000046724	AC141526.1	NA	NA	NA	NA	NA	NA	NA	NA
ENSRNOG00000037485	LOC688924	NA	NA	NA	NA	NA	NA	NA	NA
ENSRNOG00000020985	Atp4a	0.0471860362157378	NA	-0.287342680491724	NA	0.260512250027784	NA	0.245644960240875	NA
ENSRNOG00000021006	Tmem147	0.21209929915063	0.17470745394756	0.0989010040189186	0.673675356086081	0.0539569699026991	0.787611126373262	0.00528713931128631	0.990512996979944
ENSRNOG00000021009	Gapdhs	-0.108986470272859	0.919582562402509	-0.0936132248547891	0.953116962678443	0.0547392981151874	0.963800008220803	-1.35113475823011	0.109365862025838
ENSRNOG00000021015	Sbsn	0.0118875852123978	0.972541335183625	-0.0201768499383118	0.966735739505498	0.59708553682305	0.0147136907934291	-0.306365825973612	0.264253687402623
ENSRNOG00000055934	Dmkn	0.100507014577992	0.894092164882519	1.44570692464139	0.0220465402974695	1.67586923480922	0.00445192987447488	-3.04900965350104	8.85468919733025e-10
ENSRNOG00000062262	Krtdap	NA	NA	NA	NA	NA	NA	NA	NA
ENSRNOG00000002340	LOC100361079	NA	NA	NA	NA	NA	NA	NA	NA
ENSRNOG00000021021	Ffar2	-0.125826770328547	0.898661669346926	0	NA	0	1	-2.05167506577942	0.00495988199601743
ENSRNOG00000037467	Ffar3	0.430935678917204	NA	0.221595236478418	NA	-0.527020938821281	0.476881296963002	0.283626000752963	NA
ENSRNOG00000024009	Ffar1	NA	NA	NA	NA	NA	NA	NA	NA
ENSRNOG00000024000	Cd22	-1.1290658455272	0.0464542632274932	-0.817985044101567	0.245544604870287	-1.24599319822433	0.0255343665364886	-1.13065389352415	0.0652008758017547
ENSRNOG00000021023	Mag	2.12573385871327	1.60621379785898e-50	0.389173135332069	0.023544756948295	-2.29757619295683	9.35007456618955e-61	0.152466239838276	0.452845840190325
ENSRNOG00000021029	Hamp	-0.411683832990825	NA	-0.0619258790206551	NA	0.0506366650266225	0.960806368729829	-0.587989052673592	NA
ENSRNOG00000053725	Usf2	0.162552592283588	0.161132995707254	0.216383754449144	0.0891808549434155	0.135666287812432	0.265095076303301	0.0106621979184378	0.962643557942376
ENSRNOG00000021053	Lsr	0.854413441384958	0.00388494785158429	0.79972006742319	0.0157651099189946	0.735512223658	0.0171355154460488	0.383899850168791	0.305535553144425
ENSRNOG00000021060	Fam187b	0.793909428422322	0.398718294315516	0.179762414373253	NA	-0.90259122147865	0.314836533990981	0.569001217465484	0.608461087592969
ENSRNOG00000021062	Fxyd5	0.179117899382386	0.566666578930722	0.882035925615704	0.00121756317195905	-0.260960570728677	0.369878674329247	0.916874653849739	0.000755337276745139
ENSRNOG00000021067	Fxyd7	2.30254152540424	2.09563944605038e-50	0.68382674689527	3.73219308948341e-05	0.782340798344144	7.68363001641226e-07	1.96341886205414	9.66049975037086e-33
ENSRNOG00000021079	Fxyd1	-0.0477895651387226	0.807654230557891	-0.0812712244603566	0.743435245046773	-0.939986151459895	4.67106920258056e-12	0.136343274679851	0.516258194660511
ENSRNOG00000021087	Lgi4	-0.226861947220953	0.0303385768658501	0.127062235139954	0.358521438883308	-0.500960969557387	2.30911392927337e-07	0.289706761351678	0.00812492651794226
ENSRNOG00000021095	Fxyd3	-1.31344222495515	0.00581829426144182	-0.310086898375536	0.712366748332318	-1.61352847882351	0.000741489812012951	-0.567128211762401	0.403332064215001
ENSRNOG00000021097	Hpn	0.847243249801276	0.21967668005051	0.713901810772537	0.412195943236329	-0.225427848012475	0.780168081435099	1.4919449121846	0.0432352345504638
ENSRNOG00000021102	Scn1b	2.65564446585867	5.95842853362299e-87	0.895672342971181	2.41319864816461e-10	1.46602638855113	3.21985637217565e-27	2.29277304361289	2.31023278376847e-62
ENSRNOG00000056095	AABR07071898.1	NA	NA	NA	NA	NA	NA	NA	NA
ENSRNOG00000021106	Gramd1a	0.0518994793574088	0.64759241863204	0.0574002721751864	0.693929580363781	0.70340389655609	2.31166162765674e-15	0.218090936412488	0.0312342335428951
ENSRNOG00000055794	AABR07002923.1	NA	NA	NA	NA	NA	NA	NA	NA
ENSRNOG00000028984	RGD1563307	-0.28939202178886	0.755836100826892	-0.0447738592093105	0.978895375333903	0.132334088420886	0.900779961662374	0.206008771086262	0.869408975778948
ENSRNOG00000061315	AABR07002928.2	-0.648324005813723	0.160931169986262	-0.241559684847024	0.742335313974521	-0.283500654371047	0.608303225627973	-0.749772464477297	0.140654312723952
ENSRNOG00000023367	Scgb2b2	NA	NA	NA	NA	NA	NA	NA	NA
ENSRNOG00000023314	Scgb2b24	0	NA	0	NA	-0.139429091147666	NA	0	NA
ENSRNOG00000030828	Apbh	NA	NA	NA	NA	NA	NA	NA	NA
ENSRNOG00000037415	AABR07002938.1	-0.122595089694772	0.905592430074702	-0.568567014410989	0.609948574929117	-0.2583137647587	0.792378695353731	-0.120174856746769	0.932576841108029
ENSRNOG00000023296	AABR07002945.1	-0.0105290771041734	0.985074475488766	0.313528235509897	0.522332603283603	0.315791272395193	0.442123871023846	0.29407528785869	0.544329683501155
ENSRNOG00000061556	RF00614	-0.579049576520762	NA	-0.127766423536733	NA	0.489462000918607	0.59606106641235	0.15748665861556	NA
ENSRNOG00000021113	Uba2	0.0124359110066917	0.910791622133089	0.165431509178551	0.0799561485014774	0.602258015212242	1.32620763346197e-13	-0.032649076738683	0.806014860020594
ENSRNOG00000021119	Pdcd2l	-0.176841595056034	0.667482873975563	0.142077862307719	0.805557007626755	0.393395351779838	0.310428112590358	-0.0481755691817324	0.940682191482117
ENSRNOG00000023150	Gpi	0.385200944419763	5.90727354362973e-11	-0.00986990151140315	0.938838995356255	0.404560619268362	1.21894052207572e-11	-0.156857818732315	0.0208207683020299
ENSRNOG00000021129	RGD1308428	-0.0351019721356399	0.786994508994322	0.351067871318077	0.000769067329462351	-0.126779169983314	0.252703447174141	0.240740664746757	0.0309800382815234
ENSRNOG00000051350	AABR07002945.3	-0.74420708748968	0.415948718405035	-0.440833014545284	0.734706019507311	-0.239833743755765	0.819784939899858	0.381123149610793	0.753304094797401
ENSRNOG00000051284	AABR07002945.2	-0.715020786129892	0.360944906342131	0.209090490747838	0.872225536031914	-0.200388388361126	0.834245650325521	-0.15513460175449	0.902582181390129
ENSRNOG00000021133	Lsm14a	-0.260833549607798	0.00812418056995504	-0.202434231107777	0.0847536844009059	-0.436630219577477	5.86187972167687e-06	-0.408979831643161	4.97556772656577e-05
ENSRNOG00000060969	RF00100	NA	NA	NA	NA	NA	NA	NA	NA
ENSRNOG00000021137	Kctd15	-1.03840995535903	7.98920454251299e-14	-0.498511609307148	0.0024044268793125	-0.218186799130368	0.218512420106335	0.128819019719643	0.580865416094383
ENSRNOG00000022919	Chst8	-0.724602467849205	0.0105816817344394	-1.31029728839028	2.75406075165792e-06	-1.6284526743542	7.40973608128724e-10	1.6682669758426	2.06407008673987e-05
ENSRNOG00000032733	AABR07002966.1	0.392159286489791	NA	0.343707477084676	NA	0.304459850322021	NA	0.296889161670084	NA
ENSRNOG00000060091	RF00416	NA	NA	NA	NA	NA	NA	NA	NA
ENSRNOG00000059099	RF00560	NA	NA	NA	NA	NA	NA	NA	NA
ENSRNOG00000052945	AABR07002969.1	0.138192345557659	0.643288201224527	-0.0124808194309145	0.98293018678443	-0.456291051780515	0.0692570213721874	0.145945529686671	0.70160155535285
ENSRNOG00000056960	RF00416	NA	NA	NA	NA	NA	NA	NA	NA
ENSRNOG00000053019	RF00560	NA	NA	NA	NA	NA	NA	NA	NA
ENSRNOG00000060312	LOC108348197	0.0611261149221927	0.940567599678858	-0.464113775003948	0.575338900050135	-1.8707669037841	0.000243830138985048	-0.710439956038819	0.309538423418856
ENSRNOG00000050148	AABR07002973.1	NA	NA	NA	NA	NA	NA	NA	NA
ENSRNOG00000037541	Sdhaf1	0.122711778469384	NA	0.13969828509604	NA	0.015463413177301	NA	0.0896397939310662	NA
ENSRNOG00000020830	LOC108348128	-0.762088038768996	0.271263469433172	-1.8120083368511	0.00518800267326578	-0.220405536949764	0.801331071052361	-0.668099205279421	0.430598090203592
ENSRNOG00000047943	LOC108348106	-0.0961200942041112	NA	-0.461327555726415	NA	-0.2771881914684	NA	-0.594618120712128	NA
ENSRNOG00000055219	RF00100	0	NA	-0.177127260229005	NA	0	NA	0	NA
ENSRNOG00000050104	LOC108348122	0.28712475365815	0.229817284336209	0.192952977029302	0.558497344141976	0.177747461149358	0.518315847654834	0.861896713187638	0.000731623419267225
ENSRNOG00000049708	Wdr62	0.281201355090011	NA	0.129212036994962	NA	-0.189804209695807	NA	0.013903486104623	NA
ENSRNOG00000024880	Ovol3	NA	NA	NA	NA	NA	NA	NA	NA
ENSRNOG00000050560	LOC103690054	-0.0966438784374928	NA	0.0476989842644521	NA	0.0149355634264788	NA	-0.223472512757438	NA
ENSRNOG00000020781	LOC103690005	0.377760818458736	0.69550718343938	-0.476382177929685	0.685660406429093	-0.580395814074846	0.5116009328961	0.217311615262205	0.864947585153337
ENSRNOG00000045747	Capns1	NA	NA	NA	NA	NA	NA	NA	NA
ENSRNOG00000050015	LOC687508	0.329969711543117	0.684972613018553	0.0685305214632173	0.960101225709659	-1.2809370421156	0.041954557220885	0.669441919113868	0.45279023897609
ENSRNOG00000048407	LOC100912070	-0.0434972625399347	NA	0	NA	0	NA	0	NA
ENSRNOG00000013250	Pdcd5	0	NA	0	NA	-0.139429091147666	NA	0	NA
ENSRNOG00000021144	Cebpg	0.193719867729654	0.0478619341068223	-0.0501143882615432	0.756438633172873	-0.00310834662784126	0.987777699723583	-0.0768409143142872	0.575769805851252
ENSRNOG00000010918	Cebpa	0.089949815444244	0.829975768500967	-0.298979739108082	0.502488690161884	-0.330662685983061	0.3577446345507	0.162165516305805	0.745309829040877
ENSRNOG00000010938	Slc7a10	0.417580281438819	0.0037210724293272	0.138713016934696	0.510780910031232	-0.32797787757174	0.0265733638297351	0.281276219334545	0.0959083518248478
ENSRNOG00000011451	Lrp3	0.695269046690864	1.05798729324835e-16	0.158122548168952	0.156779100403063	0.177203280060312	0.0696584778666638	0.603472592118555	1.0207509383395e-10
ENSRNOG00000056667	RF00560	0.187340124992045	NA	0.130655923146968	NA	0.0914082963843132	NA	0.0838376077323762	NA
ENSRNOG00000037393	Wdr88	0	NA	-0.100181464385011	NA	0	NA	0	NA
ENSRNOG00000011584	Gpatch1	-0.119261365148595	0.38921225469095	0.0840622279658954	0.667809412188116	0.327453421459806	0.012897386800268	-0.0884114081984872	0.625167089007033
ENSRNOG00000032232	LOC687679	0.0512786322965605	0.91381630088405	0.197816172311044	0.731352934372787	0.147695325566075	0.751948396518517	0.112324656156976	0.852634117369443
ENSRNOG00000011885	Rhpn2	-0.693654855704971	0.000142811762847958	-0.425948098154471	0.0595381307596089	-2.12043763486081	6.53724787945455e-36	-0.648895501222765	0.00160705361007147
ENSRNOG00000022393	Faap24	0.593843777395985	0.130091888849976	0.363158762097793	0.494433301811542	0.558312591157924	0.180509244367264	0.550726365078066	0.239663539730281
ENSRNOG00000012140	Cep89	-0.627417639110809	9.32075352478234e-06	-0.243986299006459	0.212790256713192	0.295118406215342	0.0986105257660547	-0.361073497657949	0.0395223631354985
ENSRNOG00000012344	Slc7a9	-2.55833624441066	0.000305384143695933	0.228507981072839	0.873493003111395	-1.22160074767126	0.132586897023306	0.208561914331546	0.876395265319978
ENSRNOG00000012719	Tdrd12	-1.81191423934329	0.00763393299653855	-1.65163346983142	0.034188532007733	-4.54196253951594	6.24564141675938e-14	0.192137793779663	0.885198961467096
ENSRNOG00000037380	AC136661.1	0.938071445571177	0.0549393835152772	0.6995892042568	0.249889600341918	1.09775395602698	0.0289093334354701	0.984351451778643	0.0740625630348378
ENSRNOG00000059386	Nudt19	0.0751023229521726	0.816817386495494	0.238545837817851	0.502785734378513	0.262427687582629	0.367751791076289	0.0883786857471934	0.830842170397109
ENSRNOG00000012877	Rgs9bp	-0.407311308165676	0.692317478103324	0.507517305817295	NA	0.96286386535705	0.249093920813843	0.934022712175646	0.321246013280338
ENSRNOG00000052814	Ankrd27	0.589627721849692	6.69024352943201e-08	-0.141144457183095	0.363623534961112	0.995711573312191	5.78251853975668e-17	0.198321985675121	0.159519808944213
ENSRNOG00000050827	NEWGENE_1310561	NA	NA	NA	NA	NA	NA	NA	NA
ENSRNOG00000021573	Dpy19l3	0.687240561897818	2.13568126428362e-18	-0.707966291376294	3.00237310595408e-19	-0.0181487149868536	0.879886824547677	-1.40509075416728	7.49321878597208e-76
ENSRNOG00000013565	Zfp507	-0.410600158612852	0.0205427458173887	-0.156589570141011	0.556344480571064	0.00053638864162752	1	-0.354695954592004	0.0842256984328662
ENSRNOG00000057350	AABR07002997.1	-0.327220887010597	0.192479427289209	-0.330736266675011	0.286352939988518	-0.191635105677734	0.523776213011197	-0.377214846507321	0.202852215440686
ENSRNOG00000057563	AABR07002997.2	NA	NA	NA	NA	NA	NA	NA	NA
ENSRNOG00000052011	AABR07003001.1	0.958705333074804	0.233238035457973	0.000300517697341382	NA	0.808857231006314	0.302198852836031	0.347130004056149	NA
ENSRNOG00000059068	AABR07003001.2	NA	NA	NA	NA	NA	NA	NA	NA
ENSRNOG00000013938	Tshz3	2.72081936629164	4.68439508154039e-20	1.37897589578923	1.68693397928142e-05	1.97318352076032	5.74401352847524e-11	2.61083639019345	1.56606164755321e-17
ENSRNOG00000054448	RF00100	NA	NA	NA	NA	NA	NA	NA	NA
ENSRNOG00000060688	AABR07003007.1	0.251200750027788	NA	0.204683237903363	NA	0.0115440194527211	NA	0.157864922488771	NA
ENSRNOG00000040273	RGD1562402	0.763618820787894	0.133020525451032	1.002847027116	0.0754396500949005	2.0024968757192	9.07701599884015e-05	0.751000458737138	0.196882705444306
ENSRNOG00000053072	AABR07003024.1	NA	NA	NA	NA	NA	NA	NA	NA
ENSRNOG00000014163	Zfp536	0.782198515297696	4.93541031182925e-05	-0.597885925539558	0.00424092788115028	-0.97523408655182	1.39918337627603e-07	0.000356136131941716	1
ENSRNOG00000054000	AABR07003030.1	-0.920757100801429	0.308709666372721	-0.472979296635909	NA	-0.999722531901455	0.244322733659058	-0.250684271576373	NA
ENSRNOG00000055070	AABR07003030.2	1.0088114074896	0.0237843372588761	-0.560829878257997	0.297089325138983	-0.7561127770503	0.0826493986007785	0.475037124530529	0.433011156503492
ENSRNOG00000055997	RF00026	0.110394329148052	NA	0.0537101273029751	NA	0.0144625005403199	NA	0.00689181188838303	NA
ENSRNOG00000014463	Uri1	0.399602904466297	2.18000435241131e-05	0.152499569569356	0.229649171979769	0.373663673288713	0.000234707639227759	0.0408326327619771	0.80402163035057
ENSRNOG00000055333	AABR07003040.1	-0.135591849474709	NA	-0.234199333987269	NA	0	NA	-0.304172381752629	NA
ENSRNOG00000014786	Ccne1	1.2646560817941	1.96173417769877e-06	0.234649237195263	0.566559007042272	1.07800855003933	0.000160012688062083	0.749320719219149	0.0151150964812825
ENSRNOG00000056351	RF00066	-0.0434972625399349	NA	0	NA	0	NA	0	NA
ENSRNOG00000014966	LOC690000	0.344463825127017	0.0164441535750668	-0.32318099800089	0.0438547218275087	-0.6788211594831	4.24517702028261e-07	-0.046889316409919	0.847744747591682
ENSRNOG00000052041	RF00026	-0.0423716782768616	NA	0	NA	-0.21637488699166	NA	0	NA
ENSRNOG00000027724	Plekhf1	0.630675204813547	0.0961661172184431	-0.179164449846653	0.764230519683553	-2.37976668569203	3.0249398512049e-14	0.0499156906469211	0.943891409004314
ENSRNOG00000027646	Pop4	-0.0172365598778937	0.921970232498463	0.0124323086480557	0.963876142395397	-0.431419703825975	0.000475697798660578	0.0180480625701129	0.944045839225067
ENSRNOG00000051237	AC120712.3	1.00752461110034	0.000540319127850184	-0.188307505318077	0.682695178039163	-0.114706577201944	0.765263712760758	0.746079821443419	0.0337063337362789
ENSRNOG00000046335	AC120712.2	NA	NA	NA	NA	NA	NA	NA	NA
ENSRNOG00000032204	Uqcrb	0.225848038921672	0.0289559668603346	0.0804316001453322	0.615372317060579	0.0968607576041125	0.446022816147071	-0.221293982648646	0.0606294349996092
ENSRNOG00000027370	LOC690114	0.0405247797735212	NA	-0.185921228048409	NA	0.0257504291697966	NA	-0.124730861505026	NA
ENSRNOG00000054492	RF00026	NA	NA	NA	NA	NA	NA	NA	NA
ENSRNOG00000015168	LOC365238	0.181659174399991	0.857932943563076	0.133207201295054	0.929510916734202	0.640869794620262	0.474477672788413	0.396048744631477	0.728558507764584
ENSRNOG00000059938	AC120712.4	0.247016611219187	0.69539775103443	0.241251203748104	0.778721181356701	0.270680372815342	0.675952343319272	0.481149329546834	0.496458459961352
ENSRNOG00000061879	AABR07071904.2	-0.165140529351757	NA	-0.212845418167796	NA	0.027137649546135	NA	-0.129733301674525	NA
ENSRNOG00000052237	AABR07071904.1	-0.165129372488093	0.594276014822781	-0.101341377092156	0.822072235801376	1.2978736571231	7.42388768108809e-06	0.265330792898357	0.459621201889943
ENSRNOG00000054364	RF00026	NA	NA	NA	NA	NA	NA	NA	NA
ENSRNOG00000037364	AABR07003049.1	-1.5664272908405	0.0482039058057076	-1.45646424607706	0.112519542729157	-0.419142563262854	0.672497157935491	-0.222765133806238	0.867516758303103
ENSRNOG00000053564	AABR07003049.2	-0.199881387393278	NA	-0.225684372950665	NA	0	NA	-0.191414892773553	NA
ENSRNOG00000058448	AABR07003051.1	0.0307858529112006	NA	0.0751970431904352	NA	-0.205032380321217	NA	-0.216169942002587	NA
ENSRNOG00000037366	AABR07003056.1	NA	NA	NA	NA	NA	NA	NA	NA
ENSRNOG00000055248	AABR07003056.2	0.269652241568323	0.795052419840456	-0.647369433172702	0.572111122216485	-0.180672598624608	0.867406506800214	0.301842429603269	0.810819871980863
ENSRNOG00000059987	AABR07003056.3	NA	NA	NA	NA	NA	NA	NA	NA
ENSRNOG00000049816	AABR07003102.1	NA	NA	NA	NA	NA	NA	NA	NA
ENSRNOG00000053427	AABR07003167.1	0.187340124992045	NA	0.130655923146968	NA	0.0914082963843131	NA	0.00689181188838298	NA
ENSRNOG00000058280	AABR07003167.2	-0.206317896831258	NA	0	NA	0	NA	-0.146999779799603	NA
ENSRNOG00000060881	AABR07003167.3	NA	NA	NA	NA	NA	NA	NA	NA
ENSRNOG00000017456	Vstm2b	0.688275113192093	0.00100285640682615	0.722712284414996	0.00156078318675706	0.600984052205045	0.00629032764119127	0.452246744279668	0.0649264632028924
ENSRNOG00000027112	MGC114499	0.322010430557747	0.741348153236342	1.23035490554633	0.201477196644044	1.42093461082051	0.0798681159878123	-0.0994843606266013	0.945678543775156
ENSRNOG00000027102	LOC690284	NA	NA	NA	NA	NA	NA	NA	NA
ENSRNOG00000014455	LOC499136	0.0261060960062449	NA	-0.160915269249765	NA	0.0144625005403199	NA	0.0068918118883831	NA
ENSRNOG00000037360	AABR07003173.1	-0.223896776191918	0.758018118901825	-0.100395667517757	0.930556071649959	0.191808086965834	0.807149493671622	0.623268532914586	0.440601688862123
ENSRNOG00000014380	Zfp788	-0.165440554368712	0.199142860552888	-0.252419239171812	0.0677152022846425	0.039974186527744	0.80852152157773	-0.575488380834994	9.5574399341237e-07
ENSRNOG00000043707	AABR07003186.1	NA	NA	NA	NA	NA	NA	NA	NA
ENSRNOG00000037331	Cd33	0.153916150332404	0.582741135257154	0.126329814746981	0.744016337385292	-0.727429817539492	0.00100910126076129	-0.250170726501323	0.406933853270745
ENSRNOG00000059992	Siglecl1	NA	NA	NA	NA	NA	NA	NA	NA
ENSRNOG00000032990	LOC690483	0.83462651465861	0.370455808470817	0.550900291834809	NA	0.502768039576234	0.606223782364122	-0.297804513233628	0.817401459012107
ENSRNOG00000017918	Iglon5	-0.417961990065626	0.00496026095360263	0.140631719239117	0.551627005111231	-1.33584262388587	3.5164717172798e-22	0.714703257904486	6.88438625003264e-05
ENSRNOG00000023411	Vsig10l	-0.135290129187504	0.753256320216805	0.0882707038364365	0.887532736954973	-0.678898608906693	0.0463025041938406	0.550143087330492	0.192637534774751
ENSRNOG00000017851	Etfb	0.0896905982234082	0.639528564643893	-0.0857310790837235	0.738538795620171	-0.173661036324659	0.333283700509395	0.0991949286151079	0.67969041529992
ENSRNOG00000060684	AABR07003186.2	-0.360185525439092	NA	-0.62032983483082	NA	0.0793253385147158	0.941262186963839	-0.396960977050229	NA
ENSRNOG00000037333	Cldnd2	-0.0434972625399347	NA	0	NA	0	NA	0	NA
ENSRNOG00000017749	Nkg7	0	NA	0	NA	-0.677550707057861	NA	0	NA
ENSRNOG00000017681	Lim2	0	NA	0	NA	0	NA	-0.146999779799603	NA
ENSRNOG00000037339	Siglec10	0.450740310794203	0.581999939214335	0.34337270871945	0.761520141761957	0.0631981668897076	0.952260621270572	0.459015356353936	0.646460833041235
ENSRNOG00000021474	Siglec5	0.1263233868813	0.637076917988976	0.0503424690259663	0.901931946508129	-0.306723847964017	0.195318009390084	-0.336614196825165	0.194239457678437
ENSRNOG00000024056	Zfp17	-0.28434215526118	0.103097502941182	-0.15256852670499	0.531583883946007	0.15361775868654	0.448338867014415	-0.338021469103403	0.0743035313530955
ENSRNOG00000037348	AABR07003187.1	0.525228245842162	0.414053730521332	0.394676366948556	0.650548457433529	-0.027222834997467	0.977338074235423	-0.263098843415098	0.756145090429838
ENSRNOG00000056570	RF00026	NA	NA	NA	NA	NA	NA	NA	NA
ENSRNOG00000052529	RF00026	NA	NA	NA	NA	NA	NA	NA	NA
ENSRNOG00000053135	AABR07003190.1	NA	NA	NA	NA	NA	NA	NA	NA
ENSRNOG00000043280	Vom2r37	-0.202708796770577	NA	0	NA	0	NA	0	NA
ENSRNOG00000047662	Klk1c12	NA	NA	NA	NA	NA	NA	NA	NA
ENSRNOG00000046670	LOC100911689	NA	NA	NA	NA	NA	NA	NA	NA
ENSRNOG00000049279	Klk1c8	NA	NA	NA	NA	NA	NA	NA	NA
[truncated: 31,478 more rows]

## Sheet: hippocampus
	gene name	hippocampus_vs_olfactive_bulb		hippocampus_vs_cortex		hippocampus_vs_spinal_cord		hippocampus_vs_striatum
[truncated: 32,884 more rows]

[truncated: 2 more sheets: spinal_cord, striatum]
