# Supplementary material for: Small RNA-Seq reveals novel miRNAs shaping the transcriptomic identity of rat brain structures
Source: Life Sci Alliance. 2018 Sep 30;1(5):e201800018. doi: 10.26508/lsa.201800018 (PMC6238413; doi:10.26508/lsa.201800018)
Supplement: Supplementary file 10 [file LSA-2018-00018_TableS10.xlsx]

## Sheet: olfactory bulb
Specifically upregulated miRNA	downregulated target mRNA		Specifically downregulated miRNA	upregulated target mRNA
miR-429	kcnq4		miR-544-3p	lhx1
miR-200b-3p	anln			nipal4
miR-200c-3p	casr			slc6a5
				vstm4
miR-141-3p	slc6a5			hoxc6
miR-200a-3p				csf1
				pax2
miR-96-5p	col25a1			cdk18
	slco4c1			itgb3
	slc18a3			ebf2
				cnp
miR-183-5p	caln1			drgx
				plekhb1
miR-182	col25a1			slc6a9
				ldlrap1
miR-301b-3p	st18			hoxb4
	ugt8			lmx1b
	slc24a2			rasef
	iqgap2			ngfr
				adcy7
novel-miR-47-5p	caln1			tmem189
				lbx1
				stard5
				ret
				hoxd9
				itpkb
				aplnr
				hoxd3
				cysltr2
				prx
				clec5a
				fgf1
				sema4d
				atp10b
				paqr6
				tlx3
				adamts4
				mog
				nkx2-2
				nkd1

## Sheet: cortex
Specifically downregulated miRNA	upregulated target mRNA
novel-miR-28-3p	sbno1
	mb21d2
	col19a1
	tppp
	epb41l1
	snx19
	dmtn
	kcnh1
	gabrb2
	ccl27
	mlxip
	rgd1562136
	sgtb
	bsn
	atrnl1
	rnf144b
	kcns1
	vip
	hspa12a
	Cbln2

## Sheet: hippocampus
Specifically downregulated miRNA	upregulated target mRNA
miR-3065-5p	myom2
	otub2
	xpot
	ttc26
	atp6v0a1
	slit1
	stim2
	st5
	dlg3
	gpc4
	ryr2
	fbxo10
	xpnpep1
	kpna4
	dab1
	ube2k
	slc44a5
	col25a1
	megf11
	acsl4
	spns2
	tnrc6c
	btbd9
	rpn1
	scn3b
	prkcg
	nmt1
	tcf4
	abi1
	slc16a14
	gnaq
	rab2a
	ntrk3
	grhpr
	rab3c
	fam155b
	dnajc27
	abca3
	chrd
	lonrf3
	dock4
	itga11
	lsamp
	pcdh19
	mid1
	ago1
	mzf1
	ak4
	sema5a
	hapln4
	kif26b
	ric8a
	gpr161
	cdh11
	tbkbp1
	atp6v1a
	armc8
	mapk8ip2
	cpe
	ndst3
	sprn
	ksr1
	atp2b3
	fgf13
	gnrhr
	dpyd
	rimbp2
	atp6v1b2
	chl1
	rspo2

## Sheet: spinal cord
Specifically upregulated miRNA	downregulated target mRNA		Specifically downregulated miRNA	upregulated target mRNA
miR-10b-5p	kcnmb4		miR-344g	lhx1
	lipg			nipal4
	slc7a8			slc6a5
	spata2l			vstm4
	celf2			hoxc6
	cnksr2			csf1
	fosl2			pax2
	lamc2			cdk18
	hs6st3			itgb3
	akap5			ebf2
	psd			cnp
	gpr12			drgx
	gabra4			plekhb1
	camk4			slc6a9
	gda			ldlrap1
	gabrb2			hoxb4
	pak6			lmx1b
	bcl11b			rasef
	cdk5r1			ngfr
	atxn1			adcy7
	gria2			tmem189
	cacna1i			lbx1
	neurl1b			stard5
	neto1			ret
	prdm16			hoxd9
				itpkb
miR-196b-5p	celf2			aplnr
miR-196a-5p	cecr6			hoxd3
	rasgrp1			cysltr2
	otx1			prx
				clec5a
miR-10a-5p	cecr6			fgf1
	nr4a3			sema4d
	rnf165			atp10b
	dlgap2			paqr6
	shisa7			tlx3
	camk2b			adamts4
	gabrb2			mog
	fosl2			nkx2-2
				nkd1
miR-615	ctxn1
	slc17a7		miR-551b-5p	lhx1
	syngap1			abhd15
	agap2			otud7b
	bmp3			cpd
	spata2l			tmem117
	celf2			nipal4
	ankrd33b			fam19a4
	fosl2			micall1
	dlg3			ndrg1
	hs6st3			cldn11
	islr2			cnp
	fosb			drgx
	dmrta2			pax8
	synpo			myo1d
	shisa7			slc35d2
	ptk2b			mylk
	prdm16			rasef
	arc			plp1
	rasd2			aif1l
	dlgap2			pkd2l1
	lipg			hspa2
	pak6			irx3
	bcl11b			ugt8
	chrm1			hoxd9
	atxn1			lhx4
	hpcal4			lrat
	cacna1i			mog
	neurl1b			enpp2
	dpf1			vstm4
	wipf3			emilin2
	dapk1			glp1r
	unc13a			irx5
	ankrd63			entpd5
				avpr1a
				pls1
				nkx6-1
				p2rx5
				hoxb3
				atp10b
				plekhf1
				dmbx1
				aqp4
				cd44
				mamdc2
				rtkn2
				foxb1
				bace2
				pmp2
				mab21l1
			novel-miR-8-3p	trim36
				irx2
